# Supplementary material for: Oil palm phenolics attenuate changes caused by an atherogenic diet in mice
Source: PubMed Central journal article supplement (PMC3573186; doi:10.1007/s00394-012-0346-0), 2012-04-11
Supplement: 394_2012_346_MOESM2_ESM.pdf [file 394_2012_346_MOESM2_ESM.pdf]

**Article Title:** Oil palm phenolics attenuate changes caused by an atherogenic diet in mice.

**Journal Name:** European Journal of Nutrition.

**Author Names:** Soon-Sen Leow, Shamala Devi Sekaran, Kalyana Sundram, YewAi Tan, Ravigadevi Sambanthamurthi.

**Corresponding Author:** Ravigadevi Sambanthamurthi; Malaysian Palm Oil Board, No. 6, Persiaran Institusi, Bandar Baru Bangi, 43000 Kajang, Selangor, Malaysia; E-mail: [raviga@mpob.gov.my](mailto:raviga@mpob.gov.my).

## **Supplementary Material 2**

This file contains six tables which show lists of genes, as well as GenMAPPs and gene ontologies significantly changed by the atherogenic diet in livers, spleens and hearts of mice. The |Differential Score| for all genes is more than 20, equivalent to a P Value of less than 0.01. All GenMAPPs and gene ontologies had Permuted P Values of less than 0.01, Numbers of Genes Changed of more than or equal to 2 and Z Scores of more than 2.

**Table A1** Genes significantly changed by the atherogenic diet in livers.

**Table A2** GenMAPPs and gene ontologies significantly changed by the atherogenic diet in livers.

**Table A3** Genes significantly changed by the atherogenic diet in spleens.

**Table A4** GenMAPPs and gene ontologies significantly changed by the atherogenic diet in spleens.

**Table A5** Genes significantly changed by the atherogenic diet in hearts.

**Table A6** GenMAPPs and gene ontologies significantly changed by the atherogenic diet in hearts.

TABLE A1

| GENES UP-REGULATED BY THE ATHEROGENIC DIET IN LIVERS |            |             |               |             |                                                                                                  |
|------------------------------------------------------|------------|-------------|---------------|-------------|--------------------------------------------------------------------------------------------------|
| TargetID                                             | Diff_Score | Fold_Change | Symbol        | Accession   | Definition                                                                                       |
| sc117355.9_0-S                                       | 371.3336   | 107.61      | Glul          | NM_008131.2 | Mus musculus glutamate-ammonia ligase (glutamine synthase) (Glul), mRNA.                         |
| sc145125.3_164-S                                     | 371.3336   | 91.15       | BC006662      | NM_145466   | Mus musculus cDNA sequence BC006662 (BC006662), mRNA.                                            |
| sc145459.17_81-S                                     | 371.3336   | 86.72       | Kpna3         | NM_008466.2 | Mus musculus karyopherin (importin) alpha 3 (Kpna3), mRNA.                                       |
| sc133851.12.1_1-S                                    | 371.3336   | 72.49       | 1810047C23Rik | NM_138668.1 | Mus musculus RIKEN cDNA 1810047C23 gene (1810047C23Rik), mRNA.                                   |
| sc10012946.2_160-S                                   | 371.3336   | 72.08       | Crry          | NM_013499.1 | Mus musculus complement receptor related protein (Crry), mRNA.                                   |
| sc142345.1.5_1-S                                     | 371.3336   | 67.99       | Tmem30b       | NM_178715.2 |                                                                                                  |
| sc10073197.1_297-S                                   | 371.3336   | 66.48       | D19Ertid703e  | NM_029456.1 |                                                                                                  |
| sc1012314.1_140-S                                    | 371.3336   | 61.53       | Calm2         | NM_007589   | Mus musculus calmodulin 2 (Calm2), mRNA.                                                         |
| sc149312.6.1_7-S                                     | 371.3336   | 57.76       | Kng1          | NM_023125.2 |                                                                                                  |
| sc1076959.8_48-S                                     | 371.3336   | 55.45       | 2210412K09Rik | NM_029814.1 | Mus musculus RIKEN cDNA 2210412K09 gene (2210412K09Rik), mRNA.                                   |
| sc1013690.1_50-S                                     | 371.3336   | 51.88       | Eif4g2        | NM_013507.2 | Mus musculus eukaryotic translation initiation factor 4, gamma 2 (Eif4g2), mRNA.                 |
| sc139983.12.1_110-S                                  | 371.3336   | 50.69       | Nup88         | NM_172394.1 | Mus musculus nucleoporin 88 (Nup88), mRNA.                                                       |
| sc148279.10.1_23-S                                   | 371.3336   | 50.2        | Mrpl39        | NM_017404.2 | Mus musculus mitochondrial ribosomal protein L39 (Mrpl39), mRNA.                                 |
| sc10098221.1_97-S                                    | 371.3336   | 49.84       | Ga17          | NM_145380.1 | Mus musculus dendritic cell protein GA17 (Ga17), mRNA.                                           |
| sc132353.2.4_40-S                                    | 371.3336   | 47.48       | Ndufc2        | NM_024220.1 |                                                                                                  |
| sc1015331.1_246-S                                    | 371.3336   | 46.5        | Hmgn2         | NM_016957.2 | Mus musculus high mobility group nucleosomal binding domain 2 (Hmgn2), mRNA.                     |
| sc1000764.1_2-S                                      | 371.3336   | 45.94       | Sumo1         | NM_009460.1 |                                                                                                  |
| sc140255.4.1_5-S                                     | 371.3336   | 45.52       | 0610009B22Rik | NM_025319.1 | Mus musculus RIKEN cDNA 0610009B22 gene (0610009B22Rik), mRNA.                                   |
| sc124063.27.1_21-S                                   | 371.3336   | 42.17       | Jak1          | NM_146145.1 | Mus musculus Janus kinase 1 (Jak1), mRNA.                                                        |
| sc10104923.5_14-S                                    | 371.3336   | 39.15       | AL024210      | NM_134052.1 | Mus musculus expressed sequence AL024210 (AL024210), mRNA.                                       |
| sc10028185.2_148-S                                   | 371.3336   | 39.08       | Tomm70a       | NM_138599.2 |                                                                                                  |
| sc147189.8.1_128-S                                   | 371.3336   | 38.59       | Mrpl13        | NM_026759.2 | Mus musculus mitochondrial ribosomal protein L13 (Mrpl13), mRNA.                                 |
| sc10020479.2_290-S                                   | 371.3336   | 38.32       | Vps4b         | NM_009190.1 | Mus musculus vacuolar protein sorting 4b (yeast) (Vps4b), mRNA.                                  |
| sc140878.26_32-S                                     | 371.3336   | 33.32       | Nbr1          | NM_008676.1 | Mus musculus neighbor of Brca1 gene 1 (Nbr1), mRNA.                                              |
| sc10002761.1_5-S                                     | 371.3336   | 31.94       | Ptp4a2        | NM_008974.2 | Mus musculus protein tyrosine phosphatase 4a2 (Ptp4a2), mRNA.                                    |
| sc1073024.7_20-S                                     | 371.3336   | 31.39       | 2900064A13Rik | NM_133749.1 | Mus musculus RIKEN cDNA 2900064A13 gene (2900064A13Rik), mRNA.                                   |
| sc128579.2_420-S                                     | 371.3336   | 30.24       | Fin14         |             | Mus musculus fibroblast growth factor inducible 14 (Fin14), mRNA.                                |
| sc1000028.1_0-S                                      | 371.3336   | 29.63       | Bccip         | NM_025392.1 | Mus musculus BRCA2 and CDKN1A interacting protein (Bccip), mRNA.                                 |
| sc142561.14.1_88-S                                   | 371.3336   | 28.52       | Dld           | NM_007861.2 | Mus musculus dihydrolipoamide dehydrogenase (Dld), mRNA.                                         |
| sc1018606.1_11-S                                     | 371.3336   | 27.74       | Enpp2         | NM_015744   | Mus musculus ectonucleotide pyrophosphatase/phosphodiesterase 2 (Enpp2), mRNA.                   |
| sc10017859.1_306-S                                   | 371.3336   | 27.15       | Mxi1          | NM_010847.1 | Mus musculus Max interacting protein 1 (Mxi1), mRNA.                                             |
| sc119667.9.1_67-S                                    | 371.3336   | 24.95       | Rsu1          | NM_009105   | Mus musculus Ras suppressor protein 1 (Rsu1), mRNA.                                              |
| sc10015078.1_248-S                                   | 371.3336   | 24.16       | H3f3a         | NM_008210.2 | Mus musculus H3 histone, family 3A (H3f3a), mRNA.                                                |
| sc10002419.1_3-S                                     | 371.3336   | 24.04       | Trappc6b      | BC031464    | Mus musculus trafficking protein particle complex 6B (Trappc6b), mRNA.                           |
| sc148508.5.1_8-S                                     | 371.3336   | 24.04       | 2310056P07Rik | XM_148611.1 | Mus musculus RIKEN cDNA 2310056P07 gene (2310056P07Rik), mRNA.                                   |
| sc120502.5_452-S                                     | 371.3336   | 22.89       | Lin7c         | NM_011699   | Mus musculus lin 7 homolog c (C. elegans) (Lin7c), mRNA.                                         |
| sc1019231.6_192-S                                    | 371.3336   | 22.32       | Ptma          | NM_008972.1 | Mus musculus prothymosin alpha (Ptma), mRNA.                                                     |
| sc1022335.1_61-S                                     | 371.3336   | 22.09       | Vdac3         | NM_011696.1 | Mus musculus voltage-dependent anion channel 3 (Vdac3), mRNA.                                    |
| sc144723.2_201-S                                     | 371.3336   | 20.77       | B230219D22Rik | NM_181278.2 | Mus musculus RIKEN cDNA B230219D22 gene (B230219D22Rik), mRNA.                                   |
| sc10245688.12_1-S                                    | 371.3336   | 20.63       | Rbbp7         | NM_009031.2 | Mus musculus retinoblastoma binding protein 7 (Rbbp7), mRNA.                                     |
| sc153773.1.1793_9-S                                  | 371.3336   | 20.57       | Acsl4         | NM_207625.1 | Mus musculus acyl-CoA synthetase long-chain family member 4 (Acsl4), transcript variant 2, mRNA. |
| sc140787.10.7_5-S                                    | 371.3336   | 19.16       | Psm12         | NM_025894.1 | Mus musculus proteasome (prosome, macropain) 26S subunit, non-ATPase, 12 (Psm12), mRNA.          |
| sc155039.15_103-S                                    | 371.3336   | 19.02       | Ddx3x         | NM_010028   | Mus musculus DEAD/H (Asp-Glu-Ala-Asp/His) box polypeptide 3, X-linked (Ddx3x), mRNA.             |
| sc1070356.1_235-S                                    | 371.3336   | 18.51       | St13          | NM_133726.1 | Mus musculus suppression of tumorigenicity 13 (St13), mRNA.                                      |
| sc1020320.8_193-S                                    | 371.3336   | 18.34       | Sdfr1         | NM_009145.1 | Mus musculus stromal cell derived factor receptor 1 (Sdfr1), mRNA.                               |
| sc1030926.11_17-S                                    | 371.3336   | 17.86       | Txn12         | NM_023140.3 | Mus musculus thioredoxin-like 2 (Txn12), mRNA.                                                   |
| sc1076808.4_30-S                                     | 371.3336   | 17.45       | Rpl18a        | XM_194410.2 |                                                                                                  |
| sc128744.16_312-S                                    | 371.3336   | 16.99       | Anxa4         | NM_013471   | Mus musculus annexin A4 (Anxa4), mRNA.                                                           |
| sc1000086.1_135-S                                    | 371.3336   | 16.96       | AA959742      | NM_133807.1 | Mus musculus expressed sequence AA959742 (AA959742), mRNA.                                       |
| sc130665.8.1_14-S                                    | 371.3336   | 15.98       | 1110032O16Rik | XM_133813.4 | Mus musculus RIKEN cDNA 1110032O16 gene (1110032O16Rik), mRNA.                                   |
| sc120874.15.4_12-S                                   | 371.3336   | 15.55       | Psm14         | NM_021526   | Mus musculus proteasome (prosome, macropain) 26S subunit, non-ATPase, 14 (Psm14), mRNA.          |
| sc1068051.5_64-S                                     | 371.3336   | 14.68       | Nutf2         | NM_026532.2 | Mus musculus nuclear transport factor 2 (Nutf2), mRNA.                                           |
| sc141197.5.1_16-S                                    | 371.3336   | 14.13       | 0610009H04Rik | NM_018854.3 | Mus musculus RIKEN cDNA 0610009H04 gene (0610009H04Rik), mRNA.                                   |

|                     |          |       |               |             |                                                                                                                                                |
|---------------------|----------|-------|---------------|-------------|------------------------------------------------------------------------------------------------------------------------------------------------|
| sci30059.16.1 6-S   | 371.3336 | 13.31 | Mpp6          | NM_019939.1 | Mus musculus membrane protein, palmitoylated 6 (MAGUK p55 subfamily member 6) (Mpp6), mRNA.                                                    |
| sci0014122.1 142-S  | 371.3336 | 12.83 | Fbp3          |             |                                                                                                                                                |
| sci54930.9.1 1-S    | 371.3336 | 12.6  | Hprt          | NM_013556   |                                                                                                                                                |
| sci49695.8 112-S    | 371.3336 | 12.48 | Vapa          | NM_013933.2 | Mus musculus vesicle-associated membrane protein, associated protein A (Vapa), mRNA.                                                           |
| sci20734.8 508-S    | 371.3336 | 12.39 | Plekha3       | NM_031256.2 | Mus musculus pleckstrin homology domain-containing, family A (phosphoinositide binding specific) member 3 (Plekha3), mRNA.                     |
| sci0056351.1 126-S  | 371.3336 | 12.22 | Tebp          | NM_019766.2 | Mus musculus telomerase binding protein, p23 (Tebp), mRNA.                                                                                     |
| sci31078.5 227-S    | 371.3336 | 12.02 | 2210412D01Rik | NM_133722.1 | Mus musculus RIKEN cDNA 2210412D01 gene (2210412D01Rik), mRNA.                                                                                 |
| sci017749.3 11-S    | 371.3336 | 11.46 | Polr2k        | NM_023127   | Mus musculus polymerase (RNA) II (DNA directed) polypeptide K (Polr2k), mRNA.                                                                  |
| sci071955.1 257-S   | 371.3336 | 10.46 | 2400003C14Rik | NM_028018.1 | Mus musculus RIKEN cDNA 2400003C14 gene (2400003C14Rik), mRNA.                                                                                 |
| sci29306.21.1 2-S   | 371.3336 | 10.32 | Slc25a13      | NM_015829.1 | Mus musculus solute carrier family 25 (mitochondrial carrier; adenine nucleotide translocator), member 13 (Slc25a13), mRNA.                    |
| sci056433.4 275-S   | 371.3336 | 10.23 | Vps29         | NM_019780.1 | Mus musculus vacuolar protein sorting 29 (S. pombe) (Vps29), mRNA.                                                                             |
| sci066448.4 32-S    | 371.3336 | 9.84  | Mrp120        | NM_025570.1 | Mus musculus mitochondrial ribosomal protein L20 (Mrp120), mRNA.                                                                               |
| sci076846.5 166-S   | 371.3336 | 9.71  | 3010033P07Rik | NM_029767.1 |                                                                                                                                                |
| sci42239.4 289-S    | 371.3336 | 9.56  | Npc2          | NM_023409.3 | Mus musculus Niemann Pick type C2 (Npc2), mRNA.                                                                                                |
| sci0069354.1 68-S   | 371.3336 | 9.5   | Slc38a4       | NM_027052.2 | Mus musculus solute carrier family 38, member 4 (Slc38a4), mRNA.                                                                               |
| sci25138.1 25-S     | 371.3336 | 9.42  | 1110001A12Rik | NM_029571.1 | Mus musculus RIKEN cDNA 1110001A12 gene (1110001A12Rik), mRNA.                                                                                 |
| sci35003.22 120-S   | 371.3336 | 8.99  | Adam9         | NM_007404.1 | Mus musculus a disintegrin and metalloproteinase domain 9 (meltrin gamma) (Adam9), mRNA.                                                       |
| sci0003847.1 4-S    | 371.3336 | 8.52  | 1110005A23Rik | NM_025364   | Mus musculus RIKEN cDNA 1110005A23 gene (1110005A23Rik), mRNA.                                                                                 |
| sci000299.1 29-S    | 371.3336 | 8.18  | Esd           | NM_016903.2 |                                                                                                                                                |
| sci002042.1 302-S   | 371.3336 | 7.99  |               | AK002848.1  | Mus musculus adult male kidney cDNA, RIKEN full-length enriched library, clone:0610039M20 product:ribosomal protein S12, full insert sequence. |
| sci069046.1 193-S   | 371.3336 | 7.99  | Hbld2         | NM_026921.2 | Mus musculus HESB like domain containing 2 (Hbld2), mRNA.                                                                                      |
| sci39445.1.46 133-S | 371.3336 | 7.92  | Tex2          | XM_203370.3 | Mus musculus testis expressed gene 2 (Tex2), mRNA.                                                                                             |
| sci44057.9 18-S     | 371.3336 | 7.47  | Elovl2        | NM_019423.1 | Mus musculus elongation of very long chain fatty acids (FEN1/Elo2, SUR4/Elo3, yeast)-like 2 (Elovl2), mRNA.                                    |
| sci27606.14.1 65-S  | 371.3336 | 7.44  | Afm           | NM_145146.1 | Mus musculus afamin (Afm), mRNA.                                                                                                               |
| sci069354.1 30-S    | 371.3336 | 7.26  | Slc38a4       | NM_027052.2 | Mus musculus solute carrier family 38, member 4 (Slc38a4), mRNA.                                                                               |
| sci0319152.1 297-S  | 371.3336 | 7.23  | Hist1h3h      | NM_178206   | Mus musculus histone 1, H3h (Hist1h3h), mRNA.                                                                                                  |
| sci0002303.1 158-S  | 371.3336 | 7.03  | Serpina1a     | NM_009243   | Mus musculus serine (or cysteine) proteinase inhibitor, clade A, member 1a (Serpina1a), mRNA.                                                  |
| sci33920.14 231-S   | 371.3336 | 6.87  | Gsr           | NM_010344.3 | Mus musculus glutathione reductase 1 (Gsr), mRNA.                                                                                              |
| sci42464.2 123-S    | 371.3336 | 6.73  | 1110002B05Rik | NM_134054.1 | Mus musculus RIKEN cDNA 1110002B05 gene (1110002B05Rik), mRNA.                                                                                 |
| sci35713.2.1 23-S   | 371.3336 | 6.6   | 2300009A05Rik | XM_204313.2 | Mus musculus RIKEN cDNA 2300009A05 gene (2300009A05Rik), mRNA.                                                                                 |
| sci0066885.2 329-S  | 371.3336 | 6.33  | Acad5b        | NM_025826.1 | Mus musculus acyl-Coenzyme A dehydrogenase, short/branched chain (Acad5b), mRNA.                                                               |
| sci41578.9 407-S    | 371.3336 | 5.71  | Skp1a         | NM_011543.2 | Mus musculus S-phase kinase-associated protein 1A (Skp1a), mRNA.                                                                               |
| sci0070231.1 327-S  | 371.3336 | 4.53  | Gorasp2       | NM_027352.2 | Mus musculus golgi reassembly stacking protein 2 (Gorasp2), mRNA.                                                                              |
| sci067248.2 33-S    | 371.3336 | 3.59  | Rpl39         | NM_026055.1 | Mus musculus ribosomal protein L39 (Rpl39), mRNA.                                                                                              |
| sci019896.4 30-S    | 371.3336 | 3.27  | Rpl10a        | NM_011287.1 | Mus musculus ribosomal protein L10A (Rpl10a), mRNA.                                                                                            |
| sci0110954.5 51-S   | 371.3336 | 3.12  | Rpl10         | NM_052835   | Mus musculus ribosomal protein 10 (Rpl10), mRNA.                                                                                               |
| sci19726.14.1 76-S  | 371.0959 | 14.78 | G431001I09Rik | NM_133837.2 | Mus musculus RIKEN cDNA G431001I09 gene (G431001I09Rik), mRNA.                                                                                 |
| sci068735.6 63-S    | 370.6798 | 5.08  | Mrps18c       | XM_194230.3 |                                                                                                                                                |
| sci070456.4 0-S     | 370.0436 | 20.03 | 2610205H19Rik | NM_027430.1 | Mus musculus RIKEN cDNA 2610205H19 gene (2610205H19Rik), mRNA.                                                                                 |
| sci0078655.1 180-S  | 366.8107 | 35.32 | Eif3s1        | NM_144545.1 | Mus musculus eukaryotic translation initiation factor 3, subunit 1 alpha (Eif3s1), mRNA.                                                       |
| sci055980.1 58-S    | 363.3732 | 42.73 | Impa1         | NM_018864.3 | Mus musculus inositol (myo)-1(or 4)-monophosphatase 1 (Impa1), mRNA.                                                                           |
| sci072201.1 290-S   | 362.6922 | 20.14 | 2600013N14Rik | NM_152812.1 | Mus musculus RIKEN cDNA 2600013N14 gene (2600013N14Rik), mRNA.                                                                                 |
| sci16639.44.189 5-S | 361.2323 | 8.43  | Fn1           | XM_129845.3 | Mus musculus fibronectin 1 (Fn1), mRNA.                                                                                                        |
| sci43183.10.1 88-S  | 358.9626 | 23.99 | Sip1          | NM_025656.1 | Mus musculus survivor of motor neuron protein interacting protein 1 (Sip1), mRNA.                                                              |
| sci013006.15 44-S   | 358.7571 | 43.53 | Cspg6         | NM_007790.2 | Mus musculus chondroitin sulfate proteoglycan 6 (Cspg6), mRNA.                                                                                 |
| sci0114893.1 279-S  | 357.7791 | 9     | Tes3          | NM_033623.1 | Mus musculus testis derived transcript 3 (Tes3), mRNA.                                                                                         |
| sci31053.2.1 38-S   | 356.1904 | 5.39  | 1810020E01Rik | NM_025460.1 | Mus musculus RIKEN cDNA 1810020E01 gene (1810020E01Rik), mRNA.                                                                                 |
| sci30789.23.1 30-S  | 355.023  | 64.16 | Copb1         | NM_033370   | Mus musculus coatamer protein complex, subunit beta 1 (Copb1), mRNA.                                                                           |
| sci018538.1 192-S   | 354.4935 | 16.08 | Pcna          | NM_011045.1 | Mus musculus proliferating cell nuclear antigen (Pcna), mRNA.                                                                                  |
| sci019988.6 33-S    | 354.2966 | 8.52  | Rpl6          | NM_011290   | Mus musculus ribosomal protein L6 (Rpl6), mRNA.                                                                                                |
| sci52780.10 0-S     | 353.8468 | 37.83 | Slc3a2        | NM_008577.2 | Mus musculus solute carrier family 3 (activators of dibasic and neutral amino acid transport), member 2 (Slc3a2), mRNA.                        |
| sci29313.9.1 4-S    | 351.7892 | 6.66  | Pon3          | NM_173006.1 | Mus musculus paraoxonase 3 (Pon3), mRNA.                                                                                                       |
| sci46659.10 50-S    | 351.5438 | 3.69  | Zfp385        | NM_013866.1 | Mus musculus zinc finger protein 385 (Zfp385), mRNA.                                                                                           |
| sci16458.7.1 28-S   | 349.3582 | 14.03 | Thap4         | NM_025920   | Mus musculus THAP domain containing 4 (Thap4), mRNA.                                                                                           |
| sci020430.29 22-S   | 345.3049 | 6.25  | Cyfp1         | NM_011370.1 | Mus musculus cytoplasmic FMR1 interacting protein 1 (Cyfp1), mRNA.                                                                             |
| sci0070351.2 206-S  | 345.0587 | 10.16 | Ppp4r1        | NM_146081.1 | Mus musculus protein phosphatase 4, regulatory subunit 1 (Ppp4r1), mRNA.                                                                       |

|                |       |          |        |               |             |                                                                                                                            |
|----------------|-------|----------|--------|---------------|-------------|----------------------------------------------------------------------------------------------------------------------------|
| scl00268996.2  | 185-S | 344.1229 | 8.52   | Ss18          | NM_009280.1 | Mus musculus synovial sarcoma translocation, Chromosome 18 (Ss18), mRNA.                                                   |
| scl0013809.2   | 54-S  | 344.0056 | 62.76  | Enpep         | NM_007934.1 | Mus musculus glutamyl aminopeptidase (Enpep), mRNA.                                                                        |
| scl020714.5    | 72-S  | 341.4685 | 3.01   | Serpina3k     | XM_127127.2 | Mus musculus serine (or cysteine) proteinase inhibitor, clade A, member 3K (Serpina3k), mRNA.                              |
| scl017448.9    | 233-S | 340.0377 | 46.43  | Mdh2          | NM_008617.2 | Mus musculus malate dehydrogenase 2, NAD (mitochondrial) (Mdh2), mRNA.                                                     |
| scl35879.4     | 19-S  | 338.8509 | 10     | Sdhd          | NM_025848.1 | Mus musculus succinate dehydrogenase complex, subunit D, integral membrane protein (Sdhd), mRNA.                           |
| scl0056334.1   | 201-S | 338.6403 | 7.77   | 1110032D12Rik | NM_019770.1 | Mus musculus RIKEN cDNA 1110032D12 gene (1110032D12Rik), mRNA.                                                             |
| scl43225.27.1  | 94-S  | 338.5223 | 10.03  | Scfd1         | XM_126906.2 |                                                                                                                            |
| scl17471.3     | 7-S   | 337.0371 | 38.58  | Ppp1r15b      | XM_148953.1 | Mus musculus protein phosphatase 1, regulatory (inhibitor) subunit 15b (Ppp1r15b), mRNA.                                   |
| scl41687.5     | 165-S | 336.4478 | 5.86   | D11Erttd603e  | NM_026023.3 | Mus musculus DNA segment, Chr 11, ERATO Doi 603, expressed (D11Erttd603e), mRNA.                                           |
| scl020091.3    | 53-S  | 335.8276 | 18.11  | Rps3a         | NM_016959.2 | Mus musculus ribosomal protein S3a (Rps3a), mRNA.                                                                          |
| scl17047.9.4   | 6-S   | 334.9648 | 13.03  | BC013667      | NM_172266.1 | Mus musculus cDNA sequence BC013667 (BC013667), mRNA.                                                                      |
| scl069010.2    | 129-S | 332.558  | 4.66   | Anapc13       | NM_181394.1 |                                                                                                                            |
| scl00102103.1  | 84-S  | 329.8437 | 37.94  | Mtus1         | NM_178902.3 | Mus musculus mitochondrial tumor suppressor 1 (Mtus1), mRNA.                                                               |
| scl098766.1    | 292-S | 326.9279 | 47.01  | Ubadc1        | NM_133835.1 | Mus musculus ubiquitin associated domain containing 1 (Ubadc1), mRNA.                                                      |
| scl069082.11   | 146-S | 326.0119 | 7.67   | 2610312B22Rik | NM_026934.2 | Mus musculus RIKEN cDNA 2610312B22 gene (2610312B22Rik), mRNA.                                                             |
| scl35703.13    | 436-S | 324.5334 | 54.22  | Map2k1        | NM_008927.1 | Mus musculus mitogen activated protein kinase kinase 1 (Map2k1), mRNA.                                                     |
| scl38757.5.1   | 81-S  | 324.099  | 2.48   | Ndg2          | NM_175329.3 |                                                                                                                            |
| scl36650.13.1  | 185-S | 323.1563 | 10.24  | Bckdhb        | NM_199195.1 | Mus musculus branched chain ketoacid dehydrogenase E1, beta polypeptide (Bckdhb), mRNA.                                    |
| scl36089.6     | 17-S  | 321.0375 | 40.56  | 2310075A12Rik | NM_178027.3 |                                                                                                                            |
| scl030931.1    | 245-S | 321.0271 | 5.46   | Dyt1          | NM_144884.1 | Mus musculus dystonia 1 (Dyt1), mRNA.                                                                                      |
| scl31746.2.26  | 98-S  | 317.7933 | 9.3    | 1500016L11Rik | NM_026885.1 | Mus musculus RIKEN cDNA 1500016L11 gene (1500016L11Rik), mRNA.                                                             |
| scl43053.27.1  | 6-S   | 317.5293 | 37.45  | Gphn          | NM_172952.1 | Mus musculus gephyrin (Gphn), mRNA.                                                                                        |
| scl098256.13   | 10-S  | 317.3327 | 9.2    | Kmo           | NM_133809.1 | Mus musculus kynurenine 3-monooxygenase (kynurenine 3-hydroxylase) (Kmo), mRNA.                                            |
| scl00319154.1  | 299-S | 316.9737 | 16.05  | Hist2h3b      | NM_178215   | Mus musculus histone 2, H3b (Hist2h3b), mRNA.                                                                              |
| scl0001121.1   | 1-S   | 313.9537 | 49.86  | Ndufa5        | NM_026614.1 | Mus musculus NADH dehydrogenase (ubiquinone) 1 alpha subcomplex, 5 (Ndufa5), mRNA.                                         |
| scl0002995.1   | 2-S   | 313.3164 | 38.39  | Hprt          | NM_013556.1 | Mus musculus hypoxanthine guanine phosphoribosyl transferase (Hprt), mRNA.                                                 |
| GI_6671508-S   |       | 310.7679 | 3.34   | Actb          | NM_007393.1 | Mus musculus actin, beta, cytoplasmic (Actb), mRNA.                                                                        |
| scl38222.21    | 67-S  | 310.0428 | 5.57   | Sash1         | NM_175155.3 |                                                                                                                            |
| scl54409.6     | 0-S   | 309.438  | 5.96   | Tcte1l        | NM_025975.3 | Mus musculus t-complex-associated-testis-expressed 1-like (Tcte1l), mRNA.                                                  |
| scl068098.1    | 43-S  | 307.6499 | 8.43   | Rchy1         | NM_026557.2 | Mus musculus ring finger and CHY zinc finger domain containing 1 (Rchy1), mRNA.                                            |
| scl014569.11   | 60-S  | 306.8387 | 15     | Gdi3          | NM_008112.2 | Mus musculus guanosine diphosphate (GDP) dissociation inhibitor 3 (Gdi3), mRNA.                                            |
| scl18614.9.1   | 72-S  | 303.6953 | 5.64   | Hao1          | NM_010403   | Mus musculus hydroxyacid oxidase 1, liver (Hao1), mRNA.                                                                    |
| scl0277333.1   | 280-S | 303.2733 | 11.28  | MGC68323      | NM_199472.1 | Mus musculus similar to glyceraldehyde-3-phosphate dehydrogenase (phosphorylating) (EC 1.2.1.12) - mouse (MGC68323), mRNA. |
| scl000567.1    | 25-S  | 303.1937 | 6.25   | Clcn3         | NM_007711.1 | Mus musculus chloride channel 3 (Clcn3), transcript variant a, mRNA.                                                       |
| scl068581.2    | 286-S | 301.7039 | 5.16   | 1110014C03Rik | NM_026775.2 | Mus musculus RIKEN cDNA 1110014C03 gene (1110014C03Rik), mRNA.                                                             |
| scl000011.1    | 73-S  | 301.0297 | 48.05  | Strn3         | NM_052973   | Mus musculus striatin, calmodulin binding protein 3 (Strn3), mRNA.                                                         |
| scl011964.1    | 274-S | 300.3117 | 5.65   | Atp6v1a1      | NM_007508.2 | Mus musculus ATPase, H+ transporting, V1 subunit A, isoform 1 (Atp6v1a1), mRNA.                                            |
| scl014571.1    | 22-S  | 297.0123 | 35.86  | Gpd2          | NM_010274.2 | Mus musculus glycerol phosphate dehydrogenase 2, mitochondrial (Gpd2), mRNA.                                               |
| scl069713.3    | 39-S  | 296.841  | 6.72   | Pin4          | XM_135990   | Mus musculus protein (peptidyl-prolyl cis/trans isomerase) NIMA-interacting, 4 (parvulin) (Pin4), mRNA.                    |
| scl0276770.1   | 104-S | 296.1648 | 3.57   | Eif5a         | NM_181582.2 | Mus musculus eukaryotic translation initiation factor 5A (Eif5a), mRNA.                                                    |
| scl29303.3.1   | 9-S   | 296.0498 | 2.67   | Shfdg1        | NM_009169.1 | Mus musculus split hand/foot deleted gene 1 (Shfdg1), mRNA.                                                                |
| scl015289.1    | 26-S  | 294.1043 | 296.52 | Hmgb1         | NM_010439.2 | Mus musculus high mobility group box 1 (Hmgb1), mRNA.                                                                      |
| scl053610.12   | 290-S | 293.4882 | 53.71  | Nono          | NM_023144.1 | Mus musculus non-POU-domain-containing, octamer binding protein (Nono), mRNA.                                              |
| scl47166.29.1  | 41-S  | 292.6075 | 8.01   | E430025E21Rik | NM_153548.2 | Mus musculus RIKEN cDNA E430025E21 gene (E430025E21Rik), mRNA.                                                             |
| scl37474.12.36 | 46-S  | 291.3305 | 16.21  | Cct2          | NM_007636.1 | Mus musculus chaperonin subunit 2 (beta) (Cct2), mRNA.                                                                     |
| scl066073.8    | 269-S | 291.2558 | 5.67   | 0610040B21Rik | NM_025334.2 | Mus musculus RIKEN cDNA 0610040B21 gene (0610040B21Rik), mRNA.                                                             |
| scl056330.3    | 4-S   | 289.6497 | 15.8   | Pdcd5         | NM_019746.2 | Mus musculus programmed cell death 5 (Pdcd5), mRNA.                                                                        |
| scl0056388.1   | 45-S  | 286.9483 | 20.14  | Cyp3a25       | NM_019792.1 | Mus musculus cytochrome P450, family 3, subfamily a, polypeptide 25 (Cyp3a25), mRNA.                                       |
| scl39118.3     | 388-S | 285.9748 | 9.24   | Perp          | NM_022032.1 | Mus musculus PERP, TP53 apoptosis effector (Perp), mRNA.                                                                   |
| scl026374.20   | 270-S | 285.6619 | 6.71   | C80879        | NM_011931   | Mus musculus expressed sequence C80879 (C80879), mRNA.                                                                     |
| scl081702.1    | 30-S  | 285.1045 | 34.83  | Ankrd17       | NM_198010.2 | Mus musculus ankyrin repeat domain 17 (Ankrd17), transcript variant 1, mRNA.                                               |
| scl0067089.2   | 186-S | 284.9155 | 31.81  | Psmc6         | NM_025959.2 | Mus musculus proteasome (prosome, macropain) 26S subunit, ATPase, 6 (Psmc6), mRNA.                                         |
| scl31133.10.1  | 10-S  | 284.5258 | 7.47   | Idh2          | NM_173011.1 | Mus musculus isocitrate dehydrogenase 2 (NADP+), mitochondrial (Idh2), mRNA.                                               |
| scl27683.19    | 361-S | 283.9397 | 5.7    | Srp72         | XM_132143.3 | Mus musculus signal recognition particle 72 (Srp72), mRNA.                                                                 |
| scl37402.3     | 73-S  | 282.4188 | 3.45   | Sas           | NM_025982   | Mus musculus sarcoma amplified sequence (Sas), mRNA.                                                                       |
| scl093692.3    | 322-S | 281.5071 | 14.94  | Glrx1         | NM_053108   | Mus musculus glutaredoxin 1 (thioltransferase) (Glrx1), mRNA.                                                              |

|                       |          |        |               |              |                                                                                                               |
|-----------------------|----------|--------|---------------|--------------|---------------------------------------------------------------------------------------------------------------|
| sci067530.3 0-S       | 279.4085 | 15.67  | Uqcrb         | NM_026219.1  | Mus musculus ubiquinol-cytochrome c reductase binding protein (Uqcrb), mRNA.                                  |
| sci069257.1 70-S      | 277.9359 | 10.03  | Eif2          | NM_023502.1  | Mus musculus E74-like factor 2 (Eif2), mRNA.                                                                  |
| sci25713.4.87 24-S    | 275.9263 | 4.4    | Chchd7        | NM_181391.1  |                                                                                                               |
| sci30629.5.1 26-S     | 275.0739 | 2.35   | Vkorc1        | NM_178600.2  | Mus musculus vitamin K epoxide reductase complex, subunit 1 (Vkorc1), mRNA.                                   |
| sci067345.15 210-S    | 274.8502 | 40.94  | 1700056O17Rik | NM_026101.2  | Mus musculus RIKEN cDNA 1700056O17 gene (1700056O17Rik), mRNA.                                                |
| sci51339.12 2-S       | 273.9232 | 5.8    | Fech          | NM_007998.3  | Mus musculus ferrochelatase (Fech), mRNA.                                                                     |
| sci017836.18 18-S     | 273.8591 | 22.36  | Mug1          | NM_008645.2  | Mus musculus murinoglobulin 1 (Mug1), mRNA.                                                                   |
| sci0023808.2 287-S    | 272.4559 | 21.52  | Ash2l         | NM_011791.1  | Mus musculus ash2 (absent, small, or homeotic)-like (Drosophila) (Ash2l), mRNA.                               |
| sci075705.2 53-S      | 271.6064 | 10.64  | Eif4b         | NM_145625.1  | Mus musculus eukaryotic translation initiation factor 4B (Eif4b), mRNA.                                       |
| sci00218442.1 227-S   | 269.9361 | 38.26  | A130038L21Rik | NM_172588.2  | Mus musculus RIKEN cDNA A130038L21 gene (A130038L21Rik), mRNA.                                                |
| sci026451.5 30-S      | 269.1502 | 2.24   | Rpl27a        | NM_011975.2  | Mus musculus ribosomal protein L27a (Rpl27a), mRNA.                                                           |
| sci0319195.6 117-S    | 268.358  | 2.82   | Rpl17         | NM_001002239 | Mus musculus ribosomal protein L17 (Rpl17), mRNA.                                                             |
| sci0230484.9 241-S    | 267.856  | 6.5    | Usp1          | NM_146144.2  | Mus musculus ubiquitin specific protease 1 (Usp1), mRNA.                                                      |
| sci000091.1 88-S      | 267.3836 | 3.27   | Phf10         | NM_024250.3  | Mus musculus RIKEN cDNA 1600012H06 gene (1600012H06Rik), mRNA.                                                |
| sci019946.1 13-S      | 266.7487 | 49.27  | Rpl30         | NM_009083.2  | Mus musculus ribosomal protein L30 (Rpl30), mRNA.                                                             |
| sci22246.19.1 4-S     | 265.7365 | 36.37  | Mccc1         | NM_023644.2  | Mus musculus methylcrotonyl-Coenzyme A carboxylase 1 (alpha) (Mccc1), mRNA.                                   |
| sci056275.3 18-S      | 265.1182 | 32.71  | Rbm14         | NM_019869.1  | Mus musculus RNA binding motif protein 14 (Rbm14), mRNA.                                                      |
| gi_30794511 ref NM 01 | 264.1065 | 59.11  | Hmbs          | NM_013551.1  | Mus musculus hydroxymethylbilane synthase (Hmbs), mRNA.                                                       |
| sci050850.17 73-S     | 263.7929 | 5.33   | Spg4          | NM_016962.1  | Mus musculus spastic paraplegia 4 homolog (human) (Spg4), mRNA.                                               |
| sci0001735.1 49-S     | 262.9908 | 2.21   | RPS18         | NM_011296.1  | Mus musculus ribosomal protein S18 (Rps18), mRNA.                                                             |
| sci21970.4.1 6-S      | 261.8288 | 4.37   | Mapbpip       | NM_031248.3  | Mus musculus mitogen activated protein binding protein interacting protein (Mapbpip), mRNA.                   |
| sci28865.3.1 49-S     | 261.4618 | 2.49   | Vamp8         | NM_016794.2  | Mus musculus vesicle-associated membrane protein 8 (Vamp8), mRNA.                                             |
| sci068028.3 20-S      | 260.5836 | 104.83 | 3110001N18Rik | NM_026517.1  | Mus musculus RIKEN cDNA 3110001N18 gene (3110001N18Rik), mRNA.                                                |
| sci18742.7 10-S       | 260.5248 | 5.77   | Slc30a4       | NM_011177.4  | Mus musculus solute carrier family 30 (zinc transporter), member 4 (Slc30a4), mRNA.                           |
| sci42361.4.1 12-S     | 260.2821 | 37.1   | 2810055F11Rik | NM_026038.1  | Mus musculus RIKEN cDNA 2810055F11 gene (2810055F11Rik), mRNA.                                                |
| sci0066660.1 237-S    | 259.2409 | 4.96   | 5730555F13Rik | NM_025690.1  | Mus musculus RIKEN cDNA 5730555F13 gene (5730555F13Rik), mRNA.                                                |
| sci0021969.2 46-S     | 258.9649 | 32.48  | Top1          | NM_009408.1  | Mus musculus topoisomerase (DNA) I (Top1), mRNA.                                                              |
| sci0050908.1 300-S    | 258.809  | 38.39  | C1s           | NM_144938.1  | Mus musculus complement component 1, s subcomponent (C1s), mRNA.                                              |
| sci067529.7 122-S     | 256.0323 | 45.76  | Fgfr1op2      | NM_026218.1  | Mus musculus FGFR1 oncogene partner 2 (Fgfr1op2), mRNA.                                                       |
| sci23236.14.1 102-S   | 255.8176 | 5.75   | 1700108L22Rik | NM_145988.1  | Mus musculus RIKEN cDNA 1700108L22 gene (1700108L22Rik), mRNA.                                                |
| sci013030.16 220-S    | 255.8056 | 3.18   | Ctsb          | NM_007798.1  | Mus musculus cathepsin B (Ctsb), mRNA.                                                                        |
| sci52776.8.1 198-S    | 254.2141 | 6.37   | Polr2g        | NM_026329.1  | Mus musculus polymerase (RNA) II (DNA directed) polypeptide G (Polr2g), mRNA.                                 |
| sci46593.3.1 27-S     | 253.4823 | 2.31   | Chchd1        | NM_025366.1  |                                                                                                               |
| sci014528.1 141-S     | 252.6571 | 3.03   | Gch1          | NM_008102.2  |                                                                                                               |
| sci19447.7.1 15-S     | 251.1485 | 92.74  | 2900010J23Rik | NM_175190.2  | Mus musculus RIKEN cDNA 2900010J23 gene (2900010J23Rik), mRNA.                                                |
| sci37771.20 206-S     | 250.6793 | 4.07   | Agpat3        | NM_053014.2  | Mus musculus 1-acylglycerol-3-phosphate O-acyltransferase 3 (Agpat3), mRNA.                                   |
| sci017449.1 1-S       | 250.4982 | 23.26  | Mdh1          | NM_008618.2  | Mus musculus malate dehydrogenase 1, NAD (soluble) (Mdh1), mRNA.                                              |
| sci21187.1.18 12-S    | 249.5795 | 5.02   | C730025P13Rik | NM_177344    | Mus musculus RIKEN cDNA C730025P13 gene (C730025P13Rik), mRNA.                                                |
| sci078294.3 16-S      | 247.6458 | 2.15   | Rps27a        | NM_024277    | Mus musculus ribosomal protein S27a (Rps27a), mRNA.                                                           |
| sci53474.8.1 75-S     | 247.3119 | 2.17   | Ccs           | NM_016892.2  | Mus musculus copper chaperone for superoxide dismutase (Ccs), mRNA.                                           |
| sci48140.10 39-S      | 247.1328 | 9.51   | Sepp1         | NM_009155.2  | Mus musculus selenoprotein P, plasma, 1 (Sepp1), mRNA.                                                        |
| sci49219.13 574-S     | 246.6437 | 33.97  | Osbpl11       | NM_176840.2  | Mus musculus oxysterol binding protein-like 11 (Osbpl11), mRNA.                                               |
| sci014828.8 22-S      | 245.8875 | 63.2   | Hspa5         | NM_022310.2  | Mus musculus heat shock 70kD protein 5 (glucose-regulated protein) (Hspa5), mRNA.                             |
| sci0027050.1 101-S    | 244.9384 | 6.01   | Rps3          | NM_012052.1  | Mus musculus ribosomal protein S3 (Rps3), mRNA.                                                               |
| sci0067673.1 322-S    | 244.8039 | 2.53   | Tceb2         | NM_026305.1  | Mus musculus transcription elongation factor B (SIII), polypeptide 2 (Tceb2), mRNA.                           |
| sci020918.4 11-S      | 243.7597 | 6.67   | Sui1-rs1      | NM_011508    | Mus musculus suppressor of initiator codon mutations, related sequence 1 (S. cerevisiae) (Sui1-rs1), mRNA.    |
| sci0378702.3 30-S     | 242.2302 | 2.27   | Serf2         | NM_011354.1  | Mus musculus small EDRK-rich factor 2 (Serf2), mRNA.                                                          |
| sci067371.1 2-S       | 241.8995 | 29.42  | 2410016F19Rik | NM_026113.2  | Mus musculus RIKEN cDNA 2410016F19 gene (2410016F19Rik), mRNA.                                                |
| sci0016341.1 91-S     | 240.4897 | 29.9   | Eif3s6        | NM_008388.1  | Mus musculus eukaryotic translation initiation factor 3, subunit 6 (Eif3s6), mRNA.                            |
| sci51111.10.24 9-S    | 238.821  | 2.29   | Tcp1          | NM_013686.1  | Mus musculus t-complex protein 1 (Tcp1), mRNA.                                                                |
| sci000395.1 15-S      | 237.7921 | 4.86   | Adk           | NM_134079    | Mus musculus adenosine kinase (Adk), mRNA.                                                                    |
| sci012757.9 180-S     | 237.4521 | 11.53  | Cita          | NM_016760.1  | Mus musculus clathrin, light polypeptide (Lca) (Cita), mRNA.                                                  |
| sci0380773.4 2-S      | 236.8167 | 9.07   | 1810035L17Rik | XM_354684.1  |                                                                                                               |
| sci0026908.1 233-S    | 236.4382 | 5.31   | Eif2s3y       | NM_012011.1  | Mus musculus eukaryotic translation initiation factor 2, subunit 3, structural gene Y-linked (Eif2s3y), mRNA. |
| sci074255.2 27-S      | 236.1406 | 65.14  | Smu1          | NM_021535.2  |                                                                                                               |
| sci059048.1 115-S     | 235.1742 | 3.98   | 1500002I11Rik | NM_021550.2  | Mus musculus RIKEN cDNA 1500002I11 gene (1500002I11Rik), mRNA.                                                |

|                  |       |          |        |               |             |                                                                                                                                               |
|------------------|-------|----------|--------|---------------|-------------|-----------------------------------------------------------------------------------------------------------------------------------------------|
| scl41130.3.1     | 26-S  | 235.0674 | 7.53   | 1100001G20Rik | NM_183249.1 | Mus musculus RIKEN cDNA 1100001G20 gene (1100001G20Rik), mRNA.                                                                                |
| scl40580.5.1     | 111-S | 234.5948 | 2.1    | 1110020P15Rik | NM_197979.1 | Mus musculus RIKEN cDNA 1110020P15 gene (1110020P15Rik), mRNA.                                                                                |
| scl067067.1      | 49-S  | 233.7093 | 2.27   | 2010100O12Rik | NM_025946.2 | Mus musculus RIKEN cDNA 2010100O12 gene (2010100O12Rik), mRNA.                                                                                |
| scl17096.10      | 189-S | 233.6774 | 3.11   | Bpnt1         | NM_011794.2 | Mus musculus bisphosphate 3-nucleotidase 1 (Bpnt1), mRNA.                                                                                     |
| scl00107371.2    | 186-S | 233.452  | 14.35  | Sec15h1       | NM_175353.1 |                                                                                                                                               |
| scl017938.7      | 45-S  | 233.3289 | 8.7    | Naca          | NM_013608.2 | Mus musculus nascent polypeptide-associated complex alpha polypeptide (Naca), mRNA.                                                           |
| scl00232449.2    | 167-S | 232.4242 | 8.63   | 2500002K03Rik | NM_172733.1 | Mus musculus RIKEN cDNA 2500002K03 gene (2500002K03Rik), mRNA.                                                                                |
| scl00353208.1    | 64-S  | 231.9539 | 12.55  | 2810021G02Rik |             |                                                                                                                                               |
| scl066609.1      | 124-S | 231.8053 | 22.06  | Cryz1l        | NM_133679.1 | Mus musculus crystallin, zeta (quinone reductase)-like 1 (Cryz1l), mRNA.                                                                      |
| scl36203.11      | 30-S  | 231.1927 | 8.43   | 4931406C07Rik | NM_133732.1 | Mus musculus RIKEN cDNA 4931406C07 gene (4931406C07Rik), mRNA.                                                                                |
| scl065019.1      | 21-S  | 231.1595 | 2.08   | Rpl23         | NM_022891.1 | Mus musculus ribosomal protein L23 (Rpl23), mRNA.                                                                                             |
| scl00320611.1    | 109-S | 230.9861 | 7.44   | 9230101K24Rik | NM_177206   | Mus musculus RIKEN cDNA 9230101K24 gene (9230101K24Rik), mRNA.                                                                                |
| scl020044.5      | 19-S  | 230.8979 | 2.08   | Rps14         | NM_020600.2 | Mus musculus ribosomal protein S14 (Rps14), mRNA.                                                                                             |
| scl39652.23.1463 | 24-S  | 230.3463 | 17.91  | Kpnb1         | NM_008379.2 | Mus musculus karyopherin (importin) beta 1 (Kpnb1), mRNA.                                                                                     |
| scl47913.6       | 530-S | 230.2826 | 6.96   | LOC239447     | NM_173422.1 | Mus musculus collectin liver 1 (LOC239447), mRNA.                                                                                             |
| scl076654.7      | 194-S | 230.1278 | 3.24   | Upp2          | NM_029692.1 | Mus musculus uridine phosphorylase 2 (Upp2), mRNA.                                                                                            |
| scl000154.1      | 82-S  | 229.0593 | 2.91   | Bccip         | NM_025392   | Mus musculus BRCA2 and CDKN1A interacting protein (Bccip), mRNA.                                                                              |
| scl32136.14.1    | 5-S   | 228.3251 | 61.86  | Bucs1         | NM_054094.4 | Mus musculus butyryl Coenzyme A synthetase 1 (Bucs1), mRNA.                                                                                   |
| scl15766.4.1     | 27-S  | 227.0694 | 4.27   | 1110060M21Rik | NM_025424.1 | Mus musculus RIKEN cDNA 1110060M21 gene (1110060M21Rik), mRNA.                                                                                |
| scl000397.1      | 19-S  | 226.7668 | 38.18  | 2400006A19Rik | NM_025550.2 | Mus musculus RIKEN cDNA 2400006A19 gene (2400006A19Rik), mRNA.                                                                                |
| scl012868.2      | 102-S | 226.6568 | 2.9    | Cox8a         | NM_007750.1 | Mus musculus cytochrome c oxidase, subunit VIIIa (Cox8a), mRNA.                                                                               |
| scl0056307.2     | 142-S | 226.5171 | 8.95   | Metap2        | NM_019648.2 | Mus musculus methionine aminopeptidase 2 (Metap2), mRNA.                                                                                      |
| scl53834.2       | 155-S | 226.0363 | 2.79   | Timm8a        | NM_013898.1 | Mus musculus translocase of inner mitochondrial membrane 8 homolog a (yeast) (Timm8a), mRNA.                                                  |
| scl48956.26      | 1-S   | 225.8694 | 25.7   | Usp25         | NM_013918.2 | Mus musculus ubiquitin specific protease 25 (Usp25), mRNA.                                                                                    |
| scl019983.8      | 15-S  | 225.6989 | 2.34   | Rpl5          | NM_016980.1 | Mus musculus ribosomal protein L5 (Rpl5), mRNA.                                                                                               |
| scl17393.13.1    | 260-S | 225.5108 | 2.51   | F13b          | NM_031164   | Mus musculus coagulation factor XIII, beta subunit (F13b), mRNA.                                                                              |
| scl0051810.1     | 209-S | 225.0924 | 7.91   | Hnrpu         | NM_016805.1 | Mus musculus heterogeneous nuclear ribonucleoprotein U (Hnrpu), mRNA.                                                                         |
| scl079555.6      | 1-S   | 225.0538 | 3.9    | BC005537      | NM_024473.2 | Mus musculus cDNA sequence BC005537 (BC005537), mRNA.                                                                                         |
| scl0019191.1     | 143-S | 224.6878 | 3.81   | Psme2b        | NM_011191.1 | Mus musculus protease (prosome, macropain) 28 subunit, beta, b (Psme2b), mRNA.                                                                |
| scl012520.7      | 274-S | 224.2821 | 2.07   | Cd81          | NM_133655.1 | Mus musculus CD 81 antigen (Cd81), mRNA.                                                                                                      |
| scl093739.4      | 24-S  | 223.8067 | 32.78  | Gabarapl2     | NM_026693.2 | Mus musculus GABA(A) receptor-associated protein like 2 (Gabarapl2), mRNA.                                                                    |
| scl0068194.2     | 330-S | 223.7576 | 108.82 | Ndufb4        | NM_026610.1 | Mus musculus NADH dehydrogenase (ubiquinone) 1 beta subcomplex 4 (Ndufb4), mRNA.                                                              |
| scl35560.5       | 28-S  | 222.6532 | 3.38   | Cox7a2        | NM_009945.2 | Mus musculus cytochrome c oxidase, subunit VIIa 2 (Cox7a2), mRNA.                                                                             |
| scl0017993.1     | 168-S | 222.3183 | 2.98   | Ndufs4        | NM_010887.1 | Mus musculus NADH dehydrogenase (ubiquinone) Fe-S protein 4 (Ndufs4), mRNA.                                                                   |
| scl0057296.1     | 256-S | 222.0758 | 5.39   | Psm8          | NM_026545.1 | Mus musculus proteasome (prosome, macropain) 26S subunit, non-ATPase, 8 (Psm8), mRNA.                                                         |
| scl42463.7.1     | 1-S   | 221.2828 | 13.55  | 1810011O16Rik | NM_025456.2 | Mus musculus RIKEN cDNA 1810011O16 gene (1810011O16Rik), mRNA.                                                                                |
| scl30362.8.2     | 277-S | 221.1585 | 5.59   | Kdt1          | NM_175088.2 | Mus musculus kidney cell line derived transcript 1 (Kdt1), mRNA.                                                                              |
| scl066361.1      | 72-S  | 220.625  | 19.99  | 2310008M20Rik | NM_025512.2 | Mus musculus RIKEN cDNA 2310008M20 gene (2310008M20Rik), mRNA.                                                                                |
| scl0232087.1     | 5-S   | 220.25   | 7.71   | Mat2a         | NM_145569   | Mus musculus methionine adenosyltransferase II, alpha (Mat2a), mRNA.                                                                          |
| scl39096.7.1     | 9-S   | 220.2193 | 25.07  | Aldh8a1       | NM_178713.3 | Mus musculus aldehyde dehydrogenase 8 family, member A1 (Aldh8a1), mRNA.                                                                      |
| scl075617.3      | 32-S  | 219.7798 | 2.05   | Rps25         | NM_024266   | Mus musculus ribosomal protein S25 (Rps25), mRNA.                                                                                             |
| scl54548.7.1     | 64-S  | 219.7003 | 2.5    | Hadh2         | NM_016763.1 | Mus musculus hydroxyacyl-Coenzyme A dehydrogenase type II (Hadh2), mRNA.                                                                      |
| scl27687.10.1    | 4-S   | 219.5598 | 7.22   | Paics         | NM_025939.2 | Mus musculus phosphoribosylaminoimidazole carboxylase, phosphoribosylaminoribosylaminoimidazole, succinocarboxamide synthetase (Paics), mRNA. |
| scl019384.7      | 7-S   | 219.1941 | 2.19   | Ran           | NM_009391.2 | Mus musculus RAN, member RAS oncogene family (Ran), mRNA.                                                                                     |
| scl016971.1      | 277-S | 218.5725 | 34.75  | Lrp1          | NM_008512.1 | Mus musculus low density lipoprotein receptor-related protein 1 (Lrp1), mRNA.                                                                 |
| scl0020511.2     | 152-S | 218.0085 | 4.18   | Slc1a2        | NM_011393.1 | Mus musculus solute carrier family 1 (glial high affinity glutamate transporter), member 2 (Slc1a2), mRNA.                                    |
| scl0013171.2     | 124-S | 217.9673 | 25.74  | Dbt           | NM_010022.1 | Mus musculus dihydrolipoamide branched chain transacylase E2 (Dbt), mRNA.                                                                     |
| scl17803.10.1    | 30-S  | 216.3663 | 3.62   | Arpc2         | XM_129773.5 | Mus musculus actin related protein 2/3 complex, subunit 2 (Arpc2), mRNA.                                                                      |
| scl0050790.1     | 147-S | 216.2081 | 17.52  | Acs14         | NM_207625.1 | Mus musculus acyl-CoA synthetase long-chain family member 4 (Acs14), transcript variant 2, mRNA.                                              |
| scl019068.1      | 323-S | 215.5632 | 2.14   | Erh           | NM_007951.1 | Mus musculus enhancer of rudimentary homolog (Drosophila) (Erh), mRNA.                                                                        |
| scl41579.7       | 169-S | 215.358  | 2.08   | Ppp2ca        | NM_019411.2 | Mus musculus protein phosphatase 2a, catalytic subunit, alpha isoform (Ppp2ca), mRNA.                                                         |
| scl069178.1      | 5-S   | 214.8096 | 30.15  | Snx5          | NM_024225.2 | Mus musculus sorting nexin 5 (Snx5), mRNA.                                                                                                    |
| scl0002306.1     | 28-S  | 214.6447 | 18.84  | XM_283061.1   |             | Mus musculus RIKEN cDNA A630086P08 gene (A630086P08Rik), mRNA.                                                                                |
| scl41251.8       | 435-S | 214.5173 | 37.32  | Ywhae         | NM_009536.2 | Mus musculus tyrosine 3-monooxygenase/tryptophan 5-monooxygenase activation protein, epsilon polypeptide (Ywhae), mRNA.                       |
| scl067869.4      | 264-S | 212.568  | 12.01  | Paip2         | NM_026420.1 | Mus musculus polyadenylate-binding protein-interacting protein 2 (Paip2), mRNA.                                                               |
| scl16633.10.1    | 180-S | 212.461  | 9.87   | Pecr          | NM_023523.3 | Mus musculus peroxisomal trans-2-enoyl-CoA reductase (Pecr), mRNA.                                                                            |

|                     |          |        |               |             |                                                                                                                 |
|---------------------|----------|--------|---------------|-------------|-----------------------------------------------------------------------------------------------------------------|
| scI31237.29 375-S   | 212.4424 | 28.29  | Tjp1          | NM_009386.1 | Mus musculus tight junction protein 1 (Tjp1), mRNA.                                                             |
| scI24338.5.1 130-S  | 211.8285 | 10.24  | Baat          | NM_007519   | Mus musculus bile acid-Coenzyme A: amino acid N-acyltransferase (Baat), mRNA.                                   |
| scI019933.5 3-S     | 211.6415 | 27.36  | Rpl21         | NM_019647.3 | Mus musculus ribosomal protein L21 (Rpl21), mRNA.                                                               |
| scI29623.5 373-S    | 211.578  | 27.78  | Vh1h          | NM_009507   | Mus musculus von Hippel-Lindau syndrome homolog (Vh1h), mRNA.                                                   |
| scI000794.1 5-S     | 211.5096 | 8.59   | Tsn           | NM_011650.2 | Mus musculus translin (Tsn), mRNA.                                                                              |
| scI42333.3 174-S    | 211.0549 | 4.95   | Sgpp1         | NM_030750.2 | Mus musculus sphingosine-1-phosphate phosphatase 1 (Sgpp1), mRNA.                                               |
| scI056771.4 27-S    | 210.7219 | 30.42  | Usp49         | NM_020048.2 | Mus musculus ubiquitin specific protease 49 (Usp49), mRNA.                                                      |
| scI23219.3 221-S    | 209.8    | 5      | Rab33b        | NM_016858.1 | Mus musculus RAB33B, member of RAS oncogene family (Rab33b), mRNA.                                              |
| scI067912.2 23-S    | 209.6971 | 3.41   | 1600012H06Rik | NM_026451.1 | Mus musculus RIKEN cDNA 1600012H06 gene (1600012H06Rik), mRNA.                                                  |
| scI47100.1.18 67-S  | 209.3599 | 5.25   | Pt1pb         | NM_023587   | Mus musculus protein tyrosine phosphatase-like (proline instead of catalytic arginine), member b (Pt1pb), mRNA. |
| scI019941.2 3-S     | 209.2068 | 3.03   | Rpl26         | NM_009080   | Mus musculus ribosomal protein L26 (Rpl26), mRNA.                                                               |
| scI0054683.2 242-S  | 208.4302 | 2.79   | Prdx5         | NM_012021.1 | Mus musculus peroxiredoxin 5 (Prdx5), mRNA.                                                                     |
| scI068052.3 30-S    | 208.2953 | 2.12   | Rps13         | NM_026533   | Mus musculus ribosomal protein S13 (Rps13), mRNA.                                                               |
| scI0021761.2 320-S  | 208.0904 | 23.59  | Morf41i       | NM_024431   | Mus musculus mortality factor 4 like 1 (Morf41i), mRNA.                                                         |
| scI012867.3 17-S    | 208.0499 | 2.11   | Cox7c         | NM_007749.1 | Mus musculus cytochrome c oxidase, subunit VIIc (Cox7c), mRNA.                                                  |
| scI26699.18.1 4-S   | 207.9101 | 6.08   | 2610033H07Rik | NM_029278.1 | Mus musculus RIKEN cDNA 2610033H07 gene (2610033H07Rik), mRNA.                                                  |
| scI38976.4.1 15-S   | 207.5169 | 12.6   | Snx3          | NM_017472.2 | Mus musculus sorting nexin 3 (Snx3), mRNA.                                                                      |
| scI018458.3 17-S    | 207.4557 | 3.38   | Pabpc1        | NM_008774.2 | Mus musculus poly A binding protein, cytoplasmic 1 (Pabpc1), mRNA.                                              |
| scI19885.7 41-S     | 206.8535 | 4.03   | Zfp313        | NM_030743.3 | Mus musculus zinc finger protein 313 (Zfp313), mRNA.                                                            |
| scI056456.15 85-S   | 206.8049 | 8.86   | Act16a        | NM_019673.1 |                                                                                                                 |
| scI47786.6.1 30-S   | 205.8073 | 4.5    | 2310010G13Rik | NM_027122.2 | Mus musculus RIKEN cDNA 2310010G13 gene (2310010G13Rik), mRNA.                                                  |
| scI25301.1.41 0-S   | 205.582  | 7.8    | Rraga         | NM_178376.2 | Mus musculus Ras-related GTP binding A (Rraga), mRNA.                                                           |
| scI35945.10 223-S   | 205.4275 | 8.28   | Arctn1        | NM_145985.2 | Mus musculus archain 1 (Arctn1), mRNA.                                                                          |
| scI20689.4.1 4-S    | 205.2742 | 2.85   | Timm13a       | NM_013899.1 | Mus musculus translocase of inner mitochondrial membrane 13 homolog a (yeast) (Timm13a), mRNA.                  |
| scI0018534.2 230-S  | 203.897  | 15.43  | Pck1          | NM_011044.1 | Mus musculus phosphoenolpyruvate carboxylase 1, cytosolic (Pck1), mRNA.                                         |
| scI53077.5.8 20-S   | 203.6767 | 2.17   | Gsto1         | NM_010362.1 | Mus musculus glutathione S-transferase omega 1 (Gsto1), mRNA.                                                   |
| scI0003437.1 0-S    | 203.5309 | 1.97   | Rplp1         | NM_018853.1 | Mus musculus ribosomal protein, large, P1 (Rplp1), mRNA.                                                        |
| scI54996.3 58-S     | 203.3252 | 7.2    | Pgrmc1        | NM_016783.2 | Mus musculus progesterone receptor membrane component 1 (Pgrmc1), mRNA.                                         |
| scI017991.2 1-S     | 203.2114 | 2      | Ndufa2        | NM_010885.2 | Mus musculus NADH dehydrogenase (ubiquinone) 1 alpha subcomplex, 2 (Ndufa2), mRNA.                              |
| scI51664.18.1 87-S  | 202.856  | 6.24   | Usp14         | NM_021522.2 | Mus musculus ubiquitin specific protease 14 (Usp14), mRNA.                                                      |
| scI50010.18.1 105-S | 202.1028 | 7.48   | H2-Bf         | NM_008198.1 | Mus musculus histocompatibility 2, complement component factor B (H2-Bf), mRNA.                                 |
| scI056748.8 105-S   | 201.5013 | 7.08   | Hirip5        | NM_020045.1 | Mus musculus histone cell cycle regulation defective interacting protein 5 (Hirip5), mRNA.                      |
| scI38589.13.1 14-S  | 201.3432 | 5.83   | Pah           | NM_008777.1 | Mus musculus phenylalanine hydroxylase (Pah), mRNA.                                                             |
| scI16469.4.1 83-S   | 198.9714 | 2.04   | 1110002M09Rik | XM_129957.1 | Mus musculus RIKEN cDNA 1110002M09 gene (1110002M09Rik), mRNA.                                                  |
| scI056043.1 7-S     | 198.7379 | 9.6    | Akr1e1        | NM_018859.1 | Mus musculus aldo-keto reductase family 1, member E1 (Akr1e1), mRNA.                                            |
| scI067106.7 0-S     | 198.7334 | 57.89  | Arch          | NM_025970.1 | Mus musculus archease (Arch), mRNA.                                                                             |
| scI0015040.1 90-S   | 198.1948 | 2.61   | H2-T23        | NM_010398.1 | Mus musculus histocompatibility 2, T region locus 23 (H2-T23), mRNA.                                            |
| scI20479.1.60 10-S  | 198.0971 | 2.66   | Nola3         | NM_025403.1 | Mus musculus nucleolar protein family A, member 3 (Nola3), mRNA.                                                |
| scI0066671.2 25-S   | 197.9092 | 3.69   | Ccnh          | NM_023243.2 | Mus musculus cyclin H (Ccnh), mRNA.                                                                             |
| scI054127.2 67-S    | 197.4222 | 2.54   | Rps28         | NM_016844.1 | Mus musculus ribosomal protein S28 (Rps28), mRNA.                                                               |
| scI056438.5 27-S    | 197.3712 | 2.58   | Rbx1          | NM_019712.2 | Mus musculus ring-box 1 (Rbx1), mRNA.                                                                           |
| scI55022.8.1 12-S   | 197.3585 | 53.6   | Rgn           | NM_009060.1 | Mus musculus regucalcin (Rgn), mRNA.                                                                            |
| scI017274.8 92-S    | 196.7946 | 26.14  | Rab8a         | NM_023126.2 | Mus musculus RAB8A, member RAS oncogene family (Rab8a), mRNA.                                                   |
| scI00320541.1 138-S | 196.4998 | 7.84   | A530082C11Rik | NM_177186.3 | Mus musculus RIKEN cDNA A530082C11 gene (A530082C11Rik), mRNA.                                                  |
| scI17443.8 550-S    | 195.4851 | 3.89   | Arl10b        | NM_026823.1 |                                                                                                                 |
| scI22593.9.1 1-S    | 194.9876 | 5.02   | 1110013G13Rik | NM_146141   | Mus musculus RIKEN cDNA 1110013G13 gene (1110013G13Rik), mRNA.                                                  |
| scI014227.3 23-S    | 194.6484 | 2.14   | Fkbp2         | NM_008020.2 | Mus musculus FK506 binding protein 2 (Fkbp2), mRNA.                                                             |
| scI47326.13.2 27-S  | 193.9876 | 118.71 | Cct5          | NM_007637.1 | Mus musculus chaperonin subunit 5 (epsilon) (Cct5), mRNA.                                                       |
| scI012385.18 225-S  | 193.8731 | 2      | Catna1        | NM_009818.1 | Mus musculus catenin alpha 1 (Catna1), mRNA.                                                                    |
| scI46570.12.1 20-S  | 193.6189 | 2.36   | Vdac2         | NM_011695.1 | Mus musculus voltage-dependent anion channel 2 (Vdac2), mRNA.                                                   |
| scI013681.1 1-S     | 193.1396 | 2.23   | Eif4a1        | NM_144958.2 | Mus musculus eukaryotic translation initiation factor 4A1 (Eif4a1), mRNA.                                       |
| scI39022.13.1 2-S   | 193.115  | 3.56   | Hdac2         | NM_008229.1 | Mus musculus histone deacetylase 2 (Hdac2), mRNA.                                                               |
| scI34532.9 187-S    | 192.7618 | 4.57   | Dnaja2        | NM_019794.1 | Mus musculus DnaJ (Hsp40) homolog, subfamily A, member 2 (Dnaja2), mRNA.                                        |
| scI012583.1 32-S    | 192.7073 | 51.66  | Cdo1          | NM_033037.2 | Mus musculus cysteine dioxygenase 1, cytosolic (Cdo1), mRNA.                                                    |
| scI24787.5 386-S    | 192.2453 | 17.49  | 0610009K11Rik | NM_026689.3 | Mus musculus RIKEN cDNA 0610009K11 gene (0610009K11Rik), mRNA.                                                  |
| scI0237898.1 282-S  | 191.4813 | 5.2    | 6430526O11Rik | XM_110937.4 |                                                                                                                 |

|               |       |          |       |               |             |                                                                                                                        |
|---------------|-------|----------|-------|---------------|-------------|------------------------------------------------------------------------------------------------------------------------|
| scI0245867.4  | 1-S   | 191.0705 | 8.15  | 5330414D10Rik | NM_153594.2 | Mus musculus RIKEN cDNA 5330414D10 gene (5330414D10Rik), mRNA.                                                         |
| scI068908.1   | 119-S | 190.869  | 4.55  | 9130005N14Rik | NM_026667.2 | Mus musculus RIKEN cDNA 9130005N14 gene (9130005N14Rik), mRNA.                                                         |
| scI057294.3   | 33-S  | 190.6965 | 2.58  | Rps27         | NM_027015.1 | Mus musculus ribosomal protein S27 (Rps27), mRNA.                                                                      |
| scI0067171.2  | 285-S | 190.2539 | 4.3   | 2610318G18Rik | NM_026013.1 | Mus musculus RIKEN cDNA 2610318G18 gene (2610318G18Rik), mRNA.                                                         |
| scI33694.4.1  | 117-S | 190.0098 | 2.05  | Pgls          | NM_025396.1 | Mus musculus 6-phosphogluconolactonase (Pgls), mRNA.                                                                   |
| scI056398.7   | 324-S | 189.9005 | 3.35  | 1500003O03Rik | NM_019769.2 | Mus musculus RIKEN cDNA 1500003O03 gene (1500003O03Rik), mRNA.                                                         |
| scI23150.4.1  | 11-S  | 189.8021 | 36.55 | Aadac         | NM_023383.1 | Mus musculus arylacetamide deacetylase (esterase) (Aadac), mRNA.                                                       |
| scI0067096.2  | 233-S | 189.7091 | 6.14  | 1810037K07Rik | NM_025962.1 | Mus musculus RIKEN cDNA 1810037K07 gene (1810037K07Rik), mRNA.                                                         |
| scI00229096.1 | 119-S | 189.6624 | 4.26  | Ythdf3        | NM_172677.2 |                                                                                                                        |
| scI22677.22.1 | 1-S   | 189.6522 | 6.77  | Dpyd          | NM_170778.1 | Mus musculus dihydropyrimidine dehydrogenase (Dpyd), mRNA.                                                             |
| scI0002359.1  | 0-S   | 188.7937 | 39.39 | Pbef1         | NM_021524.1 | Mus musculus pre-B-cell colony-enhancing factor 1 (Pbef1), mRNA.                                                       |
| scI48200.7.1  | 9-S   | 188.2422 | 1.93  | Atp5o         | NM_138597   | Mus musculus ATP synthase, H+ transporting, mitochondrial F1 complex, O subunit (Atp5o), mRNA.                         |
| scI022327.6   | 246-S | 188.2009 | 5.21  | Vbp1          | NM_011692.1 | Mus musculus von Hippel-Lindau binding protein 1 (Vbp1), mRNA.                                                         |
| scI30202.10.1 | 68-S  | 187.0585 | 24.71 | Akr1d1        | NM_145364.1 | Mus musculus aldo-keto reductase family 1, member D1 (Akr1d1), mRNA.                                                   |
| scI0004148.1  | 17-S  | 187.0092 | 22.95 | Lias          | NM_024471.2 | Mus musculus lipoic acid synthetase (Lias), mRNA.                                                                      |
| scI31910.9.1  | 52-S  | 186.2139 | 1.99  | Cyp2e1        | NM_021282.1 | Mus musculus cytochrome P450, family 2, subfamily e, polypeptide 1 (Cyp2e1), mRNA.                                     |
| scI0109077.2  | 328-S | 185.9648 | 3.9   | 1110055N21Rik | NM_176843   | Mus musculus RIKEN cDNA 1110055N21 gene (1110055N21Rik), mRNA.                                                         |
| scI29636.20.1 | 18-S  | 185.5126 | 3.56  | 1110061O04Rik | NM_026849   | Mus musculus RIKEN cDNA 1110061O04 gene (1110061O04Rik), mRNA.                                                         |
| scI0015473.1  | 93-S  | 184.8444 | 18.35 | Hrsp12        | NM_008287.2 | Mus musculus heat-responsive protein 12 (Hrsp12), mRNA.                                                                |
| scI47892.24   | 470-S | 184.3647 | 4.89  | D15Ert621e    | NM_145959.1 |                                                                                                                        |
| scI0001436.1  | 98-S  | 183.7651 | 4.36  | Commd1        | NM_144514.1 | Mus musculus COMM domain containing 1 (Commd1), mRNA.                                                                  |
| scI068730.1   | 55-S  | 183.4534 | 2.47  | 1110032N12Rik | NM_026824.2 | Mus musculus RIKEN cDNA 1110032N12 gene (1110032N12Rik), mRNA.                                                         |
| scI36630.14.1 | 50-S  | 182.8342 | 2.08  | Ctsh          | NM_007801   | Mus musculus cathepsin H (Ctsh), mRNA.                                                                                 |
| scI0003600.1  | 3-S   | 182.7859 | 1.9   | MGC18837      | NM_178577.3 | Mus musculus hypothetical protein MGC18837 (MGC18837), mRNA.                                                           |
| scI074150.16  | 288-S | 182.7312 | 16.29 | Slc35f5       | NM_028787.2 | Mus musculus solute carrier family 35, member F5 (Slc35f5), mRNA.                                                      |
| scI0001621.1  | 13-S  | 182.7075 | 7.88  | Tcp1          | NM_013686   | Mus musculus t-complex protein 1 (Tcp1), mRNA.                                                                         |
| scI021357.9   | 262-S | 182.6836 | 3.45  | Tarbp2        | NM_009319   | Mus musculus TAR (HIV) RNA binding protein 2 (Tarbp2), mRNA.                                                           |
| scI00192657.1 | 320-S | 182.3967 | 8.27  | EiI2          | NM_138953.1 | Mus musculus elongation factor RNA polymerase II 2 (EiI2), mRNA.                                                       |
| scI19131.5.1  | 9-S   | 182.158  | 1.88  | Atp5g3        | NM_175015.1 | Mus musculus ATP synthase, H+ transporting, mitochondrial F0 complex, subunit c (subunit 9), isoform 3 (Atp5g3), mRNA. |
| scI43593.17   | 243-S | 181.6858 | 25.39 | Rad17         | NM_011233.1 | Mus musculus RAD17 homolog (S. pombe) (Rad17), mRNA.                                                                   |
| scI0056347.2  | 235-S | 181.4383 | 7.94  | Eif3s8        | NM_019646.1 | Mus musculus eukaryotic translation initiation factor 3, subunit 8 (Eif3s8), mRNA.                                     |
| scI015384.1   | 1-S   | 181.3234 | 1.95  | Hnrpab        | NM_010448.2 | Mus musculus heterogeneous nuclear ribonucleoprotein A/B (Hnrpab), mRNA.                                               |
| scI25927.13   | 1-S   | 181.1365 | 16.26 | Pom121        | NM_148932.1 | Mus musculus nuclear pore membrane protein 121 (Pom121), mRNA.                                                         |
| scI015528.3   | 20-S  | 180.7726 | 11.87 | Hspe1         | NM_008303.2 | Mus musculus heat shock protein 1 (chaperonin 10) (Hspe1), mRNA.                                                       |
| scI0099730.2  | 131-S | 180.6381 | 6.46  | Taf13         | NM_025444.1 | Mus musculus TAF13 RNA polymerase II, TATA box binding protein (TBP)-associated factor (Taf13), mRNA.                  |
| scI47755.2    | 19-S  | 178.7951 | 29.12 | H1f0          | NM_008197.2 | Mus musculus H1 histone family, member 0 (H1f0), mRNA.                                                                 |
| scI40782.12.1 | 32-S  | 178.2747 | 11.15 | Aph           | NM_013475.1 | Mus musculus apolipoprotein H (Aph), mRNA.                                                                             |
| scI014897.1   | 29-S  | 177.9799 | 60.2  | Trip12        | NM_133975.2 |                                                                                                                        |
| scI39554.8    | 358-S | 177.4547 | 2.69  | Rab5c         | NM_024456   | Mus musculus RAB5C, member RAS oncogene family (Rab5c), mRNA.                                                          |
| scI0017936.1  | 74-S  | 177.45   | 7.65  | Nab1          | NM_008667.2 | Mus musculus Ngfi-A binding protein 1 (Nab1), mRNA.                                                                    |
| scI52400.3.8  | 10-S  | 176.9056 | 13.88 | Arl3          | NM_019718.2 | Mus musculus ADP-ribosylation factor-like 3 (Arl3), mRNA.                                                              |
| scI056720.1   | 140-S | 176.5828 | 38.97 | Tdo2          | NM_019911.2 | Mus musculus tryptophan 2,3-dioxygenase (Tdo2), mRNA.                                                                  |
| scI067440.9   | 18-S  | 176.1384 | 6.6   | Papd1         | NM_026157.1 | Mus musculus PAP associated domain containing 1 (Papd1), mRNA.                                                         |
| scI094061.9   | 0-S   | 176.0607 | 11.68 | Mrpl1         | NM_053158.1 | Mus musculus mitochondrial ribosomal protein L1 (Mrpl1), mRNA.                                                         |
| scI25574.8.1  | 15-S  | 175.2792 | 8.88  | Ube2j1        | NM_019586.2 | Mus musculus ubiquitin-conjugating enzyme E2, J1 (Ube2j1), mRNA.                                                       |
| scI066489.3   | 56-S  | 174.9443 | 1.88  | Rpl35         | NM_025592   | Mus musculus ribosomal protein L35 (Rpl35), mRNA.                                                                      |
| scI0394430.5  | 296-S | 174.7052 | 28.12 | Ugt1a13       | NM_201641   |                                                                                                                        |
| scI51004.4    | 55-S  | 174.319  | 5.91  | Sepx1         | NM_013759.1 |                                                                                                                        |
| scI0268470.1  | 0-S   | 174.1059 | 32.41 | D11Moh35      | NM_172300   | Mus musculus DNA segment, Chr 11, KL Mohlke 35 (D11Moh35), mRNA.                                                       |
| scI0216705.9  | 38-S  | 173.6347 | 23.93 | Al642036      | XM_109767.2 | Mus musculus expressed sequence Al642036 (Al642036), mRNA.                                                             |
| scI54584.7    | 603-S | 173.0252 | 2.5   | Prps1         | NM_021463.2 | Mus musculus phosphoribosyl pyrophosphate synthetase 1 (Prps1), mRNA.                                                  |
| scI018102.1   | 15-S  | 172.9593 | 1.93  | Nme1          | NM_008704.2 | Mus musculus expressed in non-metastatic cells 1, protein (Nme1), mRNA.                                                |
| scI53400.8.1  | 51-S  | 172.1667 | 2.79  | D19Ert721e    | NM_146093.1 | Mus musculus DNA segment, Chr 19, ERATO Doi 721, expressed (D19Ert721e), mRNA.                                         |
| scI0064291.1  | 176-S | 172.1151 | 8.73  | Osbpl1a       | NM_020573.1 | Mus musculus oxysterol binding protein-like 1A (Osbpl1a), mRNA.                                                        |
| scI0002589.1  | 2-S   | 171.9854 | 2.18  | Eef1d         | NM_023240.1 | Mus musculus eukaryotic translation elongation factor 1 delta (guanine nucleotide exchange protein) (Eef1d), mRNA.     |
| scI54871.18   | 531-S | 171.9159 | 4.74  | Mtmr1         | NM_016988.1 | Mus musculus myotubularin related protein 1 (Mtmr1), mRNA.                                                             |



|               |        |          |        |               |             |                                                                                                                       |
|---------------|--------|----------|--------|---------------|-------------|-----------------------------------------------------------------------------------------------------------------------|
| scl0066881.2  | 144-S  | 171.8714 | 82.86  | Pcyox1        | NM_025823.3 | Mus musculus prenylcysteine oxidase 1 (Pcyox1), mRNA.                                                                 |
| scl51737.13.1 | 28-S   | 171.621  | 24.73  | Atp5a1        | NM_007505.1 | Mus musculus ATP synthase, H+ transporting, mitochondrial F1 complex, alpha subunit, isoform 1 (Atp5a1), mRNA.        |
| scl30187.2.1  | 182-S  | 171.1127 | 1.91   | 1110001J03Rik | NM_025363.2 | Mus musculus RIKEN cDNA 1110001J03 gene (1110001J03Rik), mRNA.                                                        |
| scl37617.5    | 6-S    | 171.0719 | 2.59   | Slc25a3       | NM_133668.2 | Mus musculus solute carrier family 25 (mitochondrial carrier; phosphate carrier), member 3 (Slc25a3), mRNA.           |
| scl32898.7.1  | 80-S   | 170.9051 | 3.51   | Blvrb         | NM_144923   | Mus musculus biliverdin reductase B (flavin reductase (NADPH)) (Blvrb), mRNA.                                         |
| scl54148.25   | 5-S    | 170.5107 | 4.45   | Hcfc1         | NM_008224.2 | Mus musculus host cell factor C1 (Hcfc1), mRNA.                                                                       |
| scl42971.1    | 9-S    | 170.5074 | 47.24  | 0710001C05Rik | XM_203592.1 | Mus musculus RIKEN cDNA 0710001C05 gene (0710001C05Rik), mRNA.                                                        |
| scl018744.1   | 4-S    | 170.1919 | 2.62   | Pja1          | NM_008853.1 | Mus musculus praja1, RING-H2 motif containing (Pja1), mRNA.                                                           |
| scl019175.6   | 47-S   | 169.5758 | 1.87   | Psmb6         | NM_008946   | Mus musculus proteasome (prosome, macropain) subunit, beta type 6 (Psmb6), mRNA.                                      |
| scl47063.13.1 | 72-S   | 169.5622 | 6.39   | Top1mt        | XM_128145.2 |                                                                                                                       |
| scl057423.2   | 11-S   | 169.5512 | 1.88   | Atp5j2        | NM_020582.1 | Mus musculus ATP synthase, H+ transporting, mitochondrial F0 complex, subunit f, isoform 2 (Atp5j2), mRNA.            |
| scl056351.11  | 60-S   | 169.4939 | 23.04  | Tebp          | NM_019766.2 | Mus musculus telomerase binding protein, p23 (Tebp), mRNA.                                                            |
| scl0002356.1  | 173-S  | 169.3857 | 2.95   | Sypl          | NM_198710.1 | Mus musculus synaptophysin-like protein (Sypl), transcript variant 1, mRNA.                                           |
| scl31959.7.1  | 44-S   | 169.138  | 1.98   | Bccip         | NM_025392.1 | Mus musculus BRCA2 and CDKN1A interacting protein (Bccip), mRNA.                                                      |
| scl022245.1   | 319-S  | 168.8761 | 3.14   | Uck1          | NM_011675.1 |                                                                                                                       |
| scl019047.11  | 32-S   | 168.3982 | 39.1   | Ppp1cc        | NM_013636.2 | Mus musculus protein phosphatase 1, catalytic subunit, gamma isoform (Ppp1cc), mRNA.                                  |
| scl030057.2   | 1-S    | 167.0058 | 1.94   | Timm8b        | NM_013897.1 | Mus musculus translocase of inner mitochondrial membrane 8 homolog b (yeast) (Timm8b), mRNA.                          |
| scl015024.2   | 236-S  | 166.7603 | 8.48   | H2-T10        | NM_010395.2 | Mus musculus histocompatibility 2, T region locus 10 (H2-T10), mRNA.                                                  |
| scl070544.3   | 53-S   | 166.655  | 2.31   | 5730437N04Rik | NM_027457.2 | Mus musculus RIKEN cDNA 5730437N04 gene (5730437N04Rik), mRNA.                                                        |
| scl011668.12  | 94-S   | 165.9671 | 5.88   | Aldh1a1       | NM_013467   | Mus musculus aldehyde dehydrogenase family 1, subfamily A1 (Aldh1a1), mRNA.                                           |
| scl020055.2   | 9-S    | 165.8618 | 1.84   | Rps16         | NM_013647.1 | Mus musculus ribosomal protein S16 (Rps16), mRNA.                                                                     |
| scl020729.4   | 276-S  | 165.5654 | 16.92  | Spin          | NM_011462   | Mus musculus spindlin (Spin), mRNA.                                                                                   |
| scl0019246.2  | 230-S  | 165.3762 | 7.54   | Ptpn1         | NM_011201.1 | Mus musculus protein tyrosine phosphatase, non-receptor type 1 (Ptpn1), mRNA.                                         |
| scl0002748.1  | 8-S    | 165.3067 | 1.97   | 1110060F11Rik | NM_026395.1 | Mus musculus RIKEN cDNA 1110060F11 gene (1110060F11Rik), mRNA.                                                        |
| scl066477.2   | 23-S   | 165.2128 | 132.35 | Usmg5         | XM_123431.1 | Mus musculus upregulated during skeletal muscle growth 5 (Usmg5), mRNA.                                               |
| scl32464.22.1 | 107-S  | 165.1463 | 2.77   | Pde8a         | NM_008803.1 | Mus musculus phosphodiesterase 8A (Pde8a), mRNA.                                                                      |
| scl015374.1   | 66-S   | 164.9824 | 5.93   | Hn1           | NM_008258.1 | Mus musculus hematological and neurological expressed sequence 1 (Hn1), mRNA.                                         |
| scl064657.6   | 146-S  | 164.9008 | 5.39   | Mrps10        | NM_183086   | Mus musculus mitochondrial ribosomal protein S10 (Mrps10), mRNA.                                                      |
| scl0001079.1  | 24-S   | 164.7236 | 3.25   | Vamp8         | NM_016794.2 | Mus musculus vesicle-associated membrane protein 8 (Vamp8), mRNA.                                                     |
| scl21503.2.1  | 16-S   | 164.5607 | 6.14   | Hadhsc        | NM_008212.1 | Mus musculus L-3-hydroxyacyl-Coenzyme A dehydrogenase, short chain (Hadhsc), mRNA.                                    |
| scl020090.2   | 29-S   | 164.4984 | 1.81   | Rps29         | NM_009093.1 | Mus musculus ribosomal protein S29 (Rps29), mRNA.                                                                     |
| scl28571.9    | 1-S    | 164.4616 | 27.86  | Sumf1         | NM_145937.1 |                                                                                                                       |
| scl027370.3   | 85-S   | 164.3755 | 1.83   | Rps26         | NM_013765   | Mus musculus ribosomal protein S26 (Rps26), mRNA.                                                                     |
| scl0004113.1  | 27-S   | 164.2819 | 1.9    | Mrp133        | NM_025796.1 | Mus musculus mitochondrial ribosomal protein L33 (Mrp133), mRNA.                                                      |
| scl48128.6    | 4-S    | 164.1115 | 28.54  | 2900001O04Rik | NM_026213.2 | Mus musculus RIKEN cDNA 2900001O04 gene (2900001O04Rik), mRNA.                                                        |
| scl50229.6.1  | 24-S   | 164.1044 | 2.04   | Tceb2         | NM_026305.1 | Mus musculus transcription elongation factor B (SIII), polypeptide 2 (Tceb2), mRNA.                                   |
| scl54331.2.4  | 4-S    | 163.7939 | 1.85   | Ndufa1        | NM_019443.1 | Mus musculus NADH dehydrogenase (ubiquinone) 1 alpha subcomplex, 1 (Ndufa1), mRNA.                                    |
| scl022666.6   | 141-S  | 163.7727 | 14.56  | Zfp161        | NM_009547.2 | Mus musculus zinc finger protein 161 (Zfp161), mRNA.                                                                  |
| scl066680.1   | 207-S  | 163.6089 | 40.67  | 3230401D17Rik | NM_025699.2 | Mus musculus RIKEN cDNA 3230401D17 gene (3230401D17Rik), mRNA.                                                        |
| scl056298.1   | 121-S  | 163.4343 | 12.79  | Arl6ip2       | NM_178050.2 | Mus musculus ADP-ribosylation factor-like 6 interacting protein 2 (Arl6ip2), mRNA.                                    |
| scl022630.1   | 91-S   | 163.2347 | 3.99   | Ywhaq         | NM_011739   | Mus musculus tyrosine 3-monooxygenase/tryptophan 5-monooxygenase activation protein, theta polypeptide (Ywhaq), mRNA. |
| scl012861.2   | 54-S   | 163.1149 | 2.18   | Cox6a1        | NM_007748.2 | Mus musculus cytochrome c oxidase, subunit VI a, polypeptide 1 (Cox6a1), mRNA.                                        |
| scl054381.6   | 56-S   | 163.084  | 2.99   | Pgcp          | NM_176073.2 | Mus musculus plasma glutamate carboxypeptidase (Pgcp), mRNA.                                                          |
| scl38900.29.1 | 38-S   | 162.8649 | 7.59   | Ranbp2        | NM_011240.2 | Mus musculus RAN binding protein 2 (Ranbp2), mRNA.                                                                    |
| scl066218.3   | 27-S   | 162.1077 | 24.38  | Ndufb9        | NM_023172.2 | Mus musculus NADH dehydrogenase (ubiquinone) 1 beta subcomplex, 9 (Ndufb9), mRNA.                                     |
| scl23508.1.1  | 311-S  | 161.8813 | 3.89   | Kif1b         | NM_207682.1 | Mus musculus kinesin family member 1B (Kif1b), transcript variant 1, mRNA.                                            |
| scl0011797.2  | 322-S  | 161.7823 | 25.81  | Birc2         | NM_007465.1 | Mus musculus baculoviral IAP repeat-containing 2 (Birc2), mRNA.                                                       |
| scl013204.1   | 302-S  | 161.181  | 3.05   | Dhx15         | NM_007839.1 | Mus musculus DEAH (Asp-Glu-Ala-His) box polypeptide 15 (Dhx15), mRNA.                                                 |
| scl53453.19   | 390-S  | 161.173  | 23.71  | Adrbk1        | NM_130863   | Mus musculus adrenergic receptor kinase, beta 1 (Adrbk1), mRNA.                                                       |
| scl017904.3   | 16-S   | 161.1016 | 2.75   | Myl6          | NM_010860   | Mus musculus myosin, light polypeptide 6, alkali, smooth muscle and non-muscle (Myl6), mRNA.                          |
| scl0192174.7  | 133-S  | 160.3723 | 22.28  | BC016198      | NM_203507.1 | Mus musculus cDNA sequence BC016198 (BC016198), mRNA.                                                                 |
| scl0003824.1  | 1258-S | 160.354  | 2.17   | Igf1          | NM_184052.1 | Mus musculus insulin-like growth factor 1 (Igf1), mRNA.                                                               |
| scl0001148.1  | 50-S   | 159.8422 | 4.52   | Ing4          | NM_133345.1 | Mus musculus inhibitor of growth family, member 4 (Ing4), mRNA.                                                       |
| scl020104.1   | 26-S   | 159.5483 | 56.94  | Rps6          | NM_009096.1 | Mus musculus ribosomal protein S6 (Rps6), mRNA.                                                                       |
| scl0002537.1  | 7-S    | 159.3891 | 2.18   | Pfdn5         | NM_020031.1 | Mus musculus prefoldin 5 (Pfdn5), mRNA.                                                                               |
| scl017330.5   | 48-S   | 159.163  | 3.7    | Minpp1        | NM_010799.1 | Mus musculus multiple inositol polyphosphate histidine phosphatase 1 (Minpp1), mRNA.                                  |

|                      |          |       |               |             |                                                                                                                                                                  |
|----------------------|----------|-------|---------------|-------------|------------------------------------------------------------------------------------------------------------------------------------------------------------------|
| sci00213541.2 318-S  | 159.094  | 7.89  | Ythdf2        | NM 145393.2 |                                                                                                                                                                  |
| sci20381.3.1 57-S    | 158.5169 | 1.87  | 2310003F16Rik | NM 026318.1 | Mus musculus RIKEN cDNA 2310003F16 gene (2310003F16Rik), mRNA.                                                                                                   |
| sci23736.8.1 149-S   | 157.8082 | 65.31 | 1110007F05Rik | XM 355561.1 | Mus musculus RIKEN cDNA 1110007F05 gene (1110007F05Rik), mRNA.                                                                                                   |
| sci06046.6 22-S      | 157.6024 | 19.32 | Ndufb5        | NM 025316.2 | Mus musculus NADH dehydrogenase (ubiquinone) 1 beta subcomplex, 5 (Ndufb5), mRNA.                                                                                |
| sci26992.46 0-S      | 157.3337 | 29.59 | AI481500      | NM 133901.1 | Mus musculus expressed sequence AI481500 (AI481500), mRNA.                                                                                                       |
| sci44322.14.1 14-S   | 157.1661 | 4.86  | 4833420G17Rik | NM 026127.3 | Mus musculus RIKEN cDNA 4833420G17 gene (4833420G17Rik), mRNA.                                                                                                   |
| sci020102.3 1-S      | 157.0176 | 2.16  | Rps4x         | NM 009094   | Mus musculus ribosomal protein S4, X-linked (Rps4x), mRNA.                                                                                                       |
| sci29755.18.1 293-S  | 156.7379 | 2.93  | BC022133      | NM 144940.1 | Mus musculus cDNA sequence BC022133 (BC022133), mRNA.                                                                                                            |
| sci0059042.1 160-S   | 156.6568 | 2.03  | Cope          | NM 021538.1 | Mus musculus coatamer protein complex, subunit epsilon (Cope), mRNA.                                                                                             |
| sci056724.5 33-S     | 156.4728 | 4.7   | 1200020A08Rik | NM 019936.1 | Mus musculus RIKEN cDNA 1200020A08 gene (1200020A08Rik), mRNA.                                                                                                   |
| sci26009.10.1 18-S   | 155.824  | 4.19  | Slc15a4       | NM 133895.1 | Mus musculus solute carrier family 15, member 4 (Slc15a4), mRNA.                                                                                                 |
| sci0094221.1 20-S    | 155.7843 | 16.76 | Gopc          | NM 053187.2 | Mus musculus golgi associated PDZ and coiled-coil motif containing (Gopc), mRNA.                                                                                 |
| sci093684.5 156-S    | 155.6032 | 51.6  | 39340         | NM 053102.1 | Mus musculus selenoprotein (Sep15), mRNA.                                                                                                                        |
| sci24858.5.1 216-S   | 155.1856 | 4.97  | AI838661      | NM 133884.1 | Mus musculus expressed sequence AI838661 (AI838661), mRNA.                                                                                                       |
| sci41358.1 245-S     | 155.0683 | 3.71  | 1810027O10Rik | XM 109683.4 | Mus musculus RIKEN cDNA 1810027O10 gene (1810027O10Rik), mRNA.                                                                                                   |
| sci0067549.1 327-S   | 154.4746 | 14.13 | Gpr89         | NM 026229.1 |                                                                                                                                                                  |
| sci0231086.16 205-S  | 154.3099 | 2.46  | Hadhb         | NM 145558.1 | Mus musculus hydroxyacyl-Coenzyme A dehydrogenase/3-ketoacyl-Coenzyme A thiolase/enoyl-Coenzyme A hydratase (trifunctional protein), beta subunit (Hadhb), mRNA. |
| sci53954.7 10-S      | 154.2499 | 24.1  | Slc16a2       | NM 009197.1 | Mus musculus solute carrier family 16 (monocarboxylic acid transporters), member 2 (Slc16a2), mRNA.                                                              |
| sci019921.5 131-S    | 154.1346 | 1.78  | Rpl19         | NM 009078   | Mus musculus ribosomal protein L19 (Rpl19), mRNA.                                                                                                                |
| sci0353187.1 56-S    | 154.112  | 33.02 | Nr1d2         | NM 011584.2 | Mus musculus nuclear receptor subfamily 1, group D, member 2 (Nr1d2), mRNA.                                                                                      |
| sci069786.2 30-S     | 152.9442 | 46.35 | 1810034M08Rik | NM 176842.2 | Mus musculus RIKEN cDNA 1810034M08 gene (1810034M08Rik), mRNA.                                                                                                   |
| sci0051788.1 274-S   | 152.4905 | 1.86  | H2afz         | NM 016750.1 | Mus musculus H2A histone family, member Z (H2afz), mRNA.                                                                                                         |
| sci0110960.1 77-S    | 152.4871 | 6.79  | Tars          | NM 033074.2 | Mus musculus threonyl-tRNA synthetase (Tars), mRNA.                                                                                                              |
| sci067414.12 0-S     | 152.437  | 1.9   | Mfn1          | NM 024200.2 | Mus musculus mitofusin 1 (Mfn1), mRNA.                                                                                                                           |
| sci0020704.1 175-S   | 152.4283 | 9.15  | Serpina1e     | NM 009247.1 | Mus musculus serine (or cysteine) proteinase inhibitor, clade A, member 1e (Serpina1e), mRNA.                                                                    |
| sci24344.15.1 2-S    | 152.393  | 10.49 | Txndc4        | NM 029572.1 | Mus musculus thioredoxin domain containing 4 (endoplasmic reticulum) (Txndc4), mRNA.                                                                             |
| sci018103.3 14-S     | 152.3898 | 1.79  | Nme2          | NM 008705.3 | Mus musculus expressed in non-metastatic cells 2, protein (Nme2), mRNA.                                                                                          |
| sci026901.3 41-S     | 151.885  | 1.99  | Deb1          | NM 026794.2 | Mus musculus differentially expressed in B16F10 1 (Deb1), mRNA.                                                                                                  |
| sci0030928.2 140-S   | 151.5433 | 6.21  | Zfp238        | NM 013915.1 | Mus musculus zinc finger protein 238 (Zfp238), mRNA.                                                                                                             |
| sci000389.1 0-S      | 150.664  | 3.27  | Ebpl          | NM 026598.1 | Mus musculus emopamil binding protein-like (Ebpl), mRNA.                                                                                                         |
| sci064660.1 30-S     | 150.61   | 1.78  | Mrps24        | NM 026080.1 | Mus musculus mitochondrial ribosomal protein S24 (Mrps24), mRNA.                                                                                                 |
| sci48261.13.240 30-S | 150.2811 | 2.31  | Cct8          | NM 009840.2 | Mus musculus chaperonin subunit 8 (theta) (Cct8), mRNA.                                                                                                          |
| sci097820.1 227-S    | 150.1602 | 2.25  | 4833439L19Rik | NM 133797   | Mus musculus RIKEN cDNA 4833439L19 gene (4833439L19Rik), mRNA.                                                                                                   |
| sci29381.10.1 63-S   | 149.5917 | 2.54  | Cmas          | NM 009908.1 | Mus musculus cytidine monophospho-N-acetylneuraminic acid synthetase (Cmas), mRNA.                                                                               |
| sci00243382.2 254-S  | 149.3607 | 3.91  | A930026L03Rik | NM 175523.2 | Mus musculus RIKEN cDNA A930026L03 gene (A930026L03Rik), mRNA.                                                                                                   |
| sci020973.4 189-S    | 149.1647 | 3.97  | Syng2         | NM 009304.1 | Mus musculus synaptogyrin 2 (Syng2), mRNA.                                                                                                                       |
| sci15890.11.1 28-S   | 148.9019 | 14.25 | Fh1           | NM 010209   | Mus musculus fumarate hydratase 1 (Fh1), mRNA.                                                                                                                   |
| sci0230789.1 243-S   | 148.7926 | 2.88  | BC008163      | NM 145553.1 | Mus musculus cDNA sequence BC008163 (BC008163), mRNA.                                                                                                            |
| sci40538.6.1 45-S    | 148.5656 | 2.32  | H2afv         | XM 126043.3 |                                                                                                                                                                  |
| sci0003853.1 11-S    | 148.0312 | 13.88 | Lta4h         | NM 008517.1 | Mus musculus leukotriene A4 hydrolase (Lta4h), mRNA.                                                                                                             |
| sci067281.3 0-S      | 147.7694 | 1.75  | Rpl37         | NM 026069.1 | Mus musculus ribosomal protein L37 (Rpl37), mRNA.                                                                                                                |
| sci36624.10.1 0-S    | 147.5892 | 5.66  | Plscr2        | NM 008880.2 | Mus musculus phospholipid scramblase 2 (Plscr2), mRNA.                                                                                                           |
| sci0020832.1 299-S   | 147.3481 | 1.79  | Ssr4          | NM 009279.1 | Mus musculus signal sequence receptor, delta (Ssr4), mRNA.                                                                                                       |
| sci0107141.5 21-S    | 147.1811 | 43.35 | Cyp2c50       | NM 134144   | Mus musculus cytochrome P450, family 2, subfamily c, polypeptide 50 (Cyp2c50), mRNA.                                                                             |
| sci0054673.1 296-S   | 147.0777 | 21.99 | Sh3glb1       | NM 019464.1 | Mus musculus SH3-domain GRB2-like B1 (endophilin) (Sh3glb1), mRNA.                                                                                               |
| sci50698.5 378-S     | 146.8267 | 10.73 | Enpp5         | NM 032003.1 | Mus musculus ectonucleotidic pyrophosphatase/phosphodiesterase 5 (Enpp5), mRNA.                                                                                  |
| sci38024.23.1 253-S  | 146.8111 | 12.16 | A530089117Rik | NM 133999.1 | Mus musculus RIKEN cDNA A530089117 gene (A530089117Rik), mRNA.                                                                                                   |
| GI 23592945-S        | 146.7989 | 1.8   | Eef1a1        | XM 134967.2 | Mus musculus eukaryotic translation elongation factor 1 alpha 1 (Eef1a1), mRNA.                                                                                  |
| sci011425.3 30-S     | 146.6244 | 2.01  | Apoc4         | NM 007385.2 | Mus musculus apolipoprotein C-IV (Apoc4), mRNA.                                                                                                                  |
| sci43293.5.1 3-S     | 146.6013 | 11.7  | Twistnb       | NM 172253.1 | Mus musculus TWIST neighbor (Twistnb), mRNA.                                                                                                                     |
| sci068135.3 22-S     | 146.5709 | 23.6  | Eif3s3        | NM 080635.1 | Mus musculus eukaryotic translation initiation factor 3, subunit 3 (gamma) (Eif3s3), mRNA.                                                                       |
| sci020384.11 30-S    | 146.1317 | 6.34  | Sirs5         | NM 009159   | Mus musculus splicing factor, arginine/serine-rich 5 (SRp40, HRS) (Sirs5), mRNA.                                                                                 |
| sci51843.7.3 62-S    | 145.8873 | 4.56  | 1810029G24Rik | NM 025468.1 | Mus musculus RIKEN cDNA 1810029G24 gene (1810029G24Rik), mRNA.                                                                                                   |
| sci023986.1 240-S    | 145.5839 | 28.55 | Peci          | NM 011868.1 | Mus musculus peroxisomal delta3, delta2-enoyl-Coenzyme A isomerase (Peci), mRNA.                                                                                 |
| sci50289.12.1 79-S   | 145.3249 | 2.32  | Phf10         | NM 024250.3 | Mus musculus PHD finger protein 10 (Phf10), mRNA.                                                                                                                |
| sci020826.1 68-S     | 144.5763 | 23    | Ssfa1         | XM 196564.2 | Mus musculus sperm specific antigen 1 (Ssfa1), mRNA.                                                                                                             |

|               |       |          |       |               |             |                                                                                                         |
|---------------|-------|----------|-------|---------------|-------------|---------------------------------------------------------------------------------------------------------|
| sci0021766.1  | 289-S | 144.565  | 3.52  | Tex261        | NM_009357.1 | Mus musculus testis expressed gene 261 (Tex261), mRNA.                                                  |
| sci070093.11  | 3-S   | 144.4982 | 2.91  | Ube2q         | NM_027315.2 |                                                                                                         |
| sci17336.3.1  | 84-S  | 144.4776 | 3.69  | 2810025M15Rik | NM_027274.2 | Mus musculus RIKEN cDNA 2810025M15 gene (2810025M15Rik), mRNA.                                          |
| sci00001.1    | 0-S   | 144.3809 | 27.48 | 2400010D15Rik | NM_029623.1 | Mus musculus RIKEN cDNA 2400010D15 gene (2400010D15Rik), mRNA.                                          |
| sci052898.2   | 0-S   | 144.0491 | 3.3   | D11Bwg0434e   | NM_173742.1 | Mus musculus DNA segment, Chr 11, Brigham & Womens Genetics 0434 expressed (D11Bwg0434e), mRNA.         |
| sci38628.18.8 | 108-S | 143.9689 | 50.27 | Txnrd1        | NM_015762.1 | Mus musculus thioredoxin reductase 1 (Txnrd1), mRNA.                                                    |
| sci0067427.2  | 328-S | 143.9246 | 1.75  | Rps20         | NM_026147.3 | Mus musculus ribosomal protein S20 (Rps20), mRNA.                                                       |
| sci066576.4   | 1-S   | 143.9102 | 2.06  | Uqcrh         | NM_025641.2 |                                                                                                         |
| sci00104570.2 | 297-S | 143.7999 | 3.81  | AW011752      | NM_134034.1 | Mus musculus expressed sequence AW011752 (AW011752), mRNA.                                              |
| sci0003877.1  | 0-S   | 143.7575 | 23.01 | Aldh8a1       | NM_178713   | Mus musculus aldehyde dehydrogenase 8 family, member A1 (Aldh8a1), mRNA.                                |
| sci49001.3    | 229-S | 143.1698 | 2.05  | Cggbp1        | NM_178647.2 | Mus musculus CGG triplet repeat binding protein 1 (Cggbp1), mRNA.                                       |
| sci068349.3   | 1-S   | 143.0438 | 1.89  | Ndufs3        | XM_130347.1 | Mus musculus NADH dehydrogenase (ubiquinone) Fe-S protein 3 (Ndufs3), mRNA.                             |
| sci022194.1   | 318-S | 142.9654 | 10.29 | Ube2e1        | NM_009455.2 | Mus musculus ubiquitin-conjugating enzyme E2E 1, UBC4/5 homolog (yeast) (Ube2e1), mRNA.                 |
| sci056529.1   | 95-S  | 142.7805 | 1.84  | Spc18         | NM_019951.1 | Mus musculus signal peptidase complex (Spc18), mRNA.                                                    |
| sci35488.3    | 0-S   | 142.7587 | 3.09  | Rnf7          | XM_135065.1 | Mus musculus ring finger protein 7 (Rnf7), mRNA.                                                        |
| sci0099650.1  | 60-S  | 142.7034 | 3.38  | 4933434E20Rik | NM_025762.1 | Mus musculus RIKEN cDNA 4933434E20 gene (4933434E20Rik), mRNA.                                          |
| sci011806.4   | 161-S | 142.6252 | 1.72  | Apoa1         | NM_009692.1 | Mus musculus apolipoprotein A-I (Apoa1), mRNA.                                                          |
| sci54681.4    | 59-S  | 142.6036 | 3.09  | Sh3bgrl       | NM_019989.2 | Mus musculus SH3-binding domain glutamic acid-rich protein like (Sh3bgrl), mRNA.                        |
| sci23666.9    | 53-S  | 142.177  | 1.8   | Lypla2        | NM_011942.1 | Mus musculus lysophospholipase 2 (Lypla2), mRNA.                                                        |
| sci011363.1   | 35-S  | 142.1475 | 9.77  | Acadl         | NM_007381.2 | Mus musculus acetyl-Coenzyme A dehydrogenase, long-chain (Acadl), mRNA.                                 |
| sci0002075.1  | 35-S  | 141.7597 | 12.37 | Fgg           | NM_133862.1 | Mus musculus fibrinogen, gamma polypeptide (Fgg), mRNA.                                                 |
| sci21209.20   | 282-S | 141.4516 | 4.37  | Yme11i        | NM_013771.2 | Mus musculus YME1-like 1 (S. cerevisiae) (Yme11i), mRNA.                                                |
| sci000022.1   | 12-S  | 141.3658 | 3.5   | Cpt2          | NM_009949   | Mus musculus carnitine palmitoyltransferase 2 (Cpt2), mRNA.                                             |
| sci47965.12.3 | 6-S   | 141.185  | 2.69  | Atp6v1c1      | NM_025494   | Mus musculus ATPase, H+ transporting, V1 subunit C, isoform 1 (Atp6v1c1), mRNA.                         |
| sci29411.4.6  | 15-S  | 141.026  | 3.11  | Mgst1         | NM_019946.3 | Mus musculus microsomal glutathione S-transferase 1 (Mgst1), mRNA.                                      |
| sci056248.1   | 79-S  | 140.8964 | 10.32 | Ak3l          | NM_021299.1 | Mus musculus adenylate kinase 3 alpha-like (Ak3l), mRNA.                                                |
| sci069077.10  | 34-S  | 140.5943 | 28.22 | Psmd11        | NM_178616.2 | Mus musculus proteasome (prosome, macropain) 26S subunit, non-ATPase, 11 (Psmd11), mRNA.                |
| sci0015016.1  | 231-S | 140.3435 | 3.96  | H2-Q5         | NM_010393.1 | Mus musculus histocompatibility 2, Q region locus 5 (H2-Q5), mRNA.                                      |
| sci0234875.1  | 259-S | 140.2592 | 2.07  | Ttc13         | XM_358379.1 |                                                                                                         |
| sci45932.17   | 232-S | 140.0715 | 20.44 | Tm9sf2        | NM_080556.2 | Mus musculus transmembrane 9 superfamily member 2 (Tm9sf2), mRNA.                                       |
| sci011532.9   | 123-S | 139.8895 | 69.62 | Adh5          | NM_007410.2 | Mus musculus alcohol dehydrogenase 5 (class III), chi polypeptide (Adh5), mRNA.                         |
| sci17783.10   | 25-S  | 139.8224 | 4.2   | BC038286      | NM_170755.1 | Mus musculus cDNA sequence BC038286 (BC038286), mRNA.                                                   |
| sci0001364.1  | 49-S  | 139.6967 | 1.73  | Ppia          | XM_122180.1 | Mus musculus peptidylprolyl isomerase A (Ppia), mRNA.                                                   |
| sci20221.14.1 | 27-S  | 139.2488 | 24.61 | 2310003L22Rik | NM_027093.1 | Mus musculus RIKEN cDNA 2310003L22 gene (2310003L22Rik), mRNA.                                          |
| sci000941.1   | 0-S   | 139.1501 | 2.67  | Ndufs2        | NM_153064.3 | Mus musculus NADH dehydrogenase (ubiquinone) Fe-S protein 2 (Ndufs2), mRNA.                             |
| sci00268490.1 | 147-S | 139.079  | 6.23  | 2600001B17Rik | NM_172947.1 |                                                                                                         |
| sci0223254.9  | 31-S  | 138.9522 | 2.87  | Farp1         |             | Mus musculus FERM, RhoGEF (Arhgef) and pleckstrin domain protein 1 (chondrocyte-derived) (Farp1), mRNA. |
| sci0002344.1  | 54-S  | 138.9404 | 1.71  | Serpina1b     | NM_009244.2 | Mus musculus serine (or cysteine) proteinase inhibitor, clade A, member 1b (Serpina1b), mRNA.           |
| sci28426.4.1  | 40-S  | 138.8875 | 4.29  | Grc2f         | NM_013536.1 | Mus musculus gene rich cluster, G2f gene (Grc2f), mRNA.                                                 |
| sci36332.17   | 16-S  | 138.3714 | 2.56  | Catnb         | NM_007614.2 | Mus musculus catenin beta (Catnb), mRNA.                                                                |
| sci47044.6.24 | 75-S  | 137.8896 | 2.8   | 0610041B22Rik | NM_025340.1 | Mus musculus RIKEN cDNA 0610041B22 gene (0610041B22Rik), mRNA.                                          |
| sci21986.3.1  | 30-S  | 137.602  | 2.75  | Apoa1bp       | NM_144897   | Mus musculus apolipoprotein A-I binding protein (Apoa1bp), mRNA.                                        |
| sci011737.7   | 8-S   | 137.5145 | 12.1  | Anp32a        | NM_009672.2 | Mus musculus acidic (leucine-rich) nuclear phosphoprotein 32 family, member A (Anp32a), mRNA.           |
| sci25160.11.1 | 73-S  | 137.2433 | 2.45  | C030002N13Rik | NM_145550.1 | Mus musculus RIKEN cDNA C030002N13 gene (C030002N13Rik), mRNA.                                          |
| sci018786.2   | 1-S   | 137.2222 | 3.26  | Plaa          | NM_172695.1 | Mus musculus phospholipase A2, activating protein (Plaa), mRNA.                                         |
| sci0002287.1  | 881-S | 137.0993 | 5.13  | D12Erd771e    | NM_028262.1 | Mus musculus DNA segment, Chr 12, ERATO Doi 771, expressed (D12Erd771e), mRNA.                          |
| sci018655.12  | 25-S  | 136.9326 | 2.11  | Pgk1          | NM_008828   | Mus musculus phosphoglycerate kinase 1 (Pgk1), mRNA.                                                    |
| sci40204.6.1  | 30-S  | 136.8272 | 1.75  | Atox1         | NM_009720.2 | Mus musculus ATX1 (antioxidant protein 1) homolog 1 (yeast) (Atox1), mRNA.                              |
| sci39338.3    | 4-S   | 136.7061 | 2.71  | Ni5c          | NM_015807.1 | Mus musculus 5,3-nucleotidase, cytosolic (Ni5c), mRNA.                                                  |
| sci0003990.1  | 13-S  | 135.9621 | 2.23  | Hip2          | NM_016786.2 | Mus musculus huntingtin interacting protein 2 (Hip2), mRNA.                                             |
| sci48385.2    | 92-S  | 135.931  | 3.37  | Rg9mid1       | NM_029092.1 | Mus musculus RNA (guanine-9-) methyltransferase domain containing 1 (Rg9mid1), mRNA.                    |
| sci0018472.1  | 99-S  | 135.6979 | 5.74  | Pafah1b1      | NM_013625.1 | Mus musculus platelet-activating factor acetylhydrolase, isoform 1b, beta1 subunit (Pafah1b1), mRNA.    |
| sci0015568.1  | 223-S | 135.3424 | 1.89  | Elavl1        | NM_010485.2 | Mus musculus ELAV (embryonic lethal, abnormal vision, Drosophila)-like 1 (Hu antigen R) (Elavl1), mRNA. |
| sci023994.4   | 204-S | 135.2242 | 2.8   | Dazap2        | NM_011873.2 | Mus musculus DAZ associated protein 2 (Dazap2), mRNA.                                                   |
| sci0002776.1  | 66-S  | 135.0748 | 1.94  | Eif3s2        | NM_018799   | Mus musculus eukaryotic translation initiation factor 3, subunit 2 (beta) (Eif3s2), mRNA.               |
| sci47732.2    | 4-S   | 135.0481 | 3.55  | Atf4          | XM_139474.1 | Mus musculus activating transcription factor 4 (Atf4), mRNA.                                            |

|                      |          |       |               |             |                                                                                              |
|----------------------|----------|-------|---------------|-------------|----------------------------------------------------------------------------------------------|
| scl23930.5.1 96-S    | 134.9271 | 2.05  | Atp6v0b       | NM_033617.1 | Mus musculus ATPase, H+ transporting, V0 subunit B (Atp6v0b), mRNA.                          |
| scl44185.3.1 24-S    | 134.81   | 63.18 | Them2         | NM_025790.1 | Mus musculus thioesterase superfamily member 2 (Them2), mRNA.                                |
| scl0066142.1 255-S   | 134.8036 | 26.11 | Cox7b         | NM_025379.1 | Mus musculus cytochrome c oxidase subunit VIIb (Cox7b), mRNA.                                |
| scl23478.14.23 30-S  | 134.773  | 1.72  | Park7         | NM_020569.1 | Mus musculus Parkinson disease (autosomal recessive, early onset) 7 (Park7), mRNA.           |
| scl027050.3 42-S     | 134.5845 | 1.73  | Rps3          | NM_012052.1 | Mus musculus ribosomal protein S3 (Rps3), mRNA.                                              |
| scl25152.5.1 78-S    | 134.5317 | 2.47  | Magoh         | NM_010760.1 | Mus musculus mago-nashi homolog, proliferation-associated (Drosophila) (Magoh), mRNA.        |
| scl36431.25.1 92-S   | 134.4012 | 2.37  | Scap          | XM_135190.4 | Mus musculus Sreb cleavage-activating protein (Scap), mRNA.                                  |
| scl32408.23 56-S     | 134.1222 | 25.73 | Picalm        | NM_146194   | Mus musculus phosphatidylinositol binding clathrin assembly protein (Picalm), mRNA.          |
| scl43155.10.40 7-S   | 134.1171 | 2.71  | Klhdc2        | NM_027117.1 | Mus musculus kelch domain containing 2 (Klhdc2), mRNA.                                       |
| scl24019.5 109-S     | 133.8132 | 1.87  | Cpt2          | NM_009949   | Mus musculus carnitine palmitoyltransferase 2 (Cpt2), mRNA.                                  |
| scl16202.3.56 30-S   | 133.803  | 36.58 | Cfh           | NM_009888.2 | Mus musculus complement component factor h (Cfh), mRNA.                                      |
| scl45457.5 178-S     | 133.677  | 8.12  | 6330409N04Rik | NM_025697.1 | Mus musculus RIKEN cDNA 6330409N04 gene (6330409N04Rik), mRNA.                               |
| scl24797.1 325-S     | 133.4853 | 6.28  | Usp48         | NM_028344.1 |                                                                                              |
| scl0020843.2 126-S   | 133.3416 | 17.37 | Stag2         | NM_021465.2 | Mus musculus stromal antigen 2 (Stag2), mRNA.                                                |
| scl030056.1 208-S    | 133.0351 | 2.01  | Timm10        | NM_013896.2 | Mus musculus translocase of inner mitochondrial membrane 10 homolog (yeast) (Timm10), mRNA.  |
| scl0012861.1 173-S   | 132.7867 | 2.26  | Cox6a1        | NM_007748.2 | Mus musculus cytochrome c oxidase, subunit VI a, polypeptide 1 (Cox6a1), mRNA.               |
| scl51769.42.1 6-S    | 132.6309 | 10.63 | Myc5b         | NM_201600.1 | Mus musculus myosin Vb (Myc5b), transcript variant 1, mRNA.                                  |
| scl0027407.2 308-S   | 131.7506 | 3.06  | Abcf2         | NM_013853.1 | Mus musculus ATP-binding cassette, sub-family F (GCN20), member 2 (Abcf2), mRNA.             |
| scl000287.1 1-S      | 131.6596 | 1.86  | A1043088      | NM_198613.1 | Mus musculus expressed sequence A1043088 (A1043088), mRNA.                                   |
| scl014619.1 28-S     | 131.6575 | 4.3   | Gjb2          | NM_008125.2 | Mus musculus gap junction membrane channel protein beta 2 (Gjb2), mRNA.                      |
| scl027419.6 267-S    | 131.5771 | 2.13  | Naglu         | NM_013792.1 | Mus musculus alpha-N-acetylglucosaminidase (Sanfilippo disease IIb) (Naglu), mRNA.           |
| scl23509.31 82-S     | 130.9359 | 1.93  | Ube4b         | NM_022022.1 | Mus musculus ubiquitination factor E4B, UFD2 homolog (S. cerevisiae) (Ube4b), mRNA.          |
| scl022187.2 0-S      | 130.576  | 1.78  | Ubb           | NM_011664.1 | Mus musculus ubiquitin B (Ubb), mRNA.                                                        |
| scl19959.12 665-S    | 130.4915 | 2.57  | Hnf4a         | NM_008261.2 |                                                                                              |
| scl44752.2.1 30-S    | 130.4167 | 1.71  | 2010110M21Rik | NM_025933.1 | Mus musculus RIKEN cDNA 2010110M21 gene (2010110M21Rik), mRNA.                               |
| scl0001345.1 85-S    | 130.0494 | 15.25 | XM_181312.3   |             | Mus musculus clathrin, heavy polypeptide (Hc) (Cltc), mRNA.                                  |
| scl013685.3 18-S     | 129.9886 | 1.74  | Eif4ebp1      | NM_007918.2 | Mus musculus eukaryotic translation initiation factor 4E binding protein 1 (Eif4ebp1), mRNA. |
| scl23015.4.5 22-S    | 129.7524 | 1.79  | Mrp124        | NM_026591.1 | Mus musculus mitochondrial ribosomal protein L24 (Mrp124), mRNA.                             |
| scl36067.18 4-S      | 129.7127 | 1.69  | Aplp2         | NM_009691.1 | Mus musculus amyloid beta (A4) precursor-like protein 2 (Aplp2), mRNA.                       |
| scl35445.15.1 13-S   | 129.6613 | 3.18  | Pccb          | NM_025835.1 | Mus musculus propionyl Coenzyme A carboxylase, beta polypeptide (Pccb), mRNA.                |
| scl011727.2 300-S    | 129.4298 | 22.97 | Ang1          | NM_007447   | Mus musculus angiogenin, ribonuclease A family, member 1 (Ang1), mRNA.                       |
| scl36472.2.242 20-S  | 129.4259 | 1.68  | Gpx1          | NM_008160.1 | Mus musculus glutathione peroxidase 1 (Gpx1), mRNA.                                          |
| scl52692.1 233-S     | 129.2072 | 3.14  | Eif4a1        | NM_144958   | Mus musculus eukaryotic translation initiation factor 4A1 (Eif4a1), mRNA.                    |
| scl0020750.1 112-S   | 128.9623 | 3.32  | Spp1          | NM_009263.1 | Mus musculus secreted phosphoprotein 1 (Spp1), mRNA.                                         |
| scl38085.1.103 16-S  | 128.7314 | 2.34  | Hint3         | NM_025798.2 |                                                                                              |
| scl37896.8 186-S     | 127.9328 | 14.3  | 2510003E04Rik | NM_028197.1 | Mus musculus RIKEN cDNA 2510003E04 gene (2510003E04Rik), mRNA.                               |
| scl0003100.1 18-S    | 127.9121 | 19.79 | 2310047O13Rik | NM_024185.3 | Mus musculus RIKEN cDNA 2310047O13 gene (2310047O13Rik), mRNA.                               |
| scl0017975.1 309-S   | 127.6514 | 4.18  | Ncl           | NM_010880.2 | Mus musculus nucleolin (Ncl), mRNA.                                                          |
| scl28312.12.1 12-S   | 127.407  | 4.51  | Csda          | NM_139117.1 | Mus musculus cold shock domain protein A (Csda), mRNA.                                       |
| scl00170791.1 106-S  | 127.1285 | 2.97  | Rnpc2         | NM_133242.1 | Mus musculus RNA-binding region (RNP1, RRM) containing 2 (Rnpc2), mRNA.                      |
| scl28129.1 67-S      | 126.8419 | 19.28 | Fzd1          | NM_021457.2 | Mus musculus frizzled homolog 1 (Drosophila) (Fzd1), mRNA.                                   |
| scl37183.6.1 31-S    | 126.4217 | 6.32  | Thy28         | NM_144543.1 | Mus musculus thymocyte protein thy28 (Thy28), mRNA.                                          |
| scl056404.1 12-S     | 125.9946 | 22.43 | Trip4         | NM_019797.2 | Mus musculus thyroid hormone receptor interactor 4 (Trip4), mRNA.                            |
| scl067267.4 0-S      | 125.9123 | 1.97  | 2900010M23Rik | NM_026063.1 | Mus musculus RIKEN cDNA 2900010M23 gene (2900010M23Rik), mRNA.                               |
| scl34743.1.1 137-S   | 125.8652 | 19.55 | BC003498      | NM_030263.2 | Mus musculus cDNA sequence BC003498 (BC003498), mRNA.                                        |
| scl0229096.2 166-S   | 125.699  | 19.36 | Ythdf3        | NM_172677.2 |                                                                                              |
| scl0015516.2 144-S   | 125.2907 | 1.91  | Hspcb         | NM_008302.2 | Mus musculus heat shock protein 1, beta (Hspcb), mRNA.                                       |
| scl28291.1 56-S      | 124.7476 | 6.83  | Tctex1        | NM_009342   | Mus musculus t-complex testis expressed 1 (Tctex1), mRNA.                                    |
| scl0003279.1 9-S     | 124.6896 | 2.37  | Dpm1          | NM_010072.2 | Mus musculus dolichol-phosphate (beta-D) mannosyltransferase 1 (Dpm1), mRNA.                 |
| scl0003286.1 154-S   | 124.4484 | 1.98  | Edf1          | NM_021519.1 | Mus musculus endothelial differentiation-related factor 1 (Edf1), mRNA.                      |
| scl30651.1 27-S      | 124.0108 | 1.78  | Seps2         | NM_009266.1 | Mus musculus selenophosphate synthetase 2 (Seps2), mRNA.                                     |
| scl23678.5.1 21-S    | 123.9561 | 2.24  | 3200001F09Rik | NM_027935.1 | Mus musculus RIKEN cDNA 3200001F09 gene (3200001F09Rik), mRNA.                               |
| scl015510.1 74-S     | 123.6325 | 2.47  | Hspd1         | NM_010477.2 | Mus musculus heat shock protein 1 (chaperonin) (Hspd1), mRNA.                                |
| scl066167.1 147-S    | 123.0888 | 22.85 | 1110017O22Rik | NM_183250.1 | Mus musculus RIKEN cDNA 1110017O22 gene (1110017O22Rik), mRNA.                               |
| scl0012934.1 152-S   | 123.0565 | 2.16  | Dpysl2        | NM_009955.2 | Mus musculus dihydropyrimidinase-like 2 (Dpysl2), mRNA.                                      |
| scl17120.3.641 166-S | 122.9721 | 4.3   | Srp9          | NM_012058.2 | Mus musculus signal recognition particle 9 (Srp9), mRNA.                                     |

|                 |       |          |       |               |             |                                                                                                                                 |
|-----------------|-------|----------|-------|---------------|-------------|---------------------------------------------------------------------------------------------------------------------------------|
| sc121916.1      | 21-S  | 122.9349 | 3.33  | S100a1        | NM_011309.2 | Mus musculus S100 calcium binding protein A1 (S100a1), mRNA.                                                                    |
| sc1014548.2     | 14-S  | 122.2921 | 1.9   | Mrps33        | NM_010270.1 | Mus musculus mitochondrial ribosomal protein S33 (Mrps33), mRNA.                                                                |
| sc147390.18.104 | 38-S  | 122.1836 | 36.11 | Tars          | NM_033074.2 | Mus musculus threonyl-tRNA synthetase (Tars), mRNA.                                                                             |
| sc10011308.2    | 118-S | 122.1369 | 2.24  | Abi1          | NM_007380.1 | Mus musculus abl-interactor 1 (Abi1), mRNA.                                                                                     |
| sc129045.3.1    | 38-S  | 121.8732 | 4.34  | Rarres2       | NM_027852.1 | Mus musculus retinoic acid receptor responder (tazarotene induced) 2 (Rarres2), mRNA.                                           |
| sc149065.9.1    | 50-S  | 121.7838 | 2.69  | App3l         | NM_026402.1 |                                                                                                                                 |
| sc134280.9.1    | 28-S  | 121.7473 | 20.59 | 2310061C15Rik | NM_026844.2 |                                                                                                                                 |
| sc134266.7      | 421-S | 121.5476 | 3.32  | 2700067E09Rik | NM_175185.2 | Mus musculus RIKEN cDNA 2700067E09 gene (2700067E09Rik), mRNA.                                                                  |
| sc10093762.1    | 285-S | 121.5281 | 23.77 | Smarca5       | NM_053124.2 | Mus musculus SWI/SNF related, matrix associated, actin dependent regulator of chromatin, subfamily a, member 5 (Smarca5), mRNA. |
| sc123946.8.1    | 41-S  | 121.4767 | 1.67  | Urod          | NM_009478.1 | Mus musculus uroporphyrinogen decarboxylase (Urod), mRNA.                                                                       |
| sc10001170.1    | 113-S | 121.3348 | 16.48 | Crbn          | NM_175357.1 |                                                                                                                                 |
| sc10098711.1    | 0-S   | 120.9426 | 3.54  | Rdh10         | NM_133832.2 | Mus musculus retinol dehydrogenase 10 (all-trans) (Rdh10), mRNA.                                                                |
| sc1052469.1     | 143-S | 120.6743 | 1.79  | D11Ert99e     | NM_026618.1 | Mus musculus DNA segment, Chr 11, ERATO Doi 99, expressed (D11Ert99e), mRNA.                                                    |
| sc10014933.2    | 154-S | 120.4834 | 2.38  | Gyk           | NM_008194   | Mus musculus glycerol kinase (Gyk), transcript variant 2, mRNA.                                                                 |
| sc151713.6.3    | 46-S  | 120.1373 | 1.64  | Cyb5          | NM_025797   | Mus musculus cytochrome b-5 (Cyb5), mRNA.                                                                                       |
| sc151927.6.1    | 20-S  | 119.4644 | 2.75  | Phax          | NM_019996.2 | Mus musculus phosphorylated adaptor for RNA export (Phax), mRNA.                                                                |
| sc130098.24.1   | 15-S  | 119.4635 | 2.92  | Cul1          | NM_012042.3 | Mus musculus cullin 1 (Cul1), mRNA.                                                                                             |
| sc1018789.3     | 4-S   | 119.4516 | 23.25 | Papola        | NM_011112.1 | Mus musculus poly (A) polymerase alpha (Papola), mRNA.                                                                          |
| sc10014567.2    | 263-S | 119.2308 | 2.06  | Gdi1          | NM_010273.1 | Mus musculus guanosine diphosphate (GDP) dissociation inhibitor 1 (Gdi1), mRNA.                                                 |
| sc129852.1      | 47-S  | 119.18   | 2.29  | Mrp153        | NM_026744.1 | Mus musculus mitochondrial ribosomal protein L53 (Mrp153), mRNA.                                                                |
| sc1028071.4     | 2-S   | 118.7323 | 19.83 | Twistnb       | NM_172253.1 | Mus musculus TWIST neighbor (Twistnb), mRNA.                                                                                    |
| sc10020955.2    | 50-S  | 118.7056 | 18.56 | Sybl1         | NM_011515.1 | Mus musculus synaptobrevin like 1 (Sybl1), mRNA.                                                                                |
| sc1017993.1     | 123-S | 118.6799 | 2.49  | Ndufs4        | NM_010887.1 | Mus musculus NADH dehydrogenase (ubiquinone) Fe-S protein 4 (Ndufs4), mRNA.                                                     |
| sc1058809.2     | 14-S  | 118.1805 | 4.11  | Rnase4        | NM_021472.1 | Mus musculus ribonuclease, RNase A family 4 (Rnase4), mRNA.                                                                     |
| sc10002504.1    | 31-S  | 118.1242 | 19.02 | Atf4          | NM_009716   | Mus musculus activating transcription factor 4 (Atf4), mRNA.                                                                    |
| sc137813.3.1    | 14-S  | 118.0442 | 10.2  | Ddt           | NM_010027.1 | Mus musculus D-dopachrome tautomerase (Ddt), mRNA.                                                                              |
| sc136930.15.1   | 0-S   | 118.0117 | 3.33  | 3010021M21Rik | NM_180600.1 | Mus musculus RIKEN cDNA 3010021M21 gene (3010021M21Rik), mRNA.                                                                  |
| sc1030963.1     | 56-S  | 118.0002 | 49.06 | Ptpla         | NM_013935.1 | Mus musculus protein tyrosine phosphatase-like (proline instead of catalytic arginine), member a (Ptpla), mRNA.                 |
| sc1000890.1     | 7-S   | 117.8697 | 27.34 | Apoa2         | NM_013474   | Mus musculus apolipoprotein A-II (Apoa2), mRNA.                                                                                 |
| sc1019981.2     | 48-S  | 117.8249 | 2.38  | Rpl37a        | NM_009084.2 | Mus musculus ribosomal protein L37a (Rpl37a), mRNA.                                                                             |
| sc1011807.2     | 4-S   | 117.2787 | 1.72  | Apoa2         | NM_013474.1 | Mus musculus apolipoprotein A-II (Apoa2), mRNA.                                                                                 |
| sc10027057.2    | 200-S | 117.2382 | 10.73 | Ncoa4         | NM_019744.1 | Mus musculus nuclear receptor coactivator 4 (Ncoa4), mRNA.                                                                      |
| sc1020813.1     | 157-S | 117.1587 | 1.82  | Srp14         | NM_009273.2 | Mus musculus signal recognition particle 14 (Srp14), mRNA.                                                                      |
| sc154843.2      | 132-S | 117.1099 | 1.65  | Ssr4          | NM_009279   | Mus musculus signal sequence receptor, delta (Ssr4), mRNA.                                                                      |
| sc148020.10.1   | 127-S | 116.9264 | 3.54  | 2310016A09Rik | NM_181588.2 | Mus musculus RIKEN cDNA 2310016A09 gene (2310016A09Rik), mRNA.                                                                  |
| sc10076890.1    | 96-S  | 116.7646 | 8.6   | 0610016J10Rik | NM_133771.1 | Mus musculus RIKEN cDNA 0610016J10 gene (0610016J10Rik), mRNA.                                                                  |
| sc1068195.1     | 129-S | 116.6964 | 1.63  | Rnaset2       | NM_026611.1 | Mus musculus ribonuclease T2 (Rnaset2), mRNA.                                                                                   |
| sc1067201.1     | 106-S | 116.5712 | 21.18 | 2700085E05Rik | NM_026029.1 | Mus musculus RIKEN cDNA 2700085E05 gene (2700085E05Rik), mRNA.                                                                  |
| sc1000492.1     | 58-S  | 116.5116 | 27.17 | Smbp          | NM_133352.1 | Mus musculus SM-11044 binding protein (Smbp), mRNA.                                                                             |
| sc136833.9.1    | 209-S | 116.47   | 6.14  | Rpl4          | NM_024212.2 | Mus musculus ribosomal protein L4 (Rpl4), mRNA.                                                                                 |
| sc1066359.2     | 17-S  | 116.4507 | 2.78  | 2310005N03Rik | NM_025511.1 | Mus musculus RIKEN cDNA 2310005N03 gene (2310005N03Rik), mRNA.                                                                  |
| sc10002714.1    | 31-S  | 116.3894 | 4.22  | Nipsnap3b     | NM_025623.1 | Mus musculus nipsnap homolog 3B (C. elegans) (Nipsnap3b), mRNA.                                                                 |
| sc1067671.4     | 8-S   | 116.3012 | 2.02  | Rpl38         | NM_023372.1 | Mus musculus ribosomal protein L38 (Rpl38), mRNA.                                                                               |
| sc1068177.1     | 35-S  | 116.2452 | 1.8   | Ebpl          | NM_026598.1 | Mus musculus emopamil binding protein-like (Ebpl), mRNA.                                                                        |
| sc10001502.1    | 0-S   | 116.1966 | 6.97  | Hspa4         | NM_008300.2 | Mus musculus heat shock protein 4 (Hspa4), mRNA.                                                                                |
| sc1012727.1     | 314-S | 116.101  | 15.61 | Clcn4-2       | NM_011334.2 | Mus musculus chloride channel 4-2 (Clcn4-2), mRNA.                                                                              |
| sc1022017.1     | 28-S  | 116.0971 | 3.9   | Tpmt          | NM_016785   | Mus musculus thiopurine methyltransferase (Tpmt), mRNA.                                                                         |
| sc10235043.1    | 144-S | 115.5335 | 1.76  | MGC18837      | NM_178577.3 |                                                                                                                                 |
| sc125250.2.1    | 9-S   | 115.4678 | 46.65 | Angptl3       | NM_013913.1 | Mus musculus angiopoietin-like 3 (Angptl3), mRNA.                                                                               |
| sc10002109.1    | 724-S | 115.3457 | 21.07 | Dnajb4        | NM_025926.1 | Mus musculus DnaJ (Hsp40) homolog, subfamily B, member 4 (Dnajb4), mRNA.                                                        |
| sc151125.19.1   | 152-S | 115.3056 | 2.51  | Plg           | NM_008877.2 | Mus musculus plasminogen (Plg), mRNA.                                                                                           |
| sc1068045.1     | 243-S | 115.304  | 1.64  | 2700060E02Rik | NM_026528.1 | Mus musculus RIKEN cDNA 2700060E02 gene (2700060E02Rik), mRNA.                                                                  |
| sc131056.12.1   | 57-S  | 115.2954 | 5.07  | Eed           | NM_021876.1 | Mus musculus embryonic ectoderm development (Eed), mRNA.                                                                        |
| sc1015481.10    | 184-S | 115.246  | 3.79  | Hspa8         | NM_031165   | Mus musculus heat shock protein 8 (Hspa8), mRNA.                                                                                |
| sc10102866.1    | 231-S | 115.2035 | 4.05  | Pls3          | NM_145629.1 | Mus musculus plastin 3 (T-isoform) (Pls3), mRNA.                                                                                |
| sc10268373.4    | 12-S  | 114.9135 | 1.63  | Ppia          | NM_008907   | Mus musculus peptidylprolyl isomerase A (Ppia), mRNA.                                                                           |

|                |       |          |       |               |             |                                                                                                               |
|----------------|-------|----------|-------|---------------|-------------|---------------------------------------------------------------------------------------------------------------|
| sci54430.4.1   | 35-S  | 114.8795 | 1.82  | Ebp           | NM_007898.2 | Mus musculus phenylalkylamine Ca2+ antagonist (emopamil) binding protein (Ebp), mRNA.                         |
| sci0015191.2   | 38-S  | 114.7939 | 1.9   | HdGF1         | NM_008231.2 | Mus musculus hepatoma-derived growth factor (HdGF1), mRNA.                                                    |
| sci29314.10.1  | 67-S  | 114.7519 | 1.7   | Pon1          | NM_011134.1 | Mus musculus paraoxonase 1 (Pon1), mRNA.                                                                      |
| sci011958.2    | 29-S  | 114.4457 | 57    | Atp5k         | NM_007507   | Mus musculus ATP synthase, H+ transporting, mitochondrial F1F0 complex, subunit e (Atp5k), mRNA.              |
| sci29872.10.1  | 133-S | 114.28   | 95.59 | Suclg1        | NM_019879.1 | Mus musculus succinate-CoA ligase, GDP-forming, alpha subunit (Suclg1), mRNA.                                 |
| sci0098314.1   | 111-S | 114.2686 | 18.36 | Ai325464      | NM_178882.2 | Mus musculus expressed sequence Ai325464 (Ai325464), mRNA.                                                    |
| sci24033.7.1   | 11-S  | 114.1212 | 1.73  | Mrp137        | NM_025500.1 | Mus musculus mitochondrial ribosomal protein L37 (Mrp137), mRNA.                                              |
| sci0067857.2   | 151-S | 113.9903 | 1.84  | Ppp6c         | NM_024209.1 | Mus musculus protein phosphatase 6, catalytic subunit (Ppp6c), mRNA.                                          |
| sci0066377.1   | 24-S  | 113.9836 | 1.71  | Ndufc1        | NM_025523.1 | Mus musculus NADH dehydrogenase (ubiquinone) 1, subcomplex unknown, 1 (Ndufc1), mRNA.                         |
| sci0019244.1   | 47-S  | 113.9319 | 2.06  | Ptp4a2        | NM_008974.2 | Mus musculus protein tyrosine phosphatase 4a2 (Ptp4a2), mRNA.                                                 |
| sci013909.6    | 35-S  | 113.8314 | 5.51  | LOC13909      | NM_144511.1 | Mus musculus esterase 31-like (LOC13909), mRNA.                                                               |
| sci068152.6    | 9-S   | 113.7815 | 6.33  | 5830415L20Rik | NM_026583.2 | Mus musculus RIKEN cDNA 5830415L20 gene (5830415L20Rik), mRNA.                                                |
| sci012864.3    | 58-S  | 113.488  | 2.67  | Cox6c         | NM_053071.1 | Mus musculus cytochrome c oxidase, subunit VIc (Cox6c), mRNA.                                                 |
| sci018412.1    | 16-S  | 113.4459 | 2.02  | Sqstm1        | NM_011018.1 | Mus musculus sequestosome 1 (Sqstm1), mRNA.                                                                   |
| sci0026442.1   | 315-S | 113.326  | 26.95 | Psm5          | NM_011967.1 | Mus musculus proteasome (prosome, macropain) subunit, alpha type 5 (Psm5), mRNA.                              |
| sci014470.4    | 28-S  | 113.2398 | 2.03  | Rabac1        | NM_010261.1 | Mus musculus Rab acceptor 1 (prenylated) (Rabac1), mRNA.                                                      |
| sci0027029.2   | 174-S | 113.2144 | 4.8   | Sgsh          | NM_018822.2 | Mus musculus N-sulfoglucosamine sulfohydrolase (sulfamidase) (Sgsh), mRNA.                                    |
| sci067673.2    | 0-S   | 113.1564 | 1.66  | Tceb2         | NM_026305.1 | Mus musculus transcription elongation factor B (SIII), polypeptide 2 (Tceb2), mRNA.                           |
| sci28216.21.1  | 39-S  | 113.1123 | 10.47 | Sox5          | NM_011444.1 | Mus musculus SRY-box containing gene 5 (Sox5), mRNA.                                                          |
| sci53438.9.1   | 79-S  | 113.0242 | 1.63  | Ndufv1        | NM_133666.1 | Mus musculus NADH dehydrogenase (ubiquinone) flavoprotein 1 (Ndufv1), mRNA.                                   |
| sci0002737.1   | 15-S  | 112.963  | 3.52  | Mrs15         | NM_025544.1 | Mus musculus mitochondrial ribosomal protein S15 (Mrs15), mRNA.                                               |
| sci51768.11.1  | 9-S   | 112.7917 | 1.9   | Acaa2         | NM_177470.2 | Mus musculus acetyl-Coenzyme A acyltransferase 2 (mitochondrial 3-oxoacyl-Coenzyme A thiolase) (Acaa2), mRNA. |
| sci46052.12.1  | 12-S  | 112.7718 | 36.49 | Sugt1         | NM_026474.2 | Mus musculus SGT1, suppressor of G2 allele of SKP1 (S. cerevisiae) (Sugt1), mRNA.                             |
| sci068365.1    | 71-S  | 112.7393 | 1.69  | Rab14         | NM_026697.2 | Mus musculus RAB14, member RAS oncogene family (Rab14), mRNA.                                                 |
| sci35194.5     | 5-S   | 112.6843 | 16.09 | Hig1          | NM_019814.2 | Mus musculus hypoxia induced gene 1 (Hig1), mRNA.                                                             |
| sci067945.1    | 102-S | 112.532  | 1.62  | Rpl41         | NM_018860.2 | Mus musculus ribosomal protein L41 (Rpl41), mRNA.                                                             |
| sci066390.1    | 295-S | 112.1549 | 1.67  | 2310042G06Rik | NM_025531.2 | Mus musculus RIKEN cDNA 2310042G06 gene (2310042G06Rik), mRNA.                                                |
| sci017113.8    | 48-S  | 112.01   | 2.15  | M6pr          | NM_010749.4 | Mus musculus mannose-6-phosphate receptor, cation dependent (M6pr), mRNA.                                     |
| sci27367.4.1   | 8-S   | 111.9313 | 1.83  | Pop5          | NM_026398.2 | Mus musculus processing of precursor 5, ribonuclease P/MRP family (S. cerevisiae) (Pop5), mRNA.               |
| sci25694.8.816 | 12-S  | 111.9223 | 1.66  | Rab2          | NM_021518.2 | Mus musculus RAB2, member RAS oncogene family (Rab2), mRNA.                                                   |
| sci24399.13    | 176-S | 111.9193 | 5.02  | Gba2          | NM_172692.1 | Mus musculus glucosidase beta 2 (Gba2), mRNA.                                                                 |
| sci34554.11.1  | 42-S  | 111.9156 | 15.56 | Gcdh          | NM_008097.1 | Mus musculus glutaryl-Coenzyme A dehydrogenase (Gcdh), mRNA.                                                  |
| sci45887.9.1   | 15-S  | 111.8421 | 11.98 | 2400006A19Rik | NM_025550.2 | Mus musculus RIKEN cDNA 2400006A19 gene (2400006A19Rik), mRNA.                                                |
| sci066383.5    | 131-S | 111.8416 | 1.74  | 2310020H20Rik | NM_025526.1 | Mus musculus RIKEN cDNA 2310020H20 gene (2310020H20Rik), mRNA.                                                |
| sci19764.11    | 583-S | 111.8365 | 2.77  | Tpd52l2       | NM_025482.2 | Mus musculus tumor protein D52-like 2 (Tpd52l2), mRNA.                                                        |
| sci016647.2    | 13-S  | 111.8019 | 14.14 | Kpna2         | XM_130821.1 | Mus musculus karyopherin (importin) alpha 2 (Kpna2), mRNA.                                                    |
| sci21117.18    | 194-S | 111.7538 | 5.19  | AW060766      | NM_198033.1 | Mus musculus expressed sequence AW060766 (AW060766), mRNA.                                                    |
| sci020115.2    | 55-S  | 111.5267 | 1.61  | Rps7          | NM_011300   | Mus musculus ribosomal protein S7 (Rps7), mRNA.                                                               |
| sci24046.11    | 327-S | 111.4919 | 3.11  | C8a           | NM_146148.1 | Mus musculus complement component 8, alpha polypeptide (C8a), mRNA.                                           |
| sci19685.22.1  | 10-S  | 111.4467 | 1.72  | Itih2         | NM_010582.1 | Mus musculus inter-alpha trypsin inhibitor, heavy chain 2 (Itih2), mRNA.                                      |
| sci42309.7.1   | 14-S  | 111.2931 | 2.42  | Vti1b         | NM_016800.2 | Mus musculus vesicle transport through interaction with t-SNAREs 1B homolog (Vti1b), mRNA.                    |
| sci0209039.30  | 312-S | 111.2733 | 10.56 | Tenc1         | NM_153533.1 | Mus musculus tensin like C1 domain-containing phosphatase (Tenc1), mRNA.                                      |
| sci000144.1    | 17-S  | 111.2727 | 6.07  | Mir16         | NM_019580.3 | Mus musculus membrane interacting protein of RGS16 (Mir16), mRNA.                                             |
| sci28761.2     | 42-S  | 111.0416 | 3.78  | Cml2          | NM_053096.2 | Mus musculus camello-like 2 (Cml2), mRNA.                                                                     |
| sci0066999.2   | 129-S | 110.8901 | 2.78  | 1500003D12Rik | NM_025895.2 | Mus musculus RIKEN cDNA 1500003D12 gene (1500003D12Rik), mRNA.                                                |
| sci0012192.2   | 103-S | 110.786  | 6.57  | Zfp36l1       | NM_007564.2 | Mus musculus zinc finger protein 36, C3H type-like 1 (Zfp36l1), mRNA.                                         |
| sci071779.8    | 36-S  | 110.6117 | 5.53  | Mir           | NM_027920.3 |                                                                                                               |
| sci37626.20.1  | 66-S  | 110.51   | 17.85 | D10Erd802e    | NM_198021.1 | Mus musculus DNA segment, Chr 10, ERATO Doi 802, expressed (D10Erd802e), mRNA.                                |
| sci37953.14    | 53-S  | 110.4288 | 4.24  | Man1a         | NM_008548.2 | Mus musculus mannosidase 1, alpha (Man1a), mRNA.                                                              |
| sci0020442.2   | 266-S | 110.416  | 6     | Siat4a        | NM_009177.2 | Mus musculus sialyltransferase 4A (beta-galactoside alpha-2,3-sialyltransferase) (Siat4a), mRNA.              |
| sci18647.1     | 62-S  | 110.2587 | 2.12  | Cenpb         | NM_007682.2 | Mus musculus centromere autoantigen B (Cenpb), mRNA.                                                          |
| sci029864.1    | 22-S  | 109.9708 | 3     | Rnf11         | NM_013876.2 | Mus musculus ring finger protein 11 (Rnf11), mRNA.                                                            |
| sci057905.1    | 53-S  | 109.9411 | 3.91  | 5830446M03Rik | NM_133934.2 | Mus musculus RIKEN cDNA 5830446M03 gene (5830446M03Rik), mRNA.                                                |
| sci0056207.2   | 50-S  | 109.3773 | 3.02  | Uchl5         | NM_019562.1 | Mus musculus ubiquitin carboxyl-terminal esterase L5 (Uchl5), mRNA.                                           |
| sci28063.9.402 | 1-S   | 109.28   | 38.69 | Psmc2         | NM_011188.1 | Mus musculus proteasome (prosome, macropain) 26S subunit, ATPase 2 (Psmc2), mRNA.                             |
| sci078653.2    | 11-S  | 109.1884 | 1.72  | 1810056O20Rik | NM_175277.2 | Mus musculus RIKEN cDNA 1810056O20 gene (1810056O20Rik), mRNA.                                                |

|               |       |          |       |               |             |                                                                                                                               |
|---------------|-------|----------|-------|---------------|-------------|-------------------------------------------------------------------------------------------------------------------------------|
| scl0012793.2  | 38-S  | 109.1371 | 2.34  | Cnih          | NM_009919.1 | Mus musculus cornichon homolog (Drosophila) (Cnih), mRNA.                                                                     |
| scl068839.1   | 117-S | 108.8572 | 8.07  | 1110054N06Rik | NM_175134.2 | Mus musculus RIKEN cDNA 1110054N06 gene (1110054N06Rik), mRNA.                                                                |
| scl47780.3.9  | 1-5-S | 108.8079 | 1.87  | Rpl8          | NM_012053.1 | Mus musculus ribosomal protein L8 (Rpl8), mRNA.                                                                               |
| scl013722.3   | 29-S  | 108.7114 | 2.02  | Scye1         | NM_007926.1 | Mus musculus small inducible cytokine subfamily E, member 1 (Scye1), mRNA.                                                    |
| scl31132.7.1  | 7-S   | 108.6033 | 1.73  | Cib1          | NM_011870.2 | Mus musculus calcium and integrin binding 1 (calmyrin) (Cib1), mRNA.                                                          |
| scl016784.1   | 5-S   | 108.563  | 1.61  | Lamp2         | NM_010685.2 | Mus musculus lysosomal membrane glycoprotein 2 (Lamp2), mRNA.                                                                 |
| scl42676.6    | 93-S  | 108.3838 | 3.38  | Rab10         | NM_016676.2 | Mus musculus RAB10, member RAS oncogene family (Rab10), mRNA.                                                                 |
| scl052690.1   | 86-S  | 108.3514 | 9.39  | D12Erd771e    | NM_028262.1 | Mus musculus DNA segment, Chr 12, ERATO Doi 771, expressed (D12Erd771e), mRNA.                                                |
| scl0108991.1  | 11-S  | 108.1684 | 2.07  | 1700001A24Rik | NM_175395.2 | Mus musculus RIKEN cDNA 1700001A24 gene (1700001A24Rik), mRNA.                                                                |
| scl020463.2   | 41-S  | 107.6437 | 1.71  | Cox7a2l       | XM_123188.1 | Mus musculus cytochrome c oxidase subunit VIIa polypeptide 2-like (Cox7a2l), mRNA.                                            |
| scl011758.1   | 35-S  | 107.6316 | 3.78  | Prdx6         | NM_007453.2 | Mus musculus peroxiredoxin 6 (Prdx6), mRNA.                                                                                   |
| scl0021915.2  | 168-S | 107.6279 | 4.8   | Dtymk         | NM_023136.1 | Mus musculus deoxythymidylate kinase (Dtymk), mRNA.                                                                           |
| scl0001373.1  | 2-S   | 107.425  | 1.73  | Sumo2         | NM_133354   |                                                                                                                               |
| scl068183.7   | 27-S  | 107.4238 | 7.87  | Bcas2         | NM_026602.1 | Mus musculus breast carcinoma amplified sequence 2 (Bcas2), mRNA.                                                             |
| scl026446.4   | 108-S | 107.3944 | 1.66  | Psmb3         | NM_011971.2 | Mus musculus proteasome (prosome, macropain) subunit, beta type 3 (Psmb3), mRNA.                                              |
| scl0110842.2  | 3-S   | 107.3684 | 2.56  | Efta          | NM_145615.2 | Mus musculus electron transferring flavoprotein, alpha polypeptide (Efta), nuclear gene encoding mitochondrial protein, mRNA. |
| scl00212555.2 | 311-S | 107.3377 | 2.04  | Pqlc2         | NM_145384.1 | Mus musculus PQ loop repeat containing 2 (Pqlc2), mRNA.                                                                       |
| scl000063.1   | 0-S   | 107.286  | 1.91  | Nit1          | NM_012049.1 | Mus musculus nitrilase 1 (Nit1), mRNA.                                                                                        |
| scl015516.6   | 124-S | 107.0782 | 3.1   | Hspcb         | NM_008302.2 | Mus musculus heat shock protein 1, beta (Hspcb), mRNA.                                                                        |
| scl40468.10   | 17-S  | 106.9284 | 1.88  | 9130023F12Rik | NM_181411.2 | Mus musculus RIKEN cDNA 9130023F12 gene (9130023F12Rik), mRNA.                                                                |
| scl0001647.1  | 23-S  | 106.828  | 1.88  |               | XM_128511.3 | Mus musculus RIKEN cDNA 0610011F06 gene (0610011F06Rik), mRNA.                                                                |
| scl44239.8    | 168-S | 106.7558 | 12.03 | Zfp307        | NM_023685.2 |                                                                                                                               |
| scl39451.19.1 | 30-S  | 106.6891 | 3.64  | Ftsj3         | NM_025310.2 | Mus musculus FtsJ homolog 3 (E. coli) (Ftsj3), mRNA.                                                                          |
| scl37704.3.1  | 30-S  | 106.5407 | 1.85  | Mrpl54        | NM_025317.1 | Mus musculus mitochondrial ribosomal protein L54 (Mrpl54), mRNA.                                                              |
| scl37311.9.1  | 1-S   | 106.5347 | 2.71  | 4833420K19Rik | NM_029775.1 | Mus musculus RIKEN cDNA 4833420K19 gene (4833420K19Rik), mRNA.                                                                |
| scl0002291.1  | 1-S   | 106.2504 | 2.19  | Trappc6b      | XM_127025.2 | Mus musculus trafficking protein particle complex 6B (Trappc6b), mRNA.                                                        |
| scl0026458.2  | 190-S | 106.0078 | 1.59  | Sic27a2       | NM_011978.1 | Mus musculus solute carrier family 27 (fatty acid transporter), member 2 (Sic27a2), mRNA.                                     |
| scl0019087.2  | 280-S | 105.9534 | 29.36 | Prkar2a       | NM_008924.1 | Mus musculus protein kinase, cAMP dependent regulatory, type II alpha (Prkar2a), mRNA.                                        |
| scl27722.12.1 | 0-S   | 105.9135 | 2.1   | Asrj          | NM_023429.2 |                                                                                                                               |
| scl42853.2.1  | 24-S  | 105.8487 | 14.48 | D230037D09Rik | NM_177140.2 | Mus musculus RIKEN cDNA D230037D09 gene (D230037D09Rik), mRNA.                                                                |
| scl022224.14  | 3-S   | 105.501  | 12.03 | Usp10         | NM_009462.1 | Mus musculus ubiquitin specific protease 10 (Usp10), mRNA.                                                                    |
| scl2037.1.1   | 223-S | 105.2301 | 15.64 | Ang2          | NM_007449   | Mus musculus angiogenin, ribonuclease A family, member 2 (Ang2), mRNA.                                                        |
| scl25516.10   | 536-S | 105.1693 | 2.44  | Tesk1         | NM_011571.2 | Mus musculus testis specific protein kinase 1 (Tesk1), mRNA.                                                                  |
| scl0116748.2  | 296-S | 105.1606 | 2.04  | Lsm10         | NM_138721.1 | Mus musculus U7 snRNP-specific Sm-like protein LSM10 (Lsm10), mRNA.                                                           |
| scl067738.10  | 4-S   | 105.1459 | 2.67  | Ppid          | NM_026352.2 | Mus musculus peptidylprolyl isomerase D (cyclophilin D) (Ppid), mRNA.                                                         |
| scl25126.19.1 | 29-S  | 105.129  | 1.63  | Faf1          | NM_007983.2 | Mus musculus Fas-associated factor 1 (Faf1), mRNA.                                                                            |
| scl0003930.1  | 2-S   | 105.0337 | 1.72  | Bloc1s1       | NM_015740.2 |                                                                                                                               |
| scl31884.10.2 | 33-S  | 104.9356 | 2.6   | Tm4sf7        | NM_053082.1 | Mus musculus transmembrane 4 superfamily member 7 (Tm4sf7), mRNA.                                                             |
| scl0223773.9  | 321-S | 104.8611 | 18.96 | Zbed4         | NM_181412.2 |                                                                                                                               |
| scl0067899.2  | 259-S | 104.8486 | 1.63  | 2010110K16Rik | NM_026442.2 | Mus musculus RIKEN cDNA 2010110K16 gene (2010110K16Rik), mRNA.                                                                |
| scl20180.20   | 84-S  | 104.8211 | 5.24  | Rin2          | NM_028724.2 | Mus musculus Ras and Rab interactor 2 (Rin2), mRNA.                                                                           |
| scl0102143.1  | 151-S | 104.7285 | 2.77  | D130072O21Rik | NM_175322.2 | Mus musculus RIKEN cDNA D130072O21 gene (D130072O21Rik), mRNA.                                                                |
| scl37898.15   | 404-S | 104.6088 | 3.32  | Ddx21         | NM_019553.1 | Mus musculus DEAD (Asp-Glu-Ala-Asp) box polypeptide 21 (Ddx21), mRNA.                                                         |
| scl33243.5.1  | 27-S  | 104.5608 | 1.75  | Cox4i1        | NM_009941.1 | Mus musculus cytochrome c oxidase subunit IV isoform 1 (Cox4i1), mRNA.                                                        |
| scl077113.1   | 28-S  | 104.4485 | 18.42 | Klh2          | NM_178633.1 | Mus musculus kelch-like 2, Mayven (Drosophila) (Klh2), mRNA.                                                                  |
| scl20017.4.1  | 0-S   | 104.3816 | 1.62  | 1110008F13Rik | NM_026124.1 | Mus musculus RIKEN cDNA 1110008F13 gene (1110008F13Rik), mRNA.                                                                |
| scl32299.7.1  | 25-S  | 104.2451 | 2.57  | Stard10       | NM_019990.1 | Mus musculus START domain containing 10 (Stard10), mRNA.                                                                      |
| scl0003895.1  | 38-S  | 104.2251 | 1.96  | Myf6          | NM_010860   | Mus musculus myosin, light polypeptide 6, alkali, smooth muscle and non-muscle (Myf6), mRNA.                                  |
| scl0023950.1  | 557-S | 104.1281 | 19.24 | Dnajb6        | NM_011847.1 | Mus musculus DnaJ (Hsp40) homolog, subfamily B, member 6 (Dnajb6), mRNA.                                                      |
| scl0106298.14 | 12-S  | 104.0618 | 6.43  | Rrn3          | XM_358764.1 |                                                                                                                               |
| scl00347709.1 | 259-S | 104.0167 | 5.58  | Pramel4       | NM_178248.2 | Mus musculus preferentially expressed antigen in melanoma like 4 (Pramel4), mRNA.                                             |
| scl0078825.1  | 275-S | 103.992  | 22.29 | 5830417C01Rik | NM_024282.2 | Mus musculus RIKEN cDNA 5830417C01 gene (5830417C01Rik), mRNA.                                                                |
| scl44819.5    | 313-S | 103.9454 | 1.66  | C78339        | XM_127312.4 | Mus musculus expressed sequence C78339 (C78339), mRNA.                                                                        |
| scl000756.1   | 295-S | 103.9407 | 12.43 | Dst           | NM_133833.1 | Mus musculus dystonin (Dst), mRNA.                                                                                            |
| scl46280.17   | 461-S | 103.8051 | 5.32  | Wdr23         | NM_133734.1 | Mus musculus WD repeat domain 23 (Wdr23), mRNA.                                                                               |
| scl21513.4.14 | 14-S  | 103.6444 | 1.68  | 2310008M10Rik | NM_025509.2 | Mus musculus RIKEN cDNA 2310008M10 gene (2310008M10Rik), mRNA.                                                                |

|                       |           |          |        |               |             |                                                                                                                               |
|-----------------------|-----------|----------|--------|---------------|-------------|-------------------------------------------------------------------------------------------------------------------------------|
| sci40588.14.79        | 66-S      | 103.6122 | 2.31   | Sec14l2       | NM_144520.1 | Mus musculus SEC14-like 2 ( <i>S. cerevisiae</i> ) (Sec14l2), mRNA.                                                           |
| sci44261.19.1         | 20-S      | 103.5288 | 12.43  | AF397014      | NM_138654.2 | Mus musculus cDNA sequence AF397014 (AF397014), mRNA.                                                                         |
| sci41351.4.1          | 17-S      | 103.4482 | 1.78   | Gabarap       | NM_019749.3 | Mus musculus gamma-aminobutyric acid receptor associated protein (Gabarap), mRNA.                                             |
| sci31028.4.1          | 18-S      | 103.3321 | 101.84 | Aqp11         | NM_175105.2 | Mus musculus aquaporin 11 (Aqp11), mRNA.                                                                                      |
| sci066481.4           | 0-S       | 102.8888 | 1.58   | Rps21         | NM_025587.1 | Mus musculus ribosomal protein S21 (Rps21), mRNA.                                                                             |
| sci0015129.1          | 300-S     | 102.8602 | 13.42  | Hbb-b1        | NM_008220.2 | Mus musculus hemoglobin, beta adult major chain (Hbb-b1), mRNA.                                                               |
| sci00218214.2         | 131-S     | 102.6362 | 22     | Aof1          | NM_172262.1 | Mus musculus amine oxidase, flavin containing 1 (Aof1), mRNA.                                                                 |
| sci0002992.1          | 44-S      | 102.3982 | 1.94   | Lamp2         | NM_010685.2 | Mus musculus lysosomal membrane glycoprotein 2 (Lamp2), mRNA.                                                                 |
| sci0003299.1          | 11-S      | 102.358  | 6.75   | 2810410A08Rik | XM_130324.4 | Mus musculus RIKEN cDNA 2810410A08 gene (2810410A08Rik), mRNA.                                                                |
| sci18576.11.3         | 13-S      | 102.3223 | 21.4   | Snx5          | NM_024225.2 | Mus musculus sorting nexin 5 (Snx5), mRNA.                                                                                    |
| sci17563.43           | 11-S      | 101.8118 | 16.44  | Clasp1        | NM_017470.2 | Mus musculus CLIP associating protein 1 (Clasp1), mRNA.                                                                       |
| sci069367.4           | 58-S      | 101.8117 | 2.48   | Glrx2         | NM_023505.1 | Mus musculus glutaredoxin 2 (thioltransferase) (Glrx2), mRNA.                                                                 |
| sci056612.4           | 0-S       | 101.7735 | 1.68   | Pfdn5         | NM_020031.1 | Mus musculus prefoldin 5 (Pfdn5), mRNA.                                                                                       |
| sci066407.8           | 34-S      | 101.7438 | 3.17   | Mrps15        |             |                                                                                                                               |
| sci0266692.1          | 279-S     | 101.6895 | 12.25  | Cpne1         | NM_170590.1 | Mus musculus copine I (Cpne1), transcript variant 1, mRNA.                                                                    |
| sci022631.1           | 10-S      | 101.4957 | 14.75  | Ywhaz         | NM_011740.2 | Mus musculus tyrosine 3-monooxygenase/tryptophan 5-monooxygenase activation protein, zeta polypeptide (Ywhaz), mRNA.          |
| sci44520.17.1         | 0-S       | 101.4202 | 7.71   | Dmgdh         | NM_028772.1 | Mus musculus dimethylglycine dehydrogenase precursor (Dmgdh), mRNA.                                                           |
| sci41758.26.1         | 24-S      | 101.2455 | 15.17  | Pnpt1         | NM_027869.1 | Mus musculus polyribonucleotide nucleotidyltransferase 1 (Pnpt1), mRNA.                                                       |
| sci28064.14.1         | 8-S       | 101.2383 | 25.92  | Pmpcb         | XM_131914.3 |                                                                                                                               |
| sci28069.32.1         | 8-S       | 101.232  | 10.35  | A530088I07Rik | NM_175437.2 | Mus musculus RIKEN cDNA A530088I07 gene (A530088I07Rik), mRNA.                                                                |
| sci0223499.9          | 30-S      | 101.1577 | 2.35   | Gm83          | NM_198606.1 | Mus musculus gene model 83, (NCBI) (Gm83), mRNA.                                                                              |
| sci068178.1           | 250-S     | 101.0595 | 1.81   | 4933421H10Rik | NM_026599.3 | Mus musculus RIKEN cDNA 4933421H10 gene (4933421H10Rik), mRNA.                                                                |
| sci00110842.1         | 108-S     | 100.8896 | 1.57   | Efta          | NM_145615.2 | Mus musculus electron transferring flavoprotein, alpha polypeptide (Efta), nuclear gene encoding mitochondrial protein, mRNA. |
| sci0004156.1          | 115-S     | 100.8646 | 1.71   | 1600019D15Rik | NM_028975.2 | Mus musculus RIKEN cDNA 1600019D15 gene (1600019D15Rik), mRNA.                                                                |
| sci53786.5.1          | 4-S       | 100.7952 | 2.79   | Psm10         | NM_016883.3 | Mus musculus proteasome (prosome, macropain) 26S subunit, non-ATPase, 10 (Psm10), mRNA.                                       |
| sci0003758.1          | 1237-S    | 100.7569 | 1.59   | Ubqln1        | NM_026842.3 | Mus musculus ubiquilin 1 (Ubqln1), transcript variant 1, mRNA.                                                                |
| sci43245.1.1          | 35-S      | 100.6973 | 1.75   | Immp2l        | NM_053122.2 | Mus musculus inner mitochondrial membrane peptidase 2-like ( <i>S. cerevisiae</i> ) (Immp2l), mRNA.                           |
| sci069466.1           | 2-S       | 100.5976 | 17.65  | 2300006M17Rik | XM_127388.3 | Mus musculus RIKEN cDNA 2300006M17 gene (2300006M17Rik), mRNA.                                                                |
| sci0002708.1          | 0-S       | 100.5808 | 2.16   | 0610037L13Rik | NM_028754.1 | Mus musculus RIKEN cDNA 0610037L13 gene (0610037L13Rik), mRNA.                                                                |
| sci00394435.1         | 2-S       | 100.5718 | 17.8   | Ugt1a6        | NM_145079   | Mus musculus UDP glycosyltransferase 1 family, polypeptide A6 (Ugt1a6), mRNA.                                                 |
| sci0003006.1          | 310-S     | 100.1701 | 2.27   | Fbxo3         | NM_212433.1 | Mus musculus F-box only protein 3 (Fbxo3), transcript variant 2, mRNA.                                                        |
| sci42451.6.1          | 16-S      | 100.1239 | 137.25 | Nfkbia        | NM_010907   | Mus musculus nuclear factor of kappa light chain gene enhancer in B-cells inhibitor, alpha (Nfkbia), mRNA.                    |
| sci0071702.2          | 200-S     | 99.9285  | 1.86   | Cdc5l         | NM_152810.1 | Mus musculus cell division cycle 5-like ( <i>S. pombe</i> ) (Cdc5l), mRNA.                                                    |
| sci44846.7            | 0-S       | 99.8955  | 5.57   | Nol7          | NM_023554.1 | Mus musculus nucleolar protein 7 (Nol7), mRNA.                                                                                |
| sci021371.3           | 17-S      | 99.8825  | 1.6    | Tbca          | NM_009321.1 | Mus musculus tubulin cofactor a (Tbca), mRNA.                                                                                 |
| sci0003628.1          | 0-S       | 99.8584  | 1.65   | Ndufs4        | NM_010887.1 | Mus musculus NADH dehydrogenase (ubiquinone) Fe-S protein 4 (Ndufs4), mRNA.                                                   |
| sci20384.11.8         | 5-S       | 99.8391  | 1.59   | Grp58         | NM_007952.1 | Mus musculus glucose regulated protein (Grp58), mRNA.                                                                         |
| sci42976.13.1         | 6-S       | 99.8112  | 2.26   | Coq6          | NM_172582.1 | Mus musculus coenzyme Q6 homolog (yeast) (Coq6), mRNA.                                                                        |
| sci000075.1           | 18 REVCOM | 99.5495  | 1.8    | AA959742      | NM_133807.1 | Mus musculus expressed sequence AA959742 (AA959742), mRNA.                                                                    |
| sci18004.30           | 24-S      | 99.5367  | 3.95   | Thpp2         | NM_009418.1 | Mus musculus tripeptidyl peptidase II (Thpp2), mRNA.                                                                          |
| sci027643.2           | 36-S      | 99.3623  | 2.1    | Ubl4          | NM_145405.1 | Mus musculus ubiquitin-like 4 (Ubl4), mRNA.                                                                                   |
| sci0224904.1          | 72-S      | 99.3399  | 2.41   | 2410015M20Rik | NM_153152.2 | Mus musculus RIKEN cDNA 2410015M20 gene (2410015M20Rik), mRNA.                                                                |
| sci21701.9.1          | 3-S       | 99.2889  | 21.23  | Atp5f1        | NM_009725.1 | Mus musculus ATP synthase, H+ transporting, mitochondrial F0 complex, subunit b, isoform 1 (Atp5f1), mRNA.                    |
| sci070257.1           | 12-S      | 99.2306  | 2.18   | 2010107E04Rik | NM_027360.1 | Mus musculus RIKEN cDNA 2010107E04 gene (2010107E04Rik), mRNA.                                                                |
| sci00217869.1         | 91-S      | 99.1394  | 1.91   | Eif5          | NM_173363.2 | Mus musculus eukaryotic translation initiation factor 5 (Eif5), mRNA.                                                         |
| sci020335.2           | 33-S      | 99.1113  | 2.8    | Sec61g        | XM_122171.1 | Mus musculus SEC61, gamma subunit (Sec61g), mRNA.                                                                             |
| sci35401.5            | 32-S      | 99.0805  | 2.67   | 6230410P16Rik | NM_174846.3 | Mus musculus RIKEN cDNA 6230410P16 gene (6230410P16Rik), mRNA.                                                                |
| sci31564.8.5          | 30-S      | 98.9379  | 4.91   | 1200009C21Rik | NM_028659.1 | Mus musculus RIKEN cDNA 1200009C21 gene (1200009C21Rik), mRNA.                                                                |
| sci013010.2           | 9-S       | 98.9068  | 1.62   | Cst3          | NM_009976.2 | Mus musculus cystatin C (Cst3), mRNA.                                                                                         |
| sci0014858.1          | 22-S      | 98.8111  | 8.46   | Gsta2         | NM_008182.1 | Mus musculus glutathione S-transferase, alpha 2 (Yc2) (Gsta2), mRNA.                                                          |
| sci53939.16           | 446-S     | 98.7293  | 3.09   | Abcb7         | XM_356348.1 | Mus musculus ATP-binding cassette, sub-family B (MDR/TAP), member 7 (Abcb7), mRNA.                                            |
| sci45769.2.281        | 2-S       | 98.5551  | 1.66   | 1810004F21Rik | NM_026911.1 | Mus musculus RIKEN cDNA 1810004F21 gene (1810004F21Rik), mRNA.                                                                |
| sci0056690.1          | 158-S     | 98.2134  | 1.86   | Mlycd         | NM_019966.1 | Mus musculus malonyl-CoA decarboxylase (Mlycd), mRNA.                                                                         |
| sci0067264.2          | 318-S     | 98.1887  | 1.87   | Ndufb8        | NM_026061.1 | Mus musculus NADH dehydrogenase (ubiquinone) 1 beta subcomplex 8 (Ndufb8), mRNA.                                              |
| gi_31981889_ref_NM_00 |           | 97.8842  | 1.55   | B2m           | NM_009735.2 | Mus musculus beta-2 microglobulin (B2m), mRNA.                                                                                |
| sci098985.1           | 28-S      | 97.8283  | 6.77   | AI462438      | NM_133840.1 | Mus musculus expressed sequence AI462438 (AI462438), mRNA.                                                                    |



|                       |         |       |               |             |                                                                                                       |
|-----------------------|---------|-------|---------------|-------------|-------------------------------------------------------------------------------------------------------|
| scl071238.2_50-S      | 97.8006 | 3.74  | Acn9          | XM 355744.1 |                                                                                                       |
| scl0110052.3_51-S     | 97.7839 | 3.25  | Dek           | NM 025900.1 | Mus musculus DEK oncogene (DNA binding) (Dek), mRNA.                                                  |
| scl00061.1_10-S       | 97.7463 | 15.54 | Ppp1r14a      | NM 026731.2 | Mus musculus protein phosphatase 1, regulatory (inhibitor) subunit 14A (Ppp1r14a), mRNA.              |
| scl0011973.2_248-S    | 97.3908 | 1.61  | Atp6v1e1      | NM 007510.2 | Mus musculus ATPase, H+ transporting, V1 subunit E isoform 1 (Atp6v1e1), mRNA.                        |
| scl0230700.13_329-S   | 97.3332 | 3.87  | C330039G02Rik | NM 172699.2 | Mus musculus RIKEN cDNA C330039G02 gene (C330039G02Rik), mRNA.                                        |
| scl0210148.13_0-S     | 97.2211 | 2.44  | Slc30a6       | NM 144798.2 | Mus musculus solute carrier family 30 (zinc transporter), member 6 (Slc30a6), mRNA.                   |
| scl0101867.1_89-S     | 97.0207 | 16.52 | 1500003O22Rik | NM 025897.1 | Mus musculus RIKEN cDNA 1500003O22 gene (1500003O22Rik), mRNA.                                        |
| scl18363.8_35-S       | 96.913  | 4.31  | Sdc4          | NM 011521.1 | Mus musculus syndecan 4 (Sdc4), mRNA.                                                                 |
| scl0002135.1_327-S    | 96.853  | 43.11 | Rarres1       | XM 130987.3 |                                                                                                       |
| scl36820.13_122-S     | 96.7951 | 3     | 2010321M09Rik | NM 175153.2 | Mus musculus RIKEN cDNA 2010321M09 gene (2010321M09Rik), mRNA.                                        |
| scl28280.10.1_35-S    | 96.4376 | 14.74 | 1100001H23Rik | NM 025806.1 | Mus musculus RIKEN cDNA 1100001H23 gene (1100001H23Rik), mRNA.                                        |
| scl36022.9.1_13-S     | 96.2131 | 20.16 | Tbrg1         | NM 025289.1 | Mus musculus transforming growth factor beta regulated gene 1 (Tbrg1), mRNA.                          |
| scl0013909.2_193-S    | 96.2057 | 4.65  | LOC13909      | NM 144511.1 | Mus musculus esterase 31-like (LOC13909), mRNA.                                                       |
| scl42564.18.1_22-S    | 96.2019 | 17.13 | Sntg2         | NM 172951.1 | Mus musculus syntrophin, gamma 2 (Sntg2), mRNA.                                                       |
| scl00223696.2_201-S   | 96.1936 | 6.14  | Tomm22        | NM 172609.2 | Mus musculus translocase of outer mitochondrial membrane 22 homolog (yeast) (Tomm22), mRNA.           |
| scl18618.8_0-S        | 96.051  | 14.33 | 3300001M20Rik | NM 175113.1 | Mus musculus RIKEN cDNA 3300001M20 gene (3300001M20Rik), mRNA.                                        |
| scl0067618.2_236-S    | 96.0351 | 5.07  | Aasdhpt       | NM 026276.1 | Mus musculus aminoadipate-semialdehyde dehydrogenase-phosphopantetheinyl transferase (Aasdhpt), mRNA. |
| scl32577.4.1_30-S     | 95.9867 | 1.69  | Mcee          | XM 133510.4 |                                                                                                       |
| scl22880.8.1_176-S    | 95.918  | 13.06 | Ciss          | NM 021281.1 | Mus musculus cathepsin S (Ciss), mRNA.                                                                |
| scl0002881.1_47-S     | 95.8997 | 4.81  | Pdcd8         | NM 012019.2 | Mus musculus programmed cell death 8 (Pdcd8), mRNA.                                                   |
| scl0017836.1_208-S    | 95.8678 | 8.03  | Mug1          | NM 008645.2 | Mus musculus murinoglobulin 1 (Mug1), mRNA.                                                           |
| scl29521.11_18-S      | 95.8462 | 2.58  | Grcc3f        | NM 145130.1 | Mus musculus gene rich cluster, C3f gene (Grcc3f), mRNA.                                              |
| scl0052040.1_253-S    | 95.7043 | 3.4   | Ppp1r10       | NM 175934.2 | Mus musculus protein phosphatase 1, regulatory subunit 10 (Ppp1r10), mRNA.                            |
| scl066958.2_91-S      | 95.7001 | 4.72  | 2310042M24Rik | NM 025868.1 | Mus musculus RIKEN cDNA 2310042M24 gene (2310042M24Rik), mRNA.                                        |
| scl0076654.1_225-S    | 95.655  | 2.26  | Upp2          | NM 029692.1 | Mus musculus uridine phosphorylase 2 (Upp2), mRNA.                                                    |
| scl00224826.1_101-S   | 95.6443 | 3.69  | E130209G04Rik | XM 358323.1 | Mus musculus RIKEN cDNA E130209G04 gene (E130209G04Rik), mRNA.                                        |
| scl066416.3_80-S      | 95.4084 | 1.68  | Ndufa7        | NM 023202.2 | Mus musculus NADH dehydrogenase (ubiquinone) 1 alpha subcomplex, 7 (B14.5a) (Ndufa7), mRNA.           |
| scl51735.42.647_134-S | 95.3726 | 2.53  | 5430411K18Rik | XM 140491.4 | Mus musculus RIKEN cDNA 5430411K18 gene (5430411K18Rik), mRNA.                                        |
| scl33697.10.1_67-S    | 95.2793 | 2.11  | 1110012M11Rik | NM 028617.2 | Mus musculus RIKEN cDNA 1110012M11 gene (1110012M11Rik), mRNA.                                        |
| scl15797.5_597-S      | 95.0689 | 3.62  | Lypla1        | NM 146106.1 | Mus musculus lysophospholipase-like 1 (Lypla1), mRNA.                                                 |
| scl0019647.2_60-S     | 94.7168 | 11.37 | Rbbp6         | NM 011247.1 | Mus musculus retinoblastoma binding protein 6 (Rbbp6), mRNA.                                          |
| scl0019646.2_143-S    | 94.6895 | 3.46  | Rbbp4         | NM 009030.1 | Mus musculus retinoblastoma binding protein 4 (Rbbp4), mRNA.                                          |
| scl066272.3_26-S      | 94.6672 | 1.79  | 1810020G14Rik | NM 025461.2 | Mus musculus RIKEN cDNA 1810020G14 gene (1810020G14Rik), mRNA.                                        |
| scl066340.3_30-S      | 94.522  | 1.95  | 1700023M09Rik | NM 025498.2 | Mus musculus RIKEN cDNA 1700023M09 gene (1700023M09Rik), mRNA.                                        |
| scl078929.1_104-S     | 94.3587 | 3.96  | Polr3h        | NM 030229.2 |                                                                                                       |
| scl000096.1_251-S     | 94.3016 | 7.69  | 1600012H06Rik | NM 026451.1 | Mus musculus RIKEN cDNA 1600012H06 gene (1600012H06Rik), mRNA.                                        |
| scl0094279.1_24-S     | 94.2111 | 3.86  | Sfxn2         | NM 053196.2 | Mus musculus sideroflexin 2 (Sfxn2), mRNA.                                                            |
| scl093673.1_29-S      | 94.1543 | 42.59 | Cml2          | NM 053096.2 | Mus musculus camello-like 2 (Cml2), mRNA.                                                             |
| scl0021843.2_5-S      | 94.1292 | 2.25  | Tial1         | NM 009383.1 | Mus musculus Tial1 cytotoxic granule-associated RNA binding protein-like 1 (Tial1), mRNA.             |
| scl24875.11.1_30-S    | 94.1203 | 12.19 | Taf12         | NM 025579.1 | Mus musculus TAF12 RNA polymerase II, TATA box binding protein (TBP)-associated factor (Taf12), mRNA. |
| scl011814.2_27-S      | 94.03   | 1.72  | Apoc3         | NM 023114.2 | Mus musculus apolipoprotein C-III (Apoc3), mRNA.                                                      |
| scl0001096.1_118-S    | 93.9421 | 4.61  | Slco1a4       | NM 030687.1 | Mus musculus solute carrier organic anion transporter family, member 1a4 (Slco1a4), mRNA.             |
| scl00109624.1_38-S    | 93.533  | 18.56 | Cald1         | NM 145575.1 | Mus musculus caldesmon 1 (Cald1), mRNA.                                                               |
| scl44991.2.1_21-S     | 93.2651 | 2.05  | Hist1h2bc     | NM 023422   | Mus musculus histone 1, H2bc (Hist1h2bc), mRNA.                                                       |
| scl0002513.1_19-S     | 93.2353 | 43.96 | C9            | NM 013485.1 | Mus musculus complement component 9 (C9), mRNA.                                                       |
| scl0001252.1_55-S     | 92.802  | 20.97 | Hnrpa2b1      | NM 016806   | Mus musculus heterogeneous nuclear ribonucleoprotein A2/B1 (Hnrpa2b1), transcript variant 2, mRNA.    |
| scl0056349.2_77-S     | 92.5865 | 3.56  | Net1          | NM 019671.1 | Mus musculus neuroepithelial cell transforming gene 1 (Net1), mRNA.                                   |
| scl0099889.1_5-S      | 92.4892 | 2.58  | Arfp1         | XM 130985.2 |                                                                                                       |
| scl00215751.1_299-S   | 92.4155 | 3.02  | BC013529      | NM 145418.1 | Mus musculus cDNA sequence BC013529 (BC013529), mRNA.                                                 |
| scl018472.2_44-S      | 92.4148 | 2.16  | Pafah1b1      | NM 013625.1 | Mus musculus platelet-activating factor acetylhydrolase, isoform 1b, beta1 subunit (Pafah1b1), mRNA.  |
| scl019167.11_85-S     | 92.3469 | 1.64  | Psm3          | NM 011184.2 | Mus musculus proteasome (prosome, macropain) subunit, alpha type 3 (Psm3), mRNA.                      |
| scl0056628.1_326-S    | 92.2507 | 7.25  | LOC56628      | NM 019909.1 | Mus musculus MHC (A.CA/J(H-2K-I) class I antigen (LOC56628), mRNA.                                    |
| scl0022221.2_82-S     | 92.1816 | 14.28 | Ubp1          | NM 013699.1 | Mus musculus upstream binding protein 1 (Ubp1), mRNA.                                                 |
| scl013480.1_38-S      | 92.0887 | 6.03  | Dpm1          | NM 010072.2 | Mus musculus dolichol-phosphate (beta-D) mannosyltransferase 1 (Dpm1), mRNA.                          |
| scl0004118.1_555-S    | 91.7441 | 22.12 | Rpo1-3        | NM 181730.2 | Mus musculus RNA polymerase 1-3 (Rpo1-3), mRNA.                                                       |
| scl36473.24.9_6-S     | 91.6897 | 7.12  | Usp4          | NM 011678.1 | Mus musculus ubiquitin specific protease 4 (proto-oncogene) (Usp4), mRNA.                             |

|                      |         |        |               |             |                                                                                                                           |
|----------------------|---------|--------|---------------|-------------|---------------------------------------------------------------------------------------------------------------------------|
| scl0230163.1 72-S    | 91.6841 | 4.91   | Aldob         | NM_144903.2 |                                                                                                                           |
| scl20357.15.1 26-S   | 91.6776 | 7.99   | Sqrdl         | NM_021507.4 | Mus musculus sulfide quinone reductase-like (yeast) (Sqrdl), mRNA.                                                        |
| scl059079.1 41-S     | 91.6699 | 7.91   | Erb2ip        | XM_358312.1 | Mus musculus Erb2 interacting protein (Erb2ip), mRNA.                                                                     |
| scl0093673.1 94-S    | 91.5732 | 1.98   | Cml2          | NM_053096.2 | Mus musculus camello-like 2 (Cml2), mRNA.                                                                                 |
| scl52515.14.1 211-S  | 91.4692 | 2.27   | 5730455O13Rik | XM_129261.5 | Mus musculus RIKEN cDNA 5730455O13 gene (5730455O13Rik), mRNA.                                                            |
| scl24219.2.1 21-S    | 91.1849 | 1.58   | 3110001D03Rik | NM_025849.2 | Mus musculus RIKEN cDNA 3110001D03 gene (3110001D03Rik), mRNA.                                                            |
| scl014779.1 116-S    | 91.0793 | 1.6    | Gpx4          | NM_008162   | Mus musculus glutathione peroxidase 4 (Gpx4), mRNA.                                                                       |
| scl0001816.1 0-S     | 91.0333 | 3.34   | Eif4a2        | XM_147230.1 | Mus musculus eukaryotic translation initiation factor 4A2 (Eif4a2), mRNA.                                                 |
| scl0002044.1 26-S    | 90.7313 | 1.77   | Alg5          | NM_025442.1 | Mus musculus asparagine-linked glycosylation 5 homolog (yeast, dolichyl-phosphate beta-glucosyltransferase) (Alg5), mRNA. |
| scl0066440.2 150-S   | 90.5231 | 22.13  | Cdc26         | NM_139291.1 | Mus musculus cell division cycle 26 (Cdc26), mRNA.                                                                        |
| scl072193.1 10-S     | 90.5064 | 2.01   | Sfrs2ip       | XM_128178.5 |                                                                                                                           |
| scl0001572.1 0-S     | 90.1946 | 1.97   | Rai12         | NM_018740.1 | Mus musculus retinoic acid induced 12 (Rai12), mRNA.                                                                      |
| scl50967.4 2-S       | 90.1313 | 2.05   | 0610011F06Rik | XM_128511   | Mus musculus RIKEN cDNA 0610011F06 gene (0610011F06Rik), mRNA.                                                            |
| scl011905.7 9-S      | 89.881  | 26.33  | Serpinc1      | NM_080844.2 | Mus musculus serine (or cysteine) proteinase inhibitor, clade C (antithrombin), member 1 (Serpinc1), mRNA.                |
| scl22909.7 136-S     | 89.7897 | 3.56   | 4921507I02Rik | XM_131022.4 | Mus musculus RIKEN cDNA 4921507I02 gene (4921507I02Rik), mRNA.                                                            |
| scl43097.11.1 34-S   | 89.7689 | 15.21  | Snapc1        | NM_178392.2 | Mus musculus small nuclear RNA activating complex, polypeptide 1 (Snapc1), mRNA.                                          |
| 18S_rRNA_X00686_523- | 89.5968 | 3.14   | Pigt          | NM_133779.1 | Mus musculus phosphatidylinositol glycan, class T (Pigt), mRNA.                                                           |
| scl0066552.1 146-S   | 89.2254 | 2.81   | 2010106G01Rik | NM_023220.1 | Mus musculus RIKEN cDNA 2010106G01 gene (2010106G01Rik), mRNA.                                                            |
| scl0002609.1 52-S    | 89.2089 | 20.08  | Psmb2         | NM_011970.2 | Mus musculus proteasome (prosome, macropain) subunit, beta type 2 (Psmb2), mRNA.                                          |
| scl53836.14 500-S    | 89.1931 | 19.48  | 4732479N06Rik | NM_172540.1 | Mus musculus RIKEN cDNA 4732479N06 gene (4732479N06Rik), mRNA.                                                            |
| scl02703.2 0-S       | 89.1345 | 2.25   | Serpina1d     | NM_009246.1 | Mus musculus serine (or cysteine) proteinase inhibitor, clade A, member 1d (Serpina1d), mRNA.                             |
| scl00280487.1 157-S  | 89.1156 | 30.35  | LOC280487     | NM_183299   | Mus musculus hypothetical protein LOC280487 (LOC280487), mRNA.                                                            |
| scl22733.6.2 0-S     | 88.964  | 2.45   | Gstm5         | NM_010360.1 | Mus musculus glutathione S-transferase, mu 5 (Gstm5), mRNA.                                                               |
| scl50198.3.1 17-S    | 88.9552 | 62.08  | Ndufb10       | XM_128594.4 | Mus musculus NADH dehydrogenase (ubiquinone) 1 beta subcomplex, 10 (Ndufb10), mRNA.                                       |
| scl0026367.1 126-S   | 88.9511 | 1.72   | Ceacam2       | NM_007543.2 | Mus musculus CEA-related cell adhesion molecule 2 (Ceacam2), mRNA.                                                        |
| scl022333.10 87-S    | 88.752  | 1.52   | Vdac1         | NM_011694   | Mus musculus voltage-dependent anion channel 1 (Vdac1), mRNA.                                                             |
| scl027207.2 8-S      | 88.7131 | 1.52   | Rps11         | XM_133477.1 | Mus musculus ribosomal protein S11 (Rps11), mRNA.                                                                         |
| scl49992.7.1 104-S   | 88.5161 | 21.86  | Aif1          | NM_019467.2 | Mus musculus allograft inflammatory factor 1 (Aif1), mRNA.                                                                |
| scl0272027.1 270-S   | 88.3407 | 22.73  | BC057893      | NM_173033.2 |                                                                                                                           |
| scl22876.3 595-S     | 88.3106 | 1.71   | Mcl1          | NM_008562.2 | Mus musculus myeloid cell leukemia sequence 1 (Mcl1), mRNA.                                                               |
| scl030933.5 3-S      | 88.2343 | 2.81   | Tor2a         | NM_152800.1 | Mus musculus torsin family 2, member A (Tor2a), mRNA.                                                                     |
| scl23055.15.1 74-S   | 88.1788 | 1.61   | Plrg1         | NM_016784.2 | Mus musculus pleiotropic regulator 1, PRL1 homolog (Arabidopsis) (Plrg1), mRNA.                                           |
| scl0171284.1 49-S    | 88.1415 | 3.05   | Timd2         | NM_134249   | Mus musculus T-cell immunoglobulin and mucin domain containing 2 (Timd2), mRNA.                                           |
| scl066483.1 326-S    | 88.0664 | 132.65 | Rpl36al       | NM_025589.1 | Mus musculus ribosomal protein L36a-like (Rpl36al), mRNA.                                                                 |
| scl067398.15 77-S    | 88.0378 | 2.99   | Srpr          | NM_026130.1 | Mus musculus signal recognition particle receptor (docking protein) (Srpr), mRNA.                                         |
| scl0003512.1 8-S     | 87.8081 | 12.18  | Hspa8         | NM_031165   | Mus musculus heat shock protein 8 (Hspa8), mRNA.                                                                          |
| scl50963.5.1 38-S    | 87.8031 | 1.56   | Mrp128        | NM_024227.2 | Mus musculus mitochondrial ribosomal protein L28 (Mrp128), nuclear gene encoding mitochondrial protein, mRNA.             |
| scl50134.9 8-S       | 87.7809 | 11.56  | Nudt3         | NM_019837.1 | Mus musculus nudix (nucleotide diphosphate linked moiety X)-type motif 3 (Nudt3), mRNA.                                   |
| scl0001683.1 11-S    | 87.741  | 2.56   | Skiv2l        | NM_178062.2 | Mus musculus superkiller viralicidic activity 2-like (S. cerevisiae) (Skiv2l), mRNA.                                      |
| scl41046.4.1 69-S    | 87.5745 | 19.14  | Cox11         | NM_199008.1 |                                                                                                                           |
| scl067437.2 28-S     | 87.5522 | 10.17  | Ssr3          | NM_026155.1 | Mus musculus signal sequence receptor, gamma (Ssr3), mRNA.                                                                |
| scl0022070.1 31-S    | 87.4038 | 44.71  | Tpt1          | NM_009429   | Mus musculus tumor protein, translationally-controlled 1 (Tpt1), mRNA.                                                    |
| scl0071900.2 287-S   | 87.2666 | 15.07  | 2310036D22Rik | NM_027992.1 | Mus musculus RIKEN cDNA 2310036D22 gene (2310036D22Rik), mRNA.                                                            |
| scl0001320.1 85-S    | 87.2336 | 3.42   | Mdh1          | NM_008618.2 | Mus musculus malate dehydrogenase 1, NAD (soluble) (Mdh1), mRNA.                                                          |
| scl52516.7.1 18-S    | 87.1022 | 8.73   | Rbp4          | NM_011255.1 | Mus musculus retinol binding protein 4, plasma (Rbp4), mRNA.                                                              |
| scl31909.4.1 14-S    | 87.0793 | 1.51   | 1190003J15Rik | XM_133915.3 | Mus musculus RIKEN cDNA 1190003J15 gene (1190003J15Rik), mRNA.                                                            |
| scl066860.1 6-S      | 86.9086 | 12.22  | 1200003E16Rik | XM_130249.3 | Mus musculus RIKEN cDNA 1200003E16 gene (1200003E16Rik), mRNA.                                                            |
| scl40141.3 333-S     | 86.8982 | 1.6    | 5730466P16Rik | NM_173453.1 | Mus musculus RIKEN cDNA 5730466P16 gene (5730466P16Rik), mRNA.                                                            |
| scl41635.8.225 0-S   | 86.6317 | 62.52  | Gnb2-rs1      | NM_008143.2 | Mus musculus guanine nucleotide binding protein, beta 2, related sequence 1 (Gnb2-rs1), mRNA.                             |
| scl26678.1 8 16-S    | 86.5964 | 1.79   | Cno           | NM_133724.2 | Mus musculus cappuccino (Cno), mRNA.                                                                                      |
| scl0108143.3 63-S    | 86.5596 | 21.87  | Taf9          | NM_027139.3 | Mus musculus TAF9 RNA polymerase II, TATA box binding protein (TBP)-associated factor (Taf9), mRNA.                       |
| scl016010.7 252-S    | 86.5445 | 1.51   | Igfbp4        | NM_010517.2 | Mus musculus insulin-like growth factor binding protein 4 (Igfbp4), mRNA.                                                 |
| scl25163.8.1 30-S    | 86.4864 | 1.54   | ORF18         | NM_029565.2 | Mus musculus open reading frame 18 (ORF18), mRNA.                                                                         |
| scl072656.1 14-S     | 86.3988 | 24.72  | 2810013E07Rik | NM_178112.3 | Mus musculus RIKEN cDNA 2810013E07 gene (2810013E07Rik), mRNA.                                                            |
| scl26422.6 429-S     | 86.3879 | 6.68   | 1300012D20Rik | NM_152811.1 | Mus musculus RIKEN cDNA 1300012D20 gene (1300012D20Rik), mRNA.                                                            |
| scl067941.3 4-S      | 86.3634 | 1.51   | Rps27l        | NM_026467.1 | Mus musculus ribosomal protein S27-like (Rps27l), mRNA.                                                                   |

|                     |         |       |               |             |                                                                                                                             |
|---------------------|---------|-------|---------------|-------------|-----------------------------------------------------------------------------------------------------------------------------|
| scl0012192.2 207-S  | 85.8562 | 4.72  | Zfp361l       | NM_007564.2 | Mus musculus zinc finger protein 36, C3H type-like 1 (Zfp361l), mRNA.                                                       |
| scl00107358.2 164-S | 85.7609 | 14.33 | Smbp          | NM_133352.1 | Mus musculus SM-11044 binding protein (Smbp), mRNA.                                                                         |
| scl35682.17.1 6-S   | 85.7308 | 22.78 | Snx1          | NM_019727.1 | Mus musculus sorting nexin 1 (Snx1), mRNA.                                                                                  |
| scl26423.7 124-S    | 85.6687 | 3.83  | Al788959      | NM_153598.1 | Mus musculus expressed sequence Al788959 (Al788959), mRNA.                                                                  |
| scl020818.1 29-S    | 85.6468 | 11.82 | Srprb         | NM_009275.2 | Mus musculus signal recognition particle receptor, B subunit (Srprb), mRNA.                                                 |
| scl40921.6 29-S     | 85.5731 | 1.59  | Igfbp4        | NM_010517.2 | Mus musculus insulin-like growth factor binding protein 4 (Igfbp4), mRNA.                                                   |
| scl070396.3 74-S    | 85.509  | 6.91  | 2210409M21Rik | NM_133728.2 | Mus musculus RIKEN cDNA 2210409M21 gene (2210409M21Rik), mRNA.                                                              |
| scl0012166.1 24-S   | 85.4545 | 2.97  | Bmpr1a        | NM_009758.3 | Mus musculus bone morphogenetic protein receptor, type 1A (Bmpr1a), mRNA.                                                   |
| scl0070456.1 86-S   | 85.2528 | 1.56  | 2610205H19Rik | NM_027430.1 | Mus musculus RIKEN cDNA 2610205H19 gene (2610205H19Rik), mRNA.                                                              |
| scl0066882.1 105-S  | 85.2128 | 2.02  | Bzw1          | NM_025824.2 | Mus musculus basic leucine zipper and W2 domains 1 (Bzw1), mRNA.                                                            |
| scl46370.4 89-S     | 85.1477 | 3.52  | Apex1         | NM_009687   | Mus musculus apurinic/apyrimidinic endonuclease 1 (Apex1), mRNA.                                                            |
| scl28573.11 3-S     | 85.0306 | 2.97  | Crbn          | NM_175357.1 |                                                                                                                             |
| scl33796.16.1 75-S  | 84.8012 | 3.13  | Aadat         | NM_011834.1 |                                                                                                                             |
| scl0069104.1 104-S  | 84.6643 | 2.24  | 2700055A20Rik | NM_027314.2 |                                                                                                                             |
| scl066177.1 13-S    | 84.4699 | 1.63  | Ubl5          | NM_025401.1 | Mus musculus ubiquitin-like 5 (Ubl5), mRNA.                                                                                 |
| scl066624.1 138-S   | 84.4599 | 22.98 | 5730406115Rik | NM_025668.1 | Mus musculus RIKEN cDNA 5730406115 gene (5730406115Rik), mRNA.                                                              |
| scl0014325.1 328-S  | 84.4202 | 3.89  | Ftl1          | NM_010240.1 | Mus musculus ferritin light chain 1 (Ftl1), mRNA.                                                                           |
| scl0001180.1 25-S   | 84.2334 | 4.22  | 1200009B18Rik | NM_026168.1 | Mus musculus RIKEN cDNA 1200009B18 gene (1200009B18Rik), mRNA.                                                              |
| scl014385.8 306-S   | 84.2306 | 6.74  | Slc37a4       | NM_008063.1 | Mus musculus solute carrier family 37 (glycerol-6-phosphate transporter), member 4 (Slc37a4), mRNA.                         |
| scl47445.7 14-S     | 84.2016 | 18.94 | Copz1         | NM_019817.1 | Mus musculus coatamer protein complex, subunit zeta 1 (Copz1), mRNA.                                                        |
| scl021991.1 200-S   | 84.1055 | 1.62  | Tpi1          | NM_009415.1 |                                                                                                                             |
| scl067025.2 6-S     | 83.8796 | 1.5   | Rpl11         | NM_025919   | Mus musculus ribosomal protein L11 (Rpl11), mRNA.                                                                           |
| scl36531.21.1 19-S  | 83.7126 | 2.22  | 5730439E10Rik | NM_175324.2 | Mus musculus RIKEN cDNA 5730439E10 gene (5730439E10Rik), mRNA.                                                              |
| scl0003079.1 4-S    | 83.6358 | 2.61  | Grb14         | NM_016719.1 | Mus musculus growth factor receptor bound protein 14 (Grb14), mRNA.                                                         |
| scl31009.10 67-S    | 83.626  | 1.54  | Dgat2         | NM_026384.2 | Mus musculus diacylglycerol O-acyltransferase 2 (Dgat2), mRNA.                                                              |
| scl24880.7 98-S     | 83.4248 | 3     | Sfrs4         | NM_020587.1 | Mus musculus splicing factor, arginine/serine-rich 4 (SRp75) (Sfrs4), mRNA.                                                 |
| scl0003137.1 53-S   | 83.3779 | 2.2   | Drbp1         | NM_178090.2 | Mus musculus developmentally regulated RNA binding protein 1 (Drbp1), mRNA.                                                 |
| scl0074252.2 11-S   | 83.331  | 15.55 | Armc1         | NM_028840.2 |                                                                                                                             |
| scl41277.14 78-S    | 83.1708 | 12.97 | AW550801      | NM_177325   | Mus musculus expressed sequence AW550801 (AW550801), mRNA.                                                                  |
| scl0020054.1 111-S  | 83.1364 | 1.7   | Rps15         | NM_009091.1 | Mus musculus ribosomal protein S15 (Rps15), mRNA.                                                                           |
| scl080795.5 227-S   | 83.0946 | 1.75  | Selk          | NM_019979.1 | Mus musculus selenoprotein K (Selk), mRNA.                                                                                  |
| scl20206.6 190-S    | 83.0925 | 15.41 | Dstn          | NM_019771.1 | Mus musculus destrin (Dstn), mRNA.                                                                                          |
| scl013138.1 18-S    | 82.9203 | 2.37  | Dag1          | NM_010017.1 | Mus musculus dystroglycan 1 (Dag1), mRNA.                                                                                   |
| scl020701.2 3-S     | 82.8678 | 2.28  | Serpina1b     | NM_009244.2 | Mus musculus serine (or cysteine) proteinase inhibitor, clade A, member 1b (Serpina1b), mRNA.                               |
| scl0001214.1 23-S   | 82.8158 | 12.21 | Slc25a13      | NM_015829.1 | Mus musculus solute carrier family 25 (mitochondrial carrier; adenine nucleotide translocator), member 13 (Slc25a13), mRNA. |
| scl0003132.1 48-S   | 82.8005 | 7.15  | 0610009I22Rik | NM_025646.2 | Mus musculus RIKEN cDNA 0610009I22 gene (0610009I22Rik), mRNA.                                                              |
| scl23667.4 0-S      | 82.6471 | 1.89  | Pnrc2         | NM_026383.1 | Mus musculus proline-rich nuclear receptor coactivator 2 (Pnrc2), mRNA.                                                     |
| scl45536.7.1 0-S    | 82.6355 | 13.66 | Tm9sf1        | NM_028780.2 | Mus musculus transmembrane 9 superfamily member 1 (Tm9sf1), mRNA.                                                           |
| scl018984.16 308-S  | 82.6212 | 2.65  | Por           | NM_008898.1 | Mus musculus P450 (cytochrome) oxidoreductase (Por), mRNA.                                                                  |
| scl34858.4 85-S     | 82.5716 | 6.75  | Slc25a4       | XM_134169.4 | Mus musculus solute carrier family 25 (mitochondrial carrier; adenine nucleotide translocator), member 4 (Slc25a4), mRNA.   |
| scl0218333.1 228-S  | 82.5404 | 3.72  | BC018507      | XM_358313.1 | Mus musculus cDNA sequence BC018507 (BC018507), mRNA.                                                                       |
| scl0021974.1 259-S  | 82.4734 | 17.42 | Top2b         | NM_009409.2 | Mus musculus topoisomerase (DNA) II beta (Top2b), mRNA.                                                                     |
| scl014319.1 33-S    | 82.3969 | 1.66  | Fth1          | NM_010239.1 |                                                                                                                             |
| scl51108.6.3 0-S    | 82.3769 | 1.71  | Sod2          | NM_013671.2 | Mus musculus superoxide dismutase 2, mitochondrial (Sod2), mRNA.                                                            |
| scl0002518.1 2-S    | 82.2853 | 15.04 | Mrpl13        | NM_026759.2 | Mus musculus mitochondrial ribosomal protein L13 (Mrpl13), mRNA.                                                            |
| scl18935.13 58-S    | 82.2765 | 9.85  | Cat           | NM_009804   | Mus musculus catalase (Cat), mRNA.                                                                                          |
| scl018703.11 156-S  | 82.0705 | 1.88  | Pigr          | NM_011082.2 | Mus musculus polymeric immunoglobulin receptor (Pigr), mRNA.                                                                |
| scl00097112.2 117-S | 82.0685 | 2.7   | C87860        | NM_133787.1 | Mus musculus expressed sequence C87860 (C87860), mRNA.                                                                      |
| scl17685.8.520 25-S | 82.0528 | 3.47  | Spp2          | NM_029269.1 |                                                                                                                             |
| scl52081.14 14-S    | 81.9897 | 1.74  | Ik            | NM_011879.1 | Mus musculus IK cytokine (Ik), mRNA.                                                                                        |
| scl33163.3.1 18-S   | 81.9302 | 1.74  | 1810063B05Rik | NM_174987.2 | Mus musculus RIKEN cDNA 1810063B05 gene (1810063B05Rik), mRNA.                                                              |
| scl0002578.1 9-S    | 81.8994 | 1.51  | Eif3s6ip      | NM_145139.1 | Mus musculus eukaryotic translation initiation factor 3, subunit 6 interacting protein (Eif3s6ip), mRNA.                    |
| scl32101.7.1 5-S    | 81.8147 | 3.55  | D7Wsu128e     | NM_138589   | Mus musculus DNA segment, Chr 7, Wayne State University 128, expressed (D7Wsu128e), mRNA.                                   |
| scl0223631.4 104-S  | 81.6768 | 1.64  | BC025446      | NM_146058.1 | Mus musculus cDNA sequence BC025446 (BC025446), mRNA.                                                                       |
| scl28784.6 160-S    | 81.5564 | 1.65  | Tex261        | NM_009357.1 | Mus musculus testis expressed gene 261 (Tex261), mRNA.                                                                      |
| scl26403.11.1 10-S  | 81.3938 | 5.61  | Gc            | XM_132170.2 | Mus musculus group specific component (Gc), mRNA.                                                                           |

|                       |         |       |               |             |                                                                                                                                               |
|-----------------------|---------|-------|---------------|-------------|-----------------------------------------------------------------------------------------------------------------------------------------------|
| scl011430.3 98-S      | 81.3113 | 24.82 | Acox1         | NM_015729   | Mus musculus acyl-Coenzyme A oxidase 1, palmitoyl (Acox1), mRNA.                                                                              |
| scl0002225.1 0-S      | 81.3085 | 14.6  | Srp19         | NM_025527.1 | Mus musculus signal recognition particle 19 (Srp19), mRNA.                                                                                    |
| scl0066849.1 145-S    | 81.2467 | 2.09  | Ppp1r2        | NM_025800.1 | Mus musculus protein phosphatase 1, regulatory (inhibitor) subunit 2 (Ppp1r2), mRNA.                                                          |
| scl0012116.2 283-S    | 81.0775 | 12.29 | Bhmt          | NM_016668.2 | Mus musculus betaine-homocysteine methyltransferase (Bhmt), mRNA.                                                                             |
| scl24398.4.1 27-S     | 81.0734 | 1.68  | Hint2         | XM_143732.2 |                                                                                                                                               |
| scl40603.7.49 6-S     | 80.9414 | 1.65  | Drg1          | NM_007879.1 | Mus musculus developmentally regulated GTP binding protein 1 (Drg1), mRNA.                                                                    |
| scl0022608.1 233-S    | 80.8666 | 1.49  | Nsep1         | NM_011732.1 | Mus musculus nuclease sensitive element binding protein 1 (Nsep1), mRNA.                                                                      |
| scl0001631.1 196-S    | 80.7895 | 12.56 | Rpo1-1        | NM_009085.1 | Mus musculus RNA polymerase 1-1 (Rpo1-1), mRNA.                                                                                               |
| scl36904.3.10 19-S    | 80.7816 | 1.74  | Cox5a         | NM_007747   | Mus musculus cytochrome c oxidase, subunit Va (Cox5a), mRNA.                                                                                  |
| scl19951.7 95-S       | 80.5669 | 2.06  | Ywhab         | NM_018753.3 | Mus musculus tyrosine 3-monooxygenase/tryptophan 5-monooxygenase activation protein, beta polypeptide (Ywhab), mRNA.                          |
| scl52979.12 115-S     | 80.5424 | 1.71  | Pdcd4         | NM_011050   | Mus musculus programmed cell death 4 (Pdcd4), mRNA.                                                                                           |
| scl0053413.2 143-S    | 80.3505 | 2.14  | Exoc7         | NM_016857.1 | Mus musculus exocyst complex component 7 (Exoc7), mRNA.                                                                                       |
| scl46000.3 481-S      | 80.2517 | 2.69  | Ndfip2        | NM_029561.1 | Mus musculus Nedd4 family interacting protein 2 (Ndfip2), mRNA.                                                                               |
| scl0218100.1 36-S     | 80.2256 | 14.84 | Zfp322a       | NM_172586.2 | Mus musculus zinc finger protein 322a (Zfp322a), mRNA.                                                                                        |
| scl38525.3.714 1-S    | 80.0521 | 13.01 | Ube2n         | NM_080560.2 | Mus musculus ubiquitin-conjugating enzyme E2N (Ube2n), mRNA.                                                                                  |
| scl42858.13 56-S      | 79.8387 | 2.14  | Rin3          | NM_177620.2 | Mus musculus Ras and Rab interactor 3 (Rin3), mRNA.                                                                                           |
| scl012825.37 20-S     | 79.7209 | 23.99 | Col3a1        | NM_009930.1 | Mus musculus procollagen, type III, alpha 1 (Col3a1), mRNA.                                                                                   |
| scl40005.7.1 7-S      | 79.5194 | 1.8   | Rai12         | NM_018740.1 | Mus musculus retinoic acid induced 12 (Rai12), mRNA.                                                                                          |
| scl0067921.2 259-S    | 79.4608 | 1.78  | 2510010F15Rik | NM_026454.2 | Mus musculus RIKEN cDNA 2510010F15 gene (2510010F15Rik), mRNA.                                                                                |
| scl000061.1 90 REVCOM | 79.4531 | 4.42  | Nme7          | NM_138314.1 | Mus musculus non-metastatic cells 7, protein expressed in (Nme7), mRNA.                                                                       |
| scl068193.4 35-S      | 79.435  | 1.48  | Rpl24         | NM_024218.2 | Mus musculus ribosomal protein L24 (Rpl24), mRNA.                                                                                             |
| scl00104681.2 288-S   | 79.377  | 6.41  | Slc16a6       | NM_134038.1 | Mus musculus solute carrier family 16 (monocarboxylic acid transporters), member 6 (Slc16a6), mRNA.                                           |
| scl0116891.1 127-S    | 79.333  | 2.81  | BC005682      | NM_033562.2 | Mus musculus cDNA sequence BC005682 (BC005682), mRNA.                                                                                         |
| scl50160.5.1 23-S     | 79.3069 | 1.53  | BC008155      | NM_145410.1 | Mus musculus cDNA sequence BC008155 (BC008155), mRNA.                                                                                         |
| scl000709.1 10-S      | 79.2408 | 7.62  | Fbxo8         | NM_015791.2 | Mus musculus F-box only protein 8 (Fbxo8), mRNA.                                                                                              |
| scl42461.3 0-S        | 79.081  | 19.25 | Cif2          | NM_007688.1 | Mus musculus cofilin 2, muscle (Cif2), mRNA.                                                                                                  |
| scl013680.2 48-S      | 78.8301 | 3.48  | Ddx19         | NM_007916.1 | Mus musculus DEAD (Asp-Glu-Ala-Asp) box polypeptide 19 (Ddx19), mRNA.                                                                         |
| scl54140.7.1 25-S     | 78.804  | 5.01  | Dnase111      | NM_027109.1 |                                                                                                                                               |
| scl16210.3.1 71-S     | 78.6121 | 2.26  | Cfh1          | NM_015780.1 | Mus musculus complement component factor h-like 1 (Cfh1), mRNA.                                                                               |
| scl23680.13 149-S     | 78.5662 | 1.82  | 1110007C24Rik | NM_025382.3 | Mus musculus RIKEN cDNA 1110007C24 gene (1110007C24Rik), mRNA.                                                                                |
| scl18994.12.1 7-S     | 78.5461 | 1.55  | F2            | NM_010168.1 | Mus musculus coagulation factor II (F2), mRNA.                                                                                                |
| scl0104771.9 30-S     | 78.4277 | 1.8   | 1200003C05Rik | NM_024205.1 | Mus musculus RIKEN cDNA 1200003C05 gene (1200003C05Rik), mRNA.                                                                                |
| scl0003772.1 20-S     | 78.3204 | 2.11  | Pex7          | NM_008822.1 | Mus musculus peroxisome biogenesis factor 7 (Pex7), mRNA.                                                                                     |
| scl46082.11 140-S     | 78.31   | 11.96 | Tgfb14        | NM_009366.1 | Mus musculus transforming growth factor beta 1 induced transcript 4 (Tgfb14), mRNA.                                                           |
| scl018139.26 3-S      | 78.275  | 1.71  | Zfml          | NM_008717.1 |                                                                                                                                               |
| scl0002689.1 21-S     | 78.2584 | 2.31  | 2210021A15Rik | NM_173719.1 | Mus musculus RIKEN cDNA 2210021A15 gene (2210021A15Rik), mRNA.                                                                                |
| scl067130.2 3-S       | 78.1684 | 13.97 | Ndufa6        | NM_025987.1 | Mus musculus NADH dehydrogenase (ubiquinone) 1 alpha subcomplex, 6 (B14) (Ndufa6), mRNA.                                                      |
| scl50689.6 424-S      | 78.0741 | 1.66  | Slc35b1       | XM_128634.4 | Mus musculus solute carrier family 35, member B1 (Slc35b1), mRNA.                                                                             |
| scl0066310.1 231-S    | 77.9983 | 1.75  | 2810410M20Rik | NM_024428.2 | Mus musculus RIKEN cDNA 2810410M20 gene (2810410M20Rik), mRNA.                                                                                |
| scl0002381.1 12-S     | 77.8602 | 1.71  | Dhrs7         | NM_025522.1 | Mus musculus dehydrogenase/reductase (SDR family) member 7 (Dhrs7), mRNA.                                                                     |
| scl46398.42.1 4-S     | 77.8342 | 13.24 | Ktn1          | NM_008477   | Mus musculus kinesin 1 (Ktn1), mRNA.                                                                                                          |
| scl38289.2 239-S      | 77.7949 | 1.75  | Apof          | NM_133997.1 | Mus musculus apolipoprotein F (Apof), mRNA.                                                                                                   |
| scl50399.22 481-S     | 77.7654 | 3.93  | Ttc7          | NM_028639   | Mus musculus tetra-tryptophan repeat domain 7 (Ttc7), mRNA.                                                                                   |
| scl17134.7 259-S      | 77.6811 | 2.73  | BC031781      | NM_145943.1 | Mus musculus cDNA sequence BC031781 (BC031781), mRNA.                                                                                         |
| scl33150.17.997 2-S   | 77.625  | 1.64  | Ilgb1         | NM_010578.1 | Mus musculus integrin beta 1 (fibronectin receptor beta) (Ilgb1), mRNA.                                                                       |
| scl020700.1 2-S       | 77.6011 | 10.85 | Serpina1a     | NM_009243   | Mus musculus serine (or cysteine) proteinase inhibitor, clade A, member 1a (Serpina1a), mRNA.                                                 |
| scl45531.6.1 0-S      | 77.5446 | 1.53  | Nedd8         | NM_008683   | Mus musculus neural precursor cell expressed, developmentally down-regulated gene 8 (Nedd8), mRNA.                                            |
| scl0055946.2 3-S      | 77.5389 | 24.03 | Ap3m1         | NM_018829.2 | Mus musculus adaptor-related protein complex 3, mu 1 subunit (Ap3m1), mRNA.                                                                   |
| scl015473.1 6-S       | 77.4828 | 48.22 | Hrsp12        | NM_008287.2 | Mus musculus heat-responsive protein 12 (Hrsp12), mRNA.                                                                                       |
| scl36601.18.1 52-S    | 77.3969 | 4.11  | Atr           | XM_356175.1 |                                                                                                                                               |
| scl078325.1 150-S     | 77.2667 | 1.59  | 2700092H06Rik | XM_132529.2 | Mus musculus RIKEN cDNA 2700092H06 gene (2700092H06Rik), mRNA.                                                                                |
| scl20056.4.1 63-S     | 77.009  | 1.7   | Map1lc3a      | NM_025735.1 | Mus musculus microtubule-associated protein 1 light chain 3 alpha (Map1lc3a), mRNA.                                                           |
| scl0003820.1 78-S     | 76.9718 | 2.29  | Chpt1         | NM_144807.2 | Mus musculus choline phosphotransferase 1 (Chpt1), mRNA.                                                                                      |
| scl48807.5.1 32-S     | 76.8107 | 4.95  | Magmas        | NM_025571.1 | Mus musculus mitochondria-associated protein involved in granulocyte-macrophage colony-stimulating factor signal transduction (Magmas), mRNA. |
| scl40203.12 25-S      | 76.7583 | 16.02 | Sparc         | NM_009242   | Mus musculus secreted acidic cysteine rich glycoprotein (Sparc), mRNA.                                                                        |
| scl0269261.4 12-S     | 76.7463 | 2.32  | Rpl12         | NM_009076   | Mus musculus ribosomal protein L12 (Rpl12), mRNA.                                                                                             |

|                |       |         |       |               |             |                                                                                                                     |
|----------------|-------|---------|-------|---------------|-------------|---------------------------------------------------------------------------------------------------------------------|
| scl28628.30    | 135-S | 76.7366 | 43.12 | Frmd4b        | NM_145148.1 |                                                                                                                     |
| scl023837.2    | 17-S  | 76.6998 | 1.76  | Cldp1         | NM_011801.1 |                                                                                                                     |
| scl24987.27.1  | 4-S   | 76.67   | 16.49 | Inpp5b        | NM_008385.3 | Mus musculus inositol polyphosphate-5-phosphatase B (Inpp5b), mRNA.                                                 |
| scl34540.19    | 229-S | 76.575  | 1.64  | Vps35         | NM_022997   | Mus musculus vacuolar protein sorting 35 (Vps35), mRNA.                                                             |
| scl0003896.1   | 252-S | 76.5693 | 1.76  | Igf1          | NM_010512   | Mus musculus insulin-like growth factor 1 (Igf1), mRNA.                                                             |
| scl32630.18    | 440-S | 76.5564 | 2.22  | Hrmt1i3       | NM_133740.1 | Mus musculus heterogeneous nuclear ribonucleoprotein methyltransferase-like 3 (S. cerevisiae) (Hrmt1i3), mRNA.      |
| scl44323.5.1   | 4-S   | 76.5153 | 2.71  | Paip1         | NM_145457.2 | Mus musculus polyadenylate binding protein-interacting protein 1 (Paip1), mRNA.                                     |
| scl013095.9    | 315-S | 76.4187 | 36.02 | Cyp2c29       | NM_007815   | Mus musculus cytochrome P450, family 2, subfamily c, polypeptide 29 (Cyp2c29), mRNA.                                |
| scl31074.15.1  | 32-S  | 76.3341 | 1.46  | Fah           | NM_010176.1 | Mus musculus fumarylacetoacetate hydrolase (Fah), mRNA.                                                             |
| scl021665.1    | 179-S | 76.0794 | 13.48 | Tdg           | NM_172552.1 | Mus musculus thymine DNA glycosylase (Tdg), mRNA.                                                                   |
| scl014050.16   | 119-S | 75.9731 | 12.19 | Eya3          | NM_010166.2 | Mus musculus eyes absent 3 homolog (Drosophila) (Eya3), transcript variant 2, mRNA.                                 |
| scl46440.4.1   | 161-S | 75.9494 | 2.08  | Lrrc21        | NM_146245.1 | Mus musculus leucine rich repeat containing 21 (Lrrc21), mRNA.                                                      |
| scl44635.2.1   | 29-S  | 75.9124 | 3.58  | Mrp136        | NM_053163.1 | Mus musculus mitochondrial ribosomal protein L36 (Mrp136), mRNA.                                                    |
| scl0067288.2   | 208-S | 75.8775 | 12.24 | 3110031B13Rik | NM_026075.1 | Mus musculus RIKEN cDNA 3110031B13 gene (3110031B13Rik), mRNA.                                                      |
| scl51564.13.1  | 155-S | 75.7449 | 1.46  | Proc          | NM_008934.1 | Mus musculus protein C (Proc), mRNA.                                                                                |
| scl0012870.2   | 25-S  | 75.6171 | 16.12 | Cp            | NM_007752.1 | Mus musculus ceruloplasmin (Cp), mRNA.                                                                              |
| scl0012453.1   | 227-S | 75.5599 | 15.77 | Ccni          | NM_017367.2 | Mus musculus cyclin 1 (Ccni), mRNA.                                                                                 |
| scl0019684.1   | 297-S | 75.5546 | 13.89 | Rdx           | NM_009041.1 | Mus musculus radixin (Rdx), mRNA.                                                                                   |
| scl38374.10.1  | 58-S  | 75.3363 | 1.48  | 0610007H07Rik | NM_026617.1 | Mus musculus RIKEN cDNA 0610007H07 gene (0610007H07Rik), mRNA.                                                      |
| scl53686.6.11  | 16-S  | 75.2535 | 1.49  | Prdx4         | NM_016764.1 | Mus musculus peroxiredoxin 4 (Prdx4), mRNA.                                                                         |
| scl0019943.2   | 84-S  | 75.1324 | 1.47  | Rpl28         | NM_009081.1 | Mus musculus ribosomal protein L28 (Rpl28), mRNA.                                                                   |
| scl27078.4.1   | 81-S  | 75.0718 | 1.62  | 0910001L09Rik | XM_132434.2 | Mus musculus RIKEN cDNA 0910001L09 gene (0910001L09Rik), mRNA.                                                      |
| scl29751.3     | 94-S  | 75.0174 | 2.83  | Klf15         | NM_023184.2 | Mus musculus Kruppel-like factor 15 (Klf15), mRNA.                                                                  |
| scl34487.14.1  | 100-S | 74.9927 | 51.72 | Ces1          | NM_021456.1 | Mus musculus carboxylesterase 1 (Ces1), mRNA.                                                                       |
| scl0067184.2   | 306-S | 74.8743 | 1.92  | Grim19        | NM_023312.1 | Mus musculus genes associated with retinoid-IFN-induced mortality 19 (Grim19), mRNA.                                |
| scl50027.4.1   | 35-S  | 74.6916 | 36.87 | Psmb9         | NM_013585.1 | Mus musculus proteasome (prosome, macropain) subunit, beta type 9 (large multifunctional protease 2) (Psmb9), mRNA. |
| scl31392.8.1   | 11-S  | 74.6249 | 1.49  | Fcgrt         | NM_010189   | Mus musculus Fc receptor, IgG, alpha chain transporter (Fcgrt), mRNA.                                               |
| scl54257.9.1   | 23-S  | 74.5268 | 16.04 | Gpc4          | NM_008150.1 | Mus musculus glypican 4 (Gpc4), mRNA.                                                                               |
| scl012558.4    | 4-S   | 74.518  | 14.61 | Cdh2          | NM_007664.1 | Mus musculus cadherin 2 (Cdh2), mRNA.                                                                               |
| scl014007.1    | 13-S  | 74.4124 | 4.15  | Cugbp2        | NM_010160.1 | Mus musculus CUG triplet repeat, RNA binding protein 2 (Cugbp2), mRNA.                                              |
| scl50155.9     | 2-S   | 74.3249 | 11.83 | Decr2         | NM_011933.1 | Mus musculus 2-4-dienoyl-Coenzyme A reductase 2, peroxisomal (Decr2), mRNA.                                         |
| scl068552.1    | 11-S  | 74.2968 | 1.84  | 1110003E01Rik | NM_133697.1 | Mus musculus RIKEN cDNA 1110003E01 gene (1110003E01Rik), mRNA.                                                      |
| scl000857.1    | 11-S  | 74.2033 | 1.46  | Hsd11b1       | NM_008288.1 | Mus musculus hydroxysteroid 11-beta dehydrogenase 1 (Hsd11b1), mRNA.                                                |
| scl0230126.1   | 281-S | 74.1679 | 25.52 | Shb           | XM_131399.4 | Mus musculus src homology 2 domain-containing transforming protein B (Shb), mRNA.                                   |
| scl0019224.1   | 106-S | 74.0659 | 8     | Ptgs1         | NM_008969.1 | Mus musculus prostaglandin-endoperoxide synthase 1 (Ptgs1), mRNA.                                                   |
| scl0107686.2   | 24-S  | 73.9878 | 1.63  | Snrpd2        | XM_133225.1 | Mus musculus small nuclear ribonucleoprotein D2 (Snrpd2), mRNA.                                                     |
| scl0014390.1   | 51-S  | 73.9095 | 14.07 | Gabpa         | NM_008065.2 | Mus musculus GA repeat binding protein, alpha (Gabpa), mRNA.                                                        |
| scl0012928.2   | 60-S  | 73.8695 | 13.12 | Crk           | NM_133656.2 | Mus musculus v-crk sarcoma virus CT10 oncogene homolog (avian) (Crk), mRNA.                                         |
| scl000669.1    | 31-S  | 73.8513 | 1.49  | Gpsn2         | NM_134118.1 | Mus musculus glycoprotein, synaptic 2 (Gpsn2), mRNA.                                                                |
| scl066144.2    | 329-S | 73.8248 | 1.49  | Atp6v1f       | NM_025381   | Mus musculus ATPase, H+ transporting, V1 subunit F (Atp6v1f), mRNA.                                                 |
| scl34673.5.1   | 43-S  | 73.763  | 2.01  | Bst2          | NM_198095.1 |                                                                                                                     |
| scl42484.15.73 | 1-S   | 73.7317 | 12.48 | Strn3         | NM_052973.1 | Mus musculus striatin, calmodulin binding protein 3 (Strn3), mRNA.                                                  |
| scl013132.15   | 5-S   | 73.6441 | 2.28  | Dab2          | NM_023118.1 | Mus musculus disabled homolog 2 (Drosophila) (Dab2), mRNA.                                                          |
| scl000929.1    | 30-S  | 73.4205 | 2.54  | Ugt1a6        | NM_145079   | Mus musculus UDP glycosyltransferase 1 family, polypeptide A6 (Ugt1a6), mRNA.                                       |
| scl18254.7.1   | 9-S   | 73.408  | 2.4   | Ctsz          | NM_022325.3 | Mus musculus cathepsin Z (Ctsz), mRNA.                                                                              |
| scl00021.1     | 10-S  | 73.2381 | 2.36  | Apoc1         | NM_007469.2 | Mus musculus apolipoprotein C-I (Apoc1), mRNA.                                                                      |
| scl0016158.2   | 239-S | 73.2123 | 2.04  | Il11ra2       | NM_010550   | Mus musculus interleukin 11 receptor, alpha chain 2 (Il11ra2), mRNA.                                                |
| scl52549.14    | 1-S   | 73.1793 | 1.78  | Atad1         | NM_026487.2 | Mus musculus ATPase family, AAA domain containing 1 (Atad1), mRNA.                                                  |
| scl0014857.1   | 108-S | 73.1048 | 23.18 | Gsta1         | NM_008181.1 | Mus musculus glutathione S-transferase, alpha 1 (Ya) (Gsta1), mRNA.                                                 |
| scl012457.3    | 248-S | 72.8743 | 19.59 | Ccrn4l        | NM_009834.1 | Mus musculus CCR4 carbon catabolite repression 4-like (S. cerevisiae) (Ccrn4l), mRNA.                               |
| scl018521.14   | 30-S  | 72.8216 | 1.46  | Pcbp2         | NM_011042.1 | Mus musculus poly(rC) binding protein 2 (Pcbp2), mRNA.                                                              |
| scl19291.9.1   | 25-S  | 72.7544 | 17.18 | Nmi           | NM_019401.1 | Mus musculus N-myc (and STAT) interactor (Nmi), mRNA.                                                               |
| scl020922.5    | 83-S  | 72.5611 | 2.58  | Supt4h        | NM_009296.1 | Mus musculus suppressor of Ty 4 homolog (S. cerevisiae) (Supt4h), mRNA.                                             |
| scl18631.16    | 116-S | 72.433  | 15.22 | Slc23a2       | NM_018824.2 | Mus musculus solute carrier family 23 (nucleobase transporters), member 2 (Slc23a2), mRNA.                          |
| scl000377.1    | 101-S | 72.3315 | 1.71  | Adk           | NM_134079.1 | Mus musculus adenosine kinase (Adk), mRNA.                                                                          |
| scl0394435.7   | 126-S | 72.1855 | 1.45  | Ugt1a9        | NM_201410   |                                                                                                                     |

|               |          |         |       |               |             |                                                                                                   |
|---------------|----------|---------|-------|---------------|-------------|---------------------------------------------------------------------------------------------------|
| scl19566.6.1  | 18-S     | 71.882  | 2.09  | Dpp7          | NM_031843.2 | Mus musculus dipeptidylpeptidase 7 (Dpp7), mRNA.                                                  |
| scl33841.11   | 453-S    | 71.8758 | 1.83  | Irf2          | NM_008391.2 | Mus musculus interferon regulatory factor 2 (Irf2), mRNA.                                         |
| scl31001.17.1 | 88-S     | 71.8724 | 1.66  | Sloc2b1       | NM_175316.2 | Mus musculus solute carrier organic anion transporter family, member 2b1 (Sloc2b1), mRNA.         |
| scl0059043.2  | 22-S     | 71.8659 | 1.65  | Wsb2          | NM_021539.3 | Mus musculus WD repeat and SOCS box-containing 2 (Wsb2), mRNA.                                    |
| scl21598.9.1  | 53-S     | 71.8629 | 2.95  | Snx7          | XM_131162.3 | Mus musculus sorting nexin 7 (Snx7), mRNA.                                                        |
| scl0056392.1  | 211-S    | 71.7316 | 2.09  | Shoc2         | NM_019658.2 | Mus musculus soc-2 (suppressor of clear) homolog (C. elegans) (Shoc2), mRNA.                      |
| scl022218.1   | 29-S     | 71.5582 | 1.46  | Sumo1         | NM_009460.1 |                                                                                                   |
| scl0020455.1  | 36-S     | 71.5139 | 2.47  | Sif1          |             |                                                                                                   |
| scl19560.8.1  | 32-S     | 71.5118 | 1.81  | 1700013L23Rik | XM_130127.3 | Mus musculus RIKEN cDNA 1700013L23 gene (1700013L23Rik), mRNA.                                    |
| scl068011.3   | 46-S     | 71.5047 | 1.49  | Snrpg         | NM_026506.1 | Mus musculus small nuclear ribonucleoprotein polypeptide G (Snrpg), mRNA.                         |
| scl011813.3   | 68-S     | 71.4959 | 1.72  | Apoc2         | NM_009695.2 | Mus musculus apolipoprotein C-II (Apoc2), mRNA.                                                   |
| scl0022218.1  | 0-S      | 71.3992 | 2.82  | Sumo1         | NM_009460.1 |                                                                                                   |
| scl42244.15   | 187-S    | 71.3922 | 2.36  | Aldh6a1       | NM_134042.1 | Mus musculus aldehyde dehydrogenase family 6, subfamily A1 (Aldh6a1), mRNA.                       |
| scl00228829.1 | 258-S    | 71.3048 | 12.97 | 6820402O20Rik | XM_133187.4 | Mus musculus RIKEN cDNA 6820402O20 gene (6820402O20Rik), mRNA.                                    |
| scl35908.8    | 513-S    | 71.2544 | 4.45  | 4432416J03Rik | NM_030069   | Mus musculus RIKEN cDNA 4432416J03 gene (4432416J03Rik), mRNA.                                    |
| scl31737.12   | 81-S     | 71.2309 | 4.3   | 2810007J24Rik | NM_175250.3 | Mus musculus RIKEN cDNA 2810007J24 gene (2810007J24Rik), mRNA.                                    |
| scl068576.4   | 100-S    | 71.2026 | 2.05  | Hbxip         | XM_131076.1 |                                                                                                   |
| scl026912.9   | 26-S     | 71.168  | 2.25  | Gcat          | NM_013847   | Mus musculus glycine C-acetyltransferase (2-amino-3-ketobutyrate-coenzyme A ligase) (Gcat), mRNA. |
| scl0011652.2  | 199-S    | 71.0001 | 1.77  | Akt2          | NM_007434.2 | Mus musculus thymoma viral proto-oncogene 2 (Akt2), mRNA.                                         |
| scl29907.19   | 469-S    | 70.9612 | 3.57  | Eif2ak3       | NM_010121.1 | Mus musculus eukaryotic translation initiation factor 2 alpha kinase 3 (Eif2ak3), mRNA.           |
| scl36033.13   | 6-S      | 70.8846 | 1.52  | Ei24          | NM_007915   | Mus musculus etoposide induced 2.4 mRNA (Ei24), mRNA.                                             |
| scl0019205.2  | 0-S      | 70.8483 | 1.59  | Ptbp1         | NM_008956.1 | Mus musculus polypyrimidine tract binding protein 1 (Ptbp1), mRNA.                                |
| scl0003189.1  | 25-S     | 70.8145 | 1.48  | 2010323F13Rik | NM_177157.2 | Mus musculus RIKEN cDNA 2010323F13 gene (2010323F13Rik), mRNA.                                    |
| scl30008.5    | 1-S      | 70.7384 | 2.45  | Aqp1          | NM_007472.1 | Mus musculus aquaporin 1 (Aqp1), mRNA.                                                            |
| scl27178.12   | 102 2-S  | 70.4289 | 1.48  | Cct6a         | NM_009838   | Mus musculus chaperonin subunit 6a (zeta) (Cct6a), mRNA.                                          |
| scl0067151.2  | 31-S     | 70.4154 | 6.81  | Psmd9         | NM_026000.1 | Mus musculus proteasome (prosome, macropain) 26S subunit, non-ATPase, 9 (Psmd9), mRNA.            |
| scl00268301.1 | 190-S    | 70.4061 | 4.79  | 4921515A04Rik | NM_172939.2 | Mus musculus RIKEN cDNA 4921515A04 gene (4921515A04Rik), mRNA.                                    |
| scl24979.20   | 1 9-S    | 70.3888 | 2.37  | Gnl2          | NM_145552   |                                                                                                   |
| scl30756.4    | 28 1-S   | 70.3864 | 2.13  | Coq7          | NM_009940.1 | Mus musculus demethyl-Q 7 (Coq7), mRNA.                                                           |
| scl0013195.2  | 156-S    | 70.3664 | 2.46  | Ddc           | NM_016672.1 | Mus musculus dopa decarboxylase (Ddc), mRNA.                                                      |
| scl016155.8   | 10-S     | 70.1493 | 5.06  | Il10rb        | NM_008349.1 | Mus musculus interleukin 10 receptor, beta (Il10rb), mRNA.                                        |
| scl011844.1   | 12-S     | 70.0836 | 1.86  | Arf5          | NM_007480.1 | Mus musculus ADP-ribosylation factor 5 (Arf5), mRNA.                                              |
| scl019073.1   | 109-S    | 70.0813 | 11.11 | Prg           | NM_011157.1 |                                                                                                   |
| scl22663.19   | 1 25-S   | 69.9451 | 27.62 | Bcar3         | NM_013867.1 | Mus musculus breast cancer anti-estrogen resistance 3 (Bcar3), mRNA.                              |
| scl44313.2.1  | 9-S      | 69.8855 | 2.43  | Akr1c12       | NM_013777.1 | Mus musculus aldo-keto reductase family 1, member C12 (Akr1c12), mRNA.                            |
| scl0002744.1  | 1 1-S    | 69.6105 | 1.78  | Zfyve9        | XM_131643.4 |                                                                                                   |
| scl0269399.1  | 1-S      | 69.5727 | 10.84 | 6720461J16Rik | NM_175551.2 | Mus musculus RIKEN cDNA 6720461J16 gene (6720461J16Rik), mRNA.                                    |
| scl20633.35   | 1 246-S  | 69.3662 | 1.87  | Lrp4          | NM_172668.2 | Mus musculus low density lipoprotein receptor-related protein 4 (Lrp4), mRNA.                     |
| scl067270.3   | 15-S     | 69.2118 | 1.58  | D10Ert322e    | NM_026065.2 |                                                                                                   |
| scl000898.1   | 12-S     | 69.122  | 1.77  | Ivns1abp      | NM_054102.1 | Mus musculus influenza virus NS1A binding protein (Ivns1abp), mRNA.                               |
| scl45103.13   | 79-S     | 69.1164 | 11.92 | 9030611N15Rik | NM_134072.1 | Mus musculus RIKEN cDNA 9030611N15 gene (9030611N15Rik), mRNA.                                    |
| scl0001439.1  | 101-S    | 69.0049 | 2.43  | Ube2g1        | NM_025985.2 | Mus musculus ubiquitin-conjugating enzyme E2G 1 (UBC7 homolog, C. elegans) (Ube2g1), mRNA.        |
| scl52798.4.1  | 101-S    | 68.9799 | 2.07  | Nudt8         | NM_025529.2 | Mus musculus nudix (nucleoside diphosphate linked moiety X)-type motif 8 (Nudt8), mRNA.           |
| scl0065111.1  | 63-S     | 68.969  | 1.47  | Dap3          | NM_022994.2 | Mus musculus death associated protein 3 (Dap3), mRNA.                                             |
| scl52741.7    | 234-S    | 68.7982 | 2.32  | 1110006115Rik | NM_134142.1 | Mus musculus RIKEN cDNA 1110006115 gene (1110006115Rik), mRNA.                                    |
| scl16257.7    | 73 24-S  | 68.7509 | 1.58  | Timm17a       | NM_011590.1 | Mus musculus translocator of inner mitochondrial membrane 17a (Timm17a), mRNA.                    |
| scl0022034.1  | 201-S    | 68.7119 | 2.6   | Traf6         | NM_009424.2 | Mus musculus Tnf receptor-associated factor 6 (Traf6), mRNA.                                      |
| scl00103694.2 | 279-S    | 68.7111 | 2.25  | 1110014L17Rik | NM_134020.1 | Mus musculus RIKEN cDNA 1110014L17 gene (1110014L17Rik), mRNA.                                    |
| scl076938.2   | 0-S      | 68.5676 | 1.86  | Rbm17         | NM_152824.1 | Mus musculus RNA binding motif protein 17 (Rbm17), mRNA.                                          |
| scl00319263.1 | 175-S    | 68.5651 | 10.93 | A030012M09Rik | NM_183028.1 | Mus musculus RIKEN cDNA A030012M09 gene (A030012M09Rik), mRNA.                                    |
| scl21950.8.1  | 214-S    | 68.4295 | 1.49  | Mtx1          | NM_013604.1 | Mus musculus metaxin 1 (Mtx1), mRNA.                                                              |
| scl53770.17   | 1 35-S   | 68.2234 | 4.12  | Acsl4         | NM_207625.1 | Mus musculus acyl-CoA synthetase long-chain family member 4 (Acsl4), transcript variant 2, mRNA.  |
| scl0021763.1  | 228-S    | 68.2161 | 1.73  | Tex2          | NM_198292.2 | Mus musculus testis expressed gene 2 (Tex2), mRNA.                                                |
| scl45748.3    | 30-S     | 68.036  | 3.32  | 2610018L09Rik | NM_172254.2 |                                                                                                   |
| scl28314.7    | 1 1 50-S | 68.0166 | 4     | 2010012C16Rik | NM_025564.1 | Mus musculus RIKEN cDNA 2010012C16 gene (2010012C16Rik), mRNA.                                    |
| scl0013046.1  | 235-S    | 67.941  | 1.99  | Cugbp1        | NM_198683.1 | Mus musculus CUG triplet repeat, RNA binding protein 1 (Cugbp1), transcript variant 2, mRNA.      |

|                     |         |       |               |             |                                                                                                                     |
|---------------------|---------|-------|---------------|-------------|---------------------------------------------------------------------------------------------------------------------|
| sci054624.14_263-S  | 67.6697 | 1.95  | 5730511K23Rik | NM_019458.2 | Mus musculus RIKEN cDNA 5730511K23 gene (5730511K23Rik), mRNA.                                                      |
| sci54158.7.21_44-S  | 67.4874 | 32.03 | Bcap31        | NM_012060.2 | Mus musculus B-cell receptor-associated protein 31 (Bcap31), mRNA.                                                  |
| sci0106583.1_2-S    | 67.3919 | 3.97  | Rbm16         | NM_134123.2 | Mus musculus RNA binding motif protein 16 (Rbm16), mRNA.                                                            |
| sci45100.10.1_14-S  | 67.3054 | 42.17 | Akr1c6        | NM_030611.1 | Mus musculus aldo-keto reductase family 1, member C6 (Akr1c6), mRNA.                                                |
| sci35083.10.1_128-S | 67.2963 | 15.96 | Grtp1         | NM_025768.1 | Mus musculus GH regulated TBC protein 1 (Grtp1), mRNA.                                                              |
| sci057808.2_82-S    | 67.2876 | 3.68  | Rpl35a        | NM_021338.2 | Mus musculus ribosomal protein L35a (Rpl35a), mRNA.                                                                 |
| sci20520.4_157-S    | 67.1897 | 11.03 | 0610012H03Rik | NM_028747.1 | Mus musculus RIKEN cDNA 0610012H03 gene (0610012H03Rik), mRNA.                                                      |
| sci35429.19.1_59-S  | 67.0611 | 1.59  | 1300017J02Rik | NM_027918.1 | Mus musculus RIKEN cDNA 1300017J02 gene (1300017J02Rik), mRNA.                                                      |
| sci0001099.1_185-S  | 66.964  | 12.72 | St7           | NM_022332.1 | Mus musculus suppression of tumorigenicity 7 (St7), mRNA.                                                           |
| sci45771.22.1_206-S | 66.8976 | 1.69  | Iih1          | NM_008406.1 | Mus musculus inter-alpha trypsin inhibitor, heavy chain 1 (Iih1), mRNA.                                             |
| sci41761.12.1_9-S   | 66.8797 | 9.93  | FancL         | NM_025923.2 | Mus musculus Fanconi anemia, complementation group L (FancL), mRNA.                                                 |
| sci16803.9_203-S    | 66.8479 | 1.46  | Slc40a1       | NM_016917.1 | Mus musculus solute carrier family 40 (iron-regulated transporter), member 1 (Slc40a1), mRNA.                       |
| sci0002326.1_69-S   | 66.7615 | 6.26  | Rab10         | NM_016676.2 | Mus musculus RAB10, member RAS oncogene family (Rab10), mRNA.                                                       |
| sci27877.10.4_15-S  | 66.5863 | 2.69  | Lyar          | NM_025281.1 | Mus musculus Ly1 antibody reactive clone (Lyar), mRNA.                                                              |
| sci43154.2_481-S    | 66.5454 | 1.82  | Arf6          | NM_007481.1 | Mus musculus ADP-ribosylation factor 6 (Arf6), mRNA.                                                                |
| sci0002742.1_56-S   | 66.5302 | 2.64  | Slc31a1       | NM_175090   | Mus musculus solute carrier family 31, member 1 (Slc31a1), mRNA.                                                    |
| sci36120.9.10_29-S  | 66.5019 | 13.4  | Acp5          | NM_007388.1 | Mus musculus acid phosphatase 5, tartrate resistant (Acp5), mRNA.                                                   |
| sci26971.4.541_0-S  | 66.4295 | 1.79  | Rpo1-3        | NM_009087.1 | Mus musculus RNA polymerase 1-3 (Rpo1-3), mRNA.                                                                     |
| sci077219.10_12-S   | 66.3659 | 2.52  | Zadh1         | NM_029880.1 |                                                                                                                     |
| sci055949.3_17-S    | 66.3618 | 1.74  | Eef1b2        | NM_018796.2 | Mus musculus eukaryotic translation elongation factor 1 beta 2 (Eef1b2), mRNA.                                      |
| sci40848.1_563-S    | 66.3146 | 2.91  | Clp1          | NM_138753.1 | Mus musculus cardiac lineage protein 1 (Clp1), mRNA.                                                                |
| sci19106.4.1_16-S   | 66.0496 | 11.65 | Fkbp7         | NM_010222.1 | Mus musculus FK506 binding protein 7 (Fkbp7), mRNA.                                                                 |
| sci055960.6_109-S   | 65.8453 | 12.51 | Ebag9         | NM_019480.3 | Mus musculus estrogen receptor-binding fragment-associated gene 9 (Ebag9), mRNA.                                    |
| sci50495.21.3_143-S | 65.8009 | 7.75  | 2610511O17Rik | NM_152817.2 | Mus musculus RIKEN cDNA 2610511O17 gene (2610511O17Rik), mRNA.                                                      |
| sci066878.10_113-S  | 65.5871 | 1.48  | RioK3         | NM_024182.2 | Mus musculus RIO kinase 3 (yeast) (RioK3), mRNA.                                                                    |
| sci014113.7_42-S    | 65.58   | 1.55  | Fbl           | NM_007991.2 | Mus musculus fibrillarlin (Fbl), mRNA.                                                                              |
| sci46290.12.1_1-S   | 65.5606 | 1.82  | 1500001L15Rik | XM_127738.3 | Mus musculus RIKEN cDNA 1500001L15 gene (1500001L15Rik), mRNA.                                                      |
| sci0066212.1_0-S    | 65.5184 | 2.67  | Sec61b        | NM_024171.1 | Mus musculus Sec61 beta subunit (Sec61b), mRNA.                                                                     |
| sci0017692.2_146-S  | 65.4085 | 10.32 | Msl31         | NM_010832.2 | Mus musculus male-specific lethal-3 homolog 1 (Drosophila) (Msl31), mRNA.                                           |
| sci011848.5_0-S     | 65.3929 | 1.87  | Rhoa          | NM_016802   | Mus musculus ras homolog gene family, member A (Rhoa), mRNA.                                                        |
| sci0211660.12_302-S | 65.3652 | 6.74  | LOC211660     | XM_129366.4 |                                                                                                                     |
| sci41198.10_516-S   | 65.352  | 1.44  | Poldip2       | NM_026389.2 | Mus musculus polymerase (DNA-directed), delta interacting protein 2 (Poldip2), mRNA.                                |
| sci00040.1_6-S      | 65.3151 | 5.33  | Mef2a         | NM_013597.2 | Mus musculus myocyte enhancer factor 2A (Mef2a), transcript variant 1, mRNA.                                        |
| sci25159.19.1_9-S   | 65.3037 | 3     | 2810475A17Rik | NM_028355.1 | Mus musculus RIKEN cDNA 2810475A17 gene (2810475A17Rik), mRNA.                                                      |
| sci18252.2_52-S     | 65.286  | 62.72 | Atp5e         | NM_025983.2 | Mus musculus ATP synthase, H+ transporting, mitochondrial F1 complex, epsilon subunit (Atp5e), mRNA.                |
| sci00223455.2_26-S  | 65.1513 | 2.31  | F830029L24Rik | NM_172606.1 | Mus musculus RIKEN cDNA F830029L24 gene (F830029L24Rik), mRNA.                                                      |
| sci0067452.2_1-S    | 64.974  | 1.55  | 1200006O19Rik | NM_026164.1 | Mus musculus RIKEN cDNA 1200006O19 gene (1200006O19Rik), mRNA.                                                      |
| sci30499.14.1_7-S   | 64.9485 | 1.42  | Rnh1          | NM_145135.2 | Mus musculus ribonuclease/angiogenesis inhibitor 1 (Rnh1), mRNA.                                                    |
| sci19759.21.1_156-S | 64.8867 | 1.6   | 2610031L17Rik | NM_133701.1 | Mus musculus RIKEN cDNA 2610031L17 gene (2610031L17Rik), mRNA.                                                      |
| sci0066105.2_68-S   | 64.7426 | 3.14  | Ube2d3        | NM_025356.2 | Mus musculus ubiquitin-conjugating enzyme E2D 3 (UBC4/5 homolog, yeast) (Ube2d3), mRNA.                             |
| sci066190.1_22-S    | 64.7069 | 3.03  | Phca          | NM_025408.1 | Mus musculus phytoceramidase, alkaline (Phca), mRNA.                                                                |
| sci23040.14.1_27-S  | 64.63   | 2.34  | Pet112l       | NM_144896.2 | Mus musculus PET112-like (yeast) (Pet112l), mRNA.                                                                   |
| sci35678.16.1_29-S  | 64.5016 | 2.02  | Usp3          | NM_144937.2 | Mus musculus ubiquitin specific protease 3 (Usp3), mRNA.                                                            |
| sci052840.5_2-S     | 64.3388 | 1.71  | D2Bwg0891e    | NM_026797.1 | Mus musculus DNA segment, Chr 2, Brigham & Womens Genetics 0891 expressed (D2Bwg0891e), mRNA.                       |
| sci014109.3_67-S    | 64.3148 | 1.57  | Fau           | NM_007990   | Mus musculus Finkel-Biskis-Reilly murine sarcoma virus (FBR-MuSV) ubiquitously expressed (fox derived) (Fau), mRNA. |
| sci0059069.1_170-S  | 64.2895 | 2.39  | Tpm3          | NM_022314.2 | Mus musculus tropomyosin 3, gamma (Tpm3), mRNA.                                                                     |
| sci38416.13.1_1-S   | 64.2881 | 2.37  | Ptprb         | NM_029928.1 | Mus musculus protein tyrosine phosphatase, receptor type, B (Ptprb), mRNA.                                          |
| sci066302.10_6-S    | 64.2698 | 13.6  | 2410005O16Rik | NM_025476.3 | Mus musculus RIKEN cDNA 2410005O16 gene (2410005O16Rik), mRNA.                                                      |
| sci0014682.1_7-S    | 64.2437 | 1.8   | Gnaq          | NM_008139.2 | Mus musculus guanine nucleotide binding protein, alpha q polypeptide (Gnaq), mRNA.                                  |
| sci0076846.1_142-S  | 64.2186 | 1.52  | 3010033P07Rik | NM_029767.1 |                                                                                                                     |
| sci066989.6_1-S     | 64.2043 | 2.49  | 2410004N11Rik | NM_025888.2 | Mus musculus RIKEN cDNA 2410004N11 gene (2410004N11Rik), mRNA.                                                      |
| sci20194.20.1_79-S  | 64.1904 | 9.21  | Sec23b        | NM_019787.2 | Mus musculus SEC23B (S. cerevisiae) (Sec23b), mRNA.                                                                 |
| sci19661.4.1_12-S   | 64.132  | 1.85  | Ptpla         | NM_013935.1 | Mus musculus protein tyrosine phosphatase-like (proline instead of catalytic arginine), member A (Ptpla), mRNA.     |
| sci0001193.1_40-S   | 64.1312 | 13.65 | Pon3          | NM_173006.1 | Mus musculus paroxonase 3 (Pon3), mRNA.                                                                             |
| sci0321022.1_67-S   | 64.1028 | 1.47  | Cdv3          | NM_175833.1 | Mus musculus carnitine deficiency-associated gene expressed in ventricle 3 (Cdv3), mRNA.                            |
| sci00103850.1_287-S | 64.0594 | 1.58  | Nt5m          | NM_134029.1 | Mus musculus 5,3-nucleotidase, mitochondrial (Nt5m), mRNA.                                                          |

|                |       |         |       |               |                   |                                                                                                            |
|----------------|-------|---------|-------|---------------|-------------------|------------------------------------------------------------------------------------------------------------|
| sc1018416.10   | 18-S  | 64.0071 | 5.83  | Otc           | NM_008769.2       | Mus musculus ornithine transcarbamylase (Otc), mRNA.                                                       |
| sc134701.2.1   | 7-S   | 63.9302 | 1.99  | 2810428I15Rik | XM_147329.1       | Mus musculus RIKEN cDNA 2810428I15 gene (2810428I15Rik), mRNA.                                             |
| sc141548.2.100 | 36-S  | 63.9253 | 1.64  | Hint1         | NM_008248.1       | Mus musculus histidine triad nucleotide binding protein 1 (Hint1), mRNA.                                   |
| sc152961.19    | 173-S | 63.8648 | 6.99  | Add3          | NM_013758.2       | Mus musculus adducin 3 (gamma) (Add3), mRNA.                                                               |
| sc1068767.10   | 282-S | 63.8226 | 6     | ORF19         | XM_128709.4       | Mus musculus open reading frame 19 (ORF19), mRNA.                                                          |
| sc100109054.1  | 86-S  | 63.8055 | 4.51  | Pfdn4         | XM_355370         | Mus musculus pefoldin 4 (Pfdn4), mRNA.                                                                     |
| sc10002310.1   | 66-S  | 63.7907 | 1.67  | 1110057K04Rik | NM_172401.2       | Mus musculus RIKEN cDNA 1110057K04 gene (1110057K04Rik), mRNA.                                             |
| sc10001779.1   | 17-S  | 63.7708 | 1.98  | Eif4a2        | NM_013506         | Mus musculus eukaryotic translation initiation factor 4A2 (Eif4a2), mRNA.                                  |
| sc10002028.1   | 25-S  | 63.6832 | 1.52  | 2310066N05Rik | NM_027371.1       | Mus musculus RIKEN cDNA 2310066N05 gene (2310066N05Rik), mRNA.                                             |
| sc10106338.2   | 0-S   | 63.6519 | 12.34 | Nsun3         | NM_178925.2       |                                                                                                            |
| sc119394.13    | 183-S | 63.6019 | 4.48  | Ggta1         | NM_010283.1       | Mus musculus glycoprotein galactosyltransferase alpha 1, 3 (Ggta1), mRNA.                                  |
| sc10067443.1   | 283-S | 63.4993 | 2.92  | Map1lc3b      | NM_026160         | Mus musculus microtubule-associated protein 1 light chain 3 beta (Map1lc3b), mRNA.                         |
| sc10003171.1   | 33-S  | 63.3331 | 1.86  | Psmb7         | NM_011187.1       | Mus musculus proteasome (prosome, macropain) subunit, beta type 7 (Psmb7), mRNA.                           |
| sc132562.20.1  | 76-S  | 63.2912 | 1.62  | 1600012K10Rik | NM_025905.2       | Mus musculus RIKEN cDNA 1600012K10 gene (1600012K10Rik), mRNA.                                             |
| sc1000978.1    | 0-S   | 63.1123 | 1.53  | Cops5         | NM_013715.1       | Mus musculus COP9 (constitutive photomorphogenic) homolog, subunit 5 (Arabidopsis thaliana) (Cops5), mRNA. |
| sc10017841.1   | 127-S | 63.0985 | 12.07 | Mup2          | NM_008647         | Mus musculus major urinary protein 2 (Mup2), mRNA.                                                         |
| sc10002188.1   | 58-S  | 63.0931 | 11.92 | Riok3         | NM_024182.2       | Mus musculus RIO kinase 3 (yeast) (Riok3), mRNA.                                                           |
| sc131573.3     | 3-S   | 63.0612 | 1.47  | Mrps12        | NM_011885         | Mus musculus mitochondrial ribosomal protein S12 (Mrps12), mRNA.                                           |
| sc148556.8.1   | 18-S  | 63.0437 | 1.47  | 2010319C14Rik | NM_024464.2       | Mus musculus RIKEN cDNA 2010319C14 gene (2010319C14Rik), mRNA.                                             |
| sc134607.9     | 25-S  | 63.0139 | 2.42  | Smad1         | NM_008539.3       |                                                                                                            |
| sc127364.5.1   | 30-S  | 62.9681 | 1.57  | Sfrs9         | NM_025573.2       | Mus musculus splicing factor, arginine/serine rich 9 (Sfrs9), mRNA.                                        |
| sc133788.4.1   | 0-S   | 62.9535 | 1.66  | BC009118      | NM_145595.1       | Mus musculus cDNA sequence BC009118 (BC009118), mRNA.                                                      |
| sc10065246.1   | 38-S  | 62.9508 | 6.14  | Xpo7          | NM_023045.1       | Mus musculus exportin 7 (Xpo7), mRNA.                                                                      |
| sc119516.4.19  | 7-S   | 62.8706 | 2.09  | Surf1         | NM_013677.1       | Mus musculus surfet gene 1 (Surf1), mRNA.                                                                  |
| sc1066935.3    | 28-S  | 62.8565 | 3.21  | 1700023B02Rik | NM_025854.1       | Mus musculus RIKEN cDNA 1700023B02 gene (1700023B02Rik), mRNA.                                             |
| sc1016432.2    | 9-S   | 62.7792 | 1.41  | Itm2b         | NM_008410.1       | Mus musculus integral membrane protein 2B (Itm2b), mRNA.                                                   |
| sc10015481.2   | 296-S | 62.7218 | 2.4   | Hspa8         | NM_031165.3       | Mus musculus heat shock protein 8 (Hspa8), mRNA.                                                           |
| sc125435.3.1   | 50-S  | 62.6505 | 10.99 | Nipsnap3b     | NM_025623.1       |                                                                                                            |
| sc10235072.13  | 139-S | 62.6025 | 14.86 |               | 39332 NM_009859.2 | Mus musculus septin 7 (Sept7), mRNA.                                                                       |
| sc100394432.2  | 137-S | 62.4709 | 1.44  | Ugt1a10       | NM_201642         |                                                                                                            |
| sc131512.7.1   | 16-S  | 62.4385 | 1.46  | 5033425B17Rik | NM_027215         | Mus musculus RIKEN cDNA 5033425B17 gene (5033425B17Rik), mRNA.                                             |
| sc153365.18.1  | 112-S | 62.4175 | 1.43  | Prp19         | NM_134129.2       | Mus musculus PRP19/PSO4 homolog (S. cerevisiae) (Prp19), mRNA.                                             |
| sc1018648.4    | 76-S  | 62.2341 | 49.45 | Pgam1         | NM_023418.1       | Mus musculus phosphoglycerate mutase 1 (Pgam1), mRNA.                                                      |
| sc150670.2.184 | 270-S | 62.1709 | 1.51  | 2310039H08Rik | NM_025966.2       | Mus musculus RIKEN cDNA 2310039H08 gene (2310039H08Rik), mRNA.                                             |
| sc10076055.1   | 48-S  | 61.9075 | 5.57  | Mgea5         | NM_023799.2       | Mus musculus meningioma expressed antigen 5 (hyaluronidase) (Mgea5), mRNA.                                 |
| sc100268448.1  | 163-S | 61.904  | 13.45 | Phf12         | NM_174852.2       | Mus musculus PHD finger protein 12 (Phf12), mRNA.                                                          |
| sc10015130.1   | 284-S | 61.81   | 7.53  | Hbb-b2        | NM_016956.2       | Mus musculus hemoglobin, beta adult minor chain (Hbb-b2), mRNA.                                            |
| sc131589.11.1  | 58-S  | 61.7718 | 1.55  | Psmc4         | NM_011874.1       | Mus musculus proteasome (prosome, macropain) 26S subunit, ATPase, 4 (Psmc4), mRNA.                         |
| sc1069470.6    | 81-S  | 61.7691 | 1.99  | 2310003P10Rik | NM_175145.2       | Mus musculus RIKEN cDNA 2310003P10 gene (2310003P10Rik), mRNA.                                             |
| sc1027681.7    | 4-S   | 61.7549 | 2.65  | D11Moh34      | NM_033568.1       | Mus musculus DNA segment, Chr 11, KL Mohlke 34 (D11Moh34), mRNA.                                           |
| sc149610.9.216 | 11-S  | 61.7365 | 1.68  | Fez2          | NM_199448.1       | Mus musculus fasciculation and elongation protein zeta 2 (zygyn II) (Fez2), mRNA.                          |
| sc120006.8     | 238-S | 61.6998 | 4.2   | 2610304G08Rik | NM_027434         | Mus musculus RIKEN cDNA 2610304G08 gene (2610304G08Rik), mRNA.                                             |
| sc1017836.34   | 27-S  | 61.5092 | 2.06  | Mug1          | NM_008645         | Mus musculus murinoglobulin 1 (Mug1), mRNA.                                                                |
| sc10067845.2   | 211-S | 61.471  | 15.02 | Zfp364        | NM_026406.2       | Mus musculus zinc finger protein 364 (Zfp364), mRNA.                                                       |
| sc149994.7.1   | 30-S  | 61.3466 | 1.45  | Apom          | NM_018816         | Mus musculus apolipoprotein M (Apom), mRNA.                                                                |
| sc1066594.3    | 10-S  | 61.3361 | 1.71  | Uqcr          | NM_025650.1       | Mus musculus ubiquinol-cytochrome c reductase (6.4kD) subunit (Uqcr), mRNA.                                |
| sc10076281.1   | 330-S | 61.3218 | 1.66  | Tax1bp3       | NM_029564         |                                                                                                            |
| sc100009.1     | 36-S  | 61.315  | 1.53  | Vti1b         | NM_016800.2       | Mus musculus arginase type II (Arg2), mRNA.                                                                |
| sc10014528.1   | 45-S  | 61.2978 | 1.84  | Gch1          | NM_008102.2       |                                                                                                            |
| sc1067938.1    | 193-S | 61.2792 | 1.52  | Mylc2b        | NM_023402.1       |                                                                                                            |
| sc1014897.1    | 33-S  | 61.2483 | 1.94  | Trip12        | NM_133975.2       |                                                                                                            |
| sc100230257.2  | 191-S | 61.2357 | 11.6  | Rod1          | NM_144904.1       | Mus musculus ROD1 regulator of differentiation 1 (S. pombe) (Rod1), mRNA.                                  |
| sc10072193.1   | 269-S | 61.1832 | 4.01  | Sfrs2ip       | XM_128178.5       |                                                                                                            |
| sc145482.13    | 126-S | 61.1291 | 2.54  | 1110008L20Rik | NM_028643.1       | Mus musculus RIKEN cDNA 1110008L20 gene (1110008L20Rik), mRNA.                                             |
| sc149249.30    | 34-S  | 61.1286 | 7.1   | Dlgh1         | NM_007862.2       | Mus musculus discs, large homolog 1 (Drosophila) (Dlgh1), mRNA.                                            |
| sc116734.10.1  | 6-S   | 60.89   | 37.64 | Clk1          | NM_009905.1       |                                                                                                            |



|               |       |         |         |               |               |                                                                                                   |                                                                               |
|---------------|-------|---------|---------|---------------|---------------|---------------------------------------------------------------------------------------------------|-------------------------------------------------------------------------------|
| scI0170768.1  | 23-S  | 60.8859 | 2.9     | Pfkfb3        | NM_172976.1   | Mus musculus 6-phosphofructo-2-kinase/fructose-2,6-bisphosphatase 3 (Pfkfb3), mRNA.               |                                                                               |
| scI018477.6   | 2-S   | 60.7606 | 1.4     | Prdx1         | NM_011034.2   | Mus musculus peroxiredoxin 1 (Prdx1), mRNA.                                                       |                                                                               |
| scI068024.2   | 210-S | 60.759  | 63.64   | Hist1h2bc     | NM_023422.1   | Mus musculus histone 1, H2bc (Hist1h2bc), mRNA.                                                   |                                                                               |
| scI37421.7    | 120-S | 60.7366 | 6.57    | Rassf3        | NM_138956     | Mus musculus Ras association (RalGDS/AF-6) domain family 3 (Rassf3), mRNA.                        |                                                                               |
| scI000646.1   | 33-S  | 60.7362 | 2.04    | 2310061C15Rik | NM_026844.2   |                                                                                                   |                                                                               |
| scI0001267.1  | 72-S  | 60.662  | 5.4     | Drg1          | NM_007879.1   | Mus musculus developmentally regulated GTP binding protein 1 (Drg1), mRNA.                        |                                                                               |
| scI023980.1   | 2-S   | 60.6343 | 1.97    | Pbp           | NM_018858.1   | Mus musculus phosphatidylethanolamine binding protein (Pbp), mRNA.                                |                                                                               |
| scI071750.18  | 235-S | 60.6008 | 17.22   | 1300003K24Rik | NM_027900.2   | Mus musculus RIKEN cDNA 1300003K24 gene (1300003K24Rik), mRNA.                                    |                                                                               |
| scI48561.1    | 13    | 8-S     | 60.5449 | 1.73          | 0610012G03Rik | NM_025320                                                                                         | Mus musculus RIKEN cDNA 0610012G03 gene (0610012G03Rik), mRNA.                |
| scI47211.15   | 135-S | 60.5325 | 13.07   | Rad21         | NM_009009.2   | Mus musculus RAD21 homolog (S. pombe) (Rad21), mRNA.                                              |                                                                               |
| scI066979.1   | 124-S | 60.4163 | 3.48    | Pole4         | NM_025882.1   | Mus musculus polymerase (DNA-directed), epsilon 4 (p12 subunit) (Pole4), mRNA.                    |                                                                               |
| scI067788.3   | 30-S  | 60.2846 | 14.5    | 6330577E15Rik | NM_026377.1   | Mus musculus RIKEN cDNA 6330577E15 gene (6330577E15Rik), mRNA.                                    |                                                                               |
| scI47686.9    | 164-S | 60.2039 | 3.29    | Cyp2d9        | NM_010006.1   | Mus musculus cytochrome P450, family 2, subfamily d, polypeptide 9 (Cyp2d9), mRNA.                |                                                                               |
| scI41592.12   | 1     | 36-S    | 60.0901 | 2.1           | 2900006B13Rik | NM_028398.1                                                                                       | Mus musculus RIKEN cDNA 2900006B13 gene (2900006B13Rik), mRNA.                |
| scI22700.8    | 1     | 2-S     | 60.0391 | 3.87          | Olfm3         | NM_153157.1                                                                                       | Mus musculus olfactomedin 3 (Olfm3), transcript variant B, mRNA.              |
| scI22078.18   | 184-S | 59.9763 | 7.63    | Kpna4         | NM_008467.2   | Mus musculus karyopherin (importin) alpha 4 (Kpna4), mRNA.                                        |                                                                               |
| scI28293.6    | 1     | 86-S    | 59.8521 | 1.58          | Hebp1         | NM_013546.1                                                                                       | Mus musculus heme binding protein 1 (Hebp1), mRNA.                            |
| scI25480.9    | 1     | 148-S   | 59.7757 | 1.46          | Grhpr         | NM_080289.1                                                                                       | Mus musculus glyoxylate reductase/hydroxypruvate reductase (Grhpr), mRNA.     |
| scI0067225.1  | 69-S  | 59.7297 | 11.43   | 2810441O16Rik | NM_026043.2   | Mus musculus RIKEN cDNA 2810441O16 gene (2810441O16Rik), mRNA.                                    |                                                                               |
| scI067332.3   | 15-S  | 59.7296 | 1.63    | Snrpd3        | NM_026095.3   | Mus musculus small nuclear ribonucleoprotein D3 (Snrpd3), mRNA.                                   |                                                                               |
| scI006691.1   | 167-S | 59.7258 | 1.52    | 4432404J10Rik | NM_025709.2   | Mus musculus RIKEN cDNA 4432404J10 gene (4432404J10Rik), mRNA.                                    |                                                                               |
| scI00108687.2 | 201-S | 59.7009 | 1.44    | 9530090G24Rik | NM_145537.1   | Mus musculus RIKEN cDNA 9530090G24 gene (9530090G24Rik), mRNA.                                    |                                                                               |
| scI067876.4   | 28-S  | 59.6625 | 3.31    | 1500041J02Rik | NM_026424.2   | Mus musculus RIKEN cDNA 1500041J02 gene (1500041J02Rik), mRNA.                                    |                                                                               |
| scI0026900.1  | 130-S | 59.6283 | 8.54    | Ddx3y         | NM_012008.1   | Mus musculus DEAD (Asp-Glu-Ala-Asp) box polypeptide 3, Y-linked (Ddx3y), mRNA.                    |                                                                               |
| scI20901.1    | 1     | 2-S     | 59.503  | 2.34          | Upp2          | NM_029692.1                                                                                       | Mus musculus uridine phosphorylase 2 (Upp2), mRNA.                            |
| scI011480.11  | 306-S | 59.4363 | 13.17   | Acvr2         | NM_007396.2   | Mus musculus activin receptor IIA (Acvr2), mRNA.                                                  |                                                                               |
| scI056334.4   | 3-S   | 59.3974 | 1.78    | 1110032D12Rik | NM_019770     | Mus musculus RIKEN cDNA 1110032D12 gene (1110032D12Rik), mRNA.                                    |                                                                               |
| scI54170.6    | 1     | 1-S     | 59.2813 | 6.53          | Cetn2         | NM_019405.5                                                                                       | Mus musculus centrin 2 (Cetn2), mRNA.                                         |
| scI40305.32   | 46-S  | 59.2267 | 4.68    | Cyfp2         | XM_147526.1   | Mus musculus cytoplasmic FMR1 interacting protein 2 (Cyfp2), mRNA.                                |                                                                               |
| scI000094.1   | 33    | REVCOM  | 59.0709 | 1.58          | Mea1          | NM_010787.1                                                                                       | Mus musculus male enhanced antigen 1 (Mea1), mRNA.                            |
| scI46904.9    | 7-S   | 59.0131 | 1.48    | Poldip3       | NM_178627.1   | Mus musculus polymerase (DNA-directed), delta interacting protein 3 (Poldip3), mRNA.              |                                                                               |
| scI017992.3   | 16-S  | 58.9186 | 1.4     | Ndufa4        | NM_010886.1   | Mus musculus NADH dehydrogenase (ubiquinone) 1 alpha subcomplex, 4 (Ndufa4), mRNA.                |                                                                               |
| scI27967.7    | 1     | 149-S   | 58.9119 | 1.6           | Abhd1         | NM_021304.2                                                                                       | Mus musculus abhydrolase domain containing 1 (Abhd1), mRNA.                   |
| scI019683.5   | 201-S | 58.8294 | 2.16    | Rdh6          | NM_009040.1   | Mus musculus retinol dehydrogenase 6 (Rdh6), mRNA.                                                |                                                                               |
| scI022791.10  | 3-S   | 58.7772 | 12.58   | Dnajc2        | NM_009583     | Mus musculus DnaJ (Hsp40) homolog, subfamily C, member 2 (Dnajc2), mRNA.                          |                                                                               |
| scI0330401.1  | 15-S  | 58.7668 | 4.14    | 3632431M01Rik | XM_132843.5   | Mus musculus RIKEN cDNA 3632431M01 gene (3632431M01Rik), mRNA.                                    |                                                                               |
| scI056282.5   | 222-S | 58.7562 | 1.5     | Mrpl12        | NM_027204.2   | Mus musculus mitochondrial ribosomal protein L12 (Mrpl12), mRNA.                                  |                                                                               |
| scI22131.3    | 16-S  | 58.7522 | 13.55   | D3Ucla1       | NM_030685.1   | Mus musculus DNA segment, Chr 3, University of California at Los Angeles 1 (D3Ucla1), mRNA.       |                                                                               |
| scI0012859.2  | 116-S | 58.7322 | 1.39    | Cox5b         | NM_009942.1   | Mus musculus cytochrome c oxidase, subunit Vb (Cox5b), mRNA.                                      |                                                                               |
| scI0067166.2  | 227-S | 58.7149 | 1.8     | Arl10c        | NM_026011.2   | Mus musculus ADP-ribosylation factor-like 10C (Arl10c), mRNA.                                     |                                                                               |
| scI30978.11   | 3-S   | 58.6914 | 2.6     | Plekhb1       | NM_013746.1   | Mus musculus pleckstrin homology domain containing, family B (evectins) member 1 (Plekhb1), mRNA. |                                                                               |
| scI20555.7    | 24    | 72-S    | 58.6863 | 2.09          | Mmrp19        | NM_019735.2                                                                                       |                                                                               |
| scI068501.6   | 11-S  | 58.6506 | 3.27    | 1110014D18Rik | NM_026746.1   | Mus musculus RIKEN cDNA 1110014D18 gene (1110014D18Rik), mRNA.                                    |                                                                               |
| scI015107.1   | 301-S | 58.6379 | 2.92    | Hadhsc        | NM_008212.1   | Mus musculus L-3-hydroxyacyl-Coenzyme A dehydrogenase, short chain (Hadhsc), mRNA.                |                                                                               |
| scI50795.8    | 1     | 75-S    | 58.6193 | 9.65          | Ddah2         | NM_016765                                                                                         | Mus musculus dimethylarginine dimethylaminohydrolase 2 (Ddah2), mRNA.         |
| scI0214063.1  | 118-S | 58.5996 | 6.04    | 4732437J24Rik | NM_172338.1   | Mus musculus RIKEN cDNA 4732437J24 gene (4732437J24Rik), mRNA.                                    |                                                                               |
| scI41231.2    | 247-S | 58.4485 | 3.31    | 1300007F04Rik | NM_026185.1   | Mus musculus RIKEN cDNA 1300007F04 gene (1300007F04Rik), mRNA.                                    |                                                                               |
| scI020655.4   | 35-S  | 58.3569 | 1.49    | Sod1          | NM_011434.1   | Mus musculus superoxide dismutase 1, soluble (Sod1), mRNA.                                        |                                                                               |
| scI52209.6    | 1     | 16-S    | 58.3477 | 2.6           | Ttr           | NM_013697.1                                                                                       | Mus musculus transthyretin (Ttr), mRNA.                                       |
| scI000090.1   | 16-S  | 58.3248 | 3.86    | Tcf4          | NM_011550.2   | Mus musculus transcription factor-like 4 (Tcf4), mRNA.                                            |                                                                               |
| scI29242.30   | 1     | 27-S    | 58.2945 | 10.11         | Cadps2        | NM_153163.2                                                                                       | Mus musculus Ca2+-dependent activator protein for secretion 2 (Cadps2), mRNA. |
| scI070510.9   | 205-S | 58.2798 | 1.56    | 5730408C10Rik | NM_027445.1   |                                                                                                   |                                                                               |
| scI26445.6    | 1     | 1-S     | 58.2098 | 3.15          | Igfbp7        | NM_008048.1                                                                                       | Mus musculus insulin-like growth factor binding protein 7 (Igfbp7), mRNA.     |
| scI0069654.1  | 290-S | 58.0753 | 1.42    | Dctn2         | NM_027151.1   | Mus musculus dynactin 2 (Dctn2), mRNA.                                                            |                                                                               |
| scI056367.1   | 256-S | 58.0678 | 4.45    | Scoc          | XM_134455.1   | Mus musculus short coiled-coil protein (Scoc), mRNA.                                              |                                                                               |
| scI38496.5    | 152-S | 58.0424 | 3.36    | Dusp6         | NM_026268.1   | Mus musculus dual specificity phosphatase 6 (Dusp6), mRNA.                                        |                                                                               |

|                     |         |       |               |             |                                                                                                                          |
|---------------------|---------|-------|---------------|-------------|--------------------------------------------------------------------------------------------------------------------------|
| scl37947.10 418-S   | 58.0088 | 2.02  | Tde2          | NM_019760   | Mus musculus tumor differentially expressed 2 (Tde2), mRNA.                                                              |
| scl083921.9 127-S   | 57.9796 | 11.83 | Tmem2         | NM_031997.2 | Mus musculus transmembrane protein 2 (Tmem2), mRNA.                                                                      |
| scl0027999.2 249-S  | 57.9621 | 1.65  | D6Wsu176e     | NM_138587.3 | Mus musculus DNA segment, Chr 6, Wayne State University 176, expressed (D6Wsu176e), mRNA.                                |
| scl0001372.1 16-S   | 57.757  | 3.12  | Clk4          | NM_007714.2 | Mus musculus CDC like kinase 4 (Clk4), mRNA.                                                                             |
| scl018245.5 1-S     | 57.5971 | 1.67  | Oaz1          | NM_008753   | Mus musculus ornithine decarboxylase antizyme (Oaz1), mRNA.                                                              |
| scl0012499.2 107-S  | 57.4802 | 1.61  | Entpd5        | NM_007647.1 | Mus musculus ectonucleoside triphosphate diphosphohydrolase 5 (Entpd5), mRNA.                                            |
| scl44728.4.1 7-S    | 57.436  | 6.72  | 2400003B06Rik | NM_026211.1 | Mus musculus RIKEN cDNA 2400003B06 gene (2400003B06Rik), mRNA.                                                           |
| scl020068.3 1-S     | 57.2101 | 1.47  | Rps17         | NM_009092.2 | Mus musculus ribosomal protein S17 (Rps17), mRNA.                                                                        |
| scl51823.8.1 71-S   | 57.1557 | 13.61 | Tnfsf5ip1     | NM_134138.1 | Mus musculus tumor necrosis factor superfamily, member 5-induced protein 1 (Tnfsf5ip1), mRNA.                            |
| scl26866.19 111-S   | 57.0733 | 3.51  | Phf12         | NM_172992.2 | Mus musculus putative homeodomain transcription factor 2 (Phf12), mRNA.                                                  |
| scl27087.3.5 17-S   | 57.0318 | 1.57  | Azgp1         | NM_013478.1 | Mus musculus alpha-2-glycoprotein 1, zinc (Azgp1), mRNA.                                                                 |
| scl51245.13.1 81-S  | 57.0016 | 11.8  | Ccdc5         | NM_146089.1 | Mus musculus coiled-coil domain containing 5 (Ccdc5), mRNA.                                                              |
| scl0002327.1 0-S    | 56.987  | 10.5  | Mgea6         | NM_146034.1 | Mus musculus meningioma expressed antigen 6 (coiled-coil proline-rich) (Mgea6), mRNA.                                    |
| scl31978.3.3 6-S    | 56.9121 | 10.97 | 5730458D16Rik | NM_177609   | Mus musculus RIKEN cDNA 5730458D16 gene (5730458D16Rik), mRNA.                                                           |
| scl36548.17 86-S    | 56.8262 | 1.49  | Ryk           | NM_013649.2 | Mus musculus receptor-like tyrosine kinase (Ryk), mRNA.                                                                  |
| scl39079.4 283-S    | 56.8047 | 4.37  | Ctgf          | NM_010217   | Mus musculus connective tissue growth factor (Ctgf), mRNA.                                                               |
| scl067180.1 177-S   | 56.7892 | 13.84 | 261031119Rik  | NM_023311.2 | Mus musculus RIKEN cDNA 261031119 gene (261031119Rik), mRNA.                                                             |
| scl37580.8 154-S    | 56.7862 | 1.41  | Nudt4         | NM_027722.2 | Mus musculus nudix (nucleoside diphosphate linked moiety X)-type motif 4 (Nudt4), mRNA.                                  |
| scl019951.1 25-S    | 56.7108 | 2.19  | Rpl32         | NM_172086   | Mus musculus ribosomal protein L32 (Rpl32), mRNA.                                                                        |
| scl00232087.1 95-S  | 56.6408 | 4.15  | Mat2a         | NM_145569   | Mus musculus methionine adenosyltransferase II, alpha (Mat2a), mRNA.                                                     |
| scl05053.16.1 7-S   | 56.5631 | 4.02  | Spq4          | NM_016962   | Mus musculus spastic paraplegia 4 homolog (human) (Spq4), mRNA.                                                          |
| scl22658.17.1 65-S  | 56.5476 | 3.3   | Sec24d        | NM_027135.2 | Mus musculus SEC24 related gene family, member D (S. cerevisiae) (Sec24d), mRNA.                                         |
| scl33261.5 41-S     | 56.5257 | 1.61  | Hsbp1         | NM_024219.1 | Mus musculus heat shock factor binding protein 1 (Hsbp1), mRNA.                                                          |
| scl0013548.2 260-S  | 56.4909 | 8.76  | Dyrk1a        | NM_007890.1 | Mus musculus dual-specificity tyrosine-(Y)-phosphorylation regulated kinase 1a (Dyrk1a), mRNA.                           |
| scl0012301.2 7-S    | 56.4848 | 28.12 | Cacybp        | NM_009786.1 | Mus musculus calyculin binding protein (Cacybp), mRNA.                                                                   |
| scl43180.27.1 0-S   | 56.4784 | 1.39  | Mgea6         | NM_146034.1 | Mus musculus meningioma expressed antigen 6 (coiled-coil proline-rich) (Mgea6), mRNA.                                    |
| scl29903.3 37-S     | 56.47   | 1.98  | AA792894      | NM_145568.2 | Mus musculus EST AA792894 (AA792894), mRNA.                                                                              |
| scl0003902.1 2-S    | 56.4406 | 3.85  | Snx3          | NM_017472.2 | Mus musculus sorting nexin 3 (Snx3), mRNA.                                                                               |
| scl36686.18.1 100-S | 56.4227 | 36.86 | Gclc          | NM_010295.1 | Mus musculus glutamate-cysteine ligase, catalytic subunit (Gclc), mRNA.                                                  |
| scl022629.4 2-S     | 56.4081 | 9.71  | Ywhah         | NM_011738   | Mus musculus tyrosine 3-monooxygenase/tryptophan 5-monooxygenase activation protein, eta polypeptide (Ywhah), mRNA.      |
| scl38510.3.1 11-S   | 56.3316 | 12.13 | Lum           | NM_008524   | Mus musculus lumican (Lum), mRNA.                                                                                        |
| scl40399.3 141-S    | 56.2791 | 12.36 | 2510006C20Rik | NM_026527.1 | Mus musculus RIKEN cDNA 2510006C20 gene (2510006C20Rik), mRNA.                                                           |
| scl017835.20 21-S   | 56.2043 | 1.86  | Mug-ps1       |             |                                                                                                                          |
| scl0011737.2 249-S  | 56.0654 | 1.59  | Anp32a        | NM_009672.2 | Mus musculus acidic (leucine-rich) nuclear phosphoprotein 32 family, member A (Anp32a), mRNA.                            |
| scl0056298.2 141-S  | 56.0215 | 2.32  | Arl6ip2       | NM_019717.1 | Mus musculus ADP-ribosylation factor-like 6 interacting protein 2 (Arl6ip2), mRNA.                                       |
| scl0114128.8 210-S  | 56.0073 | 18.92 | Laptm4b       | NM_033521.2 | Mus musculus lysosomal-associated protein transmembrane 4B (Laptm4b), mRNA.                                              |
| scl000987.1 58-S    | 56      | 11.72 | Ifi203        | NM_008328.1 | Mus musculus interferon activated gene 203 (Ifi203), mRNA.                                                               |
| scl46489.21.1 17-S  | 55.924  | 2.6   | Capn7         | NM_009796.1 | Mus musculus calpain 7 (Capn7), mRNA.                                                                                    |
| scl0003048.1 4-S    | 55.8624 | 5.81  | Abi1          | NM_009594.1 | Mus musculus v-abl Abelson murine leukemia oncogene 1 (Abi1), mRNA.                                                      |
| scl40985.2.1 86-S   | 55.8437 | 2.63  | Hoxb4         | NM_010459   | Mus musculus homeo box B4 (Hoxb4), mRNA.                                                                                 |
| scl25550.21.1 18-S  | 55.8244 | 2.63  | Aco1          | NM_007386.1 | Mus musculus aconitase 1 (Aco1), mRNA.                                                                                   |
| scl37827.3 399-S    | 55.7602 | 1.64  | D10Ert214e    | NM_134007.2 | Mus musculus DNA segment, Chr 10, ERATO Doi 214, expressed (D10Ert214e), mRNA.                                           |
| scl0018569.1 4-S    | 55.732  | 1.51  | Pdcd4         | NM_011050.1 | Mus musculus programmed cell death 4 (Pdcd4), mRNA.                                                                      |
| scl26137.12 266-S   | 55.7247 | 1.49  | 2400003N08Rik | NM_178622.3 | Mus musculus RIKEN cDNA 2400003N08 gene (2400003N08Rik), mRNA.                                                           |
| scl46938.9 3-S      | 55.7052 | 2.12  | Slc25a17      | NM_011399.1 | Mus musculus solute carrier family 25 (mitochondrial carrier; peroxisomal membrane protein), member 17 (Slc25a17), mRNA. |
| scl26063.14.1 2-S   | 55.6617 | 1.38  | Hpd           | NM_008277.1 | Mus musculus 4-hydroxyphenylpyruvic acid dioxygenase (Hpd), mRNA.                                                        |
| scl022129.32 83-S   | 55.625  | 7.28  | Ttc3          | NM_009441.1 | Mus musculus tetrapeptide repeat domain 3 (Ttc3), mRNA.                                                                  |
| scl0001718.1 14-S   | 55.6168 | 1.99  | Mylc2b        | NM_023402.1 |                                                                                                                          |
| scl070652.1 1-S     | 55.5236 | 10.78 | 5730537D05Rik | NM_027495.2 | Mus musculus RIKEN cDNA 5730537D05 gene (5730537D05Rik), mRNA.                                                           |
| scl0066291.2 269-S  | 55.4696 | 1.84  | 1810030N24Rik | NM_025471.1 | Mus musculus RIKEN cDNA 1810030N24 gene (1810030N24Rik), mRNA.                                                           |
| scl011816.1 11-S    | 55.2936 | 1.55  | Apoe          | NM_009696.2 | Mus musculus apolipoprotein E (Apoe), mRNA.                                                                              |
| scl22415.7 11-S     | 55.2659 | 1.45  | Pxmp3         | NM_008994.2 | Mus musculus peroxisomal membrane protein 3 (Pxmp3), mRNA.                                                               |
| scl0066365.1 89-S   | 55.166  | 1.81  | 2310015N07Rik | NM_025515.1 | Mus musculus RIKEN cDNA 2310015N07 gene (2310015N07Rik), mRNA.                                                           |
| scl0018537.2 170-S  | 55.1572 | 4.53  | Pcmt1         | NM_008786.1 | Mus musculus protein-L-isoaspartate (D-aspartate) O-methyltransferase 1 (Pcmt1), mRNA.                                   |
| scl21064.31 2-S     | 55.1566 | 1.6   | 5830434P21Rik | NM_172661.2 | Mus musculus RIKEN cDNA 5830434P21 gene (5830434P21Rik), mRNA.                                                           |
| scl0110796.1 34-S   | 55.1546 | 1.52  | Sdccag33      | XM_029060.3 | Mus musculus serologically defined colon cancer antigen 33 (Sdccag33), mRNA.                                             |

|                 |       |         |       |               |             |                                                                                                                    |
|-----------------|-------|---------|-------|---------------|-------------|--------------------------------------------------------------------------------------------------------------------|
| scl011544.1     | 20-S  | 55.1358 | 1.59  | Adprh         | NM_007414.2 | Mus musculus ADP-ribosylarginine hydrolase (Adprh), mRNA.                                                          |
| scl0067732.1    | 253-S | 55.0406 | 21.18 | 4833421E05Rik | NM_026347.2 | Mus musculus RIKEN cDNA 4833421E05 gene (4833421E05Rik), mRNA.                                                     |
| scl16789.34     | 226-S | 54.9855 | 2.35  | Myo1b         | NM_010863.1 | Mus musculus myosin IB (Myo1b), mRNA.                                                                              |
| scl0027364.1    | 305-S | 54.937  | 1.64  | Srr           | NM_013761.2 | Mus musculus serine racemase (Srr), mRNA.                                                                          |
| scl0100732.7    | 1-S   | 54.93   | 7.06  | Mapre3        | NM_133350.1 | Mus musculus microtubule-associated protein, RP/EB family, member 3 (Mapre3), mRNA.                                |
| scl0053872.2    | 123-S | 54.9208 | 2.32  | Gpiap1        | NM_016739.2 | Mus musculus GPI-anchored membrane protein 1 (Gpiap1), mRNA.                                                       |
| scl0054725.2    | 225-S | 54.9055 | 2.91  | Igsf4a        | NM_018770.2 | Mus musculus immunoglobulin superfamily, member 4A (Igsf4a), transcript variant 3, mRNA.                           |
| scl54119.26.1   | 18-S  | 54.8979 | 2.33  | F8            | NM_007977.1 | Mus musculus coagulation factor VIII (F8), mRNA.                                                                   |
| scl0070599.2    | 259-S | 54.8975 | 4.34  | Ssfa2         | NM_080558.3 | Mus musculus sperm specific antigen 2 (Ssfa2), mRNA.                                                               |
| scl54907.8      | 703-S | 54.815  | 1.51  | F9            | XM_135893.2 | Mus musculus coagulation factor IX (F9), mRNA.                                                                     |
| scl016865.11    | 15-S  | 54.7917 | 2.68  | Lgtn          | NM_010709.1 | Mus musculus ligatin (Lgtn), mRNA.                                                                                 |
| scl0020973.1    | 244-S | 54.7345 | 1.67  | Syng2         | NM_009304.1 | Mus musculus synaptogyrin 2 (Syng2), mRNA.                                                                         |
| scl42842.7.1    | 0-S   | 54.6559 | 2.55  | D12Erttd647e  | NM_026790.1 | Mus musculus DNA segment, Chr 12, ERATO Doi 647, expressed (D12Erttd647e), transcript variant 1, mRNA.             |
| scl45278.7.1    | 11-S  | 54.5828 | 13.29 | Dnajd1        | NM_025384.3 | Mus musculus DnaJ (Hsp40) homolog, subfamily D, member 1 (Dnajd1), mRNA.                                           |
| scl19203.9.1    | 0-S   | 54.5758 | 2.88  | Grb14         | NM_016719.1 | Mus musculus growth factor receptor bound protein 14 (Grb14), mRNA.                                                |
| scl0207683.7    | 143-S | 54.5554 | 3.88  | Igsf11        | NM_170599.2 | Mus musculus immunoglobulin superfamily, member 11 (Igsf11), mRNA.                                                 |
| scl50961.11     | 474-S | 54.5519 | 1.68  | Axin          | XM_128515.4 |                                                                                                                    |
| scl36793.6.1    | 16-S  | 54.537  | 1.88  | Ppib          | NM_011149.1 | Mus musculus peptidylprolyl isomerase B (Ppib), mRNA.                                                              |
| scl066656.2     | 23-S  | 54.469  | 1.4   | Eef1d         | NM_023240.1 | Mus musculus eukaryotic translation elongation factor 1 delta (guanine nucleotide exchange protein) (Eef1d), mRNA. |
| scl20687.14.1   | 105-S | 54.4148 | 1.76  | Slc43a3       | NM_021398.1 | Mus musculus solute carrier family 43, member 3 (Slc43a3), mRNA.                                                   |
| scl014980.6     | 15-S  | 54.3829 | 1.74  | H2-L          |             |                                                                                                                    |
| scl0229473.1    | 11-S  | 54.2133 | 26.84 | D930015E06Rik | NM_172681.2 | Mus musculus RIKEN cDNA D930015E06 gene (D930015E06Rik), mRNA.                                                     |
| scl0394435.1    | 1-S   | 54.208  | 2.47  | Ugt1a9        | NM_201410   |                                                                                                                    |
| scl066840.1     | 106-S | 54.1883 | 10.31 | 0610008N23Rik | NM_025793.1 |                                                                                                                    |
| scl013885.9     | 29-S  | 54.1641 | 1.48  | Esd           | NM_016903   |                                                                                                                    |
| scl53212.12.1   | 83-S  | 54.1324 | 2.71  | 1810073H04Rik | XM_129159.3 |                                                                                                                    |
| scl0246257.1    | 125-S | 54.0995 | 2.09  | Ovca2         | NM_027136.2 | Mus musculus candidate tumor suppressor OVCA2 (Ovca2), mRNA.                                                       |
| scl25565.5.123  | 2-S   | 54.0608 | 5.68  | 2700059D21Rik | XM_358352.1 |                                                                                                                    |
| scl0002429.1    | 121-S | 54.0387 | 2.61  | D15Erttd785e  | NM_025795.2 | Mus musculus DNA segment, Chr 15, ERATO Doi 785, expressed (D15Erttd785e), mRNA.                                   |
| scl0002052.1    | 0-S   | 53.9981 | 1.78  | Cryz          | NM_009968.1 | Mus musculus crystallin, zeta (Cryz), mRNA.                                                                        |
| scl19517.6      | 242-S | 53.9811 | 1.48  | Surf4         | NM_011512.2 | Mus musculus surfait gene 4 (Surf4), mRNA.                                                                         |
| scl38585.9.1    | 9-S   | 53.9603 | 2.36  | 2900091E11Rik | NM_026070.1 | Mus musculus RIKEN cDNA 2900091E11 gene (2900091E11Rik), mRNA.                                                     |
| scl072692.1     | 23-S  | 53.9337 | 3.89  | 2810036L13Rik | NM_144802.2 | Mus musculus RIKEN cDNA 2810036L13 gene (2810036L13Rik), mRNA.                                                     |
| scl0075423.2    | 59-S  | 53.873  | 2.62  | 2810410P22Rik | NM_182994.1 |                                                                                                                    |
| scl0002097.1    | 75-S  | 53.8213 | 5.29  | Stl7          | NM_153091.2 | Mus musculus suppression of tumorigenicity 7-like (Stl7), mRNA.                                                    |
| scl18838.17     | 213-S | 53.7425 | 8.92  | Mrg1          | NM_010825   | Mus musculus myeloid ecotropic viral integration site-related gene 1 (Mrg1), mRNA.                                 |
| scl0014897.1    | 159-S | 53.7147 | 1.8   | Trip12        | NM_133975.2 |                                                                                                                    |
| scl000057.1     | 28-S  | 53.6815 | 3.86  | Nme7          | NM_138314.1 | Mus musculus non-metastatic cells 7, protein expressed in (Nme7), mRNA.                                            |
| scl028035.1     | 139-S | 53.6371 | 1.51  | Usp39         | NM_138592.1 | Mus musculus ubiquitin specific protease 39 (Usp39), mRNA.                                                         |
| scl011906.16    | 208-S | 53.5375 | 1.7   | Atbf1         | NM_007496.1 | Mus musculus AT motif binding factor 1 (Atbf1), mRNA.                                                              |
| scl012268.2     | 49-S  | 53.5067 | 2.11  | C4            | NM_009780   | Mus musculus complement component 4 (within H-2S) (C4), mRNA.                                                      |
| scl066923.1     | 197-S | 53.485  | 7.26  | 2610016F04Rik | NM_025847.1 | Mus musculus RIKEN cDNA 2610016F04 gene (2610016F04Rik), mRNA.                                                     |
| scl22910.4.1    | 66-S  | 53.4744 | 4.82  | S100a10       | NM_009112.1 | Mus musculus S100 calcium binding protein A10 (calpactin) (S100a10), mRNA.                                         |
| scl056455.3     | 23-S  | 53.4679 | 13.71 | Dncl1         | NM_019682   | Mus musculus dynein, cytoplasmic, light chain 1 (Dncl1), mRNA.                                                     |
| scl29671.63     | 470-S | 53.4412 | 1.97  | Itpr1         | NM_010585.2 | Mus musculus inositol 1,4,5-triphosphate receptor 1 (Itpr1), mRNA.                                                 |
| scl054217.2     | 13-S  | 53.4212 | 4.35  | Rpl36         | NM_018730   | Mus musculus ribosomal protein L36 (Rpl36), mRNA.                                                                  |
| scl0214489.1    | 247-S | 53.4119 | 1.54  | BC003965      | XM_128528.2 | Mus musculus cDNA sequence BC003965 (BC003965), mRNA.                                                              |
| scl23771.9.1    | 58-S  | 53.3428 | 1.37  | Eif3s2        | NM_018799.1 | Mus musculus eukaryotic translation initiation factor 3, subunit 2 (beta) (Eif3s2), mRNA.                          |
| scl43301.1.2269 | 3-S   | 53.3354 | 12.86 | Gdap10        | NM_010268.1 | Mus musculus ganglioside-induced differentiation-associated-protein 10 (Gdap10), mRNA.                             |
| scl066151.5     | 253-S | 53.3261 | 1.67  | 1110020C13Rik | NM_025385.2 | Mus musculus RIKEN cDNA 1110020C13 gene (1110020C13Rik), mRNA.                                                     |
| scl22543.4.4    | 13-S  | 53.2297 | 1.72  | Adh5          | NM_007410.2 | Mus musculus alcohol dehydrogenase 5 (class III), chi polypeptide (Adh5), mRNA.                                    |
| scl43363.13     | 112-S | 53.1924 | 3.55  | Txndc7        | XM_126809.3 |                                                                                                                    |
| scl000275.1     | 39-S  | 53.1737 | 1.58  | 3010033P07Rik | NM_029767.1 | Mus musculus RIKEN cDNA 3010033P07 gene (3010033P07Rik), mRNA.                                                     |
| scl22689.16.1   | 37-S  | 53.1687 | 1.71  | Sdfr2         | NM_009146   | Mus musculus stromal cell derived factor receptor 2 (Sdfr2), mRNA.                                                 |
| scl26467.3.1    | 2-S   | 53.1444 | 2.05  | Chic2         | NM_028850.1 | Mus musculus cysteine-rich hydrophobic domain 2 (Chic2), mRNA.                                                     |
| scl30652.3      | 263-S | 53.1367 | 3.76  | 2410015N17Rik | NM_023203.1 | Mus musculus RIKEN cDNA 2410015N17 gene (2410015N17Rik), mRNA.                                                     |

|                     |         |       |               |             |                                                                                                                        |
|---------------------|---------|-------|---------------|-------------|------------------------------------------------------------------------------------------------------------------------|
| scl068713.2 9-S     | 53.1191 | 1.8   | Ifitm1        | NM_026820   | Mus musculus interferon induced transmembrane protein 1 (Ifitm1), mRNA.                                                |
| scl43223.12.1 25-S  | 53.0979 | 1.57  | Ap4s1         | NM_021710.1 | Mus musculus adaptor-related protein complex AP-4, sigma 1 (Ap4s1), mRNA.                                              |
| scl38291.1 10-S     | 53.0951 | 2.67  | D10Ucla2      | NM_133996.2 | Mus musculus DNA segment, Chr 10, University of California at Los Angeles 2 (D10Ucla2), mRNA.                          |
| scl011722.3 4-S     | 53.0232 | 2.75  | Amy1          | NM_007446.1 | Mus musculus amylase 1, salivary (Amy1), mRNA.                                                                         |
| scl0002638.1 12-S   | 52.857  | 25.7  | Sdhb          | NM_023374.3 | Mus musculus succinate dehydrogenase complex, subunit B, iron sulfur (Ip) (Sdhb), mRNA.                                |
| scl027364.2 20-S    | 52.7124 | 2.45  | Srr           | NM_013761.2 | Mus musculus serine racemase (Srr), mRNA.                                                                              |
| scl019243.1 42-S    | 52.7046 | 9.76  | Ptp4a1        | NM_011200   | Mus musculus protein tyrosine phosphatase 4a1 (Ptp4a1), mRNA.                                                          |
| scl076279.3 16-S    | 52.6931 | 1.73  | Cyp2d26       | NM_029562.1 | Mus musculus cytochrome P450, family 2, subfamily d, polypeptide 26 (Cyp2d26), mRNA.                                   |
| scl0072117.2 260-S  | 52.6867 | 9.26  | Mak3          | XM_148131.1 |                                                                                                                        |
| scl056876.17 315-S  | 52.6534 | 2.37  | Nelf          | NM_020276.2 | Mus musculus nasal embryonic LHRH factor (Nelf), mRNA.                                                                 |
| scl24599.7 209-S    | 52.633  | 2.24  | Sdf4          | NM_011341.3 | Mus musculus stromal cell derived factor 4 (Sdf4), mRNA.                                                               |
| scl21684.2.5 0-S    | 52.5689 | 2.05  | Rbm15         | XM_131139.4 |                                                                                                                        |
| scl0069740.2 2-S    | 52.5007 | 3.8   | Z410012M04Rik | NM_027193.2 | Mus musculus RIKEN cDNA 2410012M04 gene (Z410012M04Rik), mRNA.                                                         |
| scl0001353.1 10-S   | 52.4558 | 1.75  | H2afv         | XM_126043.3 |                                                                                                                        |
| scl50582.4.1 9-S    | 52.3776 | 1.64  | Cipp          | NM_017393   | Mus musculus caseinolytic protease, ATP-dependent, proteolytic subunit homolog (E. coli) (Cipp), mRNA.                 |
| scl49488.8 241-S    | 52.3285 | 1.89  | Zfp263        | NM_148924.2 | Mus musculus zinc finger protein 263 (Zfp263), mRNA.                                                                   |
| scl0014924.2 213-S  | 52.3259 | 13    | Baiap1        | NM_010367.1 | Mus musculus BAI1-associated protein 1 (Baiap1), mRNA.                                                                 |
| scl0054151.1 287-S  | 52.3179 | 1.59  | Cyhr1         | NM_019396.1 | Mus musculus cysteine and histidine rich 1 (Cyhr1), mRNA.                                                              |
| scl18802.5.1 208-S  | 52.2326 | 1.85  | Ndufaf1       | NM_027175.2 | Mus musculus NADH dehydrogenase (ubiquinone) 1 alpha subcomplex, assembly factor 1 (Ndufaf1), mRNA.                    |
| scl0018173.2 296-S  | 52.0924 | 1.92  | Slc11a1       | NM_013612.1 | Mus musculus solute carrier family 11 (proton-coupled divalent metal ion transporters), member 1 (Slc11a1), mRNA.      |
| scl0075991.1 191-S  | 52.0696 | 1.64  | 5033405K12Rik | NM_153567.1 | Mus musculus RIKEN cDNA 5033405K12 gene (5033405K12Rik), mRNA.                                                         |
| scl078925.3 27-S    | 51.8978 | 3.88  | Srd5a1        | NM_175283.2 | Mus musculus steroid 5 alpha-reductase 1 (Srd5a1), mRNA.                                                               |
| scl015018.6 2-S     | 51.8278 | 2.41  | H2-Q7         | XM_359282.1 | Mus musculus histocompatibility 2, Q region locus 7 (H2-Q7), mRNA.                                                     |
| scl27567.9 262-S    | 51.8124 | 9.41  | Ccng2         | NM_007635.2 | Mus musculus cyclin G2 (Ccng2), mRNA.                                                                                  |
| scl0076933.2 252-S  | 51.7347 | 4.69  | Z310061N23Rik | NM_029803.1 | Mus musculus RIKEN cDNA 2310061N23 gene (Z310061N23Rik), mRNA.                                                         |
| scl027045.1 0-S     | 51.6766 | 14.07 | Nit1          | NM_012049.1 | Mus musculus nitriase 1 (Nit1), mRNA.                                                                                  |
| scl019777.1 32-S    | 51.6602 | 1.92  | C80913        | NM_011274.2 | Mus musculus expressed sequence C80913 (C80913), mRNA.                                                                 |
| scl49651.7 46-S     | 51.6528 | 3.25  | Tgif          | NM_009372.2 | Mus musculus TG interacting factor (Tgif), mRNA.                                                                       |
| scl33330.12 227-S   | 51.5688 | 12.54 | Tat           | NM_146214.1 | Mus musculus tyrosine aminotransferase (Tat), mRNA.                                                                    |
| scl022121.1 118-S   | 51.5197 | 1.7   | Rpl13a        | NM_009438   | Mus musculus ribosomal protein L13a (Rpl13a), mRNA.                                                                    |
| scl011951.2 99-S    | 51.5057 | 1.66  | Atp5g1        | NM_007506.2 | Mus musculus ATP synthase, H+ transporting, mitochondrial F0 complex, subunit c (subunit 9), isoform 1 (Atp5g1), mRNA. |
| scl26598.18 80-S    | 51.4711 | 1.83  | Gpr125        | XM_132089.2 |                                                                                                                        |
| scl0003542.1 12-S   | 51.4677 | 2.11  | Sfmb          | NM_024233.2 | Mus musculus small fragment nuclease (Sfmb), mRNA.                                                                     |
| scl0077721.2 286-S  | 51.4204 | 1.44  | Mrps5         | NM_029963.2 | Mus musculus mitochondrial ribosomal protein S5 (Mrps5), mRNA.                                                         |
| scl015953.2 220-S   | 51.4049 | 4     | Ifi47         | NM_008330.1 | Mus musculus interferon gamma inducible protein (Ifi47), mRNA.                                                         |
| scl37831.9 401-S    | 51.3954 | 10.53 | Tfam          | NM_009360.2 | Mus musculus transcription factor A, mitochondrial (Tfam), mRNA.                                                       |
| scl26190.16 67-S    | 51.347  | 1.75  | Coro1c        | NM_011779.2 | Mus musculus coronin, actin binding protein 1C (Coro1c), mRNA.                                                         |
| scl0067238.2 233-S  | 51.2428 | 3.71  | Z810453I06Rik | NM_026050.1 | Mus musculus RIKEN cDNA 2810453I06 gene (Z810453I06Rik), mRNA.                                                         |
| scl47523.9 497-S    | 51.2088 | 1.36  | Gpd1          | NM_010271.2 | Mus musculus glycerol-3-phosphate dehydrogenase 1 (soluble) (Gpd1), mRNA.                                              |
| scl25240.12 194-S   | 51.1791 | 1.36  | Pgm2          | NM_028132   | Mus musculus phosphoglucomutase 2 (Pgm2), mRNA.                                                                        |
| scl52206.9 527-S    | 51.1604 | 4.38  | Rnf138        | NM_019706.2 | Mus musculus ring finger protein 138 (Rnf138), transcript variant 2, mRNA.                                             |
| scl066845.4 127-S   | 51.0131 | 1.4   | Mrpl33        | NM_025796.1 | Mus musculus mitochondrial ribosomal protein L33 (Mrpl33), mRNA.                                                       |
| scl013118.12 302-S  | 50.6621 | 47.31 | Cyp4a12       | NM_172306.1 | Mus musculus cytochrome P450, family 4, subfamily a, polypeptide 12 (Cyp4a12), mRNA.                                   |
| scl000657.1 20-S    | 50.6002 | 2.09  | Mrps31        | NM_020560.1 | Mus musculus mitochondrial ribosomal protein S31 (Mrps31), mRNA.                                                       |
| scl00243771.2 198-S | 50.5868 | 2.3   | Zc3hdc1       | NM_172893.1 | Mus musculus zinc finger CCCH type domain containing 1 (Zc3hdc1), mRNA.                                                |
| scl076281.4 19-S    | 50.514  | 1.72  | Tax1bp3       | NM_029564   |                                                                                                                        |
| scl0020923.1 202-S  | 50.4462 | 1.43  | Supt4h2       | NM_011509   | Mus musculus suppressor of Ty 4 homolog 2 (S. cerevisiae) (Supt4h2), mRNA.                                             |
| scl44563.12 95-S    | 50.3945 | 9.78  | Z810446P07Rik | NM_175187.3 | Mus musculus RIKEN cDNA 2810446P07 gene (Z810446P07Rik), mRNA.                                                         |
| scl0004044.1 9-S    | 50.3291 | 9.66  | Ppp1cb        | NM_172707.1 | Mus musculus protein phosphatase 1, catalytic subunit, beta isoform (Ppp1cb), mRNA.                                    |
| scl066154.6 169-S   | 50.3264 | 1.39  | Tmem14c       | NM_025387.1 |                                                                                                                        |
| scl0014105.1 218-S  | 50.2129 | 2.54  | Fusip1        | NM_010178.1 | Mus musculus FUS interacting protein (serine-arginine rich) 1 (Fusip1), mRNA.                                          |
| scl0002273.1 3-S    | 50.1294 | 8.95  | Actr10        | NM_019785.1 | Mus musculus ARP10 actin-related protein 10 homolog (S. cerevisiae) (Actr10), mRNA.                                    |
| scl064656.5 1-S     | 50.079  | 1.99  | Mrps23        | NM_024174.4 | Mus musculus mitochondrial ribosomal protein S23 (Mrps23), mRNA.                                                       |
| scl0016419.2 269-S  | 50.0207 | 2.97  | Irgb5         | NM_010580.1 | Mus musculus integrin beta 5 (Irgb5), mRNA.                                                                            |
| scl52593.10.1 23-S  | 50.0152 | 3.98  | 5033414D02Rik | NM_026362.1 | Mus musculus RIKEN cDNA 5033414D02 gene (5033414D02Rik), mRNA.                                                         |
| scl0002033.1 5-S    | 49.8708 | 1.71  | 1110013G13Rik | NM_146141.1 | Mus musculus RIKEN cDNA 1110013G13 gene (1110013G13Rik), mRNA.                                                         |

|                     |         |       |               |             |                                                                                                                               |
|---------------------|---------|-------|---------------|-------------|-------------------------------------------------------------------------------------------------------------------------------|
| scI068082.4 12-S    | 49.8623 | 2.66  | Dusp19        | NM_024438.2 | Mus musculus dual specificity phosphatase 19 (Dusp19), mRNA.                                                                  |
| scI0001961.1 16-S   | 49.7683 | 1.75  | Acadm         | NM_007382   | Mus musculus acetyl-Coenzyme A dehydrogenase, medium chain (Acadm), mRNA.                                                     |
| scI00223664.2 280-S | 49.7136 | 8.58  | E130306I01Rik | NM_145471.1 | Mus musculus RIKEN cDNA E130306I01 gene (E130306I01Rik), mRNA.                                                                |
| scI39911.9 64-S     | 49.6921 | 2.42  | Gosr1         | NM_016810.2 | Mus musculus golgi SNAP receptor complex member 1 (Gosr1), mRNA.                                                              |
| scI021885.1 30-S    | 49.6449 | 1.57  | Tle1          | NM_011599.2 | Mus musculus transducin-like enhancer of split 1, homolog of Drosophila E(spl) (Tle1), mRNA.                                  |
| scI0109135.16 234-S | 49.64   | 14.11 | Plekha5       | NM_144920.2 |                                                                                                                               |
| scI022186.3 30-S    | 49.4544 | 1.93  | Uba52         | NM_019883   | Mus musculus ubiquitin A-52 residue ribosomal protein fusion product 1 (Uba52), mRNA.                                         |
| scI0000117.1 15-S   | 49.4446 | 4     | Taf6          | NM_009315.1 | Mus musculus adaptor-related protein complex AP-4, mu 1 (Ap4m1), mRNA.                                                        |
| scI33434.12 331-S   | 49.3991 | 48.72 | 9130231C15Rik | NM_133960.2 | Mus musculus RIKEN cDNA 9130231C15 gene (9130231C15Rik), mRNA.                                                                |
| scI24615.5.1 59-S   | 49.295  | 1.44  | 1500011L16Rik | NM_026899.1 | Mus musculus RIKEN cDNA 1500011L16 gene (1500011L16Rik), mRNA.                                                                |
| scI0073834.1 147-S  | 49.2474 | 5.95  | Atp6v1d       | NM_023721.1 | Mus musculus ATPase, H+ transporting, V1 subunit D (Atp6v1d), mRNA.                                                           |
| scI38446.16 40-S    | 49.1557 | 11.72 | Nap1l1        | NM_015781.2 | Mus musculus nucleosome assembly protein 1-like 1 (Nap1l1), mRNA.                                                             |
| scI020916.11 281-S  | 49.0959 | 13.06 | Sucla2        | XM_127733.2 | Mus musculus succinate-Coenzyme A ligase, ADP-forming, beta subunit (Sucla2), mRNA.                                           |
| scI21857.5.1 13-S   | 49.0773 | 1.35  | Psmb4         | NM_008945.1 | Mus musculus proteasome (prosome, macropain) subunit, beta type 4 (Psmb4), mRNA.                                              |
| scI059038.1 0-S     | 49.0663 | 2.15  | Pxmp4         | NM_021534.2 | Mus musculus peroxisomal membrane protein 4 (Pxmp4), mRNA.                                                                    |
| scI000050.1 4-S     | 49.0642 | 13.86 | Gpr124        | NM_054044.1 | Mus musculus G protein-coupled receptor 124 (Gpr124), mRNA.                                                                   |
| scI074104.1 75-S    | 49.0562 | 2.03  | Abcb6         | NM_023732.2 | Mus musculus ATP-binding cassette, sub-family B (MDR/TAP), member 6 (Abcb6), mRNA.                                            |
| scI0078757.1 96-S   | 49.0505 | 1.87  | 4921505C17Rik | NM_030168.2 | Mus musculus RIKEN cDNA 4921505C17 gene (4921505C17Rik), mRNA.                                                                |
| scI44140.2 304-S    | 48.9583 | 10.87 | Uqcrfs1       | NM_025710.1 | Mus musculus ubiquinol-cytochrome c reductase, Rieske iron-sulfur polypeptide 1 (Uqcrfs1), mRNA.                              |
| scI0068198.2 271-S  | 48.9192 | 43.14 | Ndufb2        | NM_026612.1 | Mus musculus NADH dehydrogenase (ubiquinone) 1 beta subcomplex, 2 (Ndufb2), mRNA.                                             |
| scI070478.15 14-S   | 48.9142 | 1.9   | Mipep         | NM_027436.1 | Mus musculus mitochondrial intermediate peptidase (Mipep), mRNA.                                                              |
| scI056278.9 3-S     | 48.8966 | 1.67  | Gkap1         | NM_019832.2 |                                                                                                                               |
| scI18407.1 27-S     | 48.8811 | 11.5  | Matb          | NM_010658.2 | Mus musculus v-maf musculoaponeurotic fibrosarcoma oncogene family, protein B (avian) (Matb), mRNA.                           |
| scI0020461.1 17-S   | 48.8548 | 2.88  | Silg111       |             |                                                                                                                               |
| scI51657.9.1 30-S   | 48.8499 | 1.51  | Abhd3         | NM_134130.1 | Mus musculus abhydrolase domain containing 3 (Abhd3), mRNA.                                                                   |
| scI068077.3 0-S     | 48.8055 | 4.96  | Gltscr2       | NM_133831.1 | Mus musculus glioma tumor suppressor candidate region gene 2 (Gltscr2), mRNA.                                                 |
| scI0013669.1 3-S    | 48.8048 | 1.66  | Eif3s10       | NM_010123.2 | Mus musculus eukaryotic translation initiation factor 3, subunit 10 (theta) (Eif3s10), mRNA.                                  |
| scI019982.5 48-S    | 48.7756 | 1.46  | Rpl36a        | NM_019865.2 | Mus musculus ribosomal protein L36a (Rpl36a), mRNA.                                                                           |
| scI19749.5.1 9-S    | 48.7458 | 2.93  | Meig1         | NM_008579.4 | Mus musculus meiosis expressed gene 1 (Meig1), mRNA.                                                                          |
| scI49542.15 45-S    | 48.6257 | 2.62  | D030028O16Rik | NM_145984.2 | Mus musculus RIKEN cDNA D030028O16 gene (D030028O16Rik), mRNA.                                                                |
| scI014790.2 94-S    | 48.6066 | 1.96  | Grccl0        | NM_013535.1 | Mus musculus gene rich cluster, C10 gene (Grccl0), mRNA.                                                                      |
| scI019166.8 87-S    | 48.6023 | 1.35  | Psm2          | NM_008944.1 | Mus musculus proteasome (prosome, macropain) subunit, alpha type 2 (Psm2), mRNA.                                              |
| scI0229877.2 148-S  | 48.6009 | 1.6   | Rap1gds1      | NM_145544   | Mus musculus RAP1, GTP-GDP dissociation stimulator 1 (Rap1gds1), mRNA.                                                        |
| scI40873.2 406-S    | 48.596  | 5.09  | Arl4          | NM_025404.1 |                                                                                                                               |
| scI058810.1 30-S    | 48.5116 | 2.65  | Akr1a4        | NM_021473.2 | Mus musculus aldo-keto reductase family 1, member A4 (aldehyde reductase) (Akr1a4), mRNA.                                     |
| scI056444.13 2-S    | 48.4248 | 1.56  | Actr10        | NM_019785.1 | Mus musculus ARP10 actin-related protein 10 homolog (S. cerevisiae) (Actr10), mRNA.                                           |
| scI054151.1 72-S    | 48.4015 | 9.92  | Cyhr1         | NM_019396   | Mus musculus cysteine and histidine rich 1 (Cyhr1), mRNA.                                                                     |
| scI54488.12.1 33-S  | 48.3357 | 3.14  | Pir           | XM_136134.3 |                                                                                                                               |
| scI0116905.1 30-S   | 48.331  | 2.3   | Dph2l1        | NM_144491   | Mus musculus diphtheria toxin resistance protein required for diphthamide biosynthesis (Saccharomyces)-like 1 (Dph2l1), mRNA. |
| scI49316.10.1 12-S  | 48.2636 | 1.52  | Dnajb11       | XM_148071.1 | Mus musculus DnaJ (Hsp40) homolog, subfamily B, member 11 (Dnajb11), mRNA.                                                    |
| scI0002469.1 386-S  | 48.2367 | 1.38  | AI313915      | NM_144845.1 | Mus musculus expressed sequence AI313915 (AI313915), mRNA.                                                                    |
| scI46602.21 8-S     | 48.2183 | 6.93  | Nid2          | NM_008695.1 | Mus musculus nidogen 2 (Nid2), mRNA.                                                                                          |
| scI0024135.1 295-S  | 48.2163 | 2.47  | Zfp68         | NM_013844.1 | Mus musculus zinc finger protein 68 (Zfp68), mRNA.                                                                            |
| scI0012508.2 215-S  | 48.2006 | 13.96 | Cd53          | NM_007651.2 | Mus musculus CD53 antigen (Cd53), mRNA.                                                                                       |
| scI0016597.1 0-S    | 48.1943 | 7.9   | Klf12         | NM_010636.2 | Mus musculus Kruppel-like factor 12 (Klf12), mRNA.                                                                            |
| scI29983.21.1 98-S  | 48.1823 | 5.51  | Abcg2         | NM_011920.1 | Mus musculus ATP-binding cassette, sub-family G (WHITE), member 2 (Abcg2), mRNA.                                              |
| scI52119.18 599-S   | 48.1154 | 5.42  | Jmjd1b        | NM_029518.1 | Mus musculus jumonji domain containing 1B (Jmjd1b), mRNA.                                                                     |
| scI0016396.1 119-S  | 48.0379 | 1.82  | Itch          | XM_192925.3 | Mus musculus itchy (Itch), mRNA.                                                                                              |
| scI42032.3 211-S    | 48.0367 | 8.74  | Bag5          | XM_127149.3 | Mus musculus BCL2-associated athanogene 5 (Bag5), mRNA.                                                                       |
| scI42964.22.1 29-S  | 47.8992 | 3.6   | Ylpm1         | NM_178363.2 |                                                                                                                               |
| scI24707.8.1 1-S    | 47.899  | 3.21  | Mad2l2        | NM_027985.1 | Mus musculus MAD2 mitotic arrest deficient-like 2 (yeast) (Mad2l2), mRNA.                                                     |
| scI0140792.13 120-S | 47.859  | 19.64 | Colecl2       | NM_130449.1 | Mus musculus collectin sub-family member 12 (Colecl2), mRNA.                                                                  |
| scI32097.7.1 17-S   | 47.7906 | 7.54  | 2010110P09Rik | XM_355937.1 |                                                                                                                               |
| scI011787.1 19-S    | 47.7426 | 9.37  | Appb2         | NM_009686.1 | Mus musculus amyloid beta (A4) precursor protein-binding, family B, member 2 (Appb2), mRNA.                                   |
| scI47764.3 554-S    | 47.7422 | 3.39  | Cdc42ep1      | NM_027219.1 | Mus musculus CDC42 effector protein (Rho GTPase binding) 1 (Cdc42ep1), mRNA.                                                  |
| scI00107141.1 179-S | 47.6854 | 2.78  | Cyp2c50       | NM_134144.1 | Mus musculus cytochrome P450, family 2, subfamily c, polypeptide 50 (Cyp2c50), mRNA.                                          |

|                 |       |         |       |               |             |                                                                                                                 |
|-----------------|-------|---------|-------|---------------|-------------|-----------------------------------------------------------------------------------------------------------------|
| scl52860.17     | 315-S | 47.6497 | 1.55  | Syvn1         | NM_028769.4 |                                                                                                                 |
| scl0000115.1    | 6-S   | 47.516  | 3.73  | Fip11i        | NM_024183.3 | Mus musculus FIP1 like 1 ( <i>S. cerevisiae</i> ) (Fip11i), mRNA.                                               |
| scl0066704.2    | 280-S | 47.4768 | 1.98  | 4921506I22Rik | NM_025717.2 | Mus musculus RIKEN cDNA 4921506I22 gene (4921506I22Rik), mRNA.                                                  |
| scl0108755.3    | 138-S | 47.4692 | 12.7  | 2610208E05Rik | NM_175364.2 | Mus musculus RIKEN cDNA 2610208E05 gene (2610208E05Rik), mRNA.                                                  |
| scl0015926.2    | 189-S | 47.4655 | 1.45  | ldh1          | NM_010497.1 | Mus musculus isocitrate dehydrogenase 1 (NADP+), soluble (ldh1), mRNA.                                          |
| scl46304.5.1    | 86-S  | 47.2005 | 4.19  | Mrpl52        | NM_026851.1 | Mus musculus mitochondrial ribosomal protein L52 (Mrpl52), mRNA.                                                |
| scl0382053.6    | 30-S  | 47.1985 | 3.12  | Es31          | XM_356125.1 |                                                                                                                 |
| scl000056.1     | 228-S | 47.0959 | 7.99  | C76566        | NM_178879.2 |                                                                                                                 |
| scl066292.2     | 43-S  | 47.0423 | 1.59  | Mrps21        | NM_078479.2 | Mus musculus mitochondrial ribosomal protein S21 (Mrps21), mRNA.                                                |
| scl013101.1     | 72-S  | 46.9911 | 1.89  | Cyp2d10       | NM_010005.2 | Mus musculus cytochrome P450, family 2, subfamily d, polypeptide 10 (Cyp2d10), mRNA.                            |
| scl51160.13.1   | 27-S  | 46.9183 | 1.79  | Tfb1m         | NM_146074.1 | Mus musculus transcription factor B1, mitochondrial (Tfb1m), mRNA.                                              |
| scl33480.16     | 131-S | 46.8458 | 10.9  | 4930470D19Rik | NM_026274.2 | Mus musculus RIKEN cDNA 4930470D19 gene (4930470D19Rik), mRNA.                                                  |
| scl021858.1     | 100-S | 46.7462 | 1.84  | Timp2         | NM_011594.2 | Mus musculus tissue inhibitor of metalloproteinase 2 (Timp2), mRNA.                                             |
| scl42329.4      | 2-S   | 46.7223 | 2.09  | Zfp50         | XM_127016.2 | Mus musculus zinc finger protein 50 (Zfp50), mRNA.                                                              |
| scl0001033.1    | 52-S  | 46.6926 | 5.23  | Sico1b2       | NM_020495.1 | Mus musculus solute carrier organic anion transporter family, member 1b2 (Sico1b2), transcript variant 1, mRNA. |
| scl46821.2.2    | 6-S   | 46.5607 | 1.56  | 2700088M22Rik | NM_026025   | Mus musculus RIKEN cDNA 2700088M22 gene (2700088M22Rik), mRNA.                                                  |
| scl25806.10.1   | 16-S  | 46.5313 | 1.72  | Zdhhc4        | NM_028379.1 | Mus musculus zinc finger, DHHC domain containing 4 (Zdhhc4), mRNA.                                              |
| scl00319800.1   | 48-S  | 46.5249 | 3.75  | C730048C13Rik | NM_177002.2 | Mus musculus RIKEN cDNA C730048C13 gene (C730048C13Rik), mRNA.                                                  |
| scl0004155.1    | 21-S  | 46.4471 | 9.58  | Hip2          | NM_016786.2 | Mus musculus huntingtin interacting protein 2 (Hip2), mRNA.                                                     |
| scl0110829.10   | 232-S | 46.4234 | 10.69 | Lims1         | NM_026148.1 | Mus musculus LIM and senescent cell antigen-like domains 1 (Lims1), mRNA.                                       |
| scl34081.10.510 | 67-S  | 46.4158 | 1.37  | 0710008K08Rik | NM_026995.1 |                                                                                                                 |
| scl42591.3.1    | 5-S   | 46.2871 | 3.05  | Idb2          | NM_010496.2 | Mus musculus inhibitor of DNA binding 2 (Idb2), mRNA.                                                           |
| scl35530.18     | 2-S   | 46.2446 | 2.77  | Mod1          | NM_008615   | Mus musculus malic enzyme, supernatant (Mod1), mRNA.                                                            |
| scl070380.1     | 33-S  | 46.2295 | 6.06  | Mospd1        | NM_027409   | Mus musculus motile sperm domain containing 1 (Mospd1), mRNA.                                                   |
| scl0023821.2    | 49-S  | 46.2001 | 2.01  | Bace1         | NM_011792.3 | Mus musculus beta-site APP cleaving enzyme 1 (Bace1), mRNA.                                                     |
| scl0213673.3    | 37-S  | 46.1844 | 1.39  | 9530068E07Rik | XM_203329.2 | Mus musculus RIKEN cDNA 9530068E07 gene (9530068E07Rik), mRNA.                                                  |
| scl00227399.2   | 17-S  | 46.1279 | 9.62  | AW555814      | NM_173760.3 | Mus musculus expressed sequence AW555814 (AW555814), mRNA.                                                      |
| scl012274.15    | 0-S   | 45.9552 | 3.33  | C6            | NM_016704.1 | Mus musculus complement component 6 (C6), mRNA.                                                                 |
| scl38536.23.1   | 129-S | 45.9173 | 3.12  | Fgd6          | NM_053072   | Mus musculus FYVE, RhoGEF and PH domain containing 6 (Fgd6), mRNA.                                              |
| scl49981.15.1   | 56-S  | 45.9035 | 1.55  | Gtf2h4        | NM_010364.1 | Mus musculus general transcription factor II H, polypeptide 4 (Gtf2h4), mRNA.                                   |
| scl0170719.14   | 114-S | 45.9008 | 1.83  | Oxr1          | NM_130885.1 | Mus musculus oxidation resistance 1 (Oxr1), mRNA.                                                               |
| scl38453.7.1    | 27-S  | 45.8963 | 1.66  | Csrp2         | NM_007792.2 | Mus musculus cysteine and glycine-rich protein 2 (Csrp2), mRNA.                                                 |
| scl0071911.2    | 148-S | 45.8757 | 1.94  | Bdh           | NM_175177.3 | Mus musculus 3-hydroxybutyrate dehydrogenase (heart, mitochondrial) (Bdh), mRNA.                                |
| scl00116891.1   | 125-S | 45.8675 | 10.57 | BC005682      | NM_033562.2 | Mus musculus cDNA sequence BC005682 (BC005682), mRNA.                                                           |
| scl029869.1     | 26-S  | 45.8459 | 1.91  | Ulk2          | NM_013881.3 | Mus musculus Unc-51 like kinase 2 ( <i>C. elegans</i> ) (Ulk2), mRNA.                                           |
| scl37787.43     | 431-S | 45.8112 | 1.42  | Col18a1       | NM_009929.2 | Mus musculus procollagen, type XVIII, alpha 1 (Col18a1), mRNA.                                                  |
| scl45906.4.1    | 41-S  | 45.7936 | 2.65  | Fhit          | NM_010210.1 | Mus musculus fragile histidine triad gene (Fhit), mRNA.                                                         |
| scl068050.2     | 0-S   | 45.788  | 1.76  | 6330407G11Rik | XM_124343.1 | Mus musculus RIKEN cDNA 6330407G11 gene (6330407G11Rik), mRNA.                                                  |
| scl0021873.2    | 51-S  | 45.7845 | 2.12  | Tjp2          | NM_011597.1 | Mus musculus tight junction protein 2 (Tjp2), mRNA.                                                             |
| scl076178.1     | 20-S  | 45.7644 | 8.49  | 6330578E17Rik | NM_198006.1 | Mus musculus RIKEN cDNA 6330578E17 gene (6330578E17Rik), mRNA.                                                  |
| scl0067891.1    | 266-S | 45.689  | 10.19 | Rpl4          | NM_024212.2 | Mus musculus ribosomal protein L4 (Rpl4), mRNA.                                                                 |
| scl015032.1     | 236-S | 45.6807 | 1.69  | H2-T17        | NM_010396   | Mus musculus histocompatibility 2, T region locus 17 (H2-T17), mRNA.                                            |
| scl0002138.1    | 36-S  | 45.6678 | 11.33 | 4833424P18Rik | NM_029017   | Mus musculus RIKEN cDNA 4833424P18 gene (4833424P18Rik), mRNA.                                                  |
| scl52829.1      | 29-S  | 45.6429 | 1.57  | B3gnt6        | NM_175383.1 |                                                                                                                 |
| scl011984.1     | 128-S | 45.6308 | 10.39 | Atp6v0c       | NM_009729.1 | Mus musculus ATPase, H+ transporting, V0 subunit C (Atp6v0c), mRNA.                                             |
| scl022038.3     | 2-S   | 45.6214 | 2.58  | Plscr1        | NM_011636.1 | Mus musculus phospholipid scramblase 1 (Plscr1), mRNA.                                                          |
| scl45165.9.4    | 29-S  | 45.5466 | 2.49  | Dct           | NM_010024   | Mus musculus dopachrome tautomerase (Dct), mRNA.                                                                |
| scl0003463.1    | 14-S  | 45.5039 | 10.92 | Senp6         | NM_146003   | Mus musculus SUMO/sentrin specific protease 6 (Senp6), mRNA.                                                    |
| scl012389.5     | 102-S | 45.482  | 4.53  | Cav1          | NM_007616.2 |                                                                                                                 |
| scl020955.1     | 87-S  | 45.3407 | 10.27 | Syb1          | NM_011515.1 | Mus musculus synaptobrevin like 1 (Syb1), mRNA.                                                                 |
| scl33924.6.9    | 11-S  | 45.3354 | 1.45  | Ppp2cb        | NM_017374.2 | Mus musculus protein phosphatase 2a, catalytic subunit, beta isoform (Ppp2cb), mRNA.                            |
| scl46463.1.8    | 87-S  | 45.2719 | 3.12  | Gdf2          | NM_019506   | Mus musculus growth differentiation factor 2 (Gdf2), mRNA.                                                      |
| scl49743.39.1   | 15-S  | 45.2475 | 1.83  | C3            | NM_009778.1 | Mus musculus complement component 3 (C3), mRNA.                                                                 |
| scl067755.12    | 300-S | 45.2163 | 1.39  | Ddx47         | NM_026360.1 | Mus musculus DEAD (Asp-Glu-Ala-Asp) box polypeptide 47 (Ddx47), mRNA.                                           |
| scl0209645.9    | 0-S   | 45.1909 | 8.8   | E130319B15Rik | NM_178663.2 | Mus musculus RIKEN cDNA E130319B15 gene (E130319B15Rik), mRNA.                                                  |
| scl0012558.1    | 44-S  | 45.1212 | 1.82  | Cdh2          | NM_007664.1 | Mus musculus cadherin 2 (Cdh2), mRNA.                                                                           |

|               |       |         |       |               |              |                                                                                                             |
|---------------|-------|---------|-------|---------------|--------------|-------------------------------------------------------------------------------------------------------------|
| sci066488.1   | 275-S | 45.077  | 11.12 | 2010309E21Rik | XM_357858.1  | Mus musculus RIKEN cDNA 2010309E21 gene (2010309E21Rik), mRNA.                                              |
| sci067865.1   | 323-S | 45.0732 | 4.17  | Rgs10         | NM_026418.1  | Mus musculus regulator of G-protein signalling 10 (Rgs10), mRNA.                                            |
| sci20301.11   | 1-S   | 44.9868 | 2.66  | Slc20a1       | NM_015747.1  | Mus musculus solute carrier family 20, member 1 (Slc20a1), mRNA.                                            |
| sci072429.2   | 21-S  | 44.9723 | 2.34  | 2010203O07Rik | XM_131409.3  | Mus musculus RIKEN cDNA 2010203O07 gene (2010203O07Rik), mRNA.                                              |
| sci0068073.2  | 190-S | 44.8263 | 1.51  | A930016P21Rik | NM_026546.1  | Mus musculus RIKEN cDNA A930016P21 gene (A930016P21Rik), mRNA.                                              |
| sci0056324.2  | 184-S | 44.7078 | 8.87  | Stam2         | NM_019667.2  | Mus musculus signal transducing adaptor molecule (SH3 domain and ITAM motif) 2 (Stam2), mRNA.               |
| sci23237.22   | 584-S | 44.6964 | 3.11  | 3110057O12Rik | NM_026622.1  | Mus musculus RIKEN cDNA 3110057O12 gene (3110057O12Rik), mRNA.                                              |
| sci0014870.1  | 15-S  | 44.6381 | 2.92  | Gstp1         | NM_013541.1  | Mus musculus glutathione S-transferase, pi 1 (Gstp1), mRNA.                                                 |
| sci41582.8.1  | 74-S  | 44.6255 | 1.54  | Sara2         | NM_025535.1  | Mus musculus SAR1a gene homolog 2 (S. cerevisiae) (Sara2), mRNA.                                            |
| sci0330260.1  | 61-S  | 44.6058 | 1.4   | Pon2          | NM_183308.1  | Mus musculus paraoxonase 2 (Pon2), mRNA.                                                                    |
| sci0002901.1  | 9-S   | 44.5919 | 7.74  | Psmid10       | NM_016883.3  | Mus musculus proteasome (prosome, macropain) 26S subunit, non-ATPase, 10 (Psmid10), mRNA.                   |
| sci0071755.2  | 316-S | 44.5657 | 1.49  | 1300018L09Rik | NM_027903.1  |                                                                                                             |
| sci0020567.1  | 162-S | 44.5394 | 1.83  | Slp           | NM_011413    | Mus musculus sex-limited protein (Slp), mRNA.                                                               |
| sci000928.1   | 86-S  | 44.5299 | 2.35  | Hspd1         | NM_010477.2  | Mus musculus heat shock protein 1 (chaperonin) (Hspd1), mRNA.                                               |
| sci39960.2    | 268-S | 44.51   | 1.35  | 0610009E20Rik | NM_025318.1  | Mus musculus RIKEN cDNA 0610009E20 gene (0610009E20Rik), mRNA.                                              |
| sci0014972.1  | 210-S | 44.4694 | 2.66  | H2-K1         | NM_001001892 |                                                                                                             |
| sci0068033.1  | 52-S  | 44.4629 | 1.59  | 2810437L13Rik | NM_197980.1  | Mus musculus RIKEN cDNA 2810437L13 gene (2810437L13Rik), mRNA.                                              |
| sci011988.11  | 16-S  | 44.4513 | 4.08  | Slc7a2        | NM_007514    | Mus musculus solute carrier family 7 (cationic amino acid transporter, y+ system), member 2 (Slc7a2), mRNA. |
| sci52508.10.1 | 140-S | 44.4225 | 1.79  | Cyp2c70       | NM_145499.1  | Mus musculus cytochrome P450, family 2, subfamily c, polypeptide 70 (Cyp2c70), mRNA.                        |
| sci46091.5.1  | 30-S  | 44.4172 | 3.02  | Cpb2          | NM_019775.2  | Mus musculus carboxypeptidase B2 (plasma) (Cpb2), mRNA.                                                     |
| sci0013000.1  | 146-S | 44.4161 | 2.33  | Csnk2a2       | NM_009974.2  | Mus musculus casein kinase II, alpha 2, polypeptide (Csnk2a2), mRNA.                                        |
| sci0223255.1  | 245-S | 44.3547 | 2.06  | Stk24         | NM_145465.1  | Mus musculus serine/threonine kinase 24 (STE20 homolog, yeast) (Stk24), mRNA.                               |
| sci38974.6    | 243-S | 44.3514 | 1.64  | Ostm1         | NM_172416.2  | Mus musculus osteopetrosis associated transmembrane protein 1 (Ostm1), mRNA.                                |
| sci017846.2   | 20-S  | 44.3406 | 1.4   | Commd1        | NM_144514.1  | Mus musculus COMM domain containing 1 (Commd1), mRNA.                                                       |
| sci27972.10.1 | 31-S  | 44.2848 | 1.87  | Khk           | NM_008439.2  | Mus musculus ketohexokinase (Khk), mRNA.                                                                    |
| sci0067398.1  | 126-S | 44.2727 | 1.99  | Spr           | NM_026130.1  | Mus musculus signal recognition particle receptor (docking protein) (Spr), mRNA.                            |
| sci0014263.1  | 71-S  | 44.2467 | 2.34  | Fmo5          | NM_010232.3  | Mus musculus flavin containing monooxygenase 5 (Fmo5), mRNA.                                                |
| sci0003301.1  | 436-S | 44.2425 | 10.07 | Nfs1          | NM_010911.1  | Mus musculus nitrogen fixation gene 1 (S. cerevisiae) (Nfs1), mRNA.                                         |
| sci28136.6    | 235-S | 44.2077 | 1.82  | Cldn12        | NM_022890.1  | Mus musculus claudin 12 (Cldn12), mRNA.                                                                     |
| sci067116.1   | 6-S   | 44.1958 | 1.89  | Cuedc2        | NM_024192.1  | Mus musculus CUE domain containing 2 (Cuedc2), mRNA.                                                        |
| sci24327.50   | 27-S  | 44.1865 | 14.77 | Abca1         | NM_013454.2  | Mus musculus ATP-binding cassette, sub-family A (ABC1), member 1 (Abca1), mRNA.                             |
| sci013244.1   | 23-S  | 44.1561 | 1.55  | Degs          | NM_007853.2  | Mus musculus degenerative spermatocyte homolog (Drosophila) (Degs), mRNA.                                   |
| sci0001789.1  | 298-S | 44.1007 | 4.17  | Il1rap        | NM_134103.1  | Mus musculus interleukin 1 receptor accessory protein (Il1rap), mRNA.                                       |
| sci21410.6.2  | 5-S   | 44.0221 | 2.25  | 2310066N05Rik | NM_027371.1  | Mus musculus RIKEN cDNA 2310066N05 gene (2310066N05Rik), mRNA.                                              |
| sci50575.22.1 | 51-S  | 43.9422 | 3.94  | Emr1          | NM_010130.1  | Mus musculus EGF-like module containing, mucin-like, hormone receptor-like sequence 1 (Emr1), mRNA.         |
| sci066169.3   | 11-S  | 43.9047 | 1.74  | Tomm7         | NM_025394    | Mus musculus translocase of outer mitochondrial membrane 7 homolog (yeast) (Tomm7), mRNA.                   |
| sci20945.14   | 483-S | 43.8573 | 1.82  | Epc2          | NM_172663.2  |                                                                                                             |
| sci000694.1   | 23-S  | 43.8256 | 3.2   | F11           | NM_028066.1  | Mus musculus coagulation factor XI (F11), mRNA.                                                             |
| sci0056330.1  | 0-S   | 43.7273 | 1.77  | Pdcd5         | NM_019746.2  | Mus musculus programmed cell death 5 (Pdcd5), mRNA.                                                         |
| sci46056.12.1 | 60-S  | 43.7231 | 11.1  | Mtrf1         | NM_145960    | Mus musculus mitochondrial translational release factor 1 (Mtrf1), mRNA.                                    |
| sci015519.1   | 32-S  | 43.7216 | 15.99 | Hspca         | NM_010480    | Mus musculus heat shock protein 1, alpha (Hspca), mRNA.                                                     |
| sci53440.6.1  | 16-S  | 43.6909 | 5.4   | BC021614      | NM_144869.1  | Mus musculus cDNA sequence BC021614 (BC021614), mRNA.                                                       |
| sci39384.39.1 | 1-S   | 43.6539 | 2.76  | Abca8a        | NM_153145.1  | Mus musculus ATP-binding cassette, sub-family A (ABC1), member 8a (Abca8a), mRNA.                           |
| sci54743.5    | 163-S | 43.6517 | 1.93  | Gjb1          | NM_008124.2  | Mus musculus gap junction membrane channel protein beta 1 (Gjb1), mRNA.                                     |
| sci24467.10   | 119-S | 43.6422 | 1.81  | Slc35a1       | NM_011895.2  | Mus musculus solute carrier family 35 (CMP-sialic acid transporter), member 1 (Slc35a1), mRNA.              |
| sci072686.1   | 177-S | 43.6403 | 1.42  | Usp24         | XM_131566.5  |                                                                                                             |
| sci000110.1   | 1-S   | 43.6007 | 3.34  | Pex11a        | NM_011068.1  | Mus musculus peroxisomal biogenesis factor 11a (Pex11a), mRNA.                                              |
| sci0394433.1  | 11-S  | 43.5986 | 2.19  | Ugt1a2        | NM_013701.1  |                                                                                                             |
| sci0378462.4  | 10-S  | 43.5587 | 10.58 | Mopt          | NM_194269.1  | Mus musculus protein containing single MORN motif in testis (Mopt), mRNA.                                   |
| sci24025.4.59 | 30-S  | 43.5141 | 10.83 | Dio1          | NM_007860    | Mus musculus deiodinase, iodothyronine, type I (Dio1), mRNA.                                                |
| sci0232087.7  | 6-S   | 43.4649 | 4     | Mat2a         | NM_145569    | Mus musculus methionine adenosyltransferase II, alpha (Mat2a), mRNA.                                        |
| sci34002.14.1 | 30-S  | 43.3883 | 1.66  | 2210415M20Rik | NM_027338.1  | Mus musculus RIKEN cDNA 2210415M20 gene (2210415M20Rik), mRNA.                                              |
| sci33549.18.1 | 0-S   | 43.3418 | 4.63  | 1300002A08Rik | NM_025827.2  | Mus musculus RIKEN cDNA 1300002A08 gene (1300002A08Rik), mRNA.                                              |
| sci00319800.2 | 57-S  | 43.3171 | 6.83  | C730048C13Rik | NM_177002.2  | Mus musculus RIKEN cDNA C730048C13 gene (C730048C13Rik), mRNA.                                              |
| sci43828.6    | 15-S  | 43.2945 | 10.53 | Zfp367        | NM_175494.2  | Mus musculus zinc finger protein 367 (Zfp367), mRNA.                                                        |
| sci39775.19.1 | 132-S | 43.2814 | 4.19  | Dhx40         | NM_026191.1  | Mus musculus DEAH (Asp-Glu-Ala-His) box polypeptide 40 (Dhx40), mRNA.                                       |

|                     |         |       |               |             |                                                                                                            |
|---------------------|---------|-------|---------------|-------------|------------------------------------------------------------------------------------------------------------|
| sci38867.11 23-S    | 43.2642 | 1.41  | Sara1         | NM_009120.1 | Mus musculus SAR1a gene homolog 1 (S. cerevisiae) (Sara1), mRNA.                                           |
| sci0068202.1 15-S   | 43.2328 | 1.5   | Ndufa5        | NM_026614.1 | Mus musculus NADH dehydrogenase (ubiquinone) 1 alpha subcomplex, 5 (Ndufa5), mRNA.                         |
| sci017842.1 177-S   | 43.1846 | 5.19  | Mup3          | NM_010845   | Mus musculus major urinary protein 3 (Mup3), mRNA.                                                         |
| sci43644.9.1 5-S    | 43.1715 | 9.98  | Hexb          | NM_010422.1 | Mus musculus hexosaminidase B (Hexb), mRNA.                                                                |
| sci0071801.2 66-S   | 43.1603 | 12.13 | Plekhf2       | NM_175175.3 | Mus musculus pleckstrin homology domain containing, family F (with FYVE domain) member 2 (Plekhf2), mRNA.  |
| sci0017840.1 66-S   | 43.142  | 2.1   | Mup1          | NM_031188   | Mus musculus major urinary protein 1 (Mup1), mRNA.                                                         |
| sci31224.16 382-S   | 43.1284 | 1.68  | Lrrc28        | NM_175124.3 |                                                                                                            |
| sci30402.11.1 13-S  | 43.121  | 1.92  | BC020002      | NM_145374.1 | Mus musculus cDNA sequence BC020002 (BC020002), mRNA.                                                      |
| sci00243085.1 25-S  | 42.9805 | 2.45  | C730031G17    | NM_172881.1 | Mus musculus hypothetical protein C730031G17 (C730031G17), mRNA.                                           |
| sci055943.5 30-S    | 42.925  | 1.66  | Stx8          | NM_018768.1 | Mus musculus syntaxin 8 (Stx8), mRNA.                                                                      |
| sci50103.16 203-S   | 42.8883 | 1.49  | Mtch1         | NM_019880.2 | Mus musculus mitochondrial carrier homolog 1 (C. elegans) (Mtch1), mRNA.                                   |
| sci079560.1 5-S     | 42.8661 | 2.77  | BC002236      | NM_024475.2 | Mus musculus cDNA sequence BC002236 (BC002236), mRNA.                                                      |
| sci44186.8.1 13-S   | 42.8492 | 11.53 | Gmn           | NM_020567.1 | Mus musculus geminin (Gmn), mRNA.                                                                          |
| sci15808.4.1 196-S  | 42.8339 | 1.46  | C130074G19Rik | NM_178692.2 | Mus musculus RIKEN cDNA C130074G19 gene (C130074G19Rik), mRNA.                                             |
| sci39390.10.1 10-S  | 42.7787 | 2     | BC029169      | NM_153782.1 | Mus musculus cDNA sequence BC029169 (BC029169), mRNA.                                                      |
| sci056088.2 28-S    | 42.7052 | 1.61  | Dscr2         | NM_019537.1 | Mus musculus Down syndrome critical region homolog 2 (human) (Dscr2), mRNA.                                |
| sci37352.6 41-S     | 42.6526 | 1.54  | Cdk2          | NM_016756.1 | Mus musculus cyclin-dependent kinase 2 (Cdk2), mRNA.                                                       |
| sci0066706.2 314-S  | 42.6272 | 1.39  | 4733401H18Rik | NM_023247.1 | Mus musculus RIKEN cDNA 4733401H18 gene (4733401H18Rik), mRNA.                                             |
| sci0056388.2 271-S  | 42.6043 | 8.55  | Cyp3a25       | NM_019792.1 | Mus musculus cytochrome P450, family 3, subfamily a, polypeptide 25 (Cyp3a25), mRNA.                       |
| sci18596.16.1 32-S  | 42.5948 | 3.23  | 4930485D02Rik | NM_175225.2 | Mus musculus RIKEN cDNA 4930485D02 gene (4930485D02Rik), mRNA.                                             |
| sci23497.11 62-S    | 42.5695 | 1.37  | Pex14         | NM_019781.1 | Mus musculus peroxisomal biogenesis factor 14 (Pex14), mRNA.                                               |
| sci44051.9.1 139-S  | 42.5498 | 1.68  | Tbc1d7        | NM_025935.1 | Mus musculus TBC1 domain family, member 7 (Tbc1d7), mRNA.                                                  |
| sci022644.5 265-S   | 42.3915 | 1.43  | Rnf103        | NM_009543.1 | Mus musculus ring finger protein 103 (Rnf103), mRNA.                                                       |
| sci072795.9 17-S    | 42.3877 | 1.66  | Ttc19         | NM_028360.1 |                                                                                                            |
| sci020338.1 17-S    | 42.3559 | 1.49  | Sel1h         | NM_011344.1 | Mus musculus Sel1 (suppressor of lin-12) 1 homolog (C. elegans) (Sel1h), mRNA.                             |
| sci0015039.1 320-S  | 42.2565 | 34.17 | H2-T22        | NM_010397   | Mus musculus histocompatibility 2, T region locus 22 (H2-T22), mRNA.                                       |
| sci48486.9.1 29-S   | 42.1676 | 1.48  | Nr1i2         | NM_010936.1 | Mus musculus nuclear receptor subfamily 1, group 1, member 2 (Nr1i2), mRNA.                                |
| sci069875.2 16-S    | 42.1648 | 1.41  | Ndufa11       | XM_128696.1 |                                                                                                            |
| sci0003351.1 17-S   | 42.1433 | 1.93  | Mkks          | NM_021527.1 | Mus musculus McKusick-Kaufman syndrome protein (Mkks), mRNA.                                               |
| sci0109552.5 10-S   | 42.096  | 1.53  | Sri           | NM_025618.1 | Mus musculus sorcin (Sri), mRNA.                                                                           |
| sci00218103.1 155-S | 42.0923 | 1.36  | Slc17a2       | NM_144836.1 |                                                                                                            |
| sci33416.4.1 0-S    | 42.0811 | 2.39  | Hspc171       | NM_025486.1 |                                                                                                            |
| sci0001652.1 18-S   | 41.9759 | 1.57  | E130307M08Rik | NM_026530.2 | Mus musculus RIKEN cDNA E130307M08 gene (E130307M08Rik), mRNA.                                             |
| sci026893.9 4-S     | 41.9687 | 1.46  | Cops6         | NM_012002.1 | Mus musculus COP9 (constitutive photomorphogenic) homolog, subunit 6 (Arabidopsis thaliana) (Cops6), mRNA. |
| sci00117198.2 233-S | 41.9347 | 4.93  | lns1abp       | NM_028582.2 | Mus musculus influenza virus NS1A binding protein (lns1abp), mRNA.                                         |
| sci000502.1 59-S    | 41.9228 | 2.51  | Prdx5         | NM_012021.1 | Mus musculus peroxiredoxin 5 (Prdx5), mRNA.                                                                |
| sci000477.1 15-S    | 41.7222 | 1.57  | Cutc          | NM_025530.1 |                                                                                                            |
| sci0056248.2 157-S  | 41.7181 | 1.78  | Ak3l          | NM_021299.1 | Mus musculus adenylate kinase 3 alpha-like (Ak3l), mRNA.                                                   |
| sci46585.22 265-S   | 41.7095 | 2.01  | Vcl           | NM_009502   | Mus musculus vinculin (Vcl), mRNA.                                                                         |
| sci000237.1 40-S    | 41.7084 | 1.35  | Vkorc1        | NM_178600.2 | Mus musculus vitamin K epoxide reductase complex, subunit 1 (Vkorc1), mRNA.                                |
| sci051800.6 308-S   | 41.6178 | 1.45  | Bok           | NM_016778   | Mus musculus Bcl-2-related ovarian killer protein (Bok), mRNA.                                             |
| sci29041.8.1 24-S   | 41.5345 | 4.6   | 1810009M01Rik | NM_023056.2 | Mus musculus RIKEN cDNA 1810009M01 gene (1810009M01Rik), mRNA.                                             |
| sci011702.3 204-S   | 41.4724 | 18.9  | Amd1          | NM_009665.2 | Mus musculus S-adenosylmethionine decarboxylase 1 (Amd1), mRNA.                                            |
| sci39662.12.1 73-S  | 41.4102 | 1.45  | Cdk5rap3      | NM_030248.1 | Mus musculus CDK5 regulatory subunit associated protein 3 (Cdk5rap3), mRNA.                                |
| sci0001335.1 10-S   | 41.4101 | 1.42  | BC005682      | NM_033562.2 | Mus musculus cDNA sequence BC005682 (BC005682), mRNA.                                                      |
| sci54116.7.1 56-S   | 41.2997 | 10.03 | Mtcb1         | NM_010839.2 | Mus musculus mature T-cell proliferation 1 (Mtcb1), mRNA.                                                  |
| sci00100273.2 58-S  | 41.2521 | 1.39  | Osbpl9        | NM_133885.1 | Mus musculus oxysterol binding protein-like 9 (Osbp19), mRNA.                                              |
| sci066493.3 45-S    | 41.1645 | 1.48  | Mrpl51        | NM_025595.1 | Mus musculus mitochondrial ribosomal protein L51 (Mrpl51), mRNA.                                           |
| sci0028248.2 31-S   | 41.1584 | 65.93 | Slco1a1       | NM_013797.1 | Mus musculus solute carrier organic anion transporter family, member 1a1 (Slco1a1), mRNA.                  |
| sci36137.8 30-S     | 41.1553 | 1.6   | 1300010K09Rik | NM_138303.1 | Mus musculus RIKEN cDNA 1300010K09 gene (1300010K09Rik), mRNA.                                             |
| sci0011658.2 92-S   | 41.1422 | 2.05  | Alcam         | NM_009655.1 | Mus musculus activated leukocyte cell adhesion molecule (Alcam), mRNA.                                     |
| sci39624.22.175 1-S | 41.1026 | 2.68  | Pparbp        | NM_134027.1 | Mus musculus peroxisome proliferator activated receptor binding protein (Pparbp), mRNA.                    |
| sci25332.2 140-S    | 41.0567 | 1.7   | D4Bwg0951e    | NM_026821.2 | Mus musculus DNA segment, Chr 4, Brigham & Womens Genetics 0951 expressed (D4Bwg0951e), mRNA.              |
| sci23528.23 0-S     | 41.0567 | 1.41  | Mfn2          | NM_133201.1 | Mus musculus mitofusin 2 (Mfn2), mRNA.                                                                     |
| sci0121022.3 149-S  | 41.0451 | 2.37  | Mrps6         | NM_080456.1 | Mus musculus mitochondrial ribosomal protein S6 (Mrps6), mRNA.                                             |
| sci0029869.2 146-S  | 40.9555 | 2.12  | Ulk2          | NM_013881.3 | Mus musculus Unc-51 like kinase 2 (C. elegans) (Ulk2), mRNA.                                               |



|                 |            |         |       |               |             |                                                                                               |
|-----------------|------------|---------|-------|---------------|-------------|-----------------------------------------------------------------------------------------------|
| scl38985.8      | 420-S      | 40.9283 | 1.31  | Cd164         | NM_016898.1 | Mus musculus CD164 antigen (Cd164), mRNA.                                                     |
| scl068097.1     | 32-S       | 40.8096 | 6.44  | 6720463E02Rik | NM_026556.2 | Mus musculus RIKEN cDNA 6720463E02 gene (6720463E02Rik), mRNA.                                |
| scl0050850.1    | 83-S       | 40.807  | 1.82  | Spg4          | NM_016962.1 | Mus musculus spastic paraplegia 4 homolog (human) (Spg4), mRNA.                               |
| scl056258.4     | 7-S        | 40.7793 | 9.09  | Hnrph2        | NM_019868.2 | Mus musculus heterogeneous nuclear ribonucleoprotein H2 (Hnrph2), mRNA.                       |
| scl27602.3.1    | 69-S       | 40.6715 | 9.18  | Cxcl4         | NM_019932.1 | Mus musculus chemokine (C-X-C motif) ligand 4 (Cxcl4), mRNA.                                  |
| scl074155.4     | 43-S       | 40.6602 | 1.48  | 1300002F13Rik | NM_133753.1 | Mus musculus RIKEN cDNA 1300002F13 gene (1300002F13Rik), mRNA.                                |
| scl027556.1     | 96-S       | 40.6168 | 1.6   | Clic4         | XM_124389.1 | Mus musculus chloride intracellular channel 4 (mitochondrial) (Clic4), mRNA.                  |
| scl00214498.1   | 240-S      | 40.4796 | 3.71  | Hrpl2         | NM_145991.1 |                                                                                               |
| scl54163.9.1    | 4-S        | 40.4204 | 9.71  | 1110020L19Rik | NM_028633.1 | Mus musculus RIKEN cDNA 1110020L19 gene (1110020L19Rik), mRNA.                                |
| scl016621.1     | 40-S       | 40.4044 | 1.47  | Klkb1         | NM_008455   | Mus musculus kallikrein B, plasma 1 (Klkb1), mRNA.                                            |
| scl0001351.1    | 1-S        | 40.3706 | 2.17  | Afmid         | NM_027827.2 | Mus musculus arylformamidase (Afmid), mRNA.                                                   |
| scl0004104.1    | 48-S       | 40.2801 | 1.35  | Ttc11         | NM_025562.1 | Mus musculus tetratricopeptide repeat domain 11 (Ttc11), mRNA.                                |
| scl22110.22.1   | 30-S       | 40.2155 | 1.5   | Dhx36         | NM_028136.1 | Mus musculus DEAH (Asp-Glu-Ala-His) box polypeptide 36 (Dhx36), mRNA.                         |
| scl38781.10     | 357-S      | 40.1877 | 1.45  | Zwint         | NM_025635.1 |                                                                                               |
| scl50306.11.1   | 132-S      | 40.1244 | 1.62  | Slc22a1       | NM_009202.2 | Mus musculus solute carrier family 22 (organic cation transporter), member 1 (Slc22a1), mRNA. |
| scl22729.4.1    | 31-S       | 40.0945 | 2.73  | Amigo         | NM_146137.1 | Mus musculus amphoterin induced gene and ORF (Amigo), mRNA.                                   |
| scl014104.1     | 1-S        | 40.0814 | 2.22  | Fasn          | NM_007988.1 | Mus musculus fatty acid synthase (Fasn), mRNA.                                                |
| scl014979.1     | 326-S      | 40.0796 | 1.52  | H2-Ke6        | NM_013543.1 | Mus musculus H2-K region expressed gene 6 (H2-Ke6), mRNA.                                     |
| scl29249.10     | 180-S      | 39.9928 | 1.54  | Tm4sf12       | NM_173007.1 | Mus musculus transmembrane 4 superfamily member 12 (Tm4sf12), mRNA.                           |
| scl018550.2     | 67-S       | 39.9726 | 1.62  | Furin         | NM_011046.1 | Mus musculus furin (paired basic amino acid cleaving enzyme) (Furin), mRNA.                   |
| scl54178.10     | 163-S      | 39.9602 | 1.43  | Mic21l        | NM_138309.1 | Mus musculus MIC2 (monoclonal Imperial Cancer Research Fund 2)-like 1 (Mic21l), mRNA.         |
| scl41808.6      | 29-S       | 39.8865 | 1.37  | Rab1          | NM_008996.2 | Mus musculus RAB1, member RAS oncogene family (Rab1), mRNA.                                   |
| scl39705.9.188  | 7-S        | 39.8781 | 11.19 | 6820428D13    | NM_177752.2 | Mus musculus hypothetical protein 6820428D13 (6820428D13), mRNA.                              |
| scl0002141.1    | 52-S       | 39.8773 | 4.76  | Cth           | NM_145953.2 | Mus musculus cystathionase (cystathionine gamma-lyase) (Cth), mRNA.                           |
| scl00228410.1   | 260-S      | 39.8766 | 4.83  | Cstf3         | NM_145529.1 | Mus musculus cleavage stimulation factor, 3 pre-RNA, subunit 3 (Cstf3), mRNA.                 |
| scl0270802.1    | 64-S       | 39.8693 | 10.53 | BC048403      | NM_173022.2 | Mus musculus cDNA sequence BC048403 (BC048403), mRNA.                                         |
| scl22902.7.1    | 30-S       | 39.7862 | 1.97  | Mrp19         | NM_030116.1 | Mus musculus mitochondrial ribosomal protein L9 (Mrp19), mRNA.                                |
| scl014870.5     | 30-S       | 39.6576 | 3.52  | Gstp1         | NM_013541.1 | Mus musculus glutathione S-transferase, pi 1 (Gstp1), mRNA.                                   |
| scl0077963.1    | 19-S       | 39.4568 | 2.6   | Hook1         | NM_030014.2 | Mus musculus hook homolog 1 (Drosophila) (Hook1), mRNA.                                       |
| scl47433.16.555 | 11-S       | 39.4529 | 1.88  | Ghr           | NM_010284.1 | Mus musculus growth hormone receptor (Ghr), mRNA.                                             |
| scl45915.9      | 517-S      | 39.4398 | 1.61  | Dnase1l3      | NM_007870.2 | Mus musculus deoxyribonuclease 1-like 3 (Dnase1l3), mRNA.                                     |
| scl00002.1      | 228 REVCOM | 39.4259 | 2.54  | 2610024E20Rik | NM_146084.1 |                                                                                               |
| scl50948.6.850  | 26-S       | 39.4102 | 1.6   | Atp6v0e       | NM_025272.1 | Mus musculus ATPase, H+ transporting, V0 subunit (Atp6v0e), mRNA.                             |
| scl31674.3.1    | 6-S        | 39.3602 | 1.69  | Apoc1         | NM_007469.2 | Mus musculus apolipoprotein C-1 (Apoc1), mRNA.                                                |
| scl0015547.2    | 255-S      | 39.3019 | 3.13  | Htf9c         | NM_008307.1 | Mus musculus Hpal tiny fragments locus 9c (Htf9c), mRNA.                                      |
| scl39898.9.1    | 17-S       | 39.2944 | 1.63  | Pipox         | NM_008952.1 | Mus musculus pipecolic acid oxidase (Pipox), mRNA.                                            |
| scl0002408.1    | 16-S       | 39.2848 | 2.19  | Timm10        | NM_013896.2 | Mus musculus translocase of inner mitochondrial membrane 10 homolog (yeast) (Timm10), mRNA.   |
| scl44090.4      | 104-S      | 39.2644 | 1.53  | Nrn1          | NM_153529.1 | Mus musculus neuritin 1 (Nrn1), mRNA.                                                         |
| scl50009.17.1   | 17-S       | 39.0358 | 1.46  | C2            | NM_013484.1 | Mus musculus complement component 2 (within H-2S) (C2), mRNA.                                 |
| scl075007.4     | 290-S      | 38.9243 | 1.32  | 4930504E06Rik | NM_133858.2 | Mus musculus RIKEN cDNA 4930504E06 gene (4930504E06Rik), mRNA.                                |
| scl29258.5.1    | 11-S       | 38.9171 | 6.8   | Wnt2          | NM_023653.3 | Mus musculus wingless-related MMTV integration site 2 (Wnt2), mRNA.                           |
| scl0093765.1    | 4-S        | 38.8736 | 2.09  | Ube2n         | NM_080560.2 | Mus musculus ubiquitin-conjugating enzyme E2N (Ube2n), mRNA.                                  |
| scl011972.1     | 247-S      | 38.8354 | 1.47  | Atp6v0d1      | NM_013477.2 | Mus musculus ATPase, H+ transporting, V0 subunit D isoform 1 (Atp6v0d1), mRNA.                |
| scl0020365.1    | 201-S      | 38.7434 | 2.36  | Serf1         | NM_011353.1 | Mus musculus small EDPR-rich factor 1 (Serf1), mRNA.                                          |
| scl0210766.8    | 41-S       | 38.7328 | 8.2   | C6.1A         | NM_145956.2 | Mus musculus c6.1a protein (C6.1A), mRNA.                                                     |
| scl32196.12     | 2-S        | 38.5992 | 13.62 | Wee1          | NM_009516.2 | Mus musculus wee 1 homolog (S. pombe) (Wee1), mRNA.                                           |
| scl019244.5     | 2-S        | 38.5624 | 1.3   | Ptp4a2        | NM_008974.2 | Mus musculus protein tyrosine phosphatase 4a2 (Ptp4a2), mRNA.                                 |
| scl54835.8.1    | 3-S        | 38.4603 | 1.86  | D0HXS9928E    | NM_138607.1 | Mus musculus DNA segment, human DXS9928E (D0HXS9928E), mRNA.                                  |
| scl0015081.1    | 185-S      | 38.4536 | 1.86  | H3f3b         | NM_008211.2 | Mus musculus H3 histone, family 3B (H3f3b), mRNA.                                             |
| scl54205.32.1   | 100-S      | 38.4249 | 8.62  | Atp11c        | XM_135900.3 |                                                                                               |
| scl0110265.1    | 302-S      | 38.3812 | 24.68 | MsrA          | NM_026322.2 | Mus musculus methionine sulfoxide reductase A (MsrA), mRNA.                                   |
| scl0014751.2    | 296-S      | 38.3476 | 1.53  | Gpi1          | NM_008155.1 | Mus musculus glucose phosphate isomerase 1 (Gpi1), mRNA.                                      |
| scl00104479.1   | 248-S      | 38.3366 | 2.71  | BC018601      | NM_134033.1 | Mus musculus cDNA sequence BC018601 (BC018601), mRNA.                                         |
| scl070425.3     | 227-S      | 38.3105 | 1.4   | Csnk1g3       | NM_152809.1 | Mus musculus casein kinase 1, gamma 3 (Csnk1g3), mRNA.                                        |
| scl0002087.1    | 19-S       | 38.3068 | 1.74  | BC037135      | NM_173763.2 | Mus musculus cDNA sequence BC037135 (BC037135), mRNA.                                         |
| scl34274.4      | 380-S      | 38.297  | 1.45  | 4632417N05Rik | NM_028725.1 | Mus musculus RIKEN cDNA 4632417N05 gene (4632417N05Rik), mRNA.                                |

|                     |         |       |               |             |                                                                                                              |
|---------------------|---------|-------|---------------|-------------|--------------------------------------------------------------------------------------------------------------|
| sci21980.4.1 109-S  | 38.2791 | 1.47  | 1700021C14Rik | XM 355444.1 | Mus musculus RIKEN cDNA 1700021C14 gene (1700021C14Rik), mRNA.                                               |
| sci33169.8.1 16-S   | 38.2705 | 1.58  | 2310079N02Rik | NM 025636.1 | Mus musculus RIKEN cDNA 2310079N02 gene (2310079N02Rik), mRNA.                                               |
| sci49378.5 417-S    | 38.2557 | 1.56  | Snap29        | NM 023348.3 | Mus musculus synaptosomal-associated protein (Snap29), mRNA.                                                 |
| sci0068421.2 70-S   | 38.0946 | 4.26  | 0910001K20Rik | NM 026719.1 | Mus musculus RIKEN cDNA 0910001K20 gene (0910001K20Rik), mRNA.                                               |
| sci013445.1 266-S   | 38.0813 | 1.41  | Cdk2ap1       | NM 013812.1 | Mus musculus CDK2 (cyclin-dependent kinase 2)-associated protein 1 (Cdk2ap1), mRNA.                          |
| sci0225256.19 24-S  | 38.0498 | 9.65  | Dsg1b         | NM 181682.1 | Mus musculus desmoglein 1 beta (Dsg1b), mRNA.                                                                |
| sci0019211.1 81-S   | 38.0168 | 2.09  | Pten          | NM 008960.1 | Mus musculus phosphatase and tensin homolog (Pten), mRNA.                                                    |
| sci54440.26.1 53-S  | 38.0061 | 3.02  | Hdac6         | NM 010413   | Mus musculus histone deacetylase 6 (Hdac6), mRNA.                                                            |
| sci0012091.2 274-S  | 37.9884 | 1.46  | Glb1          | NM 009752.1 | Mus musculus galactosidase, beta 1 (Glb1), mRNA.                                                             |
| sci0002653.1 3-S    | 37.9788 | 3.91  | Gcipp1        | NM 026780.1 | Mus musculus GCIP-interacting protein p29 (Gcipp1), mRNA.                                                    |
| sci076295.3 96-S    | 37.9646 | 2.11  | Atp11b        | XM 358349.1 | Mus musculus ATPase, Class VI, type 11B (Atp11b), mRNA.                                                      |
| sci28198.16.9 0-S   | 37.8425 | 2.57  | 4933424B01Rik | NM 138757.1 | Mus musculus RIKEN cDNA 4933424B01 gene (4933424B01Rik), mRNA.                                               |
| sci0001438.1 12-S   | 37.7821 | 1.69  | Copz2         | NM 019877.1 | Mus musculus coatamer protein complex, subunit zeta 2 (Copz2), mRNA.                                         |
| sci056508.28 32-S   | 37.7518 | 8.82  | Rapgef4       | NM 019688.1 | Mus musculus Rap guanine nucleotide exchange factor (GEF) 4 (Rapgef4), mRNA.                                 |
| sci40876.7.1 108-S  | 37.7239 | 2.02  | Rad52b        | NM 025654.1 | Mus musculus RAD52 homolog B (S. cerevisiae) (Rad52b), mRNA.                                                 |
| sci0080898.1 95-S   | 37.7058 | 9.71  | Arts1         | NM 030711.2 | Mus musculus type 1 tumor necrosis factor receptor shedding aminopeptidase regulator (Arts1), mRNA.          |
| sci30691.10.4 70-S  | 37.6999 | 1.6   | 2210013K02Rik | NM 023712   | Mus musculus RIKEN cDNA 2210013K02 gene (2210013K02Rik), mRNA.                                               |
| sci42936.6.9 32-S   | 37.6127 | 1.74  | Ahsa1         | NM 146036.1 | Mus musculus AHA1, activator of heat shock 90kDa protein ATPase homolog 1 (yeast) (Ahsa1), mRNA.             |
| sci0001405.1 534-S  | 37.61   | 5.68  | Spag9         | NM 027569.1 | Mus musculus sperm associated antigen 9 (Spag9), mRNA.                                                       |
| sci0003706.1 56-S   | 37.6062 | 9.93  | 4833420G17Rik | NM 026127   | Mus musculus RIKEN cDNA 4833420G17 gene (4833420G17Rik), mRNA.                                               |
| sci35797.7.1 123-S  | 37.5603 | 1.36  | Comm4         | NM 025417.1 | Mus musculus COMM domain containing 4 (Comm4), mRNA.                                                         |
| sci0003818.1 1-S    | 37.5215 | 8.15  | D10Ert610e    | NM 028027.1 | Mus musculus DNA segment, Chr 10, ERATO Doi 610, expressed (D10Ert610e), mRNA.                               |
| sci35165.21 648-S   | 37.4968 | 1.92  | Fyco1         | NM 148925.1 | Mus musculus FYVE and coiled-coil domain containing 1 (Fyco1), mRNA.                                         |
| sci0108112.2 25-S   | 37.4887 | 3.32  | Eif4ebp3      | NM 201256.2 | Mus musculus eukaryotic translation initiation factor 4E binding protein 3 (Eif4ebp3), mRNA.                 |
| sci47043.17.1 62-S  | 37.4807 | 2.08  | Bop1          | NM 013481.1 | Mus musculus block of proliferation 1 (Bop1), mRNA.                                                          |
| sci26959.5.1 79-S   | 37.3971 | 1.29  | 2510048O06Rik | NM 025624.1 | Mus musculus RIKEN cDNA 2510048O06 gene (2510048O06Rik), mRNA.                                               |
| sci0004139.1 41-S   | 37.3289 | 6.43  | Asrj          | NM 023429.2 | Mus musculus asrj protein (Asrj), mRNA.                                                                      |
| sci22956.4.1 1-S    | 37.328  | 1.33  | Jtb           | NM 206924.1 | Mus musculus jumping translocation breakpoint (Jtb), mRNA.                                                   |
| sci0027059.2 196-S  | 37.3217 | 1.38  | Sh3d19        | NM 012059.2 | Mus musculus SH3 domain protein D19 (Sh3d19), mRNA.                                                          |
| sci073373.8 41-S    | 37.3142 | 1.48  | 1700048E23Rik | NM 028521.1 | Mus musculus RIKEN cDNA 1700048E23 gene (1700048E23Rik), mRNA.                                               |
| sci00226016.2 58-S  | 37.3071 | 6.38  | 5730446C15Rik | NM 146096.2 | Mus musculus RIKEN cDNA 5730446C15 gene (5730446C15Rik), mRNA.                                               |
| sci21094.18.34 0-S  | 37.2625 | 1.53  | Lrrc8         | NM 177725.2 | Mus musculus leucine-rich repeat-containing 8 (Lrrc8), mRNA.                                                 |
| sci27119.4.1 2-S    | 37.2507 | 1.37  | Polr2j        | NM 011293.1 | Mus musculus polymerase (RNA) II (DNA directed) polypeptide J (Polr2j), mRNA.                                |
| sci53313.7 541-S    | 37.2015 | 2.98  | Gna14         | NM 008137.2 | Mus musculus guanine nucleotide binding protein, alpha 14 (Gna14), mRNA.                                     |
| sci0001042.1 14-S   | 37.0785 | 4.05  | Mrps25        | NM 025578.2 | Mus musculus mitochondrial ribosomal protein S25 (Mrps25), mRNA.                                             |
| sci0003111.1 1260-S | 37.0609 | 3.23  | Pfkfb3        | NM 133232.1 | Mus musculus 6-phosphofructo-2-kinase/fructose-2,6-bisphosphatase 3 (Pfkfb3), mRNA.                          |
| sci0003179.1 0-S    | 36.8875 | 3.49  | 2310047O13Rik | NM 024185.3 | Mus musculus RIKEN cDNA 2310047O13 gene (2310047O13Rik), mRNA.                                               |
| sci0004146.1 45-S   | 36.8625 | 1.71  | Dhrs8         | NM 053262.2 | Mus musculus dehydrogenase/reductase (SDR family) member 8 (Dhrs8), mRNA.                                    |
| sci0068730.1 249-S  | 36.8473 | 1.44  | 1110032N12Rik | NM 026824.2 | Mus musculus RIKEN cDNA 1110032N12 gene (1110032N12Rik), mRNA.                                               |
| sci0017357.2 64-S   | 36.8353 | 3.24  | Mip           | NM 010807.2 | Mus musculus MARCKS-like protein (Mip), mRNA.                                                                |
| sci070612.1 126-S   | 36.8302 | 1.66  | 5730494N06Rik | NM 027478.1 | Mus musculus RIKEN cDNA 5730494N06 gene (5730494N06Rik), mRNA.                                               |
| sci098366.1 53-S    | 36.826  | 3.34  | Smap1         | NM 028534.1 | Mus musculus stromal membrane-associated protein 1 (Smap1), mRNA.                                            |
| sci0013096.1 55-S   | 36.811  | 1.39  | Cyp2c37       | NM 010001.1 | Mus musculus cytochrome P450, family 2, subfamily c, polypeptide 37 (Cyp2c37), mRNA.                         |
| sci066475.2 30-S    | 36.7992 | 2.94  | Rps23         | NM 024175   | Mus musculus ribosomal protein S23 (Rps23), mRNA.                                                            |
| sci53577.7 510-S    | 36.7701 | 4.08  | Prps2         | NM 026662.2 | Mus musculus phosphoribosyl pyrophosphate synthetase 2 (Prps2), mRNA.                                        |
| sci020317.1 68-S    | 36.7345 | 1.41  | Serpinf1      | NM 011340.2 | Mus musculus serine (or cysteine) proteinase inhibitor, clade F, member 1 (Serpinf1), mRNA.                  |
| sci000603.1 82-S    | 36.724  | 1.55  | 1810047C23Rik | NM 138668.1 | Mus musculus RIKEN cDNA 1810047C23 gene (1810047C23Rik), mRNA.                                               |
| sci015903.3 124-S   | 36.7126 | 1.62  | Idb3          | NM 008321.1 | Mus musculus inhibitor of DNA binding 3 (Idb3), mRNA.                                                        |
| sci44304.18 267-S   | 36.6937 | 1.69  | Gtbbp4        | NM 027000.2 | Mus musculus GTP binding protein 4 (Gtbbp4), mRNA.                                                           |
| sci067245.8 3-S     | 36.6677 | 3.74  | Pel1          | NM 030015.1 | Mus musculus pellino 1 (Pel1), mRNA.                                                                         |
| sci22547.4.5 11-S   | 36.6046 | 1.37  | Adh1          | NM 007409.2 | Mus musculus alcohol dehydrogenase 1 (class I) (Adh1), mRNA.                                                 |
| sci0229905.15 25-S  | 36.5835 | 2.73  | BC037135      | NM 173763.2 | Mus musculus cDNA sequence BC037135 (BC037135), mRNA.                                                        |
| sci52435.3.1 22-S   | 36.5236 | 1.32  | Mpl43         | NM 053164.2 | Mus musculus mitochondrial ribosomal protein L43 (Mpl43), nuclear gene encoding mitochondrial protein, mRNA. |
| sci019942.4 1-S     | 36.523  | 1.29  | Rpl27         | NM 011289   | Mus musculus ribosomal protein L27 (Rpl27), mRNA.                                                            |
| sci071782.13 18-S   | 36.493  | 10.17 | D5Ert658e     | NM 027922.1 |                                                                                                              |
| sci41695.7 133-S    | 36.4434 | 2.92  | Pank3         | NM 145962.1 | Mus musculus pantothenate kinase 3 (Pank3), mRNA.                                                            |

|                       |         |       |               |             |                                                                                                                                               |
|-----------------------|---------|-------|---------------|-------------|-----------------------------------------------------------------------------------------------------------------------------------------------|
| sc10001073.1 120-S    | 36.4318 | 1.63  | Cxcl12        | NM_021704.1 | Mus musculus chemokine (C-X-C motif) ligand 12 (Cxcl12), transcript variant 2, mRNA.                                                          |
| sc141419.7.1 12-S     | 36.3804 | 8.6   | A730055C05Rik | NM_177392.1 | Mus musculus RIKEN cDNA A730055C05 gene (A730055C05Rik), mRNA.                                                                                |
| sc129171.13.1 11-S    | 36.338  | 14.45 | Chchd3        | NM_025336.1 | Mus musculus coiled-coil-helix-coiled-coil-helix domain containing 3 (Chchd3), mRNA.                                                          |
| sc100380773.1 71-S    | 36.3375 | 1.34  | 1810035L17Rik | XM_354684.1 |                                                                                                                                               |
| sc141212.9.1 219-S    | 36.3113 | 5.87  | Rab34         | NM_033475.2 | Mus musculus RAB34, member of RAS oncogene family (Rab34), mRNA.                                                                              |
| sc126412.9 31-S       | 36.2483 | 1.97  | Sult1d1       | NM_016771.2 | Mus musculus sulfotransferase family 1D, member 1 (Sult1d1), mRNA.                                                                            |
| sc1017776.1 270-S     | 36.2365 | 1.43  | Mast2         | NM_008641.1 | Mus musculus microtubule associated serine/threonine kinase 2 (Mast2), mRNA.                                                                  |
| sc130509.9.1 6-S      | 36.2361 | 1.98  | Sirt3         | NM_022433.1 | Mus musculus sirtuin 3 (silent mating type information regulation 2, homolog) 3 (S. cerevisiae) (Sirt3), mRNA.                                |
| sc10076895.2 316-S    | 36.1352 | 7.84  | Bicd2         | NM_029791.2 | Mus musculus bicaudal D homolog 2 (Drosophila) (Bicd2), mRNA.                                                                                 |
| sc139620.4 46-S       | 36.1326 | 1.31  | 1810046J19Rik | NM_025559.1 | Mus musculus RIKEN cDNA 1810046J19 gene (1810046J19Rik), mRNA.                                                                                |
| sc18778.5 150-S       | 36.1208 | 2.8   | 2810002D13Rik | NM_025657.2 | Mus musculus RIKEN cDNA 2810002D13 gene (2810002D13Rik), mRNA.                                                                                |
| sc1078038.2 5-S       | 36.0694 | 1.64  | Mccc2         | XM_127493.3 |                                                                                                                                               |
| sc124777.7.1 203-S    | 36.0553 | 1.31  | Akr7a5        | NM_025337.2 | Mus musculus aldo-keto reductase family 7, member A5 (aflatoxin aldehyde reductase) (Akr7a5), mRNA.                                           |
| sc1023825.3 146-S     | 36.04   | 1.62  | Banf1         | NM_011793.2 | Mus musculus barrier to autointegration factor 1 (Banf1), mRNA.                                                                               |
| sc100319800.2 168-S   | 35.931  | 10.28 | C730048C13Rik | NM_177002.2 | Mus musculus RIKEN cDNA C730048C13 gene (C730048C13Rik), mRNA.                                                                                |
| sc149765.36 30-S      | 35.9148 | 5.29  | Ptprs         | NM_011218.1 | Mus musculus protein tyrosine phosphatase, receptor type, S (Ptprs), mRNA.                                                                    |
| sc121518.7.1 44-S     | 35.9116 | 1.45  | Nola1         | NM_026578.1 | Mus musculus nucleolar protein family A, member 1 (H/ACA small nucleolar RNPs) (Nola1), mRNA.                                                 |
| gj_21070949 ref NM 01 | 35.9078 | 2.68  | Ubc           | XM_147315.1 | Mus musculus ubiquitin C (Ubc), mRNA.                                                                                                         |
| sc10067179.2 115-S    | 35.9063 | 5.22  | 2610528H13Rik | NM_145944.1 | Mus musculus RIKEN cDNA 2610528H13 gene (2610528H13Rik), mRNA.                                                                                |
| sc1059050.2 22-S      | 35.8524 | 1.34  | 5730427N09Rik | NM_021552.1 | Mus musculus RIKEN cDNA 5730427N09 gene (5730427N09Rik), mRNA.                                                                                |
| sc125467.19.1 1-S     | 35.7928 | 3.84  | 1300002K09Rik | XM_283962.2 | Mus musculus RIKEN cDNA 1300002K09 gene (1300002K09Rik), mRNA.                                                                                |
| sc134232.7.1 77-S     | 35.7911 | 1.73  | Car5a         | NM_007608.1 | Mus musculus carbonic anhydrase 5a, mitochondrial (Car5a), mRNA.                                                                              |
| sc10268741.7 16-S     | 35.7631 | 1.88  | 5730589K01Rik | NM_023434   | Mus musculus RIKEN cDNA 5730589K01 gene (5730589K01Rik), mRNA.                                                                                |
| sc121990.8.1 193-S    | 35.7604 | 1.67  | Prcc          | NM_033573.1 | Mus musculus papillary renal cell carcinoma (translocation-associated) (Prcc), mRNA.                                                          |
| sc115945.4.1 0-S      | 35.7475 | 1.31  | 1110021H02Rik | NM_025388.1 | Mus musculus RIKEN cDNA 1110021H02 gene (1110021H02Rik), mRNA.                                                                                |
| sc130153.32 359-S     | 35.7339 | 1.73  | Mgam          | XM_133071.2 |                                                                                                                                               |
| sc150998.1 28-S       | 35.6952 | 1.31  | Mrps34        | NM_023260.1 | Mus musculus mitochondrial ribosomal protein S34 (Mrps34), mRNA.                                                                              |
| sc1015500.15 97-S     | 35.6543 | 11.7  | Hsf2          | NM_008297.2 | Mus musculus heat shock factor 2 (Hsf2), mRNA.                                                                                                |
| sc148728.3.1 20-S     | 35.6387 | 1.6   | 2410018G20Rik | XM_148413.1 | Mus musculus RIKEN cDNA 2410018G20 gene (2410018G20Rik), mRNA.                                                                                |
| sc140067.6.1 43-S     | 35.6251 | 2.03  | 2310004I24Rik | NM_025510.1 | Mus musculus RIKEN cDNA 2310004I24 gene (2310004I24Rik), mRNA.                                                                                |
| sc147912.4.1 215-S    | 35.6056 | 8.77  | Mal2          | NM_178920.2 |                                                                                                                                               |
| sc1066552.3 24-S      | 35.5447 | 9.45  | 2010106G01Rik | NM_023220.1 | Mus musculus RIKEN cDNA 2010106G01 gene (2010106G01Rik), mRNA.                                                                                |
| sc140724.4.1 15-S     | 35.5447 | 1.54  | Mrps7         | NM_025305.1 | Mus musculus mitochondrial ribosomal protein S7 (Mrps7), mRNA.                                                                                |
| sc1067153.8 8-S       | 35.4821 | 1.85  | 2610207P08Rik | XM_127746.2 | Mus musculus RIKEN cDNA 2610207P08 gene (2610207P08Rik), mRNA.                                                                                |
| sc10067246.1 211-S    | 35.4237 | 7.05  | 2810474O19Rik | XM_132966.3 | Mus musculus RIKEN cDNA 2810474O19 gene (2810474O19Rik), mRNA.                                                                                |
| sc10011552.1 302-S    | 35.3712 | 2.11  | Adra2b        | NM_009633.2 | Mus musculus adrenergic receptor, alpha 2b (Adra2b), mRNA.                                                                                    |
| sc121831.10.1 25-S    | 35.3109 | 1.64  | Ecm1          | NM_007899   | Mus musculus extracellular matrix protein 1 (Ecm1), mRNA.                                                                                     |
| sc1014073.1 90-S      | 35.2632 | 1.34  | Faah          | NM_010173.2 | Mus musculus fatty acid amide hydrolase (Faah), mRNA.                                                                                         |
| sc147735.7 191-S      | 35.2601 | 1.58  | Syngn1        | NM_207708.1 | Mus musculus synaptogyrin 1 (Syngn1), transcript variant 1b, mRNA.                                                                            |
| sc141644.4 98-S       | 35.2514 | 1.42  | Crsp9         | NM_025426.2 | Mus musculus cofactor required for Sp1 transcriptional activation, subunit 9 (Crsp9), mRNA.                                                   |
| sc125510.19.1 73-S    | 35.2457 | 2.98  | Npr2          | NM_173788.2 | Mus musculus natriuretic peptide receptor 2 (Npr2), mRNA.                                                                                     |
| sc10012055.2 161-S    | 35.2124 | 1.39  | Bcl7c         | NM_009746   | Mus musculus B-cell CLL/lymphoma 7C (Bcl7c), mRNA.                                                                                            |
| sc1072587.6 94-S      | 35.1696 | 9.43  | 2700050F09Rik | NM_028291.2 | Mus musculus RIKEN cDNA 2700050F09 gene (2700050F09Rik), mRNA.                                                                                |
| sc10019264.1 208-S    | 35.1624 | 9.62  | Ptprc         | NM_011210.1 | Mus musculus protein tyrosine phosphatase, receptor type, C (Ptprc), mRNA.                                                                    |
| gj_32129296 ref NM 00 | 35.1546 | 1.63  | Rpl13a        | NM_009438.3 | Mus musculus ribosomal protein L13a (Rpl13a), mRNA.                                                                                           |
| sc124957.6.1 12-S     | 35.1541 | 1.3   | Psmb2         | NM_011970.2 | Mus musculus proteasome (prosome, macropain) subunit, beta type 2 (Psmb2), mRNA.                                                              |
| sc10001814.1 15-S     | 35.0991 | 1.63  | Magmas        | NM_025571.1 | Mus musculus mitochondria-associated protein involved in granulocyte-macrophage colony-stimulating factor signal transduction (Magmas), mRNA. |
| sc10072544.1 107-S    | 35.0853 | 8.91  | Exosc6        | NM_028274.1 | Mus musculus exosome component 6 (Exosc6), mRNA.                                                                                              |
| sc1068763.4 12-S      | 35.0641 | 1.69  | 1110038B12Rik | XM_359415.1 | Mus musculus RIKEN cDNA 1110038B12 gene (1110038B12Rik), mRNA.                                                                                |
| sc1068877.8 322-S     | 35.0571 | 1.33  | Maf1          | NM_026859.2 | Mus musculus MAF1 homolog (yeast) (Maf1), mRNA.                                                                                               |
| sc150839.12.1 25-S    | 35.0422 | 9.12  | Bing4         | NM_020603.2 | Mus musculus BING4 protein (Bing4), mRNA.                                                                                                     |
| sc128771.4 14-S       | 35.0343 | 1.35  | Spr           | NM_011467.1 | Mus musculus sepiapterin reductase (Spr), mRNA.                                                                                               |
| sc135013.8.1 0-S      | 35.0185 | 1.39  | 2810037C03Rik | NM_024240.3 | Mus musculus RIKEN cDNA 2810037C03 gene (2810037C03Rik), mRNA.                                                                                |
| sc151536.11 7-S       | 35.0089 | 1.45  | Etf1          | NM_144866.2 | Mus musculus eukaryotic translation termination factor 1 (Etf1), mRNA.                                                                        |
| sc1014375.11 27-S     | 35.004  | 1.85  | G22p1         | NM_010247.1 | Mus musculus thyroid autoantigen (G22p1), mRNA.                                                                                               |
| sc141586.4 460-S      | 34.997  | 1.45  | D11Ert497e    | NM_029976.2 | Mus musculus DNA segment, Chr 11, ERATo Doi 497, expressed (D11Ert497e), mRNA.                                                                |

|                     |         |       |               |             |                                                                                                 |
|---------------------|---------|-------|---------------|-------------|-------------------------------------------------------------------------------------------------|
| scl23453.4 99-S     | 34.9745 | 1.4   | 1200015A19Rik | NM_026388.1 | Mus musculus RIKEN cDNA 1200015A19 gene (1200015A19Rik), mRNA.                                  |
| scl37374.5.1 9-S    | 34.9664 | 10.87 | Hsd17b9       | NM_013786.2 | Mus musculus hydroxysteroid (17-beta) dehydrogenase 9 (Hsd17b9), mRNA.                          |
| scl31469.3.28 7-S   | 34.9586 | 1.49  | D7Rp2e        | NM_033080.1 | Mus musculus DNA segment, Chr 7, Roswell Park 2 complex, expressed (D7Rp2e), mRNA.              |
| scl50887.7 31-S     | 34.9354 | 2.01  | Tex27         | NM_148926.1 | Mus musculus testis expressed gene 27 (Tex27), mRNA.                                            |
| scl46955.19 187-S   | 34.9123 | 1.8   | B230369L08Rik | NM_194342   |                                                                                                 |
| scl079264.1 0-S     | 34.9004 | 9.98  | Ccm1          | NM_030675.2 | Mus musculus cerebral cavernous malformations 1 (Ccm1), mRNA.                                   |
| scl29342.18 151-S   | 34.881  | 1.59  | 1810060J02Rik | NM_025911.1 | Mus musculus RIKEN cDNA 1810060J02 gene (1810060J02Rik), mRNA.                                  |
| scl50581.4.1 28-S   | 34.8346 | 1.53  | 2310045B01Rik | NM_025538.1 | Mus musculus RIKEN cDNA 2310045B01 gene (2310045B01Rik), mRNA.                                  |
| scl28581.11 0-S     | 34.828  | 8.9   | Pdzrn3        | NM_018884.1 |                                                                                                 |
| scl072121.12 86-S   | 34.8223 | 2.48  | 2010308M01Rik | NM_131083.2 | Mus musculus RIKEN cDNA 2010308M01 gene (2010308M01Rik), mRNA.                                  |
| scl059022.3 20-S    | 34.8218 | 1.32  | Edf1          | NM_021519.1 | Mus musculus endothelial differentiation-related factor 1 (Edf1), mRNA.                         |
| scl53032.9 15-S     | 34.818  | 1.9   | Habp2         | NM_146101.1 | Mus musculus hyaluronic acid binding protein 2 (Habp2), mRNA.                                   |
| scl050790.1 73-S    | 34.8152 | 3.21  | Acs4          | NM_207625.1 | Mus musculus acyl-CoA synthetase long-chain family member 4 (Acs4), transcript variant 2, mRNA. |
| scl000906.1 50-S    | 34.8082 | 1.82  | Acadl         | NM_007381.2 | Mus musculus acetyl-Coenzyme A dehydrogenase, long-chain (Acadl), mRNA.                         |
| scl31073.10 61-S    | 34.753  | 1.54  | 3110005P07Rik | NM_022985.3 |                                                                                                 |
| scl056347.10 39-S   | 34.7313 | 1.77  | Eif3s8        | NM_146200   | Mus musculus eukaryotic translation initiation factor 3, subunit 8 (Eif3s8), mRNA.              |
| scl066659.9 78-S    | 34.714  | 1.55  | Acp6          | NM_019800.1 | Mus musculus acid phosphatase 6, lysophosphatidic (Acp6), mRNA.                                 |
| scl0066989.1 296-S  | 34.6937 | 1.59  | 2410004N11Rik | NM_025888.2 | Mus musculus RIKEN cDNA 2410004N11 gene (2410004N11Rik), mRNA.                                  |
| scl31031.8.1 28-S   | 34.6921 | 1.57  | 1810020D17Rik | NM_183251.2 | Mus musculus RIKEN cDNA 1810020D17 gene (1810020D17Rik), mRNA.                                  |
| scl099712.1 51-S    | 34.6319 | 1.6   | Cept1         | NM_133869.2 | Mus musculus choline/ethanolaminephosphotransferase 1 (Cept1), mRNA.                            |
| scl0228983.14 82-S  | 34.6306 | 1.46  | Osbp12        | NM_144500.1 | Mus musculus oxysterol binding protein-like 2 (Osbp12), mRNA.                                   |
| scl21206.2.1 228-S  | 34.6143 | 1.76  | Bri3          | NM_018772.1 | Mus musculus brain protein I3 (Bri3), mRNA.                                                     |
| scl0170716.1 183-S  | 34.5952 | 1.47  | Cyp4f13       | NM_130882.1 | Mus musculus cytochrome P450, family 4, subfamily 1, polypeptide 13 (Cyp4f13), mRNA.            |
| scl17509.2 142-S    | 34.593  | 1.79  | 9930028C20Rik | NM_178691.2 | Mus musculus RIKEN cDNA 9930028C20 gene (9930028C20Rik), mRNA.                                  |
| scl18683.9.1 140-S  | 34.5667 | 3.74  | Zc3hdc8       | NM_020594.1 | Mus musculus zinc finger CCCH type domain containing 8 (Zc3hdc8), mRNA.                         |
| scl22158.8.1 12-S   | 34.5561 | 2.84  | Exosc8        | NM_027148.2 | Mus musculus exosome component 8 (Exosc8), mRNA.                                                |
| scl49959.3.1 23-S   | 34.5556 | 1.48  | Rpp21         | NM_026308.1 | Mus musculus ribonuclease P 21kDa subunit (human) (Rpp21), mRNA.                                |
| scl27541.6 227-S    | 34.552  | 5.67  | 2310057D15Rik | NM_026421.1 | Mus musculus RIKEN cDNA 2310057D15 gene (2310057D15Rik), mRNA.                                  |
| scl33375.10 5-S     | 34.493  | 1.54  | Vps4a         | NM_126165.1 | Mus musculus vacuolar protein sorting 4a (yeast) (Vps4a), mRNA.                                 |
| scl0067949.2 13-S   | 34.4877 | 1.69  | Mki67ip       | NM_026472.2 | Mus musculus Mki67 (FHA domain) interacting nucleolar phosphoprotein (Mki67ip), mRNA.           |
| scl020182.9 313-S   | 34.4743 | 1.63  | Rxb           | NM_011306.2 | Mus musculus retinoid X receptor beta (Rxb), mRNA.                                              |
| scl43410.8 467-S    | 34.4699 | 1.75  | 1110057K04Rik | NM_172401.2 | Mus musculus RIKEN cDNA 1110057K04 gene (1110057K04Rik), mRNA.                                  |
| scl46866.15 163-S   | 34.3895 | 1.42  | Brd1          | NM_128275.4 | Mus musculus bromodomain containing 1 (Brd1), mRNA.                                             |
| scl0003356.1 0-S    | 34.3833 | 1.83  | Mrps5         | NM_029963.2 | Mus musculus mitochondrial ribosomal protein S5 (Mrps5), mRNA.                                  |
| scl0068349.1 0-S    | 34.3784 | 1.86  | Ndufs3        | NM_130347.1 | Mus musculus NADH dehydrogenase (ubiquinone) Fe-S protein 3 (Ndufs3), mRNA.                     |
| scl40004.19.1 140-S | 34.256  | 1.27  | Acadv1        | NM_017366   | Mus musculus acyl-Coenzyme A dehydrogenase, very long chain (Acadv1), mRNA.                     |
| scl0226026.1 6-S    | 34.1517 | 14.96 | Smc511        | NM_153808.1 | Mus musculus SMC5 structural maintenance of chromosomes 5-like 1 (yeast) (Smc511), mRNA.        |
| scl52451.21 19-S    | 34.1194 | 1.36  | Chuk          | NM_007700.1 | Mus musculus conserved helix-loop-helix ubiquitous kinase (Chuk), mRNA.                         |
| scl0003035.1 7-S    | 34.0751 | 5.3   | Pex16         | NM_145122.1 | Mus musculus peroxisome biogenesis factor 16 (Pex16), mRNA.                                     |
| scl17695.4.1 211-S  | 34.0732 | 2.28  | Neu2          | NM_015750.1 | Mus musculus neuraminidase 2 (Neu2), mRNA.                                                      |
| scl45614.46.1 71-S  | 34.0291 | 8.36  | Tep1          | NM_009351.1 | Mus musculus telomerase associated protein 1 (Tep1), mRNA.                                      |
| scl37341.3.1 8-S    | 33.9979 | 1.36  | Bloc1s1       | NM_015740.2 |                                                                                                 |
| scl00230249.2 159-S | 33.9798 | 1.75  | AI314180      | NM_172381.2 | Mus musculus expressed sequence AI314180 (AI314180), mRNA.                                      |
| scl20979.15 678-S   | 33.971  | 2.62  | Kynu          | NM_027552.1 | Mus musculus kynureninase (L-kynurenine hydrolase) (Kynu), mRNA.                                |
| scl0015982.2 105-S  | 33.9276 | 10.65 | lfrd1         | NM_013562.1 | Mus musculus interferon-related developmental regulator 1 (lfrd1), mRNA.                        |
| scl0098910.2 26-S   | 33.9087 | 2.87  | Usp6nl        | NM_181399.2 |                                                                                                 |
| scl0001909.1 11-S   | 33.9041 | 3.36  | Dscr3         | NM_007834.1 | Mus musculus Down syndrome critical region gene 3 (Dscr3), mRNA.                                |
| scl39882.5 436-S    | 33.8935 | 1.44  | AI316787      | NM_199199.1 | Mus musculus expressed sequence AI316787 (AI316787), mRNA.                                      |
| scl21409.6.1 1-S    | 33.8616 | 2.95  | Dnase2b       | NM_019957.2 | Mus musculus deoxyribonuclease II beta (Dnase2b), mRNA.                                         |
| scl00231464.2 19-S  | 33.8509 | 7.73  | Cnot6l        | NM_144910.1 |                                                                                                 |
| scl45540.5.1 3-S    | 33.7872 | 2.56  | 1500005A01Rik | NM_033146.1 | Mus musculus RIKEN cDNA 1500005A01 gene (1500005A01Rik), mRNA.                                  |
| scl073998.24 21-S   | 33.7828 | 5.14  | Herc3         | NM_028705.2 | Mus musculus hect domain and RLD 3 (Herc3), mRNA.                                               |
| scl47056.10.1 17-S  | 33.7621 | 1.32  | Tsta3         | NM_031201.1 | Mus musculus tissue specific transplantation antigen P35B (Tsta3), mRNA.                        |
| scl000730.1 110-S   | 33.7437 | 5.6   | Gcdh          | NM_008097   | Mus musculus glutaryl-Coenzyme A dehydrogenase (Gcdh), mRNA.                                    |
| scl45393.10 71-S    | 33.7126 | 1.4   | Bnip3l        | NM_009761.2 | Mus musculus BCL2/adenovirus E1B 19kDa-interacting protein 3-like (Bnip3l), mRNA.               |
| scl26144.4 263-S    | 33.696  | 2.08  | Hspb8         | NM_030704.1 | Mus musculus heat shock 27kDa protein 8 (Hspb8), mRNA.                                          |

|                |       |         |       |               |             |                                                                                                  |
|----------------|-------|---------|-------|---------------|-------------|--------------------------------------------------------------------------------------------------|
| scl068066.1    | 115-S | 33.6096 | 1.27  | D11Erd333e    | NM_026542.1 |                                                                                                  |
| scl0067440.1   | 72-S  | 33.6046 | 1.83  | Papd1         | NM_026157.1 | Mus musculus PAP associated domain containing 1 (Papd1), mRNA.                                   |
| scl50565.20    | 286-S | 33.6009 | 1.68  | Man2a1        | NM_008549.1 | Mus musculus mannosidase 2, alpha 1 (Man2a1), mRNA.                                              |
| scl0067993.2   | 43-S  | 33.5909 | 2.47  | Nudt12        | NM_026497.1 | Mus musculus nudix (nucleoside diphosphate linked moiety X)-type motif 12 (Nudt12), mRNA.        |
| scl056485.12   | 106-S | 33.5846 | 13.32 | Slc2a5        | NM_019741.2 | Mus musculus solute carrier family 2 (facilitated glucose transporter), member 5 (Slc2a5), mRNA. |
| scl0011477.2   | 228-S | 33.5527 | 1.56  | Acvr1         | NM_007394.2 | Mus musculus activin A receptor, type 1 (Acvr1), mRNA.                                           |
| scl46515.12.62 | 5-S   | 33.5489 | 13.51 | Actr8         | NM_027493.1 | Mus musculus ARP8 actin-related protein 8 homolog (S. cerevisiae) (Actr8), mRNA.                 |
| scl0068379.1   | 280-S | 33.5391 | 1.52  | Ciz1          | NM_028412.1 | Mus musculus CDKN1A interacting zinc finger protein 1 (Ciz1), mRNA.                              |
| scl016396.2    | 0-S   | 33.4993 | 2.29  | Itch          | XM_192925.3 | Mus musculus itchy (Itch), mRNA.                                                                 |
| scl022142.1    | 236-S | 33.4971 | 11.44 | Tuba1         | NM_011653   | Mus musculus tubulin, alpha 1 (Tuba1), mRNA.                                                     |
| scl016822.21   | 5-S   | 33.4723 | 14.01 | Lcp2          | NM_010696.2 | Mus musculus lymphocyte cytosolic protein 2 (Lcp2), mRNA.                                        |
| scl0268903.1   | 0-S   | 33.3872 | 8.59  | Nrip1         | NM_173440.1 | Mus musculus nuclear receptor interacting protein 1 (Nrip1), mRNA.                               |
| scl00102058.2  | 282-S | 33.3719 | 1.59  | Exoc8         | NM_198103.1 |                                                                                                  |
| scl0094061.1   | 118-S | 33.3613 | 1.53  | Mrpl1         | NM_053158.1 | Mus musculus mitochondrial ribosomal protein L1 (Mrpl1), mRNA.                                   |
| scl065111.1    | 137-S | 33.355  | 1.3   | Dap3          | NM_022994.2 | Mus musculus death associated protein 3 (Dap3), mRNA.                                            |
| scl35262.19    | 0-S   | 33.3101 | 1.36  | 1300006C19Rik | XM_358385.1 |                                                                                                  |
| scl0001050.1   | 29-S  | 33.2668 | 1.6   | Grc2f         | NM_013536.1 | Mus musculus gene rich cluster, C2f gene (Grc2f), mRNA.                                          |
| scl42037.39    | 16-S  | 33.2533 | 1.61  | Cdc42bbp      | NM_183016.1 | Mus musculus Cdc42 binding protein kinase beta (Cdc42bbp), mRNA.                                 |
| scl53337.7     | 252-S | 33.1753 | 19.61 | Keg1          | NM_029550.1 | Mus musculus kidney expressed gene 1 (Keg1), mRNA.                                               |
| scl31320.8.1   | 2-S   | 33.1478 | 1.43  | Csrp3         | NM_013808.3 | Mus musculus cysteine and glycine-rich protein 3 (Csrp3), mRNA.                                  |
| scl24592.15.1  | 12-S  | 33.0746 | 2.86  | AF155546      | NM_021303.1 | Mus musculus cDNA sequence AF155546 (AF155546), mRNA.                                            |
| scl52531.6     | 219-S | 33.0487 | 1.55  | Pank1         | NM_023792.1 | Mus musculus pantothenate kinase 1 (Pank1), mRNA.                                                |
| scl38302.14.1  | 13-S  | 33.0291 | 2.6   | Prim1         | NM_008921.1 | Mus musculus DNA primase, p49 subunit (Prim1), mRNA.                                             |
| scl42371.18.1  | 30-S  | 33.0009 | 1.58  | Pygl          | NM_133198.1 | Mus musculus liver glycogen phosphorylase (Pygl), mRNA.                                          |
| scl072040.1    | 282-S | 32.9928 | 1.49  | Mucdhl        | NM_028069.1 | Mus musculus mucin and cadherin like (Mucdhl), mRNA.                                             |
| scl0030934.2   | 247-S | 32.9859 | 1.56  | Tor1b         | NM_133673.2 | Mus musculus torsin family 1, member B (Tor1b), mRNA.                                            |
| scl00329002.1  | 170-S | 32.9795 | 2.29  | Zfp236        | NM_177832.2 | Mus musculus zinc finger protein 236 (Zfp236), mRNA.                                             |
| scl069583.1    | 127-S | 32.9733 | 1.74  | Tnfsf13       | NM_023517.1 | Mus musculus tumor necrosis factor (ligand) superfamily, member 13 (Tnfsf13), mRNA.              |
| scl067667.2    | 1-S   | 32.9083 | 8.85  | 4930562C03Rik | XM_134612.3 | Mus musculus RIKEN cDNA 4930562C03 gene (4930562C03Rik), mRNA.                                   |
| scl0073046.2   | 136-S | 32.8751 | 1.63  | 2900070E19Rik | NM_028419.1 | Mus musculus RIKEN cDNA 2900070E19 gene (2900070E19Rik), mRNA.                                   |
| scl0002499.1   | 186-S | 32.868  | 1.89  | Fbxo4         | NM_134099   | Mus musculus F-box only protein 4 (Fbxo4), mRNA.                                                 |
| scl49587.9     | 193-S | 32.8567 | 2.92  | Sfrs7         | NM_146083.1 | Mus musculus splicing factor, arginine/serine-rich 7 (Sfrs7), mRNA.                              |
| scl17276.4     | 366-S | 32.8003 | 12.17 | Dpt           | NM_019759.1 | Mus musculus dermatopontin (Dpt), mRNA.                                                          |
| scl30453.23.6  | 9-S   | 32.7724 | 6.79  | Cars          | NM_013742.2 | Mus musculus cysteinyl-tRNA synthetase (Cars), mRNA.                                             |
| scl0001834.1   | 12-S  | 32.7648 | 9.67  | 0610037P05Rik | XM_148359.1 | Mus musculus RIKEN cDNA 0610037P05 gene (0610037P05Rik), mRNA.                                   |
| scl38726.3.1   | 35-S  | 32.7538 | 1.29  | Cstb          | NM_007793.2 | Mus musculus cystatin B (Cstb), mRNA.                                                            |
| scl00320487.1  | 23-S  | 32.7495 | 1.77  | D930036F22Rik | NM_177171.3 | Mus musculus RIKEN cDNA D930036F22 gene (D930036F22Rik), mRNA.                                   |
| scl077619.4    | 0-S   | 32.7459 | 10.12 | C330008K14Rik | XM_128979   |                                                                                                  |
| scl27876.6.1   | 53-S  | 32.6496 | 1.45  | 2810021O14Rik | NM_025480.2 | Mus musculus RIKEN cDNA 2810021O14 gene (2810021O14Rik), mRNA.                                   |
| scl0001537.1   | 132-S | 32.617  | 9.47  | Rtn4          | NM_194054.1 | Mus musculus reticulon 4 (Rtn4), transcript variant 5, mRNA.                                     |
| scl0012846.1   | 253-S | 32.6073 | 1.48  | Comt          | XM_147265.1 | Mus musculus catechol-O-methyltransferase (Comt), mRNA.                                          |
| scl0066870.1   | 13-S  | 32.5976 | 1.43  | 1200009K13Rik | NM_025814.1 | Mus musculus RIKEN cDNA 1200009K13 gene (1200009K13Rik), mRNA.                                   |
| scl0001551.1   | 0-S   | 32.4652 | 9.14  | 4933407N01Rik | NM_025745.2 | Mus musculus RIKEN cDNA 4933407N01 gene (4933407N01Rik), mRNA.                                   |
| scl0227290.1   | 240-S | 32.4607 | 1.27  | Aamp          | NM_146110.1 | Mus musculus angio-associated migratory protein (Aamp), mRNA.                                    |
| scl18197.5     | 22-S  | 32.4122 | 4.63  | Rgs19         | NM_026446.2 | Mus musculus regulator of G-protein signaling 19 (Rgs19), mRNA.                                  |
| scl057321.4    | 17-S  | 32.4064 | 2.73  | Terf2ip       | NM_020584.1 | Mus musculus telomeric repeat binding factor 2, interacting protein (Terf2ip), mRNA.             |
| scl52455.6.1   | 68-S  | 32.4008 | 1.27  | Cpn1          | NM_030703   | Mus musculus carboxypeptidase N, polypeptide 1 (Cpn1), mRNA.                                     |
| scl0017222.2   | 194-S | 32.3918 | 1.53  | Anapc1        | NM_008569.1 | Mus musculus anaphase promoting complex subunit 1 (Anapc1), mRNA.                                |
| scl43413.30    | 169-S | 32.3829 | 1.33  | Apob          | XM_137955.2 | Mus musculus apolipoprotein B (Apob), mRNA.                                                      |
| GI_28476905-S  |       | 32.372  | 1.42  | 3010033P07Rik | NM_133123.4 | Mus musculus RIKEN cDNA 3010033P07 gene (3010033P07Rik), mRNA.                                   |
| scl34581.9.1   | 48-S  | 32.3475 | 1.52  | Gpsn2         | NM_134118.1 | Mus musculus glycoprotein, synaptic 2 (Gpsn2), mRNA.                                             |
| scl0017837.2   | 182-S | 32.3147 | 6.43  | Mug2          | NM_008646.1 | Mus musculus murinoglobulin 2 (Mug2), mRNA.                                                      |
| scl50308.28    | 413-S | 32.2935 | 8.43  | Map3k4        | NM_011948.1 | Mus musculus mitogen activated protein kinase kinase 4 (Map3k4), mRNA.                           |
| scl0012747.1   | 67-S  | 32.2296 | 3.08  | Clk1          | NM_009905.1 |                                                                                                  |
| scl016974.1    | 230-S | 32.221  | 2.59  | Lrp6          | NM_008514.1 | Mus musculus low density lipoprotein receptor-related protein 6 (Lrp6), mRNA.                    |
| scl074410.2    | 34-S  | 32.2146 | 1.95  | 4932702F08Rik | XM_130221.2 | Mus musculus RIKEN cDNA 4932702F08 gene (4932702F08Rik), mRNA.                                   |

|                     |         |       |                 |             |                                                                                                           |
|---------------------|---------|-------|-----------------|-------------|-----------------------------------------------------------------------------------------------------------|
| sci066480.2 3-S     | 32.1934 | 1.27  | Rpl15           | NM_025586.1 | Mus musculus ribosomal protein L15 (Rpl15), mRNA.                                                         |
| sci53392.18 161-S   | 32.1796 | 1.68  | Mta2            | NM_011842.2 | Mus musculus metastasis-associated gene family, member 2 (Mta2), mRNA.                                    |
| sci50824.6.23 33-S  | 32.1711 | 1.77  | H2-Eb1          | NM_010382.1 | Mus musculus histocompatibility 2, class II antigen E beta (H2-Eb1), mRNA.                                |
| sci28480.7 231-S    | 32.1605 | 1.46  | Adipor2         | NM_197985.2 |                                                                                                           |
| sci0014339.2 163-S  | 32.1477 | 9.9   | Fts             | NM_010241.1 | Mus musculus retinoblastoma-like 2 (Rbl2), mRNA.                                                          |
| sci40050.12 410-S   | 32.1282 | 1.32  | Ndel1           | NM_023668.1 | Mus musculus nuclear distribution gene E-like homolog 1 (A. nidulans) (Ndel1), mRNA.                      |
| sci0058909.2 289-S  | 32.0829 | 7.71  | D430015B01Rik   | NM_153574.1 | Mus musculus RIKEN cDNA D430015B01 gene (D430015B01Rik), mRNA.                                            |
| sci0002625.1 41-S   | 32.0308 | 2.08  | 2210012G02Rik   | NM_025617.1 | Mus musculus RIKEN cDNA 2210012G02 gene (2210012G02Rik), mRNA.                                            |
| sci0070834.1 254-S  | 32.0237 | 2.86  | Spag9           | NM_027569.1 | Mus musculus sperm associated antigen 9 (Spag9), mRNA.                                                    |
| sci22128.3 229-S    | 32.0061 | 2.31  | Slah2           | NM_009174.2 | Mus musculus seven in absentia 2 (Slah2), mRNA.                                                           |
| sci0003304.1 37-S   | 31.9961 | 2.72  | Xrn2            | NM_011917   | Mus musculus 5-3 exoribonuclease 2 (Xrn2), mRNA.                                                          |
| sci39223.3.102 51-S | 31.9035 | 1.32  | Dcxr            | NM_026428.1 | Mus musculus dicarbonyl L-xylulose reductase (Dcxr), mRNA.                                                |
| sci0020928.2 272-S  | 31.8843 | 12.64 | Abcc9           | NM_011511.1 | Mus musculus ATP-binding cassette, sub-family C (CFTR/MRP), member 9 (Abcc9), transcript variant 1, mRNA. |
| sci32844.9.1 17-S   | 31.8497 | 1.46  | 9430029K10Rik   | XM_284281.2 | Mus musculus RIKEN cDNA 9430029K10 gene (9430029K10Rik), mRNA.                                            |
| sci29898.5 140-S    | 31.8431 | 1.59  | Vps24           | NM_025783.2 | Mus musculus vacuolar protein sorting 24 (yeast) (Vps24), mRNA.                                           |
| sci19403.42.1 262-S | 31.8341 | 1.56  | Hc              | NM_010406.1 | Mus musculus hemolytic complement (Hc), mRNA.                                                             |
| sci32203.4.1 10-S   | 31.7815 | 11.56 | ICRFP703B1614Q5 | NM_020616.1 | Mus musculus predicted gene ICRFP703B1614Q5.6 (ICRFP703B1614Q5.6), mRNA.                                  |
| sci019122.2 199-S   | 31.775  | 1.43  | Prnp            | NM_011170.1 | Mus musculus prion protein (Prnp), mRNA.                                                                  |
| sci34795.4.1 9-S    | 31.7653 | 1.53  | Sap30           | NM_021788.1 | Mus musculus sin3 associated polypeptide (Sap30), mRNA.                                                   |
| sci0234267.8 19-S   | 31.7623 | 2.97  | Gpm6a           | NM_153581.2 | Mus musculus glycoprotein m6a (Gpm6a), mRNA.                                                              |
| sci383030.6.1 17-S  | 31.7551 | 2.3   | 2410016F19Rik   | NM_026113.2 | Mus musculus RIKEN cDNA 2410016F19 gene (2410016F19Rik), mRNA.                                            |
| sci067374.11 26-S   | 31.7175 | 9.11  | Jam2            | NM_023844.2 | Mus musculus junction adhesion molecule 2 (Jam2), mRNA.                                                   |
| sci013423.1 7-S     | 31.6953 | 2.16  | Dnase2a         | NM_010062   | Mus musculus deoxyribonuclease II alpha (Dnase2a), mRNA.                                                  |
| sci27052.5.1 64-S   | 31.6902 | 1.5   | Nudt1           | NM_008637.1 | Mus musculus nudix (nucleoside diphosphate linked moiety X)-type motif 1 (Nudt1), mRNA.                   |
| sci073327.1 204-S   | 31.6833 | 2.48  | 1700040I03Rik   | XM_132652.1 | Mus musculus RIKEN cDNA 1700040I03 gene (1700040I03Rik), mRNA.                                            |
| sci18985.4 291-S    | 31.6259 | 1.37  | Slc35c1         | NM_145832.2 |                                                                                                           |
| sci0071766.1 324-S  | 31.6217 | 12.18 | 1300006N24Rik   | NM_027911.2 | Mus musculus RIKEN cDNA 1300006N24 gene (1300006N24Rik), mRNA.                                            |
| sci00110323.1 173-S | 31.5825 | 1.32  | Cox6b           | NM_025628.1 | Mus musculus cytochrome c oxidase, subunit VIb (Cox6b), mRNA.                                             |
| sci26367.12.1 1-S   | 31.5769 | 1.38  | Scarb2          | NM_007644.2 | Mus musculus scavenger receptor class B, member 2 (Scarb2), mRNA.                                         |
| sci0268449.4 2-S    | 31.4922 | 1.31  | Rpl23a          | NM_207523   |                                                                                                           |
| sci38242.7.1 214-S  | 31.4915 | 2.69  | Mtrf11          | NM_175374.2 |                                                                                                           |
| sci0070579.1 22-S   | 31.4664 | 3.49  | 5730454B08Rik   | NM_144530.3 | Mus musculus RIKEN cDNA 5730454B08 gene (5730454B08Rik), mRNA.                                            |
| sci0066125.2 261-S  | 31.4276 | 1.35  | Sf3b5           | NM_175102.2 |                                                                                                           |
| sci019821.1 18-S    | 31.349  | 8.58  | Rnf2            | NM_011277.1 | Mus musculus ring finger protein 2 (Rnf2), mRNA.                                                          |
| sci9369.1.1 297-S   | 31.2447 | 2.37  | Olf713          | NM_147034.1 | Mus musculus olfactory receptor 713 (Olf713), mRNA.                                                       |
| sci49271.23.1 11-S  | 31.2384 | 8.9   | Opa1            | NM_133752   | Mus musculus optic atrophy 1 homolog (human) (Opa1), mRNA.                                                |
| sci00242521.1 200-S | 31.2122 | 1.95  | C530050O22Rik   | NM_172871.1 | Mus musculus RIKEN cDNA C530050O22 gene (C530050O22Rik), mRNA.                                            |
| sci012370.8 14-S    | 31.2095 | 1.52  | Casp8           | NM_009812.1 | Mus musculus caspase 8 (Casp8), mRNA.                                                                     |
| sci25953.10 428-S   | 31.2015 | 2.04  | Wbscr16         | NM_033572.1 | Mus musculus Williams-Beuren syndrome chromosome region 16 homolog (human) (Wbscr16), mRNA.               |
| sci0014082.2 318-S  | 31.1864 | 1.54  | Fadd            | NM_010175.2 | Mus musculus Fas (TNFRSF6)-associated via death domain (Fadd), mRNA.                                      |
| sci18441.3.11 50-S  | 31.1806 | 1.32  | Scand1          | NM_020255.1 | Mus musculus SCAN domain-containing 1 (Scand1), mRNA.                                                     |
| sci066094.3 4-S     | 31.1685 | 1.63  | Lsm7            | NM_025349.1 | Mus musculus LSM7 homolog, U6 small nuclear RNA associated (S. cerevisiae) (Lsm7), mRNA.                  |
| sci0002868.1 92-S   | 31.1154 | 1.27  | MApp19          | XM_358353.1 |                                                                                                           |
| sci066522.1 109-S   | 31.0544 | 1.53  | Pgpep1          | NM_023217.2 |                                                                                                           |
| sci52445.7 23-S     | 31.0478 | 2.62  | Scd1            | NM_009127.2 | Mus musculus stearoyl-Coenzyme A desaturase 1 (Scd1), mRNA.                                               |
| sci0228019.1 0-S    | 31.0173 | 2.21  | BC004636        | NM_145524.1 | Mus musculus cDNA sequence BC004636 (BC004636), mRNA.                                                     |
| sci0002324.1 12-S   | 31.0156 | 2.16  | Synj2bp         | NM_025292.2 | Mus musculus synaptotagmin 2 binding protein (Synj2bp), mRNA.                                             |
| sci054644.12 28-S   | 31.0138 | 1.66  | DXImx46e        | NM_138604.2 | Mus musculus DNA segment, Chr X, Immunex 46, expressed (DXImx46e), mRNA.                                  |
| sci068092.4 14-S    | 30.9807 | 2.24  | Ncbp2           | NM_026554.2 | Mus musculus nuclear cap binding protein subunit 2 (Ncbp2), mRNA.                                         |
| sci28701.8.1 115-S  | 30.9724 | 1.77  | 0710001P09Rik   | NM_025351.2 | Mus musculus RIKEN cDNA 0710001P09 gene (0710001P09Rik), mRNA.                                            |
| sci0017938.1 31-S   | 30.9443 | 1.71  | Naca            | NM_013608.2 | Mus musculus nascent polypeptide-associated complex alpha polypeptide (Naca), mRNA.                       |
| sci067680.5 8-S     | 30.8495 | 1.9   | Sdnh            | NM_023374.3 | Mus musculus succinate dehydrogenase complex, subunit B, iron sulfur (Ips) (Sdnh), mRNA.                  |
| sci36350.20 250-S   | 30.8486 | 2.46  | Xylb            | XM_135223.2 |                                                                                                           |
| sci20428.3.1 133-S  | 30.8197 | 1.36  | 2010323F13Rik   | NM_177157.2 |                                                                                                           |
| sci018226.2 9-S     | 30.7901 | 2.47  | Nup62           | NM_053074.1 | Mus musculus nucleoporin 62 (Nup62), mRNA.                                                                |
| sci067956.13 1-S    | 30.7431 | 2.98  | 2410195B05Rik   | NM_030241.2 | Mus musculus RIKEN cDNA 2410195B05 gene (2410195B05Rik), mRNA.                                            |

|                |       |         |       |               |             |                                                                                                                               |
|----------------|-------|---------|-------|---------------|-------------|-------------------------------------------------------------------------------------------------------------------------------|
| scl0075292.1   | 77-S  | 30.7089 | 1.94  | Prkcn         | NM_029239.2 | Mus musculus protein kinase C, nu (Prkcn), mRNA.                                                                              |
| scl23193.10.1  | 8-S   | 30.6973 | 1.27  | Alg5          | NM_025442.1 | Mus musculus asparagine-linked glycosylation 5 homolog (yeast, dolichyl-phosphate beta-glucosyltransferase) (Alg5), mRNA.     |
| scl0170718.1   | 224-S | 30.6415 | 1.78  | Idh3b         | NM_130884.1 | Mus musculus isocitrate dehydrogenase 3 (NAD+) beta (Idh3b), mRNA.                                                            |
| scl000950.1    | 13-S  | 30.6273 | 1.36  | Cyp27a1       | NM_024264.3 | Mus musculus cytochrome P450, family 27, subfamily a, polypeptide 1 (Cyp27a1), mRNA.                                          |
| scl0056490.1   | 199-S | 30.5748 | 1.65  | Zfp288        | XM_147215.1 |                                                                                                                               |
| scl35222.4     | 425-S | 30.5333 | 3.83  | Myd88         | NM_010851   | Mus musculus myeloid differentiation primary response gene 88 (Myd88), mRNA.                                                  |
| scl016000.2    | 30-S  | 30.4979 | 1.26  | Igf1          | NM_010512.2 | Mus musculus insulin-like growth factor 1 (Igf1), mRNA.                                                                       |
| scl024135.1    | 208-S | 30.4126 | 2.41  | Zfp68         | NM_013844.1 | Mus musculus zinc finger protein 68 (Zfp68), mRNA.                                                                            |
| scl0099311.1   | 306-S | 30.3971 | 1.54  | Commd7        | NM_133850.1 | Mus musculus COMM domain containing 7 (Commd7), mRNA.                                                                         |
| scl26912.28.1  | 161-S | 30.3848 | 1.4   | Abcb4         | NM_008830.1 | Mus musculus ATP-binding cassette, sub-family B (MDR/TAP), member 4 (Abcb4), mRNA.                                            |
| scl22977.3.91  | 193-S | 30.379  | 1.44  | Dpm3          | XM_130951.1 | Mus musculus dolichyl-phosphate mannosyltransferase polypeptide 3 (Dpm3), mRNA.                                               |
| scl0021969.2   | 45-S  | 30.3397 | 2.97  | Top1          | NM_009408.1 | Mus musculus topoisomerase (DNA) I (Top1), mRNA.                                                                              |
| scl0059308.2   | 162-S | 30.3284 | 1.77  | Emcn          | NM_016885.1 | Mus musculus endomucin (Emcn), mRNA.                                                                                          |
| scl26859.18.1  | 18-S  | 30.3037 | 3.73  | Ptpn12        | NM_011203.2 | Mus musculus protein tyrosine phosphatase, non-receptor type 12 (Ptpn12), mRNA.                                               |
| scl000226.1    | 3-S   | 30.2994 | 1.68  | Mpl48         | NM_026971.2 | Mus musculus mitochondrial ribosomal protein L48 (Mpl48), transcript variant 2, mRNA.                                         |
| scl39638.4.1   | 92-S  | 30.284  | 1.34  | Rpl23         | NM_022891.1 | Mus musculus ribosomal protein L23 (Rpl23), mRNA.                                                                             |
| scl37892.17.17 | 22-S  | 30.2046 | 1.35  | Ddx50         | NM_053183.1 | Mus musculus DEAD (Asp-Glu-Ala-Asp) box polypeptide 50 (Ddx50), mRNA.                                                         |
| scl28496.23.1  | 78-S  | 30.1985 | 2.16  | Bms11         | NM_194339.1 | Mus musculus BMS1-like, ribosome assembly protein (yeast) (Bms11), mRNA.                                                      |
| scl00319192.1  | 1-S   | 30.1872 | 1.73  | Hist2h2aa2    | NM_178212   | Mus musculus histone 2, H2aa2 (Hist2h2aa2), mRNA.                                                                             |
| scl0003620.1   | 13-S  | 30.1543 | 2.37  | Slc17a3       | NM_134069.2 | Mus musculus solute carrier family 17 (sodium phosphate), member 3 (Slc17a3), mRNA.                                           |
| scl00235574.1  | 8-S   | 30.0647 | 3.87  | Atp2c1        | NM_175025.2 | Mus musculus ATPase, Ca++-sequestering (Atp2c1), mRNA.                                                                        |
| scl38688.8.1   | 12-S  | 29.9476 | 1.54  | Ndufs7        | NM_029272.1 | Mus musculus NADH dehydrogenase (ubiquinone) Fe-S protein 7 (Ndufs7), mRNA.                                                   |
| scl38511.3.1   | 54-S  | 29.9473 | 2.65  | Dcn           | NM_007833.1 | Mus musculus decorin (Dcn), mRNA.                                                                                             |
| scl33425.15    | 229-S | 29.9326 | 1.28  | D230025D16Rik | NM_145604.1 |                                                                                                                               |
| scl36607.9.1   | 1-S   | 29.9296 | 8.38  | Pcolce2       | NM_029620.1 | Mus musculus procollagen C-endopeptidase enhancer 2 (Pcolce2), mRNA.                                                          |
| scl023880.13   | 4-S   | 29.9003 | 4.14  | Fyb           | NM_011815.1 | Mus musculus FYN binding protein (Fyb), mRNA.                                                                                 |
| scl0019299.2   | 231-S | 29.8894 | 1.44  | Abcd3         | NM_008991.1 | Mus musculus ATP-binding cassette, sub-family D (ALD), member 3 (Abcd3), mRNA.                                                |
| scl0001612.1   | 9-S   | 29.8604 | 1.9   | Angptl4       | NM_020581   | Mus musculus angiopoietin-like 4 (Angptl4), mRNA.                                                                             |
| scl00230596.1  | 294-S | 29.7776 | 9.78  | 2410002M20Rik | NM_172897.1 | Mus musculus RIKEN cDNA 2410002M20 gene (2410002M20Rik), mRNA.                                                                |
| scl073736.7    | 23-S  | 29.694  | 1.3   | 1110008B24Rik | XM_177016.2 | Mus musculus RIKEN cDNA 1110008B24 gene (1110008B24Rik), mRNA.                                                                |
| scl41798.24    | 462-S | 29.6896 | 1.31  | Vps54         | NM_139061.2 | Mus musculus vacuolar protein sorting 54 (yeast) (Vps54), mRNA.                                                               |
| scl28242.17.1  | 49-S  | 29.6866 | 10.24 | Gys2          | NM_145572.1 | Mus musculus glycogen synthase 2 (Gys2), mRNA.                                                                                |
| scl0072020.1   | 140-S | 29.6854 | 1.73  | 1600021C16Rik | NM_028059.1 | Mus musculus RIKEN cDNA 1600021C16 gene (1600021C16Rik), mRNA.                                                                |
| scl22501.2     | 29-S  | 29.6636 | 1.71  | 39340         | NM_053102   | Mus musculus selenoprotein (Sep15), mRNA.                                                                                     |
| scl30672.9.1   | 29-S  | 29.633  | 1.4   | Ppp4c         | NM_019674.2 | Mus musculus protein phosphatase 4, catalytic subunit (Ppp4c), mRNA.                                                          |
| scl22226.9.1   | 81-S  | 29.5599 | 1.42  | Nudt6         | NM_153561.1 | Mus musculus nudix (nucleoside diphosphate linked moiety X)-type motif 6 (Nudt6), mRNA.                                       |
| scl0067239.2   | 94-S  | 29.5394 | 7.47  | Bxdc1         | NM_023323.2 | Mus musculus brix domain containing 1 (Bxdc1), mRNA.                                                                          |
| scl0026554.2   | 150-S | 29.5195 | 1.27  | Cul3          | NM_016716.2 | Mus musculus cullin 3 (Cul3), mRNA.                                                                                           |
| scl0003077.1   | 12-S  | 29.502  | 7.47  | Raly          | NM_023130.1 | Mus musculus hnRNP-associated with lethal yellow (Raly), mRNA.                                                                |
| scl012367.6    | 5-S   | 29.4802 | 2.2   | Casp3         | NM_009810.1 | Mus musculus caspase 3, apoptosis related cysteine protease (Casp3), mRNA.                                                    |
| scl0003604.1   | 30-S  | 29.4768 | 1.38  | Efta          | NM_145615.2 | Mus musculus electron transferring flavoprotein, alpha polypeptide (Efta), nuclear gene encoding mitochondrial protein, mRNA. |
| scl22846.10    | 380-S | 29.4714 | 2.15  | Fmo5          | NM_010232.3 | Mus musculus flavin containing monooxygenase 5 (Fmo5), mRNA.                                                                  |
| scl0065257.2   | 56-S  | 29.4593 | 1.79  | Asb3          | NM_023906.2 | Mus musculus ankyrin repeat and SOCS box-containing protein 3 (Asb3), mRNA.                                                   |
| scl0002198.1   | 20-S  | 29.4001 | 1.44  | Acaa2         | NM_177470.2 | Mus musculus acetyl-Coenzyme A acyltransferase 2 (mitochondrial 3-oxoacyl-Coenzyme A thiolase) (Acaa2), mRNA.                 |
| scl020610.4    | 145-S | 29.373  | 1.56  | Sumo3         | NM_019929   |                                                                                                                               |
| scl066310.2    | 4-S   | 29.3146 | 1.36  | 2810410M20Rik | NM_024428   | Mus musculus RIKEN cDNA 2810410M20 gene (2810410M20Rik), mRNA.                                                                |
| scl38368.11    | 94-S  | 29.2995 | 6.83  | Wif1          | NM_011915.1 | Mus musculus Wnt inhibitory factor 1 (Wif1), mRNA.                                                                            |
| scl43736.6     | 95-S  | 29.2553 | 2.2   | Nr2f1         | NM_010151.1 | Mus musculus nuclear receptor subfamily 2, group F, member 1 (Nr2f1), mRNA.                                                   |
| scl34490.14.1  | 30-S  | 29.2211 | 1.79  | Ces3          | NM_053200.1 | Mus musculus carboxylesterase 3 (Ces3), mRNA.                                                                                 |
| scl026425.12   | 5-S   | 29.1885 | 1.28  | Nubp1         | NM_011955.1 | Mus musculus nucleotide binding protein 1 (Nubp1), mRNA.                                                                      |
| scl0001433.1   | 54-S  | 29.1749 | 1.62  | Psmc5         | NM_008950.1 | Mus musculus protease (prosome, macropain) 26S subunit, ATPase 5 (Psmc5), mRNA.                                               |
| scl33976.4     | 321-S | 29.1741 | 1.57  | 2410018G23Rik | NM_027194.1 | Mus musculus RIKEN cDNA 2410018G23 gene (2410018G23Rik), mRNA.                                                                |
| scl32211.7.1   | 6-S   | 29.1416 | 1.27  | Eif3s5        | NM_025344   | Mus musculus eukaryotic translation initiation factor 3, subunit 5 (epsilon) (Eif3s5), mRNA.                                  |
| scl25917.6     | 37-S  | 29.1281 | 1.32  | Ywhag         | NM_018871.2 | Mus musculus 3-monooxygenase/tryptophan 5-monooxygenase activation protein, gamma polypeptide (Ywhag), mRNA.                  |
| scl019179.9    | 9-S   | 29.1176 | 1.67  | Psmc1         | NM_008947   | Mus musculus protease (prosome, macropain) 26S subunit, ATPase 1 (Psmc1), mRNA.                                               |
| scl40755.5.1   | 55-S  | 29.1173 | 1.93  | D11Wsu47e     | NM_177777.3 | Mus musculus DNA segment, Chr 11, Wayne State University 47, expressed (D11Wsu47e), mRNA.                                     |

|                     |         |       |               |             |                                                                                                             |
|---------------------|---------|-------|---------------|-------------|-------------------------------------------------------------------------------------------------------------|
| sci52208.4.1 8-S    | 29.1076 | 2.29  | Rnf125        | NM 026301.1 | Mus musculus ring finger protein 125 (Rnf125), mRNA.                                                        |
| sci0002467.1 77-S   | 29.0862 | 1.81  | Bzrp          | NM 009775.2 | Mus musculus benzodiazepine receptor, peripheral (Bzrp), mRNA.                                              |
| sci38548.13.242 0-S | 29.0557 | 4.09  | Lta4h         | NM 008517.1 | Mus musculus leukotriene A4 hydrolase (Lta4h), mRNA.                                                        |
| sci026441.8 13-S    | 29.055  | 1.29  | Pasma4        | NM 011966   | Mus musculus proteasome (prosome, macropain) subunit, alpha type 4 (Pasma4), mRNA.                          |
| sci054610.1 1-S     | 29.0544 | 24.27 | Tbc1d8        | NM 018775.1 | Mus musculus TBC1 domain family, member 8 (Tbc1d8), mRNA.                                                   |
| sci52843.9.1 76-S   | 29.0147 | 3.14  | Efemp2        | NM 021474.2 | Mus musculus epidermal growth factor-containing fibulin-like extracellular matrix protein 2 (Efemp2), mRNA. |
| sci077044.6 17-S    | 29.0066 | 1.54  | Arid2         | NM 175251   | Mus musculus AT rich interactive domain 2 (Arid-rfx like) (Arid2), mRNA.                                    |
| sci076073.9 113-S   | 28.9837 | 1.46  | O610009F02Rik | NM 029508.1 |                                                                                                             |
| sci40883.5 194-S    | 28.9573 | 1.96  | G6pc          | NM 008061.2 | Mus musculus glucose-6-phosphatase, catalytic (G6pc), mRNA.                                                 |
| sci0225912.8 241-S  | 28.9215 | 1.46  | BC065078      | NM 201351.1 | Mus musculus cDNA sequence BC065078 (BC065078), mRNA.                                                       |
| sci0319160.1 25-S   | 28.9112 | 3.35  | Hist1h4k      | NM 178211.1 | Mus musculus histone 1, H4k (Hist1h4k), mRNA.                                                               |
| sci40890.2 6-S      | 28.8681 | 1.75  | Ramp2         | NM 019444.1 | Mus musculus receptor (calcitonin) activity modifying protein 2 (Ramp2), mRNA.                              |
| sci056448.1 20-S    | 28.8648 | 1.36  | Cyp2d22       | NM 019823.2 | Mus musculus cytochrome P450, family 2, subfamily d, polypeptide 22 (Cyp2d22), mRNA.                        |
| sci0319187.1 0-S    | 28.8199 | 1.56  | Hist1h2bn     | NM 178201.1 | Mus musculus histone 1, H2bn (Hist1h2bn), mRNA.                                                             |
| sci44183.10.1 0-S   | 28.8015 | 1.42  | Alhd5a1       | NM 172532.1 |                                                                                                             |
| sci0003640.1 4-S    | 28.7423 | 1.69  | Ptcd2         | XM 127497.2 |                                                                                                             |
| sci056397.1 158-S   | 28.7422 | 1.49  | Morf4l2       | NM 019768.2 | Mus musculus mortality factor 4 like 2 (Morf4l2), mRNA.                                                     |
| sci27165.9 379-S    | 28.7269 | 1.69  | Rabgef1       | NM 019983.2 | Mus musculus RAB guanine nucleotide exchange factor (GEF) 1 (Rabgef1), mRNA.                                |
| sci0003552.1 55-S   | 28.7024 | 7.47  | Syncrip       | NM 019796.2 | Mus musculus synaptotagmin binding, cytoplasmic RNA interacting protein (Syncrip), mRNA.                    |
| sci0209200.1 109-S  | 28.6884 | 1.42  | BC023741      | XM 148582.3 | Mus musculus cDNA sequence BC023741 (BC023741), mRNA.                                                       |
| sci000210.1 44-S    | 28.6521 | 5.41  | Eif4g2        | NM 013507.2 | Mus musculus eukaryotic translation initiation factor 4, gamma 2 (Eif4g2), mRNA.                            |
| sci30948.10 348-S   | 28.6286 | 1.69  | AI849286      | XM 194372.3 | Mus musculus expressed sequence AI849286 (AI849286), mRNA.                                                  |
| sci00227743.1 265-S | 28.5615 | 1.3   | Mapkap1       | NM 177345.2 | Mus musculus mitogen-activated protein kinase associated protein 1 (Mapkap1), mRNA.                         |
| sci00109113.1 250-S | 28.5486 | 1.46  | Uhrf2         | NM 144873.1 | Mus musculus ubiquitin-like, containing PHD and RING finger domains 2 (Uhrf2), mRNA.                        |
| sci015441.12 277-S  | 28.5331 | 1.28  | Hp1bp3        | NM 010470.1 | Mus musculus heterochromatin protein 1, binding protein 3 (Hp1bp3), mRNA.                                   |
| sci0076740.1 108-S  | 28.5288 | 1.47  | C920006C10Rik | NM 133766.1 | Mus musculus RIKEN cDNA C920006C10 gene (C920006C10Rik), mRNA.                                              |
| sci37776.6 58-S     | 28.5229 | 1.28  | D10Jhu81e     | NM 138601.1 | Mus musculus DNA segment, Chr 10, Johns Hopkins University 81 expressed (D10Jhu81e), mRNA.                  |
| sci0110279.7 217-S  | 28.499  | 2.91  | Bcr           | XM 125706.5 | Mus musculus breakpoint cluster region homolog (Bcr), mRNA.                                                 |
| sci52628.17.1 63-S  | 28.472  | 1.82  | BC018472      | NM 146097.1 | Mus musculus cDNA sequence BC018472 (BC018472), mRNA.                                                       |
| sci26392.12.1 51-S  | 28.4465 | 11.4  | Rassf6        | XM 132163.4 | Mus musculus Ras association (RalGDS/AF-6) domain family 6 (Rassf6), mRNA.                                  |
| sci069276.9 236-S   | 28.422  | 6.89  | Tloc1         | NM 027016.1 | Mus musculus translocation protein 1 (Tloc1), mRNA.                                                         |
| sci0070396.1 30-S   | 28.4158 | 9.59  | 2210409M21Rik | NM 133728.2 | Mus musculus RIKEN cDNA 2210409M21 gene (2210409M21Rik), mRNA.                                              |
| sci40333.9 365-S    | 28.4069 | 2.92  | Mat2b         | NM 134017.1 | Mus musculus methionine adenosyltransferase II, beta (Mat2b), mRNA.                                         |
| sci0003709.1 47-S   | 28.3808 | 1.88  | Tbc1d7        | NM 025935.1 | Mus musculus TBC1 domain family, member 7 (Tbc1d7), mRNA.                                                   |
| sci00105935.2 195-S | 28.3703 | 4.06  | AI987712      | NM 178921.2 | Mus musculus expressed sequence AI987712 (AI987712), mRNA.                                                  |
| sci075758.2 4-S     | 28.3123 | 8.64  | 9130401M01Rik | NM 029418.2 | Mus musculus RIKEN cDNA 9130401M01 gene (9130401M01Rik), mRNA.                                              |
| sci0026932.2 213-S  | 28.2669 | 1.61  | Ppp2r5e       | NM 012024.1 | Mus musculus protein phosphatase 2, regulatory subunit B (B56), epsilon isoform (Ppp2r5e), mRNA.            |
| sci44789.4.1 0-S    | 28.2207 | 12.77 | Omd           | NM 012050.1 | Mus musculus osteomodulin (Omd), mRNA.                                                                      |
| sci000078.1 211-S   | 28.2197 | 2.96  | Epn2          | NM 010148.1 | Mus musculus epsin 2 (Epn2), mRNA.                                                                          |
| sci22994.6 49-S     | 28.2159 | 1.26  | Ssr2          | NM 025448.2 | Mus musculus signal sequence receptor, beta (Ssr2), mRNA.                                                   |
| sci0050908.1 128-S  | 28.1894 | 1.75  | C1s           | NM 144938.1 | Mus musculus complement component 1, s subcomponent (C1s), mRNA.                                            |
| sci16401.2 136-S    | 28.1403 | 1.86  | 9330132E09Rik | XM 283635.2 | Mus musculus RIKEN cDNA 9330132E09 gene (9330132E09Rik), mRNA.                                              |
| sci0108927.4 201-S  | 28.1302 | 2.61  | 2810489O06Rik | NM 175386.3 | Mus musculus RIKEN cDNA 2810489O06 gene (2810489O06Rik), mRNA.                                              |
| sci0003826.1 18-S   | 28.1219 | 2.23  | Ilvb1         | NM 173751.3 | Mus musculus ilvB (bacterial acetolactate synthase)-like (Ilvb1), mRNA.                                     |
| sci25892.5.96 2-S   | 28.0849 | 2.36  | Ap1s1         | NM 007457.1 | Mus musculus adaptor protein complex AP-1, sigma 1 (Ap1s1), mRNA.                                           |
| sci15913.2.1 30-S   | 28.0491 | 5.38  | Apcs          | NM 011318.1 | Mus musculus serum amyloid P-component (Apcs), mRNA.                                                        |
| sci20333.19.1 3-S   | 28.0409 | 1.39  | Usp8          | NM 019729.2 | Mus musculus ubiquitin specific protease 8 (Usp8), mRNA.                                                    |
| sci43387.27.1 23-S  | 28.0254 | 3.75  | Smc61         | NM 025695.2 | Mus musculus SMC6 structural maintenance of chromosomes 6-like 1 (yeast) (Smc61), mRNA.                     |
| sci34868.15.1 160-S | 28      | 1.62  | F11           | NM 028066.1 | Mus musculus coagulation factor XI (F11), mRNA.                                                             |
| sci0019043.2 303-S  | 27.9896 | 1.25  | Ppm1b         | NM 011151.1 | Mus musculus protein phosphatase 1B, magnesium dependent, beta isoform (Ppm1b), mRNA.                       |
| sci51764.24.1 222-S | 27.9753 | 1.39  | 4933427L07Rik | NM 027727.1 | Mus musculus RIKEN cDNA 4933427L07 gene (4933427L07Rik), mRNA.                                              |
| sci22366.7.1 2-S    | 27.9344 | 3.49  | Cyp7b1        | NM 007825.1 | Mus musculus cytochrome P450, family 7, subfamily b, polypeptide 1 (Cyp7b1), mRNA.                          |
| sci47751.3.4 1-S    | 27.9065 | 1.41  | 1810060D16Rik | XM 128110.3 | Mus musculus RIKEN cDNA 1810060D16 gene (1810060D16Rik), mRNA.                                              |
| sci069612.1 312-S   | 27.9051 | 8.56  | 2310037I24Rik | NM 133714.2 | Mus musculus RIKEN cDNA 2310037I24 gene (2310037I24Rik), mRNA.                                              |
| sci00192195.1 183-S | 27.9036 | 1.65  | Ash1          | NM 138679.2 | Mus musculus ash1 (absent, small, or homeotic)-like (Drosophila) (Ash1), mRNA.                              |
| sci35191.1.7 235-S  | 27.8995 | 1.92  | Cyp8b1        | NM 010012.2 | Mus musculus cytochrome P450, family 8, subfamily b, polypeptide 1 (Cyp8b1), mRNA.                          |



|                 |       |         |       |               |             |                                                                                                                                 |
|-----------------|-------|---------|-------|---------------|-------------|---------------------------------------------------------------------------------------------------------------------------------|
| sc1012406.1     | 153-S | 27.8994 | 1.96  | Serpinh1      | NM_009825   | Mus musculus serine (or cysteine) proteinase inhibitor, clade H, member 1 (Serpinh1), mRNA.                                     |
| sc100212307.2   | 257-S | 27.7877 | 1.71  | Mapre2        | NM_153058.2 | Mus musculus microtubule-associated protein, RP/EB family, member 2 (Mapre2), mRNA.                                             |
| sc1013085.8     | 30-S  | 27.7871 | 1.87  | Cyp2a12       | NM_133657   | Mus musculus cytochrome P450, family 2, subfamily a, polypeptide 12 (Cyp2a12), mRNA.                                            |
| sc10019088.2    | 125-S | 27.7622 | 2.98  | Prkar2b       | NM_011158.2 | Mus musculus protein kinase, cAMP dependent regulatory, type II beta (Prkar2b), mRNA.                                           |
| sc100394433.1   | 10-S  | 27.737  | 1.54  | Ugt1a2        | NM_013701.1 |                                                                                                                                 |
| sc1076784.15    | 0-S   | 27.7242 | 5.43  | Mtif2         | NM_133767.1 | Mus musculus mitochondrial translational initiation factor 2 (Mtif2), mRNA.                                                     |
| sc136159.7.1    | 126-S | 27.7211 | 1.66  | Angptl6       | NM_145154   | Mus musculus angiopoietin-like 6 (Angptl6), mRNA.                                                                               |
| sc129389.16     | 66-S  | 27.7183 | 1.3   | Slco1b2       | NM_178235.1 | Mus musculus solute carrier organic anion transporter family, member 1b2 (Slco1b2), transcript variant 1, mRNA.                 |
| sc100319263.2   | 23-S  | 27.6443 | 1.59  | A030012M09Rik | NM_183028.1 | Mus musculus RIKEN cDNA A030012M09 gene (A030012M09Rik), mRNA.                                                                  |
| sc125801.8      | 88-S  | 27.6337 | 1.58  | Rac1          | NM_009007.1 | Mus musculus RAS-related G3 botulinum substrate 1 (Rac1), mRNA.                                                                 |
| sc130177.14.1   | 175-S | 27.6278 | 4.66  | Tbxas1        | NM_011539.2 | Mus musculus thromboxane A synthase 1, platelet (Tbxas1), mRNA.                                                                 |
| sc10026895.1    | 34-S  | 27.6212 | 1.66  | Cops7b        | NM_172974.1 | Mus musculus COP9 (constitutive photomorphogenic) homolog, subunit 7b (Arabidopsis thaliana) (Cops7b), mRNA.                    |
| sc134841.3      | 211-S | 27.5936 | 2.84  | 492151116Rik  | NM_172407.1 | Mus musculus RIKEN cDNA 492151116 gene (492151116Rik), mRNA.                                                                    |
| sc100232341.1   | 311-S | 27.5774 | 1.36  | Prkwnk1       | NM_198703.1 | Mus musculus protein kinase, lysine deficient 1 (Prkwnk1), mRNA.                                                                |
| sc118812.14.127 | 2-S   | 27.5539 | 1.7   | 1200015F23Rik | XM_203936.3 | Mus musculus RIKEN cDNA 1200015F23 gene (1200015F23Rik), mRNA.                                                                  |
| sc1083962.1     | 77-S  | 27.5482 | 1.54  | Btbd1         | NM_146193   | Mus musculus BTB (POZ) domain containing 1 (Btbd1), mRNA.                                                                       |
| sc10002682.1    | 0-S   | 27.5468 | 9.84  | Dio1          | NM_007860   | Mus musculus deiodinase, iodothyronine, type I (Dio1), mRNA.                                                                    |
| sc147811.2      | 529-S | 27.534  | 1.47  | 2610029D06Rik | NM_030199.2 |                                                                                                                                 |
| sc10050927.2    | 48-S  | 27.5154 | 1.74  | Nasp          | NM_016777.2 | Mus musculus nuclear autoantigenic sperm protein (histone-binding) (Nasp), mRNA.                                                |
| sc135434.19.159 | 3-S   | 27.489  | 1.8   | AW107703      | NM_198307.1 | Mus musculus expressed sequence AW107703 (AW107703), mRNA.                                                                      |
| sc119523.39     | 64-S  | 27.4827 | 2.4   | Notch1        | NM_008714.2 | Mus musculus Notch gene homolog 1 (Drosophila) (Notch1), mRNA.                                                                  |
| sc1071693.1     | 122-S | 27.4309 | 1.6   | Colec11       | XM_283054.2 | Mus musculus collectin sub-family member 11 (Colec11), mRNA.                                                                    |
| sc10001111.1    | 19-S  | 27.4117 | 1.77  | Mrps35        | NM_145573   | Mus musculus mitochondrial ribosomal protein S35 (Mrps35), mRNA.                                                                |
| sc10020842.1    | 84-S  | 27.3951 | 9.41  | Stag1         | NM_009282.2 | Mus musculus stromal antigen 1 (Stag1), mRNA.                                                                                   |
| sc10013039.1    | 128-S | 27.377  | 5.46  | Ctsl          | NM_009984.2 | Mus musculus cathepsin L (Ctsl), mRNA.                                                                                          |
| sc10018813.1    | 104-S | 27.341  | 2.51  | Pa2g4         | NM_011119.1 | Mus musculus proliferation-associated 2G4 (Pa2g4), mRNA.                                                                        |
| sc1066108.3     | 20-S  | 27.295  | 1.25  | Ndufa9        | NM_025358.1 | Mus musculus NADH dehydrogenase (ubiquinone) 1 alpha subcomplex, 9 (Ndufa9), mRNA.                                              |
| sc117924.1      | 368-S | 27.2869 | 2.73  | Fzd7          | NM_008057.2 | Mus musculus frizzled homolog 7 (Drosophila) (Fzd7), mRNA.                                                                      |
| sc135643.12.1   | 48-S  | 27.2657 | 8.22  | Lipc          | NM_008280.2 | Mus musculus lipase, hepatic (Lipc), mRNA.                                                                                      |
| sc10019301.2    | 74-S  | 27.2549 | 1.31  | Pxmp2         | NM_008993.1 | Mus musculus peroxisomal membrane protein 2 (Pxmp2), mRNA.                                                                      |
| sc131550.23.1   | 53-S  | 27.2485 | 2.1   | 2610511M17Rik | NM_028818.1 | Mus musculus RIKEN cDNA 2610511M17 gene (2610511M17Rik), mRNA.                                                                  |
| sc10015519.1    | 14-S  | 27.2259 | 12.15 | Hspca         | NM_010480   | Mus musculus heat shock protein 1, alpha (Hspca), mRNA.                                                                         |
| sc10003202.1    | 259-S | 27.2243 | 1.66  | Gpiap1        | NM_016739.2 | Mus musculus GPI-anchored membrane protein 1 (Gpiap1), mRNA.                                                                    |
| sc10001953.1    | 80-S  | 27.1965 | 3.95  | Smarca3       | NM_009210.1 | Mus musculus SWI/SNF related, matrix associated, actin dependent regulator of chromatin, subfamily a, member 3 (Smarca3), mRNA. |
| sc1011777.6     | 49-S  | 27.145  | 1.61  | Ap3s1         | NM_009681.2 | Mus musculus adaptor-related protein complex 3, sigma 1 subunit (Ap3s1), mRNA.                                                  |
| sc1068276.1     | 0-S   | 27.1096 | 1.49  | 4930584N22Rik | NM_026654.1 | Mus musculus RIKEN cDNA 4930584N22 gene (4930584N22Rik), mRNA.                                                                  |
| sc133220.5.1    | 30-S  | 27.056  | 1.3   | 1810017G16Rik | NM_021502.1 | Mus musculus RIKEN cDNA 1810017G16 gene (1810017G16Rik), mRNA.                                                                  |
| sc145598.20     | 218-S | 27.0522 | 1.49  | Ndrq2         | NM_013864   |                                                                                                                                 |
| sc135011.1.33   | 50-S  | 26.9773 | 3.25  | 1810011010Rik | NM_026931.1 | Mus musculus RIKEN cDNA 1810011010 gene (1810011010Rik), mRNA.                                                                  |
| sc10001911.1    | 22-S  | 26.9389 | 1.99  | Umps          | NM_009471.1 | Mus musculus uridine monophosphate synthetase (Umps), mRNA.                                                                     |
| sc1015381.1     | 4-S   | 26.9323 | 1.53  | Hnrpc         | NM_016884.1 | Mus musculus heterogeneous nuclear ribonucleoprotein C (Hnrpc), mRNA.                                                           |
| sc128068.2      | 468-S | 26.8987 | 7.43  | Fgl2          | NM_008013.2 | Mus musculus fibrinogen-like protein 2 (Fgl2), mRNA.                                                                            |
| sc139981.11     | 196-S | 26.841  | 1.5   | Dhx33         | NM_178367.3 | Mus musculus DEAH (Asp-Glu-Ala-His) box polypeptide 33 (Dhx33), mRNA.                                                           |
| sc10065973.1    | 101-S | 26.7891 | 2.03  | Asph          | NM_023066.1 | Mus musculus aspartate-beta-hydroxylase (Asph), mRNA.                                                                           |
| sc10067475.1    | 65-S  | 26.7878 | 1.67  | 1300013B24Rik | NM_026184.2 | Mus musculus RIKEN cDNA 1300013B24 gene (1300013B24Rik), mRNA.                                                                  |
| sc10067456.1    | 141-S | 26.7812 | 2.12  | 1200009B18Rik | NM_026168.1 | Mus musculus RIKEN cDNA 1200009B18 gene (1200009B18Rik), mRNA.                                                                  |
| sc141882.13     | 532-S | 26.7549 | 1.26  | Nipsnap1      | NM_008698.1 | Mus musculus 4-nitrophenylphosphatase domain and non-neuronal SNAP25-like protein homolog 1 (C. elegans) (Nipsnap1), mRNA.      |
| sc124791.10     | 1-S   | 26.7285 | 1.28  | Ddost         | NM_007838.2 | Mus musculus dolichyl-di-phosphooligosaccharide-protein glycotransferase (Ddost), mRNA.                                         |
| sc1018970.2     | 6-S   | 26.6676 | 1.88  | Polb          | NM_011130.1 | Mus musculus polymerase (DNA directed), beta (Polb), mRNA.                                                                      |
| sc100140629.2   | 137-S | 26.6553 | 1.86  | C330018L13Rik | NM_080562.2 | Mus musculus RIKEN cDNA C330018L13 gene (C330018L13Rik), mRNA.                                                                  |
| sc1067105.1     | 68-S  | 26.5513 | 1.29  | 1700034H14Rik | NM_025969.1 | Mus musculus RIKEN cDNA 1700034H14 gene (1700034H14Rik), mRNA.                                                                  |
| sc153489.23     | 479-S | 26.5091 | 3.02  | Pacs1         | XM_283545.1 | Mus musculus phosphofurin acidic cluster sorting protein 1 (Pacs1), mRNA.                                                       |
| sc126323.5.1    | 40-S  | 26.4996 | 5.05  | Plac8         | NM_139198.1 | Mus musculus placenta-specific 8 (Plac8), mRNA.                                                                                 |
| sc10102247.1    | 13-S  | 26.4344 | 1.39  | AU041707      | NM_018743.2 | Mus musculus expressed sequence AU041707 (AU041707), mRNA.                                                                      |
| sc130506.2      | 36-S  | 26.4261 | 1.41  | Iifit3        | NM_025378.1 | Mus musculus interferon induced transmembrane protein 3 (Iifit3), mRNA.                                                         |
| sc1067604.1     | 6-S   | 26.4178 | 1.34  | 1110007L15Rik | NM_026269.1 | Mus musculus RIKEN cDNA 1110007L15 gene (1110007L15Rik), mRNA.                                                                  |

|                      |         |       |               |             |                                                                                                               |
|----------------------|---------|-------|---------------|-------------|---------------------------------------------------------------------------------------------------------------|
| scl48484.12.1 8-S    | 26.4094 | 1.57  | Pla1a         | NM 134102   | Mus musculus phospholipase A1 member A (Pla1a), mRNA.                                                         |
| scl0216622.2 35-S    | 26.3649 | 2.58  | 4931440F15Rik | NM 176829.1 | Mus musculus RIKEN cDNA 4931440F15 gene (4931440F15Rik), mRNA.                                                |
| scl34044.10 124-S    | 26.3585 | 1.66  | Fbxo25        | NM 025785.1 | Mus musculus F-box only protein 25 (Fbxo25), mRNA.                                                            |
| scl0012763.1 321-S   | 26.3455 | 1.7   | Cmah          | NM 007717.1 | Mus musculus cytidine monophospho-N-acetylneuraminic acid hydroxylase (Cmah), mRNA.                           |
| scl000701.1 5-S      | 26.3384 | 3.71  | Appbp1        | NM 144931.1 | Mus musculus amyloid beta precursor protein binding protein 1 (Appbp1), mRNA.                                 |
| scl0003786.1 57-S    | 26.1814 | 4.47  | Prg           | NM 011157.1 | Mus musculus proteoglycan, secretory granule (Prg), mRNA.                                                     |
| scl42219.1 29-S      | 26.1584 | 1.46  | 0610007P14Rik | NM 021446   |                                                                                                               |
| scl00108735.2 193-S  | 26.095  | 1.44  | 2010005O13Rik | NM 145512.2 | Mus musculus RIKEN cDNA 2010005O13 gene (2010005O13Rik), mRNA.                                                |
| scl0002716.1 33-S    | 26.0571 | 1.22  | Scp2          | NM 011327.1 | Mus musculus sterol carrier protein 2, liver (Scp2), mRNA.                                                    |
| scl00231327.1 147-S  | 26.0278 | 2.99  | Ppat          | NM 172146.1 | Mus musculus phosphoribosyl pyrophosphate amidotransferase (Ppat), mRNA.                                      |
| scl0067105.1 17-S    | 26.0211 | 3.73  | 1700034H14Rik | NM 025969.1 | Mus musculus RIKEN cDNA 1700034H14 gene (1700034H14Rik), mRNA.                                                |
| scl067704.2 8-S      | 26.0111 | 1.36  | 1810037117Rik | NM 024461.1 | Mus musculus RIKEN cDNA 1810037117 gene (1810037117Rik), mRNA.                                                |
| scl0023806.2 110-S   | 26.0071 | 2.26  | Arih1         | NM 019927.1 | Mus musculus ariadne ubiquitin-conjugating enzyme E2 binding protein homolog 1 (Drosophila) (Arih1), mRNA.    |
| scl0214572.8 7-S     | 26.0042 | 2.32  | BC006705      | NM 145404.1 | Mus musculus cDNA sequence BC006705 (BC006705), mRNA.                                                         |
| scl0013085.1 15-S    | 25.9998 | 1.76  | Cyp2a12       | NM 133657.1 | Mus musculus cytochrome P450, family 2, subfamily a, polypeptide 12 (Cyp2a12), mRNA.                          |
| scl018693.12 2-S     | 25.9607 | 1.36  | Prkcabp       | NM 008837.1 | Mus musculus protein kinase C, alpha binding protein (Prkcabp), mRNA.                                         |
| scl0102462.1 25-S    | 25.9535 | 1.24  | 1190002L16Rik | NM 133976.1 | Mus musculus RIKEN cDNA 1190002L16 gene (1190002L16Rik), mRNA.                                                |
| scl0029809.2 171-S   | 25.9129 | 2.61  | Rabgap11      | NM 013862.3 |                                                                                                               |
| scl20013.3 0-S       | 25.8736 | 1.82  | Manbal        | XM 130628.2 |                                                                                                               |
| scl0011852.2 145-S   | 25.8528 | 2.14  | Rhob          | NM 007483.2 | Mus musculus ras homolog gene family, member B (Rhob), mRNA.                                                  |
| scl22402.6.1 12-S    | 25.8444 | 1.34  | Mrps28        | NM 025434.2 | Mus musculus mitochondrial ribosomal protein S28 (Mrps28), mRNA.                                              |
| scl0066206.2 25-S    | 25.7932 | 8.49  | 1110059E24Rik | NM 025423.1 | Mus musculus RIKEN cDNA 1110059E24 gene (1110059E24Rik), mRNA.                                                |
| scl066445.5 23-S     | 25.7879 | 1.41  | Cyc1          | NM 025567.1 | Mus musculus cytochrome c-1 (Cyc1), mRNA.                                                                     |
| scl45943.26 212-S    | 25.7832 | 1.85  | Kpnb3         | NM 023579.2 | Mus musculus karyopherin (importin) beta 3 (Kpnb3), mRNA.                                                     |
| scl43496.27.1 1-S    | 25.7809 | 1.41  | 2610528A15Rik | NM 028151.1 | Mus musculus RIKEN cDNA 2610528A15 gene (2610528A15Rik), mRNA.                                                |
| scl23145.17 313-S    | 25.7226 | 1.24  | Mbnl1         | NM 020007.2 | Mus musculus muscleblind-like 1 (Drosophila) (Mbnl1), mRNA.                                                   |
| scl23523.7.1 20-S    | 25.7131 | 1.28  | Fbxo6b        | NM 015797.1 | Mus musculus F-box only protein 6b (Fbxo6b), mRNA.                                                            |
| scl23111.16.8 12-S   | 25.7032 | 1.52  | Gfm           | NM 138591.1 | Mus musculus G elongation factor (Gfm), mRNA.                                                                 |
| scl0014453.2 277-S   | 25.691  | 5.71  | Gas2          | NM 008087.1 | Mus musculus growth arrest specific 2 (Gas2), mRNA.                                                           |
| scl31965.9 618-S     | 25.6526 | 1.27  | C430003P19Rik | NM 198017.1 | Mus musculus RIKEN cDNA C430003P19 gene (C430003P19Rik), mRNA.                                                |
| scl34998.4 500-S     | 25.6402 | 1.65  | B230378H13Rik | NM 177089.3 |                                                                                                               |
| scl48584.2 290-S     | 25.6282 | 1.54  | 1300018K11Rik | XM 148373.1 | Mus musculus RIKEN cDNA 1300018K11 gene (1300018K11Rik), mRNA.                                                |
| scl011536.1 57-S     | 25.6257 | 1.54  | Admr          | NM 007412.1 | Mus musculus adrenomedullin receptor (Admr), mRNA.                                                            |
| scl067582.10 107-S   | 25.6222 | 1.5   | Slc25a26      | NM 026255.2 | Mus musculus solute carrier family 25 (mitochondrial carrier; phosphate carrier), member 26 (Slc25a26), mRNA. |
| scl077781.2 11-S     | 25.6219 | 4.01  | Epm2aip1      | NM 175266.2 | Mus musculus EPM2A (laforin) interacting protein 1 (Epm2aip1), mRNA.                                          |
| scl0271278.1 67-S    | 25.5955 | 2.08  | BC024139      | NM 198172   | Mus musculus cDNA sequence BC024139 (BC024139), mRNA.                                                         |
| scl44881.2 33-S      | 25.5952 | 2.21  | 5730453H04Rik | NM 175338.2 | Mus musculus RIKEN cDNA 5730453H04 gene (5730453H04Rik), mRNA.                                                |
| scl018105.7 5-S      | 25.5798 | 1.53  | Nqo2          | NM 020282.2 | Mus musculus NAD(P)H dehydrogenase, quinone 2 (Nqo2), mRNA.                                                   |
| IGKV4-71 AJ231218 Ig | 25.5673 | 15.78 |               |             |                                                                                                               |
| scl00239318.2 162-S  | 25.5606 | 1.8   | Picxd3        | NM 177355.2 |                                                                                                               |
| scl16460.33 2-S      | 25.5168 | 9.25  | Hdlbp         | NM 133808.2 | Mus musculus high density lipoprotein (HDL) binding protein (Hdlbp), mRNA.                                    |
| scl53421.25 339-S    | 25.5084 | 1.39  | D19Erttd703e  | NM 029456.1 | Mus musculus DNA segment, Chr 19, ERATO Doi 703, expressed (D19Erttd703e), mRNA.                              |
| scl16174.14.1 64-S   | 25.5048 | 1.29  | BC003331      | NM 145511.1 | Mus musculus cDNA sequence BC003331 (BC003331), mRNA.                                                         |
| scl0012848.2 316-S   | 25.4999 | 1.29  | Cops2         | NM 009939.1 | Mus musculus COP9 (constitutive photomorphogenic) homolog, subunit 2 (Arabidopsis thaliana) (Cops2), mRNA.    |
| scl25073.4.1 109-S   | 25.4941 | 1.62  | lpp           | NM 008389.1 | Mus musculus IAP promoted placental gene (lpp), mRNA.                                                         |
| scl0017843.1 58-S    | 25.4741 | 11.65 | Mup4          | NM 008648.1 | Mus musculus major urinary protein 4 (Mup4), mRNA.                                                            |
| scl019349.2 45-S     | 25.4563 | 1.24  | Rab7          | NM 009005.1 | Mus musculus RAB7, member RAS oncogene family (Rab7), mRNA.                                                   |
| scl46303.7 279-S     | 25.427  | 1.24  | Lrp10         | NM 022993.2 | Mus musculus low-density lipoprotein receptor-related protein 10 (Lrp10), mRNA.                               |
| scl34037.34.366 10-S | 25.4254 | 2.72  | Arhgef10      | NM 172751.1 | Mus musculus Rho guanine nucleotide exchange factor (GEF) 10 (Arhgef10), mRNA.                                |
| scl35398.12.2 77-S   | 25.388  | 1.62  | Alas1         | NM 020559.1 | Mus musculus aminolevulinic acid synthase 1 (Alas1), mRNA.                                                    |
| scl22978.7.1 18-S    | 25.3739 | 1.23  | Krtcap2       | NM 025327.1 | Mus musculus keratinocyte associated protein 2 (Krtcap2), mRNA.                                               |
| scl23442.8 471-S     | 25.3689 | 1.26  | 1110060F11Rik | NM 026395.1 | Mus musculus RIKEN cDNA 1110060F11 gene (1110060F11Rik), mRNA.                                                |
| scl40322.5 155-S     | 25.3489 | 9.85  | Pttg1         | NM 013917.1 | Mus musculus pituitary tumor-transforming 1 (Pttg1), mRNA.                                                    |
| scl40072.13 201-S    | 25.3456 | 1.29  | Map2k4        | NM 009157   | Mus musculus mitogen activated protein kinase kinase 4 (Map2k4), mRNA.                                        |
| scl00107146.2 299-S  | 25.3062 | 1.31  | Glyat         | NM 145935.2 | Mus musculus glycine-N-acyltransferase (Glyat), mRNA.                                                         |
| scl014057.6 27-S     | 25.2869 | 1.41  | Sfxn1         | NM 027324.2 | Mus musculus sideroflexin 1 (Sfxn1), mRNA.                                                                    |

|                      |         |       |               |             |                                                                                                                              |
|----------------------|---------|-------|---------------|-------------|------------------------------------------------------------------------------------------------------------------------------|
| scl020280.7_0-S      | 25.2764 | 1.61  | Scp2          | NM_011327.1 | Mus musculus sterol carrier protein 2, liver (Scp2), mRNA.                                                                   |
| scl32592.2.658_11-S  | 25.26   | 2.16  | Ndn           | NM_010882.2 | Mus musculus necludin (Ndn), mRNA.                                                                                           |
| scl056378.6_20-S     | 25.255  | 1.28  | Arpc3         | NM_019824.2 | Mus musculus actin related protein 2/3 complex, subunit 3 (Arpc3), mRNA.                                                     |
| scl0023802.2_62-S    | 25.2544 | 1.22  | Amfr          | NM_011787.1 | Mus musculus autocrine motility factor receptor (Amfr), mRNA.                                                                |
| scl0018087.1_31-S    | 25.2264 | 2.1   | Nktr          | NM_010918.1 | Mus musculus natural killer tumor recognition sequence (Nktr), mRNA.                                                         |
| scl099650.7_29-S     | 25.1874 | 1.34  | 4933434E20Rik | NM_025762.1 | Mus musculus RIKEN cDNA 4933434E20 gene (4933434E20Rik), mRNA.                                                               |
| scl0011983.1_209-S   | 25.1809 | 1.29  | Atpif1        | NM_007512.2 |                                                                                                                              |
| scl0015381.1_237-S   | 25.1724 | 1.49  | Hnrpc         | NM_016884.1 | Mus musculus heterogeneous nuclear ribonucleoprotein C (Hnrpc), mRNA.                                                        |
| Gl_6679936-S         | 25.1682 | 1.3   | Gapd          | NM_008084.1 | Mus musculus glyceraldehyde-3-phosphate dehydrogenase (Gapd), mRNA.                                                          |
| scl41823.30_613-S    | 25.1484 | 2.06  | Egfr          | NM_207655.1 | Mus musculus epidermal growth factor receptor (Egfr), transcript variant 1, mRNA.                                            |
| scl00210146.1_172-S  | 25.1402 | 1.66  | AF322649      | NM_153134.2 | Mus musculus cDNA sequence AF322649 (AF322649), mRNA.                                                                        |
| scl0229279.5_20-S    | 25.0952 | 2.62  | 2610510D13Rik | NM_146130   |                                                                                                                              |
| scl0066408.1_304-S   | 25.0798 | 1.91  | Aptx          | NM_025545.2 | Mus musculus aprataxin (Aptx), mRNA.                                                                                         |
| scl0002903.1_3-S     | 25.0744 | 2.09  | 2700099C19Rik | NM_028303.1 | Mus musculus RIKEN cDNA 2700099C19 gene (2700099C19Rik), mRNA.                                                               |
| scl012925.2_22-S     | 25.0616 | 2.14  | Crip1         | NM_007763   | Mus musculus cysteine-rich protein 1 (intestinal) (Crip1), mRNA.                                                             |
| scl51719.2_118-S     | 25.0569 | 1.32  | Zadh2         | NM_146090.2 |                                                                                                                              |
| scl50673.7.1_4-S     | 25.048  | 1.47  | Mrpl2         | NM_025302.2 | Mus musculus mitochondrial ribosomal protein L2 (Mrpl2), mRNA.                                                               |
| scl26088.14.1_16-S   | 25.0468 | 1.22  | Aldh2         | NM_009656.1 | Mus musculus aldehyde dehydrogenase 2, mitochondrial (Aldh2), mRNA.                                                          |
| scl0013982.1_185-S   | 25.0372 | 9.38  | Esr1          | NM_007956.2 | Mus musculus estrogen receptor 1 (alpha) (Esr1), mRNA.                                                                       |
| scl50860.12.324_21-S | 25.0268 | 1.44  | Cyp4f15       | NM_134127.1 | Mus musculus cytochrome P450, family 4, subfamily f, polypeptide 15 (Cyp4f15), mRNA.                                         |
| scl28993.8_275-S     | 24.9742 | 1.37  | Hibadh        | NM_145567.1 | Mus musculus 3-hydroxyisobutyrate dehydrogenase (Hibadh), mRNA.                                                              |
| scl38677.11_311-S    | 24.8907 | 1.24  | Csnk1g2       | NM_134002.1 | Mus musculus casein kinase 1, gamma 2 (Csnk1g2), mRNA.                                                                       |
| scl0242960.1_52-S    | 24.8813 | 4.14  | Fbxl5         | NM_178729.2 | Mus musculus F-box and leucine-rich repeat protein 5 (Fbxl5), mRNA.                                                          |
| scl013209.11_23-S    | 24.8782 | 2.94  | Ddx6          | NM_007841.2 | Mus musculus DEAD (Asp-Glu-Ala-Asp) box polypeptide 6 (Ddx6), mRNA.                                                          |
| scl0001304.1_8-S     | 24.8746 | 2.03  | 4930579A11Rik | NM_029478.2 | Mus musculus RIKEN cDNA 4930579A11 gene (4930579A11Rik), mRNA.                                                               |
| scl0017314.1_97-S    | 24.8709 | 1.89  | Mgmt          | NM_008598.1 | Mus musculus O-6-methylguanine-DNA methyltransferase (Mgmt), mRNA.                                                           |
| scl066276.2_21-S     | 24.8671 | 1.44  | 1810009A15Rik | NM_025463.1 | Mus musculus RIKEN cDNA 1810009A15 gene (1810009A15Rik), mRNA.                                                               |
| scl000674.1_0-S      | 24.8365 | 1.81  | Iltg1         | NM_010578.1 | Mus musculus integrin beta 1 (fibronectin receptor beta) (Iltg1), mRNA.                                                      |
| scl0015950.1_6-S     | 24.8335 | 2.15  | Ifi203        | NM_008328.1 | Mus musculus interferon activated gene 203 (Ifi203), mRNA.                                                                   |
| scl0074182.2_93-S    | 24.82   | 1.57  | 2310032D16Rik | NM_027096.1 | Mus musculus RIKEN cDNA 2310032D16 gene (2310032D16Rik), mRNA.                                                               |
| scl070737.1_295-S    | 24.7991 | 37.35 | Cgn           | XM_131052.4 | Mus musculus cingulin (Cgn), mRNA.                                                                                           |
| scl41201.7.1_21-S    | 24.7935 | 1.33  | Vtn           | NM_011707.1 | Mus musculus vitronectin (Vtn), mRNA.                                                                                        |
| scl0107392.1_305-S   | 24.7901 | 1.46  | Brms1         | NM_134155.1 | Mus musculus breast cancer metastasis-suppressor 1 (Brms1), mRNA.                                                            |
| scl0218236.1_149-S   | 24.7704 | 1.79  | BC010304      | XM_127326.3 | Mus musculus cDNA sequence BC010304 (BC010304), mRNA.                                                                        |
| scl48818.18.1_43-S   | 24.7494 | 1.35  | Trap1         | NM_026508.1 |                                                                                                                              |
| scl30690.8_420-S     | 24.7406 | 3.3   | Nfatc2ip      | NM_010900.1 | Mus musculus nuclear factor of activated T-cells, cytoplasmic, calcineurin-dependent 2 interacting protein (Nfatc2ip), mRNA. |
| scl37659.18.259_11-S | 24.7142 | 1.6   | Tra1          | NM_011631.1 | Mus musculus tumor rejection antigen gp96 (Tra1), mRNA.                                                                      |
| scl46162.12.1_3-S    | 24.7082 | 9.47  | 4933425F03Rik | NM_028903.1 | Mus musculus RIKEN cDNA 4933425F03 gene (4933425F03Rik), mRNA.                                                               |
| scl0027096.1_27-S    | 24.6957 | 2.36  | Trappc3       | NM_013718.2 | Mus musculus trafficking protein particle complex 3 (Trappc3), mRNA.                                                         |
| scl0003169.1_64-S    | 24.6922 | 2.59  | BC028278      | XM_130696.2 |                                                                                                                              |
| scl000779.1_49-S     | 24.6864 | 1.56  | Lancl1        | NM_021295.1 | Mus musculus LanC (bacterial lantibiotic synthetase component C)-like 1 (Lancl1), mRNA.                                      |
| scl067706.2_5-S      | 24.6587 | 1.4   | 1810059G22Rik | NM_026325.1 | Mus musculus RIKEN cDNA 1810059G22 gene (1810059G22Rik), mRNA.                                                               |
| scl068180.6_62-S     | 24.5915 | 1.73  | 6430559E15Rik | XM_131537.4 | Mus musculus RIKEN cDNA 6430559E15 gene (6430559E15Rik), mRNA.                                                               |
| scl26349.2.101_165-S | 24.5911 | 4.51  | Gk2           | NM_010294.1 | Mus musculus glycerol kinase 2 (Gk2), mRNA.                                                                                  |
| scl0003259.1_330-S   | 24.5819 | 2.31  | Sh2d3c        | NM_013781.2 | Mus musculus SH2 domain containing 3C (Sh2d3c), mRNA.                                                                        |
| scl39316.7.1_30-S    | 24.5768 | 1.27  | Mrpl38        | NM_024177.2 | Mus musculus mitochondrial ribosomal protein L38 (Mrpl38), mRNA.                                                             |
| scl49313.9.1_27-S    | 24.5767 | 1.53  | Hrg           | NM_053176.1 | Mus musculus histidine-rich glycoprotein (Hrg), mRNA.                                                                        |
| scl0067480.2_9-S     | 24.569  | 2.97  | 1300013D05Rik | NM_026186.2 | Mus musculus RIKEN cDNA 1300013D05 gene (1300013D05Rik), mRNA.                                                               |
| scl20330.11.1_76-S   | 24.5589 | 1.34  | Blvra         | NM_026678.3 | Mus musculus biliverdin reductase A (Blvra), mRNA.                                                                           |
| scl067942.2_64-S     | 24.5417 | 1.27  | Atp5g2        | NM_026468.1 | Mus musculus ATP synthase, H+ transporting, mitochondrial F0 complex, subunit c (subunit 9), isoform 2 (Atp5g2), mRNA.       |
| scl0066827.2_11-S    | 24.5209 | 1.52  | Ttc1          | NM_133795.1 | Mus musculus tetraoctapeptide repeat domain 1 (Ttc1), mRNA.                                                                  |
| scl022147.3_29-S     | 24.5131 | 3     | Tuba7         | NM_009449.2 | Mus musculus tubulin, alpha 7 (Tuba7), mRNA.                                                                                 |
| scl33705.5.1_110-S   | 24.5026 | 1.32  | 2010315L10Rik | NM_025917.1 | Mus musculus RIKEN cDNA 2010315L10 gene (2010315L10Rik), mRNA.                                                               |
| scl30988.16_625-S    | 24.471  | 1.32  | 2700017M01Rik | NM_028292.1 | Mus musculus RIKEN cDNA 2700017M01 gene (2700017M01Rik), mRNA.                                                               |
| scl0001327.1_163-S   | 24.4681 | 1.88  | Trim41        | NM_145377   | Mus musculus tripartite motif-containing 41 (Trim41), mRNA.                                                                  |
| scl00214290.1_251-S  | 24.4502 | 1.31  | Zcchc6        | NM_153538.1 | Mus musculus zinc finger, CCHC domain containing 6 (Zcchc6), mRNA.                                                           |

|                        |       |         |      |               |             |                                                                                                                       |
|------------------------|-------|---------|------|---------------|-------------|-----------------------------------------------------------------------------------------------------------------------|
| sci067549.1            | 82-S  | 24.4485 | 1.42 | Gpr89         | NM_026229.1 |                                                                                                                       |
| sci0001105.1           | 0-S   | 24.44   | 2.28 | 4932409F11Rik | NM_029404.1 | Mus musculus RIKEN cDNA 4932409F11 gene (4932409F11Rik), mRNA.                                                        |
| sci30429.2.1           | 68-S  | 24.3897 | 1.91 | Gng11         | NM_025331.2 | Mus musculus guanine nucleotide binding protein (G protein), gamma 11 (Gng11), mRNA.                                  |
| sci31333.17.1          | 37-S  | 24.3868 | 3.71 | Ptpn5         | NM_013643.1 | Mus musculus protein tyrosine phosphatase, non-receptor type 5 (Ptpn5), mRNA.                                         |
| sci0021859.1           | 62-S  | 24.3651 | 1.36 | Timp3         | NM_011595.1 | Mus musculus tissue inhibitor of metalloproteinase 3 (Timp3), mRNA.                                                   |
| sci078121.4            | 47-S  | 24.334  | 2.05 | 9930116P15Rik | XM_127961.3 |                                                                                                                       |
| sci071679.3            | 0-S   | 24.323  | 1.22 | Atp5h         | NM_027862   | Mus musculus ATP synthase, H+ transporting, mitochondrial F0 complex, subunit d (Atp5h), mRNA.                        |
| sci52754.4             | 241-S | 24.2928 | 1.44 | 0610038F07Rik | NM_025333.2 | Mus musculus RIKEN cDNA 0610038F07 gene (0610038F07Rik), mRNA.                                                        |
| sci0014869.1           | 77-S  | 24.2803 | 2.35 | Gstp1         | NM_013541   | Mus musculus glutathione S-transferase, pi 1 (Gstp1), mRNA.                                                           |
| sci0067916.1           | 299-S | 24.2507 | 1.22 | Ppap2b        | NM_080555.1 | Mus musculus phosphatidic acid phosphatase type 2B (Ppap2b), mRNA.                                                    |
| sci45372.3             | 35-S  | 24.2481 | 1.57 | Mscp          | NM_030054.2 | Mus musculus mitochondrial solute carrier protein (Mscp), mRNA.                                                       |
| sci53380.11            | 494-S | 24.2325 | 1.33 | Fads1         | NM_146094.1 | Mus musculus fatty acid desaturase 1 (Fads1), mRNA.                                                                   |
| sci0002876.1           | 12-S  | 24.232  | 1.39 | Ard1          | NM_019870.1 | Mus musculus N-acetyltransferase ARD1 homolog (S. cerevisiae) (Ard1), mRNA.                                           |
| sci000251.1            | 1-S   | 24.2308 | 2.02 | Mrp148        | NM_026971.2 | Mus musculus mitochondrial ribosomal protein L48 (Mrp148), transcript variant 2, mRNA.                                |
| sci38270.7             | 86-S  | 24.2077 | 2.47 | Dnajc14       | NM_028873.2 |                                                                                                                       |
| gi_21070949_ref_NM_014 |       | 24.2042 | 1.91 | Ubc           | XM_147315.1 | Mus musculus ubiquitin C (Ubc), mRNA.                                                                                 |
| sci071664.1            | 311-S | 24.1983 | 1.3  | 0610006F02Rik | NM_027853.1 | Mus musculus RIKEN cDNA 0610006F02 gene (0610006F02Rik), mRNA.                                                        |
| sci48750.6             | 548-S | 24.1935 | 1.24 | C530044N13Rik | NM_146067   | Mus musculus RIKEN cDNA C530044N13 gene (C530044N13Rik), mRNA.                                                        |
| sci28963.13.1          | 27-S  | 24.1769 | 1.33 | Nt5c3         | NM_026004.1 | Mus musculus 5-nucleotidase, cytosolic III (Nt5c3), mRNA.                                                             |
| sci014961.2            | 4-S   | 24.0779 | 2.08 | Rmcs1         | NM_207105.1 | Mus musculus histocompatibility 2, class II antigen A, beta 1 (H2-Ab1), mRNA.                                         |
| sci29667.6             | 8-S   | 24.0714 | 1.6  | Bhlhb2        | NM_011498.2 | Mus musculus basic helix-loop-helix domain containing, class B2 (Bhlhb2), mRNA.                                       |
| sci17186.52.1          | 1-S   | 24.0655 | 3.03 | Spna1         | NM_011465.2 | Mus musculus spectrin alpha 1 (Spna1), mRNA.                                                                          |
| sci069038.2            | 4-S   | 24.0384 | 1.49 | 1810006K21Rik | XM_207074   | Mus musculus RIKEN cDNA 1810006K21 gene (1810006K21Rik), mRNA.                                                        |
| sci30281.25            | 19-S  | 23.9663 | 1.84 | 4631427C17Rik | NM_021414.2 | Mus musculus RIKEN cDNA 4631427C17 gene (4631427C17Rik), mRNA.                                                        |
| sci53217.16.138        | 16-S  | 23.9408 | 2.85 | Uhrf2         | NM_144873.1 | Mus musculus ubiquitin-like, containing PHD and RING finger domains 2 (Uhrf2), mRNA.                                  |
| sci078697.1            | 5-S   | 23.9293 | 1.98 | C330017115Rik | NM_178403.2 | Mus musculus RIKEN cDNA C330017115 gene (C330017115Rik), mRNA.                                                        |
| sci48651.6             | 179-S | 23.928  | 1.8  | Ehhadh        | NM_023737.2 | Mus musculus enoyl-Coenzyme A, hydratase/3-hydroxyacyl Coenzyme A dehydrogenase (Ehhadh), mRNA.                       |
| sci49869.7.1           | 26-S  | 23.8533 | 2.03 | Slc22a7       | NM_144856.1 | Mus musculus solute carrier family 22 (organic anion transporter), member 7 (Slc22a7), mRNA.                          |
| sci46638.4             | 82-S  | 23.839  | 1.73 | Kctd6         | NM_027782.1 | Mus musculus potassium channel tetramerisation domain containing 6 (Kctd6), mRNA.                                     |
| sci44070.4.1           | 3-S   | 23.83   | 3.28 | Eef1e1        | NM_025380.1 | Mus musculus eukaryotic translation elongation factor 1 epsilon 1 (Eef1e1), mRNA.                                     |
| sci0002777.1           | 339-S | 23.8269 | 2.19 | Ak2           | NM_016895.2 | Mus musculus adenylate kinase 2 (Ak2), mRNA.                                                                          |
| sci48122.9.2           | 1-S   | 23.8149 | 1.64 | C9            | NM_013485.1 | Mus musculus complement component 9 (C9), mRNA.                                                                       |
| sci33324.19.245        | 0-S   | 23.7789 | 1.7  | D8Wsu151e     | NM_146216.2 | Mus musculus DNA segment, Chr 8, Wayne State University 151, expressed (D8Wsu151e), mRNA.                             |
| sci22773.20.1          | 35-S  | 23.7218 | 2.83 | Phf1          | XM_356222.1 | Mus musculus putative homeodomain transcription factor 1 (Phf1), mRNA.                                                |
| sci52902.14.1          | 38-S  | 23.6983 | 2.41 | Stip1         | NM_016737.1 | Mus musculus stress-induced phosphoprotein 1 (Stip1), mRNA.                                                           |
| sci24770.15            | 172-S | 23.6971 | 1.33 | Aldh4a1       | NM_175438   | Mus musculus aldehyde dehydrogenase 4 family, member A1 (Aldh4a1), mRNA.                                              |
| sci071704.9            | 277-S | 23.6832 | 1.63 | Arhgef3       | NM_027871.1 | Mus musculus Rho guanine nucleotide exchange factor (GEF) 3 (Arhgef3), mRNA.                                          |
| sci20329.42.1          | 43-S  | 23.6741 | 1.56 | Ascc3l1       | NM_177214.3 |                                                                                                                       |
| sci018087.13           | 25-S  | 23.6539 | 5.1  | Nktr          | NM_010918.1 | Mus musculus natural killer tumor recognition sequence (Nktr), mRNA.                                                  |
| sci072747.10           | 28-S  | 23.6531 | 2.4  | 2810439F02Rik | NM_028341.1 | Mus musculus RIKEN cDNA 2810439F02 gene (2810439F02Rik), mRNA.                                                        |
| sci0002929.1           | 32-S  | 23.6479 | 1.66 | 2610029G23Rik | NM_026312.2 | Mus musculus RIKEN cDNA 2610029G23 gene (2610029G23Rik), mRNA.                                                        |
| sci35702.23.1          | 49-S  | 23.6438 | 1.54 | AV340375      | NM_172519.1 | Mus musculus expressed sequence AV340375 (AV340375), mRNA.                                                            |
| sci46929.4             | 12-S  | 23.6182 | 1.24 | Phf5a         | NM_026737.1 | Mus musculus PHD finger protein 5A (Phf5a), mRNA.                                                                     |
| sci0227800.12          | 249-S | 23.5356 | 1.26 | Rabgap1       | NM_146121.1 | Mus musculus RAB GTPase activating protein 1 (Rabgap1), mRNA.                                                         |
| sci38692.8.1           | 47-S  | 23.5309 | 1.42 | Atp5d         | NM_025313.1 | Mus musculus ATP synthase, H+ transporting, mitochondrial F1 complex, delta subunit (Atp5d), mRNA.                    |
| sci0004181.1           | 42-S  | 23.5282 | 1.53 | Vps29         | NM_019780.1 | Mus musculus vacuolar protein sorting 29 (S. pombe) (Vps29), mRNA.                                                    |
| sci32817.6.1           | 8-S   | 23.5196 | 3.35 | Tyrbp         | NM_011662.2 | Mus musculus TYRO protein tyrosine kinase binding protein (Tyrbp), mRNA.                                              |
| sci19300.3.1           | 12-S  | 23.5165 | 1.52 | 2010311D03Rik | NM_133839.1 | Mus musculus RIKEN cDNA 2010311D03 gene (2010311D03Rik), mRNA.                                                        |
| sci53101.26.1          | 9-S   | 23.5038 | 1.52 | Abcc2         | NM_013806.1 | Mus musculus ATP-binding cassette, sub-family C (CFTR/MRP), member 2 (Abcc2), mRNA.                                   |
| sci22849.16.1          | 85-S  | 23.4869 | 1.3  | Pdzk1         | NM_021517   | Mus musculus PDZ domain containing 1 (Pdzk1), mRNA.                                                                   |
| sci00244202.2          | 30-S  | 23.4681 | 4.57 | Nalp10        | NM_175532.2 | Mus musculus NACHT, leucine rich repeat and PYD containing 10 (Nalp10), mRNA.                                         |
| sci29514.8.22          | 6-S   | 23.4546 | 1.27 | Mif2          | NM_145385.1 | Mus musculus myeloid leukemia factor 2 (Mif2), mRNA.                                                                  |
| sci19173.28.1          | 24-S  | 23.4364 | 1.56 | Abcb11        | NM_021022.2 | Mus musculus ATP-binding cassette, sub-family B (MDR/TAP), member 11 (Abcb11), mRNA.                                  |
| sci0140492.8           | 64-S  | 23.4104 | 2.01 | Kcnn2         | NM_080465.1 | Mus musculus potassium intermediate/small conductance calcium-activated channel, subfamily N, member 2 (Kcnn2), mRNA. |
| sci35771.8.1           | 41-S  | 23.3525 | 7.2  | 2410076I21Rik | XM_134948.2 | Mus musculus RIKEN cDNA 2410076I21 gene (2410076I21Rik), mRNA.                                                        |
| sci074114.18           | 49-S  | 23.3368 | 4.65 | Crot          | NM_023733.2 | Mus musculus carnitine O-octanoyltransferase (Crot), mRNA.                                                            |

|                |             |         |      |               |             |                                                                                                  |
|----------------|-------------|---------|------|---------------|-------------|--------------------------------------------------------------------------------------------------|
| sci0019188.1   | 50-S        | 23.3211 | 1.48 | Psme2         | NM_011190.2 | Mus musculus proteasome (prosome, macropain) 28 subunit, beta (Psme2), mRNA.                     |
| sci16476.4     | 568-S       | 23.3063 | 1.59 | Hes6          | NM_019479.2 | Mus musculus hairy and enhancer of split 6 (Drosophila) (Hes6), mRNA.                            |
| sci46038.17.1  | 26-S        | 23.2966 | 1.78 | Tdrd3         | NM_172605.2 | Mus musculus tudor domain containing 3 (Tdrd3), mRNA.                                            |
| sci00353187.1  | 48-S        | 23.2498 | 2.98 | Nr1d2         | NM_011584.2 | Mus musculus nuclear receptor subfamily 1, group D, member 2 (Nr1d2), mRNA.                      |
| sci53554.5.129 | 30-S        | 23.2108 | 1.78 | Bad           | NM_007522.1 | Mus musculus Bcl-associated death promoter (Bad), mRNA.                                          |
| sci0067210.1   | 10-S        | 23.1875 | 5.65 | Odag          | NM_026033.1 | Mus musculus ocular development associated gene (Odag), mRNA.                                    |
| sci00224938.2  | 37-S        | 23.1864 | 1.27 | Pja2          | NM_144859.1 | Mus musculus praja 2, RING-H2 motif containing (Pja2), mRNA.                                     |
| sci00319713.1  | 52-S        | 23.1775 | 2.32 | D930036B08Rik | NM_198649.1 | Mus musculus RIKEN cDNA D930036B08 gene (D930036B08Rik), mRNA.                                   |
| sci0234736.2   | 42-S        | 23.1609 | 2.7  | BC027246      | XM_355947.1 | Mus musculus cDNA sequence BC027246 (BC027246), mRNA.                                            |
| sci43966.3     | 250-S       | 23.1602 | 2.47 | Nfil3         | NM_017373.2 | Mus musculus nuclear factor, interleukin 3, regulated (Nfil3), mRNA.                             |
| sci0001383.1   | 41-S        | 23.0575 | 1.41 | Six8          | NM_018768.1 | Mus musculus syntaxin 8 (Stx8), mRNA.                                                            |
| sci0217695.1   | 22-S        | 23.0566 | 1.87 | Zfyve1        | NM_183154.1 | Mus musculus zinc finger, FYVE domain containing 1 (Zfyve1), mRNA.                               |
| sci00226432.1  | 235-S       | 23.0218 | 1.54 | Ipo9          | XM_129442.3 | Mus musculus importin 9 (Ipo9), mRNA.                                                            |
| sci0107094.1   | 210-S       | 23.0082 | 1.37 | AA408556      | NM_199447.2 | Mus musculus expressed sequence AA408556 (AA408556), mRNA.                                       |
| sci42978.1     | 15-S        | 22.9926 | 1.38 | 2310020H19Rik | NM_025525   | Mus musculus RIKEN cDNA 2310020H19 gene (2310020H19Rik), mRNA.                                   |
| sci056631.7    | 231-S       | 22.9742 | 1.89 | Trim17        | NM_031172.1 | Mus musculus tripartite motif protein 17 (Trim17), mRNA.                                         |
| sci41427.25.1  | 159-S       | 22.9424 | 1.67 | Elac2         | NM_023479.1 | Mus musculus elaC homolog 2 (E. coli) (Elac2), mRNA.                                             |
| sci46231.15    | 279-S       | 22.8724 | 1.27 | Cab39l        | NM_026908.2 |                                                                                                  |
| sci36049.8     | 66-S        | 22.8435 | 2.44 | Tirap         | NM_054096.1 | Mus musculus toll-interleukin 1 receptor (TIR) domain-containing adaptor protein (Tirap), mRNA.  |
| sci45946.14    | 20-S        | 22.841  | 1.99 | Mbnl2         | NM_207515.1 | Mus musculus muscleblind-like 2 (Mbnl2), transcript variant 1, mRNA.                             |
| sci022130.13   | 33-S        | 22.8178 | 2.23 | Ttf1          | NM_009442.1 | Mus musculus transcription termination factor 1 (Ttf1), mRNA.                                    |
| sci072508.1    | 0-S         | 22.7997 | 3.97 | Rps6kb1       | NM_028259.1 | Mus musculus ribosomal protein S6 kinase, polypeptide 1 (Rps6kb1), mRNA.                         |
| sci00226747.2  | 221-S       | 22.7987 | 2.36 | Elys          | NM_026375.1 | Mus musculus embryonic large molecule derived from yolk sac (Elys), mRNA.                        |
| sci50024.4.1   | 14-S        | 22.7341 | 1.77 | H2-Ea         | NM_010381.2 | Mus musculus histocompatibility 2, class II antigen E alpha (H2-Ea), mRNA.                       |
| sci42012.5.1   | 30-S        | 22.7202 | 2.22 | Nudt14        | NM_025399.1 | Mus musculus nudix (nucleoside diphosphate linked moiety X)-type motif 14 (Nudt14), mRNA.        |
| sci074194.1    | 11-S        | 22.6782 | 8.39 | Rhoe          | NM_028810.1 | Mus musculus ras homolog gene family, member E (Rhoe), mRNA.                                     |
| sci0067684.1   | 211-S       | 22.6753 | 1.4  | 3300001P08Rik | NM_026313.1 | Mus musculus RIKEN cDNA 3300001P08 gene (3300001P08Rik), mRNA.                                   |
| sci0027410.2   | 52-S        | 22.6734 | 2.43 | Abca3         | NM_013855.1 | Mus musculus ATP-binding cassette, sub-family A (ABC1), member 3 (Abca3), mRNA.                  |
| sci0003065.1   | 14-S        | 22.5996 | 1.41 | H13           | NM_010376.2 | Mus musculus histocompatibility 13 (H13), mRNA.                                                  |
| sci30734.8.1   | 4-S         | 22.5926 | 1.35 | Crym          | NM_016669.1 | Mus musculus crystallin, mu (Crym), mRNA.                                                        |
| sci028028.1    | 213-S       | 22.5826 | 1.25 | Mrp150        | NM_178603.2 | Mus musculus mitochondrial ribosomal protein L50 (Mrp150), mRNA.                                 |
| sci51888.24    | 434-S       | 22.5555 | 2.06 | Pdgfrb        | NM_008809.1 | Mus musculus platelet derived growth factor receptor, beta polypeptide (Pdgfrb), mRNA.           |
| sci0072098.1   | 29-S        | 22.5167 | 2.5  | 2010300G19Rik | NM_028097.2 | Mus musculus RIKEN cDNA 2010300G19 gene (2010300G19Rik), mRNA.                                   |
| sci066335.13   | 14-S        | 22.4898 | 1.4  | Atp6v1c1      | NM_025494.1 | Mus musculus ATPase, H+ transporting, V1 subunit C, isoform 1 (Atp6v1c1), mRNA.                  |
| sci0002566.1   | 2-S         | 22.4875 | 1.64 | Myg1          | NM_021713.1 | Mus musculus melanocyte proliferating gene 1 (Myg1), mRNA.                                       |
| sci0001820.1   | 53-S        | 22.4661 | 2.18 | Son           | NM_019973.1 | Mus musculus Son cell proliferation protein (Son), transcript variant 1, mRNA.                   |
| sci0229227.1   | 8-S         | 22.461  | 2.65 | D630029K19Rik | NM_172880.2 | Mus musculus RIKEN cDNA D630029K19 gene (D630029K19Rik), mRNA.                                   |
| sci55045.9     | 124-S       | 22.4553 | 1.79 | Tm4sf2        | NM_019634.1 | Mus musculus transmembrane 4 superfamily member 2 (Tm4sf2), mRNA.                                |
| IGKV4-62       | AJ231210 Ig | 22.4407 | 7.78 |               |             |                                                                                                  |
| sci0076497.2   | 72-S        | 22.3867 | 1.34 | Ppp1r11       | NM_029632.1 | Mus musculus protein phosphatase 1, regulatory (inhibitor) subunit 11 (Ppp1r11), mRNA.           |
| sci019885.11   | 24-S        | 22.3751 | 2.29 | Rorc          | NM_011281.1 | Mus musculus RAR-related orphan receptor gamma (Rorc), mRNA.                                     |
| sci29631.10    | 10-S        | 22.3651 | 1.36 | CrelD1        | NM_133930.1 | Mus musculus cysteine-rich with EGF-like domains 1 (CrelD1), mRNA.                               |
| sci22672.6.1   | 17-S        | 22.3629 | 4.29 | F3            | NM_010171.2 | Mus musculus coagulation factor III (F3), mRNA.                                                  |
| sci0223672.1   | 326-S       | 22.3415 | 2.13 | LOC223672     | XM_128064.4 | Mus musculus hypothetical protein LOC223672 (LOC223672), mRNA.                                   |
| sci000176.1    | 12-S        | 22.3405 | 1.56 | Psma1         | NM_011965   | Mus musculus proteasome (prosome, macropain) subunit, alpha type 1 (Psma1), mRNA.                |
| sci27370.13    | 382-S       | 22.3063 | 1.28 | Sppl3         | NM_029012.1 |                                                                                                  |
| sci0066884.2   | 148-S       | 22.2722 | 1.28 | Appbp2        | NM_025825.2 | Mus musculus amyloid beta precursor protein (cytoplasmic tail) binding protein 2 (Appbp2), mRNA. |
| sci50156.18    | 539-S       | 22.254  | 1.79 | Rab11fip3     | NM_153140.1 |                                                                                                  |
| sci41711.15    | 185-S       | 22.2497 | 3.08 | Fbxw11        | NM_134015.1 |                                                                                                  |
| sci40710.6.1   | 96-S        | 22.243  | 1.91 | 2310004N24Rik | XM_181318.4 | Mus musculus RIKEN cDNA 2310004N24 gene (2310004N24Rik), mRNA.                                   |
| sci0011938.1   | 293-S       | 22.2344 | 3.31 | Atp2a2        | NM_009722.1 | Mus musculus ATPase, Ca++ transporting, cardiac muscle, slow twitch 2 (Atp2a2), mRNA.            |
| sci066922.3    | 13-S        | 22.2337 | 1.84 | Rras2         | NM_025846.1 | Mus musculus related RAS viral (r-ras) oncogene homolog 2 (Rras2), mRNA.                         |
| sci40850.12.1  | 163-S       | 22.2334 | 1.24 | Nmt1          | NM_008707.2 | Mus musculus N-myristoyltransferase 1 (Nmt1), mRNA.                                              |
| sci030204.2    | 97-S        | 22.227  | 1.99 | 4833442J19Rik | NM_177101.2 | Mus musculus RIKEN cDNA 4833442J19 gene (4833442J19Rik), mRNA.                                   |
| sci22833.10    | 29-S        | 22.2259 | 1.35 | Hmgcs2        | NM_008256.2 | Mus musculus 3-hydroxy-3-methylglutaryl-Coenzyme A synthase 2 (Hmgcs2), mRNA.                    |
| sci27787.7     | 486-S       | 22.2233 | 1.49 | 0610040J01Rik | NM_029554.2 | Mus musculus RIKEN cDNA 0610040J01 gene (0610040J01Rik), mRNA.                                   |

|                       |         |       |               |                   |                                                                                                                                                                |
|-----------------------|---------|-------|---------------|-------------------|----------------------------------------------------------------------------------------------------------------------------------------------------------------|
| scl000968.1 12-S      | 22.2111 | 2.31  | Uchl5         | NM_019562.1       | Mus musculus ubiquitin carboxyl-terminal esterase L5 (Uchl5), mRNA.                                                                                            |
| scl41115.27.1 34-S    | 22.1998 | 4.1   | Myohd1        | NM_025414.2       | Mus musculus myosin head domain containing 1 (Myohd1), mRNA.                                                                                                   |
| scl0014664.2 299-S    | 22.145  | 1.35  | Slc6a9        | NM_008135.1       | Mus musculus solute carrier family 6 (neurotransmitter transporter, glycine), member 9 (Slc6a9), mRNA.                                                         |
| scl47072.5 281-S      | 22.1377 | 2.59  | Ly6a          | NM_010738.2       | Mus musculus lymphocyte antigen 6 complex, locus A (Ly6a), mRNA.                                                                                               |
| scl47123.18 98-S      | 22.1174 | 2.02  | Ndrp1         | NM_010884.1       |                                                                                                                                                                |
| scl0015379.2 121-S    | 22.1063 | 2.8   | Onecut1       | NM_008262.2       | Mus musculus one cut domain, family member 1 (Onecut1), mRNA.                                                                                                  |
| scl27764.24 495-S     | 22.0975 | 1.25  | B3bp          | XM_132065.3       |                                                                                                                                                                |
| scl53403.26.13 76-S   | 22.0949 | 1.21  | Bscl2         | NM_008144.3       | Mus musculus Bernardinelli-Seip congenital lipodystrophy 2 homolog (human) (Bscl2), mRNA.                                                                      |
| scl0002700.1 45-S     | 21.9907 | 1.43  | Nbn           | NM_013752         | Mus musculus nibrin (Nbn), mRNA.                                                                                                                               |
| scl31487.7.1 48-S     | 21.9842 | 1.62  | 6030457N17Rik | XM_133378.3       | Mus musculus RIKEN cDNA 6030457N17 gene (6030457N17Rik), mRNA.                                                                                                 |
| scl45926.20.1 29-S    | 21.9691 | 1.6   | Pcca          | NM_144844.1       | Mus musculus propionyl-Coenzyme A carboxylase, alpha polypeptide (Pcca), mRNA.                                                                                 |
| gj_6679936_ref NM_008 | 21.9672 | 1.33  |               |                   |                                                                                                                                                                |
| scl00244713.2 109-S   | 21.9267 | 2.61  | Zfp75         | NM_172918.3       |                                                                                                                                                                |
| scl35384.3.9 24-S     | 21.9256 | 2.44  | Armet         | NM_029103.1       | Mus musculus arginine-rich, mutated in early stage tumors (Armet), mRNA.                                                                                       |
| scl45724.3.1 2-S      | 21.9166 | 1.77  | 2200001115Rik | NM_183278.1       | Mus musculus RIKEN cDNA 2200001115 gene (2200001115Rik), mRNA.                                                                                                 |
| scl28759.2 148-S      | 21.9    | 1.54  | Cml1          | NM_023160.1       | Mus musculus camello-like 1 (Cml1), mRNA.                                                                                                                      |
| scl067246.4 216-S     | 21.8792 | 2.79  | 2810474O19Rik | XM_132966.3       | Mus musculus RIKEN cDNA 2810474O19 gene (2810474O19Rik), mRNA.                                                                                                 |
| scl40200.14 192-S     | 21.8526 | 1.38  | 1810073G14Rik | NM_026342.1       | Mus musculus RIKEN cDNA 1810073G14 gene (1810073G14Rik), mRNA.                                                                                                 |
| scl066916.1 19-S      | 21.8417 | 2     | Ndulfb7       | NM_025843.1       | Mus musculus NADH dehydrogenase (ubiquinone) 1 beta subcomplex, 7 (Ndulfb7), mRNA.                                                                             |
| scl0170658.2 22-S     | 21.839  | 1.21  | Ndufs5        | XM_355517.1       | Mus musculus NADH dehydrogenase (ubiquinone) Fe-S protein 5 (Ndufs5), mRNA.                                                                                    |
| scl25188.13.1 0-S     | 21.8141 | 1.59  | C8b           | NM_133882.1       | Mus musculus complement component 8, beta subunit (C8b), mRNA.                                                                                                 |
| scl44903.11.3 96-S    | 21.8038 | 1.5   | Fars1         | NM_024274.1       | Mus musculus phenylalanine-tRNA synthetase 1 (mitochondrial) (Fars1), mRNA.                                                                                    |
| scl022190.1 154-S     | 21.7656 | 2.24  | Ubc           | XM_147315.1       | Mus musculus ubiquitin C (Ubc), mRNA.                                                                                                                          |
| IGKV4-79_AJ231214_Ig  | 21.7527 | 11.03 | LOC213684     | XM_135590.2       | Mus musculus similar to immunoglobulin light chain variable region (LOC213684), mRNA.                                                                          |
| scl068943.2 5-S       | 21.742  | 1.27  | Pink1         | NM_026880         | Mus musculus PTEN induced putative kinase 1 (Pink1), mRNA.                                                                                                     |
| scl080751.6 5-S       | 21.7369 | 1.43  | Rnf34         | NM_030564.1       | Mus musculus ring finger protein 34 (Rnf34), mRNA.                                                                                                             |
| scl50218.10.128 2-S   | 21.6968 | 1.82  | 5730457F11Rik | NM_172935         | Mus musculus RIKEN cDNA 5730457F11 gene (5730457F11Rik), mRNA.                                                                                                 |
| scl26903.5 40-S       | 21.6804 | 23.27 | Al481214      | NM_054098.2       |                                                                                                                                                                |
| scl0003493.1 408-S    | 21.6717 | 2.56  | Ppp1r1c       | NM_033264.1       | Mus musculus protein phosphatase 1, regulatory (inhibitor) subunit 1C (Ppp1r1c), mRNA.                                                                         |
| scl0002080.1 55-S     | 21.6696 | 1.48  |               | 39340 NM_053102.1 |                                                                                                                                                                |
| scl34059.10 20-S      | 21.6624 | 1.21  | Lamp1         | NM_010684         | Mus musculus lysosomal membrane glycoprotein 1 (Lamp1), mRNA.                                                                                                  |
| scl21036.31.1 8-S     | 21.6537 | 1.88  | Mapkap1       | NM_177345.2       | Mus musculus mitogen-activated protein kinase associated protein 1 (Mapkap1), mRNA.                                                                            |
| scl32648.17 169-S     | 21.5889 | 1.22  | Gtf2h1        | NM_008186.2       | Mus musculus general transcription factor II H, polypeptide 1 (Gtf2h1), mRNA.                                                                                  |
| scl34420.4.1 19-S     | 21.5764 | 2.68  | Cklfs4        | NM_153582.3       | Mus musculus chemokine-like factor super family 4 (Cklfs4), mRNA.                                                                                              |
| scl0074144.2 313-S    | 21.5171 | 1.28  | Robo4         | NM_028783.2       | Mus musculus roundabout homolog 4 (Drosophila) (Robo4), mRNA.                                                                                                  |
| scl19399.8 192-S      | 21.4709 | 1.33  | Epb7.2        | NM_013515.1       | Mus musculus erythrocyte protein band 7.2 (Epb7.2), mRNA.                                                                                                      |
| scl45512.6.1 7-S      | 21.4475 | 2.01  | Gzmn          | NM_153052.1       | Mus musculus granzyme N (Gzmn), mRNA.                                                                                                                          |
| scl0015446.2 268-S    | 21.4433 | 1.53  | Hpgd          | NM_008278.1       | Mus musculus hydroxyprostaglandin dehydrogenase 15 (NAD) (Hpgd), mRNA.                                                                                         |
| scl00225358.2 258-S   | 21.441  | 1.75  | 2610024E20Rik | NM_146084.1       |                                                                                                                                                                |
| scl076014.3 8-S       | 21.4244 | 1.46  | 5830416A07Rik | NM_024268.1       | Mus musculus RIKEN cDNA 5830416A07 gene (5830416A07Rik), mRNA.                                                                                                 |
| scl21095.3.1 3-S      | 21.4189 | 1.28  | Endog         | NM_007931.1       | Mus musculus endonuclease G (Endog), mRNA.                                                                                                                     |
| scl00319157.1 0-S     | 21.4106 | 1.9   | Hist1h4f      | NM_175655.1       | Mus musculus histone 1, H4f (Hist1h4f), mRNA.                                                                                                                  |
| scl0011677.2 223-S    | 21.404  | 3.04  | Akr1b3        | NM_009658.2       | Mus musculus aldo-keto reductase family 1, member B3 (aldose reductase) (Akr1b3), mRNA.                                                                        |
| scl019298.8 30-S      | 21.3784 | 1.21  | Pex19         | NM_023041.2       | Mus musculus peroxisome biogenesis factor 19 (Pex19), mRNA.                                                                                                    |
| scl066242.2 14-S      | 21.3777 | 1.49  | Mrps16        | NM_025440.1       | Mus musculus mitochondrial ribosomal protein S16 (Mrps16), mRNA.                                                                                               |
| scl079464.11 51-S     | 21.3753 | 1.42  | Lias          | NM_024471.2       | Mus musculus lipioic acid synthetase (Lias), mRNA.                                                                                                             |
| scl093836.1 167-S     | 21.3678 | 2.22  | Rnf111        | NM_033604.1       | Mus musculus ring finger 111 (Rnf111), mRNA.                                                                                                                   |
| scl41336.2.1 23-S     | 21.3071 | 1.25  | C730027E14Rik | NM_146020.1       | Mus musculus RIKEN cDNA C730027E14 gene (C730027E14Rik), mRNA.                                                                                                 |
| scl0102294.1 224-S    | 21.2934 | 1.95  | Cyp4v3        | NM_133969.1       | Mus musculus cytochrome P450, family 4, subfamily v, polypeptide 3 (Cyp4v3), mRNA.                                                                             |
| scl0070503.2 198-S    | 21.2932 | 1.82  | 5730402C02Rik | NM_027442.3       |                                                                                                                                                                |
| scl0231386.4 56-S     | 21.2858 | 1.33  | A730098D12Rik | NM_177680.2       | Mus musculus RIKEN cDNA A730098D12 gene (A730098D12Rik), mRNA.                                                                                                 |
| scl068776.1 229-S     | 21.2319 | 1.29  | Taf11         | NM_026836.1       | Mus musculus TAF11 RNA polymerase II, TATA box binding protein (TBP)-associated factor (Taf11), mRNA.                                                          |
| scl0001737.1 18-S     | 21.2235 | 1.33  | AK002608.1    |                   | Mus musculus adult male kidney cDNA, RIKEN full-length enriched library, clone:0610012J07 product:3-hydroxyanthranilate 3,4-dioxygenase, full insert sequence. |
| scl019186.11 4-S      | 21.2056 | 1.26  | Psme1         | NM_011189.1       | Mus musculus proteasome (prosome, macropain) 28 subunit, alpha (Psme1), mRNA.                                                                                  |
| scl000093.1 57_REVCOM | 21.2018 | 1.29  | 0610007P22Rik | NM_026676.1       | Mus musculus RIKEN cDNA 0610007P22 gene (0610007P22Rik), mRNA.                                                                                                 |
| scl25991.5.1 3-S      | 21.2001 | 1.24  | Sbds          | NM_023248.1       | Mus musculus Schwachman-Bodian-Diamond syndrome homolog (human) (Sbds), mRNA.                                                                                  |

|                      |         |      |               |             |                                                                                                                                                                          |
|----------------------|---------|------|---------------|-------------|--------------------------------------------------------------------------------------------------------------------------------------------------------------------------|
| scI0217837.1 325-S   | 21.1994 | 1.31 | Itpk1         | NM 172584.1 | Mus musculus inositol 1,3,4-triphosphate 5/6 kinase (Itpk1), mRNA.                                                                                                       |
| scI012799.3 0-S      | 21.1582 | 2.54 | Cnp1          | NM 009923.1 | Mus musculus cyclic nucleotide phosphodiesterase 1 (Cnp1), mRNA.                                                                                                         |
| scI53274.2 128-S     | 21.1533 | 1.27 | Bteb1         | NM 010638.2 | Mus musculus basic transcription element binding protein 1 (Bteb1), mRNA.                                                                                                |
| scI18545.1 131-S     | 21.115  | 7.4  | Thbd          | NM 009378.1 | Mus musculus thrombomodulin (Thbd), mRNA.                                                                                                                                |
| scI026889.3 52-S     | 21.1477 | 1.42 | Cln8          | NM 012000.2 | Mus musculus ceroid-lipofuscinosis, neuronal 8 (Cln8), mRNA.                                                                                                             |
| scI40132.19.1 31-S   | 21.132  | 1.5  | 1300013J15Rik | NM 026183.2 | Mus musculus RIKEN cDNA 1300013J15 gene (1300013J15Rik), mRNA.                                                                                                           |
| scI00269587.2 100-S  | 21.1243 | 1.66 | Epb4.1        | NM 183428.2 | Mus musculus erythrocyte protein band 4.1 (Epb4.1), mRNA.                                                                                                                |
| scI35712.22.1 80-S   | 21.1141 | 2.46 | 4921504K03Rik | XM 134960.2 | Mus musculus RIKEN cDNA 4921504K03 gene (4921504K03Rik), mRNA.                                                                                                           |
| scI0066973.1 60-S    | 21.1028 | 1.67 | Mrps18b       | NM 025878.1 | Mus musculus mitochondrial ribosomal protein S18B (Mrps18b), mRNA.                                                                                                       |
| scI020926.1 330-S    | 21.076  | 1.27 | Supt6h        | NM 009297.1 | Mus musculus suppressor of Ty 6 homolog (S. cerevisiae) (Supt6h), mRNA.                                                                                                  |
| scI0098366.1 13-S    | 21.0581 | 1.39 | Smap1         | NM 028534.1 | Mus musculus stromal membrane-associated protein 1 (Smap1), mRNA.                                                                                                        |
| scI38713.11.10 6-S   | 21.0062 | 1.27 | Bsg           | NM 009768.1 | Mus musculus basigin (Bsg), mRNA.                                                                                                                                        |
| scI29584.3 468-S     | 21.0034 | 1.24 | Zfp637        | NM 177684.2 |                                                                                                                                                                          |
| scI30348.4.1 28-S    | 20.9961 | 1.73 | Lsm8          | NM 133939.1 | Mus musculus LSM8 homolog, U6 small nuclear RNA associated (S. cerevisiae) (Lsm8), mRNA.                                                                                 |
| scI00048.1 13-S      | 20.9943 | 1.4  | Sirt3         | NM 022433   | Mus musculus sirtuin 3 (silent mating type information regulation 2, homolog) 3 (S. cerevisiae) (Sirt3), mRNA.                                                           |
| scI078090.2 4-S      | 20.9427 | 2.99 | Golgb1        | XM 148244.4 |                                                                                                                                                                          |
| scI0003793.1 0-S     | 20.9384 | 2.9  | Metap2        | NM 019648.2 | Mus musculus methionine aminopeptidase 2 (Metap2), mRNA.                                                                                                                 |
| scI51145.31.1 12-S   | 20.9348 | 3.34 | Pde10a        | NM 011866.1 | Mus musculus phosphodiesterase 10A (Pde10a), mRNA.                                                                                                                       |
| scI0014863.1 0-S     | 20.9226 | 2.58 | Gstm2         | NM 008183.2 | Mus musculus glutathione S-transferase, mu 2 (Gstm2), mRNA.                                                                                                              |
| scI070153.1 299-S    | 20.904  | 3.57 | 2210016F16Rik | XM 354755.1 | Mus musculus RIKEN cDNA 2210016F16 gene (2210016F16Rik), mRNA.                                                                                                           |
| scI45409.11 50-S     | 20.899  | 1.32 | Gulo          | NM 178747.2 | Mus musculus gulonolactone (L-) oxidase (Gulo), mRNA.                                                                                                                    |
| scI000989.1 15-S     | 20.8808 | 2.23 | sty           | U21209      |                                                                                                                                                                          |
| scI016418.1 114-S    | 20.8654 | 1.48 | Irgb4bp       | NM 010579.1 | Mus musculus integrin beta 4 binding protein (Irgb4bp), mRNA.                                                                                                            |
| scI00319513.1 270-S  | 20.8547 | 2.55 | A930025D01Rik | NM 178762.2 | Mus musculus RIKEN cDNA A930025D01 gene (A930025D01Rik), mRNA.                                                                                                           |
| scI0103554.4 30-S    | 20.8449 | 1.28 | Psme4         | NM 134013.2 | Mus musculus proteasome (prosome, macropain) activator subunit 4 (Psme4), mRNA.                                                                                          |
| scI027096.1 199-S    | 20.8354 | 1.25 | Trappc3       | NM 013718.2 | Mus musculus trafficking protein particle complex 3 (Trappc3), mRNA.                                                                                                     |
| scI25637.7 145-S     | 20.832  | 1.52 | Ttpa          | NM 015767.1 | Mus musculus tocopherol (alpha) transfer protein (Ttpa), mRNA.                                                                                                           |
| scI0001527.1 23-S    | 20.8271 | 2.24 | Sat2          | XM 181304.3 | Mus musculus spermidine/spermine N1-acetyl transferase 2 (Sat2), mRNA.                                                                                                   |
| scI0231571.13 44-S   | 20.8159 | 1.49 | AW060207      | NM 144911.1 | Mus musculus expressed sequence AW060207 (AW060207), mRNA.                                                                                                               |
| scI44578.8.1 13-S    | 20.8059 | 1.29 | Cetn3         | NM 007684.2 | Mus musculus centrin 3 (Cetn3), mRNA.                                                                                                                                    |
| scI25735.19 37-S     | 20.7991 | 5.73 | Hsp105        | NM 013559.1 | Mus musculus heat shock protein 105 (Hsp105), mRNA.                                                                                                                      |
| scI49191.18.1 6-S    | 20.7966 | 2.19 | Sema5b        | XM 147227.1 | Mus musculus sema domain, seven thrombospondin repeats (type 1 and type 1-like), transmembrane domain (TM) and short cytoplasmic domain, (semaphorin) 5B (Sema5b), mRNA. |
| scI021783.10 20-S    | 20.7962 | 3.17 | A330080J22Rik | NM 178667.2 |                                                                                                                                                                          |
| scI00213484.2 217-S  | 20.7734 | 1.6  | BC036718      | NM 153136.1 | Mus musculus cDNA sequence BC036718 (BC036718), mRNA.                                                                                                                    |
| scI29246.24.1 18-S   | 20.7555 | 1.96 | Aass          | NM 013930.2 | Mus musculus aminoacidpate-semialdehyde synthase (Aass), mRNA.                                                                                                           |
| scI0001867.1 58-S    | 20.7268 | 1.56 | Sfrs10        | NM 009186   | Mus musculus splicing factor, arginine/serine-rich 10 (transformer 2 homolog, Drosophila) (Sfrs10), mRNA.                                                                |
| scI22085.6.1 94-S    | 20.7199 | 1.44 | Rarres1       | XM 130987.3 |                                                                                                                                                                          |
| scI34048.16.227 13-S | 20.6888 | 3.34 | Cdc16         | NM 027276.1 | Mus musculus CDC16 cell division cycle 16 homolog (S. cerevisiae) (Cdc16), mRNA.                                                                                         |
| scI018221.7 88-S     | 20.6876 | 1.78 | Nudc          | NM 010948.1 | Mus musculus nuclear distribution gene C homolog (Aspergillus) (Nudc), mRNA.                                                                                             |
| scI46411.5.1 45-S    | 20.6633 | 1.53 | 1810009H17Rik | XM 283205.1 |                                                                                                                                                                          |
| scI0002178.1 304-S   | 20.6264 | 1.32 | 2010005A06Rik | NM 029357.2 | Mus musculus RIKEN cDNA 2010005A06 gene (2010005A06Rik), mRNA.                                                                                                           |
| scI24984.5.1 10-S    | 20.6143 | 1.61 | BC023823      | NM 153566.1 | Mus musculus cDNA sequence BC023823 (BC023823), mRNA.                                                                                                                    |
| scI022770.1 29-S     | 20.5992 | 1.55 | Zhx1          | NM 009572.2 | Mus musculus zinc fingers and homeoboxes protein 1 (Zhx1), mRNA.                                                                                                         |
| scI0067554.2 226-S   | 20.5979 | 2.62 | Slc25a30      | NM 026232.1 |                                                                                                                                                                          |
| scI0266632.2 59-S    | 20.5961 | 2.27 | Irak4         | NM 029926.3 | Mus musculus interleukin-1 receptor-associated kinase 4 (Irak4), mRNA.                                                                                                   |
| scI32610.6.1 5-S     | 20.5817 | 2.26 | 6430529G09Rik | NM 178706.2 | Mus musculus RIKEN cDNA 6430529G09 gene (6430529G09Rik), mRNA.                                                                                                           |
| scI23003.7.28 144-S  | 20.5608 | 1.23 | 0610031J06Rik | NM 020003.1 | Mus musculus RIKEN cDNA 0610031J06 gene (0610031J06Rik), mRNA.                                                                                                           |
| scI0002068.1 1-S     | 20.5459 | 2.14 | Casp6         | NM 009811.2 | Mus musculus caspase 6 (Casp6), mRNA.                                                                                                                                    |
| scI21752.24.8 3-S    | 20.5056 | 1.29 | Atp1a1        | NM 144900.1 | Mus musculus ATPase, Na <sup>+</sup> /K <sup>+</sup> transporting, alpha 1 polypeptide (Atp1a1), mRNA.                                                                   |
| scI067072.6 68-S     | 20.4957 | 1.42 | Cdc37l        | NM 025950.1 |                                                                                                                                                                          |
| scI28971.3 6-S       | 20.4861 | 2.79 | Temt          | NM 009349   | Mus musculus thioether S-methyltransferase (Temt), mRNA.                                                                                                                 |
| scI49589.13.8 8-S    | 20.4719 | 1.4  | 2810036L13Rik | NM 144802.2 | Mus musculus RIKEN cDNA 2810036L13 gene (2810036L13Rik), mRNA.                                                                                                           |
| scI069202.1 161-S    | 20.4615 | 1.71 | 2610009E16Rik | XM 355811   | Mus musculus RIKEN cDNA 2610009E16 gene (2610009E16Rik), mRNA.                                                                                                           |
| scI066469.2 10-S     | 20.4384 | 1.75 | 2810405K02Rik | NM 025582.2 | Mus musculus RIKEN cDNA 2810405K02 gene (2810405K02Rik), mRNA.                                                                                                           |
| scI0003593.1 5-S     | 20.4295 | 2.39 | Armc8         | NM 028768.1 |                                                                                                                                                                          |
| scI0001455.1 38-S    | 20.4253 | 1.82 | Slc25a11      | NM 024211.2 | Mus musculus solute carrier family 25 (mitochondrial carrier; oxoglutarate carrier), member 11 (Slc25a11), mRNA.                                                         |

| scl0003843.1                                                  | 1-S        | 20.4093     | 2.75     | Dcn           | NM_007833.1   | Mus musculus decorin (Dcn), mRNA.                                                                                               |                                                                |
|---------------------------------------------------------------|------------|-------------|----------|---------------|---------------|---------------------------------------------------------------------------------------------------------------------------------|----------------------------------------------------------------|
| scl25601.18                                                   | 410-S      | 20.3956     | 1.64     | Map3k7        | NM_172688.1   | Mus musculus mitogen activated protein kinase kinase kinase 7 (Map3k7), mRNA.                                                   |                                                                |
| scl0002552.1                                                  | 594-S      | 20.3908     | 1.21     | Triobp        | NM_138579.2   | Mus musculus TRIO and F-actin binding protein (Triobp), mRNA.                                                                   |                                                                |
| scl00235315.2                                                 | 221-S      | 20.3613     | 1.73     | D130054N24Rik | NM_178709.2   | Mus musculus RIKEN cDNA D130054N24 gene (D130054N24Rik), mRNA.                                                                  |                                                                |
| scl0015516.2                                                  | 121-S      | 20.3242     | 1.69     | Hspcb         | NM_008302.2   | Mus musculus heat shock protein 1, beta (Hspcb), mRNA.                                                                          |                                                                |
| scl0003223.1                                                  | 29-S       | 20.3112     | 1.77     | Mrrf          | NM_026422.1   | Mus musculus mitochondrial ribosome recycling factor (Mrrf), mRNA.                                                              |                                                                |
| scl0002832.1                                                  | 59-S       | 20.301      | 1.73     | Ptp4a2        | NM_008974.2   | Mus musculus protein tyrosine phosphatase 4a2 (Ptp4a2), mRNA.                                                                   |                                                                |
| scl52458.4                                                    | 47-S       | 20.2867     | 1.25     | Slc25a28      | NM_145156.1   | Mus musculus solute carrier family 25, member 28 (Slc25a28), mRNA.                                                              |                                                                |
| scl15896.3                                                    | 346-S      | 20.2691     | 5.06     | Grem2         | NM_011825.1   |                                                                                                                                 |                                                                |
| scl33916.7                                                    | 57-S       | 20.2512     | 1.25     | 1810045K07Rik | NM_026432.2   | Mus musculus RIKEN cDNA 1810045K07 gene (1810045K07Rik), mRNA.                                                                  |                                                                |
| scl42862.16                                                   | 16-S       | 20.2377     | 3.49     | Cpsf2         | NM_016856.2   | Mus musculus cleavage and polyadenylation specific factor 2 (Cpsf2), mRNA.                                                      |                                                                |
| scl015040.2                                                   | 130-S      | 20.2297     | 1.32     | H2-T23        | NM_010398     | Mus musculus histocompatibility 2, T region locus 23 (H2-T23), mRNA.                                                            |                                                                |
| scl24881.12.1                                                 | 60-S       | 20.2191     | 1.45     | Nrbf1         | NM_025297.1   | Mus musculus nuclear receptor binding factor 1 (Nrbf1), mRNA.                                                                   |                                                                |
| scl35396.14.1                                                 | 38-S       | 20.1006     | 1.71     | Acy1          | NM_025371.1   | Mus musculus aminocyclase 1 (Acy1), mRNA.                                                                                       |                                                                |
| scl0014007.1                                                  | 233-S      | 20.0757     | 1.66     | Cugbp2        | NM_010160.1   | Mus musculus CUG triplet repeat, RNA binding protein 2 (Cugbp2), mRNA.                                                          |                                                                |
| scl066079.4                                                   | 60-S       | 20.0686     | 1.31     | 0610027O18Rik | NM_025339.2   | Mus musculus RIKEN cDNA 0610027O18 gene (0610027O18Rik), mRNA.                                                                  |                                                                |
| scl0067444.2                                                  | 48-S       | 20.0671     | 1.29     | 0710007A14Rik | NM_023343.1   | Mus musculus RIKEN cDNA 0710007A14 gene (0710007A14Rik), mRNA.                                                                  |                                                                |
| scl33531.19                                                   | 441-S      | 20.0415     | 1.41     | Cyld          | NM_173369.1   | Mus musculus cylindromatosis (turban tumor syndrome) (Cyld), mRNA.                                                              |                                                                |
| scl21165.1.12                                                 | 85-S       | 20.0112     | 8.55     | Bmyc          | NM_023326     | Mus musculus brain expressed myelocytomatosis oncogene (Bmyc), mRNA.                                                            |                                                                |
| scl0016923.1                                                  | 194-S      | 20.006      | 1.37     | Lnk           | NM_008507.2   | Mus musculus linker of T-cell receptor pathways (Lnk), mRNA.                                                                    |                                                                |
| <b>GENES DOWN-REGULATED BY THE ATHEROGENIC DIET IN LIVERS</b> |            |             |          |               |               |                                                                                                                                 |                                                                |
| TargetID                                                      | Diff_Score | Fold_Change | Symbol   | Accession     | Definition    |                                                                                                                                 |                                                                |
| scl0002105.1                                                  | 331-S      | -338.8377   | -69.04   | Kcnn3         | XM_147305.1   | Mus musculus potassium intermediate/small conductance calcium-activated channel, subfamily N, member 3 (Kcnn3), mRNA.           |                                                                |
| scl0001.1                                                     | 3-S        | -336.6852   | -8.98    | 9130229H14Rik | XM_135706.3   | Mus musculus RIKEN cDNA 9130229H14 gene (9130229H14Rik), mRNA.                                                                  |                                                                |
| scl015204.23                                                  | 217-S      | -322.8666   | -5.29    | Herc2         | NM_010418.1   | Mus musculus hect (homologous to the E6-AP (UBE3A) carboxyl terminus) domain and RCC1 (CHC1)-like domain (RLD) 2 (Herc2), mRNA. |                                                                |
| scl43919.15.1                                                 | 45-S       | -260.9584   | -4.89    | Ddx41         | NM_134059.1   | Mus musculus DEAD (Asp-Glu-Ala-Asp) box polypeptide 41 (Ddx41), mRNA.                                                           |                                                                |
| scl020382.2                                                   | 66-S       | -252.3905   | -3.04    | Sfrs2         | NM_011358.1   | Mus musculus splicing factor, arginine/serine-rich 2 (SC-35) (Sfrs2), mRNA.                                                     |                                                                |
| scl000233.1                                                   | 72-S       | -167.5482   | -3.76    | Bcl2l12       | NM_029410.1   | Mus musculus BCL2-like 12 (proline rich) (Bcl2l12), mRNA.                                                                       |                                                                |
| scl00094.1                                                    | 14-S       | -152.7796   | -2       | Hpn           | NM_008281.1   | Mus musculus hepsin (Hpn), mRNA.                                                                                                |                                                                |
| scl078779.1                                                   | 155-S      | -150.1237   | -3       | 2610039E05Rik | NM_030176.2   | Mus musculus RIKEN cDNA 2610039E05 gene (2610039E05Rik), mRNA.                                                                  |                                                                |
| scl0001670.1                                                  | 34-S       | -139.8516   | -3.64    | Cbs           | NM_144855.1   | Mus musculus cystathionine beta-synthase (Cbs), transcript variant 1, mRNA.                                                     |                                                                |
| scl0003961.1                                                  | 4-S        | -134.7176   | -7.89    | Cdkl2         | NM_016912.1   | Mus musculus cyclin-dependent kinase-like 2 (CDC2-related kinase) (Cdkl2), mRNA.                                                |                                                                |
| scl0003591.1                                                  | 99-S       | -134.4637   | -2.32    | Keap1         | NM_016679.2   | Mus musculus kelch-like ECH-associated protein 1 (Keap1), mRNA.                                                                 |                                                                |
| scl0016570.1                                                  | 92-S       | -132.5514   | -23.66   | Kif3c         | NM_008445.1   | Mus musculus kinesin family member 3C (Kif3c), mRNA.                                                                            |                                                                |
| scl46590.24                                                   | 108-S      | -122.3603   | -2.24    | Sec24c        | NM_172596.1   |                                                                                                                                 |                                                                |
| scl0013688.1                                                  | 69-S       | -120.4288   | -3.19    | Eif4ebp2      | NM_010124.1   | Mus musculus eukaryotic translation initiation factor 4E binding protein 2 (Eif4ebp2), mRNA.                                    |                                                                |
| scl00225339.2                                                 | 67-S       | -118.952    | -1.88    | E230022H04Rik | NM_153515.2   | Mus musculus RIKEN cDNA E230022H04 gene (E230022H04Rik), mRNA.                                                                  |                                                                |
| scl000274.1                                                   | 354-S      | -112.5034   | -2.03    | Tnrc6         | NM_144925.2   | Mus musculus trinucleotide repeat containing 6 (Tnrc6), mRNA.                                                                   |                                                                |
| scl0241638.1                                                  | 112-S      | -100.6696   | -1.88    | Prosapip1     | NM_197945.2   | Mus musculus ProSAPIP1 protein (Prosapip1), mRNA.                                                                               |                                                                |
| scl46996.5.2                                                  | 2-S        | -100.2137   | -14.2    | Pvalb         | NM_013645.2   |                                                                                                                                 |                                                                |
| scl52906.7.1                                                  | 110-S      | -100.1966   | -2.07    | Vegfb         | NM_011697.1   | Mus musculus vascular endothelial growth factor B (Vegfb), mRNA.                                                                |                                                                |
| scl21063.24                                                   | 624-S      | -98.0146    | -1.74    | Golga2        | NM_133852.1   | Mus musculus golgi autoantigen, golgin subfamily a, 2 (Golga2), mRNA.                                                           |                                                                |
| scl45859.16.1                                                 | 70-S       | -96.3327    | -1.94    | 5730461K03Rik | NM_027475.1   | Mus musculus RIKEN cDNA 5730461K03 gene (5730461K03Rik), mRNA.                                                                  |                                                                |
| scl014661.15                                                  | 41-S       | -94.8377    | -1.58    | Glud1         | NM_008133.2   |                                                                                                                                 |                                                                |
| scl36214.3                                                    | 394-S      | -88.1682    | -1.91    | Gbif          | NM_019683.2   | Mus musculus globin inducing factor, fetal (Gbif), mRNA.                                                                        |                                                                |
| scl29749.21.1                                                 | 4-S        | -86.968     | -1.59    | Fthtd         | NM_027406.1   | Mus musculus formyltetrahydrofolate dehydrogenase (Fthtd), mRNA.                                                                |                                                                |
| scl052120.1                                                   | 108-S      | -85.7551    | -1.55    | D8Erd354e     | NM_133970     | Mus musculus DNA segment, Chr 8, ERATO Doi 354, expressed (D8Erd354e), mRNA.                                                    |                                                                |
| scl48906.7.1                                                  | 24-S       | -85.4812    | -12.27   | 4930590A17Rik | XM_148730.1   | Mus musculus RIKEN cDNA 4930590A17 gene (4930590A17Rik), mRNA.                                                                  |                                                                |
| scl0071752.2                                                  | 61-S       | -85.4363    | -1.84    | Gtf3c2        | NM_027901.1   |                                                                                                                                 |                                                                |
| scl50076.19.1                                                 | 35-S       | -85.0709    | -1.99    | Cbs           | NM_144855.1   | Mus musculus cystathionine beta-synthase (Cbs), transcript variant 1, mRNA.                                                     |                                                                |
| scl37031.1                                                    | 4-S        | -83.2238    | -5.1     | Bcl9l         | NM_030256.1   | Mus musculus B-cell CLL/lymphoma 9-like (Bcl9l), mRNA.                                                                          |                                                                |
| scl44033.1                                                    | 1176       | 137-S       | -82.2412 | -8.37         | 2900016G23Rik | XM_147738.1                                                                                                                     | Mus musculus RIKEN cDNA 2900016G23 gene (2900016G23Rik), mRNA. |
| scl21077.16.1                                                 | 122-S      | -81.3408    | -15.99   | BC034076      | NM_177649.3   | Mus musculus cDNA sequence BC034076 (BC034076), mRNA.                                                                           |                                                                |
| scl39936.8.1                                                  | 29-S       | -79.9242    | -1.81    | Serpinf2      | NM_008878.1   | Mus musculus serine (or cysteine) proteinase inhibitor, clade F, member 2 (Serpinf2), mRNA.                                     |                                                                |
| scl29407.39.1                                                 | 52-S       | -79.4838    | -2.44    | Pik3c2g       | NM_011084     | Mus musculus phosphatidylinositol 3-kinase, C2 domain containing, gamma polypeptide (Pik3c2g), transcript variant 2, mRNA.      |                                                                |
| scl0230857.22                                                 | 98-S       | -78.1303    | -1.64    | Ece1          | NM_199307.1   | Mus musculus endothelin converting enzyme 1 (Ece1), mRNA.                                                                       |                                                                |



|                       |          |        |               |             |                                                                                                              |
|-----------------------|----------|--------|---------------|-------------|--------------------------------------------------------------------------------------------------------------|
| sci26582.30.1 36-S    | -78.0537 | -2.13  | 2310045A20Rik | NM 172710.1 | Mus musculus RIKEN cDNA 2310045A20 gene (2310045A20Rik), mRNA.                                               |
| sci33472.9.1 1-S      | -76.597  | -1.58  | 2310005O14Rik | NM 026452   | Mus musculus RIKEN cDNA 2310005O14 gene (2310005O14Rik), mRNA.                                               |
| sci0004096.1 49-S     | -76.5573 | -2.41  | Trfr2         | NM 015799.2 | Mus musculus transferrin receptor 2 (Trfr2), mRNA.                                                           |
| sci0192166.3 30-S     | -75.265  | -1.87  | Sardh         | NM 138665.1 | Mus musculus sarcosine dehydrogenase (Sardh), mRNA.                                                          |
| sci34521.8.1 20-S     | -75.1718 | -2.27  | BC004022      | XM 134557.1 | Mus musculus cDNA sequence BC004022 (BC004022), mRNA.                                                        |
| sci39361.6 168-S      | -75.0843 | -1.92  | Cdc42ep4      | NM 020006.1 | Mus musculus CDC42 effector protein (Rho GTPase binding) 4 (Cdc42ep4), mRNA.                                 |
| sci0227648.1 142-S    | -73.029  | -1.64  | AU024582      | NM 153125.1 | Mus musculus expressed sequence AU024582 (AU024582), mRNA.                                                   |
| sci0050907.2 191-S    | -72.3812 | -1.68  | Preb          | NM 016703.1 | Mus musculus prolactin regulatory element binding (Preb), mRNA.                                              |
| sci015586.4 7-S       | -72.0823 | -2.48  | Hyal1         | NM 008317.2 | Mus musculus hyaluronidase 1 (Hyal1), mRNA.                                                                  |
| sci32698.6.1 30-S     | -71.6796 | -1.5   | Irf3          | NM 016849.2 | Mus musculus interferon regulatory factor 3 (Irf3), mRNA.                                                    |
| sci0001280.1 1-S      | -69.547  | -1.65  | Pcyt2         | NM 024229.2 | Mus musculus phosphate cytidyltransferase 2, ethanolamine (Pcyt2), mRNA.                                     |
| sci068035.2 9-S       | -69.0257 | -2.94  | 3100004P22Rik | NM 133693.1 | Mus musculus RIKEN cDNA 3100004P22 gene (3100004P22Rik), mRNA.                                               |
| sci0016987.2 34-S     | -68.8042 | -3.19  | Lss           | NM 146006   | Mus musculus lanosterol synthase (Lss), mRNA.                                                                |
| sci054325.6 160-S     | -68.4706 | -2.34  | Elov1         | NM 019422.1 | Mus musculus elongation of very long chain fatty acids (FEN1/Elo2, SUR4/Elo3, yeast)-like 1 (Elov1), mRNA.   |
| sci51123.11.1 42-S    | -67.8131 | -13.44 | Slc22a2       | NM 013667.1 | Mus musculus solute carrier family 22 (organic cation transporter), member 2 (Slc22a2), mRNA.                |
| sci000480.1 1346-S    | -67.5859 | -11.29 | C630029K18Rik | NM 144871.2 | Mus musculus RIKEN cDNA C630029K18 gene (C630029K18Rik), mRNA.                                               |
| sci46309.9 175-S      | -67.5534 | -1.94  | Abhd4         | NM 134076.1 | Mus musculus abhydrolase domain containing 4 (Abhd4), mRNA.                                                  |
| sci0077683.1 104-S    | -67.4394 | -2.31  | Ehmt1         | NM 172545.1 |                                                                                                              |
| sci0078920.2 103-S    | -66.9032 | -1.49  | Dlst          | NM 030225.3 | Mus musculus dihydroilipoamide S-succinyltransferase (E2 component of 2-oxo-glutarate complex) (Dlst), mRNA. |
| sci050880.12 63-S     | -66.7111 | -1.65  | Scly          | NM 016717.2 | Mus musculus selenocysteine lyase (Scly), mRNA.                                                              |
| sci027041.12 171-S    | -66.6061 | -1.67  | G3bp          | NM 013716   | Mus musculus Ras-GTPase-activating protein SH3-domain binding protein (G3bp), mRNA.                          |
| sci014673.1 90-S      | -66.4029 | -5.15  | Gna12         | NM 010302.1 | Mus musculus guanine nucleotide binding protein, alpha 12 (Gna12), mRNA.                                     |
| sci54754.6.1 12-S     | -65.9046 | -1.54  | Igbb1         | XM 196586.3 | Mus musculus immunoglobulin (CD79A) binding protein 1 (Igbb1), mRNA.                                         |
| sci38366.14 414-S     | -63.5984 | -1.83  | Gns           | NM 029364.1 | Mus musculus glucosamine (N-acetyl)-6-sulfatase (Gns), mRNA.                                                 |
| sci32855.14.1 3-S     | -63.4595 | -1.48  | Hnrpl         | NM 177301.3 | Mus musculus heterogeneous nuclear ribonucleoprotein L (Hnrpl), mRNA.                                        |
| sci0018571.2 141-S    | -62.2229 | -4.54  | Pdcd6ip       | NM 011052.1 | Mus musculus programmed cell death 6 interacting protein (Pdcd6ip), mRNA.                                    |
| sci0077038.2 139-S    | -61.7089 | -1.97  | Zfp289        | NM 023854.1 | Mus musculus zinc finger protein 289 (Zfp289), mRNA.                                                         |
| sci0219140.10 154-S   | -61.5436 | -1.6   | Spata13       | XM 147847.4 |                                                                                                              |
| sci53371.28 117-S     | -61.1168 | -1.44  | Ddb1          | NM 015735.1 | Mus musculus damage specific DNA binding protein 1 (Ddb1), mRNA.                                             |
| sci0227570.7 253-S    | -60.7373 | -1.92  | 2810455F06Rik | XM 130011.5 | Mus musculus RIKEN cDNA 2810455F06 gene (2810455F06Rik), mRNA.                                               |
| sci072090.10 13-S     | -60.6883 | -1.71  | Entpd8        | XM 203832.2 | Mus musculus ectonucleoside triphosphate diphosphohydrolase 6 (Entpd8), mRNA.                                |
| sci0023881.1 86-S     | -59.7832 | -1.51  | E430034L04Rik | NM 011816.2 | Mus musculus RIKEN cDNA E430034L04 gene (E430034L04Rik), mRNA.                                               |
| sci39304.10.1 23-S    | -59.658  | -2.04  | Prpsap1       | XM 181343.1 |                                                                                                              |
| sci21181.13 417-S     | -59.3177 | -1.7   | E430019H13Rik | XM 30073.3  |                                                                                                              |
| sci15914.2 382-S      | -58.9698 | -2.69  | Dusp23        | XM 129566   |                                                                                                              |
| sci015235.16 24-S     | -58.8242 | -1.65  | Mst1          | NM 008243.2 | Mus musculus macrophage stimulating 1 (hepatocyte growth factor-like) (Mst1), mRNA.                          |
| sci066193.1 138-S     | -58.1146 | -1.47  | 1110049F12Rik | NM 025411.2 | Mus musculus RIKEN cDNA 1110049F12 gene (1110049F12Rik), mRNA.                                               |
| sci0004207.1 37-S     | -56.9116 | -1.98  | Fastk         | NM 023229.1 | Mus musculus Fas-activated serine/threonine kinase (Fastk), mRNA.                                            |
| sci39617.28.1 49-S    | -56.6631 | -1.63  | Thrap4        | NM 011869.1 | Mus musculus thyroid hormone receptor associated protein 4 (Thrap4), mRNA.                                   |
| sci0013589.1 127-S    | -56.5365 | -1.7   | Mapre1        | NM 007896.2 | Mus musculus microtubule-associated protein, RP/EB family, member 1 (Mapre1), mRNA.                          |
| sci0015925.2 2-S      | -56.2361 | -1.58  | Ide           | NM 031156.1 | Mus musculus insulin degrading enzyme (Ide), mRNA.                                                           |
| sci27607.17.1 41-S    | -55.7766 | -1.59  | Alb1          | NM 009654.1 | Mus musculus albumin 1 (Alb1), mRNA.                                                                         |
| sci30510.5 349-S      | -55.7634 | -1.61  | Bet1l         | NM 018742.3 | Mus musculus blocked early in transport 1 homolog (S. cerevisiae)-like (Bet1l), mRNA.                        |
| sci0114896.3 29-S     | -55.5304 | -1.51  | Afg3l1        | NM 054070.1 | Mus musculus AFG3(ATPase family gene 3)-like 1 (yeast) (Afg3l1), mRNA.                                       |
| sci52956.24.4 13-S    | -55.3277 | -3.61  | Nfkb2         | NM 019408.1 | Mus musculus nuclear factor of kappa light polypeptide gene enhancer in B-cells 2, p49/p100 (Nfkb2), mRNA.   |
| sci41344.9.1 32-S     | -55.2514 | -1.48  | Asgr2         | NM 007493.2 | Mus musculus asialoglycoprotein receptor 2 (Asgr2), mRNA.                                                    |
| sci49180.5.1 127-S    | -55.1092 | -11.48 | 2010005H15Rik | NM 029733.1 | Mus musculus RIKEN cDNA 2010005H15 gene (2010005H15Rik), mRNA.                                               |
| sci27818.30.1 7-S     | -54.7295 | -2.27  | Anapc4        | NM 024213.1 | Mus musculus anaphase promoting complex subunit 4 (Anapc4), mRNA.                                            |
| sci057261.4 30-S      | -54.6091 | -1.96  | Brd4          | NM 020508.2 | Mus musculus bromodomain containing 4 (Brd4), mRNA.                                                          |
| sci41080.12 669 137-S | -53.1    | -1.73  | 4732452J19Rik | NM 172448.1 | Mus musculus RIKEN cDNA 4732452J19 gene (4732452J19Rik), mRNA.                                               |
| sci013864.1 5-S       | -52.8686 | -1.43  | Nr2f6         | NM 010150   | Mus musculus nuclear receptor subfamily 2, group F, member 6 (Nr2f6), mRNA.                                  |
| sci020849.21 14-S     | -52.855  | -9.84  | Stat4         | NM 011487.1 | Mus musculus signal transducer and activator of transcription 4 (Stat4), mRNA.                               |
| sci019182.11 5-S      | -52.743  | -1.44  | Psmc3         | NM 008948.1 | Mus musculus proteasome (prosome, macropain) 26S subunit, ATPase 3 (Psmc3), mRNA.                            |
| sci011512.2 0-S       | -52.7201 | -3.58  | Adcy6         | NM 007405.1 | Mus musculus adenylate cyclase 6 (Adcy6), mRNA.                                                              |
| sci0013629.1 11-S     | -52.4501 | -1.51  | Eef2          | NM 007907.1 | Mus musculus eukaryotic translation elongation factor 2 (Eef2), mRNA.                                        |
| sci19160.22 222-S     | -52.2361 | -1.57  | Tik1          | NM 172664.2 | Mus musculus tousled-like kinase 1 (Tik1), mRNA.                                                             |

|               |        |          |        |               |             |                                                                                                  |
|---------------|--------|----------|--------|---------------|-------------|--------------------------------------------------------------------------------------------------|
| sc127388.28   | 359-S  | -52.1723 | -1.43  | Ube3b         | NM_054093.1 | Mus musculus ubiquitin protein ligase E3B (Ube3b), mRNA.                                         |
| sc100233908.1 | 1058-S | -51.6149 | -2.18  | Fus           | NM_139149.1 | Mus musculus fusion, derived from t(12;16) malignant liposarcoma (human) (Fus), mRNA.            |
| sc131141.20.4 | 13-S   | -51.3764 | -2.1   | Anpep         | NM_008486.1 | Mus musculus alanyl (membrane) aminopeptidase (Anpep), mRNA.                                     |
| sc100235567.1 | 50-S   | -51.0199 | -1.9   | Dnajc13       | XM_135146.4 |                                                                                                  |
| sc10001240.1  | 5-S    | -50.9382 | -10.28 | Tnfrsf1a      | NM_011609.2 | Mus musculus tumor necrosis factor receptor superfamily, member 1a (Tnfrsf1a), mRNA.             |
| sc142954.11   | 322-S  | -50.8258 | -1.83  | BC011209      | NM_145447.1 | Mus musculus cDNA sequence BC011209 (BC011209), mRNA.                                            |
| sc1072462.6   | 25-S   | -50.5643 | -2.69  | 2600005C20Rik | NM_028244.1 | Mus musculus RIKEN cDNA 2600005C20 gene (2600005C20Rik), mRNA.                                   |
| sc123013.4.1  | 25-S   | -49.9953 | -7.27  | Crabp2        | NM_007759.1 | Mus musculus cellular retinoic acid binding protein II (Crabp2), mRNA.                           |
| sc1098999.1   | 128-S  | -49.4987 | -2.24  | AI481105      | XM_130703.4 | Mus musculus expressed sequence AI481105 (AI481105), mRNA.                                       |
| sc10002696.1  | 5-S    | -49.4033 | -2.22  | Oprs1         | NM_011014.1 | Mus musculus opioid receptor, sigma 1 (Oprs1), mRNA.                                             |
| sc10019294.1  | 121-S  | -49.382  | -1.75  | Pvrl2         | NM_008990.2 | Mus musculus poliovirus receptor-related 2 (Pvrl2), mRNA.                                        |
| sc10002699.1  | 4-S    | -49.2162 | -1.52  | Nol6          | NM_139237.1 | Mus musculus nucleolar protein family 6 (RNA-associated) (Nol6), transcript variant alpha, mRNA. |
| sc149146.12.1 | 4-S    | -48.9455 | -1.78  | 2610033C09Rik | NM_026407.2 | Mus musculus RIKEN cDNA 2610033C09 gene (2610033C09Rik), mRNA.                                   |
| sc142553.13   | 222-S  | -48.9096 | -1.39  | Hbp1          | NM_153198   | Mus musculus high mobility group box transcription factor 1 (Hbp1), mRNA.                        |
| sc1013629.6   | 24-S   | -48.7012 | -1.69  | Eef2          | NM_007907.1 | Mus musculus eukaryotic translation elongation factor 2 (Eef2), mRNA.                            |
| sc10002409.1  | 31-S   | -48.5304 | -6.26  | Dio2          | NM_010050.1 | Mus musculus deiodinase, iodothyronine, type II (Dio2), mRNA.                                    |
| sc10069219.2  | 49-S   | -48.5246 | -3.36  | Ddah1         | NM_026993.1 | Mus musculus dimethylarginine dimethylaminohydrolase 1 (Ddah1), mRNA.                            |
| sc1068505.1   | 329-S  | -48.508  | -1.78  | 1110014N23Rik | XM_283543.2 |                                                                                                  |
| sc10001809.1  | 7-S    | -48.476  | -9.5   | Dlgh1         | NM_007862.2 | Mus musculus discs, large homolog 1 (Drosophila) (Dlgh1), mRNA.                                  |
| sc153116.10   | 62-S   | -48.1469 | -1.45  | Pi4k2a        | NM_145501.1 | Mus musculus phosphatidylinositol 4-kinase type 2 alpha (Pi4k2a), mRNA.                          |
| sc1077038.16  | 27-S   | -47.9241 | -2.09  | Zfp289        | NM_023854.1 | Mus musculus zinc finger protein 289 (Zfp289), mRNA.                                             |
| sc147431.10   | 195-S  | -47.3428 | -1.65  | AW549877      | NM_145930   | Mus musculus expressed sequence AW549877 (AW549877), mRNA.                                       |
| sc125784.5.1  | 54-S   | -47.2067 | -1.46  | Pdap1         | XM_132501.2 | Mus musculus PDGFA associated protein 1 (Pdap1), mRNA.                                           |
| sc131481.11   | 594-S  | -46.7405 | -1.66  | 2700023B17Rik | NM_025948.1 | Mus musculus RIKEN cDNA 2700023B17 gene (2700023B17Rik), mRNA.                                   |
| sc100224613.2 | 5-S    | -46.3405 | -2.52  | E030034P13Rik | NM_153791.1 | Mus musculus RIKEN cDNA E030034P13 gene (E030034P13Rik), mRNA.                                   |
| sc1071774.7   | 27-S   | -46.2024 | -1.96  | 1300007L22Rik | NM_027917.1 | Mus musculus RIKEN cDNA 1300007L22 gene (1300007L22Rik), mRNA.                                   |
| sc1066989.6   | 85-S   | -46.1924 | -10.62 | 2410004N11Rik | NM_025888.2 | Mus musculus RIKEN cDNA 2410004N11 gene (2410004N11Rik), mRNA.                                   |
| sc124607.15   | 131-S  | -46.1205 | -1.74  | Dvl1          | NM_010091.2 | Mus musculus dishevelled, dsh homolog 1 (Drosophila) (Dvl1), mRNA.                               |
| sc10232371.6  | 16-S   | -45.954  | -1.48  | C1r1          | NM_181344.2 | Mus musculus complement component 1, r subcomponent-like (C1r1), mRNA.                           |
| sc140849.10   | 252-S  | -45.9206 | -1.48  | Acbd4         | NM_025988.1 | Mus musculus acyl-Coenzyme A binding domain containing 4 (Acbd4), mRNA.                          |
| sc133214.20.1 | 19-S   | -45.8024 | -1.74  | Spg7          | NM_153176.3 | Mus musculus spastic paraplegia 7 homolog (human) (Spg7), mRNA.                                  |
| sc100110959.1 | 154-S  | -45.7717 | -1.38  | D7Rp2e        | NM_033080.1 | Mus musculus DNA segment, Chr 7, Roswell Park 2 complex, expressed (D7Rp2e), mRNA.               |
| sc134132.19.1 | 1-S    | -45.5647 | -1.54  | Stxbp2        | NM_011503.2 | Mus musculus syntaxin binding protein 2 (Stxbp2), mRNA.                                          |
| sc17782.7.1   | 158-S  | -45.4152 | -1.61  | 1110060O18Rik | NM_026846.1 | Mus musculus RIKEN cDNA 1110060O18 gene (1110060O18Rik), mRNA.                                   |
| sc144251.7.1  | 3-S    | -45.2518 | -4.34  | Stard3nl      | NM_024270.1 | Mus musculus STARD3 N-terminal like (Stard3nl), mRNA.                                            |
| sc145842.16.1 | 36-S   | -44.8443 | -1.79  | Ndst2         | NM_010811.1 | Mus musculus N-deacetylase/N-sulfotransferase (heparan glucosaminyl) 2 (Ndst2), mRNA.            |
| sc139472.24   | 150-S  | -44.7949 | -1.6   | Nsf           | NM_008740.2 | Mus musculus N-ethylmaleimide sensitive fusion protein (Nsf), mRNA.                              |
| sc134974.1.1  | 106-S  | -44.7587 | -9.54  | Adrb3         | NM_013462.1 | Mus musculus adrenergic receptor, beta 3 (Adrb3), mRNA.                                          |
| sc10012606.2  | 178-S  | -44.7546 | -2.55  | Cebpa         | NM_007678.1 | Mus musculus CCAAT/enhancer binding protein (C/EBP), alpha (Cebpa), mRNA.                        |
| sc10018111.2  | 84-S   | -44.4641 | -10.63 | Nnat          | NM_010923.1 | Mus musculus neuronatin (Nnat), transcript variant 2, mRNA.                                      |
| sc10234854.13 | 245-S  | -44.0265 | -1.58  | Cdk10         | NM_194444.1 | Mus musculus cyclin-dependent kinase (CDC2-like) 10 (Cdk10), transcript variant 2, mRNA.         |
| sc152839.2    | 29-S   | -43.5848 | -1.46  | AI837181      | NM_134149.1 | Mus musculus expressed sequence AI837181 (AI837181), mRNA.                                       |
| sc10268417.1  | 220-S  | -43.1845 | -1.41  | Zfp496        | NM_172941   |                                                                                                  |
| sc127224.3.7  | 29-S   | -43.0226 | -1.49  | Arl6ip4       | NM_144509.1 | Mus musculus ADP-ribosylation factor-like 6 interacting protein 4 (Arl6ip4), mRNA.               |
| sc136902.11   | 284-S  | -42.8529 | -2.05  | Scamp2        | NM_022813.2 | Mus musculus secretory carrier membrane protein 2 (Scamp2), mRNA.                                |
| sc100110593.1 | 306-S  | -42.5863 | -9.49  | Prdm2         | XM_204027.3 |                                                                                                  |
| sc100268515.2 | 81-S   | -42.4409 | -7.79  | BC060615      | NM_198423.1 | Mus musculus cDNA sequence BC060615 (BC060615), mRNA.                                            |
| sc100242291.2 | 165-S  | -42.437  | -2.37  | 1110001C20Rik | NM_177730.2 | Mus musculus RIKEN cDNA 1110001C20 gene (1110001C20Rik), mRNA.                                   |
| sc10014571.1  | 161-S  | -42.2736 | -1.75  | Gpd2          | NM_010274.2 | Mus musculus glycerol phosphate dehydrogenase 2, mitochondrial (Gpd2), mRNA.                     |
| sc1023665.1   | 9-S    | -42.2611 | -3.66  | C030006K11Rik | NM_145472.1 | Mus musculus RIKEN cDNA C030006K11 gene (C030006K11Rik), mRNA.                                   |
| sc140257.8.9  | 25-S   | -41.8872 | -2.12  | 0610039K22Rik | NM_025346.1 | Mus musculus RIKEN cDNA 0610039K22 gene (0610039K22Rik), mRNA.                                   |
| sc10001722.1  | 31-S   | -41.8174 | -1.68  | Plg           | NM_008877.2 | Mus musculus plasminogen (Plg), mRNA.                                                            |
| sc10069109.2  | 11-S   | -41.7812 | -1.72  | 1810009O10Rik | NM_197989.1 | Mus musculus RIKEN cDNA 1810009O10 gene (1810009O10Rik), mRNA.                                   |
| sc1080287.9   | 33-S   | -41.7059 | -9.65  | Apobec3       | NM_030255.1 | Mus musculus apolipoprotein B editing complex 3 (Apobec3), mRNA.                                 |
| sc131848.11   | 248-S  | -41.6129 | -2.65  | Dhcr7         | NM_007856.2 | Mus musculus 7-dehydrocholesterol reductase (Dhcr7), mRNA.                                       |
| sc10002836.1  | 427-S  | -41.5653 | -2.53  | Prdm2         | XM_204027.3 |                                                                                                  |

|                     |          |       |               |             |                                                                                                                                               |
|---------------------|----------|-------|---------------|-------------|-----------------------------------------------------------------------------------------------------------------------------------------------|
| scl19818.14.1 56-S  | -41.2061 | -3.28 | Th1l          | NM_020580.1 | Mus musculus TH1-like homolog ( <i>Drosophila</i> ) (Th1l), mRNA.                                                                             |
| scl41270.2 525-S    | -41.1172 | -2.02 | Rtn4r1l       | NM_177708.3 | Mus musculus reticulon 4 receptor-like 1 (Rtn4r1l), mRNA.                                                                                     |
| scl22887.9 86-S     | -40.883  | -1.82 | 4930504E06Rik | NM_133858.2 | Mus musculus RIKEN cDNA 4930504E06 gene (4930504E06Rik), mRNA.                                                                                |
| scl39939.4 200-S    | -40.6535 | -4.95 | Hic1          | NM_010430.1 | Mus musculus hypermethylated in cancer 1 (Hic1), mRNA.                                                                                        |
| scl0029861.1 97-S   | -40.5923 | -8.66 | Neud4         | NM_013874.1 | Mus musculus neuronal d4 domain family member (Neud4), mRNA.                                                                                  |
| scl36804.10.1 24-S  | -40.5438 | -1.56 | Spg21         | NM_138584.1 |                                                                                                                                               |
| scl49387.17.1 22-S  | -40.4406 | -4.78 | Top3b         | NM_011624.2 | Mus musculus topoisomerase (DNA) III beta (Top3b), mRNA.                                                                                      |
| scl49862.18.1 0-S   | -40.3423 | -1.61 | 1200014P03Rik | NM_029091.1 | Mus musculus RIKEN cDNA 1200014P03 gene (1200014P03Rik), mRNA.                                                                                |
| scl0018789.1 2-S    | -40.3187 | -2.08 | Papola        | NM_011112.1 | Mus musculus poly (A) polymerase alpha (Papola), mRNA.                                                                                        |
| scl0068585.2 67-S   | -40.307  | -1.63 | Rtn4          | NM_194054.1 | Mus musculus reticulon 4 (Rtn4), transcript variant 5, mRNA.                                                                                  |
| scl0017274.1 278-S  | -40.2648 | -1.72 | Rab8a         | NM_023126.2 | Mus musculus RAB8A, member RAS oncogene family (Rab8a), mRNA.                                                                                 |
| scl31411.7.1 30-S   | -40.2214 | -1.7  | Nr1h2         | NM_009473   | Mus musculus nuclear receptor subfamily 1, group H, member 2 (Nr1h2), mRNA.                                                                   |
| scl25538.5 299-S    | -40.1828 | -6.24 | Ube2r2        | NM_026275.2 | Mus musculus ubiquitin-conjugating enzyme E2R 2 (Ube2r2), mRNA.                                                                               |
| scl000039.1 11-S    | -40.1632 | -1.95 | BC023957      | NM_172257.1 | Mus musculus cDNA sequence BC023957 (BC023957), mRNA.                                                                                         |
| scl24870.7.1 13-S   | -40.1009 | -1.82 | D030015G18Rik | NM_146155.2 | Mus musculus RIKEN cDNA D030015G18 gene (D030015G18Rik), mRNA.                                                                                |
| scl40925.4.3563 8-S | -40.0849 | -2.38 | 5730509C05Rik | NM_197940.1 |                                                                                                                                               |
| scl0003230.1 8-S    | -39.782  | -2.56 | Fpgs          | NM_010236.1 | Mus musculus folylpolyglutamyl synthetase (Fpgs), mRNA.                                                                                       |
| scl069940.12 93-S   | -39.5057 | -2.06 | 2810407P21Rik | XM_132150.5 |                                                                                                                                               |
| scl34388.19 15-S    | -39.375  | -1.49 | Ranbp10       | NM_145824.3 |                                                                                                                                               |
| scl16275.2 366-S    | -39.373  | -3.34 | Adora1        | NM_009629.1 | Mus musculus adenosine A1 receptor (Adora1), mRNA.                                                                                            |
| scl35577.16.1 50-S  | -39.3402 | -1.35 | Fbxo9         | NM_023605.1 | Mus musculus f-box only protein 9 (Fbxo9), mRNA.                                                                                              |
| scl0114716.6 81-S   | -39.0477 | -3.33 | Spred2        | NM_033523.2 | Mus musculus sprouty protein with EVH-1 domain 2, related sequence (Spred2), mRNA.                                                            |
| scl0001430.1 149-S  | -38.9579 | -1.45 | Nags          | NM_178053.2 | Mus musculus N-acetylglutamate synthase (Nags), mRNA.                                                                                         |
| scl37745.17 21-S    | -38.8482 | -2.02 | Thrap5        | NM_198107.1 | Mus musculus thyroid hormone receptor associated protein 5 (Thrap5), mRNA.                                                                    |
| scl069326.1 76-S    | -38.7117 | -2.02 | C330008K14Rik | XM_128979.4 |                                                                                                                                               |
| scl051792.12 26-S   | -38.5785 | -1.65 | Ppp2r1a       | NM_016891.2 | Mus musculus protein phosphatase 2 (formerly 2A), regulatory subunit A (PR 65), alpha isoform (Ppp2r1a), mRNA.                                |
| scl0001519.1 21-S   | -38.4889 | -1.64 | Syng2         | NM_009304.1 | Mus musculus synaptogyrin 2 (Syng2), mRNA.                                                                                                    |
| scl013424.9 0-S     | -38.1964 | -1.86 | Dnchc1        | NM_030238.1 | Mus musculus dynein, cytoplasmic, heavy chain 1 (Dnchc1), mRNA.                                                                               |
| scl0231103.18 1-S   | -38.1464 | -1.55 | Gckr          | NM_144909   | Mus musculus glucokinase regulatory protein (Gckr), mRNA.                                                                                     |
| scl50930.18 166-S   | -38.1259 | -3.49 | Anks1         | NM_181413.2 | Mus musculus ankyrin repeat and SAM domain containing 1 (Anks1), mRNA.                                                                        |
| scl071452.5 105-S   | -38.1153 | -1.49 | 5530600A18Rik | NM_027799.1 | Mus musculus RIKEN cDNA 5530600A18 gene (5530600A18Rik), mRNA.                                                                                |
| scl0003260.1 9-S    | -38.0335 | -9.39 | Nfatc2        | NM_010899.1 | Mus musculus nuclear factor of activated T-cells, cytoplasmic, calcineurin-dependent 2 (Nfatc2), mRNA.                                        |
| scl22954.14.1 9-S   | -37.9739 | -2.18 | 4632407F12Rik | XM_110709.2 | Mus musculus RIKEN cDNA 4632407F12 gene (4632407F12Rik), mRNA.                                                                                |
| scl0027376.2 9-S    | -37.9614 | -1.44 | Slc25a10      | NM_013770.1 | Mus musculus solute carrier family 25 (mitochondrial carrier; dicarboxylate transporter), member 10 (Slc25a10), mRNA.                         |
| scl066870.7 39-S    | -37.946  | -1.37 | 1200009K13Rik | NM_025814.1 | Mus musculus RIKEN cDNA 1200009K13 gene (1200009K13Rik), mRNA.                                                                                |
| scl20894.20.1 21-S  | -37.821  | -2.71 | Pkp4          | XM_130277.3 | Mus musculus plakophilin 4 (Pkp4), mRNA.                                                                                                      |
| scl19390.3.3 3-S    | -37.5129 | -1.32 | Ndufa8        | NM_026703.1 | Mus musculus NADH dehydrogenase (ubiquinone) 1 alpha subcomplex, 8 (Ndufa8), mRNA.                                                            |
| scl33707.42 67-S    | -37.2831 | -1.43 | Myo9b         | NM_015742.1 | Mus musculus myosin IXb (Myo9b), mRNA.                                                                                                        |
| scl26219.29 122-S   | -37.2607 | -1.6  | Ulk1          | NM_009469.3 | Mus musculus Unc-51 like kinase 1 ( <i>C. elegans</i> ) (Ulk1), mRNA.                                                                         |
| scl39557.17.1 8-S   | -37.2408 | -1.4  | Dnajc7        | NM_019795.3 | Mus musculus DnaJ (Hsp40) homolog, subfamily C, member 7 (Dnajc7), mRNA.                                                                      |
| scl45764.20 72-S    | -36.9214 | -1.41 | Nisch         | NM_022656.1 | Mus musculus nischarin (Nisch), mRNA.                                                                                                         |
| scl066306.4 122-S   | -36.6176 | -2.96 | 2810012G03Rik | NM_175104.3 | Mus musculus RIKEN cDNA 2810012G03 gene (2810012G03Rik), mRNA.                                                                                |
| scl00227334.1 76-S  | -36.3976 | -4.53 | Usp40         | XM_129956.2 |                                                                                                                                               |
| scl0003913.1 65-S   | -36.1995 | -2.22 | Cdk4          | NM_009870.2 | Mus musculus cyclin-dependent kinase 4 (Cdk4), mRNA.                                                                                          |
| scl0074781.2 60-S   | -36.1852 | -1.93 | 2510001110Rik | NM_178398.2 |                                                                                                                                               |
| scl27911.17 304-S   | -36.0663 | -1.46 | Sh3bp2        | NM_011893   | Mus musculus SH3-domain binding protein 2 (Sh3bp2), mRNA.                                                                                     |
| scl21170.7.1 39-S   | -36.0303 | -6.58 | 9230106L18Rik | NM_033145.1 | Mus musculus RIKEN cDNA 9230106L18 gene (9230106L18Rik), mRNA.                                                                                |
| scl51774.11.3 64-S  | -36.0248 | -1.33 | Cxxc1         | NM_028868.1 | Mus musculus CXXC finger 1 (PHD domain) (Cxxc1), mRNA.                                                                                        |
| scl026456.19 173-S  | -35.9376 | -1.8  | Sema4g        | NM_011976.1 | Mus musculus sema domain, immunoglobulin domain (Ig), transmembrane domain (TM) and short cytoplasmic domain, (semaphorin) 4G (Sema4g), mRNA. |
| scl0233870.10 246-S | -35.7815 | -1.43 | Tufm          | NM_172745.1 |                                                                                                                                               |
| scl28277.12 197-S   | -35.7582 | -1.39 | Wbp11         | NM_021714.3 | Mus musculus WW domain binding protein 11 (Wbp11), mRNA.                                                                                      |
| scl0003929.1 0-S    | -35.7466 | -1.47 | ORF61         | XM_109575.3 |                                                                                                                                               |
| scl093760.1 28-S    | -35.6994 | -1.64 | Arid1a        | NM_033566.1 | Mus musculus AT rich interactive domain 1A (Swi1 like) (Arid1a), mRNA.                                                                        |
| scl070302.4 170-S   | -35.6664 | -1.98 | 3110050K21Rik | XM_127780.4 | Mus musculus RIKEN cDNA 3110050K21 gene (3110050K21Rik), mRNA.                                                                                |
| scl43917.11.1 43-S  | -35.5844 | -2.47 | BC021381      | NM_145382.2 | Mus musculus cDNA sequence BC021381 (BC021381), mRNA.                                                                                         |
| scl018220.1 69-S    | -35.4949 | -1.31 | Nucb1         | NM_008749.1 |                                                                                                                                               |

|                     |          |       |               |             |                                                                                                                                               |
|---------------------|----------|-------|---------------|-------------|-----------------------------------------------------------------------------------------------------------------------------------------------|
| scl012013.5 256-S   | -35.4642 | -1.71 | Bach1         | NM_007520.1 | Mus musculus BTB and CNC homology 1 (Bach1), mRNA.                                                                                            |
| scl48388.1.45 188-S | -35.3937 | -1.52 | 2310061J03Rik | XM_148411.1 | Mus musculus RIKEN cDNA 2310061J03 gene (2310061J03Rik), mRNA.                                                                                |
| scl0018045.2 49-S   | -35.0885 | -1.61 | Nfyb          | NM_010914.1 | Mus musculus nuclear transcription factor-Y beta (Nfyb), mRNA.                                                                                |
| scl36629.23.1 130-S | -35.0727 | -4.8  | Adams7        | XM_135041.5 | Mus musculus a disintegrin-like and metalloprotease (repolyisin type) with thrombospondin type 1 motif, 7 (Adams7), mRNA.                     |
| scl0001566.1 2-S    | -34.9467 | -8.3  | Tcf7          | NM_009331.2 | Mus musculus transcription factor 7, T-cell specific (Tcf7), mRNA.                                                                            |
| scl49333.35.1 32-S  | -34.8684 | -1.38 | Eif4g1        | XM_358318   | Mus musculus eukaryotic translation initiation factor 4, gamma 1 (Eif4g1), mRNA.                                                              |
| scl070333.1 111-S   | -34.676  | -3.81 | Ase1          | NM_145822.1 |                                                                                                                                               |
| scl21972.20 222-S   | -34.628  | -1.51 | Sema4a        | NM_013658.2 | Mus musculus sema domain, immunoglobulin domain (Ig), transmembrane domain (TM) and short cytoplasmic domain, (semaphorin) 4A (Sema4a), mRNA. |
| scl0054711.1 45-S   | -34.4435 | -3.83 | Plagl2        | NM_018907.3 | Mus musculus pleiomorphic adenoma gene-like 2 (Plagl2), mRNA.                                                                                 |
| scl34303.2 339-S    | -34.4226 | -7.21 | Chst5         | NM_019950.1 | Mus musculus carbohydrate (N-acetylglucosamine 6-O) sulfotransferase 5 (Chst5), mRNA.                                                         |
| scl33725.12 115-S   | -34.2515 | -1.5  | Fkbp8         | NM_010223.1 | Mus musculus FK506 binding protein 8 (Fkbp8), mRNA.                                                                                           |
| scl32925.7 312-S    | -34.212  | -1.57 | 2310004L02Rik | NM_025504.2 | Mus musculus RIKEN cDNA 2310004L02 gene (2310004L02Rik), mRNA.                                                                                |
| scl0020678.1 3-S    | -34.1316 | -1.41 | Sox5          | NM_011444.1 | Mus musculus SRY-box containing gene 5 (Sox5), mRNA.                                                                                          |
| scl000851.1 458-S   | -33.7972 | -9.31 | Irf6          | NM_178083.2 | Mus musculus interferon regulatory factor 6 (Irf6), mRNA.                                                                                     |
| scl0022123.1 274-S  | -33.6485 | -1.35 | Psmd3         | NM_009439.1 | Mus musculus proteasome (prosome, macropain) 26S subunit, non-ATPase, 3 (Psmd3), mRNA.                                                        |
| scl0001626.1 14-S   | -33.6117 | -8.79 | AW046014      | NM_174989.1 | Mus musculus expressed sequence AW046014 (AW046014), mRNA.                                                                                    |
| scl0003720.1 47-S   | -33.452  | -1.68 | F12           | NM_021489.1 | Mus musculus coagulation factor XII (Hageman factor) (F12), mRNA.                                                                             |
| scl0218397.1 12-S   | -33.3619 | -1.4  | Rasa1         | NM_145452   | Mus musculus RAS p21 protein activator 1 (Rasa1), mRNA.                                                                                       |
| scl0227738.4 11-S   | -33.319  | -7.43 | Lrsam1        | NM_199302.1 | Mus musculus leucine rich repeat and sterile alpha motif containing 1 (Lrsam1), mRNA.                                                         |
| scl015013.2 70-S    | -33.138  | -1.33 | H2-Q2         | NM_010392   | Mus musculus histocompatibility 2, Q region locus 2 (H2-Q2), mRNA.                                                                            |
| scl47648.13.1 3-S   | -33.1274 | -3.12 | AW124722      | XM_139515.3 |                                                                                                                                               |
| scl34222.7 318-S    | -33.0674 | -1.53 | Rnf166        | XM_134599.3 |                                                                                                                                               |
| scl067605.5 228-S   | -33.0611 | -1.41 | Akt1s1        | NM_026270.1 | Mus musculus AKT1 substrate 1 (proline-rich) (Akt1s1), mRNA.                                                                                  |
| scl37690.5.564 26-S | -33.0545 | -1.47 | Gna11         | NM_010301.1 | Mus musculus guanine nucleotide binding protein, alpha 11 (Gna11), mRNA.                                                                      |
| scl0019377.2 133-S  | -32.9198 | -8.46 | Rai1          | NM_009021.1 | Mus musculus retinoic acid induced 1 (Rai1), mRNA.                                                                                            |
| scl020443.1 125-S   | -32.8137 | -1.62 | Siat4c        | NM_009178.2 | Mus musculus sialyltransferase 4C (beta-galactoside alpha-2,3-sialyltransferase) (Siat4c), mRNA.                                              |
| scl53012.17 160-S   | -32.8047 | -1.32 | A1450540      | NM_145505.2 | Mus musculus expressed sequence A1450540 (A1450540), mRNA.                                                                                    |
| scl0231807.1 240-S  | -32.7528 | -1.8  | BC037034      | NM_153161.1 | Mus musculus cDNA sequence BC037034 (BC037034), mRNA.                                                                                         |
| scl069890.1 204-S   | -32.6438 | -2.07 | Zfp219        | NM_027248   | Mus musculus zinc finger protein 219 (Zfp219), mRNA.                                                                                          |
| scl0002342.1 0-S    | -32.578  | -6.49 | G630009D10Rik | NM_177354.2 | Mus musculus RIKEN cDNA G630009D10 gene (G630009D10Rik), mRNA.                                                                                |
| scl018632.5 33-S    | -32.5723 | -1.33 | Pex11b        | NM_011069.2 | Mus musculus peroxisomal biogenesis factor 11b (Pex11b), mRNA.                                                                                |
| scl020535.23 4-S    | -32.4368 | -1.58 | Slc4a2        | NM_009207.1 | Mus musculus solute carrier family 4 (anion exchanger), member 2 (Slc4a2), mRNA.                                                              |
| scl40867.4.1 55-S   | -32.2301 | -1.38 | Nags          | NM_178053.2 | Mus musculus N-acetylglutamate synthase (Nags), mRNA.                                                                                         |
| scl026403.1 197-S   | -31.9399 | -1.39 | Map3k11       | NM_022012.2 | Mus musculus mitogen activated protein kinase kinase kinase 11 (Map3k11), mRNA.                                                               |
| scl31790.5 79-S     | -31.9356 | -1.51 | Fiz1          | NM_011813.2 | Mus musculus Fli3 interacting zinc finger protein 1 (Fiz1), mRNA.                                                                             |
| scl34708.22.13 8-S  | -31.93   | -7.81 | Rent1         | NM_030680   | Mus musculus regulator of nonsense transcripts 1 (Rent1), mRNA.                                                                               |
| scl0116871.14 11-S  | -31.8209 | -1.77 | Mta3          | NM_054082.1 | Mus musculus metastasis associated 3 (Mta3), mRNA.                                                                                            |
| scl25185.2.323 16-S | -31.7308 | -1.79 | Ppap2b        | NM_080555.1 | Mus musculus phosphatidic acid phosphatase type 2B (Ppap2b), mRNA.                                                                            |
| scl00228770.2 82-S  | -31.6403 | -8.44 | A930029K19Rik | NM_175468.2 | Mus musculus RIKEN cDNA A930029K19 gene (A930029K19Rik), mRNA.                                                                                |
| scl0002451.1 30-S   | -31.6152 | -2.91 | 5730502D15Rik | NM_026485.1 | Mus musculus RIKEN cDNA 5730502D15 gene (5730502D15Rik), mRNA.                                                                                |
| scl078887.5 29-S    | -31.5086 | -1.83 | 2310047115Rik | NM_030207.1 | Mus musculus RIKEN cDNA 2310047115 gene (2310047115Rik), mRNA.                                                                                |
| scl013356.3 25-S    | -31.4893 | -1.38 | Dgcr2         | XM_148524.1 | Mus musculus DiGeorge syndrome critical region gene 2 (Dgcr2), mRNA.                                                                          |
| scl0026936.2 165-S  | -31.388  | -1.69 | AA536749      | NM_012027.1 | Mus musculus expressed sequence AA536749 (AA536749), mRNA.                                                                                    |
| scl012153.1 23-S    | -31.336  | -1.36 | Bmp1          | NM_009755.2 | Mus musculus bone morphogenetic protein 1 (Bmp1), mRNA.                                                                                       |
| scl000319.1 7-S     | -31.1614 | -2.19 | Acin1         | NM_019567.1 | Mus musculus apoptotic chromatin condensation inducer 1 (Acin1), mRNA.                                                                        |
| scl21104.8 445-S    | -31.1363 | -1.81 | 2900073H19Rik | NM_026615.2 | Mus musculus RIKEN cDNA 2900073H19 gene (2900073H19Rik), mRNA.                                                                                |
| scl50683.12 301-S   | -31.1113 | -1.38 | Gtpbp2        | NM_019581.2 | Mus musculus GTP binding protein 2 (Gtpbp2), mRNA.                                                                                            |
| scl000403.1 95-S    | -31.0293 | -2.68 | Slc39a14      | NM_144808.1 | Mus musculus solute carrier family 39 (zinc transporter), member 14 (Slc39a14), mRNA.                                                         |
| scl23133.14.29 13-S | -30.9071 | -1.69 | Gmps          | XM_130877.3 | Mus musculus guanine monophosphate synthetase (Gmps), mRNA.                                                                                   |
| scl41519.8 316-S    | -30.8108 | -1.35 | BC003251      | NM_024480.2 | Mus musculus cDNA sequence BC003251 (BC003251), mRNA.                                                                                         |
| scl31668.16.1 1-S   | -30.7891 | -6.39 | Lu            | NM_020486.1 | Mus musculus Lutheran blood group (Auberger b antigen included) (Lu), mRNA.                                                                   |
| scl20482.12 3-S     | -30.7239 | -7.09 | 2410042D21Rik | NM_024254.2 | Mus musculus RIKEN cDNA 2410042D21 gene (2410042D21Rik), mRNA.                                                                                |
| scl020969.4 58-S    | -30.576  | -8.9  | Sdc1          | NM_011519.1 | Mus musculus syndecan 1 (Sdc1), mRNA.                                                                                                         |
| scl41352.8 186-S    | -30.5223 | -1.48 | Dullard       | NM_026017.1 | Mus musculus Dullard homolog (Xenopus laevis) (Dullard), mRNA.                                                                                |
| scl0074043.2 32-S   | -30.5169 | -2.47 | 4632428M11Rik | NM_028730.2 | Mus musculus RIKEN cDNA 4632428M11 gene (4632428M11Rik), mRNA.                                                                                |
| scl0001506.1 275-S  | -30.4513 | -1.83 | AA536749      | NM_012027.1 | Mus musculus expressed sequence AA536749 (AA536749), mRNA.                                                                                    |

|               |       |          |       |               |             |                                                                                                                           |
|---------------|-------|----------|-------|---------------|-------------|---------------------------------------------------------------------------------------------------------------------------|
| sc136492.10.1 | 4-S   | -30.3827 | -1.82 | Ifrd2         | NM_025903.1 | Mus musculus interferon-related developmental regulator 2 (Ifrd2), mRNA.                                                  |
| sc1000532.1   | 17-S  | -30.3517 | -1.35 | Yif1          | NM_026553.2 | Mus musculus Yip1 interacting factor homolog (S. cerevisiae) (Yif1), mRNA.                                                |
| sc10018021.2  | 84-S  | -30.2767 | -1.59 | Nfatc3        | NM_010901.1 | Mus musculus nuclear factor of activated T-cells, cytoplasmic, calcineurin-dependent 3 (Nfatc3), mRNA.                    |
| sc129861.5    | 188-S | -30.2693 | -1.29 | BC014699      | NM_145570.1 | Mus musculus cDNA sequence BC014699 (BC014699), mRNA.                                                                     |
| sc129553.16.1 | 150-S | -30.1916 | -1.35 | Slc6a13       | NM_144512.1 | Mus musculus solute carrier family 6 (neurotransmitter transporter, GABA), member 13 (Slc6a13), mRNA.                     |
| sc10319601.1  | 34-S  | -30.1465 | -5.13 | E430039K05Rik | NM_177318.2 | Mus musculus RIKEN cDNA E430039K05 gene (E430039K05Rik), mRNA.                                                            |
| sc10067231.2  | 265-S | -30.0805 | -1.71 | 2810442O16Rik | NM_024196.1 | Mus musculus RIKEN cDNA 2810442O16 gene (2810442O16Rik), mRNA.                                                            |
| sc151338.13   | 19-S  | -30.0137 | -1.3  | Nars          | NM_027350.1 | Mus musculus asparaginyl-tRNA synthetase (Nars), mRNA.                                                                    |
| sc10004055.1  | 79-S  | -29.6978 | -2.92 | Bcl7b         | NM_009745.1 | Mus musculus B-cell CLL/lymphoma 7B (Bcl7b), mRNA.                                                                        |
| sc136111.9.1  | 0-S   | -29.619  | -1.32 | Rp9h          | NM_018739.1 | Mus musculus retinitis pigmentosa 9 homolog (human) (Rp9h), mRNA.                                                         |
| sc150151.16   | 294-S | -29.4647 | -1.55 | A1429612      | XM_128606.4 | Mus musculus expressed sequence A1429612 (A1429612), mRNA.                                                                |
| sc136570.9.1  | 64-S  | -29.4522 | -1.55 | Dbr1          | NM_031403.1 | Mus musculus debranching enzyme homolog 1 (S. cerevisiae) (Dbr1), mRNA.                                                   |
| sc131390.16.1 | 7-S   | -29.4058 | -1.54 | 2410004H02Rik | NM_145954.1 | Mus musculus RIKEN cDNA 2410004H02 gene (2410004H02Rik), mRNA.                                                            |
| sc10071805.2  | 3-S   | -29.2842 | -2.75 | Nup93         | NM_172410.1 | Mus musculus nucleoporin 93 (Nup93), mRNA.                                                                                |
| sc132350.23.1 | 118-S | -29.1505 | -1.41 | 2610034N24Rik | NM_027256.1 | Mus musculus RIKEN cDNA 2610034N24 gene (2610034N24Rik), mRNA.                                                            |
| sc10209318.14 | 24-S  | -29.137  | -1.32 | Gps1          | NM_145370.1 | Mus musculus G protein pathway suppressor 1 (Gps1), mRNA.                                                                 |
| sc10068493.2  | 155-S | -29.0856 | -1.39 | 1110007M04Rik | NM_026742.1 | Mus musculus RIKEN cDNA 1110007M04 gene (1110007M04Rik), mRNA.                                                            |
| sc10004117.1  | 32-S  | -29.073  | -1.74 | Wdr1          | NM_011715.1 | Mus musculus WD repeat domain 1 (Wdr1), mRNA.                                                                             |
| sc1068490.3   | 256-S | -29.0666 | -2.13 | 1110003A17Rik | XM_358661.1 | Mus musculus RIKEN cDNA 1110003A17 gene (1110003A17Rik), mRNA.                                                            |
| sc147090.1    | 141-S | -28.9756 | -1.66 | Sf3b4         | NM_153053.3 | Mus musculus splicing factor 3b, subunit 4 (Sf3b4), mRNA.                                                                 |
| sc144288.11   | 154-S | -28.8162 | -1.29 | Lgals8        | NM_018886.2 | Mus musculus lectin, galactose binding, soluble 8 (Lgals8), mRNA.                                                         |
| sc133753.14   | 134-S | -28.7948 | -1.42 | Atp6v1b2      | NM_007509.2 | Mus musculus ATPase, H+ transporting, V1 subunit B, isoform 2 (Atp6v1b2), mRNA.                                           |
| sc10001610.1  | 0-S   | -28.741  | -1.44 | Decr2         | NM_011933.1 | Mus musculus 2-4-dienoyl-Coenzyme A reductase 2, peroxisomal (Decr2), mRNA.                                               |
| sc10021339.1  | 180-S | -28.6953 | -1.86 | Taf1a         | NM_021466.1 | Mus musculus TATA box binding protein (Tbp)-associated factor, RNA polymerase I, A (Taf1a), mRNA.                         |
| sc10076850.1  | 143-S | -28.688  | -6.94 | Eif2c4        | NM_153177.1 | Mus musculus eukaryotic translation initiation factor 2C, 4 (Eif2c4), mRNA.                                               |
| sc10003679.1  | 4-S   | -28.6059 | -7.84 | Col4a3bp      | NM_023420.1 | Mus musculus procollagen, type IV, alpha 3 (Goodpasture antigen) binding protein (Col4a3bp), mRNA.                        |
| sc152453.11   | 571-S | -28.5547 | -1.35 | Keo4          | NM_145502.2 | Mus musculus similar to Caenorhabditis elegans protein C42C1.9 (Keo4), mRNA.                                              |
| sc1000151.1   | 308-S | -28.5339 | -2.37 | AW538196      | NM_133952.1 | Mus musculus expressed sequence AW538196 (AW538196), mRNA.                                                                |
| sc146998.15.1 | 4-S   | -28.3945 | -1.29 | Eif3s7        | NM_018749.1 | Mus musculus eukaryotic translation initiation factor 3, subunit 7 (zeta) (Eif3s7), mRNA.                                 |
| sc1054403.19  | 44-S  | -28.2927 | -2.36 | Slc4a4        | NM_018760   | Mus musculus solute carrier family 4 (anion exchanger), member 4 (Slc4a4), mRNA.                                          |
| sc133072.15.1 | 0-S   | -28.0501 | -1.35 | Trim28        | NM_011588.1 | Mus musculus tripartite motif protein 28 (Trim28), mRNA.                                                                  |
| sc141225.47   | 412-S | -28.0317 | -1.71 | Myo18a        | NM_011586.1 | Mus musculus myosin XVIIIa (Myo18a), mRNA.                                                                                |
| sc121096.14   | 260-S | -27.9065 | -1.87 | Tbc1d13       | NM_146252.1 | Mus musculus TBC1 domain family, member 13 (Tbc1d13), mRNA.                                                               |
| sc134310.8    | 274-S | -27.7082 | -1.46 | Bcar1         | NM_009954.2 | Mus musculus breast cancer anti-estrogen resistance 1 (Bcar1), mRNA.                                                      |
| sc150143.3.1  | 18-S  | -27.6911 | -1.3  | 0610039D01Rik | NM_026307.2 | Mus musculus RIKEN cDNA 0610039D01 gene (0610039D01Rik), mRNA.                                                            |
| sc1013806.12  | 49-S  | -27.579  | -1.51 | Eno1          | NM_023119   | Mus musculus enolase 1, alpha non-neuron (Eno1), mRNA.                                                                    |
| sc1067118.7   | 5-S   | -27.4055 | -1.47 | Bfar          | XM_148088.1 | Mus musculus bifunctional apoptosis regulator (Bfar), mRNA.                                                               |
| sc10021416.1  | 5-S   | -27.3796 | -1.49 | Tcf7l2        | NM_009333.2 | Mus musculus transcription factor 7-like 2, T-cell specific, HMG-box (Tcf7l2), mRNA.                                      |
| sc10382073.1  | 20-S  | -27.1531 | -1.99 | D630044F24Rik | NM_201372.1 |                                                                                                                           |
| sc129614.24   | 170-S | -27.1171 | -2.16 | Apg7l         | NM_028835.1 | Mus musculus autophagy 7-like (S. cerevisiae) (Apg7l), mRNA.                                                              |
| sc10016480.2  | 126-S | -27.1155 | -1.97 | Jup           | NM_010593.1 | Mus musculus junction plakoglobin (Jup), mRNA.                                                                            |
| sc134655.25.1 | 28-S  | -27.0516 | -1.82 | Eps15-rs      | NM_007944.1 | Mus musculus epidermal growth factor receptor pathway substrate 15, related sequence (Eps15-rs), mRNA.                    |
| sc10050926.1  | 17-S  | -27.0377 | -1.86 | Hnrpd1        | NM_016690.2 | Mus musculus heterogeneous nuclear ribonucleoprotein D-like (Hnrpd1), mRNA.                                               |
| sc10003011.1  | 11-S  | -27.0199 | -1.31 | Agpat2        | NM_026212.1 | Mus musculus 1-acylglycerol-3-phosphate O-acyltransferase 2 (lysophosphatidic acid acyltransferase, beta) (Agpat2), mRNA. |
| sc100108989.1 | 82-S  | -26.8274 | -1.5  | Trp           | NM_133780.2 | Mus musculus translocated promoter region (Trp), mRNA.                                                                    |
| sc1000196.1   | 9-S   | -26.4598 | -1.84 | Actn4         | NM_021895.2 | Mus musculus actinin alpha 4 (Actn4), mRNA.                                                                               |
| sc10003521.1  | 94-S  | -26.4498 | -1.53 | Keap1         | NM_016679.2 | Mus musculus kelch-like ECH-associated protein 1 (Keap1), mRNA.                                                           |
| sc1018641.1   | 29-S  | -26.3063 | -1.56 | Pfkf          | NM_008826.2 | Mus musculus phosphofructokinase, liver, B-type (Pfkf), mRNA.                                                             |
| sc124799.82   | 95-S  | -26.2236 | -1.97 | Hspg2         |             | Mus musculus perlecan (heparan sulfate proteoglycan 2) (Hspg2), mRNA.                                                     |
| sc10001535.1  | 334-S | -26.1473 | -2.35 | Nags          | NM_145829.1 | Mus musculus N-acetylglutamate synthase (Nags), mRNA.                                                                     |
| sc116482.8    | 0-S   | -26.1399 | -1.36 | Rab17         | NM_008998.2 | Mus musculus RAB17, member RAS oncogene family (Rab17), mRNA.                                                             |
| sc10003767.1  | 12-S  | -26.0289 | -1.35 | Gna11         | NM_010301.1 | Mus musculus guanine nucleotide binding protein, alpha 11 (Gna11), mRNA.                                                  |
| sc10003203.1  | 308-S | -25.9456 | -1.63 | 3632413B07Rik | NM_172270.1 | Mus musculus RIKEN cDNA 3632413B07 gene (3632413B07Rik), mRNA.                                                            |
| sc10022195.1  | 278-S | -25.9304 | -1.3  | Ube2l3        | XM_148568.1 | Mus musculus ubiquitin-conjugating enzyme E2L 3 (Ube2l3), mRNA.                                                           |
| sc139551.10.1 | 228-S | -25.8878 | -7.65 | A930006D11    | NM_177790.2 | Mus musculus hypothetical protein A930006D11 (A930006D11), mRNA.                                                          |
| sc10020848.1  | 188-S | -25.8082 | -1.8  | Stat3         | NM_011486.2 | Mus musculus signal transducer and activator of transcription 3 (Stat3), mRNA.                                            |

|                     |          |         |               |             |                                                                                                                       |
|---------------------|----------|---------|---------------|-------------|-----------------------------------------------------------------------------------------------------------------------|
| sc118457.19.17 30-S | -25.7187 | -1.63   | Trpc4ap       | NM_019828.1 | Mus musculus transient receptor potential cation channel, subfamily C, member 4 associated protein (Trpc4ap), mRNA.   |
| sc126665.22 394-S   | -25.6999 | -2.73   | Slc2a9        | NM_145559.1 | Mus musculus solute carrier family 2 (facilitated glucose transporter), member 9 (Slc2a9), mRNA.                      |
| sc10004021.1 968-S  | -25.6294 | -1.46   | Pi4k2b        | NM_025951.1 | Mus musculus phosphatidylinositol 4-kinase type 2 beta (Pi4k2b), mRNA.                                                |
| sc139853.10 345-S   | -25.5447 | -1.82   | 5730455P16Rik | XM_126361.2 | Mus musculus RIKEN cDNA 5730455P16 gene (5730455P16Rik), mRNA.                                                        |
| sc10074754.1 5-S    | -25.5411 | -1.61   | Dhcr24        | NM_053272.1 | Mus musculus 24-dehydrocholesterol reductase (Dhcr24), mRNA.                                                          |
| sc149771.23.1 24-S  | -25.5162 | -2.25   | Dpp9          | NM_172624.1 | Mus musculus dipeptidylpeptidase 9 (Dpp9), mRNA.                                                                      |
| sc121992.22 340-S   | -25.23   | -1.87   | 3110045G13Rik | NM_028460.1 | Mus musculus RIKEN cDNA 3110045G13 gene (3110045G13Rik), mRNA.                                                        |
| sc140083.7.1 85-S   | -25.1192 | -1.5    | Cox10         | NM_178379.2 | Mus musculus COX10 homolog, cytochrome c oxidase assembly protein, heme A: farnesyltransferase (yeast) (Cox10), mRNA. |
| sc10074525.2 276-S  | -25.0991 | -2.86   | 8430419L09Rik | NM_028982.2 | Mus musculus RIKEN cDNA 8430419L09 gene (8430419L09Rik), mRNA.                                                        |
| sc10003447.1 0-S    | -25.0163 | -1.83   | Rbm5          | NM_148930.2 | Mus musculus RNA binding motif protein 5 (Rbm5), mRNA.                                                                |
| sc10003920.1 1369-S | -24.954  | -7.52   | Rab5b         | NM_177411.2 | Mus musculus RAB5B, member RAS oncogene family (Rab5b), mRNA.                                                         |
| sc1027993.9 8-S     | -24.9073 | -1.51   | D1Wsu40e      | NM_178601.2 | Mus musculus DNA segment, Chr 1, Wayne State University 40, expressed (D1Wsu40e), mRNA.                               |
| sc10027886.2 220-S  | -24.6803 | -5.87   | Es2el         | XM_147209.1 | Mus musculus expressed sequence 2 embryonic lethal (Es2el), mRNA.                                                     |
| sc10107173.1 330-S  | -24.642  | -1.31   | Al428855      | NM_207220.1 | Mus musculus expressed sequence Al428855 (Al428855), mRNA.                                                            |
| sc1016362.11 28-S   | -24.6112 | -1.79   | Irf1          | NM_008390.1 | Mus musculus interferon regulatory factor 1 (Irf1), mRNA.                                                             |
| sc149327.15.1 14-S  | -24.5112 | -6.76   | Ephb3         | NM_010143.1 | Mus musculus Eph receptor B3 (Ephb3), mRNA.                                                                           |
| sc149605.16 306-S   | -24.4905 | -1.44   | Prkr          | NM_011163.2 | Mus musculus protein kinase, interferon-inducible double stranded RNA dependent (Prkr), mRNA.                         |
| sc10192160.16 158-S | -24.4823 | -1.44   | Casc3         | NM_138660.1 | Mus musculus cancer susceptibility candidate 3 (Casc3), mRNA.                                                         |
| sc1068708.1 138-S   | -24.4776 | -1.65   | Rabl2a        | NM_026817.1 | Mus musculus RAB, member of RAS oncogene family-like 2A (Rabl2a), mRNA.                                               |
| sc10001776.1 145-S  | -24.4733 | -1.38   | Mapk1         | NM_011949.2 | Mus musculus mitogen activated protein kinase 1 (Mapk1), mRNA.                                                        |
| sc133204.17 108-S   | -24.3818 | -1.34   | D8ErtD325e    | NM_025904   | Mus musculus DNA segment, Chr 8, ERATO Doi 325, expressed (D8ErtD325e), mRNA.                                         |
| sc1013094.10 95-S   | -24.334  | -151.53 | Cyp2b9        | NM_010000.1 | Mus musculus cytochrome P450, family 2, subfamily b, polypeptide 9 (Cyp2b9), mRNA.                                    |
| sc126162.14.72 6-S  | -24.26   | -1.47   | Rnf10         | NM_016698   | Mus musculus ring finger protein 10 (Rnf10), mRNA.                                                                    |
| sc10077038.2 31-S   | -24.2434 | -5.67   | Zfp289        | NM_023854.1 | Mus musculus zinc finger protein 289 (Zfp289), mRNA.                                                                  |
| sc1052009.2 30-S    | -24.1585 | -2.35   | D17ErtD441e   | NM_198937.1 | Mus musculus DNA segment, Chr 17, ERATO Doi 441, expressed (D17ErtD441e), mRNA.                                       |
| sc100140721.2 267-S | -24.1402 | -3      | Caskin2       | NM_080643.2 | Mus musculus caspase-interacting protein 2 (Caskin2), mRNA.                                                           |
| sc139616.9.169 52-S | -24.1143 | -2.85   | Nr1d1         | NM_145434.1 | Mus musculus nuclear receptor subfamily 1, group D, member 1 (Nr1d1), mRNA.                                           |
| sc10021871.2 111-S  | -24.1083 | -1.41   | Atp6v0a2      | NM_011596.1 | Mus musculus ATPase, H+ transporting, lysosomal V0 subunit a isoform 2 (Atp6v0a2), mRNA.                              |
| sc10050798.2 33-S   | -24.0909 | -1.32   | Gne           | NM_015828.2 | Mus musculus glucosamine (Gne), mRNA.                                                                                 |
| sc1021351.9 19-S    | -24.0658 | -1.23   | Taldo1        | NM_011528.1 | Mus musculus transaldolase 1 (Taldo1), mRNA.                                                                          |
| sc154747.23 352-S   | -23.9598 | -1.47   | Dlgh3         | NM_016747.1 | Mus musculus discs, large homolog 3 (Drosophila) (Dlgh3), mRNA.                                                       |
| sc10011975.2 216-S  | -23.9234 | -1.4    | Atp6v0a1      | NM_016920.1 | Mus musculus ATPase, H+ transporting, lysosomal V0 subunit a isoform 1 (Atp6v0a1), mRNA.                              |
| sc127067.26 61-S    | -23.9172 | -2.37   | Unc84a        | NM_024451.1 | Mus musculus unc-84 homolog A (C. elegans) (Unc84a), mRNA.                                                            |
| sc10001633.1 3-S    | -23.8688 | -1.58   | Ubx1          | NM_024432.2 | Mus musculus UBX domain containing 1 (Ubx1), mRNA.                                                                    |
| sc10067123.2 83-S   | -23.8517 | -1.53   | Ubp1          | NM_023305.2 | Mus musculus ubiquitin-associated protein 1 (Ubp1), mRNA.                                                             |
| sc10069994.1 21-S   | -23.7947 | -1.65   | 1700027M01Rik | NM_023544.2 | Mus musculus RIKEN cDNA 1700027M01 gene (1700027M01Rik), mRNA.                                                        |
| sc143914.11.4 21-S  | -23.678  | -1.29   | H2afy         | NM_012015.1 | Mus musculus H2A histone family, member Y (H2afy), mRNA.                                                              |
| sc10018194.1 157-S  | -23.653  | -6.74   | Nsdhl         | NM_010941.3 | Mus musculus NAD(P) dependent steroid dehydrogenase-like (Nsdhl), mRNA.                                               |
| sc125528.7.1 41-S   | -23.5724 | -2.06   | Galt          | NM_016658.1 | Mus musculus galactose-1-phosphate uridylyl transferase (Galt), mRNA.                                                 |
| sc134568.25 184-S   | -23.563  | -1.37   | BC016188      | NM_145970.1 | Mus musculus cDNA sequence BC016188 (BC016188), mRNA.                                                                 |
| sc10002910.1 314-S  | -23.5154 | -1.62   | DXImx47e      | NM_207670.1 | Mus musculus DNA segment, Chr X, Immunex 47, expressed (DXImx47e), mRNA.                                              |
| sc100381314.1 0-S   | -23.5076 | -1.26   | 2010002H18Rik | NM_198653.1 | Mus musculus RIKEN cDNA 2010002H18 gene (2010002H18Rik), mRNA.                                                        |
| sc137657.36.1 139-S | -23.5033 | -1.41   | Stab2         | NM_138673.1 | Mus musculus stabilin 2 (Stab2), mRNA.                                                                                |
| sc121371.8.1 29-S   | -23.4736 | -1.24   | Rabggtb       | NM_011231.1 | Mus musculus RAB geranylgeranyl transferase, b subunit (Rabggtb), mRNA.                                               |
| sc10054403.2 10-S   | -23.4479 | -4.14   | Slc4a4        | NM_018760.1 | Mus musculus solute carrier family 4 (anion exchanger), member 4 (Slc4a4), mRNA.                                      |
| sc1013495.13 174-S  | -23.4405 | -1.38   | Drg2          | NM_021354.1 | Mus musculus developmentally regulated GTP binding protein 2 (Drg2), mRNA.                                            |
| sc1027399.1 171-S   | -23.4146 | -1.35   | Ihpk1         | NM_013785.2 | Mus musculus inositol hexaphosphate kinase 1 (Ihpk1), mRNA.                                                           |
| sc100328365.2 167-S | -23.3616 | -2.87   | BC065120      | NM_183208.2 |                                                                                                                       |
| sc119777.13 152-S   | -23.2343 | -3.47   | Arfgap1       | NM_145760.2 | Mus musculus ADP-ribosylation factor GTPase activating protein 1 (Arfgap1), mRNA.                                     |
| sc100227682.2 166-S | -23.2236 | -1.28   | G43005L02Rik  | NM_145520.2 |                                                                                                                       |
| sc155078.9.1 18-S   | -23.2155 | -2.23   | Lmo6          | NM_175097.2 | Mus musculus LIM domain only 6 (Lmo6), mRNA.                                                                          |
| sc151531.20.1 18-S  | -23.1803 | -1.47   | 1810057E01Rik | NM_030749.1 | Mus musculus RIKEN cDNA 1810057E01 gene (1810057E01Rik), mRNA.                                                        |
| sc129552.17.1 293-S | -23.1737 | -1.24   | Slc6a12       | NM_133661.1 | Mus musculus solute carrier family 6 (neurotransmitter transporter, betaine/GABA), member 12 (Slc6a12), mRNA.         |
| sc100224133.1 32-S  | -23.1131 | -2.32   | Parp14        | NM_145481.1 |                                                                                                                       |
| sc122694.6 358-S    | -23.1113 | -1.41   | Extl2         | NM_021388.2 | Mus musculus exostosins (multiple)-like 2 (Extl2), mRNA.                                                              |
| sc10219158.1 104-S  | -23.1096 | -1.52   | 2610301G19Rik | XM_358314.1 | Mus musculus RIKEN cDNA 2610301G19 gene (2610301G19Rik), mRNA.                                                        |

|                     |          |        |               |             |                                                                                                   |
|---------------------|----------|--------|---------------|-------------|---------------------------------------------------------------------------------------------------|
| scl40612.43.1 21-S  | -23.0988 | -1.46  | Tbcd          |             |                                                                                                   |
| scl00114896.1 45-S  | -23.0065 | -1.36  | Afg3l1        | NM_054070.1 | Mus musculus AFG3(ATPase family gene 3)-like 1 (yeast) (Afg3l1), mRNA.                            |
| scl29713.3 34-S     | -22.994  | -2.14  | Arl6ip5       | NM_022992.1 | Mus musculus ADP-ribosylation factor-like 6 interacting protein 5 (Arl6ip5), mRNA.                |
| scl27250.2 266-S    | -22.9058 | -1.5   | D730049H07Rik | NM_175423   | Mus musculus RIKEN cDNA D730049H07 gene (D730049H07Rik), mRNA.                                    |
| scl26987.8.1779 4-S | -22.8989 | -4.22  | Cpsf4         | NM_178576.1 | Mus musculus cleavage and polyadenylation specific factor 4 (Cpsf4), mRNA.                        |
| scl0399566.4 97-S   | -22.8756 | -1.44  | Btbd6         | NM_201646   | Mus musculus BTB (POZ) domain containing 6 (Btbd6), mRNA.                                         |
| scl0210711.2 41-S   | -22.8246 | -1.25  | 1110007A13Rik | NM_145955.2 | Mus musculus RIKEN cDNA 1110007A13 gene (1110007A13Rik), mRNA.                                    |
| scl24706.58 26-S    | -22.7663 | -1.63  | Frap1         | NM_020009.1 | Mus musculus FK506 binding protein 12-rapamycin associated protein 1 (Frap1), mRNA.               |
| scl0020874.2 150-S  | -22.7603 | -1.91  | Stk2          | NM_009289.1 |                                                                                                   |
| scl0002187.1 532-S  | -22.7357 | -1.32  | Rab18         | NM_181070.2 | Mus musculus RAB18, member RAS oncogene family (Rab18), mRNA.                                     |
| scl016828.6 330-S   | -22.7139 | -2.09  | Ldh1          | NM_010699.1 | Mus musculus lactate dehydrogenase 1, A chain (Ldh1), mRNA.                                       |
| scl50283.7.5 2-S    | -22.6717 | -1.27  | Psmb1         | NM_011185   | Mus musculus proteasome (prosome, macropain) subunit, beta type 1 (Psmb1), mRNA.                  |
| scl016973.22 185-S  | -22.6111 | -1.72  | Lrp5          | NM_008513.1 | Mus musculus low density lipoprotein receptor-related protein 5 (Lrp5), mRNA.                     |
| scl47650.13 510-S   | -22.5798 | -1.7   | Ppara         | NM_011144.2 | Mus musculus peroxisome proliferator activated receptor alpha (Ppara), mRNA.                      |
| scl056371.1 4-S     | -22.561  | -2.31  | Fzr1          | NM_019757.1 | Mus musculus fizzy/cell division cycle 20 related 1 (Drosophila) (Fzr1), mRNA.                    |
| scl27050.15.6 2-S   | -22.5481 | -1.52  | Eif3s9        | NM_133916.1 | Mus musculus eukaryotic translation initiation factor 3, subunit 9 (eta) (Eif3s9), mRNA.          |
| scl16430.4.1 256-S  | -22.5311 | -2.12  | A930029B02Rik | NM_178779.2 |                                                                                                   |
| scl013089.9 98-S    | -22.4761 | -23.87 | Cyp2b13       | NM_007813.1 | Mus musculus cytochrome P450, family 2, subfamily b, polypeptide 13 (Cyp2b13), mRNA.              |
| scl0230861.11 53-S  | -22.4737 | -1.29  | Eif4g3        | NM_172703.1 | Mus musculus eukaryotic translation initiation factor 4 gamma, 3 (Eif4g3), mRNA.                  |
| scl0022722.1 112-S  | -22.2602 | -2.53  | Zfp64         | NM_009564.1 | Mus musculus zinc finger protein 64 (Zfp64), mRNA.                                                |
| scl0050909.2 55-S   | -22.1176 | -1.29  | C1r           | NM_023143.1 | Mus musculus complement component 1, r subcomponent (C1r), mRNA.                                  |
| scl45535.5 307-S    | -22.1081 | -1.46  | 1810034K20Rik | NM_023397.3 | Mus musculus RIKEN cDNA 1810034K20 gene (1810034K20Rik), mRNA.                                    |
| scl000238.1 112-S   | -22.0891 | -1.28  | Stard10       | NM_019990.1 | Mus musculus START domain containing 10 (Stard10), mRNA.                                          |
| scl00276919.2 158-S | -22.0402 | -1.53  | Gemin4        | NM_177367.2 | Mus musculus gem (nuclear organelle) associated protein 4 (Gemin4), mRNA.                         |
| scl52297.3.1 24-S   | -21.9703 | -2.83  | 9430020K01Rik | XM_140198.3 |                                                                                                   |
| scl0021812.1 48-S   | -21.9269 | -1.26  | Tgfb1         | NM_009370.2 | Mus musculus transforming growth factor, beta receptor 1 (Tgfb1), mRNA.                           |
| scl022757.8 328-S   | -21.8373 | -1.22  | Zfp95         | XM_355663.1 | Mus musculus zinc finger protein 95 (Zfp95), mRNA.                                                |
| scl0233208.1 10-S   | -21.8352 | -1.74  | Al480556      | XM_133474.4 | Mus musculus expressed sequence Al480556 (Al480556), mRNA.                                        |
| scl46892.6 503-S    | -21.8168 | -1.56  | BC025519      | XM_110101.3 | Mus musculus cDNA sequence BC025519 (BC025519), mRNA.                                             |
| scl52940.15.185 1-S | -21.5904 | -3.52  | Pprc1         | XM_359412.1 |                                                                                                   |
| scl52406.11.1 60-S  | -21.5903 | -1.29  | Actr1a        | NM_016860.1 | Mus musculus ARP1 actin-related protein 1 homolog A (yeast) (Actr1a), mRNA.                       |
| scl0105440.12 47-S  | -21.5889 | -2.67  | Kctd9         | NM_134073.1 | Mus musculus potassium channel tetramerisation domain containing 9 (Kctd9), mRNA.                 |
| scl37395.7.349 6-S  | -21.5127 | -2     | Dtx3          | NM_030714.1 | Mus musculus dxtex 3 homolog (Drosophila) (Dtx3), mRNA.                                           |
| scl31727.20.1 54-S  | -21.4667 | -3.14  | Dhx34         | NM_027883.1 | Mus musculus DEAH (Asp-Glu-Ala-His) box polypeptide 34 (Dhx34), mRNA.                             |
| scl028019.8 226-S   | -21.4474 | -2.61  | Ing4          | NM_133345.1 | Mus musculus inhibitor of growth family, member 4 (Ing4), mRNA.                                   |
| scl0002072.1 701-S  | -21.4058 | -3.44  | Nr1h5         | NM_198658.1 | Mus musculus nuclear receptor subfamily 1, group H, member 5 (Nr1h5), transcript variant 1, mRNA. |
| scl0235169.2 28-S   | -21.3892 | -1.77  | BC024806      | NM_172291.1 | Mus musculus cDNA sequence BC024806 (BC024806), mRNA.                                             |
| scl000224.1 0-S     | -21.3139 | -2.61  | Sult2b1       | NM_017465.1 | Mus musculus sulfotransferase family, cytosolic, 2B, member 1 (Sult2b1), mRNA.                    |
| scl0075751.2 140-S  | -21.3138 | -1.52  | Ipo4          | NM_024267.4 | Mus musculus importin 4 (ipo4), mRNA.                                                             |
| scl0003167.1 1-S    | -21.2658 | -2.67  | Il15ra        | NM_133836.1 | Mus musculus interleukin 15 receptor, alpha chain (Il15ra), mRNA.                                 |
| scl28154.19 171-S   | -21.2378 | -1.37  | Dmtf1         | NM_011806.2 | Mus musculus cyclin D binding myb-like transcription factor 1 (Dmtf1), mRNA.                      |
| scl0276846.12 121-S | -21.2303 | -2.67  | Pigs          | NM_201406.1 | Mus musculus phosphatidylinositol glycan, class S (Pigs), mRNA.                                   |
| scl0066052.1 175-S  | -21.2109 | -1.23  | Sdhc          | NM_025321.1 | Mus musculus succinate dehydrogenase complex, subunit C, integral membrane protein (Sdhc), mRNA.  |
| scl053607.7 2-S     | -21.1765 | -2.02  | Snrpa         | NM_015782.2 | Mus musculus small nuclear ribonucleoprotein polypeptide A (Snrpa), mRNA.                         |
| scl46991.17.2 22-S  | -21.1316 | -1.49  | Trmprs6       | NM_027902.1 | Mus musculus transmembrane serine protease 6 (Trmprs6), mRNA.                                     |
| scl0076142.1 0-S    | -21.0366 | -4.08  | Ppp1r14c      | NM_133485.1 | Mus musculus protein phosphatase 1, regulatory (inhibitor) subunit 14c (Ppp1r14c), mRNA.          |
| scl067581.1 259-S   | -21.0189 | -1.39  | 4930451A13Rik | NM_026254.2 | Mus musculus RIKEN cDNA 4930451A13 gene (4930451A13Rik), mRNA.                                    |
| scl25881.20.1 16-S  | -21.001  | -1.67  | Ars2          | NM_031405.1 | Mus musculus arsenate resistance protein 2 (Ars2), mRNA.                                          |
| scl0019336.1 63-S   | -20.9564 | -1.33  | Rab24         | NM_009000.2 | Mus musculus RAB24, member RAS oncogene family (Rab24), mRNA.                                     |
| scl056628.1 171-S   | -20.9399 | -1.23  | LOC56628      |             |                                                                                                   |
| scl000671.1 1-S     | -20.922  | -1.49  | Ryk           | NM_013649   | Mus musculus receptor-like tyrosine kinase (Ryk), mRNA.                                           |
| scl072106.9 198-S   | -20.8978 | -1.32  | 2610003J06Rik | NM_028101.1 | Mus musculus RIKEN cDNA 2610003J06 gene (2610003J06Rik), mRNA.                                    |
| scl43064.12 579-S   | -20.8665 | -1.73  | Fntb          | NM_145927.1 | Mus musculus farnesyltransferase, CAAX box, beta (Fntb), mRNA.                                    |
| scl51509.11.1 166-S | -20.8456 | -2.45  | Apbb3         | NM_146085.1 | Mus musculus amyloid beta (A4) precursor protein-binding, family B, member 3 (Apbb3), mRNA.       |
| scl0068695.1 200-S  | -20.8091 | -1.36  | 1110033O09Rik | NM_026812.1 | Mus musculus RIKEN cDNA 1110033O09 gene (1110033O09Rik), mRNA.                                    |
| scl38697.44.1 55-S  | -20.7754 | -3.2   | Abca7         | NM_013850.1 | Mus musculus ATP-binding cassette, sub-family A (ABC1), member 7 (Abca7), mRNA.                   |

|                     |          |       |               |             |                                                                                                       |
|---------------------|----------|-------|---------------|-------------|-------------------------------------------------------------------------------------------------------|
| sci0055989.2 71-S   | -20.7535 | -1.46 | Nol5          | NM_018868.1 | Mus musculus nucleolar protein 5 (Nol5), mRNA.                                                        |
| sci0353371.2 330-S  | -20.7507 | -2.56 | Oxct2b        | NM_181859.1 | Mus musculus 3-oxoacid CoA transferase 2B (Oxct2b), mRNA.                                             |
| sci39227.8.1 2-S    | -20.7348 | -2.55 | Pycr1         | NM_144795.1 | Mus musculus pyrroline-5-carboxylate reductase 1 (Pycr1), mRNA.                                       |
| sci44724.21.5 2-S   | -20.7315 | -1.66 | Ddx46         | NM_145975.1 | Mus musculus DEAD (Asp-Glu-Ala-Asp) box polypeptide 46 (Ddx46), mRNA.                                 |
| sci48775.5 265-S    | -20.656  | -1.71 | Emp2          | NM_007929.1 | Mus musculus epithelial membrane protein 2 (Emp2), mRNA.                                              |
| sci094093.7 13-S    | -20.6516 | -3.78 | Trim33        | NM_053170.1 | Mus musculus tripartite motif protein 33 (Trim33), mRNA.                                              |
| sci0234385.1 330-S  | -20.6456 | -1.58 | Mast3         | NM_199308.1 |                                                                                                       |
| sci00228602.2 5-S   | -20.6015 | -1.69 | 4930402H24Rik | NM_029432.1 | Mus musculus RIKEN cDNA 4930402H24 gene (4930402H24Rik), mRNA.                                        |
| sci23927.19.1 34-S  | -20.5666 | -1.36 | Ipo13         | NM_146152.2 | Mus musculus importin 13 (Ipo13), mRNA.                                                               |
| sci021937.10 167-S  | -20.5334 | -1.51 | Tnfrsf1a      | NM_011609.2 | Mus musculus tumor necrosis factor receptor superfamily, member 1a (Tnfrsf1a), mRNA.                  |
| sci20266.8 58-S     | -20.48   | -1.52 | D430028G21Rik | NM_144888.1 | Mus musculus RIKEN cDNA D430028G21 gene (D430028G21Rik), mRNA.                                        |
| sci0065970.2 260-S  | -20.4688 | -1.49 | D15Ert366e    | NM_023063.1 | Mus musculus DNA segment, Chr 15, ERATO Doi 366, expressed (D15Ert366e), mRNA.                        |
| sci066812.1 16-S    | -20.4681 | -1.53 | 8430432M10Rik | NM_176831.2 | Mus musculus RIKEN cDNA 8430432M10 gene (8430432M10Rik), mRNA.                                        |
| sci46720.13 574-S   | -20.4648 | -5.93 | Pou6f1        | NM_010127.2 | Mus musculus POU domain, class 6, transcription factor 1 (Pou6f1), mRNA.                              |
| sci011898.16 99-S   | -20.435  | -1.31 | Ass1          | NM_007494.2 | Mus musculus argininosuccinate synthetase 1 (Ass1), mRNA.                                             |
| sci0170826.1 122-S  | -20.4124 | -2.39 | Ppargc1b      | NM_133249   | Mus musculus peroxisome proliferative activated receptor, gamma, coactivator 1 beta (Ppargc1b), mRNA. |
| sci27387.5.1 3-S    | -20.3974 | -4.45 | Mvk           | NM_023556.2 | Mus musculus mevalonate kinase (Mvk), mRNA.                                                           |
| sci00224727.2 315-S | -20.3613 | -1.28 | Bat3          | NM_057171.1 | Mus musculus HLA-B-associated transcript 3 (Bat3), mRNA.                                              |
| sci44632.16.1 30-S  | -20.2201 | -1.22 | C130052I12Rik | NM_146047.1 | Mus musculus RIKEN cDNA C130052I12 gene (C130052I12Rik), mRNA.                                        |
| sci49447.9 394-S    | -20.1919 | -1.4  | Pmm2          | XM_147219.1 | Mus musculus phosphomannomutase 2 (Pmm2), mRNA.                                                       |
| sci0050771.2 184-S  | -20.1489 | -1.65 | Atp9b         | NM_015805.2 | Mus musculus ATPase, class II, type 9B (Atp9b), mRNA.                                                 |
| sci074754.9 24-S    | -20.1472 | -1.5  | Dhcr24        | NM_053272.1 | Mus musculus 24-dehydrocholesterol reductase (Dhcr24), mRNA.                                          |
| sci0012334.2 163-S  | -20.1347 | -1.28 | Capn2         | NM_009794.1 | Mus musculus calpain 2 (Capn2), mRNA.                                                                 |
| sci17296.11 403-S   | -20.0497 | -2.02 | Vamp4         | NM_016796.2 | Mus musculus vesicle-associated membrane protein 4 (Vamp4), mRNA.                                     |
| sci44775.16.1 15-S  | -20.0356 | -1.35 | Secisbp2      | XM_127336.2 |                                                                                                       |



TABLE A2

## GENMAPPS AND GENE ONTOLOGIES SIGNIFICANTLY CHANGED BY THE ATHEROGENIC DIET IN LIVERS

## UP-REGULATED - GENMAPP

| No. | MAPP Name                                    | Number Changed | Number Measured | Number on MAPP | Percent Changed | Percent Present | Z Score | Permuted P Value |
|-----|----------------------------------------------|----------------|-----------------|----------------|-----------------|-----------------|---------|------------------|
| 1   | Mm_Ribosomal_Proteins                        | 55             | 78              | 80             | 70.5128         | 97.5000         | 11.6880 | 0.0000           |
| 2   | Mm_Electron_Transport_Chain                  | 41             | 66              | 83             | 62.1212         | 79.5181         | 8.9860  | 0.0000           |
| 3   | Mm_Translation_Factors                       | 25             | 49              | 50             | 51.0204         | 98.0000         | 5.7370  | 0.0000           |
| 4   | Mm_Proteasome_Degradation                    | 32             | 74              | 81             | 43.2432         | 91.3580         | 5.3520  | 0.0000           |
| 5   | Mm_Complement_and_Coagulation_Cascades_KEGG  | 25             | 60              | 62             | 41.6667         | 96.7742         | 4.4980  | 0.0000           |
| 6   | Mm_mRNA_processing_binding_Reactome          | 115            | 427             | 551            | 26.9321         | 77.4955         | 4.3810  | 0.0000           |
| 7   | Mm_Citrate_cycle_TCA_cycle_                  | 9              | 14              | 27             | 64.2857         | 51.8519         | 4.3200  | 0.0000           |
| 8   | Mm_TNF-alpha-NF-kB_NetPath_9                 | 48             | 167             | 176            | 28.7425         | 94.8864         | 3.2610  | 0.0000           |
| 9   | Mm_Fatty_Acid_Beta_Oxidation_Meta_BiGCaT     | 14             | 31              | 32             | 45.1613         | 96.8750         | 3.7190  | 0.0010           |
| 10  | Mm_Fatty_acid_metabolism                     | 20             | 51              | 66             | 39.2157         | 77.2727         | 3.6940  | 0.0010           |
| 11  | Mm_Valine_leucine_and_isoleucine_degradation | 12             | 27              | 44             | 44.4444         | 61.3636         | 3.3740  | 0.0020           |
| 12  | Mm_Mitochondrial_fatty_acid_betaoxidation    | 9              | 16              | 16             | 56.2500         | 100.0000        | 3.7990  | 0.0030           |
| 13  | Mm_Reductive_carboxylate_cycle_CO2_fixation_ | 4              | 5               | 15             | 80.0000         | 33.3333         | 3.4750  | 0.0030           |
| 14  | Mm_Butanoate_metabolism                      | 11             | 26              | 69             | 42.3077         | 37.6812         | 3.0330  | 0.0030           |
| 15  | Mm_Complement_Activation_Classical           | 8              | 15              | 16             | 53.3333         | 93.7500         | 3.3900  | 0.0060           |
| 16  | Mm_Propanoate_metabolism                     | 7              | 14              | 52             | 50.0000         | 26.9231         | 2.9560  | 0.0060           |
| 17  | Mm_2-Tissues-Internal_Organs                 | 50             | 187             | 202            | 26.7380         | 92.5743         | 2.7450  | 0.0060           |
| 18  | Mm_Fatty_Acid_Beta_Oxidation_1_BiGCaT        | 11             | 26              | 27             | 42.3077         | 96.2963         | 3.0330  | 0.0070           |
| 19  | Mm_Lysine_degradation                        | 13             | 34              | 69             | 38.2353         | 49.2754         | 2.8640  | 0.0070           |
| 20  | Mm_Irinotecan_pathway_PharmGKB               | 6              | 10              | 12             | 60.0000         | 83.3333         | 3.3040  | 0.0080           |

## UP-REGULATED - GENE ONTOLOGY

| No. | GO Name                                               | GO Type | Number Changed | Number Measured | Number in GO | Percent Changed | Percent Present | Z Score | Permuted P Value |
|-----|-------------------------------------------------------|---------|----------------|-----------------|--------------|-----------------|-----------------|---------|------------------|
| 1   | biosynthesis                                          | P       | 313            | 1154            | 1428         | 27.1231         | 80.8123         | 13.1310 | 0.0000           |
| 2   | metabolism                                            | P       | 1222           | 6721            | 7938         | 18.1818         | 84.6687         | 12.7510 | 0.0000           |
| 3   | cellular physiological process                        | P       | 1513           | 8935            | 10403        | 16.9334         | 85.8887         | 11.8860 | 0.0000           |
| 4   | generation of precursor metabolites and energy        | P       | 179            | 598             | 722          | 29.9331         | 82.8255         | 11.2760 | 0.0000           |
| 5   | protein biosynthesis                                  | P       | 169            | 588             | 801          | 28.7415         | 73.4082         | 10.3320 | 0.0000           |
| 6   | physiological process                                 | P       | 1606           | 9962            | 11632        | 16.1213         | 85.6431         | 9.7540  | 0.0000           |
| 7   | protein metabolism                                    | P       | 566            | 2850            | 3423         | 19.8597         | 83.2603         | 9.6810  | 0.0000           |
| 8   | electron transport                                    | P       | 114            | 386             | 461          | 29.5337         | 83.7310         | 8.7640  | 0.0000           |
| 9   | mitochondrial electron transport\, NADH to ubiquinone | P       | 12             | 14              | 25           | 85.7143         | 56.0000         | 7.6770  | 0.0000           |
| 10  | ubiquitin cycle                                       | P       | 114            | 438             | 511          | 26.0274         | 85.7143         | 7.2170  | 0.0000           |
| 11  | ubiquitin-dependent protein catabolism                | P       | 46             | 132             | 149          | 34.8485         | 88.5906         | 6.8390  | 0.0000           |
| 12  | transport                                             | P       | 469            | 2545            | 2884         | 18.4283         | 88.2455         | 6.7580  | 0.0000           |
| 13  | ATP synthesis coupled proton transport                | P       | 22             | 45              | 60           | 48.8889         | 75.0000         | 6.6850  | 0.0000           |
| 14  | protein transport                                     | P       | 139            | 590             | 654          | 23.5593         | 90.2141         | 6.6680  | 0.0000           |
| 15  | ATP biosynthesis                                      | P       | 23             | 49              | 64           | 46.9388         | 76.5625         | 6.5850  | 0.0000           |
| 16  | protein localization                                  | P       | 148            | 645             | 714          | 22.9457         | 90.3361         | 6.5280  | 0.0000           |
| 17  | intracellular protein transport                       | P       | 104            | 416             | 463          | 25.0000         | 89.8488         | 6.4190  | 0.0000           |
| 18  | intracellular transport                               | P       | 146            | 650             | 740          | 22.4615         | 87.8378         | 6.1930  | 0.0000           |
| 19  | nucleotide metabolism                                 | P       | 57             | 194             | 236          | 29.3814         | 82.2034         | 6.1110  | 0.0000           |
| 20  | purine nucleotide biosynthesis                        | P       | 29             | 75              | 96           | 38.6667         | 78.1250         | 6.0950  | 0.0000           |
| 21  | protein folding                                       | P       | 58             | 200             | 227          | 29.0000         | 88.1057         | 6.0500  | 0.0000           |
| 22  | protein catabolism                                    | P       | 56             | 192             | 215          | 29.1667         | 89.3023         | 5.9930  | 0.0000           |
| 23  | lipid metabolism                                      | P       | 130            | 581             | 616          | 22.3752         | 94.3182         | 5.7800  | 0.0000           |
| 24  | translational initiation                              | P       | 23             | 58              | 72           | 39.6552         | 80.5556         | 5.5730  | 0.0000           |
| 25  | fatty acid metabolism                                 | P       | 46             | 156             | 164          | 29.4872         | 95.1220         | 5.5110  | 0.0000           |
| 26  | complement activation\, alternative pathway           | P       | 7              | 9               | 10           | 77.7778         | 90.0000         | 5.4710  | 0.0000           |
| 27  | aromatic compound metabolism                          | P       | 33             | 101             | 108          | 32.6733         | 93.5185         | 5.3470  | 0.0000           |
| 28  | protein targeting                                     | P       | 60             | 228             | 261          | 26.3158         | 87.3563         | 5.2950  | 0.0000           |
| 29  | RNA processing                                        | P       | 79             | 329             | 371          | 24.0122         | 88.6792         | 5.1720  | 0.0000           |
| 30  | main pathways of carbohydrate metabolism              | P       | 32             | 100             | 132          | 32.0000         | 75.7576         | 5.1270  | 0.0000           |
| 31  | regulation of translation                             | P       | 25             | 71              | 76           | 35.2113         | 93.4211         | 5.0930  | 0.0000           |
| 32  | nucleoside metabolism                                 | P       | 13             | 27              | 44           | 48.1482         | 61.3636         | 5.0650  | 0.0000           |
| 33  | tricarboxylic acid cycle                              | P       | 12             | 24              | 24           | 50.0000         | 100.0000        | 5.0350  | 0.0000           |
| 34  | nucleotide biosynthesis                               | P       | 38             | 129             | 155          | 29.4574         | 83.2258         | 4.9970  | 0.0000           |
| 35  | RNA splicing                                          | P       | 41             | 144             | 167          | 28.4722         | 86.2276         | 4.9420  | 0.0000           |
| 36  | proton transport                                      | P       | 25             | 74              | 92           | 33.7838         | 80.4348         | 4.8470  | 0.0000           |
| 37  | mRNA metabolism                                       | P       | 51             | 196             | 223          | 26.0204         | 87.8924         | 4.7850  | 0.0000           |
| 38  | RNA metabolism                                        | P       | 91             | 412             | 465          | 22.0874         | 88.6022         | 4.6680  | 0.0000           |
| 39  | lipid transport                                       | P       | 23             | 68              | 76           | 33.8235         | 89.4737         | 4.6550  | 0.0000           |
| 40  | gluconeogenesis                                       | P       | 10             | 20              | 20           | 50.0000         | 100.0000        | 4.5960  | 0.0000           |
| 41  | regulation of translational initiation                | P       | 13             | 30              | 30           | 43.3333         | 100.0000        | 4.5830  | 0.0000           |
| 42  | nuclear mRNA splicing\, via spliceosome               | P       | 34             | 118             | 135          | 28.8136         | 87.4074         | 4.5760  | 0.0000           |
| 43  | acetyl-CoA metabolism                                 | P       | 14             | 34              | 34           | 41.1765         | 100.0000        | 4.5180  | 0.0000           |
| 44  | mRNA processing                                       | P       | 45             | 173             | 198          | 26.0116         | 87.3737         | 4.4890  | 0.0000           |
| 45  | energy derivation by oxidation of organic compounds   | P       | 40             | 150             | 182          | 26.6667         | 82.4176         | 4.4070  | 0.0000           |
| 46  | nitric oxide biosynthesis                             | P       | 9              | 18              | 19           | 50.0000         | 94.7368         | 4.3600  | 0.0000           |
| 47  | response to oxidative stress                          | P       | 20             | 59              | 63           | 33.8983         | 93.6508         | 4.3510  | 0.0000           |
| 48  | antigen presentation\, exogenous peptide antigen      | P       | 4              | 5               | 6            | 80.0000         | 83.3333         | 4.2200  | 0.0000           |
| 49  | copper ion homeostasis                                | P       | 4              | 5               | 5            | 80.0000         | 100.0000        | 4.2200  | 0.0000           |
| 50  | response to unfolded protein                          | P       | 16             | 46              | 55           | 34.7826         | 83.6364         | 4.0130  | 0.0000           |
| 51  | peroxisome organization and biogenesis                | P       | 8              | 17              | 18           | 47.0588         | 94.4444         | 3.8890  | 0.0000           |
| 52  | cell redox homeostasis                                | P       | 7              | 14              | 16           | 50.0000         | 87.5000         | 3.8440  | 0.0000           |
| 53  | amino acid and derivative metabolism                  | P       | 62             | 292             | 325          | 21.2329         | 89.8462         | 3.4910  | 0.0000           |
| 54  | amino acid metabolism                                 | P       | 53             | 245             | 273          | 21.6327         | 89.7436         | 3.3730  | 0.0000           |
| 55  | nitrogen compound metabolism                          | P       | 76             | 383             | 421          | 19.8433         | 90.9739         | 3.2210  | 0.0000           |
| 56  | mitochondrial fusion                                  | P       | 3              | 3               | 3            | 100.0000        | 100.0000        | 4.2620  | 0.0010           |
| 57  | deoxyribonucleotide catabolism                        | P       | 4              | 5               | 5            | 80.0000         | 100.0000        | 4.2200  | 0.0010           |
| 58  | ER to Golgi vesicle-mediated transport                | P       | 18             | 53              | 59           | 33.9623         | 89.8305         | 4.1370  | 0.0010           |
| 59  | response to reactive oxygen species                   | P       | 8              | 16              | 16           | 50.0000         | 100.0000        | 4.1100  | 0.0010           |
| 60  | aromatic amino acid family metabolism                 | P       | 10             | 23              | 23           | 43.4783         | 100.0000        | 4.0320  | 0.0010           |
| 61  | protein ubiquitination                                | P       | 36             | 147             | 173          | 24.4898         | 84.9711         | 3.6020  | 0.0010           |

|     |                                                                                                  |   |     |      |      |          |          |         |        |
|-----|--------------------------------------------------------------------------------------------------|---|-----|------|------|----------|----------|---------|--------|
| 62  | secretory pathway                                                                                | P | 42  | 179  | 194  | 23.4637  | 92.2680  | 3.5840  | 0.0010 |
| 63  | rRNA processing                                                                                  | P | 19  | 65   | 70   | 29.2308  | 92.8571  | 3.4870  | 0.0010 |
| 64  | vesicle-mediated transport                                                                       | P | 74  | 379  | 406  | 19.5251  | 93.3498  | 3.0240  | 0.0010 |
| 65  | cotranslational protein targeting to membrane                                                    | P | 7   | 12   | 13   | 58.3333  | 92.3077  | 4.3870  | 0.0020 |
| 66  | spliceosome assembly                                                                             | P | 10  | 25   | 30   | 40.0000  | 83.3333  | 3.7040  | 0.0020 |
| 67  | fatty acid biosynthesis                                                                          | P | 16  | 54   | 57   | 29.6296  | 94.7368  | 3.2610  | 0.0030 |
| 68  | glucose metabolism                                                                               | P | 25  | 100  | 135  | 25.0000  | 74.0741  | 3.1130  | 0.0030 |
| 69  | antigen presentation                                                                             | P | 15  | 52   | 63   | 28.8462  | 82.5397  | 3.0380  | 0.0030 |
| 70  | glycerol metabolism                                                                              | P | 7   | 15   | 19   | 46.6667  | 78.9474  | 3.6090  | 0.0040 |
| 71  | aldehyde metabolism                                                                              | P | 5   | 9    | 10   | 55.5556  | 90.0000  | 3.5600  | 0.0040 |
| 72  | ribosome biogenesis                                                                              | P | 21  | 79   | 84   | 26.5823  | 94.0476  | 3.1690  | 0.0040 |
| 73  | steroid metabolism                                                                               | P | 32  | 136  | 142  | 23.5294  | 95.7747  | 3.1410  | 0.0040 |
| 74  | amino acid biosynthesis                                                                          | P | 13  | 42   | 46   | 30.9524  | 91.3043  | 3.1210  | 0.0040 |
| 75  | protein import into nucleus                                                                      | P | 18  | 66   | 72   | 27.2727  | 91.6667  | 3.0570  | 0.0040 |
| 76  | mitochondrial electron transport\, ubiquinol to cytochrome c                                     | P | 3   | 3    | 5    | 100.0000 | 60.0000  | 4.2620  | 0.0050 |
| 77  | signal peptide processing                                                                        | P | 4   | 5    | 7    | 80.0000  | 71.4286  | 4.2200  | 0.0050 |
| 78  | pyrimidine nucleoside metabolism                                                                 | P | 5   | 9    | 24   | 55.5556  | 37.5000  | 3.5600  | 0.0050 |
| 79  | translational elongation                                                                         | P | 9   | 23   | 28   | 39.1304  | 82.1429  | 3.4330  | 0.0050 |
| 80  | antigen presentation\, exogenous antigen via MHC class II                                        | P | 5   | 10   | 12   | 50.0000  | 83.3333  | 3.2490  | 0.0050 |
| 81  | protein modification                                                                             | P | 245 | 1481 | 1665 | 16.5429  | 88.9490  | 2.7510  | 0.0050 |
| 82  | protein targeting to mitochondrion                                                               | P | 7   | 16   | 21   | 43.7500  | 76.1905  | 3.3930  | 0.0060 |
| 83  | triacylglycerol metabolism                                                                       | P | 6   | 14   | 14   | 42.8571  | 100.0000 | 3.0780  | 0.0060 |
| 84  | iron ion homeostasis                                                                             | P | 9   | 26   | 34   | 34.6154  | 76.4706  | 2.9900  | 0.0060 |
| 85  | proteolysis                                                                                      | P | 116 | 651  | 757  | 17.8187  | 85.9974  | 2.7240  | 0.0060 |
| 86  | translational termination                                                                        | P | 4   | 6    | 6    | 66.6667  | 100.0000 | 3.6870  | 0.0070 |
| 87  | fatty acid oxidation                                                                             | P | 10  | 32   | 32   | 31.2500  | 100.0000 | 2.7720  | 0.0070 |
| 88  | complement activation\, classical pathway                                                        | P | 8   | 22   | 25   | 36.3636  | 88.0000  | 2.9850  | 0.0080 |
| 89  | DNA catabolism                                                                                   | P | 5   | 11   | 12   | 45.4545  | 91.6667  | 2.9750  | 0.0080 |
| 90  | glycerol-3-phosphate metabolism                                                                  | P | 4   | 6    | 8    | 66.6667  | 75.0000  | 3.6870  | 0.0090 |
| 91  | positive regulation of nitric oxide biosynthesis                                                 | P | 3   | 4    | 4    | 75.0000  | 100.0000 | 3.4880  | 0.0090 |
| 92  | L-phenylalanine catabolism                                                                       | P | 4   | 7    | 7    | 57.1429  | 100.0000 | 3.2600  | 0.0090 |
| 93  | cytolysis                                                                                        | P | 7   | 19   | 20   | 36.8421  | 95.0000  | 2.8340  | 0.0090 |
| 94  | structural constituent of ribosome                                                               | F | 93  | 183  | 354  | 50.8197  | 51.6949  | 14.2990 | 0.0000 |
| 95  | oxidoreductase activity                                                                          | F | 198 | 663  | 775  | 29.8643  | 85.5484  | 11.8480 | 0.0000 |
| 96  | catalytic activity                                                                               | F | 871 | 4696 | 5420 | 18.5477  | 86.6421  | 10.3970 | 0.0000 |
| 97  | NADH dehydrogenase (ubiquinone) activity                                                         | F | 22  | 27   | 39   | 81.4815  | 69.2308  | 10.0350 | 0.0000 |
| 98  | NADH dehydrogenase activity                                                                      | F | 23  | 31   | 43   | 74.1936  | 72.0930  | 9.5890  | 0.0000 |
| 99  | electron carrier activity                                                                        | F | 36  | 67   | 80   | 53.7313  | 83.7500  | 9.3030  | 0.0000 |
| 100 | RNA binding                                                                                      | F | 132 | 466  | 548  | 28.3262  | 85.0365  | 8.8970  | 0.0000 |
| 101 | hydrogen ion transporter activity                                                                | F | 42  | 104  | 130  | 40.3846  | 80.0000  | 7.6890  | 0.0000 |
| 102 | rRNA binding                                                                                     | F | 12  | 15   | 18   | 80.0000  | 83.3333  | 7.3120  | 0.0000 |
| 103 | cytochrome-c oxidase activity                                                                    | F | 14  | 21   | 27   | 66.6667  | 77.7778  | 6.9000  | 0.0000 |
| 104 | hydrogen-transporting ATPase activity\, rotational mechanism                                     | F | 22  | 45   | 58   | 48.8889  | 77.5862  | 6.6850  | 0.0000 |
| 105 | translation regulator activity                                                                   | F | 44  | 127  | 151  | 34.6457  | 84.1060  | 6.6410  | 0.0000 |
| 106 | hydrogen-transporting ATP synthase activity\, rotational mechanism                               | F | 21  | 43   | 56   | 48.8372  | 76.7857  | 6.5250  | 0.0000 |
| 107 | threonine endopeptidase activity                                                                 | F | 12  | 18   | 21   | 66.6667  | 85.7143  | 6.3880  | 0.0000 |
| 108 | unfolded protein binding                                                                         | F | 47  | 146  | 159  | 32.1918  | 91.8239  | 6.2710  | 0.0000 |
| 109 | oxidoreductase activity\, acting on the CH-OH group of donors\, NAD or NADP as acceptor          | F | 34  | 95   | 108  | 35.7895  | 87.9630  | 6.0580  | 0.0000 |
| 110 | iron ion binding                                                                                 | F | 68  | 250  | 293  | 27.2000  | 85.3242  | 5.9530  | 0.0000 |
| 111 | hydrolase activity                                                                               | F | 354 | 1931 | 2234 | 18.3325  | 86.4369  | 5.6140  | 0.0000 |
| 112 | translation initiation factor activity                                                           | F | 25  | 66   | 86   | 37.8788  | 76.7442  | 5.5320  | 0.0000 |
| 113 | ubiquitin conjugating enzyme activity                                                            | F | 14  | 33   | 38   | 42.4242  | 86.8421  | 4.6570  | 0.0000 |
| 114 | isomerase activity                                                                               | F | 38  | 136  | 153  | 27.9412  | 88.8889  | 4.6230  | 0.0000 |
| 115 | electron transporter activity                                                                    | F | 46  | 175  | 195  | 26.2857  | 89.7436  | 4.6190  | 0.0000 |
| 116 | iron-sulfur cluster binding                                                                      | F | 11  | 24   | 25   | 45.8333  | 96.0000  | 4.4490  | 0.0000 |
| 117 | ATPase activity                                                                                  | F | 71  | 314  | 360  | 22.6115  | 87.2222  | 4.3310  | 0.0000 |
| 118 | ATPase activity\, coupled to transmembrane movement of substances                                | F | 36  | 134  | 158  | 26.8657  | 84.8101  | 4.2300  | 0.0000 |
| 119 | structural molecule activity                                                                     | F | 126 | 633  | 893  | 19.9052  | 70.8847  | 4.2230  | 0.0000 |
| 120 | hydrolase activity\, acting on acid anhydrides\, catalyzing transmembrane movement of substances | F | 36  | 136  | 161  | 26.4706  | 84.4721  | 4.1290  | 0.0000 |
| 121 | NAD binding                                                                                      | F | 12  | 30   | 53   | 40.0000  | 56.6038  | 4.0590  | 0.0000 |
| 122 | nucleoside-triphosphatase activity                                                               | F | 102 | 500  | 565  | 20.4000  | 88.4956  | 4.0580  | 0.0000 |
| 123 | ubiquitin-protein ligase activity                                                                | F | 51  | 219  | 259  | 23.2877  | 84.5560  | 3.8940  | 0.0000 |
| 124 | ATPase activity\, coupled                                                                        | F | 58  | 267  | 301  | 21.7229  | 88.7043  | 3.5670  | 0.0000 |
| 125 | lipid transporter activity                                                                       | F | 18  | 60   | 65   | 30.0000  | 92.3077  | 3.5210  | 0.0000 |
| 126 | nitric-oxide synthase regulator activity                                                         | F | 5   | 5    | 6    | 100.0000 | 83.3333  | 5.5020  | 0.0010 |
| 127 | RNA splicing factor activity\, transesterification mechanism                                     | F | 9   | 20   | 23   | 45.0000  | 86.9565  | 3.9540  | 0.0010 |
| 128 | ligase activity                                                                                  | F | 79  | 382  | 449  | 20.6806  | 85.0780  | 3.6920  | 0.0010 |
| 129 | protein serine/threonine phosphatase activity                                                    | F | 12  | 33   | 36   | 36.3636  | 91.6667  | 3.6580  | 0.0010 |
| 130 | hydrolase activity\, acting on ester bonds                                                       | F | 111 | 583  | 680  | 19.0395  | 85.7353  | 3.4340  | 0.0010 |
| 131 | arylesterase activity                                                                            | F | 3   | 3    | 3    | 100.0000 | 100.0000 | 4.2620  | 0.0020 |
| 132 | protein transporter activity                                                                     | F | 31  | 120  | 132  | 25.8333  | 90.9091  | 3.6750  | 0.0020 |
| 133 | magnesium ion binding                                                                            | F | 54  | 254  | 273  | 21.2598  | 93.0403  | 3.2640  | 0.0020 |
| 134 | S-adenosylmethionine-dependent methyltransferase activity                                        | F | 20  | 78   | 87   | 25.6410  | 89.6552  | 2.9100  | 0.0020 |
| 135 | SUMO conjugating enzyme activity                                                                 | F | 3   | 3    | 6    | 100.0000 | 50.0000  | 4.2620  | 0.0030 |
| 136 | translation release factor activity\, codon specific                                             | F | 3   | 3    | 3    | 100.0000 | 100.0000 | 4.2620  | 0.0030 |
| 137 | ubiquinol-cytochrome-c reductase activity                                                        | F | 5   | 8    | 11   | 62.5000  | 72.7273  | 3.9190  | 0.0030 |
| 138 | acyl-CoA dehydrogenase activity                                                                  | F | 7   | 16   | 16   | 43.7500  | 100.0000 | 3.3930  | 0.0030 |
| 139 | protein-L-isoaspartate (D-aspartate) O-methyltransferase activity                                | F | 3   | 3    | 3    | 100.0000 | 100.0000 | 4.2620  | 0.0040 |
| 140 | signal sequence binding                                                                          | F | 7   | 17   | 17   | 41.1765  | 100.0000 | 3.1930  | 0.0040 |
| 141 | selenium binding                                                                                 | F | 9   | 25   | 27   | 36.0000  | 92.5926  | 3.1310  | 0.0040 |
| 142 | protein phosphatase type 1 activity                                                              | F | 5   | 9    | 10   | 55.5556  | 90.0000  | 3.5600  | 0.0050 |
| 143 | voltage-gated ion-selective channel activity                                                     | F | 3   | 4    | 5    | 75.0000  | 80.0000  | 3.4880  | 0.0070 |
| 144 | microtubule binding                                                                              | F | 12  | 42   | 44   | 28.5714  | 95.4545  | 2.6780  | 0.0070 |
| 145 | monooxygenase activity                                                                           | F | 24  | 105  | 128  | 22.8571  | 82.0313  | 2.5590  | 0.0070 |
| 146 | nuclear localization sequence binding                                                            | F | 4   | 7    | 7    | 57.1429  | 100.0000 | 3.2600  | 0.0080 |
| 147 | glutathione transferase activity                                                                 | F | 8   | 21   | 26   | 38.0952  | 80.7692  | 3.1440  | 0.0080 |
| 148 | MHC class II receptor activity                                                                   | F | 4   | 7    | 11   | 57.1429  | 63.6364  | 3.2600  | 0.0090 |
| 149 | ubiquitin binding                                                                                | F | 4   | 8    | 9    | 50.0000  | 88.8889  | 2.9050  | 0.0090 |
| 150 | cytoplasm                                                                                        | C | 863 | 3488 | 3969 | 24.7420  | 87.8811  | 20.4670 | 0.0000 |
| 151 | mitochondrion                                                                                    | C | 279 | 730  | 822  | 38.2192  | 88.8078  | 19.1000 | 0.0000 |

|     |                                                                |   |      |      |      |          |          |         |        |
|-----|----------------------------------------------------------------|---|------|------|------|----------|----------|---------|--------|
| 152 | intracellular                                                  | C | 1299 | 6945 | 8118 | 18.7041  | 85.5506  | 14.8610 | 0.0000 |
| 153 | ribonucleoprotein complex                                      | C | 143  | 355  | 550  | 40.2817  | 64.5455  | 14.2720 | 0.0000 |
| 154 | ribosome                                                       | C | 90   | 176  | 345  | 51.1364  | 51.0145  | 14.1410 | 0.0000 |
| 155 | protein complex                                                | C | 435  | 1754 | 2202 | 24.8005  | 79.6549  | 13.5870 | 0.0000 |
| 156 | mitochondrial envelope                                         | C | 117  | 280  | 329  | 41.7857  | 85.1064  | 13.3710 | 0.0000 |
| 157 | mitochondrial inner membrane                                   | C | 100  | 232  | 275  | 43.1035  | 84.3636  | 12.7310 | 0.0000 |
| 158 | organelle inner membrane                                       | C | 104  | 250  | 294  | 41.6000  | 85.0340  | 12.5360 | 0.0000 |
| 159 | cytosol                                                        | C | 111  | 345  | 383  | 32.1739  | 90.0783  | 9.6970  | 0.0000 |
| 160 | small ribosomal subunit                                        | C | 23   | 32   | 45   | 71.8750  | 71.1111  | 9.3670  | 0.0000 |
| 161 | proteasome complex (sensu Eukaryota)                           | C | 25   | 38   | 42   | 65.7895  | 90.4762  | 9.1330  | 0.0000 |
| 162 | endoplasmic reticulum                                          | C | 137  | 529  | 561  | 25.8979  | 94.2959  | 7.8700  | 0.0000 |
| 163 | cytosolic small ribosomal subunit (sensu Eukaryota)            | C | 12   | 14   | 16   | 85.7143  | 87.5000  | 7.6770  | 0.0000 |
| 164 | mitochondrial matrix                                           | C | 32   | 74   | 76   | 43.2432  | 97.3684  | 7.1860  | 0.0000 |
| 165 | large ribosomal subunit                                        | C | 17   | 29   | 42   | 58.6207  | 69.0476  | 6.8680  | 0.0000 |
| 166 | proton-transporting two-sector ATPase complex                  | C | 23   | 47   | 61   | 48.9362  | 77.0492  | 6.8420  | 0.0000 |
| 167 | mitochondrial ribosome                                         | C | 19   | 35   | 37   | 54.2857  | 94.5946  | 6.8100  | 0.0000 |
| 168 | mitochondrial electron transport chain                         | C | 17   | 30   | 40   | 56.6667  | 75.0000  | 6.6780  | 0.0000 |
| 169 | cytosolic large ribosomal subunit (sensu Eukaryota)            | C | 10   | 13   | 18   | 76.9231  | 72.2222  | 6.4880  | 0.0000 |
| 170 | microsome                                                      | C | 46   | 138  | 148  | 33.3333  | 93.2432  | 6.4810  | 0.0000 |
| 171 | proteasome core complex (sensu Eukaryota)                      | C | 11   | 18   | 21   | 61.1111  | 85.7143  | 5.7120  | 0.0000 |
| 172 | peroxisome                                                     | C | 26   | 68   | 71   | 38.2353  | 95.7747  | 5.7000  | 0.0000 |
| 173 | proton-transporting ATP synthase complex, coupling factor F(o) | C | 6    | 8    | 13   | 75.0000  | 61.5385  | 4.9330  | 0.0000 |
| 174 | respiratory chain complex I (sensu Eukaryota)                  | C | 6    | 8    | 14   | 75.0000  | 57.1429  | 4.9330  | 0.0000 |
| 175 | membrane attack complex                                        | C | 4    | 4    | 6    | 100.0000 | 66.6667  | 4.9210  | 0.0000 |
| 176 | endoplasmic reticulum membrane                                 | C | 32   | 104  | 109  | 30.7692  | 95.4128  | 4.8680  | 0.0000 |
| 177 | peroxisomal membrane                                           | C | 10   | 21   | 22   | 47.6191  | 95.4545  | 4.3960  | 0.0000 |
| 178 | eukaryotic translation initiation factor 3 complex             | C | 4    | 5    | 5    | 80.0000  | 100.0000 | 4.2200  | 0.0000 |
| 179 | membrane fraction                                              | C | 117  | 588  | 630  | 19.8980  | 93.3333  | 4.0580  | 0.0000 |
| 180 | vacuole                                                        | C | 34   | 141  | 148  | 24.1135  | 95.2703  | 3.3990  | 0.0000 |
| 181 | signal recognition particle (sensu Eukaryota)                  | C | 6    | 10   | 12   | 60.0000  | 83.3333  | 4.1550  | 0.0010 |
| 182 | mitochondrial intermembrane space                              | C | 5    | 8    | 14   | 62.5000  | 57.1429  | 3.9190  | 0.0010 |
| 183 | integral to endoplasmic reticulum membrane                     | C | 12   | 34   | 35   | 35.2941  | 97.1429  | 3.5340  | 0.0010 |
| 184 | ubiquitin ligase complex                                       | C | 36   | 152  | 182  | 23.6842  | 83.5165  | 3.3770  | 0.0010 |
| 185 | mitochondrial outer membrane                                   | C | 11   | 30   | 33   | 36.6667  | 90.9091  | 3.5350  | 0.0020 |
| 186 | mitochondrial small ribosomal subunit                          | C | 6    | 9    | 9    | 66.6667  | 100.0000 | 4.5160  | 0.0030 |
| 187 | clathrin vesicle coat                                          | C | 12   | 36   | 40   | 33.3333  | 90.0000  | 3.2990  | 0.0030 |
| 188 | proteasome regulatory particle (sensu Eukaryota)               | C | 4    | 6    | 7    | 66.6667  | 85.7143  | 3.6870  | 0.0040 |
| 189 | Golgi apparatus                                                | C | 82   | 436  | 471  | 18.8073  | 92.5690  | 2.8130  | 0.0040 |
| 190 | proton-transporting ATP synthase complex (sensu Eukaryota)     | C | 5    | 8    | 10   | 62.5000  | 80.0000  | 3.9190  | 0.0050 |
| 191 | proton-transporting ATP synthase complex, catalytic core F(1)  | C | 4    | 6    | 6    | 66.6667  | 100.0000 | 3.6870  | 0.0050 |
| 192 | histone deacetylase complex                                    | C | 8    | 22   | 26   | 36.3636  | 84.6154  | 2.9850  | 0.0050 |
| 193 | nucleolus                                                      | C | 29   | 133  | 147  | 21.8045  | 90.4762  | 2.5330  | 0.0080 |

**DOWN-REGULATED - GENMAPP**

| No. | MAPP Name                                         | Number Changed | Number Measured | Number on MAPP | Percent Changed | Percent Present | Z Score | Permuted P Value |
|-----|---------------------------------------------------|----------------|-----------------|----------------|-----------------|-----------------|---------|------------------|
| 1   | Mm_Cholesterol_Biosynthesis                       | 4              | 15              | 15             | 26.6667         | 100.0000        | 5.2800  | 0.0010           |
| 2   | Mm_Translation_Factors                            | 7              | 49              | 50             | 14.2857         | 98.0000         | 4.5490  | 0.0020           |
| 3   | Mm_Urea_cycle_and_metabolism_of_amino_groups_KEGG | 4              | 19              | 20             | 21.0526         | 95.0000         | 4.5300  | 0.0030           |
| 4   | Mm_Nucleotide_sugars_metabolism                   | 2              | 5               | 33             | 40.0000         | 15.1515         | 4.7680  | 0.0050           |

**DOWN-REGULATED - GENE ONTOLOGY**

| No. | GO Name                                           | GO Type | Number Changed | Number Measured | Number in GO | Percent Changed | Percent Present | Z Score | Permuted P Value |
|-----|---------------------------------------------------|---------|----------------|-----------------|--------------|-----------------|-----------------|---------|------------------|
| 1   | RNA processing                                    | P       | 23             | 329             | 371          | 6.9909          | 88.6792         | 4.9880  | 0.0000           |
| 2   | metabolism                                        | P       | 225            | 6719            | 7938         | 3.3487          | 84.6435         | 4.9470  | 0.0000           |
| 3   | biosynthesis                                      | P       | 51             | 1154            | 1428         | 4.4194          | 80.8123         | 3.9410  | 0.0000           |
| 4   | proteolysis                                       | P       | 30             | 651             | 757          | 4.6083          | 85.9974         | 3.2150  | 0.0030           |
| 5   | rRNA processing                                   | P       | 6              | 65              | 70           | 9.2308          | 92.8571         | 3.3270  | 0.0050           |
| 6   | regulation of translational initiation            | P       | 4              | 30              | 30           | 13.3333         | 100.0000        | 3.6620  | 0.0070           |
| 7   | protein transport                                 | P       | 26             | 590             | 654          | 4.4068          | 90.2141         | 2.7420  | 0.0080           |
| 8   | amino acid metabolism                             | P       | 13             | 245             | 273          | 5.3061          | 89.7436         | 2.6320  | 0.0080           |
| 9   | binding                                           | F       | 280            | 9121            | 10565        | 3.0698          | 86.3322         | 4.1930  | 0.0000           |
| 10  | nucleotide binding                                | F       | 72             | 1754            | 1959         | 4.1049          | 89.5355         | 4.0940  | 0.0000           |
| 11  | zinc ion binding                                  | F       | 62             | 1560            | 1866         | 3.9744          | 83.6013         | 3.4920  | 0.0000           |
| 12  | RNA binding                                       | F       | 23             | 466             | 548          | 4.9356          | 85.0365         | 3.1500  | 0.0000           |
| 13  | peptide antigen binding                           | F       | 3              | 12              | 12           | 25.0000         | 100.0000        | 4.8390  | 0.0010           |
| 14  | catalytic activity                                | F       | 153            | 4696            | 5420         | 3.2581          | 86.6421         | 3.2270  | 0.0010           |
| 15  | gamma-aminobutyric acid:sodium symporter activity | F       | 2              | 4               | 4            | 50.0000         | 100.0000        | 5.9150  | 0.0030           |
| 16  | ATP binding                                       | F       | 45             | 1184            | 1331         | 3.8007          | 88.9557         | 2.6110  | 0.0070           |
| 17  | thyroid hormone receptor binding                  | F       | 3              | 17              | 18           | 17.6471         | 94.4444         | 3.8660  | 0.0080           |
| 18  | steroid hormone receptor activity                 | F       | 5              | 49              | 50           | 10.2041         | 98.0000         | 3.3130  | 0.0090           |
| 19  | intracellular                                     | C       | 232            | 6943            | 8118         | 3.3415          | 85.5260         | 5.0490  | 0.0000           |
| 20  | cytoplasm                                         | C       | 127            | 3488            | 3969         | 3.6411          | 87.8811         | 4.2440  | 0.0000           |
| 21  | nucleolus                                         | C       | 10             | 133             | 147          | 7.5188          | 90.4762         | 3.5320  | 0.0010           |
| 22  | protein complex                                   | C       | 67             | 1752            | 2202         | 3.8242          | 79.5640         | 3.3100  | 0.0010           |
| 23  | nucleus                                           | C       | 112            | 3283            | 3798         | 3.4115          | 86.4402         | 3.1490  | 0.0030           |
| 24  | RNA polymerase I transcription factor complex     | C       | 2              | 5               | 5            | 40.0000         | 100.0000        | 5.2170  | 0.0040           |

TABLE A3

| GENES UP-REGULATED BY THE ATHEROGENIC DIET IN SPLEENS |            |             |               |             |                                                                                                                            |
|-------------------------------------------------------|------------|-------------|---------------|-------------|----------------------------------------------------------------------------------------------------------------------------|
| TargetID                                              | Diff_Score | Fold_Change | Symbol        | Accession   | Definition                                                                                                                 |
| scl21429.6_290-S                                      | 180.1715   | 2.48        | Lmo4          | NM_010723.2 | Mus musculus LIM domain only 4 (Lmo4), mRNA.                                                                               |
| scl24880.7_98-S                                       | 144.5229   | 1.99        | Sfrs4         | NM_020587.1 | Mus musculus splicing factor, arginine/serine-rich 4 (Sfrp75) (Sfrs4), mRNA.                                               |
| scl24261.12.1_29-S                                    | 136.2332   | 1.88        | Alad          | NM_008525.3 | Mus musculus aminolevulinate, delta-, dehydratase (Alad), mRNA.                                                            |
| scl43920.5.585_30-S                                   | 127.4582   | 2.24        | Dok3          | NM_013739.1 |                                                                                                                            |
| scl28709.9_141-S                                      | 126.4749   | 2.11        | Abtb1         | NM_030251.1 | Mus musculus ankyrin repeat and BTB (POZ) domain containing 1 (Abtb1), mRNA.                                               |
| scl022190.1_154-S                                     | 123.464    | 1.84        | Ubc           | XM_147315.1 | Mus musculus ubiquitin C (Ubc), mRNA.                                                                                      |
| gl_21070949_ref NM 01                                 | 122.4365   | 1.84        | Ubc           | XM_147315.1 | Mus musculus ubiquitin C (Ubc), mRNA.                                                                                      |
| scl019982.5_48-S                                      | 121.8057   | 1.81        | Rpl36a        | NM_019865.2 | Mus musculus ribosomal protein L36a (Rpl36a), mRNA.                                                                        |
| scl0012846.1_253-S                                    | 121.2994   | 1.87        | Comt          | XM_147265.1 | Mus musculus catechol-O-methyltransferase (Comt), mRNA.                                                                    |
| scl067684.2_37-S                                      | 113.8468   | 1.81        | 3300001P08Rik | NM_026313.1 | Mus musculus RIKEN cDNA 3300001P08 gene (3300001P08Rik), mRNA.                                                             |
| scl00319171.1_322-S                                   | 113.8282   | 1.99        | Hist1h2ao     | NM_178185.1 | Mus musculus histone 1, H2ao (Hist1h2ao), mRNA.                                                                            |
| scl50103.16_203-S                                     | 112.5177   | 1.83        | Mtch1         | NM_019880.2 | Mus musculus mitochondrial carrier homolog 1 (C. elegans) (Mtch1), mRNA.                                                   |
| scl51536.11_7-S                                       | 107.3017   | 1.84        | Etf1          | NM_144866.2 | Mus musculus eukaryotic translation termination factor 1 (Etf1), mRNA.                                                     |
| scl00192197.1_323-S                                   | 105.4942   | 1.98        | Bcas3         | NM_138681.2 | Mus musculus breast carcinoma amplified sequence 3 (Bcas3), mRNA.                                                          |
| scl018786.2_1-S                                       | 103.8338   | 1.85        | Plaa          | NM_172695.1 | Mus musculus phospholipase A2, activating protein (Plaa), mRNA.                                                            |
| scl0326622.12_322-S                                   | 102.1663   | 2.17        | Upf2          | XM_140801.3 | Mus musculus UPF2 regulator of nonsense transcripts homolog (yeast) (Upf2), mRNA.                                          |
| scl0214290.2_34-S                                     | 101.725    | 1.99        | Zcchc6        | NM_153538.1 | Mus musculus zinc finger, CCHC domain containing 6 (Zcchc6), mRNA.                                                         |
| scl00230249.2_159-S                                   | 99.8888    | 1.84        | AI314180      | NM_172381.2 | Mus musculus expressed sequence AI314180 (AI314180), mRNA.                                                                 |
| scl21063.24_624-S                                     | 98.3369    | 1.91        | Golga2        | NM_133852.1 | Mus musculus golgi autoantigen, golgin subfamily a, 2 (Golga2), mRNA.                                                      |
| scl37402.3_73-S                                       | 98.2764    | 1.82        | Sas           | NM_025982   | Mus musculus sarcoma amplified sequence (Sas), mRNA.                                                                       |
| scl41018.11_650-S                                     | 98.135     | 1.85        | BC034054      | NM_178049.2 | Mus musculus cDNA sequence BC034054 (BC034054), mRNA.                                                                      |
| scl022218.1_29-S                                      | 96.9332    | 1.7         | Sumo1         | NM_009460.1 |                                                                                                                            |
| GI_21070949-S                                         | 96.7979    | 1.74        | Ubc           | NM_019639.2 | Mus musculus ubiquitin C (Ubc), mRNA.                                                                                      |
| scl27412.8.1_4-S                                      | 96.439     | 1.87        | Tpst2         | NM_009419   | Mus musculus protein-tyrosine sulfotransferase 2 (Tpst2), mRNA.                                                            |
| scl0004093.1_54-S                                     | 96.2774    | 3.37        | Mcm7          | NM_008568.1 | Mus musculus minichromosome maintenance deficient 7 (S. cerevisiae) (Mcm7), mRNA.                                          |
| scl20297.9_280-S                                      | 94.7301    | 1.69        | Ptpns1        | XM_149178.1 | Mus musculus protein tyrosine phosphatase, non-receptor type substrate 1 (Ptpns1), mRNA.                                   |
| scl50160.5.1_23-S                                     | 94.0495    | 1.78        | BC008155      | NM_145410.1 | Mus musculus cDNA sequence BC008155 (BC008155), mRNA.                                                                      |
| scl35001.15_103-S                                     | 93.2162    | 1.95        | Plekha2       | NM_031257.2 | Mus musculus pleckstrin homology domain-containing, family A (phosphoinositide binding specific) member 2 (Plekha2), mRNA. |
| scl0003150.1_14-S                                     | 92.4713    | 4.56        | Golga2        | NM_133852.1 | Mus musculus golgi autoantigen, golgin subfamily a, 2 (Golga2), mRNA.                                                      |
| scl00227682.2_166-S                                   | 91.1387    | 2.62        | G430055L02Rik | NM_145520.2 |                                                                                                                            |
| scl00215751.1_299-S                                   | 91.1283    | 1.91        | BC013529      | NM_145418.1 | Mus musculus cDNA sequence BC013529 (BC013529), mRNA.                                                                      |
| scl0067379.1_289-S                                    | 91.0477    | 1.77        | Dedd2         | NM_207677.1 | Mus musculus death effector domain-containing DNA binding protein 2 (Dedd2), transcript variant 2, mRNA.                   |
| scl0015183.2_163-S                                    | 90.7275    | 1.99        | Hdac3         | NM_010411.1 | Mus musculus histone deacetylase 3 (Hdac3), mRNA.                                                                          |
| scl0002552.1_594-S                                    | 90.4584    | 1.96        | Triobp        | NM_138579.2 | Mus musculus TRIO and F-actin binding protein (Triobp), mRNA.                                                              |
| scl41012.9.1_84-S                                     | 89.1561    | 1.67        | Ugalt2        | NM_016752.1 | Mus musculus UDP-galactose translocator 2 (Ugalt2), mRNA.                                                                  |
| scl012864.3_58-S                                      | 88.1809    | 1.72        | Cox6c         | NM_053071.1 | Mus musculus cytochrome c oxidase, subunit VIc (Cox6c), mRNA.                                                              |
| scl019244.5_2-S                                       | 87.2207    | 1.64        | Ptp4a2        | NM_008974.2 | Mus musculus protein tyrosine phosphatase 4a2 (Ptp4a2), mRNA.                                                              |
| scl47805.7_5-S                                        | 86.52      | 1.77        | Grina         | NM_023168.2 | Mus musculus glutamate receptor, ionotropic, N-methyl D-aspartate-associated protein 1 (glutamate binding) (Grina), mRNA.  |
| scl41300.23_511-S                                     | 85.6059    | 2.13        | Atp2a3        | NM_016745.2 | Mus musculus ATPase, Ca++ transporting, ubiquitous (Atp2a3), mRNA.                                                         |
| scl39318.8_348-S                                      | 84.4304    | 1.79        | Wbp2          | NM_016852.1 | Mus musculus WW domain binding protein 2 (Wbp2), mRNA.                                                                     |
| scl0064934.1_269-S                                    | 84.2458    | 2.51        | Pes1          | NM_022889.2 | Mus musculus pescadillo homolog 1, containing BRCT domain (zebrafish) (Pes1), mRNA.                                        |
| scl00239743.2_208-S                                   | 81.4228    | 1.76        | Kihl6         | NM_183390.1 | Mus musculus kelch-like 6 (Drosophila) (Kihl6), mRNA.                                                                      |
| scl0055943.1_284-S                                    | 81.3076    | 1.88        | Stx8          | NM_018768.1 | Mus musculus syntaxin 8 (Stx8), mRNA.                                                                                      |
| scl33408.13_324-S                                     | 81.2314    | 1.7         | Ctcf          | NM_007794.1 | Mus musculus CCCTC-binding factor (Ctcf), mRNA.                                                                            |
| scl023849.4_8-S                                       | 79.8854    | 2.17        | Copeb         | NM_011803.1 | Mus musculus core promoter element binding protein (Copeb), mRNA.                                                          |
| scl50763.13.1_199-S                                   | 79.8823    | 1.89        | Flot1         | NM_008027.1 | Mus musculus flotillin 1 (Flot1), mRNA.                                                                                    |
| scl0104771.9_30-S                                     | 79.3192    | 1.93        | 1200003C05Rik | NM_024205.1 | Mus musculus RIKEN cDNA 1200003C05 gene (1200003C05Rik), mRNA.                                                             |
| scl0069654.1_290-S                                    | 79.2864    | 1.61        | Dctn2         | NM_027151.1 | Mus musculus dynactin 2 (Dctn2), mRNA.                                                                                     |
| scl45683.9_474-S                                      | 78.5062    | 1.75        | 5730469M10Rik | NM_027464   | Mus musculus RIKEN cDNA 5730469M10 gene (5730469M10Rik), mRNA.                                                             |
| scl41358.1_245-S                                      | 78.3159    | 1.87        | 1810027O10Rik | XM_109683.4 | Mus musculus RIKEN cDNA 1810027O10 gene (1810027O10Rik), mRNA.                                                             |
| scl52614.18.1_13-S                                    | 77.982     | 1.66        | D19Bwg1357e   | NM_177474.2 | Mus musculus DNA segment, Chr 19, Brigham & Womens Genetics 1357 expressed (D19Bwg1357e), mRNA.                            |
| scl066840.3_20-S                                      | 77.4476    | 3.75        | 0610008N23Rik | NM_025793.1 |                                                                                                                            |
| scl22011.14.1179_292-S                                | 77.0891    | 1.74        | 6330505N24Rik | XM_130991.3 |                                                                                                                            |

|                       |         |      |               |             |                                                                                                                             |
|-----------------------|---------|------|---------------|-------------|-----------------------------------------------------------------------------------------------------------------------------|
| scl011544.1 20-S      | 76.3655 | 1.63 | Adprh         | NM_007414.2 | Mus musculus ADP-ribosylarginine hydrolase (Adprh), mRNA.                                                                   |
| scl0012848.2 316-S    | 76.3185 | 1.81 | Cops2         | NM_009939.1 | Mus musculus COP9 (constitutive photomorphogenic) homolog, subunit 2 (Arabidopsis thaliana) (Cops2), mRNA.                  |
| scl075786.2 11-S      | 76.2723 | 5.76 | 4930432B04Rik | XM_130287.5 | Mus musculus RIKEN cDNA 4930432B04 gene (4930432B04Rik), mRNA.                                                              |
| scl0017859.1 306-S    | 76.1169 | 1.75 | Mxi1          | NM_010847.1 | Mus musculus Max interacting protein 1 (Mxi1), mRNA.                                                                        |
| scl30036.21 295-S     | 75.7934 | 1.79 | Tax1bp1       | NM_025816.1 | Mus musculus Tax1 (human T-cell leukemia virus type I) binding protein 1 (Tax1bp1), mRNA.                                   |
| scl29636.20.1 18-S    | 75.4743 | 1.78 | 1110061O04Rik | NM_026849   | Mus musculus RIKEN cDNA 1110061O04 gene (1110061O04Rik), mRNA.                                                              |
| scl34266.7 421-S      | 75.0922 | 1.73 | 2700067E09Rik | NM_175185.2 | Mus musculus RIKEN cDNA 2700067E09 gene (2700067E09Rik), mRNA.                                                              |
| scl26191.2 17-S       | 74.8581 | 1.65 | Selp1         | NM_009151.2 | Mus musculus selectin, platelet (p-selectin) ligand (Selp1), mRNA.                                                          |
| scl011964.1 274-S     | 74.8038 | 1.72 | Atp6v1a1      | NM_007508.2 | Mus musculus ATPase, H+ transporting, V1 subunit A, isoform 1 (Atp6v1a1), mRNA.                                             |
| scl0227290.1 240-S    | 74.7304 | 1.61 | Aamp          | NM_146110.1 | Mus musculus angio-associated migratory protein (Aamp), mRNA.                                                               |
| scl24399.13 176-S     | 74.4773 | 1.84 | Gba2          | NM_172692.1 | Mus musculus glucosidase beta 2 (Gba2), mRNA.                                                                               |
| scl32033.10.26 108-S  | 74.3831 | 1.63 | BC006909      | NM_145589.2 | Mus musculus cDNA sequence BC006909 (BC006909), mRNA.                                                                       |
| scl24433.7.1 53-S     | 72.3243 | 1.69 | Bag1          | NM_009736.1 | Mus musculus Bcl2-associated athanogene 1 (Bag1), mRNA.                                                                     |
| scl23771.9.1 58-S     | 71.5908 | 1.65 | Eif3s2        | NM_018799.1 | Mus musculus eukaryotic translation initiation factor 3, subunit 2 (beta) (Eif3s2), mRNA.                                   |
| scl00213484.2 217-S   | 71.3883 | 1.85 | BC036718      | NM_153136.1 | Mus musculus cDNA sequence BC036718 (BC036718), mRNA.                                                                       |
| scl067905.1 18-S      | 70.8503 | 1.62 | 2810423O19Rik | NM_026447   | Mus musculus RIKEN cDNA 2810423O19 gene (2810423O19Rik), transcript variant 1, mRNA.                                        |
| scl000063.1 0-S       | 70.7269 | 2.06 | Nit1          | NM_012049.1 | Mus musculus nitrilase 1 (Nit1), mRNA.                                                                                      |
| scl012366.11 305-S    | 70.2833 | 1.59 | Casp2         | NM_007610.1 | Mus musculus caspase 2 (Casp2), mRNA.                                                                                       |
| scl068195.1 129-S     | 70.1945 | 1.55 | Rnaset2       | NM_026611.1 | Mus musculus ribonuclease T2 (Rnaset2), mRNA.                                                                               |
| scl51735.42.647 134-S | 69.818  | 2.04 | 5430411K18Rik | XM_140491.4 | Mus musculus RIKEN cDNA 5430411K18 gene (5430411K18Rik), mRNA.                                                              |
| scl43073.2 375-S      | 69.5982 | 2.42 | Hspa2         | NM_008301.2 | Mus musculus heat shock protein 2 (Hspa2), mRNA.                                                                            |
| scl022793.9 329-S     | 69.4671 | 1.79 | Zyx           | NM_011777.1 | Mus musculus zyxin (Zyx), mRNA.                                                                                             |
| scl0216792.1 314-S    | 68.2324 | 1.85 | A230051G13Rik | NM_173785.2 |                                                                                                                             |
| scl0016599.2 295-S    | 67.7636 | 1.56 | Klf3          | NM_008453.2 | Mus musculus Kruppel-like factor 3 (basic) (Klf3), mRNA.                                                                    |
| scl40305.32 46-S      | 67.4939 | 1.77 | Cyfp2         | XM_147526.1 | Mus musculus cytoplasmic FMR1 interacting protein 2 (Cyfp2), mRNA.                                                          |
| scl00217864.2 195-S   | 67.2196 | 1.94 | D12Wsu95e     | NM_198023.1 | Mus musculus DNA segment, Chr 12, Wayne State University 95, expressed (D12Wsu95e), mRNA.                                   |
| scl068877.8 322-S     | 66.3113 | 1.54 | Maf1          | NM_026859.2 | Mus musculus MAF1 homolog (yeast) (Maf1), mRNA.                                                                             |
| scl067283.1 285-S     | 66.0702 | 1.91 | Slc25a19      | NM_026071.1 | Mus musculus solute carrier family 25 (mitochondrial deoxynucleotide carrier), member 19 (Slc25a19), mRNA.                  |
| scl36580.22.1 188-S   | 65.7725 | 1.55 | Copb2         | NM_015827.1 | Mus musculus coatmer protein complex, subunit beta 2 (beta prime) (Copb2), mRNA.                                            |
| scl48796.17 240-S     | 65.6931 | 2.29 | 2700067D09Rik | NM_028301.1 | Mus musculus RIKEN cDNA 2700067D09 gene (2700067D09Rik), mRNA.                                                              |
| scl0067673.1 322-S    | 65.2968 | 1.59 | Tceb2         | NM_026305.1 | Mus musculus transcription elongation factor B (SIII), polypeptide 2 (Tceb2), mRNA.                                         |
| scl21986.3.1 30-S     | 65.0483 | 2.23 | Apoa1bp       | NM_144897   | Mus musculus apolipoprotein A-I binding protein (Apoa1bp), mRNA.                                                            |
| scl0011677.2 223-S    | 65.0128 | 1.59 | Akr1b3        | NM_009658.2 | Mus musculus aldo-keto reductase family 1, member B3 (aldose reductase) (Akr1b3), mRNA.                                     |
| scl39506.28.1461 10-S | 64.8115 | 1.68 | Slc4a1        | NM_011403.1 | Mus musculus solute carrier family 4 (anion exchanger), member 1 (Slc4a1), mRNA.                                            |
| scl38917.7 7-S        | 64.7129 | 1.64 | Gja1          | NM_010288.2 | Mus musculus gap junction membrane channel protein alpha 1 (Gja1), mRNA.                                                    |
| scl0067590.2 244-S    | 64.4775 | 2.39 | 4930521E07Rik | NM_026260.2 | Mus musculus RIKEN cDNA 4930521E07 gene (4930521E07Rik), mRNA.                                                              |
| scl013728.1 329-S     | 64.2852 | 1.58 | Mark2         | NM_007928.1 | Mus musculus MAP/microtubule affinity-regulating kinase 2 (Mark2), mRNA.                                                    |
| scl022642.16 28-S     | 64.2714 | 2.21 | Zbtb17        | NM_009541.1 |                                                                                                                             |
| scl25133.32.1 60-S    | 64.2364 | 1.59 | Nrd1          | NM_146150.2 | Mus musculus nardilysin, N-arginine dibasic convertase, NRD convertase 1 (Nrd1), mRNA.                                      |
| scl52850.12 273-S     | 64.0154 | 1.66 | Rela          | NM_009045.2 | Mus musculus v-rel reticuloendotheliosis viral oncogene homolog A (avian) (Rela), mRNA.                                     |
| scl50203.3 209-S      | 63.8136 | 1.64 | Gfer          | NM_023040.2 | Mus musculus growth factor, erv1 (S. cerevisiae)-like (augmenter of liver regeneration) (Gfer), transcript variant 2, mRNA. |
| scl33269.35.1 230-S   | 63.5049 | 1.97 | Plcg2         | NM_172285.1 | Mus musculus phospholipase C, gamma 2 (Plcg2), mRNA.                                                                        |
| scl25917.6 37-S       | 63.5011 | 1.52 | Ywhag         | NM_018871.2 | Mus musculus 3-monooxygenase/tryptophan 5-monooxygenase activation protein, gamma polypeptide (Ywhag), mRNA.                |
| scl018022.1 253-S     | 63.3787 | 1.75 | Nfe2          | NM_008685.2 | Mus musculus nuclear factor, erythroid derived 2 (Nfe2), mRNA.                                                              |
| scl017169.9 120-S     | 63.3575 | 1.68 | Mark3         | NM_021516.1 | Mus musculus MAP/microtubule affinity-regulating kinase 3 (Mark3), mRNA.                                                    |
| scl48582.2 713-S      | 63.2558 | 3.1  | Gp5           | NM_008148.2 | Mus musculus glycoprotein 5 (platelet) (Gp5), mRNA.                                                                         |
| scl0021372.2 85-S     | 63.0921 | 2.11 | Tbl1x         | NM_020601.1 | Mus musculus transducin (beta)-like 1 X-linked (Tbl1x), mRNA.                                                               |
| scl51588.6 379-S      | 62.9236 | 1.59 | D030070L09Rik | NM_172625.1 | Mus musculus RIKEN cDNA D030070L09 gene (D030070L09Rik), mRNA.                                                              |
| scl29854.5.1 26-S     | 62.8378 | 1.55 | Aup1          | NM_007517.1 | Mus musculus ancient ubiquitous protein (Aup1), mRNA.                                                                       |
| scl0065111.1 63-S     | 62.448  | 1.54 | Dap3          | NM_022994.2 | Mus musculus death associated protein 3 (Dap3), mRNA.                                                                       |
| scl00212307.2 257-S   | 62.2433 | 1.82 | Mapre2        | NM_153058.2 | Mus musculus microtubule-associated protein, RP/EB family, member 2 (Mapre2), mRNA.                                         |
| scl0014897.1 159-S    | 62.0123 | 1.58 | Trip12        | NM_133975.2 |                                                                                                                             |
| scl0057261.1 145-S    | 61.993  | 1.67 | Brd4          | NM_020508.2 | Mus musculus bromodomain containing 4 (Brd4), mRNA.                                                                         |
| scl52908.26.6 30-S    | 61.7588 | 2.33 | 2610041P08Rik | NM_198008.1 | Mus musculus RIKEN cDNA 2610041P08 gene (2610041P08Rik), mRNA.                                                              |
| scl40468.10 17-S      | 61.7131 | 1.55 | 9130023F12Rik | NM_181411.2 | Mus musculus RIKEN cDNA 9130023F12 gene (9130023F12Rik), mRNA.                                                              |
| scl0066775.2 265-S    | 61.677  | 3.32 | 4933428I03Rik | NM_025760.2 | Mus musculus RIKEN cDNA 4933428I03 gene (4933428I03Rik), mRNA.                                                              |

|                      |         |       |               |             |                                                                                                                                          |
|----------------------|---------|-------|---------------|-------------|------------------------------------------------------------------------------------------------------------------------------------------|
| scl46775.6 475-S     | 61.5226 | 1.77  | Asb8          | NM_030121.2 | Mus musculus ankyrin repeat and SOCS box-containing protein 8 (Asb8), mRNA.                                                              |
| scl0170768.1 23-S    | 61.1346 | 1.69  | Pfkfb3        | NM_172976.1 | Mus musculus 6-phosphofructo-2-kinase/fructose-2,6-bisphosphatase 3 (Pfkfb3), mRNA.                                                      |
| scl0077480.1 264-S   | 61.0758 | 1.65  | C330002119Rik | XM_126866.5 |                                                                                                                                          |
| scl0105445.1 143-S   | 61.0003 | 2.43  | Dock9         | XM_358315.1 |                                                                                                                                          |
| scl0117599.1 293-S   | 60.7499 | 1.74  | Helb          | NM_080446.1 | Mus musculus helicase (DNA) B (Helb), mRNA.                                                                                              |
| scl35429.19.1 59-S   | 60.7196 | 1.56  | 1300017J02Rik | NM_027918.1 | Mus musculus RIKEN cDNA 1300017J02 gene (1300017J02Rik), mRNA.                                                                           |
| scl20431.14.1 58-S   | 60.6922 | 2.76  | 2310043D08Rik | XM_130428.2 |                                                                                                                                          |
| scl00109113.1 250-S  | 60.6331 | 1.56  | Uhrf2         | NM_144873.1 | Mus musculus ubiquitin-like, containing PHD and RING finger domains 2 (Uhrf2), mRNA.                                                     |
| scl26137.12 266-S    | 60.5946 | 1.56  | 2400003N08Rik | NM_178622.3 | Mus musculus RIKEN cDNA 2400003N08 gene (2400003N08Rik), mRNA.                                                                           |
| scl0067921.2 259-S   | 60.1835 | 1.61  | 2510010F15Rik | NM_026454.2 | Mus musculus RIKEN cDNA 2510010F15 gene (2510010F15Rik), mRNA.                                                                           |
| scl38677.11 311-S    | 59.9989 | 1.79  | Csnk1g2       | NM_134002.1 | Mus musculus casein kinase 1, gamma 2 (Csnk1g2), mRNA.                                                                                   |
| scl022333.10 87-S    | 59.2893 | 1.5   | Vdac1         | NM_011694   | Mus musculus voltage-dependent anion channel 1 (Vdac1), mRNA.                                                                            |
| scl50767.4 663-S     | 59.0844 | 1.57  | Nrm           | NM_134122.1 | Mus musculus nurim (nuclear envelope membrane protein) (Nrm), mRNA.                                                                      |
| scl36803.7 641-S     | 58.968  | 1.81  | Al449441      | NM_172453.1 | Mus musculus expressed sequence Al449441 (Al449441), mRNA.                                                                               |
| scl073122.1 292-S    | 58.9044 | 1.67  | 3110018K12Rik | XM_129857.4 | Mus musculus RIKEN cDNA 3110018K12 gene (3110018K12Rik), mRNA.                                                                           |
| scl26182.5 119-S     | 58.5998 | 1.7   | Gltpl         | NM_019821.2 | Mus musculus glycolipid transfer protein (Gltpl), mRNA.                                                                                  |
| scl43536.32 392-S    | 58.3743 | 1.72  | Ipo11         | NM_029665.2 | Mus musculus importin 11 (Ipo11), mRNA.                                                                                                  |
| scl0208606.2 109-S   | 57.8282 | 2.68  | 1500011J06Rik | XM_132343.3 |                                                                                                                                          |
| scl17286.15.1 2-S    | 57.384  | 6.28  | Selp          | NM_011347.1 | Mus musculus selectin, platelet (Selp), mRNA.                                                                                            |
| scl54639.14 151-S    | 57.3061 | 1.67  | Cstf2         | NM_133196.3 | Mus musculus cleavage stimulation factor, 3 pre-RNA subunit 2 (Cstf2), mRNA.                                                             |
| scl067865.1 323-S    | 57.1896 | 1.51  | Rgs10         | NM_026418.1 | Mus musculus regulator of G-protein signalling 10 (Rgs10), mRNA.                                                                         |
| scl24427.29 125-S    | 56.877  | 1.54  | Ubap2         | NM_026872.1 | Mus musculus ubiquitin-associated protein 2 (Ubap2), mRNA.                                                                               |
| scl34132.19.1 1-S    | 56.6508 | 1.72  | Stxbp2        | NM_011503.2 | Mus musculus syntaxin binding protein 2 (Stxbp2), mRNA.                                                                                  |
| scl42747.5 440-S     | 56.5765 | 1.77  | 6720458F09Rik | NM_177374.2 | Mus musculus RIKEN cDNA 6720458F09 gene (6720458F09Rik), mRNA.                                                                           |
| scl014057.6 27-S     | 56.5659 | 1.5   | Sfxn1         | NM_027324.2 | Mus musculus sideroflexin 1 (Sfxn1), mRNA.                                                                                               |
| scl38697.44.1 55-S   | 55.8142 | 1.76  | Abca7         | NM_013850.1 | Mus musculus ATP-binding cassette, sub-family A (ABC1), member 7 (Abca7), mRNA.                                                          |
| scl33146.4.49 0-S    | 55.6687 | 1.64  | Ndufa3        | NM_025348   | Mus musculus NADH dehydrogenase (ubiquinone) 1 alpha subcomplex, 3 (Ndufa3), mRNA.                                                       |
| scl068066.1 115-S    | 55.3543 | 1.46  | D11Ert333e    | NM_026542.1 |                                                                                                                                          |
| scl50197.1.198 198-S | 55.3465 | 1.66  | Fahd1         | NM_023480.1 |                                                                                                                                          |
| scl067049.4 280-S    | 55.3196 | 1.99  | Pus3          | NM_023292.2 |                                                                                                                                          |
| scl0269523.2 3-S     | 55.2191 | 1.47  | Vcp           | NM_009503.2 | Mus musculus valosin containing protein (Vcp), mRNA.                                                                                     |
| scl53441.6.1 144-S   | 55.1648 | 1.5   | Aip           | NM_016666   | Mus musculus aryl-hydrocarbon receptor-interacting protein (Aip), mRNA.                                                                  |
| scl49807.23 539-S    | 54.9198 | 2.42  | Tbc1d5        | NM_028162.2 | Mus musculus TBC1 domain family, member 5 (Tbc1d5), mRNA.                                                                                |
| scl0067899.2 259-S   | 54.9186 | 1.59  | 2010110K16Rik | NM_026442.2 | Mus musculus RIKEN cDNA 2010110K16 gene (2010110K16Rik), mRNA.                                                                           |
| scl0056738.1 278-S   | 54.6935 | 1.82  | Mocs1         | NM_020042.1 | Mus musculus molybdenum cofactor synthesis 1 (Mocs1), transcript variant 1, mRNA.                                                        |
| scl0098366.1 13-S    | 54.4521 | 1.48  | Smap1         | NM_028534.1 | Mus musculus stromal membrane-associated protein 1 (Smap1), mRNA.                                                                        |
| scl19927.15.1 16-S   | 54.274  | 1.5   | Dnttip1       | NM_133763.1 | Mus musculus deoxynucleotidyltransferase, terminal, interacting protein 1 (Dnttip1), mRNA.                                               |
| scl25806.10.1 16-S   | 54.0784 | 1.74  | Zdhhc4        | NM_028379.1 | Mus musculus zinc finger, DHHC domain containing 4 (Zdhhc4), mRNA.                                                                       |
| scl014897.1 33-S     | 53.9783 | 1.57  | Trip12        | NM_133975.2 |                                                                                                                                          |
| scl020715.6 281-S    | 53.9292 | 1.48  | Serpina3g     | XM_354694.1 | Mus musculus serine (or cysteine) proteinase inhibitor, clade A, member 3G (Serpina3g), mRNA.                                            |
| scl24928.17 534-S    | 53.7091 | 1.71  | Phc2          | NM_018774.1 | Mus musculus polyhomeotic-like 2 (Drosophila) (Phc2), mRNA.                                                                              |
| scl018641.1 29-S     | 53.5359 | 1.63  | Pfkl          | NM_008826.2 | Mus musculus phosphofructokinase, liver, B-type (Pfkl), mRNA.                                                                            |
| IGHV1S132 AF304552.1 | 53.4313 | 11.97 |               |             |                                                                                                                                          |
| scl019167.11 85-S    | 53.258  | 1.45  | Psma3         | NM_011184.2 | Mus musculus proteasome (prosome, macropain) subunit, alpha type 3 (Psma3), mRNA.                                                        |
| scl078325.1 150-S    | 53.2142 | 1.8   | 2700092H06Rik | XM_132529.2 | Mus musculus RIKEN cDNA 2700092H06 gene (2700092H06Rik), mRNA.                                                                           |
| scl19517.6 242-S     | 53.0912 | 1.56  | Surf4         | NM_011512.2 | Mus musculus surfeit gene 4 (Surf4), mRNA.                                                                                               |
| scl0067184.2 306-S   | 52.9858 | 1.61  | Grim19        | NM_023312.1 | Mus musculus genes associated with retinoid-IFN-induced mortality 19 (Grim19), mRNA.                                                     |
| scl37040.9 46-S      | 52.8404 | 1.67  | Dpagt1        | NM_007875.2 | Mus musculus dolichyl-phosphate (UDP-N-acetylglucosamine) acetylglucosaminophosphotransferase 1 (GlcNAc-1-P transferase) (Dpagt1), mRNA. |
| scl23930.5.1 96-S    | 52.8367 | 1.55  | Atp6v0b       | NM_033617.1 | Mus musculus ATPase, H+ transporting, V0 subunit B (Atp6v0b), mRNA.                                                                      |
| scl0080913.2 173-S   | 52.709  | 1.86  | Pum2          | NM_030723.1 | Mus musculus pumilio 2 (Drosophila) (Pum2), mRNA.                                                                                        |
| scl25096.6.1 229-S   | 52.4854 | 1.44  | Tal1          | NM_011527.1 | Mus musculus T-cell acute lymphocytic leukemia 1 (Tal1), mRNA.                                                                           |
| scl0078781.2 278-S   | 52.4528 | 1.63  | Zc3hav1       | NM_028864.1 | Mus musculus zinc finger CCCH type, antiviral 1 (Zc3hav1), mRNA.                                                                         |
| scl43457.5.1 29-S    | 52.4511 | 1.51  | Mirps30       | NM_021556.2 | Mus musculus mitochondrial ribosomal protein S30 (Mirps30), mRNA.                                                                        |
| scl40141.3 333-S     | 52.428  | 1.63  | 5730466P16Rik | NM_173453.1 | Mus musculus RIKEN cDNA 5730466P16 gene (5730466P16Rik), mRNA.                                                                           |
| scl39999.14.1 8-S    | 52.4172 | 2.71  | Alox12        | NM_007440.2 | Mus musculus arachidonate 12-lipoxygenase (Alox12), mRNA.                                                                                |
| scl0017765.2 254-S   | 52.3742 | 2.18  | Mtf2          | NM_013827.1 | Mus musculus metal response element binding transcription factor 2 (Mtf2), mRNA.                                                         |

|               |       |         |      |               |             |                                                                                                               |
|---------------|-------|---------|------|---------------|-------------|---------------------------------------------------------------------------------------------------------------|
| scl49175.14   | 151-S | 52.0357 | 2.02 | 6820449I09Rik | NM_177128.2 |                                                                                                               |
| scl0024135.1  | 295-S | 51.9898 | 1.91 | Zfp68         | NM_013844.1 | Mus musculus zinc finger protein 68 (Zfp68), mRNA.                                                            |
| scl27109.17.1 | 35-S  | 51.9055 | 1.58 | Plod3         | NM_011962.2 | Mus musculus procollagen-lysine, 2-oxoglutarate 5-dioxygenase 3 (Plod3), mRNA.                                |
| scl0020661.1  | 145-S | 51.8149 | 1.65 | Sort1         | NM_019972   | Mus musculus sortilin 1 (Sort1), mRNA.                                                                        |
| scl00320332.2 | 0-S   | 51.7236 | 3.28 | Hist4h4       | NM_175652.1 | Mus musculus histone 4, H4 (Hist4h4), mRNA.                                                                   |
| scl39617.28.1 | 49-S  | 51.5782 | 1.59 | Thrap4        | NM_011869.1 | Mus musculus thyroid hormone receptor associated protein 4 (Thrap4), mRNA.                                    |
| scl25126.19.1 | 29-S  | 51.4251 | 1.71 | Faf1          | NM_007983.2 | Mus musculus Fas-associated factor 1 (Faf1), mRNA.                                                            |
| scl23946.8.1  | 41-S  | 51.4078 | 1.43 | Urod          | NM_009478.1 | Mus musculus uroporphyrinogen decarboxylase (Urod), mRNA.                                                     |
| scl53904.6    | 21-S  | 51.2267 | 2.02 | Nsbp1         | NM_016710.1 | Mus musculus nucleosome binding protein 1 (Nsbp1), mRNA.                                                      |
| scl00214290.1 | 251-S | 51.1125 | 1.47 | Zcchc6        | NM_153538.1 | Mus musculus zinc finger, CCHC domain containing 6 (Zcchc6), mRNA.                                            |
| scl068152.6   | 9-S   | 50.9762 | 1.65 | 5830415L20Rik | NM_026583.2 | Mus musculus RIKEN cDNA 5830415L20 gene (5830415L20Rik), mRNA.                                                |
| scl020250.10  | 235-S | 50.9181 | 1.54 | Scd2          | NM_009128.1 | Mus musculus stearyl-Coenzyme A desaturase 2 (Scd2), mRNA.                                                    |
| scl072121.12  | 86-S  | 50.8009 | 1.81 | 2010308M01Rik | XM_131083.2 | Mus musculus RIKEN cDNA 2010308M01 gene (2010308M01Rik), mRNA.                                                |
| scl33743.13.1 | 0-S   | 50.677  | 1.7  | Sf4           | NM_027481.1 | Mus musculus splicing factor 4 (Sf4), mRNA.                                                                   |
| scl47734.11   | 199-S | 50.437  | 1.57 | Map3k7ip1     | NM_025609.2 | Mus musculus mitogen-activated protein kinase kinase kinase 7 interacting protein 1 (Map3k7ip1), mRNA.        |
| scl013000.1   | 10-S  | 50.2622 | 1.66 | Csnk2a2       | NM_009974.2 | Mus musculus casein kinase II, alpha 2, polypeptide (Csnk2a2), mRNA.                                          |
| scl34795.4.1  | 9-S   | 50.1719 | 1.75 | Sap30         | NM_021788.1 | Mus musculus sin3 associated polypeptide (Sap30), mRNA.                                                       |
| scl20687.14.1 | 105-S | 50.1445 | 1.49 | Slc43a3       | NM_021398.1 | Mus musculus solute carrier family 43, member 3 (Slc43a3), mRNA.                                              |
| scl54266.5    | 48-S  | 50.1158 | 1.68 | Rap2c         | NM_172413.1 | Mus musculus RAP2C, member of RAS oncogene family (Rap2c), mRNA.                                              |
| scl0067452.2  | 1-S   | 50.1099 | 1.6  | 1200006O19Rik | NM_026164.1 | Mus musculus RIKEN cDNA 1200006O19 gene (1200006O19Rik), mRNA.                                                |
| scl019326.1   | 315-S | 49.7696 | 1.44 | Rab11b        | NM_008997.1 | Mus musculus RAB11B, member RAS oncogene family (Rab11b), mRNA.                                               |
| scl49386.9    | 715-S | 49.6218 | 1.68 | Ppm1f         | NM_176833.2 | Mus musculus protein phosphatase 1F (PP2C domain containing) (Ppm1f), mRNA.                                   |
| scl31560.6.38 | 45-S  | 49.5635 | 1.95 | 1110006G06Rik | NM_028661.1 | Mus musculus RIKEN cDNA 1110006G06 gene (1110006G06Rik), mRNA.                                                |
| scl0027407.2  | 308-S | 49.2508 | 1.51 | Abcf2         | NM_013853.1 | Mus musculus ATP-binding cassette, sub-family F (GCN20), member 2 (Abcf2), mRNA.                              |
| scl39908.21.1 | 34-S  | 49.2438 | 2.76 | Cpd           | NM_007754.1 | Mus musculus carboxypeptidase D (Cpd), mRNA.                                                                  |
| scl0208715.1  | 140-S | 49.0902 | 1.71 | Hmgcs1        | NM_145942.2 | Mus musculus 3-hydroxy-3-methylglutaryl-Coenzyme A synthase 1 (Hmgcs1), mRNA.                                 |
| scl066144.2   | 329-S | 48.9166 | 1.54 | Atp6v1f       | NM_025381   | Mus musculus ATPase, H+ transporting, V1 subunit F (Atp6v1f), mRNA.                                           |
| scl54450.17.1 | 6-S   | 48.8252 | 1.55 | Dxlmx40e      | NM_138603.2 | Mus musculus DNA segment, Chr X, Immunex 40, expressed (DXlmx40e), mRNA.                                      |
| scl073373.8   | 41-S  | 48.7895 | 1.75 | 1700048E23Rik | NM_028521.1 | Mus musculus RIKEN cDNA 1700048E23 gene (1700048E23Rik), mRNA.                                                |
| scl084652.1   | 47-S  | 48.5618 | 1.5  | Drctnb1a      | NM_053090   | Mus musculus down-regulated by Cttnb1, a (Drctnb1a), mRNA.                                                    |
| scl25992.16.1 | 1-S   | 48.3853 | 2.03 | Asl           | NM_133768.1 | Mus musculus argininosuccinate lyase (Asl), mRNA.                                                             |
| scl24620.16   | 177-S | 48.1916 | 1.46 | BC004012      | NM_138671   | Mus musculus cDNA sequence BC004012 (BC004012), mRNA.                                                         |
| scl23294.9    | 553-S | 48.1236 | 1.55 | Zfp639        | NM_144519   |                                                                                                               |
| scl068045.1   | 243-S | 48.107  | 1.42 | 2700060E02Rik | NM_026528.1 | Mus musculus RIKEN cDNA 2700060E02 gene (2700060E02Rik), mRNA.                                                |
| scl0075221.1  | 274-S | 47.8128 | 1.51 | Dpp3          | NM_133803.1 | Mus musculus dipeptidylpeptidase 3 (Dpp3), mRNA.                                                              |
| scl0072278.1  | 319-S | 47.4115 | 2.17 | D9Erd392e     | NM_028181.1 |                                                                                                               |
| scl23927.19.1 | 34-S  | 47.1329 | 1.79 | Ipo13         | NM_146152.2 | Mus musculus importin 13 (Ipo13), mRNA.                                                                       |
| scl50689.6    | 424-S | 47.0917 | 1.51 | Slc35b1       | XM_128634.4 | Mus musculus solute carrier family 35, member B1 (Slc35b1), mRNA.                                             |
| scl00232227.2 | 246-S | 47.0911 | 2.01 | D6Erd349e     | NM_182784.1 | Mus musculus DNA segment, Chr 6, ERATO Doi 349, expressed (D6Erd349e), mRNA.                                  |
| scl43315.9.1  | 17-S  | 47.0673 | 2.05 | Sh3yl1        | NM_013709.2 | Mus musculus Sh3 domain YSC-like 1 (Sh3yl1), mRNA.                                                            |
| scl0214932.1  | 204-S | 46.9417 | 2.04 | Cecr5         | NM_144815.1 | Mus musculus cat eye syndrome chromosome region, candidate 5 homolog (human) (Cecr5), mRNA.                   |
| scl23219.3    | 221-S | 46.8453 | 2.13 | Rab33b        | NM_016858.1 | Mus musculus RAB33B, member of RAS oncogene family (Rab33b), mRNA.                                            |
| scl51768.11.1 | 9-S   | 46.4704 | 1.67 | Acaa2         | NM_177470.2 | Mus musculus acetyl-Coenzyme A acyltransferase 2 (mitochondrial 3-oxoacyl-Coenzyme A thiolase) (Acaa2), mRNA. |
| scl31412.26.1 | 74-S  | 46.3126 | 1.56 | Pold1         | NM_011131.2 | Mus musculus polymerase (DNA directed), delta 1, catalytic subunit (Pold1), mRNA.                             |
| scl0217342.1  | 24-S  | 46.2425 | 1.41 | B230113M03Rik | XM_109923.4 | Mus musculus RIKEN cDNA B230113M03 gene (B230113M03Rik), mRNA.                                                |
| scl066390.1   | 295-S | 46.1769 | 1.57 | 2310042G06Rik | NM_025531.2 | Mus musculus RIKEN cDNA 2310042G06 gene (2310042G06Rik), mRNA.                                                |
| scl55061.19.1 | 283-S | 46.0423 | 1.42 | Slc38a5       | NM_172479.1 |                                                                                                               |
| scl40538.6.1  | 45-S  | 46.0195 | 1.51 | H2afv         | XM_126043.3 |                                                                                                               |
| scl33848.6    | 136-S | 45.8163 | 1.63 | 4933411K20Rik | NM_025747.2 | Mus musculus RIKEN cDNA 4933411K20 gene (4933411K20Rik), mRNA.                                                |
| scl0328526.4  | 134-S | 45.7135 | 1.63 | LOC328526     | XM_283274.2 |                                                                                                               |
| scl27603.2.1  | 3-S   | 45.637  | 2.07 | Cxcl7         | NM_023785.1 | Mus musculus chemokine (C-X-C motif) ligand 7 (Cxcl7), mRNA.                                                  |
| scl0075613.2  | 301-S | 45.2768 | 1.89 | 2610034E13Rik | NM_029365.1 | Mus musculus RIKEN cDNA 2610034E13 gene (2610034E13Rik), mRNA.                                                |
| scl0072691.1  | 193-S | 45.2508 | 1.78 | 2810048G17Rik | NM_133746.2 | Mus musculus RIKEN cDNA 2810048G17 gene (2810048G17Rik), mRNA.                                                |
| scl020239.25  | 113-S | 45.2403 | 1.52 | Sca2          | NM_009125.1 | Mus musculus spinocerebellar ataxia 2 homolog (human) (Sca2), mRNA.                                           |
| scl014897.1   | 29-S  | 45.1738 | 1.45 | Trip12        | NM_133975.2 |                                                                                                               |
| scl019298.8   | 30-S  | 45.1432 | 1.6  | Pex19         | NM_023041.2 | Mus musculus peroxisome biogenesis factor 19 (Pex19), mRNA.                                                   |

|               |        |         |      |               |             |                                                                                                                                 |
|---------------|--------|---------|------|---------------|-------------|---------------------------------------------------------------------------------------------------------------------------------|
| sci066725.8   | 229-S  | 45.1216 | 1.84 | 4921513O20Rik | NM_025730.1 | Mus musculus RIKEN cDNA 4921513O20 gene (4921513O20Rik), mRNA.                                                                  |
| sci47705.17   | 95-S   | 45.1192 | 2    | L3mbtl2       | NM_145993.2 | Mus musculus l(3)mbt-like 2 (Drosophila) (L3mbtl2), mRNA.                                                                       |
| sci35771.8.1  | 41-S   | 45.1119 | 1.71 | 2410076I21Rik | XM_134948.2 | Mus musculus RIKEN cDNA 2410076I21 gene (2410076I21Rik), mRNA.                                                                  |
| sci40273.5    | 591-S  | 44.9963 | 1.63 | Maml1         | NM_175334.2 | Mus musculus mastermind like 1 (Drosophila) (Maml1), mRNA.                                                                      |
| sci34002.14.1 | 30-S   | 44.9938 | 1.65 | 2210415M20Rik | NM_027338.1 | Mus musculus RIKEN cDNA 2210415M20 gene (2210415M20Rik), mRNA.                                                                  |
| sci16186.5.1  | 30-S   | 44.9122 | 2.67 | Rgs18         | NM_022881.2 | Mus musculus regulator of G-protein signaling 18 (Rgs18), mRNA.                                                                 |
| sci067248.2   | 33-S   | 44.8342 | 1.78 | Rpl39         | NM_026055.1 | Mus musculus ribosomal protein L39 (Rpl39), mRNA.                                                                               |
| sci019935.5   | 129-S  | 44.8227 | 1.47 | Mrpl23        | NM_011288.1 | Mus musculus mitochondrial ribosomal protein L23 (Mrpl23), mRNA.                                                                |
| sci25676.27   | 663-S  | 44.7478 | 2.12 | 1110037F02Rik | XM_283937.2 | Mus musculus RIKEN cDNA 1110037F02 gene (1110037F02Rik), mRNA.                                                                  |
| sci0107094.1  | 210-S  | 44.7356 | 1.63 | AA408556      | NM_199447.2 | Mus musculus expressed sequence AA408556 (AA408556), mRNA.                                                                      |
| sci00224938.2 | 37-S   | 44.7312 | 1.5  | Pja2          | NM_144859.1 | Mus musculus praja 2, RING-H2 motif containing (Pja2), mRNA.                                                                    |
| sci066656.2   | 23-S   | 44.7012 | 1.4  | Eef1d         | NM_023240.1 | Mus musculus eukaryotic translation elongation factor 1 delta (guanine nucleotide exchange protein) (Eef1d), mRNA.              |
| sci26992.46   | 0-S    | 44.6946 | 1.73 | Al481500      | NM_133901.1 | Mus musculus expressed sequence Al481500 (Al481500), mRNA.                                                                      |
| sci46000.3    | 481-S  | 44.526  | 2.6  | Ndfip2        | NM_029561.1 | Mus musculus Nedd4 family interacting protein 2 (Ndfip2), mRNA.                                                                 |
| sci020926.1   | 330-S  | 44.5066 | 1.57 | Supt6h        | NM_009297.1 | Mus musculus suppressor of Ty 6 homolog (S. cerevisiae) (Supt6h), mRNA.                                                         |
| sci0068977.2  | 330-S  | 44.4767 | 1.9  | Haghl         | NM_026897.1 | Mus musculus hydroxyacylglutathione hydrolase-like (Haghl), mRNA.                                                               |
| sci00108755.1 | 37-S   | 44.4195 | 1.94 | 2610208E05Rik | NM_175364.2 | Mus musculus RIKEN cDNA 2610208E05 gene (2610208E05Rik), mRNA.                                                                  |
| sci0108888.1  | 320-S  | 44.3299 | 1.56 | Atad3a        | NM_179203.1 | Mus musculus ATPase family, AAA domain containing 3A (Atad3a), mRNA.                                                            |
| sci0076740.1  | 108-S  | 44.288  | 1.59 | C920006C10Rik | NM_133766.1 | Mus musculus RIKEN cDNA C920006C10 gene (C920006C10Rik), mRNA.                                                                  |
| sci067671.4   | 8-S    | 44.1665 | 1.43 | Rpl38         | NM_023372.1 | Mus musculus ribosomal protein L38 (Rpl38), mRNA.                                                                               |
| sci0012045.1  | 114-S  | 44.1583 | 1.41 | Bcl2a1b       | NM_007534   | Mus musculus B-cell leukemia/lymphoma 2 related protein A1b (Bcl2a1b), mRNA.                                                    |
| sci052504.1   | 184-S  | 44.0643 | 1.62 | 2810429O05Rik | NM_134046.3 | Mus musculus RIKEN cDNA 2810429O05 gene (2810429O05Rik), mRNA.                                                                  |
| sci40072.13   | 201-S  | 44.0264 | 1.63 | Map2k4        | NM_009157   | Mus musculus mitogen activated protein kinase kinase 4 (Map2k4), mRNA.                                                          |
| sci53489.23   | 479-S  | 43.8825 | 1.56 | Pacs1         | XM_283545.1 | Mus musculus phosphofurin acidic cluster sorting protein 1 (Pacs1), mRNA.                                                       |
| sci0030791.1  | 194-S  | 43.8781 | 1.55 | Slc39a1       | NM_013901   | Mus musculus solute carrier family 39 (zinc transporter), member 1 (Slc39a1), mRNA.                                             |
| sci074479.1   | 19-S   | 43.6519 | 1.47 | Snx11         | NM_028965.2 | Mus musculus sorting nexin 11 (Snx11), mRNA.                                                                                    |
| sci15987.1.1  | 285-S  | 43.6214 | 1.43 | Al481316      | XM_148986.1 | Mus musculus expressed sequence Al481316 (Al481316), mRNA.                                                                      |
| sci1965.9     | 618-S  | 43.5505 | 1.5  | C430003P19Rik | NM_198017.1 | Mus musculus RIKEN cDNA C430003P19 gene (C430003P19Rik), mRNA.                                                                  |
| sci017776.1   | 270-S  | 43.4504 | 1.46 | Mast2         | NM_008641.1 | Mus musculus microtubule associated serine/threonine kinase 2 (Mast2), mRNA.                                                    |
| sci0019246.2  | 230-S  | 43.4474 | 1.45 | Ptpn1         | NM_011201.1 | Mus musculus protein tyrosine phosphatase, non-receptor type 1 (Ptpn1), mRNA.                                                   |
| sci23523.7.1  | 20-S   | 43.4355 | 1.63 | Fbxo6b        | NM_015797.1 | Mus musculus F-box only protein 6b (Fbxo6b), mRNA.                                                                              |
| sci29846.4    | 459-S  | 43.3235 | 1.43 | Gcs1          | NM_020619.2 | Mus musculus glucosidase 1 (Gcs1), mRNA.                                                                                        |
| sci27262.6    | 658-S  | 43.2536 | 1.78 | 9130017A15Rik | NM_177242.3 | Mus musculus RIKEN cDNA 9130017A15 gene (9130017A15Rik), mRNA.                                                                  |
| sci0269582.3  | 30-S   | 43.1821 | 2.1  | Clspn         | NM_175554.3 |                                                                                                                                 |
| sci066878.10  | 113-S  | 43.0551 | 1.42 | RioK3         | NM_024182.2 | Mus musculus RIO kinase 3 (yeast) (RioK3), mRNA.                                                                                |
| sci0003758.1  | 1237-S | 42.977  | 1.95 | Ubqln1        | NM_026842.3 | Mus musculus ubiquilin 1 (Ubqln1), transcript variant 1, mRNA.                                                                  |
| sci017110.1   | 293-S  | 42.8407 | 2.08 | Lzp-s         | NM_013590.2 | Mus musculus P lysozyme structural (Lzp-s), mRNA.                                                                               |
| sci017993.1   | 123-S  | 42.8134 | 1.59 | Ndufs4        | NM_010987.1 | Mus musculus NADH dehydrogenase (ubiquinone) Fe-S protein 4 (Ndufs4), mRNA.                                                     |
| sci37776.6    | 58-S   | 42.6856 | 1.59 | D10Jhu81e     | NM_138601.1 | Mus musculus DNA segment, Chr 10, Johns Hopkins University 81 expressed (D10Jhu81e), mRNA.                                      |
| sci29521.11   | 18-S   | 42.6211 | 1.48 | Grc3f         | NM_145130.1 | Mus musculus gene rich cluster, C3f gene (Grc3f), mRNA.                                                                         |
| sci0209011.1  | 312-S  | 42.5946 | 1.61 | Sirt7         | NM_153056.1 | Mus musculus sirtuin 7 (silent mating type information regulation 2, homolog 7) (S. cerevisiae) (Sirt7), mRNA.                  |
| sci37695.8.1  | 48-S   | 42.5262 | 2.5  | Nfic          | NM_008688.2 | Mus musculus nuclear factor I/C (Nfic), mRNA.                                                                                   |
| sci068276.1   | 0-S    | 42.2438 | 1.6  | 4930584N22Rik | NM_026654.1 | Mus musculus RIKEN cDNA 4930584N22 gene (4930584N22Rik), mRNA.                                                                  |
| sci0029875.2  | 286-S  | 42.143  | 2.25 | Iqgap1        | NM_016721.1 | Mus musculus IQ motif containing GTPase activating protein 1 (Iqgap1), mRNA.                                                    |
| sci0051788.1  | 274-S  | 42.1322 | 1.39 | H2afz         | NM_016750.1 | Mus musculus H2A histone family, member Z (H2afz), mRNA.                                                                        |
| sci23442.8    | 471-S  | 42.015  | 1.67 | 1110060F11Rik | NM_026395.1 | Mus musculus RIKEN cDNA 1110060F11 gene (1110060F11Rik), mRNA.                                                                  |
| sci0017274.1  | 278-S  | 41.9903 | 2.2  | Rab8a         | NM_023126.2 | Mus musculus RAB8A, member RAS oncogene family (Rab8a), mRNA.                                                                   |
| sci015204.23  | 217-S  | 41.8233 | 1.85 | Herc2         | NM_010418.1 | Mus musculus hect (homologous to the E6-AP (UBE3A) carboxyl terminus) domain and RCC1 (CHC1)-like domain (RLD) 2 (Herc2), mRNA. |
| sci067246.4   | 216-S  | 41.8204 | 1.48 | 2810474O19Rik | XM_132966.3 | Mus musculus RIKEN cDNA 2810474O19 gene (2810474O19Rik), mRNA.                                                                  |
| sci0003527.1  | 242-S  | 41.8029 | 1.87 | Ddx6          | NM_007841.2 | Mus musculus DEAD (Asp-Glu-Ala-Asp) box polypeptide 6 (Ddx6), mRNA.                                                             |
| sci012367.6   | 5-S    | 41.6904 | 1.61 | Casp3         | NM_009810.1 | Mus musculus caspase 3, apoptosis related cysteine protease (Casp3), mRNA.                                                      |
| sci54141.46.3 | 34-S   | 41.6218 | 1.45 | Flna          | XM_289920.2 | Mus musculus filamin, alpha (Flna), mRNA.                                                                                       |
| sci071175.1   | 21-S   | 41.4942 | 2.09 | 4933421G18Rik | XM_127929.3 | Mus musculus RIKEN cDNA 4933421G18 gene (4933421G18Rik), mRNA.                                                                  |
| sci0002625.1  | 41-S   | 41.4505 | 3.48 | 2210012G02Rik | NM_025617.1 | Mus musculus RIKEN cDNA 2210012G02 gene (2210012G02Rik), mRNA.                                                                  |
| sci011949.3   | 3-S    | 41.4339 | 1.42 | Atp5c1        | NM_020615.2 | Mus musculus ATP synthase, H+ transporting, mitochondrial F1 complex, gamma polypeptide 1 (Atp5c1), mRNA.                       |
| sci32850.30.1 | 3-S    | 41.3371 | 1.73 | Map4k1        | NM_008279.1 | Mus musculus mitogen activated protein kinase kinase kinase 1 (Map4k1), mRNA.                                                   |



|                     |         |      |               |             |                                                                                                  |
|---------------------|---------|------|---------------|-------------|--------------------------------------------------------------------------------------------------|
| scI0218100.1 36-S   | 41.3153 | 1.65 | Zfp322a       | NM 172586.2 | Mus musculus zinc finger protein 322a (Zfp322a), mRNA.                                           |
| scI52445.7 23-S     | 41.2803 | 1.83 | Scd1          | NM 009127.2 | Mus musculus stearyl-Coenzyme A desaturase 1 (Scd1), mRNA.                                       |
| scI36067.18 4-S     | 41.1393 | 1.59 | Aplp2         | NM 009691.1 | Mus musculus amyloid beta (A4) precursor-like protein 2 (Aplp2), mRNA.                           |
| scI0237422.9 211-S  | 41.0837 | 2    | BC051080      | NM 183172.1 |                                                                                                  |
| scI0027223.1 124-S  | 41.0773 | 1.81 | Trp53bp1      | NM 013735.2 | Mus musculus transformation related protein 53 binding protein 1 (Trp53bp1), mRNA.               |
| scI00102791.2 289-S | 41.0401 | 1.78 | Tcta          | NM 133986.1 |                                                                                                  |
| scI0020747.2 286-S  | 40.9982 | 1.48 | Spop          | NM 025287.1 | Mus musculus speckle-type POZ protein (Spop), mRNA.                                              |
| scI34388.19 15-S    | 40.9008 | 1.4  | Ranbp10       | NM 145824.3 |                                                                                                  |
| scI0011308.2 118-S  | 40.8194 | 1.4  | Abi1          | NM 007380.1 | Mus musculus abl-interactor 1 (Abi1), mRNA.                                                      |
| scI00319157.1 0-S   | 40.6269 | 2.62 | Hist1h4f      | NM 175655.1 | Mus musculus histone 1, H4f (Hist1h4f), mRNA.                                                    |
| scI31534.6.1 6-S    | 40.561  | 1.71 | Ckap1         | NM 025548.1 | Mus musculus cytoskeleton-associated protein 1 (Ckap1), mRNA.                                    |
| scI50694.13.20 68-S | 40.466  | 1.61 | Supt3h        | NM 178652.1 | Mus musculus suppressor of Ty 3 homolog (S. cerevisiae) (Supt3h), mRNA.                          |
| scI22059.9 173-S    | 40.125  | 1.69 | Pdcd10        | NM 019745.2 | Mus musculus programmed cell death 10 (Pdcd10), mRNA.                                            |
| scI25784.5.1 54-S   | 40.1024 | 1.77 | Pdap1         | XM 132501.2 | Mus musculus PDGFA associated protein 1 (Pdap1), mRNA.                                           |
| scI0017993.1 168-S  | 40.0281 | 1.51 | Ndufs4        | NM 010887.1 | Mus musculus NADH dehydrogenase (ubiquinone) Fe-S protein 4 (Ndufs4), mRNA.                      |
| scI0018230.2 224-S  | 40.007  | 1.82 | Nxn           | NM 008750.2 | Mus musculus nucleoredoxin (Nxn), mRNA.                                                          |
| scI00104570.2 297-S | 39.9736 | 1.89 | AW011752      | NM 134034.1 | Mus musculus expressed sequence AW011752 (AW011752), mRNA.                                       |
| scI46303.7 279-S    | 39.944  | 1.45 | Lrp10         | NM 022993.2 | Mus musculus low-density lipoprotein receptor-related protein 10 (Lrp10), mRNA.                  |
| scI41207.21.1 236-S | 39.8768 | 1.7  | Spag5         | NM 017407.1 | Mus musculus sperm associated antigen 5 (Spag5), mRNA.                                           |
| scI37112.9 269-S    | 39.8449 | 1.59 | Esam1         | NM 027102.1 | Mus musculus endothelial cell-specific adhesion molecule (Esam1), mRNA.                          |
| scI020317.1 68-S    | 39.7666 | 1.95 | Serpinf1      | NM 011340.2 | Mus musculus serine (or cysteine) proteinase inhibitor, clade F, member 1 (Serpinf1), mRNA.      |
| scI30730.6 511-S    | 39.7344 | 1.37 | Cdr2          | NM 007672.1 | Mus musculus cerebellar degeneration-related 2 (Cdr2), mRNA.                                     |
| scI00217430.2 0-S   | 39.7165 | 1.56 | E030024M05Rik | NM 172574.1 | Mus musculus RIKEN cDNA E030024M05 gene (E030024M05Rik), mRNA.                                   |
| scI028035.1 139-S   | 39.6105 | 1.48 | Usp39         | NM 138592.1 | Mus musculus ubiquitin specific protease 39 (Usp39), mRNA.                                       |
| scI54760.5 0-S      | 39.5312 | 2.26 | Efnb1         | NM 010110.2 | Mus musculus ephrin B1 (Efnb1), mRNA.                                                            |
| scI20502.5 452-S    | 39.5024 | 1.85 | Lin7c         | NM 011699   | Mus musculus lin 7 homolog c (C. elegans) (Lin7c), mRNA.                                         |
| scI23055.15.1 74-S  | 39.4893 | 1.4  | Pirg1         | NM 016784.2 | Mus musculus pleiotropic regulator 1, PRL1 homolog (Arabidopsis) (Pirg1), mRNA.                  |
| scI30807.22.1 70-S  | 39.3027 | 1.9  | Mrv1          | NM 194464.1 | Mus musculus MRV integration site 1 (Mrv1), transcript variant 1, mRNA.                          |
| scI0002511.1 1272-S | 39.2211 | 1.37 | Myh9          | NM 022410.1 | Mus musculus myosin heavy chain IX (Myh9), mRNA.                                                 |
| scI48225.31 410-S   | 39.018  | 1.7  | Tiam1         | NM 009384.1 | Mus musculus T-cell lymphoma invasion and metastasis 1 (Tiam1), mRNA.                            |
| scI27010.17 214-S   | 38.9831 | 1.5  | Pscd3         | NM 011182.2 | Mus musculus pleckstrin homology, Sec7 and coiled-coil domains 3 (Pscd3), mRNA.                  |
| scI022289.28 11-S   | 38.7206 | 1.68 | Utx           | NM 009483.1 | Mus musculus ubiquitously transcribed tetratricopeptide repeat gene, X chromosome (Utx), mRNA.   |
| scI017974.6 299-S   | 38.6845 | 1.8  | Nck2          | NM 010879.2 | Mus musculus non-catalytic region of tyrosine kinase adaptor protein 2 (Nck2), mRNA.             |
| scI0319191.1 321-S  | 38.6669 | 1.58 | Hist1h2ai     | NM 178182   | Mus musculus histone 1, H2ai (Hist1h2ai), mRNA.                                                  |
| scI069583.1 127-S   | 38.6333 | 1.67 | Tnfsf13       | NM 023517.1 | Mus musculus tumor necrosis factor (ligand) superfamily, member 13 (Tnfsf13), mRNA.              |
| scI0237898.1 282-S  | 38.6203 | 1.57 | 6430526O11Rik | XM 110937.4 |                                                                                                  |
| scI32043.3 256-S    | 38.5879 | 1.5  | A1467606      | NM 178901.2 | Mus musculus expressed sequence A1467606 (A1467606), mRNA.                                       |
| scI027556.1 96-S    | 38.5816 | 1.37 | Clic4         | XM 124389.1 | Mus musculus chloride intracellular channel 4 (mitochondrial) (Clic4), mRNA.                     |
| scI0003137.1 53-S   | 38.5421 | 1.46 | Drbp1         | NM 178090.2 | Mus musculus developmentally regulated RNA binding protein 1 (Drbp1), mRNA.                      |
| scI0029809.2 171-S  | 38.4985 | 1.68 | Rabgap11      | NM 013862.3 |                                                                                                  |
| scI00234684.2 208-S | 38.2479 | 3.72 | Lrrc29        | NM 177449.2 |                                                                                                  |
| scI0011983.1 209-S  | 38.138  | 1.47 | Atpf1         | NM 007512.2 |                                                                                                  |
| scI019166.8 87-S    | 38.0017 | 1.36 | Psm2          | NM 008944.1 | Mus musculus proteasome (prosome, macropain) subunit, alpha type 2 (Psm2), mRNA.                 |
| scI28755.11.1 30-S  | 37.9235 | 1.8  | Dusp11        | NM 028099.2 | Mus musculus dual specificity phosphatase 11 (RNA/RNP complex 1-interacting) (Dusp11), mRNA.     |
| scI40317.1.1637 8-S | 37.8869 | 4.1  | 4930527B16Rik | XM 147531.1 | Mus musculus RIKEN cDNA 4930527B16 gene (4930527B16Rik), mRNA.                                   |
| scI0026554.2 150-S  | 37.8481 | 1.44 | Cul3          | NM 016716.2 | Mus musculus cullin 3 (Cul3), mRNA.                                                              |
| scI012385.18 225-S  | 37.8214 | 1.38 | Catn1         | NM 009818.1 | Mus musculus catenin alpha 1 (Catn1), mRNA.                                                      |
| scI020170.2 257-S   | 37.6894 | 1.84 | Hps6          | NM 176785.1 | Mus musculus Hermansky-Pudlak syndrome 6 (Hps6), mRNA.                                           |
| scI0066884.2 148-S  | 37.5258 | 1.46 | Appbp2        | NM 025825.2 | Mus musculus amyloid beta precursor protein (cytoplasmic tail) binding protein 2 (Appbp2), mRNA. |
| scI21638.11 586-S   | 37.4305 | 1.9  | B430201A12Rik | XM 283903.2 |                                                                                                  |
| scI40985.2.1 86-S   | 37.4062 | 3.11 | Hoxb4         | NM 010459   | Mus musculus homeo box B4 (Hoxb4), mRNA.                                                         |
| scI0002699.1 4-S    | 37.3796 | 1.71 | No16          | NM 139237.1 | Mus musculus nucleolar protein family 6 (RNA-associated) (No16), transcript variant alpha, mRNA. |
| scI0002899.1 69-S   | 37.3175 | 1.55 | Utx           | NM 009483.1 | Mus musculus ubiquitously transcribed tetratricopeptide repeat gene, X chromosome (Utx), mRNA.   |
| scI21336.8 145-S    | 37.2158 | 1.44 | 3110001A13Rik | NM 025626.3 | Mus musculus RIKEN cDNA 3110001A13 gene (3110001A13Rik), mRNA.                                   |
| scI37393.11 210-S   | 37.1961 | 1.43 | Pip5k2c       | NM 054097.2 | Mus musculus phosphatidylinositol-4-phosphate 5-kinase, type II, gamma (Pip5k2c), mRNA.          |
| scI0237943.1 29-S   | 37.1517 | 1.77 | 5430405G24Rik | XM 152907.3 | Mus musculus RIKEN cDNA 5430405G24 gene (5430405G24Rik), mRNA.                                   |

|                |       |         |      |               |             |                                                                                                                |
|----------------|-------|---------|------|---------------|-------------|----------------------------------------------------------------------------------------------------------------|
| sci0021871.2   | 111-S | 36.9407 | 1.54 | Atp6v0a2      | NM_011596.1 | Mus musculus ATPase, H+ transporting, lysosomal V0 subunit a isoform 2 (Atp6v0a2), mRNA.                       |
| sci47044.6.24  | 75-S  | 36.9376 | 1.47 | 0610041B22Rik | NM_025340.1 | Mus musculus RIKEN cDNA 0610041B22 gene (0610041B22Rik), mRNA.                                                 |
| sci0022195.1   | 278-S | 36.8843 | 1.44 | Ube2l3        | XM_148568.1 | Mus musculus ubiquitin-conjugating enzyme E2L 3 (Ube2l3), mRNA.                                                |
| sci53403.26.13 | 76-S  | 36.8715 | 1.74 | Bscl2         | NM_008144.3 | Mus musculus Bernardinelli-Seip congenital lipodystrophy 2 homolog (human) (Bscl2), mRNA.                      |
| sci00231841.2  | 319-S | 36.7454 | 1.58 | AA881470      | NM_181066.1 | Mus musculus EST AA881470 (AA881470), mRNA.                                                                    |
| sci32464.22.1  | 107-S | 36.6552 | 1.68 | Pde8a         | NM_008803.1 | Mus musculus phosphodiesterase 8A (Pde8a), mRNA.                                                               |
| sci29492.60.1  | 120-S | 36.6185 | 2.31 | Vwf           | NM_011708.2 | Mus musculus Von Willebrand factor homolog (Vwf), mRNA.                                                        |
| sci23528.23    | 0-S   | 36.5752 | 1.42 | Mfn2          | NM_133201.1 | Mus musculus mitofusin 2 (Mfn2), mRNA.                                                                         |
| sci41519.8     | 316-S | 36.5072 | 1.48 | BC003251      | NM_024480.2 | Mus musculus cDNA sequence BC003251 (BC003251), mRNA.                                                          |
| sci34568.25    | 184-S | 36.3823 | 2.17 | BC016188      | NM_145970.1 | Mus musculus cDNA sequence BC016188 (BC016188), mRNA.                                                          |
| sci27950.14.1  | 172-S | 36.3612 | 1.51 | Slc4a1ap      | NM_009206.1 | Mus musculus solute carrier family 4 (anion exchanger), member 1, adaptor protein (Slc4a1ap), mRNA.            |
| sci067160.10   | 33-S  | 36.3587 | 1.46 | Eef1g         | NM_026007   | Mus musculus eukaryotic translation elongation factor 1 gamma (Eef1g), mRNA.                                   |
| sci35462.25    | 609-S | 36.339  | 1.55 | Pik3cb        | NM_029094.1 | Mus musculus phosphatidylinositol 3-kinase, catalytic, beta polypeptide (Pik3cb), mRNA.                        |
| sci0320365.12  | 9-S   | 36.242  | 1.93 | 9330186A19Rik | NM_178781.2 | Mus musculus RIKEN cDNA 9330186A19 gene (9330186A19Rik), mRNA.                                                 |
| sci00170459.2  | 123-S | 36.2337 | 1.67 | Stard4        | NM_133774.2 | Mus musculus STAR-related lipid transfer (START) domain containing 4 (Stard4), mRNA.                           |
| sci065111.1    | 137-S | 36.2292 | 1.38 | Dap3          | NM_022994.2 | Mus musculus death associated protein 3 (Dap3), mRNA.                                                          |
| sci0021453.2   | 208-S | 36.0955 | 1.76 | Tcof1         | NM_011552.1 | Mus musculus Treacher Collins Franceschetti syndrome 1, homolog (Tcof1), mRNA.                                 |
| sci071435.1    | 313-S | 36.0872 | 1.64 | Arhgap21      | XM_130033.5 |                                                                                                                |
| sci20092.24    | 625-S | 35.9915 | 2.14 | Dnmt3b        | NM_010068.1 | Mus musculus DNA methyltransferase 3B (Dnmt3b), mRNA.                                                          |
| sci26742.12.1  | 68-S  | 35.9736 | 1.44 | Eif2b4        | NM_010122.1 | Mus musculus eukaryotic translation initiation factor 2B, subunit 4 (Eif2b4), mRNA.                            |
| sci49001.3     | 229-S | 35.8798 | 1.36 | Cggbp1        | NM_178647.2 | Mus musculus CGG triplet repeat binding protein 1 (Cggbp1), mRNA.                                              |
| sci0380773.4   | 2-S   | 35.8566 | 1.43 | 1810035L17Rik | XM_354684.1 |                                                                                                                |
| sci022327.6    | 246-S | 35.8128 | 1.43 | Vbp1          | NM_011692.1 | Mus musculus von Hippel-Lindau binding protein 1 (Vbp1), mRNA.                                                 |
| sci17781.7.1   | 157-S | 35.6325 | 1.88 | D1ErtD161e    | NM_026187.3 | Mus musculus DNA segment, Chr 1, ERATO Doi 161, expressed (D1ErtD161e), mRNA.                                  |
| sci072462.6    | 25-S  | 35.629  | 1.89 | 2600005C20Rik | NM_028244.1 | Mus musculus RIKEN cDNA 2600005C20 gene (2600005C20Rik), mRNA.                                                 |
| sci17443.8     | 550-S | 35.6235 | 1.48 | Arl10b        | NM_026823.1 |                                                                                                                |
| sci32698.6.1   | 30-S  | 35.6098 | 1.54 | Irf3          | NM_016849.2 | Mus musculus interferon regulatory factor 3 (Irf3), mRNA.                                                      |
| sci53380.11    | 494-S | 35.5973 | 1.39 | Fads1         | NM_146094.1 | Mus musculus fatty acid desaturase 1 (Fads1), mRNA.                                                            |
| sci34564.9     | 192-S | 35.5919 | 2.26 | 4930527D15Rik | NM_026350.1 | Mus musculus RIKEN cDNA 4930527D15 gene (4930527D15Rik), mRNA.                                                 |
| sci0110253.14  | 323-S | 35.4333 | 1.62 | Triobp        | NM_138579.2 | Mus musculus TRIO and F-actin binding protein (Triobp), mRNA.                                                  |
| sci27959.12    | 30-S  | 35.3917 | 1.67 | Snx17         | NM_153680.1 | Mus musculus sorting nexin 17 (Snx17), mRNA.                                                                   |
| sci059287.1    | 209-S | 35.384  | 1.46 | Ncstn         | NM_021607.2 | Mus musculus nicastrin (Ncstn), mRNA.                                                                          |
| sci00217692.2  | 267-S | 35.348  | 1.93 | Sipa11i       | NM_172579.1 | Mus musculus signal-induced proliferation-associated 1 like 1 (Sipa11i), mRNA.                                 |
| sci17218.7.1   | 11-S  | 35.2882 | 2.49 | Slamf1        | NM_013730.2 | Mus musculus signaling lymphocytic activation molecule family member 1 (Slamf1), mRNA.                         |
| sci50907.6     | 346-S | 35.2475 | 2.4  | Sfrs3         | NM_013663.3 | Mus musculus splicing factor, arginine/serine-rich 3 (SRp20) (Sfrs3), mRNA.                                    |
| sci37022.6.1   | 3-S   | 35.0882 | 1.71 | Cd3d          | NM_013487.1 | Mus musculus CD3 antigen, delta polypeptide (Cd3d), mRNA.                                                      |
| sci0002648.1   | 0-S   | 35.0834 | 1.59 | Mill3         | NM_027326.2 | Mus musculus myeloid/lymphoid or mixed lineage-leukemia translocation to 3 homolog (Drosophila) (Mill3), mRNA. |
| sci027883.1    | 63-S  | 35.0671 | 1.84 | D16H22S680E   | XM_147173.1 | Mus musculus DNA segment, Chr 16, human D22S680E, expressed (D16H22S680E), mRNA.                               |
| sci072722.1    | 216-S | 35.0625 | 1.44 | 2810405J04Rik | NM_133747.1 | Mus musculus RIKEN cDNA 2810405J04 gene (2810405J04Rik), mRNA.                                                 |
| sci52858.1.11  | 122-S | 34.9618 | 1.73 | Znhit2        | NM_013859.1 |                                                                                                                |
| sci53012.17    | 160-S | 34.9524 | 1.63 | A1450540      | NM_145505.2 | Mus musculus expressed sequence A1450540 (A1450540), mRNA.                                                     |
| sci000567.1    | 25-S  | 34.943  | 1.46 | Clcn3         | NM_007711.1 | Mus musculus chloride channel 3 (Clcn3), transcript variant a, mRNA.                                           |
| sci068114.7    | 83-S  | 34.9218 | 1.42 | Mum1          | NM_023431.3 |                                                                                                                |
| sci41579.7     | 169-S | 34.864  | 1.41 | Ppp2ca        | NM_019411.2 | Mus musculus protein phosphatase 2a, catalytic subunit, alpha isoform (Ppp2ca), mRNA.                          |
| sci013244.1    | 23-S  | 34.7552 | 1.36 | Degs          | NM_007853.2 | Mus musculus degenerative spermatocyte homolog (Drosophila) (Degs), mRNA.                                      |
| sci37305.10.1  | 6-S   | 34.7092 | 11.5 | Mmp10         | NM_019471.1 | Mus musculus matrix metalloproteinase 10 (Mmp10), mRNA.                                                        |
| sci27956.4.5   | 26-S  | 34.6919 | 2.49 | Krtcap3       | NM_027221.1 | Mus musculus keratinocyte associated protein 3 (Krtcap3), mRNA.                                                |
| sci25758.6.1   | 14-S  | 34.6703 | 1.85 | 1200006F02Rik | NM_027872.1 | Mus musculus RIKEN cDNA 1200006F02 gene (1200006F02Rik), mRNA.                                                 |
| sci22088.5.1   | 88-S  | 34.6446 | 2.07 | Lxn           | NM_016753.2 | Mus musculus latexin (Lxn), mRNA.                                                                              |
| sci0072313.2   | 218-S | 34.5173 | 1.39 | 2510002A14Rik | NM_028194.1 | Mus musculus RIKEN cDNA 2510002A14 gene (2510002A14Rik), mRNA.                                                 |
| sci0023821.2   | 49-S  | 34.4812 | 1.72 | Bace1         | NM_011792.3 | Mus musculus beta-site APP cleaving enzyme 1 (Bace1), mRNA.                                                    |
| sci39328.7     | 317-S | 34.4178 | 1.38 | Grb2          | NM_008163.2 | Mus musculus growth factor receptor bound protein 2 (Grb2), mRNA.                                              |
| sci30429.2.1   | 68-S  | 34.4056 | 2.22 | Gng11         | NM_025331.2 | Mus musculus guanine nucleotide binding protein (G protein), gamma 11 (Gng11), mRNA.                           |
| sci006980.2    | 160-S | 34.3123 | 1.55 | Gmppa         | NM_133708.1 | Mus musculus GDP-mannose pyrophosphorylase A (Gmppa), mRNA.                                                    |
| sci54952.8     | 631-S | 34.2076 | 1.58 | 1200013B08Rik | NM_028773.2 | Mus musculus RIKEN cDNA 1200013B08 gene (1200013B08Rik), mRNA.                                                 |
| sci0215449.1   | 111-S | 34.0702 | 1.38 | Rap1b         | NM_024457.1 | Mus musculus RAS related protein 1b (Rap1b), mRNA.                                                             |

|                       |         |      |               |             |                                                                                                           |
|-----------------------|---------|------|---------------|-------------|-----------------------------------------------------------------------------------------------------------|
| scl0170716.1 183-S    | 34.0682 | 2.2  | Cyp4f13       | NM 130882.1 | Mus musculus cytochrome P450, family 4, subfamily f, polypeptide 13 (Cyp4f13), mRNA.                      |
| scl25693.5.1 159-S    | 34.0357 | 3.33 | Chd7          | XM 149413.3 |                                                                                                           |
| scl49743.39.1 15-S    | 34.0239 | 1.4  | C3            | NM 009778.1 | Mus musculus complement component 3 (C3), mRNA.                                                           |
| scl0004095.1 33-S     | 33.9746 | 4.44 | Zcchc8        | NM 027494.1 | Mus musculus zinc finger, CCHC domain containing 8 (Zcchc8), mRNA.                                        |
| scl0002578.1 9-S      | 33.9544 | 1.34 | Eif3s6ip      | NM 145139.1 | Mus musculus eukaryotic translation initiation factor 3, subunit 6 interacting protein (Eif3s6ip), mRNA.  |
| scl43441.25.1 42-S    | 33.9522 | 1.87 | Dtnb          | NM 007886.1 | Mus musculus dystrobrevin, beta (Dtnb), mRNA.                                                             |
| scl0228545.7 132-S    | 33.9376 | 1.68 | Vps18         | NM 172269.2 |                                                                                                           |
| scl0057874.1 260-S    | 33.8098 | 1.35 | AW742319      | NM 021345.1 | Mus musculus expressed sequence AW742319 (AW742319), mRNA.                                                |
| scl00234797.2 307-S   | 33.7611 | 2.07 | 6430548M08Rik | NM 172286.2 | Mus musculus RIKEN cDNA 6430548M08 gene (6430548M08Rik), mRNA.                                            |
| scl39652.23.1463 24-S | 33.6425 | 1.36 | Kpnb1         | NM 008379.2 | Mus musculus karyopherin (importin) beta 1 (Kpnb1), mRNA.                                                 |
| scl48709.7 108-S      | 33.5513 | 1.37 | Ube2l3        | XM 148568.1 | Mus musculus ubiquitin-conjugating enzyme E2L 3 (Ube2l3), mRNA.                                           |
| scl0217893.6 312-S    | 33.5411 | 1.41 | 6720425G15Rik | NM 198165.1 | Mus musculus RIKEN cDNA 6720425G15 gene (6720425G15Rik), mRNA.                                            |
| scl46964.12 425-S     | 33.4695 | 1.4  | 4732495E13Rik | XM 128300.4 | Mus musculus RIKEN cDNA 4732495E13 gene (4732495E13Rik), mRNA.                                            |
| scl0072193.1 269-S    | 33.459  | 1.61 | Sfrs2ip       | XM 128178.5 |                                                                                                           |
| scl50686.4.1 41-S     | 33.423  | 1.62 | Mrp14         | NM 026732.2 |                                                                                                           |
| scl38701.12.1 200-S   | 33.412  | 1.84 | Arid3a        | NM 007880.1 | Mus musculus AT rich interactive domain 3A (Bright like) (Arid3a), mRNA.                                  |
| scl056292.1 247-S     | 33.4    | 1.37 | Ard1          | NM 019870.1 | Mus musculus N-acetyltransferase ARD1 homolog (S. cerevisiae) (Ard1), mRNA.                               |
| scl0004165.1 41-S     | 33.323  | 8.21 | Kihl5         | NM 175174.2 | Mus musculus kelch-like 5 (Drosophila) (Kihl5), mRNA.                                                     |
| scl17047.9.4 6-S      | 33.3014 | 1.93 | BC013667      | NM 172266.1 | Mus musculus cDNA sequence BC013667 (BC013667), mRNA.                                                     |
| scl00252972.1 246-S   | 33.2927 | 1.53 | Tpcn1         | NM 145853.2 | Mus musculus two pore channel 1 (Tpcn1), mRNA.                                                            |
| scl0003409.1 16-S     | 33.2884 | 1.59 | A330080J22Rik | NM 178667.2 | Mus musculus RIKEN cDNA A330080J22 gene (A330080J22Rik), mRNA.                                            |
| scl0067684.1 211-S    | 33.2744 | 1.35 | 3300001P08Rik | NM 026313.1 | Mus musculus RIKEN cDNA 3300001P08 gene (3300001P08Rik), mRNA.                                            |
| scl28480.7 231-S      | 33.274  | 1.43 | Adipor2       | NM 197985.2 |                                                                                                           |
| scl55078.9.1 18-S     | 33.2587 | 2.64 | Lmo6          | NM 175097.2 | Mus musculus LIM domain only 6 (Lmo6), mRNA.                                                              |
| scl32922.5.1 20-S     | 33.2557 | 1.71 | BC028440      | NM 172148.1 | Mus musculus cDNA sequence BC028440 (BC028440), mRNA.                                                     |
| scl22978.7.1 18-S     | 33.2457 | 2.08 | Krtcap2       | NM 025327.1 | Mus musculus keratinocyte associated protein 2 (Krtcap2), mRNA.                                           |
| scl00101502.1 299-S   | 33.114  | 1.72 | Hsd3b7        | NM 133943.1 | Mus musculus hydroxy-delta-5-steroid dehydrogenase, 3 beta- and steroid delta-isomerase 7 (Hsd3b7), mRNA. |
| scl0002028.1 25-S     | 33.1008 | 1.36 | 2310066N05Rik | NM 027371.1 | Mus musculus RIKEN cDNA 2310066N05 gene (2310066N05Rik), mRNA.                                            |
| scl0002675.1 35-S     | 33.0966 | 1.59 | Nasp          | NM 016777.2 | Mus musculus nuclear autoantigenic sperm protein (histone-binding) (Nasp), mRNA.                          |
| scl0002734.1 23-S     | 33.0713 | 1.69 | Ssbp3         | NM 198438.1 | Mus musculus single-stranded DNA binding protein 3 (Ssbp3), transcript variant 2, mRNA.                   |
| scl00229211.2 16-S    | 33.0213 | 2.6  | Acad9         | NM 172678.2 | Mus musculus acyl-Coenzyme A dehydrogenase family, member 9 (Acad9), mRNA.                                |
| scl19579.2 109-S      | 33.0203 | 1.45 | A830007P12Rik | NM 146115.2 | Mus musculus RIKEN cDNA A830007P12 gene (A830007P12Rik), mRNA.                                            |
| scl0067238.2 233-S    | 32.9767 | 1.34 | 2810453I06Rik | NM 026050.1 | Mus musculus RIKEN cDNA 2810453I06 gene (2810453I06Rik), mRNA.                                            |
| scl0054613.2 126-S    | 32.94   | 1.4  | Siat10        | NM 018784.1 | Mus musculus sialyltransferase 10 (alpha-2,3-sialyltransferase VI) (Siat10), mRNA.                        |
| scl49488.8 241-S      | 32.9348 | 1.62 | Zfp263        | NM 148924.2 | Mus musculus zinc finger protein 263 (Zfp263), mRNA.                                                      |
| scl49959.3.1 23-S     | 32.9009 | 1.39 | Rpp21         | NM 026308.1 | Mus musculus ribonuclease P 21kDa subunit (human) (Rpp21), mRNA.                                          |
| scl18785.23 2-S       | 32.878  | 1.42 | A930025J12Rik | NM 173734   | Mus musculus RIKEN cDNA A930025J12 gene (A930025J12Rik), mRNA.                                            |
| scl41798.24 462-S     | 32.8712 | 1.49 | Vps54         | NM 139061.2 | Mus musculus vacuolar protein sorting 54 (yeast) (Vps54), mRNA.                                           |
| scl00103850.1 287-S   | 32.8611 | 1.68 | Ni5m          | NM 134029.1 | Mus musculus 5,3-nucleotidase, mitochondrial (Ni5m), mRNA.                                                |
| scl37463.11 46-S      | 32.8484 | 1.47 | Mdm2          | NM 010786.2 | Mus musculus transformed mouse 3T3 cell double minute 2 (Mdm2), mRNA.                                     |
| scl50554.25.1 3-S     | 32.716  | 1.85 | Ddx11         | XM 128714.3 |                                                                                                           |
| scl24797.1 325-S      | 32.6811 | 1.87 | Usp48         | NM 028344.1 |                                                                                                           |
| scl00224613.2 5-S     | 32.6023 | 3.2  | E030034P13Rik | NM 153791.1 | Mus musculus RIKEN cDNA E030034P13 gene (E030034P13Rik), mRNA.                                            |
| scl0020452.1 241-S    | 32.5395 | 1.48 | Siat8d        | NM 009183.1 | Mus musculus sialyltransferase 8 (alpha-2, 8-sialyltransferase D) (Siat8d), mRNA.                         |
| scl0338522.1 21-S     | 32.5085 | 2.21 | 9230115A19Rik | XM 110546.2 |                                                                                                           |
| scl27313.11.1 0-S     | 32.4511 | 3    | Tesc          | NM 021344.2 | Mus musculus tescalcin (Tesc), mRNA.                                                                      |
| scl0240263.2 0-S      | 32.4414 | 2.06 | Fem1c         | NM 173423.1 | Mus musculus fem-1 homolog c (C.elegans) (Fem1c), mRNA.                                                   |
| scl49300.12 501-S     | 32.4173 | 1.47 | St6gal1       | NM 145933.2 | Mus musculus beta galactoside alpha 2,6 sialyltransferase 1 (St6gal1), mRNA.                              |
| scl0056469.2 305-S    | 32.4155 | 1.58 | Pias1         | NM 019663.2 | Mus musculus protein inhibitor of activated STAT 1 (Pias1), mRNA.                                         |
| scl066404.9 27-S      | 32.4022 | 1.49 | 2410001C21Rik | NM 025542.1 | Mus musculus RIKEN cDNA 2410001C21 gene (2410001C21Rik), mRNA.                                            |
| scl056438.5 27-S      | 32.3511 | 1.32 | Rbx1          | NM 019712.2 | Mus musculus ring-box 1 (Rbx1), mRNA.                                                                     |
| scl067078.2 14-S      | 32.3321 | 1.33 | 1700012G19Rik | NM 025954.2 | Mus musculus RIKEN cDNA 1700012G19 gene (1700012G19Rik), mRNA.                                            |
| scl0012091.2 274-S    | 32.2767 | 1.77 | Glb1          | NM 009752.1 | Mus musculus galactosidase, beta 1 (Glb1), mRNA.                                                          |
| scl00214505.2 7-S     | 32.2551 | 1.57 | AU067744      | NM 172529.1 | Mus musculus expressed sequence AU067744 (AU067744), mRNA.                                                |
| scl00236790.1 87-S    | 32.2108 | 1.49 | 6330505F04Rik | NM 172779.1 | Mus musculus RIKEN cDNA 6330505F04 gene (6330505F04Rik), mRNA.                                            |
| scl027418.18 28-S     | 32.141  | 1.42 | Mkin1         | NM 013791.1 | Mus musculus muskelin 1, intracellular mediator containing kelch motifs (Mkin1), mRNA.                    |

|               |           |         |       |               |             |                                                                                                                                                                 |
|---------------|-----------|---------|-------|---------------|-------------|-----------------------------------------------------------------------------------------------------------------------------------------------------------------|
| scl53438.9.1  | 79-S      | 32.1245 | 1.33  | Ndufv1        | NM_133666.1 | Mus musculus NADH dehydrogenase (ubiquinone) flavoprotein 1 (Ndufv1), mRNA.                                                                                     |
| scl00319161.1 | 8-S       | 32.0948 | 2.74  | Hist1h4m      | NM_175657   | Mus musculus histone 1, H4m (Hist1h4m), mRNA.                                                                                                                   |
| scl0067246.1  | 211-S     | 32.071  | 1.42  | 2810474O19Rik | XM_132966.3 | Mus musculus RIKEN cDNA 2810474O19 gene (2810474O19Rik), mRNA.                                                                                                  |
| scl00218294.2 | 195-S     | 32.0245 | 2.08  | Cdc14b        | NM_172587.2 | Mus musculus CDC14 cell division cycle 14 homolog B (S. cerevisiae) (Cdc14b), mRNA.                                                                             |
| scl00347722.2 | 310-S     | 31.971  | 1.62  | Centg2        | NM_178119.2 | Mus musculus centaurin, gamma 2 (Centg2), mRNA.                                                                                                                 |
| scl074569.1   | 282-S     | 31.9656 | 1.76  | Ttc17         | NM_183106.1 |                                                                                                                                                                 |
| scl050670.2   | 184 270-S | 31.9317 | 2.12  | 2310039H08Rik | NM_025966.2 | Mus musculus RIKEN cDNA 2310039H08 gene (2310039H08Rik), mRNA.                                                                                                  |
| scl0001153.1  | 10-S      | 31.9175 | 12.37 | C330016K18Rik | XM_132642.4 | Mus musculus RIKEN cDNA C330016K18 gene (C330016K18Rik), mRNA.                                                                                                  |
| scl019720.8   | 242-S     | 31.9095 | 1.34  | Trim27        | NM_009054   | Mus musculus tripartite motif protein 27 (Trim27), mRNA.                                                                                                        |
| scl35960.12   | 340-S     | 31.9042 | 1.45  | Tmem24        | XM_134795.3 |                                                                                                                                                                 |
| scl36833.9.1  | 209-S     | 31.8809 | 1.57  | Rpl4          | NM_024212.2 | Mus musculus ribosomal protein L4 (Rpl4), mRNA.                                                                                                                 |
| scl40755.5.1  | 55-S      | 31.8738 | 1.78  | D11Wsu47e     | NM_177777.3 | Mus musculus DNA segment, Chr 11, Wayne State University 47, expressed (D11Wsu47e), mRNA.                                                                       |
| scl066073.8   | 269-S     | 31.8738 | 1.48  | 0610040B21Rik | NM_025334.2 | Mus musculus RIKEN cDNA 0610040B21 gene (0610040B21Rik), mRNA.                                                                                                  |
| scl37947.10   | 418-S     | 31.8661 | 1.38  | Tde2          | NM_019760   | Mus musculus tumor differentially expressed 2 (Tde2), mRNA.                                                                                                     |
| scl0066706.2  | 314-S     | 31.7771 | 1.4   | 4733401H18Rik | NM_023247.1 | Mus musculus RIKEN cDNA 4733401H18 gene (4733401H18Rik), mRNA.                                                                                                  |
| scl44037.11.1 | 29-S      | 31.7663 | 1.41  | Dtnbp1        | NM_025772.3 | Mus musculus dystrobrevin binding protein 1 (Dtnbp1), mRNA.                                                                                                     |
| scl073341.1   | 128-S     | 31.7411 | 1.59  | Arhgef6       | NM_152801.1 | Mus musculus Rac/Cdc42 guanine nucleotide exchange factor (GEF) 6 (Arhgef6), mRNA.                                                                              |
| scl37440.14   | 650-S     | 31.7223 | 1.74  | Irak3         | NM_028679.2 | Mus musculus interleukin-1 receptor-associated kinase 3 (Irak3), mRNA.                                                                                          |
| scl0076895.2  | 316-S     | 31.625  | 1.84  | Bicd2         | NM_029791.2 | Mus musculus bicaudal D homolog 2 (Drosophila) (Bicd2), mRNA.                                                                                                   |
| scl53173.13   | 456-S     | 31.5579 | 1.5   | E430027O22Rik | XM_129248.4 | Mus musculus RIKEN cDNA E430027O22 gene (E430027O22Rik), mRNA.                                                                                                  |
| scl28579.2    | 420-S     | 31.4804 | 1.64  | Fin14         |             | Mus musculus fibroblast growth factor inducible 14 (Fin14), mRNA.                                                                                               |
| scl52862.7    | 705-S     | 31.4431 | 1.51  | Cdca5         | NM_026410.1 |                                                                                                                                                                 |
| scl0067980.2  | 203-S     | 31.3947 | 1.7   | Gnpda2        | NM_027681.1 | Mus musculus glucosamine-6-phosphate deaminase 2 (Gnpda2), mRNA.                                                                                                |
| scl0056390.1  | 292-S     | 31.234  | 1.48  | Ssca1         | NM_020491   | Mus musculus Sjogrens syndrome/scleroderma autoantigen 1 homolog (human) (Ssca1), mRNA.                                                                         |
| scl059040.12  | 45-S      | 31.2234 | 1.44  | Rhot1         | NM_021536.5 | Mus musculus ras homolog gene family, member T1 (Rhot1), mRNA.                                                                                                  |
| scl39808.15.1 | 10-S      | 31.1541 | 1.7   | Aatf          | NM_019816.1 | Mus musculus apoptosis antagonizing transcription factor (Aatf), mRNA.                                                                                          |
| scl00212531.2 | 67-S      | 31.1082 | 2.53  | Sh3bqrl2      | NM_172507.2 |                                                                                                                                                                 |
| scl000674.1   | 0-S       | 31.09   | 2.4   | Irgb1         | NM_010578.1 | Mus musculus integrin beta 1 (fibronectin receptor beta) (Irgb1), mRNA.                                                                                         |
| scl47641.14   | 223-S     | 31.0687 | 1.62  | D15Erd781e    | NM_145476.2 |                                                                                                                                                                 |
| scl056529.1   | 95-S      | 31.0454 | 1.32  | Spc18         | NM_019951.1 | Mus musculus signal peptidase complex (Spc18), mRNA.                                                                                                            |
| scl0258771.1  | 118-S     | 31.0294 | 10.9  | Olf473        | NM_146775.1 | Mus musculus olfactory receptor 473 (Olf473), mRNA.                                                                                                             |
| scl015441.12  | 277-S     | 31.0292 | 1.32  | Hp1bp3        | NM_010470.1 | Mus musculus heterochromatin protein 1, binding protein 3 (Hp1bp3), mRNA.                                                                                       |
| scl052397.1   | 25-S      | 30.9866 | 1.63  | D5Erd689e     | XM_358356.1 | Mus musculus DNA segment, Chr 5, ERATO Doi 689, expressed (D5Erd689e), mRNA.                                                                                    |
| scl0002898.1  | 1-S       | 30.9643 | 1.93  | Sms           | NM_009214   | Mus musculus spermine synthase (Sms), mRNA.                                                                                                                     |
| scl25152.5.1  | 78-S      | 30.9521 | 1.45  | Magoh         | NM_010760.1 | Mus musculus mago-nashi homolog, proliferation-associated (Drosophila) (Magoh), mRNA.                                                                           |
| scl00225358.2 | 258-S     | 30.9415 | 1.7   | 2610024E20Rik | NM_146084.1 |                                                                                                                                                                 |
| scl023880.13  | 4-S       | 30.9264 | 1.42  | Fyb           | NM_011815.1 | Mus musculus FYN binding protein (Fyb), mRNA.                                                                                                                   |
| scl015384.1   | 1-S       | 30.8768 | 1.3   | Hnrpab        | NM_010448.2 | Mus musculus heterogeneous nuclear ribonucleoprotein A/B (Hnrpab), mRNA.                                                                                        |
| scl0105841.13 | 268-S     | 30.876  | 1.64  | E030003N15Rik | XM_128129.4 | Mus musculus RIKEN cDNA E030003N15 gene (E030003N15Rik), mRNA.                                                                                                  |
| scl4899.1.1   | 252-S     | 30.8362 | 11.44 | Olf1188       | NM_146919.1 | Mus musculus olfactory receptor 1188 (Olf1188), mRNA.                                                                                                           |
| scl0003304.1  | 37-S      | 30.8233 | 2.29  | Xrn2          | NM_011917   | Mus musculus 5-3 exoribonuclease 2 (Xrn2), mRNA.                                                                                                                |
| scl0066125.2  | 310-S     | 30.7812 | 1.35  | Sf3b5         | NM_175102.2 |                                                                                                                                                                 |
| scl30066.5    | 708-S     | 30.7511 | 1.89  | 6330407D12Rik | NM_175098.2 | Mus musculus RIKEN cDNA 6330407D12 gene (6330407D12Rik), mRNA.                                                                                                  |
| scl16332.2    | 164-S     | 30.7509 | 1.38  | Cxcr4         | NM_009911.2 | Mus musculus chemokine (C-X-C motif) receptor 4 (Cxcr4), mRNA.                                                                                                  |
| scl51323.13.1 | 30-S      | 30.7304 | 1.63  | Mppe1         | NM_172630.1 | Mus musculus metallophosphoesterase 1 (Mppe1), mRNA.                                                                                                            |
| scl35560.5    | 28-S      | 30.7132 | 1.64  | Cox7a2        | NM_009945.2 | Mus musculus cytochrome c oxidase, subunit VIIa 2 (Cox7a2), mRNA.                                                                                               |
| scl0068915.2  | 300-S     | 30.6997 | 2.04  | Vars2l        | NM_175137.3 | Mus musculus valyl-tRNA synthetase 2-like (Vars2l), mRNA.                                                                                                       |
| scl28688.42   | 395-S     | 30.4889 | 1.34  | Nup210        | NM_018815.1 | Mus musculus nucleoporin 210 (Nup210), mRNA.                                                                                                                    |
| scl016784.1   | 5-S       | 30.4831 | 1.33  | Lamp2         | NM_010685.2 | Mus musculus lysosomal membrane glycoprotein 2 (Lamp2), mRNA.                                                                                                   |
| scl0231086.16 | 205-S     | 30.4698 | 1.32  | Hadhb         | NM_145558.1 | Mus musculus hydroxacyl-Coenzyme A dehydrogenase/3-ketoacyl-Coenzyme A thiolase/enoyl-Coenzyme A hydratase (trifunctional protein), beta subunit (Hadhb), mRNA. |
| scl0023894.2  | 0-S       | 30.4657 | 1.45  | Gif2h2        | NM_022011.2 | Mus musculus general transcription factor II h, polypeptide 2 (Gif2h2), mRNA.                                                                                   |
| scl48556.8.1  | 18-S      | 30.4622 | 1.39  | 2010319C14Rik | NM_024464.2 | Mus musculus RIKEN cDNA 2010319C14 gene (2010319C14Rik), mRNA.                                                                                                  |
| scl52806.22.1 | 43-S      | 30.439  | 1.5   | Pitpnm1       | NM_008851.1 |                                                                                                                                                                 |
| scl53451.16.1 | 293-S     | 30.3892 | 3.61  | 0710001P18Rik | NM_026720.1 | Mus musculus RIKEN cDNA 0710001P18 gene (0710001P18Rik), mRNA.                                                                                                  |
| scl0052712.1  | 238-S     | 30.3858 | 1.61  | Zfp535        | NM_026107.2 | Mus musculus zinc finger protein 535 (Zfp535), mRNA.                                                                                                            |
| scl00380608.1 | 88-S      | 30.3752 | 7.08  | Tagap         | NM_147155   |                                                                                                                                                                 |

|                       |         |       |               |              |                                                                                                       |
|-----------------------|---------|-------|---------------|--------------|-------------------------------------------------------------------------------------------------------|
| scI44364.2.1 224-S    | 30.3199 | 5.24  | C86987        | XM 127523.2  | Mus musculus expressed sequence C86987 (C86987), mRNA.                                                |
| scI0225995.2 210-S    | 30.3167 | 1.34  | D030056L22    | NM 177640.2  | Mus musculus hypothetical protein D030056L22 (D030056L22), mRNA.                                      |
| scI40534.12.1 29-S    | 30.2881 | 1.55  | Tbrg4         | NM 134011.1  | Mus musculus transforming growth factor beta regulated gene 4 (Tbrg4), mRNA.                          |
| scI47060.10.1 13-S    | 30.2398 | 1.82  | 9130210N20Rik | NM 172607.2  | Mus musculus RIKEN cDNA 9130210N20 gene (9130210N20Rik), mRNA.                                        |
| scI0330260.1 61-S     | 30.1494 | 1.32  | Pon2          | NM 183308.1  | Mus musculus paraoxonase 2 (Pon2), mRNA.                                                              |
| scI017260.8 51-S      | 30.0538 | 1.95  | Mef2c         | NM 025282.1  | Mus musculus myocyte enhancer factor 2C (Mef2c), mRNA.                                                |
| scI054624.14 263-S    | 29.9886 | 1.44  | 5730511K23Rik | NM 019458.2  | Mus musculus RIKEN cDNA 5730511K23 gene (5730511K23Rik), mRNA.                                        |
| scI32942.2 625-S      | 29.9763 | 1.48  | Zfp574        | NM 175477.2  |                                                                                                       |
| scI0016071.1 62-S     | 29.9544 | 2.4   | Igk-C         | XM 132633.4  |                                                                                                       |
| scI30665.8.1 14-S     | 29.927  | 2.17  | 1110032O16Rik | XM 133813.4  | Mus musculus RIKEN cDNA 1110032O16 gene (1110032O16Rik), mRNA.                                        |
| scI28535.9.1 27-S     | 29.9192 | 1.32  | Sec13l1       | NM 024206.3  | Mus musculus SEC13-like 1 (S. cerevisiae) (Sec13l1), mRNA.                                            |
| scI44989.1 487-S      | 29.9185 | 1.53  | Hist1h1c      | NM 015786    | Mus musculus histone 1, H1c (Hist1h1c), mRNA.                                                         |
| scI37317.9.1 34-S     | 29.9118 | 1.37  | Casp1         | NM 009807.1  | Mus musculus caspase 1 (Casp1), mRNA.                                                                 |
| scI25760.31.1 106-S   | 29.8912 | 1.91  | Flt1          | NM 010228.2  | Mus musculus FMS-like tyrosine kinase 1 (Flt1), mRNA.                                                 |
| scI32898.7.1 80-S     | 29.8517 | 1.35  | Blvrb         | NM 144923    | Mus musculus biliverdin reductase B (flavin reductase (NADPH)) (Blvrb), mRNA.                         |
| scI0210711.2 41-S     | 29.7872 | 1.41  | 1110007A13Rik | NM 145955.2  | Mus musculus RIKEN cDNA 1110007A13 gene (1110007A13Rik), mRNA.                                        |
| scI056433.4 275-S     | 29.7847 | 1.37  | Vps29         | NM 019780.1  | Mus musculus vacuolar protein sorting 29 (S. pombe) (Vps29), mRNA.                                    |
| scI24870.7.1 13-S     | 29.7509 | 2.41  | D030015G18Rik | NM 146155.2  | Mus musculus RIKEN cDNA D030015G18 gene (D030015G18Rik), mRNA.                                        |
| scI0019769.2 219-S    | 29.7307 | 1.44  | Rit1          | NM 009069.2  | Mus musculus Ras-like without CAAX 1 (Rit1), mRNA.                                                    |
| scI24875.11.1 30-S    | 29.6102 | 1.52  | Taf12         | NM 025579.1  | Mus musculus TAF12 RNA polymerase II, TATA box binding protein (TBP)-associated factor (Taf12), mRNA. |
| scI067596.7 211-S     | 29.609  | 2.56  | 5830405N20Rik | NM 183264.1  | Mus musculus RIKEN cDNA 5830405N20 gene (5830405N20Rik), mRNA.                                        |
| scI39206.7 318-S      | 29.5892 | 1.39  | BC017643      | NM 144832.1  | Mus musculus cDNA sequence BC017643 (BC017643), mRNA.                                                 |
| scI026403.1 197-S     | 29.5541 | 1.46  | Map3k11       | NM 022012.2  | Mus musculus mitogen activated protein kinase kinase kinase 11 (Map3k11), mRNA.                       |
| scI37497.8.1 151-S    | 29.514  | 1.42  | Gilpr1        | NM 028608.1  | Mus musculus GLI pathogenesis-related 1 (glioma) (Gilpr1), mRNA.                                      |
| scI00320074.1 330-S   | 29.4872 | 2.68  | Rxrip110      | NM 011307.1  |                                                                                                       |
| scI0018549.1 176-S    | 29.3832 | 9.17  | Pcsk2         | NM 008792.3  | Mus musculus proprotein convertase subtilisin/kexin type 2 (Pcsk2), mRNA.                             |
| scI35732.23.1 51-S    | 29.382  | 1.42  | Kif23         | NM 024245    | Mus musculus kinesin family member 23 (Kif23), mRNA.                                                  |
| scI50814.22.1 1-S     | 29.3488 | 1.36  | Creb1         | NM 017406.2  | Mus musculus cAMP responsive element binding protein-like 1 (Creb1), mRNA.                            |
| scI21990.8.1 193-S    | 29.2679 | 1.42  | Prcc          | NM 0033573.1 | Mus musculus papillary renal cell carcinoma (translocation-associated) (Prcc), mRNA.                  |
| scI052120.1 108-S     | 29.2461 | 1.88  | D8Erd354e     | NM 133970    | Mus musculus DNA segment, Chr 8, ERATO Doi 354, expressed (D8Erd354e), mRNA.                          |
| scI0067427.2 328-S    | 29.2078 | 1.41  | Rps20         | NM 026147.3  | Mus musculus ribosomal protein S20 (Rps20), mRNA.                                                     |
| scI017749.3 11-S      | 29.1772 | 1.54  | Polr2k        | NM 023127    | Mus musculus polymerase (RNA) II (DNA directed) polypeptide K (Polr2k), mRNA.                         |
| scI0069821.2 297-S    | 29.1675 | 1.49  | 1810059A23Rik | NM 178051.3  |                                                                                                       |
| scI014081.20 10-S     | 29.1665 | 1.52  | Acs1          | NM 007981.2  | Mus musculus acyl-CoA synthetase long-chain family member 1 (Acs1), mRNA.                             |
| scI35708.10 49-S      | 29.1546 | 2.61  | Smad3         | NM 016769    |                                                                                                       |
| scI50798.28.1 41-S    | 29.1459 | 1.57  | Vars2         | NM 011690.2  | Mus musculus valyl-tRNA synthetase 2 (Vars2), mRNA.                                                   |
| scI000076.1 111 REVCC | 29.1379 | 1.52  | D11Wsu99e     | NM 013581.2  | Mus musculus DNA segment, Chr 11, Wayne State University 99, expressed (D11Wsu99e), mRNA.             |
| scI098193.14 109-S    | 29.1179 | 1.46  | Wdr42a        | NM 153555.1  |                                                                                                       |
| scI074549.2 261-S     | 29.0769 | 1.74  | 9130404D08Rik | NM 028993.2  | Mus musculus RIKEN cDNA 9130404D08 gene (9130404D08Rik), mRNA.                                        |
| scI013481.4 295-S     | 29.0001 | 1.37  | Dpm2          | NM 010073.2  | Mus musculus dolichol-phosphate (beta-D) mannosyltransferase 2 (Dpm2), mRNA.                          |
| scI0101095.9 35-S     | 28.9716 | 1.58  | Zfp282        | NM 146175.2  | Mus musculus zinc finger protein 282 (Zfp282), mRNA.                                                  |
| scI076071.13 258-S    | 28.9713 | 2.14  | Gababrbp      | NM 178394.2  |                                                                                                       |
| scI000348.1 43-S      | 28.9239 | 10.56 | Rgr           | NM 021340.2  | Mus musculus retinal G protein coupled receptor (Rgr), mRNA.                                          |
| scI0215160.4 168-S    | 28.9195 | 2.17  | Rhbd17        | NM 146002.1  |                                                                                                       |
| scI53474.8.1 75-S     | 28.8759 | 1.35  | Ccs           | NM 016892.2  | Mus musculus copper chaperone for superoxide dismutase (Ccs), mRNA.                                   |
| scI019395.3 4-S       | 28.8611 | 1.88  | Rasgrp2       | XM 359299.1  | Mus musculus RAS, guanyl releasing protein 2 (Rasgrp2), mRNA.                                         |
| scI48157.24.1 63-S    | 28.805  | 5.78  | Wdr9          | NM 145125.1  | Mus musculus WD repeat domain 9 (Wdr9), mRNA.                                                         |
| scI38001.5.1 73-S     | 28.7932 | 1.46  | 1700021F05Rik | NM 026411.1  | Mus musculus RIKEN cDNA 1700021F05 gene (1700021F05Rik), mRNA.                                        |
| scI0072020.1 140-S    | 28.7391 | 2.09  | 1600021C16Rik | NM 028059.1  | Mus musculus RIKEN cDNA 1600021C16 gene (1600021C16Rik), mRNA.                                        |
| scI53840.18.1 253-S   | 28.7337 | 3.56  | Sytl4         | NM 013757.1  | Mus musculus synaptotagmin-like 4 (Sytl4), mRNA.                                                      |
| scI067945.1 102-S     | 28.7148 | 1.88  | Rpl41         | NM 018860.2  | Mus musculus ribosomal protein L41 (Rpl41), mRNA.                                                     |
| scI36337.4.1 30-S     | 28.672  | 1.31  | 1500010M16Rik | NM 026892.1  | Mus musculus RIKEN cDNA 1500010M16 gene (1500010M16Rik), mRNA.                                        |
| scI38624.3 492-S      | 28.6691 | 2.19  | D10Wsu102e    | NM 026579.2  | Mus musculus DNA segment, Chr 10, Wayne State University 102, expressed (D10Wsu102e), mRNA.           |
| scI28314.7.1 50-S     | 28.658  | 1.44  | 2010012C16Rik | NM 025564.1  | Mus musculus RIKEN cDNA 2010012C16 gene (2010012C16Rik), mRNA.                                        |
| scI00104318.1 298-S   | 28.6082 | 1.46  | Csnk1d        | NM 027874.1  | Mus musculus casein kinase 1, delta (Csnk1d), transcript variant 2, mRNA.                             |
| scI24019.5 109-S      | 28.5578 | 1.39  | Cpt2          | NM 009949    | Mus musculus carnitine palmitoyltransferase 2 (Cpt2), mRNA.                                           |

|                     |         |       |               |             |                                                                                                                        |
|---------------------|---------|-------|---------------|-------------|------------------------------------------------------------------------------------------------------------------------|
| scl41586.4 460-S    | 28.4947 | 1.37  | D11Erd497e    | NM_029976.2 | Mus musculus DNA segment, Chr 11, ERATO Doi 497, expressed (D11Erd497e), mRNA.                                         |
| scl072686.1 177-S   | 28.4487 | 1.41  | Usp24         | XM_131566.5 |                                                                                                                        |
| scl075445.1 91-S    | 28.3866 | 5.72  | 1700008B15Rik | XM_485370   |                                                                                                                        |
| scl0208117.1 319-S  | 28.3247 | 2.41  | 4632417K02    | NM_177583.2 | Mus musculus hypothetical protein 4632417K02 (4632417K02), mRNA.                                                       |
| scl54357.9.1 59-S   | 28.3067 | 1.95  | Pfc           | XM_135820.3 | Mus musculus properdin factor, complement (Pfc), mRNA.                                                                 |
| scl0019699.2 228-S  | 28.2434 | 1.81  | Reln          | NM_011261.1 | Mus musculus reelin (Reln), mRNA.                                                                                      |
| scl072465.7 112-S   | 28.1599 | 1.61  | Zfp131        | NM_028245.1 | Mus musculus zinc finger protein 131 (Zfp131), mRNA.                                                                   |
| scl020973.4 189-S   | 28.1414 | 1.34  | Syng2         | NM_009304.1 | Mus musculus synaptogyrin 2 (Syng2), mRNA.                                                                             |
| scl40004.19.1 140-S | 28.0849 | 1.4   | Acadvl        | NM_017366   | Mus musculus acyl-Coenzyme A dehydrogenase, very long chain (Acadvl), mRNA.                                            |
| scl52435.3.1 22-S   | 28.0848 | 1.37  | Mrp143        | NM_053164.2 | Mus musculus mitochondrial ribosomal protein L43 (Mrp143), nuclear gene encoding mitochondrial protein, mRNA.          |
| scl0001312.1 33-S   | 28.0461 | 4.88  | Cacna1g       | NM_009783.1 | Mus musculus calcium channel, voltage-dependent, T type, alpha 1G subunit (Cacna1g), mRNA.                             |
| scl0069116.1 159-S  | 28.0446 | 2     | 1810009A16Rik | XM_355528.1 | Mus musculus RIKEN cDNA 1810009A16 gene (1810009A16Rik), mRNA.                                                         |
| scl17336.3.1 84-S   | 28.0306 | 1.6   | 2810025M15Rik | NM_027274.2 | Mus musculus RIKEN cDNA 2810025M15 gene (2810025M15Rik), mRNA.                                                         |
| scl067414.12 0-S    | 27.9777 | 1.5   | Mfn1          | NM_024200.2 | Mus musculus mitofusin 1 (Mfn1), mRNA.                                                                                 |
| scl33340.4 635-S    | 27.9075 | 1.94  | Txn14b        | NM_175646.2 |                                                                                                                        |
| scl0080718.1 88-S   | 27.9026 | 3.33  | Rab27b        | NM_030554.1 | Mus musculus RAB27b, member RAS oncogene family (Rab27b), mRNA.                                                        |
| scl44239.8 168-S    | 27.9017 | 1.68  | Zfp307        | NM_023685.2 |                                                                                                                        |
| scl21186.4.1 111-S  | 27.8704 | 1.84  | C430004E15Rik | NM_175286.2 | Mus musculus RIKEN cDNA C430004E15 gene (C430004E15Rik), mRNA.                                                         |
| scl0107173.1 330-S  | 27.8704 | 1.59  | A1428855      | NM_207220.1 | Mus musculus expressed sequence A1428855 (A1428855), mRNA.                                                             |
| scl0068379.1 280-S  | 27.8634 | 1.38  | Ciz1          | NM_028412.1 | Mus musculus CDKN1A interacting zinc finger protein 1 (Ciz1), mRNA.                                                    |
| scl19480.4 1-S      | 27.8178 | 1.53  | Zdhc12        | NM_025428.1 | Mus musculus zinc finger, DHHC domain containing 12 (Zdhc12), mRNA.                                                    |
| scl021858.1 100-S   | 27.8014 | 1.45  | Timp2         | NM_011594.2 | Mus musculus tissue inhibitor of metalloproteinase 2 (Timp2), mRNA.                                                    |
| scl39283.5.1 319-S  | 27.771  | 2.51  | 1300017K07Rik | NM_027919.1 | Mus musculus RIKEN cDNA 1300017K07 gene (1300017K07Rik), mRNA.                                                         |
| scl00231999.2 275-S | 27.752  | 3.4   | BC052360      | XM_132552.3 |                                                                                                                        |
| scl00234023.2 117-S | 27.6998 | 1.32  | 9430010O03Rik | NM_176849.2 | Mus musculus RIKEN cDNA 9430010O03 gene (9430010O03Rik), mRNA.                                                         |
| scl0023845.2 228-S  | 27.6855 | 3.09  | Clecsf5       | NM_021364.1 | Mus musculus C-type (calcium dependent, carbohydrate-recognition domain) lectin, superfamily member 5 (Clecsf5), mRNA. |
| scl50143.3.1 18-S   | 27.6443 | 1.56  | 0610039D01Rik | NM_026307.2 | Mus musculus RIKEN cDNA 0610039D01 gene (0610039D01Rik), mRNA.                                                         |
| scl54114.2 230-S    | 27.6053 | 5.28  | Rab39b        | NM_175122.2 | Mus musculus RAB39B, member RAS oncogene family (Rab39b), mRNA.                                                        |
| scl0026895.1 34-S   | 27.6015 | 1.71  | Cops7b        | NM_172974.1 | Mus musculus COP9 (constitutive photomorphogenic) homolog, subunit 7b (Arabidopsis thaliana) (Cops7b), mRNA.           |
| scl0380791.1 239-S  | 27.5989 | 2.13  | Igh-VJ558     | XM_354700   |                                                                                                                        |
| scl056772.1 0-S     | 27.5894 | 2.24  | A1839562      | NM_019914.2 | Mus musculus expressed sequence A1839562 (A1839562), mRNA.                                                             |
| scl0002306.1 28-S   | 27.5273 | 1.61  | XM_283061.1   | XM_283061.1 | Mus musculus RIKEN cDNA A630086P08 gene (A630086P08Rik), mRNA.                                                         |
| scl0076080.2 277-S  | 27.4839 | 1.89  | 5830472M02Rik | NM_181734.1 | Mus musculus RIKEN cDNA 5830472M02 gene (5830472M02Rik), mRNA.                                                         |
| scl00230316.2 241-S | 27.444  | 5.33  | Egfl5         | NM_172694.1 | Mus musculus EGF-like domain, multiple 5 (Egfl5), mRNA.                                                                |
| scl16458.7.1 28-S   | 27.4298 | 1.61  | Thap4         | NM_025920   | Mus musculus THAP domain containing 4 (Thap4), mRNA.                                                                   |
| scl40536.24.1 162-S | 27.4069 | 1.36  | Myo1g         | NM_178440.2 | Mus musculus myosin IG (Myo1g), mRNA.                                                                                  |
| scl51004.4 55-S     | 27.403  | 1.74  | Sepx1         | NM_013759.1 |                                                                                                                        |
| scl0217558.10 30-S  | 27.3901 | 4.92  | 6030408C04Rik | XM_126912.4 | Mus musculus RIKEN cDNA 6030408C04 gene (6030408C04Rik), mRNA.                                                         |
| scl0012725.1 238-S  | 27.3758 | 1.44  | C1cn3         |             |                                                                                                                        |
| scl012464.14 38-S   | 27.346  | 1.29  | Cct4          | NM_009837.1 | Mus musculus chaperonin subunit 4 (delta) (Cct4), mRNA.                                                                |
| scl4320.1.1 316-S   | 27.3385 | 11.45 | Olf1r1107     | NM_146844.1 | Mus musculus olfactory receptor 1107 (Olf1r1107), mRNA.                                                                |
| scl00210789.2 87-S  | 27.3283 | 6.85  | Tbc1d4        | NM_173380.1 | Mus musculus TBC1 domain family, member 4 (Tbc1d4), mRNA.                                                              |
| scl46811.9.582 26-S | 27.3186 | 1.59  | 3000003F02Rik | NM_172437.1 | Mus musculus RIKEN cDNA 3000003F02 gene (3000003F02Rik), mRNA.                                                         |
| scl0093760.1 64-S   | 27.3098 | 1.83  | Arid1a        | NM_033566.1 | Mus musculus AT rich interactive domain 1A (Swi1 like) (Arid1a), mRNA.                                                 |
| scl0056208.2 9-S    | 27.2681 | 1.31  | Becn1         | NM_019584.2 | Mus musculus beclin 1 (coiled-coil, myosin-like BCL2-interacting protein) (Becn1), mRNA.                               |
| scl28701.8.1 115-S  | 27.2245 | 1.49  | 0710001P09Rik | NM_025351.2 | Mus musculus RIKEN cDNA 0710001P09 gene (0710001P09Rik), mRNA.                                                         |
| scl020320.8 193-S   | 27.1867 | 1.35  | Sdfr1         | NM_009145.1 | Mus musculus stromal cell derived factor receptor 1 (Sdfr1), mRNA.                                                     |
| scl34424.10 15-S    | 27.0891 | 1.71  | Tk2           | NM_021028.2 | Mus musculus thymidine kinase 2, mitochondrial (Tk2), mRNA.                                                            |
| scl066989.6 1-S     | 27.0059 | 1.46  | 2410004N11Rik | NM_025888.2 | Mus musculus RIKEN cDNA 2410004N11 gene (2410004N11Rik), mRNA.                                                         |
| scl0002489.1 318-S  | 26.9846 | 1.57  | 4921518A06Rik | NM_198293.1 | Mus musculus RIKEN cDNA 4921518A06 gene (4921518A06Rik), mRNA.                                                         |
| scl00226527.1 138-S | 26.9528 | 10.68 | BC026585      | XM_129546.2 | Mus musculus cDNA sequence BC026585 (BC026585), mRNA.                                                                  |
| scl19085.2 285-S    | 26.9438 | 5.28  | Neurod1       | NM_010894.1 | Mus musculus neurogenic differentiation 1 (Neurod1), mRNA.                                                             |
| scl0223773.9 321-S  | 26.929  | 1.45  | Zbed4         | NM_181412.2 |                                                                                                                        |
| scl054343.15 6-S    | 26.9118 | 1.68  | Atf7ip        | NM_019426.2 | Mus musculus activating transcription factor 7 interacting protein (Atf7ip), mRNA.                                     |
| scl26735.47.1 66-S  | 26.8596 | 1.75  | Ift172        | NM_026298.4 | Mus musculus intraflagellar transport 172 (Ift172), mRNA.                                                              |
| scl022245.1 319-S   | 26.8503 | 1.34  | Uck1          | NM_011675.1 |                                                                                                                        |

|                       |         |       |               |             |                                                                                                        |
|-----------------------|---------|-------|---------------|-------------|--------------------------------------------------------------------------------------------------------|
| sci0018010.2 202-S    | 26.7838 | 1.42  | Neu1          | NM_010893.2 | Mus musculus neuraminidase 1 (Neu1), mRNA.                                                             |
| sci18004.30 24-S      | 26.7822 | 1.47  | Tpp2          | NM_009418.1 | Mus musculus tripeptidyl peptidase II (Tpp2), mRNA.                                                    |
| sci48822.17 669-S     | 26.764  | 2.57  | D230007K08Rik | NM_175547.2 | Mus musculus RIKEN cDNA D230007K08 gene (D230007K08Rik), mRNA.                                         |
| sci99554.8 358-S      | 26.7527 | 1.29  | Rab5c         | NM_024456   | Mus musculus RAB5C, member RAS oncogene family (Rab5c), mRNA.                                          |
| sci24032.3.148_1-S    | 26.7308 | 3.52  | 2210012G02Rik | NM_025617.1 | Mus musculus RIKEN cDNA 2210012G02 gene (2210012G02Rik), mRNA.                                         |
| sci46589.23.1 15-S    | 26.7087 | 1.58  | 2310021P13Rik | XM_127591.4 |                                                                                                        |
| sci0108071.1 257-S    | 26.6553 | 10.55 | Grm5          | XM_149971.3 | Mus musculus glutamate receptor, metabotropic 5 (Grm5), mRNA.                                          |
| sci49695.8 112-S      | 26.5995 | 1.34  | Vapa          | NM_013933.2 | Mus musculus vesicle-associated membrane protein, associated protein A (Vapa), mRNA.                   |
| sci35398.12.2 77-S    | 26.5759 | 2.25  | Alas1         | NM_020559.1 | Mus musculus aminolevulinic acid synthase 1 (Alas1), mRNA.                                             |
| sci074645.1 117-S     | 26.569  | 1.41  | 4930431B09Rik | XM_207778.3 | Mus musculus RIKEN cDNA 4930431B09 gene (4930431B09Rik), mRNA.                                         |
| sci50582.4.1 9-S      | 26.5678 | 1.35  | Cjpp          | NM_017393   | Mus musculus caseinolytic protease, ATP-dependent, proteolytic subunit homolog (E. coli) (Cjpp), mRNA. |
| sci0017314.1 97-S     | 26.5647 | 1.77  | Mgmt          | NM_008598.1 | Mus musculus O-6-methylguanine-DNA methyltransferase (Mgmt), mRNA.                                     |
| sci00268996.2 185-S   | 26.5559 | 1.34  | Ss18          | NM_009280.1 | Mus musculus synovial sarcoma translocation, Chromosome 18 (Ss18), mRNA.                               |
| sci16390.7 3-S        | 26.5455 | 1.55  | Ralb          | NM_022327.3 | Mus musculus v-rat simian leukemia viral oncogene homolog B (ras related) (Ralb), mRNA.                |
| sci28793.10 326-S     | 26.5139 | 1.63  | Stambp        | NM_024239.1 | Mus musculus Stam binding protein (Stambp), mRNA.                                                      |
| sci49146.12.1 4-S     | 26.4737 | 1.54  | 2610033C09Rik | NM_026407.2 | Mus musculus RIKEN cDNA 2610033C09 gene (2610033C09Rik), mRNA.                                         |
| sci54140.7.1 25-S     | 26.4585 | 1.41  | Dnase11       | NM_027109.1 |                                                                                                        |
| sci47524.3.1 1-S      | 26.4522 | 1.33  | 2310016M24Rik | NM_183256.1 | Mus musculus RIKEN cDNA 2310016M24 gene (2310016M24Rik), mRNA.                                         |
| sci18972.12.1 41-S    | 26.4484 | 1.46  | 1810020C19Rik | XM_130317.5 | Mus musculus RIKEN cDNA 1810020C19 gene (1810020C19Rik), mRNA.                                         |
| sci00105348.2 131-S   | 26.3898 | 1.35  | Golph2        | NM_027307.1 | Mus musculus golgi phosphoprotein 2 (Golph2), mRNA.                                                    |
| sci22690.20.1 0-S     | 26.3862 | 4.03  | 2810453L12Rik | XM_131155.3 | Mus musculus RIKEN cDNA 2810453L12 gene (2810453L12Rik), mRNA.                                         |
| sci050850.17 73-S     | 26.3763 | 1.6   | Spq4          | NM_016962.1 | Mus musculus spastic paraplegia 4 homolog (human) (Spq4), mRNA.                                        |
| sci30706.6.2 3-S      | 26.3077 | 10.94 | 9430065N20Rik | NM_175435.2 | Mus musculus RIKEN cDNA 9430065N20 gene (9430065N20Rik), mRNA.                                         |
| sci27465.5 88-S       | 26.2784 | 3.62  | 6330405H19    | XM_358637.1 |                                                                                                        |
| sci18013.4 456-S      | 26.2327 | 1.52  | A1597479      | NM_133818.1 | Mus musculus expressed sequence A1597479 (A1597479), mRNA.                                             |
| sci53028.7 552-S      | 26.2012 | 1.62  | Trim8         | NM_053100.1 | Mus musculus tripartite motif protein 8 (Trim8), mRNA.                                                 |
| sci24398.4.1 27-S     | 26.1339 | 1.68  | Hint2         | XM_143732.2 |                                                                                                        |
| sci36496.9.1 37-S     | 26.1275 | 1.5   | Tusc4         | NM_018879.1 | Mus musculus tumor suppressor candidate 4 (Tusc4), mRNA.                                               |
| sci20535.2.1 122-S    | 26.0785 | 8.81  | A930018P22Rik | NM_026634.1 | Mus musculus RIKEN cDNA A930018P22 gene (A930018P22Rik), mRNA.                                         |
| sci30062.4.1 1-S      | 26.0724 | 2.49  | Npy           | NM_023456.2 | Mus musculus neuropeptide Y (Npy), mRNA.                                                               |
| sci00100169.1 330-S   | 26.0261 | 1.43  | Phactr4       | NM_175306.2 |                                                                                                        |
| sci52860.17 315-S     | 25.9969 | 1.5   | Synn1         | NM_028769.4 |                                                                                                        |
| sci36111.9.1 0-S      | 25.9928 | 1.37  | Rp9h          | NM_018739.1 | Mus musculus retinitis pigmentosa 9 homolog (human) (Rp9h), mRNA.                                      |
| sci016568.8 47-S      | 25.9671 | 2.07  | Kif3a         | NM_008443.2 | Mus musculus kinesin family member 3A (Kif3a), mRNA.                                                   |
| sci00104681.2 288-S   | 25.9189 | 1.43  | Slc16a6       | NM_134038.1 | Mus musculus solute carrier family 16 (monocarboxylic acid transporters), member 6 (Slc16a6), mRNA.    |
| sci0067384.1 276-S    | 25.909  | 1.67  | Bag4          | NM_026121.1 | Mus musculus BCL2-associated athanogene 4 (Bag4), mRNA.                                                |
| sci0075991.1 191-S    | 25.8735 | 1.52  | 5033405K12Rik | NM_153567.1 | Mus musculus RIKEN cDNA 5033405K12 gene (5033405K12Rik), mRNA.                                         |
| sci36214.3 394-S      | 25.8562 | 1.76  | Gbif          | NM_019683.2 | Mus musculus globin inducing factor, fetal (Gbif), mRNA.                                               |
| sci0078655.1 180-S    | 25.8508 | 1.37  | Eif3s1        | NM_144545.1 | Mus musculus eukaryotic translation initiation factor 3, subunit 1 alpha (Eif3s1), mRNA.               |
| sci37753.17.1 5-S     | 25.8166 | 1.65  | Polrmt        | NM_172551.1 | Mus musculus polymerase (RNA) mitochondrial (DNA directed) (Polrmt), mRNA.                             |
| sci28438.14 163-S     | 25.8082 | 2.03  | Slc2a3        | NM_011401.2 | Mus musculus solute carrier family 2 (facilitated glucose transporter), member 3 (Slc2a3), mRNA.       |
| sci019068.1 323-S     | 25.792  | 1.27  | Erh           | NM_007951.1 | Mus musculus enhancer of rudimentary homolog (Drosophila) (Erh), mRNA.                                 |
| sci36751.1.1150 295-S | 25.7776 | 6.99  | 4833444G19Rik | NM_177062.2 | Mus musculus RIKEN cDNA 4833444G19 gene (4833444G19Rik), mRNA.                                         |
| sci46038.17.1 26-S    | 25.7681 | 1.47  | Tdrd3         | NM_172605.2 | Mus musculus tudor domain containing 3 (Tdrd3), mRNA.                                                  |
| sci067938.1 193-S     | 25.6473 | 1.29  | Mylc2b        | NM_023402.1 |                                                                                                        |
| sci23525.7 662-S      | 25.623  | 1.6   | Agtrap        | NM_009642.3 | Mus musculus angiotensin II, type I receptor-associated protein (Agtrap), mRNA.                        |
| sci46956.4 124-S      | 25.6174 | 1.32  | 1300006C06Rik | NM_028792.1 | Mus musculus RIKEN cDNA 1300006C06 gene (1300006C06Rik), mRNA.                                         |
| sci17803.10.1 30-S    | 25.6145 | 1.27  | Arpc2         | XM_129773.5 | Mus musculus actin related protein 2/3 complex, subunit 2 (Arpc2), mRNA.                               |
| sci38366.14 414-S     | 25.5803 | 1.39  | Gns           | NM_029364.1 | Mus musculus glucosamine (N-acetyl)-6-sulfatase (Gns), mRNA.                                           |
| sci00215708.2 187-S   | 25.5654 | 4.7   | C030011O14Rik | NM_174868.2 | Mus musculus RIKEN cDNA C030011O14 gene (C030011O14Rik), mRNA.                                         |
| sci066151.5 253-S     | 25.4838 | 1.27  | 1110020C13Rik | NM_025385.2 | Mus musculus RIKEN cDNA 1110020C13 gene (1110020C13Rik), mRNA.                                         |
| sci49475.21 477-S     | 25.4338 | 1.4   | Mgrn1         | NM_029657.2 | Mus musculus mahogunin, ring finger 1 (Mgrn1), mRNA.                                                   |
| sci0078334.1 222-S    | 25.4334 | 1.53  | 2700084L06Rik | NM_198164.1 | Mus musculus RIKEN cDNA 2700084L06 gene (2700084L06Rik), mRNA.                                         |
| sci0001454.1 1188-S   | 25.3685 | 9.61  | B230396K10Rik | XM_205737.3 | Mus musculus RIKEN cDNA B230396K10 gene (B230396K10Rik), mRNA.                                         |
| sci00110160.1 313-S   | 25.3564 | 1.71  | Tcte3         | NM_011560   | Mus musculus t-complex-associated testis expressed 3 (Tcte3), mRNA.                                    |
| sci0067500.2 43-S     | 25.3388 | 1.37  | Ccar1         | NM_026201.1 | Mus musculus cell division cycle and apoptosis regulator 1 (Ccar1), mRNA.                              |

|                 |       |         |       |               |             |                                                                                                          |
|-----------------|-------|---------|-------|---------------|-------------|----------------------------------------------------------------------------------------------------------|
| scl24886.14     | 14-S  | 25.2863 | 1.45  | Laptm5        | NM_010686.2 | Mus musculus lysosomal-associated protein transmembrane 5 (Laptm5), mRNA.                                |
| scl36385.5      | 13-S  | 25.2803 | 1.36  | Cklfsf6       | NM_026036.1 | Mus musculus chemokine-like factor super family 6 (Cklfsf6), mRNA.                                       |
| scl25834.12     | 533-S | 25.2677 | 1.8   | Snx8          | NM_172277.1 | Mus musculus sorting nexin 8 (Snx8), mRNA.                                                               |
| scl33425.15     | 229-S | 25.2532 | 1.49  | D230025D16Rik | NM_145604.1 |                                                                                                          |
| scl26088.14.1   | 16-S  | 25.2286 | 1.47  | Aldh2         | NM_009656.1 | Mus musculus aldehyde dehydrogenase 2, mitochondrial (Aldh2), mRNA.                                      |
| scl45300.23     | 484-S | 25.2076 | 1.52  | Cog3          | NM_177381   | Mus musculus component of oligomeric golgi complex 3 (Cog3), mRNA.                                       |
| scl44903.11.3   | 96-S  | 25.2076 | 1.43  | Fars1         | NM_024274.1 | Mus musculus phenylalanine-tRNA synthetase 1 (mitochondrial) (Fars1), mRNA.                              |
| scl066448.4     | 32-S  | 25.1857 | 1.29  | Mrpl20        | NM_025570.1 | Mus musculus mitochondrial ribosomal protein L20 (Mrpl20), mRNA.                                         |
| scl32577.4.1    | 30-S  | 25.1614 | 1.64  | Mcee          | XM_133510.4 |                                                                                                          |
| scl45706.11     | 2-S   | 25.1452 | 1.31  | Ghitm         | NM_078478.1 | Mus musculus growth hormone inducible transmembrane protein (Ghitm), mRNA.                               |
| scl0227929.1    | 2-S   | 25.141  | 1.46  | Pscdbp        | NM_139200.2 | Mus musculus pleckstrin homology, Sec7 and coiled-coil domains, binding protein (Pscdbp), mRNA.          |
| scl0021339.1    | 180-S | 25.0683 | 2.56  | Taf1a         | NM_021466.1 | Mus musculus TATA box binding protein (Tbp)-associated factor, RNA polymerase I, A (Taf1a), mRNA.        |
| scl066726.1     | 64-S  | 25.0645 | 1.49  | 4921518A06Rik | NM_198293.1 | Mus musculus RIKEN cDNA 4921518A06 gene (4921518A06Rik), mRNA.                                           |
| scl24219.2.1    | 21-S  | 25.0456 | 1.29  | 3110001D03Rik | NM_025849.2 | Mus musculus RIKEN cDNA 3110001D03 gene (3110001D03Rik), mRNA.                                           |
| scl50221.17.1   | 145-S | 25.0231 | 1.42  | Pdpk1         | NM_011062.1 | Mus musculus 3-phosphoinositide dependent protein kinase-1 (Pdpk1), mRNA.                                |
| scl0319182.1    | 4-S   | 25.0038 | 2.23  | Hist1h2bh     | NM_178197.1 | Mus musculus histone 1, H2bh (Hist1h2bh), mRNA.                                                          |
| scl23461.27     | 162-S | 24.9766 | 1.5   | Kcnab2        | NM_010598.2 | Mus musculus potassium voltage-gated channel, shaker-related subfamily, beta member 2 (Kcnab2), mRNA.    |
| scl068735.6     | 63-S  | 24.9754 | 1.32  | Mrps18c       | XM_194230.3 |                                                                                                          |
| scl0019055.2    | 130-S | 24.9327 | 1.34  | Ppp3ca        | NM_008913.1 | Mus musculus protein phosphatase 3, catalytic subunit, alpha isoform (Ppp3ca), mRNA.                     |
| scl0066704.2    | 280-S | 24.9247 | 1.77  | 4921506I22Rik | NM_025717.2 | Mus musculus RIKEN cDNA 4921506I22 gene (4921506I22Rik), mRNA.                                           |
| scl0217039.1    | 54-S  | 24.909  | 1.29  | Ggnbp2        | NM_153144.1 |                                                                                                          |
| scl42993.1.28   | 269-S | 24.881  | 1.36  | 2410016O06Rik | NM_023633   | Mus musculus RIKEN cDNA 2410016O06 gene (2410016O06Rik), mRNA.                                           |
| scl41169.1      | 6-S   | 24.8772 | 1.98  | Cdk5r1        | NM_009871.2 |                                                                                                          |
| scl0068796.2    | 313-S | 24.8722 | 1.59  | 1110039B18Rik | NM_144525.2 | Mus musculus RIKEN cDNA 1110039B18 gene (1110039B18Rik), mRNA.                                           |
| scl0018728.1    | 38-S  | 24.8535 | 1.96  | Pira5         |             |                                                                                                          |
| scl0234385.1    | 330-S | 24.8299 | 1.47  | Mast3         | NM_199308.1 |                                                                                                          |
| scl20945.14     | 483-S | 24.7958 | 1.41  | Epc2          | NM_172663.2 |                                                                                                          |
| scl002340.1     | 98-S  | 24.7938 | 1.83  | Nin           | NM_008697   | Mus musculus ninein (Nin), mRNA.                                                                         |
| scl39226.2.178  | 25-S  | 24.7925 | 6.12  | 1110012N22Rik | XM_126634.3 | Mus musculus RIKEN cDNA 1110012N22 gene (1110012N22Rik), mRNA.                                           |
| scl50807.7.1    | 59-S  | 24.7832 | 1.62  | Dom3z         | NM_033613.1 | Mus musculus DOM-3 homolog Z (C. elegans) (Dom3z), mRNA.                                                 |
| scl070302.4     | 170-S | 24.7529 | 1.93  | 3110050K21Rik | XM_127780.4 | Mus musculus RIKEN cDNA 3110050K21 gene (3110050K21Rik), mRNA.                                           |
| scl29775.9      | 427-S | 24.7191 | 1.79  | Gata2         | NM_008090.3 | Mus musculus GATA binding protein 2 (Gata2), mRNA.                                                       |
| scl0099650.1    | 60-S  | 24.7172 | 1.66  | 4933434E20Rik | NM_025762.1 | Mus musculus RIKEN cDNA 4933434E20 gene (4933434E20Rik), mRNA.                                           |
| scl00214084.2   | 303-S | 24.7118 | 4.48  | Slc18a2       | NM_172523.1 | Mus musculus solute carrier family 18 (vesicular monoamine), member 2 (Slc18a2), mRNA.                   |
| scl39478.12     | 629-S | 24.7036 | 1.91  | Plekhm1       | NM_183034.1 | Mus musculus pleckstrin homology domain containing, family M (with RUN domain) member 1 (Plekhm1), mRNA. |
| scl27123.13.129 | 18-S  | 24.6818 | 1.79  | Dtx2          | NM_023742.1 | Mus musculus dxtex 2 homolog (Drosophila) (Dtx2), mRNA.                                                  |
| scl015122.2     | 7-S   | 24.6435 | 2.42  | Hba-a1        | NM_008218.1 | Mus musculus hemoglobin alpha, adult chain 1 (Hba-a1), mRNA.                                             |
| scl47694.7      | 354-S | 24.6344 | 2.06  | 2310042L06Rik | NM_172428.1 | Mus musculus RIKEN cDNA 2310042L06 gene (2310042L06Rik), mRNA.                                           |
| scl40178.5      | 602-S | 24.6289 | 1.77  | Zfp39         | NM_011758.1 | Mus musculus zinc finger protein 39 (Zfp39), mRNA.                                                       |
| scl0230789.1    | 243-S | 24.5818 | 1.44  | BC008163      | NM_145553.1 | Mus musculus cDNA sequence BC008163 (BC008163), mRNA.                                                    |
| scl066193.1     | 138-S | 24.5732 | 1.45  | 1110049F12Rik | NM_025411.2 | Mus musculus RIKEN cDNA 1110049F12 gene (1110049F12Rik), mRNA.                                           |
| scl43280.11     | 443-S | 24.5716 | 1.47  | Ankmy2        | NM_146033.2 |                                                                                                          |
| scl31056.12.1   | 57-S  | 24.5606 | 1.33  | Eed           | NM_021876.1 | Mus musculus embryonic ectoderm development (Eed), mRNA.                                                 |
| scl0226594.1    | 266-S | 24.5283 | 1.37  | BC025872      | NM_178593.2 | Mus musculus cDNA sequence BC025872 (BC025872), mRNA.                                                    |
| scl0319156.1    | 0-S   | 24.5273 | 3.17  | Hist1h4d      | NM_175654.1 | Mus musculus histone 1, H4d (Hist1h4d), mRNA.                                                            |
| scl37604.17     | 345-S | 24.5215 | 1.46  | Nedd1         | NM_008682   | Mus musculus neural precursor cell expressed, developmentally down-regulated gene 1 (Nedd1), mRNA.       |
| scl016822.21    | 5-S   | 24.4608 | 1.32  | Lcp2          | NM_010696.2 | Mus musculus lymphocyte cytosolic protein 2 (Lcp2), mRNA.                                                |
| scl0104303.6    | 291-S | 24.4573 | 1.62  | Ar11          | NM_025859.1 | Mus musculus ADP-ribosylation factor-like 1 (Ar11), mRNA.                                                |
| scl17984.2      | 572-S | 24.4482 | 1.47  | Sdpr          | NM_138741.1 | Mus musculus serum deprivation response (Sdpr), mRNA.                                                    |
| scl43007.18.1   | 29-S  | 24.4334 | 11.27 | Rgs6          | NM_015812.1 | Mus musculus regulator of G-protein signaling 6 (Rgs6), mRNA.                                            |
| scl29584.3      | 468-S | 24.4323 | 1.5   | Zfp637        | NM_177684.2 |                                                                                                          |
| scl40726.5      | 15-S  | 24.4119 | 1.42  | Kctd2         | NM_183285.1 | Mus musculus potassium channel tetramerisation domain containing 2 (Kctd2), mRNA.                        |
| scl40616.11     | 683-S | 24.407  | 1.63  | 4430402O11Rik | NM_026272.2 | Mus musculus RIKEN cDNA 4430402O11 gene (4430402O11Rik), mRNA.                                           |
| scl30692.5.1    | 111-S | 24.4029 | 1.85  | Lat           | NM_010689.2 | Mus musculus linker for activation of T cells (Lat), mRNA.                                               |
| scl0014560.2    | 59-S  | 24.3797 | 1.52  | Gdf10         | NM_145741.2 | Mus musculus growth differentiation factor 10 (Gdf10), mRNA.                                             |
| scl0231123.1    | 28-S  | 24.3669 | 1.52  | BC023882      | NM_146159.1 | Mus musculus cDNA sequence BC023882 (BC023882), mRNA.                                                    |



|                      |         |       |               |             |                                                                                                  |
|----------------------|---------|-------|---------------|-------------|--------------------------------------------------------------------------------------------------|
| sci00233545.1 305-S  | 24.3647 | 1.57  | 2210018M11Rik |             | Mus musculus RIKEN cDNA 2210018M11 gene (2210018M11Rik), mRNA.                                   |
| sci012740.2 183-S    | 24.3544 | 9.93  | Cldn4         | NM_009903.1 | Mus musculus claudin 4 (Cldn4), mRNA.                                                            |
| sci39906.6 377-S     | 24.3529 | 1.68  | AI851076      | XM_110955.2 | Mus musculus expressed sequence AI851076 (AI851076), mRNA.                                       |
| sci37199.27.1 42-S   | 24.3501 | 1.63  | E130103117Rik | NM_181316.3 | Mus musculus RIKEN cDNA E130103117 gene (E130103117Rik), mRNA.                                   |
| sci0022123.1 274-S   | 24.3274 | 1.29  | Psm3          | NM_009439.1 | Mus musculus proteasome (prosome, macropain) 26S subunit, non-ATPase, 3 (Psm3), mRNA.            |
| sci18413.5.1 0-S     | 24.3062 | 1.86  | 9430008C03Rik | XM_149251.3 | Mus musculus RIKEN cDNA 9430008C03 gene (9430008C03Rik), mRNA.                                   |
| sci0001695.1 1621-S  | 24.2993 | 1.31  | Ppm1b         | NM_011151.1 | Mus musculus protein phosphatase 1B, magnesium dependent, beta isoform (Ppm1b), mRNA.            |
| sci34177.5 600-S     | 24.2826 | 1.44  | 2310022B05Rik | NM_175149.3 | Mus musculus RIKEN cDNA 2310022B05 gene (2310022B05Rik), mRNA.                                   |
| sci069035.1 26-S     | 24.2798 | 2.29  | Zdhc3         | NM_026917.4 | Mus musculus zinc finger, DHHC domain containing 3 (Zdhc3), mRNA.                                |
| sci45540.5.1 3-S     | 24.2308 | 1.45  | 1500005A01Rik | NM_033146.1 | Mus musculus RIKEN cDNA 1500005A01 gene (1500005A01Rik), mRNA.                                   |
| sci00108907.2 230-S  | 24.2167 | 1.37  | Nusap1        | NM_133851.1 | Mus musculus nucleolar and spindle associated protein 1 (Nusap1), mRNA.                          |
| IGKC_V00807_lg_kappa | 24.1688 | 2.16  | Igk-C         | XM_132633.4 |                                                                                                  |
| sci15828.17 286-S    | 24.1531 | 1.34  | Lbr           | NM_133815.1 | Mus musculus lamin B receptor (Lbr), mRNA.                                                       |
| sci00214572.1 279-S  | 24.1124 | 1.36  | BC006705      | NM_145404.1 | Mus musculus cDNA sequence BC006705 (BC006705), mRNA.                                            |
| sci067912.2 23-S     | 24.0935 | 1.53  | 1600012H06Rik | NM_026451.1 | Mus musculus RIKEN cDNA 1600012H06 gene (1600012H06Rik), mRNA.                                   |
| sci00227743.1 265-S  | 24.0531 | 1.43  | Mapkap1       | NM_177345.2 | Mus musculus mitogen-activated protein kinase associated protein 1 (Mapkap1), mRNA.              |
| sci026901.3 41-S     | 24.0283 | 1.61  | Deb1          | NM_026794.2 | Mus musculus differentially expressed in B16F10 1 (Deb1), mRNA.                                  |
| sci0056417.2 229-S   | 24.0186 | 1.56  | Adar          | NM_019655.2 | Mus musculus adenosine deaminase, RNA-specific (Adar), mRNA.                                     |
| sci0100986.1 13-S    | 23.9969 | 2.27  | Akap9         | NM_194462.1 | Mus musculus A kinase (PRKA) anchor protein (yotiao) 9 (Akap9), mRNA.                            |
| sci0020481.2 24-S    | 23.9885 | 5.44  | Ski           | NM_011385.1 | Mus musculus Sloan-Kettering viral oncogene homolog (Ski), mRNA.                                 |
| sci41127.15.1 23-S   | 23.9577 | 1.52  | Ddx52         | NM_030096.1 | Mus musculus DEAD (Asp-Glu-Ala-Asp) box polypeptide 52 (Ddx52), mRNA.                            |
| sci0012874.1 259-S   | 23.9469 | 2.16  | Cpd           | NM_007754.1 | Mus musculus carboxypeptidase D (Cpd), mRNA.                                                     |
| sci0003218.1 27-S    | 23.9009 | 8.38  | Ass1          | NM_007494.2 | Mus musculus argininosuccinate synthetase 1 (Ass1), mRNA.                                        |
| sci33121.3 245-S     | 23.8771 | 2.08  | Zfp524        | NM_025324.1 |                                                                                                  |
| sci22876.3 595-S     | 23.87   | 1.37  | Mcl1          | NM_008562.2 | Mus musculus myeloid cell leukemia sequence 1 (Mcl1), mRNA.                                      |
| sci21684.2.5 0-S     | 23.8665 | 1.36  | Rbm15         | XM_131139.4 |                                                                                                  |
| sci0024061.1 292-S   | 23.8604 | 1.29  | Smc11         | NM_019710.1 | Mus musculus SMC (structural maintenance of chromosomes 1)-like 1 (S. cerevisiae) (Smc11), mRNA. |
| sci0230796.1 23-S    | 23.8387 | 3.37  | Wdct1         | NM_199306.1 |                                                                                                  |
| sci16594.5 443-S     | 23.8253 | 1.58  | D1Bwg1363e    | XM_129886.4 | Mus musculus DNA segment, Chr 1, Brigham & Womens Genetics 1363 expressed (D1Bwg1363e), mRNA.    |
| sci0012192.2 207-S   | 23.822  | 1.43  | Zfp361i       | NM_007564.2 | Mus musculus zinc finger protein 36, C3H type-like 1 (Zfp361i), mRNA.                            |
| sci0227570.7 253-S   | 23.8052 | 1.54  | 2810455F06Rik | XM_130011.5 | Mus musculus RIKEN cDNA 2810455F06 gene (2810455F06Rik), mRNA.                                   |
| sci0022329.2 144-S   | 23.7655 | 1.56  | Vcam1         | NM_011693.2 | Mus musculus vascular cell adhesion molecule 1 (Vcam1), mRNA.                                    |
| sci50668.1.78 47-S   | 23.748  | 1.31  | Tbcc          | NM_178385.2 | Mus musculus tubulin-specific chaperone c (Tbcc), mRNA.                                          |
| sci23529.21 298-S    | 23.7365 | 2.17  | Plod1         | NM_011122.1 | Mus musculus procollagen-lysine, 2-oxoglutarate 5-dioxygenase 1 (Plod1), mRNA.                   |
| sci0319180.1 4-S     | 23.7137 | 2.11  | Hist1h2bf     | NM_178195.1 | Mus musculus histone 1, H2bf (Hist1h2bf), mRNA.                                                  |
| sci19617.10 166-S    | 23.7122 | 1.47  | Pip5k2a       | NM_008845.2 | Mus musculus phosphatidylinositol-4-phosphate 5-kinase, type II, alpha (Pip5k2a), mRNA.          |
| sci00319262.1 205-S  | 23.6903 | 2.5   | Fchsd1        | NM_175684.3 | Mus musculus FCH and double SH3 domains 1 (Fchsd1), mRNA.                                        |
| sci0016923.1 194-S   | 23.6743 | 1.65  | Lnk           | NM_008507.2 | Mus musculus linker of T-cell receptor pathways (Lnk), mRNA.                                     |
| sci016453.30 17-S    | 23.6642 | 1.55  | Jak3          | NM_010589   | Mus musculus Janus kinase 3 (Jak3), mRNA.                                                        |
| sci026874.2 21-S     | 23.6277 | 7.29  | Abcd2         | NM_011994.1 | Mus musculus ATP-binding cassette, sub-family D (ALD), member 2 (Abcd2), mRNA.                   |
| sci068052.3 30-S     | 23.627  | 1.38  | Rps13         | NM_026533   | Mus musculus ribosomal protein S13 (Rps13), mRNA.                                                |
| sci0001934.1 38-S    | 23.6135 | 1.3   | Lmna          | NM_019390.1 | Mus musculus lamin A (Lmna), mRNA.                                                               |
| sci44991.2.1 21-S    | 23.6112 | 1.54  | Hist1h2bc     | NM_023422   | Mus musculus histone 1, H2bc (Hist1h2bc), mRNA.                                                  |
| sci41638.9.1 29-S    | 23.6005 | 1.55  | Timd4         | NM_178759.3 |                                                                                                  |
| sci074270.26 30-S    | 23.5741 | 1.65  | Usp20         | NM_028846.1 | Mus musculus ubiquitin specific protease 20 (Usp20), mRNA.                                       |
| sci0002692.1 59-S    | 23.4832 | 1.59  | Galt          | NM_016658.1 | Mus musculus galactose-1-phosphate uridylyl transferase (Galt), mRNA.                            |
| sci0070990.1 251-S   | 23.4799 | 1.46  | 4931431L11Rik | XM_485553   |                                                                                                  |
| sci23684.11 537-S    | 23.4454 | 1.54  | Sepr1         | NM_029100.1 | Mus musculus selenoprotein N, 1 (Sepr1), mRNA.                                                   |
| sci0003840.1 14-S    | 23.4279 | 10.18 | Ppp1r14c      | NM_133485.1 | Mus musculus protein phosphatase 1, regulatory (inhibitor) subunit 14c (Ppp1r14c), mRNA.         |
| sci45363.6 489-S     | 23.4279 | 1.47  | 6330407G04Rik | NM_134078.2 | Mus musculus RIKEN cDNA 6330407G04 gene (6330407G04Rik), mRNA.                                   |
| sci0016997.2 276-S   | 23.4221 | 1.95  | Ltbp2         | NM_013589.1 | Mus musculus latent transforming growth factor beta binding protein 2 (Ltbp2), mRNA.             |
| sci0192191.2 33-S    | 23.4046 | 1.95  | BC019367      | NM_138675.2 | Mus musculus cDNA sequence BC019367 (BC019367), mRNA.                                            |
| sci38150.2.1 277-S   | 23.3882 | 2.3   | Slc35d3       | XM_125515.3 |                                                                                                  |
| sci38416.13.1 1-S    | 23.3878 | 2.15  | Ptprb         | NM_029928.1 | Mus musculus protein tyrosine phosphatase, receptor type, B (Ptprb), mRNA.                       |
| sci21104.8 445-S     | 23.3763 | 2.5   | 2900073H19Rik | NM_026615.2 | Mus musculus RIKEN cDNA 2900073H19 gene (2900073H19Rik), mRNA.                                   |
| sci000098.1 12-S     | 23.3632 | 1.45  | 0610007P22Rik | NM_026676.1 | Mus musculus RIKEN cDNA 0610007P22 gene (0610007P22Rik), mRNA.                                   |

|                     |         |       |               |             |                                                                                                                             |
|---------------------|---------|-------|---------------|-------------|-----------------------------------------------------------------------------------------------------------------------------|
| scl24913.11 38-S    | 23.3363 | 1.3   | 1110063F24Rik | NM 133889.2 | Mus musculus RIKEN cDNA 1110063F24 gene (1110063F24Rik), mRNA.                                                              |
| scl28518.8.1 30-S   | 23.3302 | 1.98  | Mbd4          | NM 010774.1 | Mus musculus methyl-CpG binding domain protein 4 (Mbd4), mRNA.                                                              |
| scl0319188.1 136-S  | 23.2931 | 1.7   | Hist1h2bp     | NM 178202   | Mus musculus histone 1, H2bp (Hist1h2bp), mRNA.                                                                             |
| scl30833.27 114-S   | 23.2871 | 1.3   | St5           | NM 029811.1 | Mus musculus suppression of tumorigenicity 5 (St5), mRNA.                                                                   |
| scl0109168.12 22-S  | 23.2767 | 2.66  | 5730596K20Rik | NM 146091.2 | Mus musculus RIKEN cDNA 5730596K20 gene (5730596K20Rik), mRNA.                                                              |
| scl41425.8 289-S    | 23.241  | 2.97  | Zfp535        | NM 026107.2 | Mus musculus zinc finger protein 535 (Zfp535), mRNA.                                                                        |
| scl0014082.2 318-S  | 23.2325 | 1.78  | Fadd          | NM 010175.2 | Mus musculus Fas (TNFRSF6)-associated via death domain (Fadd), mRNA.                                                        |
| scl0069386.2 29-S   | 23.2182 | 2.66  | Hist1h4h      | NM 153173.1 | Mus musculus histone 1, H4h (Hist1h4h), mRNA.                                                                               |
| scl077897.11 26-S   | 23.1873 | 5.54  | Cep1          | NM 030000.1 | Mus musculus centrosomal protein 1 (Cep1), mRNA.                                                                            |
| scl0003280.1 90-S   | 23.1842 | 7.07  | C330016H24Rik | NM 030155.1 | Mus musculus RIKEN cDNA C330016H24 gene (C330016H24Rik), mRNA.                                                              |
| scl34329.24.1 1-S   | 23.1684 | 2.64  | Fuk           | NM 172283.2 | Mus musculus fucokinase (Fuk), transcript variant 1, mRNA.                                                                  |
| scl31502.9 323-S    | 23.1672 | 1.48  | Fxyd5         | NM 008761.2 | Mus musculus FXYD domain-containing ion transport regulator 5 (Fxyd5), mRNA.                                                |
| scl0011569.2 215-S  | 23.1229 | 6.94  | Aebp2         | NM 009637.1 | Mus musculus AE binding protein 2 (Aebp2), mRNA.                                                                            |
| scl0066365.1 89-S   | 23.1132 | 1.43  | 2310015N07Rik | NM 025515.1 | Mus musculus RIKEN cDNA 2310015N07 gene (2310015N07Rik), mRNA.                                                              |
| scl0109032.3 2-S    | 23.1056 | 2.17  | 5830484A20Rik | XM 284155.2 | Mus musculus RIKEN cDNA 5830484A20 gene (5830484A20Rik), mRNA.                                                              |
| scl066292.2 43-S    | 23.1038 | 1.35  | Mrps21        | NM 078479.2 | Mus musculus mitochondrial ribosomal protein S21 (Mrps21), mRNA.                                                            |
| scl41017.13 82-S    | 23.0943 | 1.35  | Ppp19b        | NM 172261.1 | Mus musculus protein phosphatase 1, regulatory subunit 9B (Ppp19b), mRNA.                                                   |
| scl0003447.1 0-S    | 23.0918 | 2.8   | Rbm5          | NM 148930.2 | Mus musculus RNA binding motif protein 5 (Rbm5), mRNA.                                                                      |
| scl059050.2 22-S    | 23.0338 | 1.31  | 5730427N09Rik | NM 021552.1 | Mus musculus RIKEN cDNA 5730427N09 gene (5730427N09Rik), mRNA.                                                              |
| scl0023808.2 287-S  | 23.0305 | 1.38  | Ash2l         | NM 011791.1 | Mus musculus ash2 (absent, small, or homeotic)-like (Drosophila) (Ash2l), mRNA.                                             |
| scl45283.8.141 93-S | 22.9831 | 1.62  | 9030625A04Rik | NM 172488.1 | Mus musculus RIKEN cDNA 9030625A04 gene (9030625A04Rik), mRNA.                                                              |
| scl35713.2.1 23-S   | 22.9441 | 1.62  | 2300009A05Rik | XM 204313.2 | Mus musculus RIKEN cDNA 2300009A05 gene (2300009A05Rik), mRNA.                                                              |
| scl19453.6.2634 3-S | 22.9148 | 1.51  | A130092J06Rik | NM 175511.2 | Mus musculus RIKEN cDNA A130092J06 gene (A130092J06Rik), mRNA.                                                              |
| scl23928.4.1 17-S   | 22.8889 | 1.58  | Dph2l2        | NM 026344.2 | Mus musculus diptheria toxin resistance protein required for dipthamide biosynthesis (Saccharomyces)-like 2 (Dph2l2), mRNA. |
| scl19566.6.1 18-S   | 22.8797 | 1.83  | Dpp7          | NM 031843.2 | Mus musculus dipeptidylpeptidase 7 (Dpp7), mRNA.                                                                            |
| scl18197.5 22-S     | 22.8676 | 1.32  | Rgs19         | NM 026446.2 | Mus musculus regulator of G-protein signaling 19 (Rgs19), mRNA.                                                             |
| scl36336.8 440-S    | 22.8663 | 1.73  | Rpl14         | NM 025974.1 | Mus musculus ribosomal protein L14 (Rpl14), mRNA.                                                                           |
| scl44126.11.1 57-S  | 22.801  | 1.97  | Gmds          | NM 146041.1 | Mus musculus GDP-mannose 4, 6-dehydratase (Gmds), mRNA.                                                                     |
| scl022666.6 141-S   | 22.7584 | 1.37  | Zfp161        | NM 009547.2 | Mus musculus zinc finger protein 161 (Zfp161), mRNA.                                                                        |
| scl51993.3 190-S    | 22.7384 | 1.39  | Eif1a         | NM 010120.3 | Mus musculus eukaryotic translation initiation factor 1A (Eif1a), mRNA.                                                     |
| scl17152.12 234-S   | 22.723  | 1.76  | 9630058J23Rik | NM 146105.3 | Mus musculus RIKEN cDNA 9630058J23 gene (9630058J23Rik), mRNA.                                                              |
| scl30187.2.1 182-S  | 22.702  | 1.34  | 1110001J03Rik | NM 025363.2 | Mus musculus RIKEN cDNA 1110001J03 gene (1110001J03Rik), mRNA.                                                              |
| scl023994.4 204-S   | 22.6769 | 1.25  | Dazap2        | NM 011873.2 | Mus musculus DAZ associated protein 2 (Dazap2), mRNA.                                                                       |
| scl43551.17 116-S   | 22.648  | 1.82  | Nln           | NM 029447.1 | Mus musculus neurolysin (metallopeptidase M3 family) (Nln), mRNA.                                                           |
| scl47441.30 193-S   | 22.6255 | 1.35  | Hemp1         | NM 153505.2 |                                                                                                                             |
| scl069146.11 118-S  | 22.5675 | 1.72  | Gsdmdc1       | NM 026960.1 |                                                                                                                             |
| scl29977.11.1 22-S  | 22.5585 | 2.69  | Mmrr1         | XM 284198.2 |                                                                                                                             |
| scl0066432.1 29-S   | 22.5576 | 1.63  | 2010007L18Rik | XM 134478.2 | Mus musculus RIKEN cDNA 2010007L18 gene (2010007L18Rik), mRNA.                                                              |
| scl012765.6 0-S     | 22.5509 | 1.74  | Il8rb         | NM 009909.2 | Mus musculus interleukin 8 receptor, beta (Il8rb), mRNA.                                                                    |
| scl020848.1 5-S     | 22.5324 | 1.59  | Stat3         | NM 011486.2 | Mus musculus signal transducer and activator of transcription 3 (Stat3), mRNA.                                              |
| scl070221.8 1-S     | 22.5036 | 3.2   | 2600011C06Rik | NM 027349.1 | Mus musculus RIKEN cDNA 2600011C06 gene (2600011C06Rik), mRNA.                                                              |
| scl066158.1 320-S   | 22.4925 | 1.44  | 1110012O05Rik | NM 024170   | Mus musculus RIKEN cDNA 1110012O05 gene (1110012O05Rik), mRNA.                                                              |
| scl00269682.2 253-S | 22.4897 | 1.65  | Golga3        | NM 008146.3 | Mus musculus golgi autoantigen, golgin subfamily a. 3 (Golga3), mRNA.                                                       |
| scl0192976.1 323-S  | 22.4811 | 1.74  | BC046404      | NM 198861.1 | Mus musculus cDNA sequence BC046404 (BC046404), mRNA.                                                                       |
| scl00209630.2 217-S | 22.4601 | 1.35  | Frdm4a        | NM 172475.2 |                                                                                                                             |
| scl018817.10 297-S  | 22.4346 | 1.54  | Plk1          | NM 011121.2 | Mus musculus polo-like kinase 1 (Drosophila) (Plk1), mRNA.                                                                  |
| scl39338.3 4-S      | 22.4086 | 1.28  | Ni5c          | NM 015807.1 | Mus musculus 5,3-nucleotidase, cytosolic (Ni5c), mRNA.                                                                      |
| scl0052040.1 253-S  | 22.385  | 1.29  | Ppp1r10       | NM 175934.2 | Mus musculus protein phosphatase 1, regulatory subunit 10 (Ppp1r10), mRNA.                                                  |
| scl43508.21.1 5-S   | 22.3835 | 1.68  | Map3k1        | NM 011945.1 | Mus musculus mitogen activated protein kinase kinase kinase 1 (Map3k1), mRNA.                                               |
| scl52415.12 0-S     | 22.3574 | 1.29  | Ldb1          | NM 010697.1 | Mus musculus LIM domain binding 1 (Ldb1), mRNA.                                                                             |
| scl24033.7.1 11-S   | 22.3373 | 1.29  | Mrp137        | NM 025500.1 | Mus musculus mitochondrial ribosomal protein L37 (Mrp137), mRNA.                                                            |
| scl0076803.1 194-S  | 22.3312 | 11.73 | 2410141K09Rik | NM 183119   | Mus musculus RIKEN cDNA 2410141K09 gene (2410141K09Rik), mRNA.                                                              |
| scl31972.8 47-S     | 22.3012 | 1.83  | Bub3          | NM 009774.2 | Mus musculus budding uninhibited by benzimidazoles 3 homolog (S. cerevisiae) (Bub3), mRNA.                                  |
| scl074132.1 5-S     | 22.2993 | 1.41  | Rnf6          | NM 028774.1 |                                                                                                                             |
| scl0258666.1 1-S    | 22.2971 | 12.06 | OlfR822       | NM 146671.1 | Mus musculus olfactory receptor 822 (OlfR822), mRNA.                                                                        |
| scl20781.3.23 109-S | 22.297  | 2.04  | 1700011J10Rik | NM 183265   | Mus musculus RIKEN cDNA 1700011J10 gene (1700011J10Rik), mRNA.                                                              |

|               |       |         |       |               |             |                                                                                                                           |
|---------------|-------|---------|-------|---------------|-------------|---------------------------------------------------------------------------------------------------------------------------|
| sci0076281.1  | 330-S | 22.2937 | 1.32  | Tax1bp3       | NM_029564   |                                                                                                                           |
| sci30452.18   | 578-S | 22.2919 | 1.26  | Nap114        | NM_008672   | Mus musculus nucleosome assembly protein 1-like 4 (Nap114), mRNA.                                                         |
| sci16258.13.1 | 64-S  | 22.2842 | 1.35  | Rnpep         | NM_145417   | Mus musculus arginyl aminopeptidase (aminopeptidase B) (Rnpep), mRNA.                                                     |
| sci24658.9.1  | 90-S  | 22.2751 | 2.63  | Tnfrsf25      | NM_033042   | Mus musculus tumor necrosis factor receptor superfamily, member 25 (Tnfrsf25), mRNA.                                      |
| sci35535.28   | 151-S | 22.2616 | 1.64  | Ibtk          | XM_135030.4 |                                                                                                                           |
| sci30402.11.1 | 13-S  | 22.2279 | 1.52  | BC020002      | NM_145374.1 | Mus musculus cDNA sequence BC020002 (BC020002), mRNA.                                                                     |
| sci50802.2    | 363-S | 22.2209 | 1.92  | Bat9          | NM_198886.2 | Mus musculus HLA-B-associated transcript 9 (Bat9), mRNA.                                                                  |
| sci024135.1   | 208-S | 22.2023 | 1.55  | Zfp68         | NM_013844.1 | Mus musculus zinc finger protein 68 (Zfp68), mRNA.                                                                        |
| sci000724.1   | 245-S | 22.2009 | 4.43  | Calr3         | NM_029782.2 | Mus musculus calreticulin 3 (Calr3), mRNA.                                                                                |
| sci32679.14.1 | 2-S   | 22.1898 | 7.39  | Tulp2         | NM_008807.1 | Mus musculus tubby-like protein 2 (Tulp2), mRNA.                                                                          |
| sci38985.8    | 420-S | 22.1839 | 1.32  | Cd164         | NM_016898.1 | Mus musculus CD164 antigen (Cd164), mRNA.                                                                                 |
| sci078751.8   | 330-S | 22.1523 | 2.86  | Zc3hdc6       | NM_178404.2 |                                                                                                                           |
| sci0225912.8  | 241-S | 22.1421 | 1.49  | BC065078      | NM_201351.1 | Mus musculus cDNA sequence BC065078 (BC065078), mRNA.                                                                     |
| sci0016159.2  | 68-S  | 22.1348 | 2.96  | Il12a         | NM_008351.1 | Mus musculus interleukin 12a (Il12a), mRNA.                                                                               |
| sci34464.12   | 3-S   | 22.1316 | 1.69  | Dok4          | NM_053246.1 | Mus musculus downstream of tyrosine kinase 4 (Dok4), mRNA.                                                                |
| sci00103284.2 | 177-S | 22.1314 | 1.79  | Al790326      | NM_134003.1 | Mus musculus expressed sequence Al790326 (Al790326), mRNA.                                                                |
| sci17783.10   | 25-S  | 22.1308 | 1.31  | BC038286      | NM_170755.1 | Mus musculus cDNA sequence BC038286 (BC038286), mRNA.                                                                     |
| sci00320011.1 | 153-S | 22.1203 | 1.37  | Ugcg11        | NM_198899.1 |                                                                                                                           |
| sci0003659.1  | 24-S  | 22.1165 | 4.47  | Mef2c         | NM_025282.1 | Mus musculus myocyte enhancer factor 2C (Mef2c), mRNA.                                                                    |
| sci00116731.1 | 145-S | 22.1111 | 4.4   | Pcdha1        | NM_054072   | Mus musculus protocadherin alpha 1 (Pcdha1), mRNA.                                                                        |
| sci52839.2    | 29-S  | 22.1065 | 1.47  | Al837181      | NM_134149.1 | Mus musculus expressed sequence Al837181 (Al837181), mRNA.                                                                |
| sci0278279.1  | 174-S | 22.0455 | 11.27 | 8430438D04Rik | NM_177368.2 | Mus musculus RIKEN cDNA 8430438D04 gene (8430438D04Rik), mRNA.                                                            |
| sci0071702.2  | 200-S | 22.0443 | 1.27  | Cdc5l         | NM_152810.1 | Mus musculus cell division cycle 5-like (S. pombe) (Cdc5l), mRNA.                                                         |
| sci0020848.1  | 188-S | 22.0326 | 1.34  | Stat3         | NM_011486.2 | Mus musculus signal transducer and activator of transcription 3 (Stat3), mRNA.                                            |
| sci53499.1.4  | 164-S | 22.0276 | 4.68  | 1700020D05Rik | NM_023781.3 | Mus musculus RIKEN cDNA 1700020D05 gene (1700020D05Rik), mRNA.                                                            |
| sci0067382.2  | 271-S | 22.0155 | 1.33  | Brd3          | NM_023336.2 | Mus musculus bromodomain containing 3 (Brd3), mRNA.                                                                       |
| sci0011737.2  | 249-S | 22.0033 | 1.31  | Anp32a        | NM_009672.2 | Mus musculus acidic (leucine-rich) nuclear phosphoprotein 32 family, member A (Anp32a), mRNA.                             |
| sci0076367.2  | 3-S   | 22.002  | 7.96  | Trp53rk       | NM_023815.2 |                                                                                                                           |
| sci23193.10.1 | 8-S   | 21.9988 | 1.76  | Alg5          | NM_025442.1 | Mus musculus asparagine-linked glycosylation 5 homolog (yeast, dolichyl-phosphate beta-glucosyltransferase) (Alg5), mRNA. |
| sci056398.7   | 324-S | 21.9785 | 1.27  | 1500003O03Rik | NM_019769.2 | Mus musculus RIKEN cDNA 1500003O03 gene (1500003O03Rik), mRNA.                                                            |
| sci32648.17   | 169-S | 21.9339 | 1.28  | Gtf2h1        | NM_008186.2 | Mus musculus general transcription factor II H, polypeptide 1 (Gtf2h1), mRNA.                                             |
| sci0231225.1  | 255-S | 21.9335 | 1.28  | 4932414K18Rik | NM_173764   | Mus musculus RIKEN cDNA 4932414K18 gene (4932414K18Rik), mRNA.                                                            |
| sci067440.9   | 18-S  | 21.926  | 2.09  | Papd1         | NM_026157.1 | Mus musculus PAP associated domain containing 1 (Papd1), mRNA.                                                            |
| sci54662.1.1  | 35-S  | 21.9071 | 11.25 | 9330152L17    | NM_177917.2 | Mus musculus hypothetical protein 9330152L17 (9330152L17), mRNA.                                                          |
| sci54620.5    | 512-S | 21.9059 | 1.65  | Bhlhb9        | NM_198161.1 |                                                                                                                           |
| sci24988.17.1 | 42-S  | 21.9004 | 1.37  | Sf3a3         | NM_029157.2 | Mus musculus splicing factor 3a, subunit 3 (Sf3a3), mRNA.                                                                 |
| sci0214505.1  | 41-S  | 21.8958 | 1.67  | AU067744      | NM_172529.1 | Mus musculus expressed sequence AU067744 (AU067744), mRNA.                                                                |
| sci32299.7.1  | 25-S  | 21.8949 | 1.43  | Stard10       | NM_019990.1 | Mus musculus START domain containing 10 (Stard10), mRNA.                                                                  |
| sci33668.2    | 157-S | 21.8853 | 1.86  | F2r3          | NM_007975.2 | Mus musculus coagulation factor II (thrombin) receptor-like 3 (F2r3), mRNA.                                               |
| sci071562.11  | 5-S   | 21.8739 | 1.65  | Afmid         | NM_027827.2 | Mus musculus arylformamidase (Afmid), mRNA.                                                                               |
| sci37927.8.1  | 330-S | 21.85   | 1.68  | Slc29a3       | NM_023596.2 | Mus musculus solute carrier family 29 (nucleoside transporters), member 3 (Slc29a3), mRNA.                                |
| sci53116.10   | 62-S  | 21.831  | 1.45  | Pi4k2a        | NM_145501.1 | Mus musculus phosphatidylinositol 4-kinase type 2 alpha (Pi4k2a), mRNA.                                                   |
| sci0107734.5  | 7-S   | 21.8057 | 1.34  | Mrp130        | NM_027098.1 | Mus musculus mitochondrial ribosomal protein L30 (Mrp130), mRNA.                                                          |
| sci0067665.1  | 200-S | 21.7918 | 1.33  | Dctn4         | NM_026302.2 | Mus musculus dynactin 4 (Dctn4), mRNA.                                                                                    |
| sci0066610.1  | 317-S | 21.7889 | 1.69  | Abi3          | NM_025659.1 | Mus musculus ABI gene family, member 3 (Abi3), mRNA.                                                                      |
| sci0030955.2  | 290-S | 21.7888 | 1.52  | Pik3cg        | NM_020272.1 | Mus musculus phosphoinositide-3-kinase, catalytic, gamma polypeptide (Pik3cg), mRNA.                                      |
| sci38655.14   | 451-S | 21.7879 | 1.56  | Pip5k1c       | XM_150337.1 | Mus musculus phosphatidylinositol-4-phosphate 5-kinase, type 1 gamma (Pip5k1c), mRNA.                                     |
| sci29212.6    | 52-S  | 21.7767 | 6.49  | Opn1sw        | NM_007538.2 | Mus musculus opsin 1 (cone pigments), short-wave-sensitive (color blindness, tritan) (Opn1sw), mRNA.                      |
| sci0026908.1  | 233-S | 21.7635 | 1.53  | Eif2s3y       | NM_012011.1 | Mus musculus eukaryotic translation initiation factor 2, subunit 3, structural gene Y-linked (Eif2s3y), mRNA.             |
| sci37399.12   | 263-S | 21.7501 | 1.89  | 4632413K17Rik | NM_177614.2 | Mus musculus RIKEN cDNA 4632413K17 gene (4632413K17Rik), mRNA.                                                            |
| sci21992.22   | 340-S | 21.7265 | 4.29  | 3110045G13Rik | NM_028460.1 | Mus musculus RIKEN cDNA 3110045G13 gene (3110045G13Rik), mRNA.                                                            |
| sci20314.23.1 | 217-S | 21.7159 | 6.86  | Acx1          | NM_028765.1 |                                                                                                                           |
| sci0003632.1  | 1-S   | 21.7135 | 10.45 | Cast          | NM_009817.1 | Mus musculus calpastatin (Cast), mRNA.                                                                                    |
| sci18854.8.1  | 1-S   | 21.7018 | 3.86  | Actc1         | NM_009608.1 | Mus musculus actin, alpha, cardiac (Actc1), mRNA.                                                                         |
| sci018521.14  | 30-S  | 21.685  | 1.27  | Pcbp2         | NM_011042.1 | Mus musculus poly(rC) binding protein 2 (Pcbp2), mRNA.                                                                    |
| sci25461.9    | 196-S | 21.6839 | 1.4   | Nans          | NM_053179.2 | Mus musculus N-acetylneuraminic acid synthase (sialic acid synthase) (Nans), mRNA.                                        |

|                     |         |       |               |             |                                                                                                                            |
|---------------------|---------|-------|---------------|-------------|----------------------------------------------------------------------------------------------------------------------------|
| scl00319192.1 1-S   | 21.6771 | 2.15  | Hist2h2aa2    | NM 178212   | Mus musculus histone 2, H2aa2 (Hist2h2aa2), mRNA.                                                                          |
| scl31513.2.1 158-S  | 21.6226 | 6.96  | 4930479M11Rik | NM 183108.1 | Mus musculus RIKEN cDNA 4930479M11 gene (4930479M11Rik), mRNA.                                                             |
| scl16472.29.1 1-S   | 21.6228 | 3.1   | 4932408F19Rik | NM 207225.1 | Mus musculus RIKEN cDNA 4932408F19 gene (4932408F19Rik), mRNA.                                                             |
| scl0002403.1 56-S   | 21.6221 | 2.56  | Sdcccag1      | NM 181665.1 | Mus musculus serologically defined colon cancer antigen 1 (Sdcccag1), transcript variant 1, mRNA.                          |
| scl35797.7.1 123-S  | 21.5911 | 1.3   | Commd4        | NM 025417.1 | Mus musculus COMM domain containing 4 (Commd4), mRNA.                                                                      |
| scl29407.39.1 52-S  | 21.5596 | 8.4   | Pik3c2g       | NM 011084   | Mus musculus phosphatidylinositol 3-kinase, C2 domain containing, gamma polypeptide (Pik3c2g), transcript variant 2, mRNA. |
| scl36433.10 466-S   | 21.5579 | 3.16  | 2610002117Rik | XM 135177.4 | Mus musculus RIKEN cDNA 2610002117 gene (2610002117Rik), mRNA.                                                             |
| scl52628.17.1 63-S  | 21.544  | 1.7   | BC018472      | NM 146097.1 | Mus musculus cDNA sequence BC018472 (BC018472), mRNA.                                                                      |
| scl0210148.13 0-S   | 21.5427 | 1.61  | Slc30a6       | NM 144798.2 | Mus musculus solute carrier family 30 (zinc transporter), member 6 (Slc30a6), mRNA.                                        |
| scl33707.42 67-S    | 21.5313 | 1.7   | Myo9b         | NM 015742.1 | Mus musculus myosin IXb (Myo9b), mRNA.                                                                                     |
| scl0235493.12 117-S | 21.5302 | 1.55  | BC031353      | NM 153584.1 | Mus musculus cDNA sequence BC031353 (BC031353), mRNA.                                                                      |
| scl26719.6 100-S    | 21.5144 | 1.68  | Spon2         | NM 133903.2 | Mus musculus spondin 2, extracellular matrix protein (Spon2), mRNA.                                                        |
| scl0223672.1 326-S  | 21.4935 | 11.1  | LOC223672     | XM 128064.4 | Mus musculus hypothetical protein LOC223672 (LOC223672), mRNA.                                                             |
| scl45393.10 71-S    | 21.4881 | 1.24  | Bnip3l        | NM 009761.2 | Mus musculus BCL2/adenovirus E1B 19kDa-interacting protein 3-like (Bnip3l), mRNA.                                          |
| scl0022379.1 143-S  | 21.4148 | 1.58  | Fmnl3         | NM 011711.1 | Mus musculus formin-like 3 (Fmnl3), mRNA.                                                                                  |
| scl23602.11 383-S   | 21.4007 | 1.32  | 1110005F07Rik | NM 025383   | Mus musculus RIKEN cDNA 1110005F07 gene (1110005F07Rik), mRNA.                                                             |
| scl026446.4 108-S   | 21.3916 | 1.27  | Psmb3         | NM 011971.2 | Mus musculus proteasome (prosome, macropain) subunit, beta type 3 (Psmb3), mRNA.                                           |
| scl55015.6.1 13-S   | 21.3849 | 2.28  | Timp1         | NM 011593   | Mus musculus tissue inhibitor of metalloproteinase 1 (Timp1), mRNA.                                                        |
| scl0018130.2 77-S   | 21.3789 | 1.34  | Ddx26         | NM 008715.1 | Mus musculus DEAD/H (Asp-Glu-Ala-Asp/His) box polypeptide 26 (Ddx26), mRNA.                                                |
| scl27382.16 83-S    | 21.3765 | 1.28  | 1100001D10Rik | XM 358359.1 | Mus musculus RIKEN cDNA 1100001D10 gene (1100001D10Rik), mRNA.                                                             |
| scl39788.24 563-S   | 21.3231 | 2.02  | Brip1         | NM 178309.1 | Mus musculus BRCA1 interacting protein C-terminal helicase 1 (Brip1), mRNA.                                                |
| scl030046.1 110-S   | 21.3004 | 1.77  | Zfp292        | NM 013889.1 | Mus musculus zinc finger protein 292 (Zfp292), mRNA.                                                                       |
| scl0272322.13 8-S   | 21.2887 | 8.26  | Arntl2        | NM 172309.1 | Mus musculus aryl hydrocarbon receptor nuclear translocator-like 2 (Arntl2), mRNA.                                         |
| scl52693.20 358-S   | 21.2811 | 1.58  | Tle4          | NM 011600.2 | Mus musculus transducin-like enhancer of split 4, homolog of Drosophila E(spl) (Tle4), mRNA.                               |
| scl0015587.1 282-S  | 21.2775 | 1.35  | Hyal2         | NM 010489.2 | Mus musculus hyaluronidase 2 (Hyal2), mRNA.                                                                                |
| scl000390.1 159-S   | 21.2669 | 6.77  | Mtrf1         | NM 145960   | Mus musculus mitochondrial translational release factor 1 (Mtrf1), mRNA.                                                   |
| scl27224.3.7 29-S   | 21.2583 | 1.55  | Arl6ip4       | NM 144509.1 | Mus musculus ADP-ribosylation factor-like 6 interacting protein 4 (Arl6ip4), mRNA.                                         |
| scl25570.5.1 79-S   | 21.2464 | 10.63 | Srrp          | NM 177774.2 | Mus musculus serine-arginine repressor protein (Srrp), mRNA.                                                               |
| scl076281.4 19-S    | 21.2223 | 1.32  | Tax1bp3       | NM 029564   |                                                                                                                            |
| scl19511.8 175-S    | 21.2186 | 1.68  | Slc2a6        | NM 172659.1 | Mus musculus solute carrier family 2 (facilitated glucose transporter), member 6 (Slc2a6), mRNA.                           |
| scl0014367.2 144-S  | 21.2143 | 6.53  | Fzd5          | NM 022721.1 | Mus musculus frizzled homolog 5 (Drosophila) (Fzd5), mRNA.                                                                 |
| scl33219.11.1 14-S  | 21.2085 | 3.42  | BC021611      | NM 144932.2 | Mus musculus cDNA sequence BC021611 (BC021611), mRNA.                                                                      |
| scl33241.10 186-S   | 21.1727 | 1.33  | Icsbp1        | NM 008320.2 | Mus musculus interferon consensus sequence binding protein 1 (Icsbp1), mRNA.                                               |
| scl30691.10.4 70-S  | 21.1589 | 1.61  | 2210013K02Rik | NM 023712   | Mus musculus RIKEN cDNA 2210013K02 gene (2210013K02Rik), mRNA.                                                             |
| scl056444.13 2-S    | 21.1311 | 1.29  | Actr10        | NM 019785.1 | Mus musculus ARP10 actin-related protein 10 homolog (S. cerevisiae) (Actr10), mRNA.                                        |
| scl0020947.1 79-S   | 21.1267 | 1.45  | Swap70        | NM 009302.2 | Mus musculus SWAP complex protein (Swap70), mRNA.                                                                          |
| scl0239743.2 104-S  | 21.1114 | 4.65  | Klhl6         | NM 183390.1 | Mus musculus kelch-like 6 (Drosophila) (Klhl6), mRNA.                                                                      |
| scl31127.23.1 1-S   | 21.0938 | 1.57  | AW538196      | NM 133952.1 | Mus musculus expressed sequence AW538196 (AW538196), mRNA.                                                                 |
| scl0003687.1 76-S   | 21.0638 | 3.8   | Trim23        | NM 030731.1 | Mus musculus tripartite motif protein 23 (Trim23), mRNA.                                                                   |
| scl44948.10 526-S   | 21.0614 | 1.46  | Irf4          | NM 013674.1 | Mus musculus interferon regulatory factor 4 (Irf4), mRNA.                                                                  |
| scl070361.1 127-S   | 21.0465 | 1.42  | Lman1         | NM 027400.2 | Mus musculus lectin, mannose-binding, 1 (Lman1), mRNA.                                                                     |
| scl39143.6.1 8-S    | 21.0374 | 2.04  | Deadc1        | NM 025748.2 | Mus musculus deaminase domain containing 1 (Deadc1), mRNA.                                                                 |
| scl32924.1 1-S      | 20.9847 | 1.88  | BC025206      | NM 146184.2 |                                                                                                                            |
| scl020044.5 19-S    | 20.9749 | 1.68  | Rps14         | NM 020600.2 | Mus musculus ribosomal protein S14 (Rps14), mRNA.                                                                          |
| scl50581.4.1 28-S   | 20.9584 | 1.52  | 2310045B01Rik | NM 025538.1 | Mus musculus RIKEN cDNA 2310045B01 gene (2310045B01Rik), mRNA.                                                             |
| scl38024.23.1 253-S | 20.9432 | 1.49  | A530089117Rik | NM 133999.1 | Mus musculus RIKEN cDNA A530089117 gene (A530089117Rik), mRNA.                                                             |
| scl51843.7.3 62-S   | 20.9257 | 1.55  | 1810029G24Rik | NM 025468.1 | Mus musculus RIKEN cDNA 1810029G24 gene (1810029G24Rik), mRNA.                                                             |
| scl48393.15 330-S   | 20.8912 | 2.04  | Nfkbi2        | NM 030612   |                                                                                                                            |
| scl018120.4 62-S    | 20.8878 | 1.35  | Mprl49        | NM 026246.1 | Mus musculus mitochondrial ribosomal protein L49 (Mprl49), mRNA.                                                           |
| scl36920.15.1 107-S | 20.8872 | 1.46  | Pstpip1       | NM 011193.1 | Mus musculus proline-serine-threonine phosphatase-interacting protein 1 (Pstpip1), mRNA.                                   |
| scl074522.7 319-S   | 20.8859 | 1.45  | Zwcc1         | NM 198162.1 | Mus musculus zinc finger, CW-type with coiled-coil domain 1 (Zwcc1), mRNA.                                                 |
| scl49960.7 412-S    | 20.8661 | 1.72  | Trim39        | NM 024468.1 | Mus musculus tripartite motif protein 39 (Trim39), mRNA.                                                                   |
| scl38270.7 86-S     | 20.8468 | 3.04  | Dnajc14       | NM 028873.2 |                                                                                                                            |
| scl0022661.2 277-S  | 20.8319 | 1.95  | Zfp148        | NM 011749.3 | Mus musculus zinc finger protein 148 (Zfp148), mRNA.                                                                       |
| scl0072333.1 312-S  | 20.8223 | 2.14  | 2410003B16Rik | XM 204283.3 | Mus musculus RIKEN cDNA 2410003B16 gene (2410003B16Rik), mRNA.                                                             |
| scl0014682.1 7-S    | 20.8223 | 1.41  | Gnag          | NM 008139.2 | Mus musculus guanine nucleotide binding protein, alpha q polypeptide (Gnag), mRNA.                                         |

|                                                                |                   |                    |               |                  |                                                                                                                        |
|----------------------------------------------------------------|-------------------|--------------------|---------------|------------------|------------------------------------------------------------------------------------------------------------------------|
| scl067604.1 6-S                                                | 20.8093           | 1.3                | 1110007L15Rik | NM_026269.1      | Mus musculus RIKEN cDNA 1110007L15 gene (1110007L15Rik), mRNA.                                                         |
| scl38195.4 424-S                                               | 20.8051           | 1.56               | Stx11         | XM_203312.2      | Mus musculus syntaxin 11 (Stx11), mRNA.                                                                                |
| scl0068046.2 0-S                                               | 20.7737           | 1.78               | 2700062C07Rik | NM_026529.2      | Mus musculus RIKEN cDNA 2700062C07 gene (2700062C07Rik), mRNA.                                                         |
| scl0022032.1 225-S                                             | 20.7565           | 3.16               | Traf4         | NM_009423.2      | Mus musculus Tnf receptor associated factor 4 (Traf4), mRNA.                                                           |
| scl0018810.1 283-S                                             | 20.7426           | 1.49               | Plec1         | NM_011117        | Mus musculus plectin 1 (Plec1), transcript variant 1, mRNA.                                                            |
| scl066637.1 226-S                                              | 20.7405           | 1.37               | 5730449L18Rik | NM_025677.1      | Mus musculus RIKEN cDNA 5730449L18 gene (5730449L18Rik), mRNA.                                                         |
| scl00332397.1 279-S                                            | 20.7303           | 3.18               | Nanos1        | NM_178421.2      | Mus musculus nanos homolog 1 (Drosophila) (Nanos1), mRNA.                                                              |
| scl0075731.2 157-S                                             | 20.6459           | 1.45               | 5133401N09Rik | NM_198004.1      | Mus musculus RIKEN cDNA 5133401N09 gene (5133401N09Rik), mRNA.                                                         |
| scl48691.8.1 1-S                                               | 20.6457           | 2.01               | Slc25a1       | NM_153150.1      | Mus musculus solute carrier family 25 (mitochondrial carrier; citrate transporter), member 1 (Slc25a1), mRNA.          |
| scl0011975.2 216-S                                             | 20.6099           | 1.36               | Atp6v0a1      | NM_016920.1      | Mus musculus ATPase, H+ transporting, lysosomal V0 subunit a isoform 1 (Atp6v0a1), mRNA.                               |
| scl0054004.2 173-S                                             | 20.5642           | 7.19               | Diap2         | NM_017398.1      | Mus musculus diaphanous homolog 2 (Drosophila) (Diap2), mRNA.                                                          |
| scl0001062.1 67-S                                              | 20.5607           | 1.84               | Cnot4         | NM_016877.2      | Mus musculus CCR4-NOT transcription complex, subunit 4 (Cnot4), mRNA.                                                  |
| scl00224727.2 315-S                                            | 20.5583           | 1.49               | Bat3          | NM_057171.1      | Mus musculus HLA-B-associated transcript 3 (Bat3), mRNA.                                                               |
| scl0067857.2 151-S                                             | 20.5425           | 1.27               | Ppp6c         | NM_024209.1      | Mus musculus protein phosphatase 6, catalytic subunit (Ppp6c), mRNA.                                                   |
| scl48561.1.13 8-S                                              | 20.5309           | 1.5                | 0610012G03Rik | NM_025320        | Mus musculus RIKEN cDNA 0610012G03 gene (0610012G03Rik), mRNA.                                                         |
| scl38757.5.1 81-S                                              | 20.5131           | 1.64               | Ndg2          | NM_175329.3      |                                                                                                                        |
| scl012520.7 274-S                                              | 20.5126           | 1.36               | Cd81          | NM_133655.1      | Mus musculus CD 81 antigen (Cd81), mRNA.                                                                               |
| scl027397.1 17-S                                               | 20.5056           | 1.37               | Mrp17         | NM_025301.1      | Mus musculus mitochondrial ribosomal protein L17 (Mrp17), mRNA.                                                        |
| scl43154.2 481-S                                               | 20.4891           | 1.27               | Arf6          | NM_007481.1      | Mus musculus ADP-ribosylation factor 6 (Arf6), mRNA.                                                                   |
| scl19764.11 583-S                                              | 20.4832           | 1.38               | Tpd52l2       | NM_025482.2      | Mus musculus tumor protein D52-like 2 (Tpd52l2), mRNA.                                                                 |
| scl47919.3 631-S                                               | 20.4787           | 2.07               | D530033C11Rik | NM_030132.2      | Mus musculus RIKEN cDNA D530033C11 gene (D530033C11Rik), mRNA.                                                         |
| scl20534.5 360-S                                               | 20.4767           | 1.41               | Cd59a         | NM_007652.2      | Mus musculus CD59a antigen (Cd59a), mRNA.                                                                              |
| scl06943.7 225-S                                               | 20.3979           | 1.24               | 2310009N05Rik | NM_025861.1      | Mus musculus RIKEN cDNA 2310009N05 gene (2310009N05Rik), mRNA.                                                         |
| scl40580.5.1 111-S                                             | 20.3645           | 1.23               | 1110020P15Rik | NM_197979.1      | Mus musculus RIKEN cDNA 1110020P15 gene (1110020P15Rik), mRNA.                                                         |
| scl0404314.1 3-S                                               | 20.3558           | 9.49               | OlfR257       | NM_207554        | Mus musculus olfactory receptor 257 (OlfR257), mRNA.                                                                   |
| scl142.1.1 252-S                                               | 20.3384           | 10.68              | OlfR370       | NM_146270.1      | Mus musculus olfactory receptor 370 (OlfR370), mRNA.                                                                   |
| scl42976.13.1 6-S                                              | 20.3104           | 1.48               | Coq6          | NM_172582.1      | Mus musculus coenzyme Q6 homolog (yeast) (Coq6), mRNA.                                                                 |
| scl068911.1 313-S                                              | 20.2722           | 1.42               | Pygo2         | XM_130932.5      |                                                                                                                        |
| scl31022.12 350-S                                              | 20.2112           | 1.67               | Capn5         | NM_007602.2      | Mus musculus calpain 5 (Capn5), mRNA.                                                                                  |
| scl068642.1 282-S                                              | 20.2028           | 2.18               | 2810441K11Rik | NM_026798.1      | Mus musculus RIKEN cDNA 2810441K11 gene (2810441K11Rik), mRNA.                                                         |
| scl015207.2 11-S                                               | 20.1973           | 7.12               | Hes3          | NM_008237.1      | Mus musculus hairy and enhancer of split 3 (Drosophila) (Hes3), mRNA.                                                  |
| scl53405.2 540-S                                               | 20.1435           | 3.55               | Zbtb3         | NM_133759.1      | Mus musculus zinc finger and BTB domain containing 3 (Zbtb3), mRNA.                                                    |
| scl0020271.2 300-S                                             | 20.1286           | 10.98              | Scn5a         | NM_021544.1      | Mus musculus sodium channel, voltage-gated, type V, alpha polypeptide (Scn5a), mRNA.                                   |
| scl34704.4 282-S                                               | 20.1264           | 1.43               | C630013N10Rik | NM_172052.1      | Mus musculus RIKEN cDNA C630013N10 gene (C630013N10Rik), mRNA.                                                         |
| scl53371.28 117-S                                              | 20.1195           | 1.27               | Ddb1          | NM_015735.1      | Mus musculus damage specific DNA binding protein 1 (Ddb1), mRNA.                                                       |
| scl45684.12 151-S                                              | 20.1024           | 1.29               | D14Ert226e    | NM_145928        | Mus musculus DNA segment, Chr 14, ERATO Doi 226, expressed (D14Ert226e), mRNA.                                         |
| scl0012334.2 163-S                                             | 20.0907           | 1.39               | Capn2         | NM_009794.1      | Mus musculus calpain 2 (Capn2), mRNA.                                                                                  |
| scl35324.20.1 127-S                                            | 20.0832           | 1.35               | Dhx30         | NM_133347.1      | Mus musculus DEAH (Asp-Glu-Ala-His) box polypeptide 30 (Dhx30), mRNA.                                                  |
| scl056812.9 277-S                                              | 20.0632           | 1.29               | Dnajb10       | NM_178055.2      | Mus musculus DnaJ (Hsp40) homolog, subfamily B, member 10 (Dnajb10), mRNA.                                             |
| scl021357.9 262-S                                              | 20.0571           | 1.32               | Tarbp2        | NM_009319        | Mus musculus TAR (HIV) RNA binding protein 2 (Tarbp2), mRNA.                                                           |
| scl00242687.2 177-S                                            | 20.0183           | 1.89               | Wasf2         | NM_153423.3      | Mus musculus WAS protein family, member 2 (Wasf2), mRNA.                                                               |
| <b>GENES DOWN-REGULATED BY THE ATHEROGENIC DIET IN SPLEENS</b> |                   |                    |               |                  |                                                                                                                        |
| <b>TargetID</b>                                                | <b>Diff Score</b> | <b>Fold Change</b> | <b>Symbol</b> | <b>Accession</b> | <b>Definition</b>                                                                                                      |
| scl24492.20.1 105-S                                            | -371.3336         | -67.09             | 1810074P20Rik | NM_026194.2      | Mus musculus RIKEN cDNA 1810074P20 gene (1810074P20Rik), mRNA.                                                         |
| scl32408.23 56-S                                               | -218.2759         | -2.96              | Picalm        | NM_146194        | Mus musculus phosphatidylinositol binding clathrin assembly protein (Picalm), mRNA.                                    |
| scl0015519.1 14-S                                              | -202.1406         | -4.45              | Hspca         | NM_010480        | Mus musculus heat shock protein 1, alpha (Hspca), mRNA.                                                                |
| scl0016796.1 242-S                                             | -137.0215         | -2.29              | Lasp1         | NM_010688.2      | Mus musculus LIM and SH3 protein 1 (Lasp1), mRNA.                                                                      |
| scl29519.10.9 31-S                                             | -135.1647         | -3.93              | Bcap37        | NM_007531.1      | Mus musculus B-cell receptor-associated protein 37 (Bcap37), mRNA.                                                     |
| scl011951.2 99-S                                               | -118.3322         | -2.05              | Atp5g1        | NM_007506.2      | Mus musculus ATP synthase, H+ transporting, mitochondrial F0 complex, subunit c (subunit 9), isoform 1 (Atp5g1), mRNA. |
| scl0018813.1 104-S                                             | -116.5303         | -2.15              | Pa2g4         | NM_011119.1      | Mus musculus proliferation-associated 2G4 (Pa2g4), mRNA.                                                               |
| scl018643.4 21-S                                               | -109.3146         | -3.01              | Pfn1          | NM_011072.2      | Mus musculus profilin 1 (Pfn1), mRNA.                                                                                  |
| scl26467.3.1 2-S                                               | -102.7471         | -2.1               | Chic2         | NM_028850.1      | Mus musculus cysteine-rich hydrophobic domain 2 (Chic2), mRNA.                                                         |
| scl0022144.2 2-S                                               | -101.6286         | -3.7               | Tuba3         | NM_009446.1      | Mus musculus tubulin, alpha 3 (Tuba3), mRNA.                                                                           |
| scl013681.1 1-S                                                | -100.9534         | -1.96              | Eif4a1        | NM_144958.2      | Mus musculus eukaryotic translation initiation factor 4A1 (Eif4a1), mRNA.                                              |
| scl49148.7.844 25-S                                            | -98.0095          | -3.76              | Cd80          | NM_009855        | Mus musculus CD80 antigen (Cd80), mRNA.                                                                                |
| scl066475.2 30-S                                               | -97.5206          | -2.3               | Rps23         | NM_024175        | Mus musculus ribosomal protein S23 (Rps23), mRNA.                                                                      |

|                     |          |        |               |             |                                                                                                                                 |
|---------------------|----------|--------|---------------|-------------|---------------------------------------------------------------------------------------------------------------------------------|
| scI0001498.1 3411-S | -95.1501 | -2.44  | Ankfy1        | NM_009671   | Mus musculus ankyrin repeat and FYVE domain containing 1 (Ankfy1), mRNA.                                                        |
| scI0003742.1 4-S    | -94.5327 | -1.92  | Tmem14c       | NM_025387.1 |                                                                                                                                 |
| scI011867.9 22-S    | -93.6991 | -1.83  | Arpc1b        | NM_023142.1 | Mus musculus actin related protein 2/3 complex, subunit 1B (Arpc1b), mRNA.                                                      |
| scI0234852.1 50-S   | -90.432  | -1.89  | Pcoln3        | NM_145606.1 | Mus musculus procollagen (type III) N-endopeptidase (Pcoln3), mRNA.                                                             |
| scI0002580.1 4-S    | -89.9325 | -1.8   | Ptp4a3        | NM_008975.2 | Mus musculus protein tyrosine phosphatase 4a3 (Ptp4a3), mRNA.                                                                   |
| scI26557.25 455-S   | -89.7499 | -2.78  | Recc1         | NM_011258.1 | Mus musculus replication factor C 1 (Recc1), mRNA.                                                                              |
| scI46304.5.1 86-S   | -87.8353 | -1.89  | Mrp152        | NM_026851.1 | Mus musculus mitochondrial ribosomal protein L52 (Mrp152), mRNA.                                                                |
| scI28063.9.402 1-S  | -87.4735 | -2.32  | Psmc2         | NM_011188.1 | Mus musculus proteasome (prosome, macropain) 26S subunit, ATPase 2 (Psmc2), mRNA.                                               |
| scI0001433.1 54-S   | -87.3486 | -2.12  | Psmc5         | NM_008950.1 | Mus musculus protease (prosome, macropain) 26S subunit, ATPase 5 (Psmc5), mRNA.                                                 |
| scI017470.1 35-S    | -86.7864 | -2.23  | Cd200         | NM_010818   |                                                                                                                                 |
| scI42037.39 16-S    | -85.2865 | -4.65  | Cdc42bbp      | NM_183016.1 | Mus musculus Cdc42 binding protein kinase beta (Cdc42bbp), mRNA.                                                                |
| scI45915.9 517-S    | -84.9487 | -2.16  | Dnase1l3      | NM_007870.2 | Mus musculus deoxyribonuclease 1-like 3 (Dnase1l3), mRNA.                                                                       |
| scI011984.1 128-S   | -84.6424 | -4.77  | Atp6v0c       | NM_009729.1 | Mus musculus ATPase, H+ transporting, V0 subunit C (Atp6v0c), mRNA.                                                             |
| scI00018.1 3-S      | -82.292  | -2.44  | Ptpre         | NM_011212.2 | Mus musculus protein tyrosine phosphatase, receptor type, E (Ptpre), mRNA.                                                      |
| scI0269261.4 12-S   | -82.2104 | -1.63  | Rpl12         | NM_009076   | Mus musculus ribosomal protein L12 (Rpl12), mRNA.                                                                               |
| scI0002332.1 7-S    | -82.2099 | -1.91  | Dld           | NM_007861   | Mus musculus dihydrolipoamide dehydrogenase (Dld), mRNA.                                                                        |
| scI0015129.1 300-S  | -81.4349 | -2.65  | Hbb-b1        | NM_008220.2 | Mus musculus hemoglobin, beta adult major chain (Hbb-b1), mRNA.                                                                 |
| scI0012301.2 7-S    | -76.367  | -1.94  | Cacybp        | NM_009786.1 | Mus musculus calcyclin binding protein (Cacybp), mRNA.                                                                          |
| scI53421.25 339-S   | -74.0469 | -1.86  | D19Erd703e    | NM_029456.1 | Mus musculus DNA segment, Chr 19, ERATO Doi 703, expressed (D19Erd703e), mRNA.                                                  |
| scI48818.18.1 43-S  | -73.8371 | -1.75  | Trap1         | NM_026508.1 |                                                                                                                                 |
| scI022147.3 29-S    | -73.6889 | -2.77  | Tuba7         | NM_009449.2 | Mus musculus tubulin, alpha 7 (Tuba7), mRNA.                                                                                    |
| scI066167.1 147-S   | -72.6542 | -1.98  | 1110017O22Rik | NM_183250.1 | Mus musculus RIKEN cDNA 1110017O22 gene (1110017O22Rik), mRNA.                                                                  |
| scI068612.6 90-S    | -72.2193 | -2.87  | Ube2c         | NM_026785.1 | Mus musculus ubiquitin-conjugating enzyme E2C (Ube2c), mRNA.                                                                    |
| scI18338.8 547-S    | -69.3786 | -1.88  | Ncoa5         | NM_144892.1 | Mus musculus nuclear receptor coactivator 5 (Ncoa5), mRNA.                                                                      |
| scI31799.8.1 22-S   | -68.8287 | -6.28  | Ube2s         | NM_133777.1 | Mus musculus ubiquitin-conjugating enzyme E2S (Ube2s), mRNA.                                                                    |
| scI47211.15 135-S   | -68.6322 | -2.33  | Rad21         | NM_009009.2 | Mus musculus RAD21 homolog (S. pombe) (Rad21), mRNA.                                                                            |
| scI020638.2 15-S    | -68.5265 | -2.25  | Snrpb         | NM_009225.1 | Mus musculus small nuclear ribonucleoprotein B (Snrpb), mRNA.                                                                   |
| scI0001631.1 196-S  | -68.2634 | -1.93  | Rpo1-1        | NM_009085.1 | Mus musculus RNA polymerase 1-1 (Rpo1-1), mRNA.                                                                                 |
| scI40850.12.1 163-S | -68.1587 | -1.63  | Nmt1          | NM_008707.2 | Mus musculus N-mristoyltransferase 1 (Nmt1), mRNA.                                                                              |
| scI54158.7.21 44-S  | -67.8759 | -4.91  | Bcap31        | NM_012060.2 | Mus musculus B-cell receptor-associated protein 31 (Bcap31), mRNA.                                                              |
| scI014998.4 34-S    | -65.6074 | -2.29  | H2-DMa        | NM_010386   | Mus musculus histocompatibility 2, class II, locus DMa (H2-DMa), mRNA.                                                          |
| scI074410.2 34-S    | -65.5389 | -2.28  | 4932702F08Rik | XM_130221.2 | Mus musculus RIKEN cDNA 4932702F08 gene (4932702F08Rik), mRNA.                                                                  |
| scI0067151.2 31-S   | -64.997  | -4.65  | Psm9          | NM_026000.1 | Mus musculus proteasome (prosome, macropain) 26S subunit, non-ATPase, 9 (Psm9), mRNA.                                           |
| scI012294.1 10-S    | -64.1687 | -8.18  | Cacna2d3      | NM_009785.1 | Mus musculus calcium channel, voltage dependent, alpha2/delta subunit 3 (Cacna2d3), mRNA.                                       |
| scI33602.12.1 74-S  | -64.0774 | -1.8   | Ddx39         | NM_197982.2 | Mus musculus DEAD (Asp-Glu-Ala-Asp) box polypeptide 39 (Ddx39), mRNA.                                                           |
| scI34935.10.1 29-S  | -63.7951 | -4.69  | Dctn6         | NM_011722.1 | Mus musculus dynactin 6 (Dctn6), mRNA.                                                                                          |
| scI40203.12 25-S    | -63.3698 | -1.67  | Sparc         | NM_009242   | Mus musculus secreted acidic cysteine rich glycoprotein (Sparc), mRNA.                                                          |
| scI35917.28 89-S    | -63.2954 | -2.07  | BC023957      | NM_172257.1 |                                                                                                                                 |
| scI056791.4 30-S    | -62.7378 | -3.26  | Ube2l6        | NM_019949.1 | Mus musculus ubiquitin-conjugating enzyme E2L 6 (Ube2l6), mRNA.                                                                 |
| scI00110052.1 94-S  | -61.3876 | -3.36  | Dek           | NM_025900.1 | Mus musculus DEK oncogene (DNA binding) (Dek), mRNA.                                                                            |
| scI021665.1 179-S   | -60.9837 | -2.23  | Tdg           | NM_172552.1 | Mus musculus thymine DNA glycosylase (Tdg), mRNA.                                                                               |
| scI0234388.1 36-S   | -60.5798 | -3     | 1810023B24Rik | XM_134222.1 |                                                                                                                                 |
| scI072042.2 8-S     | -60.3865 | -1.96  | Cotl1         | XM_150115.1 | Mus musculus coactosin-like 1 (Dictyostelium) (Cotl1), mRNA.                                                                    |
| scI0026442.1 315-S  | -60.3832 | -2.29  | Psm5          | NM_011967.1 | Mus musculus proteasome (prosome, macropain) subunit, alpha type 5 (Psm5), mRNA.                                                |
| scI20390.11.1 18-S  | -59.6439 | -1.97  | Ccnbdp1       | NM_010761.1 | Mus musculus cyclin D-type binding-protein 1 (Ccnbdp1), mRNA.                                                                   |
| scI013034.10 9-S    | -59.5635 | -2.1   | Ctse          | NM_007799   | Mus musculus cathepsin E (Ctse), mRNA.                                                                                          |
| scI0057296.1 256-S  | -59.4718 | -1.71  | Psm8          | NM_026545.1 | Mus musculus proteasome (prosome, macropain) 26S subunit, non-ATPase, 8 (Psm8), mRNA.                                           |
| scI015382.13 13-S   | -59.4152 | -1.58  | Hnrpa1        | NM_010447   | Mus musculus heterogeneous nuclear ribonucleoprotein A1 (Hnrpa1), mRNA.                                                         |
| scI015040.2 130-S   | -59.2632 | -2.11  | H2-T23        | NM_010398   | Mus musculus histocompatibility 2, T region locus 23 (H2-T23), mRNA.                                                            |
| scI19818.14.1 56-S  | -59.0092 | -2.45  | Th1l          | NM_020580.1 | Mus musculus TH1-like homolog (Drosophila) (Th1l), mRNA.                                                                        |
| scI38880.29 102-S   | -58.2582 | -1.71  | Psap          | NM_011179   | Mus musculus prosaposin (Psap), mRNA.                                                                                           |
| scI39607.11 182-S   | -58.2246 | -2.26  | Smarca1       | NM_020618.3 | Mus musculus SWI/SNF related, matrix associated, actin dependent regulator of chromatin, subfamily e, member 1 (Smarca1), mRNA. |
| scI40689.20 176-S   | -58.0881 | -22.74 | 39334         | NM_017380.1 | Mus musculus septin 9 (Sept9), mRNA.                                                                                            |
| scI014980.6 15-S    | -57.8918 | -2.28  | H2-L          |             |                                                                                                                                 |
| scI000176.1 12-S    | -57.4369 | -2.71  | Psm1          | NM_011965   | Mus musculus proteasome (prosome, macropain) subunit, alpha type 1 (Psm1), mRNA.                                                |
| scI20055.4.1 10-S   | -56.9017 | -1.68  | Dncl2a        | NM_025947.1 | Mus musculus dynein, cytoplasmic, light chain 2A (Dncl2a), mRNA.                                                                |

|               |        |          |        |               |             |                                                                                                                                                                          |
|---------------|--------|----------|--------|---------------|-------------|--------------------------------------------------------------------------------------------------------------------------------------------------------------------------|
| scl32353.2.4  | 40-S   | -56.1456 | -1.91  | Ndufc2        | NM_024220.1 |                                                                                                                                                                          |
| scl00229534.2 | 23-S   | -56.1275 | -3.76  | Pbxip1        | NM_146131.1 | Mus musculus pre-B-cell leukemia transcription factor interacting protein 1 (Pbxip1), mRNA.                                                                              |
| scl0056491.1  | 59-S   | -55.9859 | -2.3   | Vapb          | NM_019806.3 | Mus musculus vesicle-associated membrane protein, associated protein B and C (Vapb), mRNA.                                                                               |
| scl0066748.2  | 33-S   | -55.9431 | -2.02  | 4933404M02Rik | NM_025744.1 | Mus musculus RIKEN cDNA 4933404M02 gene (4933404M02Rik), mRNA.                                                                                                           |
| scl52080.7.1  | 1-S    | -55.5265 | -14.13 | 2410080P20Rik | NM_026464.2 | Mus musculus RIKEN cDNA 2410080P20 gene (2410080P20Rik), mRNA.                                                                                                           |
| scl0268449.4  | 2-S    | -55.4769 | -1.56  | Rpl23a        | NM_207523   |                                                                                                                                                                          |
| scl066506.1   | 15-S   | -55.2828 | -6.93  | 1810042K04Rik | NM_025604.1 | Mus musculus RIKEN cDNA 1810042K04 gene (1810042K04Rik), mRNA.                                                                                                           |
| scl0003766.1  | 1206-S | -54.9477 | -3.84  | Mknk2         | NM_021462   | Mus musculus MAP kinase-interacting serine/threonine kinase 2 (Mknk2), mRNA.                                                                                             |
| scl0077038.2  | 139-S  | -54.7262 | -2.1   | Zfp289        | NM_023854.1 | Mus musculus zinc finger protein 289 (Zfp289), mRNA.                                                                                                                     |
| scl0021974.1  | 259-S  | -54.6431 | -1.69  | Top2b         | NM_009409.2 | Mus musculus topoisomerase (DNA) II beta (Top2b), mRNA.                                                                                                                  |
| scl32920.6.1  | 10-S   | -54.1229 | -2.33  | Tgfb1         | NM_011577.1 | Mus musculus transforming growth factor, beta 1 (Tgfb1), mRNA.                                                                                                           |
| scl38665.9.1  | 23-S   | -54.0405 | -1.56  | Map2k2        | NM_023138.3 | Mus musculus mitogen activated protein kinase kinase 2 (Map2k2), mRNA.                                                                                                   |
| scl024075.4   | 0-S    | -53.9991 | -1.58  | Taf10         | NM_020024.3 | Mus musculus TAF10 RNA polymerase II, TATA box binding protein (TBP)-associated factor (Taf10), mRNA.                                                                    |
| scl020810.7   | 29-S   | -53.6394 | -4.22  | Srm           | NM_009272.2 | Mus musculus spermidine synthase (Srm), mRNA.                                                                                                                            |
| scl0018220.1  | 39-S   | -53.2818 | -1.8   | Nucb1         | NM_008749.1 |                                                                                                                                                                          |
| scl0066377.1  | 24-S   | -53.1874 | -1.7   | Ndufc1        | NM_025523.1 | Mus musculus NADH dehydrogenase (ubiquinone) 1, subcomplex unknown, 1 (Ndufc1), mRNA.                                                                                    |
| scl0023908.1  | 1058-S | -53.0643 | -2.33  | Fus           | NM_139149.1 | Mus musculus fusion, derived from t(12;16) malignant liposarcoma (human) (Fus), mRNA.                                                                                    |
| scl49191.18.1 | 6-S    | -52.7815 | -3.63  | Sema5b        | XM_147227.1 | Mus musculus sema domain, seven thrombospondin repeats (type 1 and type 1-like), transmembrane domain (TM) and short cytoplasmic domain, (semaphorin) 5B (Sema5b), mRNA. |
| scl0012514.2  | 91-S   | -52.5194 | -3.31  | Cd68          | NM_009853.1 | Mus musculus CD68 antigen (Cd68), mRNA.                                                                                                                                  |
| scl19447.7.1  | 15-S   | -52.1682 | -1.57  | 2900010J23Rik | NM_175190.2 | Mus musculus RIKEN cDNA 2900010J23 gene (2900010J23Rik), mRNA.                                                                                                           |
| scl0019087.2  | 280-S  | -52.1606 | -2.46  | Prkar2a       | NM_008924.1 | Mus musculus protein kinase, cAMP dependent regulatory, type II alpha (Prkar2a), mRNA.                                                                                   |
| scl22501.2    | 29-S   | -52.1031 | -3.12  | 39340         | NM_053102   | Mus musculus selenoprotein (Sep15), mRNA.                                                                                                                                |
| scl17471.3    | 7-S    | -51.7663 | -1.79  | Ppp1r15b      | XM_148953.1 | Mus musculus protein phosphatase 1, regulatory (inhibitor) subunit 15b (Ppp1r15b), mRNA.                                                                                 |
| scl29109.11   | 491-S  | -51.7635 | -1.56  | Mkrm1         | NM_018810.1 | Mus musculus makorin, ring finger protein, 1 (Mkrm1), mRNA.                                                                                                              |
| scl015528.3   | 20-S   | -51.3776 | -1.58  | Hspe1         | NM_008303.2 | Mus musculus heat shock protein 1 (chaperonin 10) (Hspe1), mRNA.                                                                                                         |
| scl000794.1   | 5-S    | -50.6965 | -1.61  | Tsn           | NM_011650.2 | Mus musculus translin (Tsn), mRNA.                                                                                                                                       |
| scl014376.17  | 49-S   | -49.533  | -1.55  | Ganab         | NM_008060.1 |                                                                                                                                                                          |
| scl0003301.1  | 436-S  | -49.4265 | -14.2  | Nfs1          | NM_010911.1 | Mus musculus nitrogen fixation gene 1 (S. cerevisiae) (Nfs1), mRNA.                                                                                                      |
| scl44070.4.1  | 3-S    | -49.3173 | -2.01  | Eef1e1        | NM_025380.1 | Mus musculus eukaryotic translation elongation factor 1 epsilon 1 (Eef1e1), mRNA.                                                                                        |
| scl080876.2   | 10-S   | -48.5893 | -1.81  | Ifitm2        | NM_030694   | Mus musculus interferon induced transmembrane protein 2 (Ifitm2), mRNA.                                                                                                  |
| scl27115.7.1  | 28-S   | -48.4197 | -1.63  | Ttc11         | NM_025562.1 | Mus musculus tetra- and pentapeptide repeat domain 11 (Ttc11), mRNA.                                                                                                     |
| scl068077.3   | 0-S    | -48.3097 | -1.63  | Gltscr2       | NM_133831.1 | Mus musculus glioma tumor suppressor candidate region gene 2 (Gltscr2), mRNA.                                                                                            |
| scl0218490.3  | 0-S    | -47.9279 | -1.88  | Btf3          | NM_145455.1 | Mus musculus basic transcription factor 3 (Btf3), mRNA.                                                                                                                  |
| scl020813.1   | 157-S  | -47.5379 | -1.52  | Srp14         | NM_009273.2 | Mus musculus signal recognition particle 14 (Srp14), mRNA.                                                                                                               |
| scl012757.9   | 180-S  | -47.4875 | -1.76  | Cita          | NM_016760.1 | Mus musculus clathrin, light polypeptide (Lca) (Cita), mRNA.                                                                                                             |
| scl019988.6   | 33-S   | -47.05   | -1.57  | Rpl6          | NM_011290   | Mus musculus ribosomal protein L6 (Rpl6), mRNA.                                                                                                                          |
| scl0068198.2  | 271-S  | -47.0452 | -3.56  | Ndufb2        | NM_026612.1 | Mus musculus NADH dehydrogenase (ubiquinone) 1 beta subcomplex, 2 (Ndufb2), mRNA.                                                                                        |
| scl000673.1   | 3-S    | -46.6585 | -1.48  | Prdx2         | NM_011563   | Mus musculus peroxiredoxin 2 (Prdx2), mRNA.                                                                                                                              |
| scl058810.1   | 30-S   | -46.64   | -1.55  | Akr1a4        | NM_021473.2 | Mus musculus aldo-keto reductase family 1, member A4 (aldehyde reductase) (Akr1a4), mRNA.                                                                                |
| scl029864.1   | 22-S   | -46.5341 | -1.52  | Rnf11         | NM_013876.2 | Mus musculus ring finger protein 11 (Rnf11), mRNA.                                                                                                                       |
| scl50134.9    | 8-S    | -46.3203 | -2.02  | Nudt3         | NM_019837.1 | Mus musculus nudix (nucleotide diphosphate linked moiety X)-type motif 3 (Nudt3), mRNA.                                                                                  |
| scl48206.19   | 77 2-S | -46.1897 | -1.91  | Gart          | NM_010256.1 | Mus musculus phosphoribosylglycinamide formyltransferase (Gart), mRNA.                                                                                                   |
| scl0192292.18 | 41-S   | -45.8657 | -10.55 | Nrbp          | NM_147201.1 | Mus musculus nuclear receptor binding protein (Nrbp), mRNA.                                                                                                              |
| scl49830.2.1  | 22-S   | -45.7423 | -2.87  | Bzrp11        | NM_027292.1 | Mus musculus benzodiazepine receptor, peripheral-like 1 (Bzrp11), mRNA.                                                                                                  |
| scl40144.28.1 | 2-S    | -45.2545 | -2.53  | Fliih         | NM_022009.1 | Mus musculus flightless 1 homolog (Drosophila) (Fliih), mRNA.                                                                                                            |
| scl38191.11.1 | 70-S   | -45.1359 | -3.82  | 2610020N02Rik | NM_181470.2 | Mus musculus RIKEN cDNA 2610020N02 gene (2610020N02Rik), mRNA.                                                                                                           |
| GI_21746160-S |        | -45.0741 | -3.86  | 2410129E14Rik | NM_023716.1 | Mus musculus RIKEN cDNA 2410129E14 gene (2410129E14Rik), mRNA.                                                                                                           |
| scl0017938.1  | 31-S   | -44.9736 | -3.26  | Naca          | NM_013608.2 | Mus musculus nascent polypeptide-associated complex alpha polypeptide (Naca), mRNA.                                                                                      |
| scl30947.3    | 219-S  | -44.7465 | -1.8   | Rhog          | NM_019566.2 | Mus musculus ras homolog gene family, member G (Rhog), mRNA.                                                                                                             |
| scl42936.6.9  | 32-S   | -44.4301 | -1.71  | Ahsa1         | NM_146036.1 | Mus musculus AHA1, activator of heat shock 90kDa protein ATPase homolog 1 (yeast) (Ahsa1), mRNA.                                                                         |
| scl021770.4   | 4-S    | -44.3465 | -2.21  | Ppp2r5d       | NM_009358.2 | Mus musculus protein phosphatase 2, regulatory subunit B (B56), delta isoform (Ppp2r5d), mRNA.                                                                           |
| scl55019.13   | 214-S  | -43.954  | -3.25  | Pctk1         | NM_011049.2 | Mus musculus PCTAIRE-motif protein kinase 1 (Pctk1), mRNA.                                                                                                               |
| scl38604.10.1 | 9-S    | -43.9307 | -2.64  | Fbxo7         | NM_153195.1 | Mus musculus F-box only protein 7 (Fbxo7), mRNA.                                                                                                                         |
| scl067674.3   | 12-S   | -43.7274 | -1.93  | 0610038D11Rik | NM_026306.1 | Mus musculus RIKEN cDNA 0610038D11 gene (0610038D11Rik), mRNA.                                                                                                           |
| scl21701.9.1  | 3-S    | -43.6948 | -1.95  | Atp5f1        | NM_009725.1 | Mus musculus ATP synthase, H+ transporting, mitochondrial F0 complex, subunit b, isoform 1 (Atp5f1), mRNA.                                                               |
| scl000330.1   | 8-S    | -43.3607 | -1.87  | Pdlim2        | NM_145978.1 | Mus musculus PDZ and LIM domain 2 (Pdlim2), mRNA.                                                                                                                        |

|                 |       |          |        |               |                   |                                                                                                                     |
|-----------------|-------|----------|--------|---------------|-------------------|---------------------------------------------------------------------------------------------------------------------|
| scl50733.5.1    | 21-S  | -42.9037 | -2.41  | H2-M3         | NM_013819.1       | Mus musculus histocompatibility 2, M region locus 3 (H2-M3), mRNA.                                                  |
| scl00264064.2   | 74-S  | -42.8729 | -5.52  | Cdk8          | NM_181570.1       | Mus musculus cyclin-dependent kinase 8 (Cdk8), transcript variant 1, mRNA.                                          |
| scl25185.2.323  | 16-S  | -42.8588 | -3.29  | Ppap2b        | NM_080555.1       | Mus musculus phosphatidic acid phosphatase type 2B (Ppap2b), mRNA.                                                  |
| scl0002315.1    | 12-S  | -42.7778 | -3.14  |               | XM_358429.1       | Mus musculus LOC380788 (LOC380788), mRNA.                                                                           |
| scl29713.3      | 34-S  | -42.3009 | -1.62  | Arl6ip5       | NM_022992.1       | Mus musculus ADP-ribosylation factor-like 6 interacting protein 5 (Arl6ip5), mRNA.                                  |
| scl019045.1     | 99-S  | -42.2202 | -1.49  | Ppp1ca        | NM_031868.1       | Mus musculus protein phosphatase 1, catalytic subunit, alpha isoform (Ppp1ca), mRNA.                                |
| scl067278.1     | 10-S  | -42.0556 | -2.4   | 2900092E17Rik | NM_030240.1       | Mus musculus RIKEN cDNA 2900092E17 gene (2900092E17Rik), mRNA.                                                      |
| scl36516.9.290  | 30-S  | -41.6761 | -1.69  | Ptk9l         | NM_011876.2       | Mus musculus protein tyrosine kinase 9-like (A6-related protein) (Ptk9l), mRNA.                                     |
| scl43224.11.1   | 2-S   | -41.5214 | -2.4   | Coch          | NM_007728.2       | Mus musculus coagulation factor C homolog (Limulus polyphemus) (Coch), mRNA.                                        |
| scl020443.1     | 125-S | -41.5042 | -3.11  | Siat4c        | NM_009178.2       | Mus musculus sialyltransferase 4C (beta-galactoside alpha-2,3-sialyltransferase) (Siat4c), mRNA.                    |
| scl0015260.1    | 245-S | -41.3557 | -2.85  | Hira          | NM_010435.1       | Mus musculus histone cell cycle regulation defective homolog A (S. cerevisiae) (Hira), mRNA.                        |
| scl0014425.2    | 292-S | -41.3141 | -9.84  | Galnt3        | NM_015736.1       | Mus musculus UDP-N-acetyl-alpha-D-galactosamine:polypeptide N-acetylgalactosaminyltransferase 3 (Galnt3), mRNA.     |
| scl0228608.7    | 126-S | -41.064  | -1.43  | Smox          | NM_145533.1       | Mus musculus spermine oxidase (Smox), mRNA.                                                                         |
| scl45439.8      | 694-S | -41.0446 | -10.58 | Gata4         | NM_008092.2       | Mus musculus GATA binding protein 4 (Gata4), mRNA.                                                                  |
| scl056348.1     | 132-S | -40.9127 | -1.9   | Hsd17b12      | NM_019657.2       | Mus musculus hydroxysteroid (17-beta) dehydrogenase 12 (Hsd17b12), mRNA.                                            |
| scl46411.5.1    | 45-S  | -40.8555 | -4.25  | 1810009H17Rik | XM_283205.1       |                                                                                                                     |
| scl017938.7     | 45-S  | -40.656  | -1.6   | Naca          | NM_013608.2       | Mus musculus nascent polypeptide-associated complex alpha polypeptide (Naca), mRNA.                                 |
| scl022629.4     | 2-S   | -40.5874 | -1.84  | Ywhah         | NM_011738         | Mus musculus tyrosine 3-monooxygenase/tryptophan 5-monooxygenase activation protein, eta polypeptide (Ywhah), mRNA. |
| scl42971.1      | 9-S   | -40.5292 | -1.54  | 0710001C05Rik | XM_203592.1       | Mus musculus RIKEN cDNA 0710001C05 gene (0710001C05Rik), mRNA.                                                      |
| scl00223696.2   | 201-S | -40.5185 | -1.88  | Tomm22        | NM_172609.2       | Mus musculus translocase of outer mitochondrial membrane 22 homolog (yeast) (Tomm22), mRNA.                         |
| scl00276770.1   | 2-S   | -40.3271 | -2.43  | Eif5a         | NM_181582.2       | Mus musculus eukaryotic translation initiation factor 5A (Eif5a), mRNA.                                             |
| scl52637.16.1   | 4-S   | -40.0973 | -2.35  | Pip5k1a       | NM_008846.1       | Mus musculus phosphatidylinositol-4-phosphate 5-kinase, type 1 alpha (Pip5k1a), mRNA.                               |
| scl46497.11.10  | 2-S   | -40.0862 | -7.74  | 2510015F01Rik | XM_354801.1       | Mus musculus RIKEN cDNA 2510015F01 gene (2510015F01Rik), mRNA.                                                      |
| scl52675.8.401  | 6-S   | -40.0663 | -1.52  | Ostf1         | NM_017375.1       | Mus musculus osteoclast stimulating factor 1 (Ostf1), mRNA.                                                         |
| scl35222.4      | 425-S | -40.0099 | -2.02  | Myd88         | NM_010851         | Mus musculus myeloid differentiation primary response gene 88 (Myd88), mRNA.                                        |
| scl26406.12     | 265-S | -40.0077 | -1.76  | Grsf1         | NM_178700.2       | Mus musculus G-rich RNA sequence binding factor 1 (Grsf1), mRNA.                                                    |
| scl015510.1     | 74-S  | -39.9469 | -1.55  | Hspd1         | NM_010477.2       | Mus musculus heat shock protein 1 (chaperonin) (Hspd1), mRNA.                                                       |
| scl0003793.1    | 0-S   | -39.6945 | -1.93  | Metap2        | NM_019648.2       | Mus musculus methionine aminopeptidase 2 (Metap2), mRNA.                                                            |
| scl071780.11    | 24-S  | -39.634  | -8.71  | Isyna1        | NM_023627.1       | Mus musculus myo-inositol 1-phosphate synthase A1 (Isyna1), mRNA.                                                   |
| scl41564.10     | 42-S  | -39.5743 | -2.05  |               | 39333 NM_033144.1 | Mus musculus septin 8 (Sept8), mRNA.                                                                                |
| scl53104.2      | 253-S | -39.5678 | -3.24  | Nkx2-3        | XM_129268.4       | Mus musculus NK2 transcription factor related, locus 3 (Drosophila) (Nkx2-3), mRNA.                                 |
| scl0016195.2    | 10-S  | -39.5187 | -7.87  | Il6st         | NM_010560.2       | Mus musculus interleukin 6 signal transducer (Il6st), mRNA.                                                         |
| scl0020788.1    | 174-S | -39.4169 | -1.87  | Srebp2        | XM_127995.4       |                                                                                                                     |
| scl000245.1     | 108-S | -39.0679 | -1.96  | Irf3          | NM_016849.2       | Mus musculus interferon regulatory factor 3 (Irf3), mRNA.                                                           |
| scl0004033.1    | 10-S  | -39.0445 | -1.85  | Arcp1a        | NM_019767.1       | Mus musculus actin related protein 2/3 complex, subunit 1A (Arcp1a), mRNA.                                          |
| scl056436.9     | 4-S   | -38.9735 | -1.7   | Adrm1         | NM_019822.2       | Mus musculus adhesion regulating molecule 1 (Adrm1), mRNA.                                                          |
| scl35215.8      | 496-S | -38.6955 | -11.66 | Axud1         | NM_153287.2       | Mus musculus AXIN1 up-regulated 1 (Axud1), mRNA.                                                                    |
| scl36686.18.1   | 100-S | -38.6235 | -1.88  | Gclc          | NM_010295.1       | Mus musculus glutamate-cysteine ligase, catalytic subunit (Gclc), mRNA.                                             |
| scl41225.47     | 412-S | -38.5233 | -14.69 | Myo18a        | NM_011586.1       | Mus musculus myosin XVIIIa (Myo18a), mRNA.                                                                          |
| scl064656.5     | 1-S   | -38.5087 | -1.7   | Mrps23        | NM_024174.4       | Mus musculus mitochondrial ribosomal protein S23 (Mrps23), mRNA.                                                    |
| scl21185.13.1   | 16-S  | -38.4442 | -1.53  | Anapc2        | NM_175300.2       | Mus musculus anaphase promoting complex subunit 2 (Anapc2), mRNA.                                                   |
| scl067885.2     | 20-S  | -38.4151 | -3.05  | 1500011K16Rik | NM_175125.2       | Mus musculus RIKEN cDNA 1500011K16 gene (1500011K16Rik), mRNA.                                                      |
| scl000533.1     | 30-S  | -38.3962 | -2.04  | Yif1          | NM_026553.2       | Mus musculus Yip1 interacting factor homolog (S. cerevisiae) (Yif1), mRNA.                                          |
| scl21422.13.1   | 102-S | -38.3601 | -13.19 | Clca1         | NM_009899.2       | Mus musculus chloride channel calcium activated 1 (Clca1), mRNA.                                                    |
| scl34048.16.227 | 13-S  | -38.1977 | -3.41  | Cdc16         | NM_027276.1       | Mus musculus CDC16 cell division cycle 16 homolog (S. cerevisiae) (Cdc16), mRNA.                                    |
| scl23453.4      | 99-S  | -37.9259 | -1.46  | 1200015A19Rik | NM_026388.1       | Mus musculus RIKEN cDNA 1200015A19 gene (1200015A19Rik), mRNA.                                                      |
| scl45278.7.1    | 11-S  | -37.8869 | -10.73 | Dnajd1        | NM_025384.3       | Mus musculus DnaJ (Hsp40) homolog, subfamily D, member 1 (Dnajd1), mRNA.                                            |
| scl37744.8.1    | 11-S  | -37.6886 | -1.55  | ORF61         | XM_109575.3       | Mus musculus open reading frame 61 (ORF61), mRNA.                                                                   |
| scl018245.5     | 1-S   | -37.6678 | -1.55  | Oaz1          | NM_008753         | Mus musculus ornithine decarboxylase antizyme (Oaz1), mRNA.                                                         |
| scl0012946.2    | 160-S | -37.6598 | -1.54  | Crry          | NM_013499.1       | Mus musculus complement receptor related protein (Crry), mRNA.                                                      |
| scl0001137.1    | 14-S  | -37.4518 | -6.74  | Mrps25        | NM_025578.2       | Mus musculus mitochondrial ribosomal protein S25 (Mrps25), mRNA.                                                    |
| scl42112.9.1    | 0-S   | -37.2485 | -1.54  | Ddx24         | NM_020494.2       | Mus musculus DEAD (Asp-Glu-Ala-Asp) box polypeptide 24 (Ddx24), mRNA.                                               |
| scl34884.5.1    | 26-S  | -37.2099 | -9.9   | Frg1          | NM_013522.1       | Mus musculus FSHD region gene 1 (Frg1), mRNA.                                                                       |
| scl068183.7     | 27-S  | -37.1865 | -1.47  | Bcas2         | NM_026602.1       | Mus musculus breast carcinoma amplified sequence 2 (Bcas2), mRNA.                                                   |
| scl18407.1      | 27-S  | -37.0165 | -5.8   | Ma1b          | NM_010658.2       | Mus musculus v-maf musculoaponeurotic fibrosarcoma oncogene family, protein B (avian) (Ma1b), mRNA.                 |
| scl0328601.1    | 103-S | -37.0102 | -1.52  | Cent1         | XM_286697.2       | Mus musculus cyclin T1 (Cent1), mRNA.                                                                               |



|               |          |          |          |          |             |                                                                                                                               |                                                                                          |
|---------------|----------|----------|----------|----------|-------------|-------------------------------------------------------------------------------------------------------------------------------|------------------------------------------------------------------------------------------|
| scl0114887.6  | 24-S     | -36.9359 | -3       | Rmcs1    | NM_207105.1 | Mus musculus response to metastatic cancers 1 (Rmcs1), mRNA.                                                                  |                                                                                          |
| scl0056045.1  | 160-S    | -36.8985 | -1.64    | Samhd1   | NM_018851.2 | Mus musculus SAM domain and HD domain, 1 (Samhd1), mRNA.                                                                      |                                                                                          |
| scl006483.1   | 326-S    | -36.8122 | -1.51    | Rpl36al  | NM_025589.1 | Mus musculus ribosomal protein L36a-like (Rpl36al), mRNA.                                                                     |                                                                                          |
| scl0013829.2  | 259-S    | -36.7256 | -1.65    | Epb4.9   | NM_013514.2 | Mus musculus erythrocyte protein band 4.9 (Epb4.9), mRNA.                                                                     |                                                                                          |
| scl0001687.1  | 10-S     | -36.4031 | -1.92    | Mylc2b   | NM_023402   |                                                                                                                               |                                                                                          |
| scl0268373.4  | 12-S     | -36.2438 | -1.44    | Ppia     | NM_008907   | Mus musculus peptidylprolyl isomerase A (Ppia), mRNA.                                                                         |                                                                                          |
| scl0059069.1  | 170-S    | -35.4541 | -1.36    | Tpm3     | NM_022314.2 | Mus musculus tropomyosin 3, gamma (Tpm3), mRNA.                                                                               |                                                                                          |
| scl056455.3   | 23-S     | -35.3549 | -1.54    | Dnclcl1  | NM_019682   | Mus musculus dynein, cytoplasmic, light chain 1 (Dnclcl1), mRNA.                                                              |                                                                                          |
| IGKV8-26      | AJ235945 | lg       | -35.3233 |          |             |                                                                                                                               |                                                                                          |
| scl20009.15   | 26       | 12-S     | -35.1062 | -1.8     | Ctnnb1      | NM_025680.2                                                                                                                   | Mus musculus catenin, beta like 1 (Ctnnb1), mRNA.                                        |
| scl20983.4    | 177-S    | -35.0441 | -2.18    | Arpc5l   | NM_028809.1 | Mus musculus actin related protein 2/3 complex, subunit 5-like (Arpc5l), mRNA.                                                |                                                                                          |
| scl0014312.2  | 62-S     | -35.0383 | -1.43    | Brd2     | NM_010238.1 | Mus musculus bromodomain containing 2 (Brd2), mRNA.                                                                           |                                                                                          |
| scl014894.1   | 227-S    | -34.8969 | -5.08    | Gtl3     | NM_008187.1 | Mus musculus gene trap locus 3 (Gtl3), mRNA.                                                                                  |                                                                                          |
| scl49476.8    | 9        | 25-S     | -34.8601 | -1.88    | Hmox2       | NM_010443.1                                                                                                                   | Mus musculus heme oxygenase (decycling) 2 (Hmox2), mRNA.                                 |
| scl51506.2    | 48-S     | -34.7338 | -2.2     | Cd14     | NM_009841.2 | Mus musculus CD14 antigen (Cd14), mRNA.                                                                                       |                                                                                          |
| scl000196.1   | 9-S      | -34.6243 | -3.74    | Actn4    | NM_021895.2 | Mus musculus actinin alpha 4 (Actn4), mRNA.                                                                                   |                                                                                          |
| scl0321022.1  | 67-S     | -34.6157 | -1.37    | Cdv3     | NM_175833.1 | Mus musculus carnitine deficiency-associated gene expressed in ventricle 3 (Cdv3), mRNA.                                      |                                                                                          |
| scl32052.6    | 1        | 83-S     | -34.4859 | -3.27    | Ypel3       | NM_025347.1                                                                                                                   |                                                                                          |
| scl38822.17   | 1        | 2-S      | -34.4391 | -8.61    | Jmjd1c      | NM_207221.1                                                                                                                   |                                                                                          |
| scl33416.4    | 1        | 0-S      | -34.3863 | -1.49    | Hspc171     | NM_025486.1                                                                                                                   |                                                                                          |
| scl31568.26   | 194      | 22-S     | -34.3758 | -1.5     | Actn4       | NM_021895.2                                                                                                                   | Mus musculus actinin alpha 4 (Actn4), mRNA.                                              |
| IGKV12-67     | AJ235933 | lg       | -34.3712 | -2.41    |             |                                                                                                                               |                                                                                          |
| scl42795.16   | 1        | 26-S     | -34.2984 | -1.46    | Evl         | NM_007965.2                                                                                                                   | Mus musculus Ena-vasodilator stimulated phosphoprotein (Evl), mRNA.                      |
| scl0110557.2  | 204-S    | -34.2792 | -1.82    | H2-Q6    | NM_207648   | Mus musculus histocompatibility 2, Q region locus 6 (H2-Q6), mRNA.                                                            |                                                                                          |
| scl52692.1    | 233-S    | -34.2707 | -1.44    | Eif4a1   | NM_144958   | Mus musculus eukaryotic translation initiation factor 4A1 (Eif4a1), mRNA.                                                     |                                                                                          |
| scl38886.15   | 179-S    | -34.2194 | -6.09    | Cbar1    | NM_144822.1 | Mus musculus calcium binding atopy-related autoantigen 1 (Cbar1), mRNA.                                                       |                                                                                          |
| scl32817.6    | 1        | 8-S      | -34.1182 | -1.45    | Tyrobp      | NM_011662.2                                                                                                                   | Mus musculus TYRO protein tyrosine kinase binding protein (Tyrobp), mRNA.                |
| scl26190.16   | 67-S     | -34.0936 | -1.41    | Coro1c   | NM_011779.2 | Mus musculus coronin, actin binding protein 1C (Coro1c), mRNA.                                                                |                                                                                          |
| scl0001446.1  | 126-S    | -34.0764 | -1.75    | Gosr2    | NM_019650.2 | Mus musculus golgi SNAP receptor complex member 2 (Gosr2), mRNA.                                                              |                                                                                          |
| scl0053607.2  | 231-S    | -33.9527 | -2.08    | Snrpa    | NM_015782.2 | Mus musculus small nuclear ribonucleoprotein polypeptide A (Snrpa), mRNA.                                                     |                                                                                          |
| scl50849.26   | 1        | 265-S    | -33.9199 | -1.63    | Myo1f       | NM_053214.1                                                                                                                   | Mus musculus myosin IF (Myo1f), mRNA.                                                    |
| scl057437.1   | 41-S     | -33.802  | -3.77    | Golga7   | NM_020585.1 | Mus musculus golgi autoantigen, golgin subfamily a, 7 (Golga7), mRNA.                                                         |                                                                                          |
| scl25278.23   | 305-S    | -33.7831 | -8.47    | Tek      | NM_013690.1 | Mus musculus endothelial-specific receptor tyrosine kinase (Tek), mRNA.                                                       |                                                                                          |
| scl41383.7    | 120      | 88-S     | -33.7022 | -1.61    | Aurkb       | XM_181344.3                                                                                                                   | Mus musculus aurora kinase B (Aurkb), mRNA.                                              |
| scl018727.3   | 44-S     | -33.5866 | -4.89    | Pira4    | NM_011091   | Mus musculus paired-Ig-like receptor A4 (Pira4), mRNA.                                                                        |                                                                                          |
| scl056351.11  | 60-S     | -33.5452 | -1.76    | Tebp     | NM_019766.2 | Mus musculus telomerase binding protein, p23 (Tebp), mRNA.                                                                    |                                                                                          |
| scl0002678.1  | 34-S     | -33.5062 | -1.71    | Magoh    | NM_010760.1 | Mus musculus mago-nashi homolog, proliferation-associated (Drosophila) (Magoh), mRNA.                                         |                                                                                          |
| scl24944.2    | 480-S    | -33.5008 | -1.69    | BC003266 | NM_030252.1 | Mus musculus cDNA sequence BC003266 (BC003266), mRNA.                                                                         |                                                                                          |
| scl22236.8    | 4-S      | -33.1368 | -1.49    | Ccna2    | NM_009828.1 | Mus musculus cyclin A2 (Ccna2), mRNA.                                                                                         |                                                                                          |
| scl077134.2   | 4-S      | -33.0533 | -1.96    | Hnrpa0   |             |                                                                                                                               |                                                                                          |
| scl54435.12   | 1        | 121-S    | -33.0128 | -1.38    | Was         | NM_009515.1                                                                                                                   | Mus musculus Wiskott-Aldrich syndrome homolog (human) (Was), mRNA.                       |
| scl00110842.1 | 108-S    | -32.7732 | -1.57    | Etfa     | NM_145615.2 | Mus musculus electron transferring flavoprotein, alpha polypeptide (Etfa), nuclear gene encoding mitochondrial protein, mRNA. |                                                                                          |
| scl50206.42   | 1        | 126-S    | -32.7507 | -2       | Tsc2        | NM_011647                                                                                                                     | Mus musculus tuberous sclerosis 2 (Tsc2), mRNA.                                          |
| scl0002187.1  | 532-S    | -32.6114 | -1.55    | Rab18    | NM_181070.2 | Mus musculus RAB18, member RAS oncogene family (Rab18), mRNA.                                                                 |                                                                                          |
| scl47039.3    | 1        | 28-S     | -32.5906 | -2.7     | Fbxl6       | NM_013909.1                                                                                                                   | Mus musculus F-box and leucine-rich repeat protein 6 (Fbxl6), mRNA.                      |
| scl071514.8   | 14-S     | -32.5338 | -1.39    | Sfpq     | NM_023603.1 | Mus musculus splicing factor proline/glutamine rich (polypyrimidine tract binding protein associated) (Sfpq), mRNA.           |                                                                                          |
| scl0116891.1  | 127-S    | -32.4455 | -1.78    | BC005682 | NM_033562.2 | Mus musculus cDNA sequence BC005682 (BC005682), mRNA.                                                                         |                                                                                          |
| scl056620.6   | 30-S     | -32.3942 | -1.6     | Clecsf10 | NM_020001.1 | Mus musculus C-type (calcium dependent, carbohydrate recognition domain) lectin, superfamily member 10 (Clecsf10), mRNA.      |                                                                                          |
| scl00107250.1 | 231-S    | -32.3759 | -2.33    | Kazald1  | NM_178929.2 |                                                                                                                               |                                                                                          |
| scl011816.1   | 11-S     | -32.2386 | -2.03    | Apoe     | NM_009696.2 | Mus musculus apolipoprotein E (Apoe), mRNA.                                                                                   |                                                                                          |
| scl0381974.1  | 329-S    | -32.2379 | -9.21    | Mrgprg   | NM_203492.1 | Mus musculus MAS-related GPR, member G (Mrgprg), mRNA.                                                                        |                                                                                          |
| scl0004139.1  | 41-S     | -32.2261 | -2.71    | Asrij    | NM_023429.2 | Mus musculus asrij protein (Asrij), mRNA.                                                                                     |                                                                                          |
| scl50198.3    | 1        | 17-S     | -32.1762 | -1.49    | Ndufb10     | XM_128594.4                                                                                                                   | Mus musculus NADH dehydrogenase (ubiquinone) 1 beta subcomplex, 10 (Ndufb10), mRNA.      |
| scl053606.2   | 17-S     | -32.1412 | -2.04    | G1p2     | NM_015783.1 | Mus musculus interferon, alpha-inducible protein (G1p2), mRNA.                                                                |                                                                                          |
| scl16496.1    | 30-S     | -32.0915 | -3.02    | Arl7     | NM_177305.2 |                                                                                                                               |                                                                                          |
| scl30348.4    | 1        | 28-S     | -32.0905 | -1.52    | Lsm8        | NM_133939.1                                                                                                                   | Mus musculus LSM8 homolog, U6 small nuclear RNA associated (S. cerevisiae) (Lsm8), mRNA. |

|               |       |          |       |               |             |                                                                                                                                   |
|---------------|-------|----------|-------|---------------|-------------|-----------------------------------------------------------------------------------------------------------------------------------|
| sc134186.14   | 327-S | -32.0505 | -1.72 | Abcb10        | NM_019552.1 | Mus musculus ATP-binding cassette, sub-family B (MDR/TAP), member 10 (Abcb10), nuclear gene encoding mitochondrial protein, mRNA. |
| sc10001637.1  | 218-S | -32.0063 | -1.81 | Luc7          | NM_025881.1 | Mus musculus Luc7 homolog (S. cerevisiae)-like (Luc7), mRNA.                                                                      |
| sc141368.8.97 | 6-S   | -31.5463 | -1.53 | Trp53         | NM_011640.1 | Mus musculus transformation related protein 53 (Trp53), mRNA.                                                                     |
| sc10001821.1  | 0-S   | -31.513  | -5.75 | Ppp1r2        | NM_025800   | Mus musculus protein phosphatase 1, regulatory (inhibitor) subunit 2 (Ppp1r2), mRNA.                                              |
| sc10227292.12 | 53-S  | -31.4678 | -1.76 | Ctdsp1        | NM_153088.1 | Mus musculus CTD (carboxy-terminal domain, RNA polymerase II, polypeptide A) small phosphatase 1 (Ctdsp1), mRNA.                  |
| sc144304.18   | 267-S | -31.4666 | -1.52 | Gtppb4        | NM_027000.2 | Mus musculus GTP binding protein 4 (Gtppb4), mRNA.                                                                                |
| sc137876.12   | 7-S   | -31.3934 | -2.32 | Sirt1         | NM_019812.1 | Mus musculus sirtuin 1 ((silent mating type information regulation 2, homolog) 1 (S. cerevisiae) (Sirt1), mRNA.                   |
| sc10018938.1  | 81-S  | -31.2921 | -1.59 | Ppp1r14b      | NM_008889.1 | Mus musculus protein phosphatase 1, regulatory (inhibitor) subunit 14B (Ppp1r14b), mRNA.                                          |
| sc1074255.2   | 27-S  | -31.1574 | -1.4  | Smu1          | NM_021535.2 |                                                                                                                                   |
| sc139693.17   | 117-S | -31.0403 | -1.95 | Myst2         | NM_177619.2 | Mus musculus MYST histone acetyltransferase 2 (Myst2), mRNA.                                                                      |
| sc10002638.1  | 12-S  | -31.0365 | -8.72 | Sdhb          | NM_023374.3 | Mus musculus succinate dehydrogenase complex, subunit B, iron sulfur (lp) (Sdhb), mRNA.                                           |
| sc1068020.5   | 23-S  | -30.9953 | -1.95 | 2810002N01Rik | NM_026511.1 | Mus musculus RIKEN cDNA 2810002N01 gene (2810002N01Rik), mRNA.                                                                    |
| sc1020703.2   | 0-S   | -30.9855 | -1.57 | Serpina1d     | NM_009246.1 | Mus musculus serine (or cysteine) proteinase inhibitor, clade A, member 1d (Serpina1d), mRNA.                                     |
| sc10246707.2  | 7-S   | -30.9551 | -2.3  | Emilin2       | NM_145158   | Mus musculus elastin microfibril interfacer 2 (Emilin2), mRNA.                                                                    |
| sc10170741.3  | 61-S  | -30.8981 | -2.21 | Pilrb         | NM_133209.1 | Mus musculus paired immunoglobulin-like type 2 receptor beta (Pilrb), mRNA.                                                       |
| sc1026941.6   | 202-S | -30.8039 | -1.58 | Slc9a3r1      | NM_012030.1 | Mus musculus solute carrier family 9 (sodium/hydrogen exchanger), isoform 3 regulator 1 (Slc9a3r1), mRNA.                         |
| sc1066594.3   | 10-S  | -30.7813 | -1.53 | Uqcr          | NM_025650.1 | Mus musculus ubiquinol-cytochrome c reductase (6.4kD) subunit (Uqcr), mRNA.                                                       |
| sc10026385.2  | 311-S | -30.7583 | -4.99 | Gprk6         | NM_011938.1 | Mus musculus G protein-coupled receptor kinase 6 (Gprk6), mRNA.                                                                   |
| sc137728.2    | 209-S | -30.7254 | -1.88 | Klf16         | NM_078477   | Mus musculus Kruppel-like factor 16 (Klf16), mRNA.                                                                                |
| sc1066480.2   | 3-S   | -30.6462 | -1.47 | Rpl15         | NM_025586.1 | Mus musculus ribosomal protein L15 (Rpl15), mRNA.                                                                                 |
| sc125881.20.1 | 16-S  | -30.6096 | -1.48 | Ars2          | NM_031405.1 | Mus musculus arsenate resistance protein 2 (Ars2), mRNA.                                                                          |
| sc1054673.4   | 1-S   | -30.607  | -1.92 | Sh3glb1       | NM_019464.1 | Mus musculus SH3-domain GRB2-like B1 (endophilin) (Sh3glb1), mRNA.                                                                |
| sc150121.14.1 | 6-S   | -30.3931 | -7.95 | Tulp1         | NM_021478.1 | Mus musculus tubby like protein 1 (Tulp1), mRNA.                                                                                  |
| sc119066.9.1  | 77-S  | -30.3909 | -1.75 | Serping1      | NM_009776   | Mus musculus serine (or cysteine) proteinase inhibitor, clade G, member 1 (Serping1), mRNA.                                       |
| sc150396.10.5 | 23-S  | -30.31   | -1.79 | Msh6          | NM_010830.1 | Mus musculus mutS homolog 6 (E. coli) (Msh6), mRNA.                                                                               |
| sc143927.8    | 10-S  | -30.2729 | -1.72 | Lman2         | NM_025828.2 | Mus musculus lectin, mannose-binding 2 (Lman2), mRNA.                                                                             |
| sc1022142.1   | 236-S | -30.222  | -1.5  | Tuba1         | NM_011653   | Mus musculus tubulin, alpha 1 (Tuba1), mRNA.                                                                                      |
| sc10073834.1  | 147-S | -30.106  | -2.64 | Atp6v1d       | NM_023721.1 | Mus musculus ATPase, H+ transporting, V1 subunit D (Atp6v1d), mRNA.                                                               |
| sc10230908.3  | 49-S  | -30.0652 | -4.78 | Tardbp        | NM_145556.2 | Mus musculus TAR DNA binding protein (Tardbp), mRNA.                                                                              |
| sc132205.4    | 514-S | -29.9759 | -4.8  | Rpl27a        | NM_011975.2 | Mus musculus ribosomal protein L27a (Rpl27a), mRNA.                                                                               |
| sc100228359.2 | 35-S  | -29.952  | -1.85 | Arhgap1       | NM_146124.2 | Mus musculus Rho GTPase activating protein 1 (Arhgap1), mRNA.                                                                     |
| sc10022680.1  | 25-S  | -29.9491 | -1.65 | Zfp207        | NM_011751.1 | Mus musculus zinc finger protein 207 (Zfp207), mRNA.                                                                              |
| sc123378.7    | 207-S | -29.8932 | -2.21 | Car2          | NM_009801.3 | Mus musculus carbonic anhydrase 2 (Car2), mRNA.                                                                                   |
| sc1068713.2   | 9-S   | -29.8622 | -1.52 | Ifitm1        | NM_026820   | Mus musculus interferon induced transmembrane protein 1 (Ifitm1), mRNA.                                                           |
| sc131451.11.1 | 40-S  | -29.7954 | -1.92 | Ccne1         | NM_007633.1 | Mus musculus cyclin E1 (Ccne1), mRNA.                                                                                             |
| sc10237107.1  | 138-S | -29.7743 | -2.04 | BC020354      | NM_198110.1 | Mus musculus cDNA sequence BC020354 (BC020354), mRNA.                                                                             |
| sc10026992.2  | 59-S  | -29.7365 | -1.54 | Brd7          | NM_012047.1 | Mus musculus bromodomain containing 7 (Brd7), mRNA.                                                                               |
| sc120329.42.1 | 43-S  | -29.7065 | -1.46 | Ascc3l1       | NM_177214.3 |                                                                                                                                   |
| sc10001506.1  | 275-S | -29.6958 | -1.81 | AA536749      | NM_012027.1 | Mus musculus expressed sequence AA536749 (AA536749), mRNA.                                                                        |
| sc129532.7.1  | 114-S | -29.6736 | -2.52 | 3110037K17Rik | NM_153197.1 | Mus musculus RIKEN cDNA 3110037K17 gene (3110037K17Rik), mRNA.                                                                    |
| sc149909.9.1  | 16-S  | -29.6648 | -1.5  | 2610528M18Rik | NM_031863.1 | Mus musculus RIKEN cDNA 2610528M18 gene (2610528M18Rik), mRNA.                                                                    |
| sc1016971.1   | 277-S | -29.6504 | -1.95 | Lrp1          | NM_008512.1 | Mus musculus low density lipoprotein receptor-related protein 1 (Lrp1), mRNA.                                                     |
| sc124360.4    | 30-S  | -29.5717 | -1.75 | Hemgn         | NM_053149.1 | Mus musculus hemogen (Hemgn), mRNA.                                                                                               |
| sc148203.8.22 | 30-S  | -29.5529 | -2.84 | Donson        | NM_021720.1 | Mus musculus downstream neighbor of SON (Donson), mRNA.                                                                           |
| sc1014693.1   | 109-S | -29.4864 | -1.43 | Gnb2          | NM_010312.3 | Mus musculus guanine nucleotide binding protein, beta 2 (Gnb2), mRNA.                                                             |
| sc1000275.1   | 39-S  | -29.3752 | -1.39 | 3010033P07Rik | NM_029767.1 | Mus musculus RIKEN cDNA 3010033P07 gene (3010033P07Rik), mRNA.                                                                    |
| sc10003360.1  | 0-S   | -29.2457 | -3.01 | Smox          | NM_145533.1 | Mus musculus spermine oxidase (Smox), mRNA.                                                                                       |
| sc1057808.2   | 82-S  | -29.1598 | -1.6  | Rpl35a        | NM_021338.2 | Mus musculus ribosomal protein L35a (Rpl35a), mRNA.                                                                               |
| sc10001252.1  | 65-S  | -29.0694 | -1.67 | Hnrpa2b1      | NM_016806   | Mus musculus heterogeneous nuclear ribonucleoprotein A2/B1 (Hnrpa2b1), transcript variant 2, mRNA.                                |
| sc10001188.1  | 5-S   | -29.0296 | -2.42 | 1810046I24Rik | NM_027218.1 | Mus musculus RIKEN cDNA 1810046I24 gene (1810046I24Rik), mRNA.                                                                    |
| sc1000781.1   | 68-S  | -29.0107 | -1.75 | Kif21b        | NM_019962.2 | Mus musculus kinesin family member 21B (Kif21b), mRNA.                                                                            |
| sc10003800.1  | 141-S | -28.9979 | -1.58 | Tfam          | NM_009360.2 | Mus musculus transcription factor A, mitochondrial (Tfam), mRNA.                                                                  |
| sc150031.6.1  | 11-S  | -28.9742 | -3.24 | Slc39a7       | NM_008202.1 | Mus musculus solute carrier family 39 (zinc transporter), member 7 (Slc39a7), mRNA.                                               |
| sc121129.4    | 153-S | -28.8754 | -6.62 | Mrps2         | NM_080452.2 | Mus musculus mitochondrial ribosomal protein S2 (Mrps2), mRNA.                                                                    |
| sc154681.4    | 59-S  | -28.8637 | -1.4  | Sh3bgrl       | NM_019989.2 | Mus musculus SH3-binding domain glutamic acid-rich protein like (Sh3bgrl), mRNA.                                                  |
| sc150794.7.1  | 43-S  | -28.8403 | -1.35 | Clic1         | NM_033444.1 | Mus musculus chloride intracellular channel 1 (Clic1), mRNA.                                                                      |

|                |       |          |        |               |             |                                                                                           |
|----------------|-------|----------|--------|---------------|-------------|-------------------------------------------------------------------------------------------|
| sci22797.19    | 196-S | -28.8275 | -1.38  | D3Jfr1        | NM_144901.2 | Mus musculus DNA segment, Chr 3, MJeffers 1 (D3Jfr1), mRNA.                               |
| sci0224619.1   | 310-S | -28.7009 | -1.43  | Traf7         | NM_153792.1 |                                                                                           |
| sci0276770.1   | 104-S | -28.6391 | -1.76  | Eif5a         | NM_181582.2 | Mus musculus eukaryotic translation initiation factor 5A (Eif5a), mRNA.                   |
| sci0013211.2   | 49-S  | -28.5963 | -2.17  | Dhx9          | NM_007842.1 | Mus musculus DEAH (Asp-Glu-Ala-His) box polypeptide 9 (Dhx9), mRNA.                       |
| sci0004133.1   | 1-S   | -28.4513 | -2.02  | Tyms          | NM_021288.2 | Mus musculus thymidylate synthase (Tyms), mRNA.                                           |
| sci0002467.1   | 77-S  | -28.3946 | -1.65  | Bzrp          | NM_009775.2 | Mus musculus benzodiazepine receptor, peripheral (Bzrp), mRNA.                            |
| sci0080912.2   | 313-S | -28.34   | -4.07  | Pum1          | NM_030722.1 | Mus musculus pumilio 1 (Drosophila) (Pum1), mRNA.                                         |
| sci020655.4    | 35-S  | -28.3255 | -1.49  | Sod1          | NM_011434.1 | Mus musculus superoxide dismutase 1, soluble (Sod1), mRNA.                                |
| sci41510.8.35  | 73-S  | -28.2744 | -1.49  | Butr1         | NM_138678.1 | Mus musculus butyrophilin related 1 (Butr1), mRNA.                                        |
| sci0070396.1   | 30-S  | -28.1729 | -2.52  | 2210409M21Rik | NM_133728.2 | Mus musculus RIKEN cDNA 2210409M21 gene (2210409M21Rik), mRNA.                            |
| sci43644.9.1   | 5-S   | -28.1656 | -2.1   | Hexb          | NM_010422.1 | Mus musculus hexosaminidase B (Hexb), mRNA.                                               |
| sci0016069.1   | 4-S   | -28.0362 | -2.69  | Igj           | NM_152839.1 | Mus musculus immunoglobulin joining chain (Igj), mRNA.                                    |
| sci00231464.2  | 19-S  | -27.9636 | -1.79  | Cnot6l        | NM_144910.1 |                                                                                           |
| sci28749.2.254 | 68-S  | -27.9602 | -1.58  | Pcbp1         | NM_011865.2 | Mus musculus poly(rC) binding protein 1 (Pcbp1), mRNA.                                    |
| sci26219.29    | 122-S | -27.9308 | -1.91  | Ulk1          | NM_009469.3 | Mus musculus Unc-51 like kinase 1 (C. elegans) (Ulk1), mRNA.                              |
| sci30883.9.1   | 56-S  | -27.925  | -10.42 | Arfp2         | NM_029802.2 | Mus musculus ADP-ribosylation factor interacting protein 2 (Arfp2), mRNA.                 |
| sci0068045.1   | 0-S   | -27.8331 | -9.86  | 2700060E02Rik | NM_026528.1 | Mus musculus RIKEN cDNA 2700060E02 gene (2700060E02Rik), mRNA.                            |
| sci0066881.2   | 144-S | -27.8292 | -1.78  | Pcyox1        | NM_025823.3 | Mus musculus prenylcysteine oxidase 1 (Pcyox1), mRNA.                                     |
| sci46932.19    | 335-S | -27.8085 | -1.31  | Rangap1       | NM_011241   | Mus musculus RAN GTPase activating protein 1 (Rangap1), mRNA.                             |
| sci0210106.1   | 119-S | -27.8    | -2.24  | Pols          | NM_198600.1 | Mus musculus polymerase (DNA directed) sigma (Pols), mRNA.                                |
| sci29171.13.1  | 11-S  | -27.7409 | -6.3   | Chchd3        | NM_025336.1 | Mus musculus coiled-coil-helix-coiled-coil-helix domain containing 3 (Chchd3), mRNA.      |
| sci012260.3    | 14-S  | -27.738  | -1.79  | C1qb          | NM_009777.1 | Mus musculus complement component 1, q subcomponent, beta polypeptide (C1qb), mRNA.       |
| sci0054632.2   | 248-S | -27.6468 | -3.13  | Ftsj          | NM_133991.2 |                                                                                           |
| sci067201.1    | 106-S | -27.64   | -2.74  | 2700085E05Rik | NM_026029.1 | Mus musculus RIKEN cDNA 2700085E05 gene (2700085E05Rik), mRNA.                            |
| sci20876.12.1  | 41-S  | -27.5365 | -2.17  | Tank          | NM_011529.1 | Mus musculus TRAF family member-associated NF-kappa B activator (Tank), mRNA.             |
| sci0072544.1   | 107-S | -27.3815 | -1.89  | Exosc6        | NM_028274.1 | Mus musculus exosome component 6 (Exosc6), mRNA.                                          |
| sci44866.7.1   | 13-S  | -27.3359 | -9.39  | Pak1ip1       | NM_026550.1 | Mus musculus PAK1 interacting protein 1 (Pak1ip1), mRNA.                                  |
| sci32110.5.1   | 11-S  | -27.3088 | -13.51 | 0610012D09Rik | NM_021554.2 | Mus musculus RIKEN cDNA 0610012D09 gene (0610012D09Rik), mRNA.                            |
| sci20194.20.1  | 79-S  | -27.2948 | -2.18  | Sec23b        | NM_019787.2 | Mus musculus SEC23B (S. cerevisiae) (Sec23b), mRNA.                                       |
| sci19560.8.1   | 32-S  | -27.2895 | -10.54 | 1700013L23Rik | XM_130127.3 | Mus musculus RIKEN cDNA 1700013L23 gene (1700013L23Rik), mRNA.                            |
| sci017283.2    | 24-S  | -27.2169 | -2.24  | Men1          | NM_008583.1 | Mus musculus multiple endocrine neoplasia 1 (Men1), mRNA.                                 |
| sci071846.4    | 6-S   | -27.2111 | -7.96  | 1700013H19Rik | NM_027954.1 | Mus musculus RIKEN cDNA 1700013H19 gene (1700013H19Rik), mRNA.                            |
| sci012988.1    | 164-S | -27.1934 | -1.33  | Csk           | NM_007783.2 | Mus musculus c-src tyrosine kinase (Csk), mRNA.                                           |
| sci30629.5.1   | 26-S  | -27.1289 | -1.88  | Vkorc1        | NM_178600.2 | Mus musculus vitamin K epoxide reductase complex, subunit 1 (Vkorc1), mRNA.               |
| sci00224133.1  | 32-S  | -27.0649 | -3.5   | Parp14        | NM_145481.1 |                                                                                           |
| sci38737.14.1  | 60-S  | -27.055  | -1.57  | Itgb2         | NM_008404.1 | Mus musculus integrin beta 2 (Itgb2), mRNA.                                               |
| sci0002609.1   | 52-S  | -27.0337 | -1.94  | Psmb2         | NM_011970.2 | Mus musculus proteasome (prosome, macropain) subunit, beta type 2 (Psmb2), mRNA.          |
| sci50308.28    | 413-S | -27.0123 | -3.35  | Map3k4        | NM_011948.1 | Mus musculus mitogen activated protein kinase kinase kinase 4 (Map3k4), mRNA.             |
| sci056330.3    | 4-S   | -26.9969 | -1.38  | Pdcd5         | NM_019746.2 | Mus musculus programmed cell death 5 (Pdcd5), mRNA.                                       |
| sci24829.3     | 156-S | -26.9927 | -1.99  | Cnr2          | NM_009924   | Mus musculus cannabinoid receptor 2 (macrophage) (Cnr2), mRNA.                            |
| sci070356.1    | 235-S | -26.9666 | -1.6   | St13          | NM_133726.1 | Mus musculus suppression of tumorigenicity 13 (St13), mRNA.                               |
| sci46751.13    | 99-S  | -26.944  | -1.54  | Prkag1        | NM_016781   | Mus musculus protein kinase, AMP-activated, gamma 1 non-catalytic subunit (Prkag1), mRNA. |
| sci41258.12    | 129-S | -26.8686 | -1.61  | Pitpn         | NM_008850.1 | Mus musculus phosphatidylinositol transfer protein (Pitpn), mRNA.                         |
| sci34300.16.8  | 59-S  | -26.868  | -1.8   | Kars          | NM_053092.1 | Mus musculus lysyl-tRNA synthetase (Kars), mRNA.                                          |
| sci023833.2    | 2-S   | -26.7944 | -1.73  | Cd52          | NM_013706   | Mus musculus CD52 antigen (Cd52), mRNA.                                                   |
| sci0018458.1   | 6-S   | -26.7722 | -2.87  | Pabpc1        | NM_008774.2 | Mus musculus poly A binding protein, cytoplasmic 1 (Pabpc1), mRNA.                        |
| sci41542.4     | 321-S | -26.7428 | -1.43  | Gm2a          | NM_010299.2 | Mus musculus GM2 ganglioside activator protein (Gm2a), mRNA.                              |
| sci48097.14    | 64-S  | -26.5269 | -13.23 | 1110020G09Rik | XM_127934.4 | Mus musculus RIKEN cDNA 1110020G09 gene (1110020G09Rik), mRNA.                            |
| sci43929.4.1   | 16-S  | -26.4334 | -8.12  | Mxd3          | NM_016662.2 |                                                                                           |
| sci47395.9.8   | 1-S   | -26.3691 | -1.43  | 1110064N10Rik | NM_026396.2 | Mus musculus RIKEN cDNA 1110064N10 gene (1110064N10Rik), mRNA.                            |
| sci36472.2.242 | 20-S  | -26.3647 | -1.38  | Gpx1          | NM_008160.1 | Mus musculus glutathione peroxidase 1 (Gpx1), mRNA.                                       |
| sci41758.26.1  | 24-S  | -26.3626 | -1.85  | Pnpt1         | NM_027869.1 | Mus musculus polyribonucleotide nucleotidyltransferase 1 (Pnpt1), mRNA.                   |
| sci24791.10    | 1-S   | -26.2892 | -1.4   | Ddost         | NM_007838.2 | Mus musculus dolichyl-di-phosphooligosaccharide-protein glycoltransferase (Ddost), mRNA.  |
| sci53624.9     | 65-S  | -26.2464 | -6.62  | Syap1         | NM_025932.1 | Mus musculus synapse associated protein 1 (Syap1), mRNA.                                  |
| sci0004022.1   | 70-S  | -26.2381 | -1.4   | Arcp1b        | NM_023142.1 | Mus musculus actin related protein 2/3 complex, subunit 1B (Arcp1b), mRNA.                |
| sci0055486.2   | 3-S   | -26.1844 | -8.84  | Ap3m1         | NM_018829.2 | Mus musculus adaptor-related protein complex 3, mu 1 subunit (Ap3m1), mRNA.               |

|                      |          |        |               |             |                                                                                                         |
|----------------------|----------|--------|---------------|-------------|---------------------------------------------------------------------------------------------------------|
| scl0002144.1 169-S   | -26.1505 | -2.58  | 0610031J06Rik | NM_020003.1 | Mus musculus RIKEN cDNA 0610031J06 gene (0610031J06Rik), mRNA.                                          |
| scl27616.6 187-S     | -26.0997 | -1.85  | Dck           | NM_007832.3 | Mus musculus deoxycytidine kinase (Dck), mRNA.                                                          |
| scl012491.1 51-S     | -25.9922 | -2.24  | Cd36          | NM_007643.2 | Mus musculus CD36 antigen (Cd36), mRNA.                                                                 |
| scl50784.3.81 39-S   | -25.97   | -1.75  | Ltb           | NM_008518.1 | Mus musculus lymphotoxin B (Ltb), mRNA.                                                                 |
| scl25953.10 428-S    | -25.9584 | -2.87  | Wbscr16       | NM_033572.1 | Mus musculus Williams-Beuren syndrome chromosome region 16 homolog (human) (Wbscr16), mRNA.             |
| scl42750.13 363-S    | -25.9437 | -1.76  | Tnfaip2       | NM_009396.1 | Mus musculus tumor necrosis factor, alpha-induced protein 2 (Tnfaip2), mRNA.                            |
| scl49241.6 310-S     | -25.9025 | -3.34  | 3110001H15Rik | NM_027355.1 | Mus musculus RIKEN cDNA 3110001H15 gene (3110001H15Rik), mRNA.                                          |
| scl38867.11 23-S     | -25.861  | -1.44  | Sara1         | NM_009120.1 | Mus musculus SARA1a gene homolog 1 (S. cerevisiae) (Sara1), mRNA.                                       |
| scl0192170.3 20-S    | -25.8327 | -1.42  | Ddx48         | NM_138669.1 | Mus musculus DEAD (Asp-Glu-Ala-Asp) box polypeptide 48 (Ddx48), mRNA.                                   |
| scl39350.4.1 193-S   | -25.7567 | -3.53  | Igsf7         | XM_126696.1 | Mus musculus immunoglobulin superfamily, member 7 (Igsf7), mRNA.                                        |
| scl0022185.2 118-S   | -25.7391 | -1.51  | U2af2         | NM_133671.1 | Mus musculus U2 small nuclear ribonucleoprotein auxiliary factor (U2AF) 2 (U2af2), mRNA.                |
| scl41083.21 226-S    | -25.7273 | -6.56  | Mtmr4         | NM_133215.1 | Mus musculus myotubularin related protein 4 (Mtmr4), mRNA.                                              |
| scl21793.3 27-S      | -25.6398 | -2.01  | Bcl9          | XM_358351.1 | Mus musculus B-cell CLL/lymphoma 9 (Bcl9), mRNA.                                                        |
| scl072195.1 127-S    | -25.6109 | -3.84  | 2610524B01Rik | XM_355594   | Mus musculus RIKEN cDNA 2610524B01 gene (2610524B01Rik), mRNA.                                          |
| scl000538.1 65-S     | -25.6082 | -1.56  | Banf1         | NM_011793.2 | Mus musculus barrier to autointegration factor 1 (Banf1), mRNA.                                         |
| scl068544.3 98-S     | -25.5596 | -1.36  | 2310036O22Rik | NM_026760.1 |                                                                                                         |
| scl067219.1 81-S     | -25.5307 | -1.85  | 2810046C01Rik | NM_026039.2 | Mus musculus RIKEN cDNA 2810046C01 gene (2810046C01Rik), mRNA.                                          |
| scl53554.5.129 30-S  | -25.495  | -1.8   | Bad           | NM_007522.1 | Mus musculus Bcl-associated death promoter (Bad), mRNA.                                                 |
| scl0001292.1 30-S    | -25.4033 | -1.52  | Snrp116       | NM_011431.2 | Mus musculus U5 small nuclear ribonucleoprotein (Snrp116), mRNA.                                        |
| scl050931.2 70-S     | -25.3978 | -2.94  | Il27ra        | NM_016671.2 | Mus musculus interleukin 27 receptor, alpha (Il27ra), mRNA.                                             |
| scl35812.9 1-S       | -25.3903 | -11.14 | Tm4sf8        | NM_019793.2 | Mus musculus transmembrane 4 superfamily member 8 (Tm4sf8), mRNA.                                       |
| scl0001554.1 4-S     | -25.3867 | -1.77  | Tk1           | NM_009387   | Mus musculus thymidine kinase 1 (Tk1), mRNA.                                                            |
| scl36473.24.9 6-S    | -25.294  | -1.44  | Usp4          | NM_011678.1 | Mus musculus ubiquitin specific protease 4 (proto-oncogene) (Usp4), mRNA.                               |
| scl0023881.1 86-S    | -25.2746 | -1.31  | E430034L04Rik | NM_011816.2 | Mus musculus RIKEN cDNA E430034L04 gene (E430034L04Rik), mRNA.                                          |
| scl25783.3.1 76-S    | -25.2484 | -1.71  | Zfp99         | NM_023322.1 | Mus musculus zinc finger protein 99 (Zfp99), mRNA.                                                      |
| scl0056284.1 41-S    | -25.2358 | -2.09  | Mrp19         | NM_026490.1 | Mus musculus mitochondrial ribosomal protein L19 (Mrp19), mRNA.                                         |
| scl011545.25 15-S    | -25.2334 | -1.42  | Adprt1        | NM_007415.2 | Mus musculus ADP-ribosyltransferase (NAD <sup>+</sup> ; poly (ADP-ribose) polymerase) 1 (Adprt1), mRNA. |
| scl22983.9.9 77-S    | -25.1694 | -2.31  | Scamp3        | NM_011886.1 | Mus musculus secretory carrier membrane protein 3 (Scamp3), mRNA.                                       |
| scl16516.6.1 29-S    | -25.1498 | -1.87  | Pde6d         | NM_008801.2 | Mus musculus phosphodiesterase 6D, cGMP-specific, rod delta (Pde6d), mRNA.                              |
| scl0026900.1 130-S   | -25.091  | -4.23  | Ddx3y         | NM_012008.1 | Mus musculus DEAD (Asp-Glu-Ala-Asp) box polypeptide 3, Y-linked (Ddx3y), mRNA.                          |
| scl44726.4.1 4-S     | -25.0436 | -4.91  | Caml          | NM_007596.1 | Mus musculus calcium modulating ligand (Caml), mRNA.                                                    |
| scl018293.8 37-S     | -24.9078 | -1.36  | Ogdh          | NM_010956.1 | Mus musculus oxoglutarate dehydrogenase (lipoamide) (Ogdh), mRNA.                                       |
| scl50760.8.1 58-S    | -24.8615 | -3.16  | Dhx16         | NM_026987.1 | Mus musculus DEAH (Asp-Glu-Ala-His) box polypeptide 16 (Dhx16), mRNA.                                   |
| scl27971.8.1 8-S     | -24.8523 | -1.8   | Emilin1       | NM_133918.1 | Mus musculus elastin microfibril interfacer 1 (Emilin1), mRNA.                                          |
| scl0076789.1 86-S    | -24.8168 | -1.92  | 2410129H14Rik | NM_175245.2 | Mus musculus RIKEN cDNA 2410129H14 gene (2410129H14Rik), mRNA.                                          |
| scl012521.1 26-S     | -24.7693 | -1.28  | Kai1          | NM_007656.1 | Mus musculus kangai 1 (suppression of tumorigenicity 6, prostate) (Kai1), mRNA.                         |
| scl0066494.2 134-S   | -24.7585 | -1.44  | 2610524G07Rik | NM_025596.4 | Mus musculus RIKEN cDNA 2610524G07 gene (2610524G07Rik), mRNA.                                          |
| scl23903.13 130-S    | -24.7469 | -1.46  | Ermapp        | NM_013848.1 | Mus musculus erythroblast membrane-associated protein (Ermapp), mRNA.                                   |
| scl0056347.2 235-S   | -24.6361 | -1.47  | Eif3s8        | NM_019646.1 | Mus musculus eukaryotic translation initiation factor 3, subunit 8 (Eif3s8), mRNA.                      |
| scl40889.7.141 9-S   | -24.6015 | -1.74  | D11Wsu68e     | NM_026776.3 | Mus musculus DNA segment, Chr 11, Wayne State University 68, expressed (D11Wsu68e), mRNA.               |
| scl0068080.2 0-S     | -24.3212 | -3.8   | D5Erd708e     | NM_024216.1 |                                                                                                         |
| scl21820.14.1 60-S   | -24.2886 | -8.96  | Vps45         | NM_013841.1 | Mus musculus vacuolar protein sorting 45 (yeast) (Vps45), mRNA.                                         |
| scl0240514.1 161-S   | -24.278  | -2.22  | Al842788      | NM_198616.1 |                                                                                                         |
| scl066916.1 19-S     | -24.244  | -4.23  | Ndufb7        | NM_025843.1 | Mus musculus NADH dehydrogenase (ubiquinone) 1 beta subcomplex, 7 (Ndufb7), mRNA.                       |
| scl017527.1 149-S    | -24.2335 | -2.77  | Mpv17         | NM_008622.1 | Mus musculus Mpv17 transgene, kidney disease mutant (Mpv17), mRNA.                                      |
| scl0015598.1 13-S    | -24.1856 | -1.55  | lap           | NM_010490   | Mus musculus intracisternal A particles (lap), mRNA.                                                    |
| scl36846.9.2 23-S    | -24.1819 | -1.74  | Anp32a        | NM_009672.2 | Mus musculus acidic (leucine-rich) nuclear phosphoprotein 32 family, member A (Anp32a), mRNA.           |
| scl47032.21.1 6-S    | -24.1174 | -2.17  | Recq4         | NM_058214.1 | Mus musculus RecQ protein-like 4 (Recq4), mRNA.                                                         |
| scl48261.13.240 30-S | -24.0912 | -1.27  | Cct8          | NM_009840.2 | Mus musculus chaperonin subunit 8 (theta) (Cct8), mRNA.                                                 |
| scl020701.2 3-S      | -24.0819 | -1.47  | Serpina1b     | NM_009244.2 | Mus musculus serine (or cysteine) proteinase inhibitor, clade A, member 1b (Serpina1b), mRNA.           |
| scl24926.6.1 18-S    | -24.0309 | -2.04  | Ak2           | NM_016895.2 | Mus musculus adenylate kinase 2 (Ak2), mRNA.                                                            |
| scl0027374.2 29-S    | -23.9055 | -1.75  | Skb1          | NM_013768.1 | Mus musculus SKB1 homolog (S. pombe) (Skb1), mRNA.                                                      |
| scl0014980.1 39-S    | -23.8868 | -1.47  | H2-L          |             |                                                                                                         |
| scl0224703.1 41-S    | -23.7603 | -1.33  | 9530046H09Rik | NM_145486.2 | Mus musculus RIKEN cDNA 9530046H09 gene (9530046H09Rik), mRNA.                                          |
| scl0018484.1 248-S   | -23.7461 | -3.86  | Pam           | NM_013626.1 | Mus musculus peptidylglycine alpha-amidating monooxygenase (Pam), mRNA.                                 |
| GI_23592945-S        | -23.7212 | -1.38  | Eef1a1        | XM_134967.2 | Mus musculus eukaryotic translation elongation factor 1 alpha 1 (Eef1a1), mRNA.                         |

|                |       |          |        |               |             |                                                                                                                |
|----------------|-------|----------|--------|---------------|-------------|----------------------------------------------------------------------------------------------------------------|
| sci0002486.1   | 42-S  | -23.6826 | -8.56  | Myg1          | NM_021713.1 | Mus musculus melanocyte proliferating gene 1 (Myg1), mRNA.                                                     |
| sci00329958.1  | 84-S  | -23.634  | -1.52  | E2f2          | NM_183301.1 | Mus musculus E2F transcription factor 2 (E2f2), mRNA.                                                          |
| sci52793.9.1   | 8-S   | -23.6098 | -3.17  | Unc93b        | NM_019449.1 | Mus musculus unc-93 homolog B (C. elegans) (Unc93b), mRNA.                                                     |
| sci069072.8    | 1-S   | -23.5618 | -1.44  | Ebna1bp2      | NM_026932.2 | Mus musculus EBNA1 binding protein 2 (Ebna1bp2), mRNA.                                                         |
| sci000251.1    | 1-S   | -23.5004 | -4.87  | Mrpl48        | NM_026971.2 | Mus musculus mitochondrial ribosomal protein L48 (Mrpl48), transcript variant 2, mRNA.                         |
| sci35096.10    | 154-S | -23.4872 | -1.52  | Ankrd10       | NM_133971.1 | Mus musculus ankyrin repeat domain 10 (Ankrd10), mRNA.                                                         |
| sci0002081.1   | 46-S  | -23.4502 | -4.84  | 2500003M10Rik | NM_023215.3 | Mus musculus RIKEN cDNA 2500003M10 gene (2500003M10Rik), mRNA.                                                 |
| sci29628.36    | 98-S  | -23.4079 | -4.75  | Fancd2        | XM_132796.4 | Mus musculus Fanconi anemia, complementation group D2 (Fancd2), mRNA.                                          |
| sci33713.6.1   | 0-S   | -23.3895 | -1.56  | Lsm4          | NM_015816.1 | Mus musculus LSM4 homolog, U6 small nuclear RNA associated (S. cerevisiae) (Lsm4), mRNA.                       |
| sci54227.4     | 188-S | -23.3761 | -2.59  | Tmem32        | NM_146234.2 |                                                                                                                |
| sci0016423.1   | 78-S  | -23.3587 | -1.28  | Cd47          | NM_010581.3 | Mus musculus CD47 antigen (Rh-related antigen, integrin-associated signal transducer) (Cd47), mRNA.            |
| sci37797.29    | 0-S   | -23.3151 | -3.57  | Col6a2        | NM_146007.1 | Mus musculus procollagen, type VI, alpha 2 (Col6a2), mRNA.                                                     |
| sci013690.1    | 50-S  | -23.2848 | -1.39  | Eif4g2        | NM_013507.2 | Mus musculus eukaryotic translation initiation factor 4, gamma 2 (Eif4g2), mRNA.                               |
| sci38285.22    | 33-S  | -23.2782 | -8.78  | Stat2         | NM_019963.1 | Mus musculus signal transducer and activator of transcription 2 (Stat2), mRNA.                                 |
| sci0319168.1   | 1-S   | -23.167  | -1.76  | Hist1h2ah     | NM_175659.1 | Mus musculus histone 1, H2ah (Hist1h2ah), mRNA.                                                                |
| sci41340.2.1   | 55-S  | -23.1398 | -2.41  | 1110030J09Rik | NM_025397.2 | Mus musculus RIKEN cDNA 1110030J09 gene (1110030J09Rik), mRNA.                                                 |
| sci0054645.1   | 120-S | -23.1095 | -1.59  | DXlmx47e      | NM_207670.1 | Mus musculus DNA segment, Chr X, Immunex 47, expressed (DXlmx47e), mRNA.                                       |
| sci29514.8.22  | 6-S   | -23.0589 | -1.48  | Mif2          | NM_145385.1 | Mus musculus myeloid leukemia factor 2 (Mif2), mRNA.                                                           |
| sci51350.23.1  | 4-S   | -23.0081 | -1.73  | Fbxo38        | NM_134136.1 |                                                                                                                |
| sci0001713.1   | 7-S   | -22.9974 | -1.48  | Trim10        | NM_011280.1 | Mus musculus tripartite motif protein 10 (Trim10), mRNA.                                                       |
| sci0016179.2   | 78-S  | -22.969  | -2.52  | Irak1         | NM_008363.1 | Mus musculus interleukin-1 receptor-associated kinase 1 (Irak1), mRNA.                                         |
| sci0001607.1   | 37-S  | -22.8989 | -1.51  | 2810410M20Rik | NM_024428   | Mus musculus RIKEN cDNA 2810410M20 gene (2810410M20Rik), mRNA.                                                 |
| sci0020135.2   | 120-S | -22.8985 | -1.69  | Rrm2          | NM_009104.1 | Mus musculus ribonucleotide reductase M2 (Rrm2), mRNA.                                                         |
| sci45489.6.1   | 24-S  | -22.8805 | -10.72 | 2510005D08Rik | NM_026526.1 | Mus musculus RIKEN cDNA 2510005D08 gene (2510005D08Rik), mRNA.                                                 |
| sci0012443.2   | 42-S  | -22.8493 | -3.22  | Ccnd1         | NM_007631.1 | Mus musculus cyclin D1 (Ccnd1), mRNA.                                                                          |
| sci016541.8    | 1-S   | -22.8083 | -1.47  | Napsa         | NM_008437.1 |                                                                                                                |
| sci0003366.1   | 7-S   | -22.7207 | -2.57  | Nusap1        | NM_133851.1 | Mus musculus nucleolar and spindle associated protein 1 (Nusap1), mRNA.                                        |
| sci066923.1    | 197-S | -22.7187 | -1.52  | 2610016F04Rik | NM_025847.1 | Mus musculus RIKEN cDNA 2610016F04 gene (2610016F04Rik), mRNA.                                                 |
| sci051792.12   | 26-S  | -22.6802 | -1.55  | Ppp2r1a       | NM_016891.2 | Mus musculus protein phosphatase 2 (formerly 2A), regulatory subunit A (PR 65), alpha isoform (Ppp2r1a), mRNA. |
| sci34187.26.1  | 95-S  | -22.6624 | -6.21  | Nup133        | NM_172288.1 | Mus musculus nucleoporin 133 (Nup133), mRNA.                                                                   |
| sci0003171.1   | 33-S  | -22.6166 | -1.41  | Psmb7         | NM_011187.1 | Mus musculus proteasome (prosome, macropain) subunit, beta type 7 (Psmb7), mRNA.                               |
| sci0001042.1   | 14-S  | -22.614  | -1.83  | Mips25        | NM_025578.2 | Mus musculus mitochondrial ribosomal protein S25 (Mips25), mRNA.                                               |
| sci38167.5     | 407-S | -22.5588 | -2.09  | 3110003A17Rik | XM_125510.2 | Mus musculus RIKEN cDNA 3110003A17 gene (3110003A17Rik), mRNA.                                                 |
| sci017330.5    | 48-S  | -22.5523 | -1.4   | Minpp1        | NM_010799.1 | Mus musculus multiple inositol polyphosphate histidine phosphatase 1 (Minpp1), mRNA.                           |
| sci34674.6.1   | 40-S  | -22.495  | -1.32  | Pivap         | NM_032398.1 | Mus musculus plasmalemma vesicle associated protein (Pivap), mRNA.                                             |
| sci028019.8    | 226-S | -22.4636 | -8.78  | Ing4          | NM_133345.1 | Mus musculus inhibitor of growth family, member 4 (Ing4), mRNA.                                                |
| sci072201.1    | 290-S | -22.4359 | -1.43  | 2600013N14Rik | NM_152812.1 | Mus musculus RIKEN cDNA 2600013N14 gene (2600013N14Rik), mRNA.                                                 |
| sci40113.4     | 264-S | -22.4218 | -1.77  | Akap10        | NM_019921.2 | Mus musculus A kinase (PRKA) anchor protein 10 (Akap10), mRNA.                                                 |
| sci32275.19.1  | 102-S | -22.4077 | -1.66  | Rrm1          | NM_009103   | Mus musculus ribonucleotide reductase M1 (Rrm1), mRNA.                                                         |
| sci50703.12.1  | 8-S   | -22.4025 | -1.72  | Pla2g7        | NM_013737.2 | Mus musculus phospholipase A2, group VII (platelet-activating factor acetylhydrolase, plasma) (Pla2g7), mRNA.  |
| sci55020.28    | 14-S  | -22.3748 | -1.32  | Ube1x         | NM_009457.2 | Mus musculus ubiquitin-activating enzyme E1, Chr X (Ube1x), mRNA.                                              |
| sci37474.12.36 | 46-S  | -22.3704 | -1.56  | Cct2          | NM_007636.1 | Mus musculus chaperonin subunit 2 (beta) (Cct2), mRNA.                                                         |
| sci0003453.1   | 49-S  | -22.3214 | -6.95  | Snx19         | NM_028874.1 | Mus musculus sorting nexin 19 (Snx19), mRNA.                                                                   |
| sci31959.7.1   | 44-S  | -22.2861 | -1.3   | Bccip         | NM_025392.1 | Mus musculus BRCA2 and CDKN1A interacting protein (Bccip), mRNA.                                               |
| sci0066142.1   | 255-S | -22.2663 | -1.56  | Cox7b         | NM_025379.1 | Mus musculus cytochrome c oxidase subunit VIIb (Cox7b), mRNA.                                                  |
| sci0056304.1   | 278-S | -22.2169 | -1.89  | LOC56304      | NM_019633.1 | Mus musculus recombinant antineuraminidase single chain Ig VH and VL domains (LOC56304), mRNA.                 |
| sci0020842.1   | 84-S  | -22.1982 | -1.53  | Stag1         | NM_009282.2 | Mus musculus stromal antigen 1 (Stag1), mRNA.                                                                  |
| sci0015531.1   | 129-S | -22.1813 | -1.82  | Ndst1         | NM_008306.2 | Mus musculus N-deacetylase/N-sulfotransferase (heparan glucosaminyl) 1 (Ndst1), mRNA.                          |
| sci0070885.2   | 95-S  | -22.1363 | -1.54  | 4921521J11Rik | NM_027590.1 | Mus musculus RIKEN cDNA 4921521J11 gene (4921521J11Rik), mRNA.                                                 |
| sci0004155.1   | 21-S  | -22.1201 | -3.53  | Hip2          | NM_016786.2 | Mus musculus huntingtin interacting protein 2 (Hip2), mRNA.                                                    |
| sci093684.5    | 156-S | -22.0988 | -1.52  | 39340         | NM_053102.1 | Mus musculus selenoprotein (Sep15), mRNA.                                                                      |
| sci0014105.1   | 218-S | -22.0521 | -1.55  | Fusip1        | NM_010178.1 | Mus musculus FUS interacting protein (serine-arginine rich) 1 (Fusip1), mRNA.                                  |
| sci067530.3    | 0-S   | -21.9942 | -1.4   | Uqcrb         | NM_026219.1 | Mus musculus ubiquinol-cytochrome c reductase binding protein (Uqcrb), mRNA.                                   |
| sci0002832.1   | 59-S  | -21.9882 | -2.18  | Ptp4a2        | NM_008974.2 | Mus musculus protein tyrosine phosphatase 4a2 (Ptp4a2), mRNA.                                                  |
| sci51923.8.5   | 28-S  | -21.9679 | -2.02  | Lmnb1         | NM_010721.1 | Mus musculus lamin B1 (Lmnb1), mRNA.                                                                           |
| sci019684.7    | 10-S  | -21.9612 | -1.48  | Rdx           | NM_009041   | Mus musculus radixin (Rdx), mRNA.                                                                              |

|                |       |          |       |               |             |                                                                                                                   |
|----------------|-------|----------|-------|---------------|-------------|-------------------------------------------------------------------------------------------------------------------|
| scl19292.6     | 70-S  | -21.9317 | -1.33 | 0610033I05Rik | NM_030243.2 | Mus musculus RIKEN cDNA 0610033I05 gene (0610033I05Rik), mRNA.                                                    |
| scl0003917.1   | 104-S | -21.931  | -1.32 | Nap111        | NM_015781.2 | Mus musculus nucleosome assembly protein 1-like 1 (Nap111), mRNA.                                                 |
| scl51339.12    | 2-S   | -21.9302 | -1.31 | Fech          | NM_007998.3 | Mus musculus ferrochelatase (Fech), mRNA.                                                                         |
| scl39022.13.1  | 2-S   | -21.923  | -1.32 | Hdac2         | NM_008229.1 | Mus musculus histone deacetylase 2 (Hdac2), mRNA.                                                                 |
| scl36290.7     | 92-S  | -21.9027 | -1.44 | Limd1         | NM_013860.1 | Mus musculus LIM domains containing 1 (Limd1), mRNA.                                                              |
| scl46105.6.1   | 21-S  | -21.8991 | -1.6  | Vdrip         | NM_026119.2 | Mus musculus vitamin D receptor interacting protein (Vdrip), mRNA.                                                |
| scl50915.17    | 55-S  | -21.8509 | -1.31 | Mapk14        | NM_011951   | Mus musculus mitogen activated protein kinase 14 (Mapk14), mRNA.                                                  |
| scl0004148.1   | 17-S  | -21.8079 | -1.49 | Lias          | NM_024471.2 | Mus musculus lipoic acid synthetase (Lias), mRNA.                                                                 |
| scl33261.5     | 41-S  | -21.8052 | -1.41 | Hsbp1         | NM_024219.1 | Mus musculus heat shock factor binding protein 1 (Hsbp1), mRNA.                                                   |
| scl54976.5.1   | 9-S   | -21.7905 | -1.41 | Mcts1         | NM_026902.1 | Mus musculus malignant T cell amplified sequence 1 (Mcts1), mRNA.                                                 |
| scl0067239.2   | 94-S  | -21.7851 | -1.81 | Bxdc1         | NM_023323.2 | Mus musculus brix domain containing 1 (Bxdc1), mRNA.                                                              |
| scl50638.6.1   | 30-S  | -21.764  | -1.77 | Trem4         | NM_172623.1 |                                                                                                                   |
| scl0014423.1   | 138-S | -21.7609 | -1.32 | Galnt1        | NM_013814.2 | Mus musculus UDP-N-acetyl-alpha-D-galactosamine:polypeptide N-acetyl(galactosaminyl)transferase 1 (Galnt1), mRNA. |
| scl24426.8     | 231-S | -21.7272 | -1.42 | Wdr40a        | NM_026893.2 |                                                                                                                   |
| scl0072133.2   | 35-S  | -21.7259 | -8.21 | 2610009I02Rik | NM_028115.2 | Mus musculus RIKEN cDNA 2610009I02 gene (2610009I02Rik), mRNA.                                                    |
| scl28407.7.1   | 0-S   | -21.7139 | -2.06 | LOC213233     | NM_145391.1 | Mus musculus similar to hypothetical protein FLJ10143 (LOC213233), mRNA.                                          |
| scl0022927.1   | 231-S | -21.6709 | -3.55 | D630029K19Rik | NM_172680.2 | Mus musculus RIKEN cDNA D630029K19 gene (D630029K19Rik), mRNA.                                                    |
| scl00394432.2  | 137-S | -21.6133 | -2.12 | Ugt1a10       | NM_201642   |                                                                                                                   |
| scl00229541.2  | 280-S | -21.5726 | -5.45 | BC026996      | NM_201407.1 | Mus musculus cDNA sequence BC026996 (BC026996), mRNA.                                                             |
| scl050917.1    | 181-S | -21.4537 | -7.06 | Galns         | NM_016722   | Mus musculus galactosamine (N-acetyl)-6-sulfate sulfatase (Galns), mRNA.                                          |
| scl00117198.2  | 233-S | -21.4307 | -2.57 | lns1abp       | NM_028582.2 | Mus musculus influenza virus NS1A binding protein (lns1abp), mRNA.                                                |
| scl0004120.1   | 356-S | -21.394  | -1.95 | Orc5l         | NM_011959.1 | Mus musculus origin recognition complex, subunit 5-like (S. cerevisiae) (Orc5l), mRNA.                            |
| scl00231327.1  | 147-S | -21.3731 | -1.73 | Ppat          | NM_172146.1 | Mus musculus phosphoribosyl pyrophosphate amidotransferase (Ppat), mRNA.                                          |
| scl25228.16    | 571-S | -21.3347 | -8.46 | A430091O22Rik | NM_183024.1 | Mus musculus RIKEN cDNA A430091O22 gene (A430091O22Rik), mRNA.                                                    |
| scl0002780.1   | 2-S   | -21.3272 | -1.89 | Exosc10       | NM_016699.1 |                                                                                                                   |
| scl0020438.2   | 182-S | -21.2947 | -2.28 | Siah1b        | NM_009173.1 | Mus musculus seven in absentia 1B (Siah1b), mRNA.                                                                 |
| scl0002777.1   | 339-S | -21.2524 | -1.48 | Ak2           | NM_016895.2 | Mus musculus adenylate kinase 2 (Ak2), mRNA.                                                                      |
| scl0071078.2   | 199-S | -21.2124 | -6.01 | Adam30        | NM_027665.1 | Mus musculus a disintegrin and metalloproteinase domain 30 (Adam30), mRNA.                                        |
| scl52691.13    | 82-S  | -21.2092 | -1.54 | Psat1         | XM_129211.2 | Mus musculus phosphoserine aminotransferase 1 (Psat1), mRNA.                                                      |
| scl17725.6     | 585-S | -21.2065 | -1.37 | Itm2c         | NM_022417.1 | Mus musculus integral membrane protein 2C (Itm2c), mRNA.                                                          |
| scl40751.1     | 9-S   | -21.1835 | -1.37 | Rpl38         | NM_023372.1 | Mus musculus ribosomal protein L38 (Rpl38), mRNA.                                                                 |
| scl066496.2    | 57-S  | -21.176  | -8.88 | 2700038C09Rik | NM_025598.1 | Mus musculus RIKEN cDNA 2700038C09 gene (2700038C09Rik), mRNA.                                                    |
| scl0001589.1   | 43-S  | -21.1603 | -6.22 | A1415282      | NM_134021.1 | Mus musculus expressed sequence A1415282 (A1415282), mRNA.                                                        |
| scl49610.9.216 | 11-S  | -21.0517 | -1.68 | Fez2          | NM_199448.1 | Mus musculus fasciculation and elongation protein zeta 2 (zyglin II) (Fez2), mRNA.                                |
| scl24617.16.29 | 1-S   | -21.0316 | -2.65 | Cdc212        | NM_007661.2 |                                                                                                                   |
| scl39991.5     | 43-S  | -21.0184 | -7.56 | Spag7         | NM_172561   | Mus musculus sperm associated antigen 7 (Spag7), mRNA.                                                            |
| scl0003429.1   | 37-S  | -20.9623 | -1.49 | Hmbs          | NM_013551   | Mus musculus hydroxymethylbilane synthase (Hmbs), mRNA.                                                           |
| scl056378.6    | 20-S  | -20.9435 | -1.37 | Arpc3         | NM_019824.2 | Mus musculus actin related protein 2/3 complex, subunit 3 (Arpc3), mRNA.                                          |
| scl30825.22    | 142-S | -20.8977 | -1.43 | Rab6ip1       | NM_021494.1 | Mus musculus Rab6 interacting protein 1 (Rab6ip1), mRNA.                                                          |
| scl42032.3     | 211-S | -20.8475 | -3.33 | Bag5          | XM_127149.3 | Mus musculus BCL2-associated athanogene 5 (Bag5), mRNA.                                                           |
| scl41463.6     | 233-S | -20.785  | -4.96 | Grap          | NM_027817.1 | Mus musculus GRB2-related adaptor protein (Grap), mRNA.                                                           |
| scl32695.9.13  | 0-S   | -20.784  | -5.68 | Nosip         | NM_025533.1 | Mus musculus nitric oxide synthase interacting protein (Nosip), mRNA.                                             |
| scl000319.1    | 7-S   | -20.774  | -9.15 | Acin1         | NM_019567.1 | Mus musculus apoptotic chromatin condensation inducer 1 (Acin1), mRNA.                                            |
| scl012417.4    | 32-S  | -20.7504 | -1.38 | Cbx3          | NM_007624   | Mus musculus chromobox homolog 3 (Drosophila HP1 gamma) (Cbx3), mRNA.                                             |
| scl068299.1    | 68-S  | -20.7177 | -6.45 | 3100002B05Rik | NM_026664.2 | Mus musculus RIKEN cDNA 3100002B05 gene (3100002B05Rik), mRNA.                                                    |
| scl53398.18.1  | 7-S   | -20.7111 | -5.55 | Ganab         | NM_008060.1 |                                                                                                                   |
| scl36121.3     | 28-S  | -20.6917 | -1.34 | 1110011K10Rik | NM_170777.3 | Mus musculus RIKEN cDNA 1110011K10 gene (1110011K10Rik), mRNA.                                                    |
| scl0020658.1   | 193-S | -20.6127 | -3.03 | Son           | NM_178880.3 | Mus musculus Son cell proliferation protein (Son), transcript variant 1, mRNA.                                    |
| scl18851.3     | 427-S | -20.5761 | -5.59 | 6430601A21Rik | NM_175466.2 | Mus musculus RIKEN cDNA 6430601A21 gene (6430601A21Rik), mRNA.                                                    |
| scl31638.15.1  | 106-S | -20.5659 | -3.23 | Pou2f2        | NM_011138.1 | Mus musculus POU domain, class 2, transcription factor 2 (Pou2f2), mRNA.                                          |
| scl39287.25.1  | 2-S   | -20.5623 | -1.43 | Tmc6          | NM_145439.1 | Mus musculus transmembrane channel-like gene family 6 (Tmc6), mRNA.                                               |
| scl0052477.2   | 74-S  | -20.5327 | -1.54 | D1Etd396e     | NM_021421.2 | Mus musculus DNA segment, Chr 1, ERATO Doi 396, expressed (D1Etd396e), mRNA.                                      |
| scl33660.5     | 397-S | -20.5248 | -1.54 | Hmox1         | NM_010442.1 | Mus musculus heme oxygenase (decycling) 1 (Hmox1), mRNA.                                                          |
| scl023825.3    | 146-S | -20.4432 | -1.39 | Banf1         | NM_011793.2 | Mus musculus barrier to autointegration factor 1 (Banf1), mRNA.                                                   |
| scl000884.1    | 198-S | -20.3947 | -6.16 | Kist          | NM_010633.3 | Mus musculus kinase interacting with leukemia-associated gene (stathmin) (Kist), mRNA.                            |
| scl38461.7.1   | 1-S   | -20.349  | -5.14 | Pawr          | XM_125814.2 | Mus musculus PRKC, apoptosis, WT1, regulator (Pawr), mRNA.                                                        |

|                     |          |       |               |             |                                                                                                                            |
|---------------------|----------|-------|---------------|-------------|----------------------------------------------------------------------------------------------------------------------------|
| sci0003661.1_1612-S | -20.3185 | -1.75 | Nedd9         | NM_017464.2 | Mus musculus neural precursor cell expressed, developmentally down-regulated gene 9 (Nedd9), mRNA.                         |
| sci068089.7_12-S    | -20.3061 | -1.32 | Arpc4         | NM_026552   | Mus musculus actin related protein 2/3 complex, subunit 4 (Arpc4), mRNA.                                                   |
| sci40921.6_29-S     | -20.2773 | -1.44 | Igfbp4        | NM_010517.2 | Mus musculus insulin-like growth factor binding protein 4 (Igfbp4), mRNA.                                                  |
| sci0018173.2_296-S  | -20.2249 | -1.39 | Slc11a1       | NM_013612.1 | Mus musculus solute carrier family 11 (proton-coupled divalent metal ion transporters), member 1 (Slc11a1), mRNA.          |
| sci00216760.1_116-S | -20.1964 | -1.65 | Mfap3         | NM_145426.1 |                                                                                                                            |
| sci48911.16.3_18-S  | -20.196  | -2.39 | Usp16         | NM_024258.1 | Mus musculus ubiquitin specific protease 16 (Usp16), mRNA.                                                                 |
| sci0022214.2_142-S  | -20.1429 | -1.27 | Ube2h         | XM_133034.1 | Mus musculus ubiquitin-conjugating enzyme E2H (Ube2h), mRNA.                                                               |
| sci000622.1_13-S    | -20.0981 | -1.76 | Brd7          | NM_012047.1 | Mus musculus bromodomain containing 7 (Brd7), mRNA.                                                                        |
| sci0266692.1_279-S  | -20.0777 | -1.57 | Cpne1         | NM_170590.1 | Mus musculus copine 1 (Cpne1), transcript variant 1, mRNA.                                                                 |
| sci46987.7.1_26-S   | -20.0762 | -1.29 | Rac2          | NM_009008.2 | Mus musculus RAS-related C3 botulinum substrate 2 (Rac2), mRNA.                                                            |
| sci068377.10_23-S   | -20.0647 | -5.12 | Acta2         | NM_007392.2 | Mus musculus RIKEN cDNA 0610041G09 gene (0610041G09Rik), mRNA.                                                             |
| sci00106840.2_67-S  | -20.0451 | -1.73 | AA407659      | NM_175352.2 | Mus musculus expressed sequence AA407659 (AA407659), mRNA.                                                                 |
| sci0002138.1_36-S   | -20.034  | -2.74 | 4833424P18Rik | NM_029017   | Mus musculus RIKEN cDNA 4833424P18 gene (4833424P18Rik), mRNA.                                                             |
| sci000184.1_1-S     | -20.0325 | -5.32 | Sec23ip       | XM_133737.4 | Mus musculus Sec23 interacting protein (Sec23ip), mRNA.                                                                    |
| sci020541.2_143-S   | -20.0294 | -2.2  | Slc8a1        | NM_011406.1 | Mus musculus solute carrier family 8 (sodium/calcium exchanger), member 1 (Slc8a1), mRNA.                                  |
| sci23887.17.1_103-S | -20.0239 | -1.56 | Ctps          | NM_016748.1 | Mus musculus cytidine 5-triphosphate synthase (Ctps), mRNA.                                                                |
| sci51737.13.1_28-S  | -20.0167 | -1.24 | Atp5a1        | NM_007505.1 | Mus musculus ATP synthase, H <sup>+</sup> transporting, mitochondrial F1 complex, alpha subunit, isoform 1 (Atp5a1), mRNA. |

TABLE A4

## GENMAPPS AND GENE ONTOLOGIES SIGNIFICANTLY CHANGED BY THE ATHEROGENIC DIET IN SPLEENS

## UP-REGULATED - GENMAPP

| No. | MAPP Name                     | Number Changed | Number Measured | Number on MAPP | Percent Changed | Percent Present | Z Score | Permuted P Value |
|-----|-------------------------------|----------------|-----------------|----------------|-----------------|-----------------|---------|------------------|
| 1   | Mm_Apoptosis                  | 13             | 83              | 83             | 15.6627         | 100.0000        | 3.5500  | 0.0030           |
| 2   | Mm_TNF-alpha-NF-kB_NetPath_9  | 19             | 166             | 176            | 11.4458         | 94.3182         | 2.7880  | 0.0050           |
| 3   | Mm_B Cell_Receptor_NetPath_12 | 17             | 147             | 150            | 11.5646         | 98.0000         | 2.6780  | 0.0080           |

## UP-REGULATED - GENE ONTOLOGY

| No. | GO Name                                                                                | GO Type | Number Changed | Number Measured | Number in GO | Percent Changed | Percent Present | Z Score | Permuted P Value |
|-----|----------------------------------------------------------------------------------------|---------|----------------|-----------------|--------------|-----------------|-----------------|---------|------------------|
| 1   | nucleosome assembly                                                                    | P       | 14             | 66              | 128          | 21.2121         | 51.5625         | 5.5780  | 0.0000           |
| 2   | organelle organization and biogenesis                                                  | P       | 79             | 842             | 1000         | 9.3824          | 84.2000         | 5.0190  | 0.0000           |
| 3   | RNA processing                                                                         | P       | 38             | 329             | 371          | 11.5502         | 88.6792         | 4.8190  | 0.0000           |
| 4   | protein biosynthesis                                                                   | P       | 58             | 588             | 801          | 9.8639          | 73.4082         | 4.6770  | 0.0000           |
| 5   | cell organization and biogenesis                                                       | P       | 132            | 1659            | 1897         | 7.9566          | 87.4539         | 4.5670  | 0.0000           |
| 6   | DNA packaging                                                                          | P       | 27             | 215             | 291          | 12.5581         | 73.8832         | 4.5310  | 0.0000           |
| 7   | cellular physiological process                                                         | P       | 553            | 8916            | 10403        | 6.2023          | 85.7061         | 4.3510  | 0.0000           |
| 8   | protein metabolism                                                                     | P       | 202            | 2842            | 3423         | 7.1077          | 83.0266         | 4.0660  | 0.0000           |
| 9   | apoptotic program                                                                      | P       | 10             | 56              | 61           | 17.8571         | 91.8033         | 4.0370  | 0.0000           |
| 10  | chromosome organization and biogenesis (sensu Eukaryota)                               | P       | 28             | 251             | 332          | 11.1554         | 75.6024         | 3.9220  | 0.0000           |
| 11  | metabolism                                                                             | P       | 424            | 6705            | 7938         | 6.3236          | 84.4671         | 3.8000  | 0.0000           |
| 12  | RNA splicing                                                                           | P       | 18             | 144             | 167          | 12.5000         | 86.2276         | 3.6690  | 0.0010           |
| 13  | nucleobase\, nucleoside\, nucleotide and nucleic acid metabolism                       | P       | 195            | 2803            | 3355         | 6.9568          | 83.5469         | 3.6440  | 0.0010           |
| 14  | mitosis                                                                                | P       | 16             | 136             | 146          | 11.7647         | 93.1507         | 3.1880  | 0.0010           |
| 15  | pyrimidine deoxyribonucleotide catabolism                                              | P       | 2              | 2               | 2            | 100.0000        | 100.0000        | 5.8400  | 0.0020           |
| 16  | biosynthesis                                                                           | P       | 89             | 1154            | 1428         | 7.7123          | 80.8123         | 3.3600  | 0.0020           |
| 17  | protein transport                                                                      | P       | 49             | 589             | 654          | 8.3192          | 90.0612         | 3.0090  | 0.0020           |
| 18  | protein modification                                                                   | P       | 106            | 1476            | 1665         | 7.1816          | 88.6487         | 2.9060  | 0.0020           |
| 19  | imprinting                                                                             | P       | 3              | 6               | 6            | 50.0000         | 100.0000        | 4.7610  | 0.0030           |
| 20  | intra-Golgi vesicle-mediated transport                                                 | P       | 4              | 11              | 12           | 36.3636         | 91.6667         | 4.4700  | 0.0030           |
| 21  | protein catabolism                                                                     | P       | 20             | 190             | 215          | 10.5263         | 88.3721         | 3.0240  | 0.0040           |
| 22  | valyl-tRNA aminoacylation                                                              | P       | 2              | 2               | 2            | 100.0000        | 100.0000        | 5.8400  | 0.0050           |
| 23  | small GTPase mediated signal transduction                                              | P       | 29             | 305             | 344          | 9.5082          | 88.6628         | 3.0610  | 0.0050           |
| 24  | protein processing                                                                     | P       | 9              | 64              | 72           | 14.0625         | 88.8889         | 2.9870  | 0.0050           |
| 25  | endosome organization and biogenesis                                                   | P       | 3              | 7               | 8            | 42.8571         | 87.5000         | 4.3170  | 0.0060           |
| 26  | mitotic chromosome condensation                                                        | P       | 4              | 14              | 16           | 28.5714         | 87.5000         | 3.7690  | 0.0060           |
| 27  | fatty acid oxidation                                                                   | P       | 6              | 32              | 32           | 18.7500         | 100.0000        | 3.2700  | 0.0060           |
| 28  | ubiquitin-dependent protein catabolism                                                 | P       | 15             | 132             | 149          | 11.3636         | 88.5906         | 2.9380  | 0.0060           |
| 29  | superoxide metabolism                                                                  | P       | 5              | 21              | 22           | 23.8095         | 95.4545         | 3.6620  | 0.0070           |
| 30  | ubiquitin cycle                                                                        | P       | 37             | 437             | 511          | 8.4668          | 85.5186         | 2.7150  | 0.0070           |
| 31  | ribosomal protein import into nucleus                                                  | P       | 2              | 3               | 3            | 66.6667         | 100.0000        | 4.6280  | 0.0090           |
| 32  | ribosome biogenesis and assembly                                                       | P       | 11             | 86              | 105          | 12.7907         | 81.9048         | 2.9480  | 0.0090           |
| 33  | CTD phosphatase activity                                                               | F       | 4              | 6               | 6            | 66.6667         | 100.0000        | 6.5460  | 0.0000           |
| 34  | protein phosphatase type 2C activity                                                   | F       | 4              | 9               | 10           | 44.4444         | 90.0000         | 5.1030  | 0.0000           |
| 35  | binding                                                                                | F       | 567            | 9101            | 10565        | 6.2301          | 86.1429         | 4.6550  | 0.0000           |
| 36  | protein binding                                                                        | F       | 310            | 4715            | 5185         | 6.5748          | 90.9354         | 3.7660  | 0.0000           |
| 37  | oxidoreductase activity\, acting on paired donors\, with oxidation of a pair of donors | F       | 4              | 9               | 10           | 44.4444         | 90.0000         | 5.1030  | 0.0010           |
| 38  | inositol or phosphatidylinositol kinase activity                                       | F       | 7              | 29              | 33           | 24.1379         | 87.8788         | 4.3820  | 0.0010           |
| 39  | enzyme activator activity                                                              | F       | 20             | 180             | 199          | 11.1111         | 90.4523         | 3.2870  | 0.0010           |
| 40  | translation release factor activity\, codon specific                                   | F       | 2              | 3               | 3            | 66.6667         | 100.0000        | 4.6280  | 0.0020           |
| 41  | translation initiation factor activity                                                 | F       | 10             | 66              | 86           | 15.1515         | 76.7442         | 3.4210  | 0.0020           |
| 42  | RNA binding                                                                            | F       | 41             | 466             | 548          | 8.7983          | 85.0365         | 3.1240  | 0.0020           |
| 43  | myosin phosphatase activity                                                            | F       | 3              | 5               | 5            | 60.0000         | 100.0000        | 5.3240  | 0.0030           |
| 44  | metalloendopeptidase inhibitor activity                                                | F       | 3              | 7               | 7            | 42.8571         | 100.0000        | 4.3170  | 0.0030           |
| 45  | nucleic acid binding                                                                   | F       | 182            | 2709            | 3327         | 6.7183          | 81.4247         | 2.9670  | 0.0030           |
| 46  | protein phosphatase type 2A activity                                                   | F       | 3              | 6               | 6            | 50.0000         | 100.0000        | 4.7610  | 0.0040           |
| 47  | enzyme binding                                                                         | F       | 19             | 179             | 198          | 10.6145         | 90.4040         | 2.9860  | 0.0040           |
| 48  | valine-tRNA ligase activity                                                            | F       | 2              | 2               | 2            | 100.0000        | 100.0000        | 5.8400  | 0.0050           |
| 49  | procollagen-lysine 5-dioxygenase activity                                              | F       | 2              | 3               | 3            | 66.6667         | 100.0000        | 4.6280  | 0.0050           |
| 50  | phosphatidylinositol-4\,5-bisphosphate 3-kinase activity                               | F       | 2              | 3               | 3            | 66.6667         | 100.0000        | 4.6280  | 0.0070           |
| 51  | copper\, zinc superoxide dismutase activity                                            | F       | 3              | 7               | 7            | 42.8571         | 100.0000        | 4.3170  | 0.0070           |
| 52  | acetyl-CoA C-acyltransferase activity                                                  | F       | 2              | 3               | 3            | 66.6667         | 100.0000        | 4.6280  | 0.0080           |
| 53  | 1-phosphatidylinositol-4-phosphate 5-kinase activity                                   | F       | 3              | 8               | 8            | 37.5000         | 100.0000        | 3.9520  | 0.0080           |
| 54  | casein kinase I activity                                                               | F       | 2              | 3               | 3            | 66.6667         | 100.0000        | 4.6280  | 0.0090           |
| 55  | intracellular                                                                          | C       | 492            | 6933            | 8118         | 7.0965          | 85.4028         | 7.7860  | 0.0000           |
| 56  | nucleosome                                                                             | C       | 14             | 56              | 115          | 25.0000         | 48.6957         | 6.3780  | 0.0000           |
| 57  | cytoplasm                                                                              | C       | 266            | 3484            | 3969         | 7.6349          | 87.7803         | 6.1860  | 0.0000           |
| 58  | protein complex                                                                        | C       | 150            | 1750            | 2202         | 8.5714          | 79.4732         | 5.9050  | 0.0000           |
| 59  | nucleus                                                                                | C       | 239            | 3274            | 3798         | 7.2999          | 86.2033         | 4.9910  | 0.0000           |
| 60  | mitochondrion                                                                          | C       | 65             | 730             | 822          | 8.9041          | 88.8078         | 4.0750  | 0.0000           |
| 61  | chromatin                                                                              | C       | 18             | 140             | 217          | 12.8571         | 64.5161         | 3.8030  | 0.0000           |
| 62  | nuclear lamina                                                                         | C       | 4              | 9               | 9            | 44.4444         | 100.0000        | 5.1030  | 0.0020           |
| 63  | dynactin complex                                                                       | C       | 3              | 6               | 7            | 50.0000         | 85.7143         | 4.7610  | 0.0020           |
| 64  | nuclear inner membrane                                                                 | C       | 4              | 11              | 13           | 36.3636         | 84.6154         | 4.4700  | 0.0020           |
| 65  | ribosome                                                                               | C       | 21             | 176             | 345          | 11.9318         | 51.0145         | 3.7290  | 0.0030           |
| 66  | chromosome                                                                             | C       | 27             | 279             | 364          | 9.6774          | 76.6484         | 3.0500  | 0.0030           |
| 67  | mitochondrial envelope                                                                 | C       | 27             | 280             | 329          | 9.6429          | 85.1064         | 3.0300  | 0.0040           |
| 68  | eukaryotic translation elongation factor 1 complex                                     | C       | 3              | 6               | 6            | 50.0000         | 100.0000        | 4.7610  | 0.0050           |
| 69  | ATP-binding cassette (ABC) transporter complex                                         | C       | 3              | 8               | 8            | 37.5000         | 100.0000        | 3.9520  | 0.0070           |
| 70  | nucleoplasm                                                                            | C       | 31             | 343             | 376          | 9.0379          | 91.2234         | 2.8650  | 0.0070           |
| 71  | endosome                                                                               | C       | 12             | 96              | 104          | 12.5000         | 92.3077         | 2.9910  | 0.0090           |
| 72  | ribonucleoprotein complex                                                              | C       | 32             | 355             | 550          | 9.0141          | 64.5455         | 2.8960  | 0.0090           |

## DOWN-REGULATED - GENMAPP

| No. | MAPP Name                               | Number Changed | Number Measured | Number on MAPP | Percent Changed | Percent Present | Z Score | Permuted P Value |
|-----|-----------------------------------------|----------------|-----------------|----------------|-----------------|-----------------|---------|------------------|
| 1   | Mm_Proteasome_Degradation               | 13             | 73              | 81             | 17.8082         | 90.1235         | 5.3850  | 0.0000           |
| 2   | Mm_Porphyrin_and_chlorophyll_metabolism | 5              | 15              | 58             | 33.3333         | 25.8621         | 5.2850  | 0.0000           |
| 3   | Mm_mRNA_processing_binding_Reactome     | 37             | 426             | 551            | 8.6854          | 77.3140         | 4.1660  | 0.0000           |



| 4                              | Mm_Pyrimidine_metabolism                                           |         | 7              | 51              | 87           | 13.7255         | 58.6207         | 3.0960  | 0.0080           |
|--------------------------------|--------------------------------------------------------------------|---------|----------------|-----------------|--------------|-----------------|-----------------|---------|------------------|
| DOWN-REGULATED - GENE ONTOLOGY |                                                                    |         |                |                 |              |                 |                 |         |                  |
| No.                            | GO Name                                                            | GO Type | Number Changed | Number Measured | Number in GO | Percent Changed | Percent Present | Z Score | Permuted P Value |
| 1                              | heme oxidation                                                     | P       | 2              | 2               | 2            | 100.0000        | 100.0000        | 7.7730  | 0.0000           |
| 2                              | metabolism                                                         | P       | 288            | 6706            | 7938         | 4.2947          | 84.4797         | 6.8700  | 0.0000           |
| 3                              | regulation of progression through cell cycle                       | P       | 34             | 375             | 410          | 9.0667          | 91.4634         | 6.5300  | 0.0000           |
| 4                              | mRNA metabolism                                                    | P       | 22             | 196             | 223          | 11.2245         | 87.8924         | 6.4180  | 0.0000           |
| 5                              | RNA processing                                                     | P       | 30             | 329             | 371          | 9.1185          | 88.6792         | 6.1610  | 0.0000           |
| 6                              | RNA splicing                                                       | P       | 17             | 144             | 167          | 11.8056         | 86.2276         | 5.8900  | 0.0000           |
| 7                              | mRNA processing                                                    | P       | 19             | 173             | 198          | 10.9827         | 87.3737         | 5.8440  | 0.0000           |
| 8                              | cell cycle                                                         | P       | 45             | 629             | 681          | 7.1542          | 92.3642         | 5.7490  | 0.0000           |
| 9                              | DNA replication                                                    | P       | 16             | 145             | 160          | 11.0345         | 90.6250         | 5.3800  | 0.0000           |
| 10                             | protein biosynthesis                                               | P       | 41             | 588             | 801          | 6.9728          | 73.4082         | 5.2960  | 0.0000           |
| 11                             | actin cytoskeleton organization and biogenesis                     | P       | 17             | 163             | 171          | 10.4295         | 95.3216         | 5.2670  | 0.0000           |
| 12                             | actin polymerization and/or depolymerization                       | P       | 8              | 52              | 54           | 15.3846         | 96.2963         | 4.9960  | 0.0000           |
| 13                             | protein polymerization                                             | P       | 7              | 43              | 50           | 16.2791         | 86.0000         | 4.8750  | 0.0000           |
| 14                             | DNA metabolism                                                     | P       | 37             | 544             | 682          | 6.8015          | 79.7654         | 4.8550  | 0.0000           |
| 15                             | nuclear mRNA splicing\, via spliceosome                            | P       | 13             | 118             | 135          | 11.0170         | 87.4074         | 4.8380  | 0.0000           |
| 16                             | nucleobase\, nucleoside\, nucleotide and nucleic acid metabolism   | P       | 128            | 2804            | 3355         | 4.5649          | 83.5768         | 4.5470  | 0.0000           |
| 17                             | ubiquitin-dependent protein catabolism                             | P       | 13             | 132             | 149          | 9.8485          | 88.5906         | 4.3540  | 0.0000           |
| 18                             | protein catabolism                                                 | P       | 16             | 190             | 215          | 8.4211          | 88.3721         | 4.1100  | 0.0000           |
| 19                             | protein modification                                               | P       | 73             | 1476            | 1665         | 4.9458          | 88.6487         | 4.0050  | 0.0000           |
| 20                             | cell death                                                         | P       | 35             | 603             | 650          | 5.8043          | 92.7692         | 3.7020  | 0.0000           |
| 21                             | response to biotic stimulus                                        | P       | 45             | 879             | 969          | 5.1195          | 90.7121         | 3.3250  | 0.0000           |
| 22                             | oligosaccharide catabolism                                         | P       | 2              | 2               | 2            | 100.0000        | 100.0000        | 7.7730  | 0.0010           |
| 23                             | pyridoxine biosynthesis                                            | P       | 2              | 2               | 2            | 100.0000        | 100.0000        | 7.7730  | 0.0010           |
| 24                             | cyclin catabolism                                                  | P       | 2              | 3               | 3            | 66.6667         | 100.0000        | 6.2420  | 0.0010           |
| 25                             | antigen processing\, exogenous antigen via MHC class II            | P       | 3              | 9               | 13           | 33.3333         | 69.2308         | 5.1340  | 0.0010           |
| 26                             | actin filament polymerization                                      | P       | 5              | 25              | 27           | 20.0000         | 92.5926         | 4.7720  | 0.0010           |
| 27                             | cytoskeleton organization and biogenesis                           | P       | 25             | 385             | 431          | 6.4935          | 89.3272         | 3.7140  | 0.0010           |
| 28                             | protein folding                                                    | P       | 15             | 200             | 227          | 7.5000          | 88.1057         | 3.4730  | 0.0010           |
| 29                             | positive regulation of T cell differentiation                      | P       | 4              | 17              | 17           | 23.5294         | 100.0000        | 4.7610  | 0.0020           |
| 30                             | chromosome segregation                                             | P       | 6              | 41              | 46           | 14.6342         | 89.1304         | 4.1610  | 0.0020           |
| 31                             | cell division                                                      | P       | 14             | 168             | 178          | 8.3333          | 94.3820         | 3.7970  | 0.0020           |
| 32                             | ubiquitin cycle                                                    | P       | 26             | 437             | 511          | 5.9497          | 85.5186         | 3.3080  | 0.0020           |
| 33                             | mRNA export from nucleus                                           | P       | 5              | 26              | 32           | 19.2308         | 81.2500         | 4.6440  | 0.0030           |
| 34                             | DNA-dependent DNA replication                                      | P       | 8              | 69              | 73           | 11.5942         | 94.5206         | 3.9670  | 0.0030           |
| 35                             | mitosis                                                            | P       | 12             | 136             | 146          | 8.8235          | 93.1507         | 3.7380  | 0.0030           |
| 36                             | apoptosis                                                          | P       | 32             | 572             | 617          | 5.5944          | 92.7066         | 3.3110  | 0.0030           |
| 37                             | purine base biosynthesis                                           | P       | 2              | 4               | 4            | 50.0000         | 100.0000        | 5.3150  | 0.0040           |
| 38                             | deoxyribonucleotide metabolism                                     | P       | 3              | 13              | 27           | 23.0769         | 48.1482         | 4.0700  | 0.0060           |
| 39                             | mitotic chromosome condensation                                    | P       | 3              | 14              | 16           | 21.4286         | 87.5000         | 3.8740  | 0.0060           |
| 40                             | antigen presentation                                               | P       | 6              | 52              | 63           | 11.5385         | 82.5397         | 3.4190  | 0.0060           |
| 41                             | defense response                                                   | P       | 40             | 828             | 915          | 4.8309          | 90.4918         | 2.7360  | 0.0060           |
| 42                             | ATP synthesis coupled proton transport                             | P       | 5              | 45              | 60           | 11.1111         | 75.0000         | 3.0160  | 0.0070           |
| 43                             | ribosome biogenesis                                                | P       | 7              | 79              | 84           | 8.8608          | 94.0476         | 2.8620  | 0.0070           |
| 44                             | response to stress                                                 | P       | 47             | 1014            | 1107         | 4.6351          | 91.5989         | 2.6810  | 0.0070           |
| 45                             | mitochondrial electron transport\, NADH to ubiquinone              | P       | 3              | 14              | 25           | 21.4286         | 56.0000         | 3.8740  | 0.0080           |
| 46                             | response to reactive oxygen species                                | P       | 3              | 16              | 16           | 18.7500         | 100.0000        | 3.5330  | 0.0080           |
| 47                             | actin filament organization                                        | P       | 5              | 45              | 47           | 11.1111         | 95.7447         | 3.0160  | 0.0080           |
| 48                             | antigen presentation\, exogenous peptide antigen                   | P       | 2              | 5               | 6            | 40.0000         | 83.3333         | 4.6730  | 0.0090           |
| 49                             | germ cell migration                                                | P       | 2              | 6               | 6            | 33.3333         | 100.0000        | 4.1910  | 0.0090           |
| 50                             | regulation of mitosis                                              | P       | 5              | 42              | 45           | 11.9048         | 93.3333         | 3.2060  | 0.0090           |
| 51                             | heme oxygenase (decyclizing) activity                              | F       | 2              | 2               | 2            | 100.0000        | 100.0000        | 7.7730  | 0.0000           |
| 52                             | RNA binding                                                        | F       | 40             | 466             | 548          | 8.5837          | 85.0365         | 6.7010  | 0.0000           |
| 53                             | ribonucleoside-diphosphate reductase activity                      | F       | 2              | 3               | 3            | 66.6667         | 100.0000        | 6.2420  | 0.0000           |
| 54                             | nucleotide binding                                                 | F       | 95             | 1750            | 1959         | 5.4286          | 89.3313         | 5.6290  | 0.0000           |
| 55                             | protein binding                                                    | F       | 207            | 4716            | 5185         | 4.3893          | 90.9547         | 5.6050  | 0.0000           |
| 56                             | structural constituent of ribosome                                 | F       | 18             | 183             | 354          | 9.8361          | 51.6949         | 5.1260  | 0.0000           |
| 57                             | unfolded protein binding                                           | F       | 15             | 146             | 159          | 10.2740         | 91.8239         | 4.8750  | 0.0000           |
| 58                             | antigen binding                                                    | F       | 6              | 34              | 63           | 17.6471         | 53.9683         | 4.7870  | 0.0000           |
| 59                             | ATP binding                                                        | F       | 59             | 1180            | 1331         | 5.0000          | 88.6551         | 3.6520  | 0.0000           |
| 60                             | binding                                                            | F       | 326            | 9103            | 10565        | 3.5812          | 86.1619         | 3.3050  | 0.0000           |
| 61                             | NADH dehydrogenase (ubiquinone) activity                           | F       | 5              | 27              | 39           | 18.5185         | 69.2308         | 4.5230  | 0.0010           |
| 62                             | NADH dehydrogenase activity                                        | F       | 5              | 31              | 43           | 16.1290         | 72.0930         | 4.0900  | 0.0020           |
| 63                             | 3 iron\, 4 sulfur cluster binding                                  | F       | 2              | 2               | 2            | 100.0000        | 100.0000        | 7.7730  | 0.0030           |
| 64                             | extracellular matrix constituent conferring elasticity             | F       | 2              | 4               | 4            | 50.0000         | 100.0000        | 5.3150  | 0.0030           |
| 65                             | threonine endopeptidase activity                                   | F       | 4              | 18              | 21           | 22.2222         | 85.7143         | 4.5840  | 0.0030           |
| 66                             | identical protein binding                                          | F       | 16             | 223             | 237          | 7.1749          | 94.0928         | 3.3930  | 0.0030           |
| 67                             | hydrogen-transporting ATP synthase activity\, rotational mechanism | F       | 5              | 43              | 56           | 11.6279         | 76.7857         | 3.1410  | 0.0050           |
| 68                             | hydrogen-transporting ATPase activity\, rotational mechanism       | F       | 5              | 45              | 58           | 11.1111         | 77.5862         | 3.0160  | 0.0050           |
| 69                             | structural molecule activity                                       | F       | 32             | 632             | 893          | 5.0633          | 70.7727         | 2.7130  | 0.0050           |
| 70                             | intracellular calcium activated chloride channel activity          | F       | 2              | 3               | 3            | 66.6667         | 100.0000        | 6.2420  | 0.0060           |
| 71                             | ligase activity                                                    | F       | 21             | 382             | 449          | 5.4974          | 85.0780         | 2.5790  | 0.0070           |
| 72                             | beta-N-acetylhexosaminidase activity                               | F       | 2              | 4               | 5            | 50.0000         | 80.0000         | 5.3150  | 0.0080           |
| 73                             | ATP-dependent helicase activity                                    | F       | 9              | 98              | 109          | 9.1837          | 89.9083         | 3.3720  | 0.0080           |
| 74                             | methionyl aminopeptidase activity                                  | F       | 2              | 5               | 5            | 40.0000         | 100.0000        | 4.6730  | 0.0090           |
| 75                             | pepsin A activity                                                  | F       | 2              | 7               | 9            | 28.5714         | 77.7778         | 3.8120  | 0.0090           |
| 76                             | ATPase activity                                                    | F       | 19             | 312             | 360          | 6.0897          | 86.6667         | 2.9250  | 0.0090           |
| 77                             | intracellular                                                      | C       | 325            | 6934            | 8118         | 4.6870          | 85.4151         | 9.6380  | 0.0000           |
| 78                             | cytoplasm                                                          | C       | 191            | 3484            | 3969         | 5.4822          | 87.7803         | 8.7380  | 0.0000           |
| 79                             | Arp2/3 protein complex                                             | C       | 4              | 8               | 8            | 50.0000         | 100.0000        | 7.5170  | 0.0000           |
| 80                             | protein complex                                                    | C       | 106            | 1751            | 2202         | 6.0537          | 79.5186         | 7.2130  | 0.0000           |
| 81                             | ribonucleoprotein complex                                          | C       | 33             | 355             | 550          | 9.2958          | 64.5455         | 6.5970  | 0.0000           |
| 82                             | proteasome complex (sensu Eukaryota)                               | C       | 8              | 37              | 42           | 21.6216         | 88.0952         | 6.3690  | 0.0000           |
| 83                             | mitochondrion                                                      | C       | 50             | 730             | 822          | 6.8493          | 88.8078         | 5.7360  | 0.0000           |
| 84                             | nucleus                                                            | C       | 149            | 3275            | 3798         | 4.5496          | 86.2296         | 4.9580  | 0.0000           |
| 85                             | spliceosome complex                                                | C       | 9              | 71              | 78           | 12.6761         | 91.0256         | 4.5430  | 0.0000           |
| 86                             | ribosome                                                           | C       | 16             | 176             | 345          | 9.0909          | 51.0145         | 4.4610  | 0.0000           |

|    |                                                    |   |    |     |     |         |          |        |        |
|----|----------------------------------------------------|---|----|-----|-----|---------|----------|--------|--------|
| 87 | mitochondrial inner membrane                       | C | 19 | 232 | 275 | 8.1897  | 84.3636  | 4.3460 | 0.0000 |
| 88 | cytosol                                            | C | 23 | 344 | 383 | 6.6860  | 89.8172  | 3.7100 | 0.0000 |
| 89 | cyclin-dependent protein kinase holoenzyme complex | C | 3  | 7   | 7   | 42.8571 | 100.0000 | 5.9580 | 0.0020 |
| 90 | proteasome core complex (sensu Eukaryota)          | C | 4  | 18  | 21  | 22.2222 | 85.7143  | 4.5840 | 0.0020 |
| 91 | actin cytoskeleton                                 | C | 16 | 206 | 229 | 7.7670  | 89.9563  | 3.7450 | 0.0020 |
| 92 | MHC class I protein complex                        | C | 4  | 25  | 32  | 16.0000 | 78.1250  | 3.6360 | 0.0080 |
| 93 | proton-transporting two-sector ATPase complex      | C | 5  | 47  | 61  | 10.6383 | 77.0492  | 2.8990 | 0.0080 |
| 94 | nucleolus                                          | C | 10 | 133 | 147 | 7.5188  | 90.4762  | 2.8380 | 0.0090 |

TABLE A5

| GENES UP-REGULATED BY THE ATHEROGENIC DIET IN HEARTS |            |             |               |             |                                                                                                                                 |
|------------------------------------------------------|------------|-------------|---------------|-------------|---------------------------------------------------------------------------------------------------------------------------------|
| TargetID                                             | Diff_Score | Fold_Change | Symbol        | Accession   | Definition                                                                                                                      |
| scl013728.1_329-S                                    | 225.3751   | 2.31        | Mark2         | NM_007928.1 | Mus musculus MAP/microtubule affinity-regulating kinase 2 (Mark2), mRNA.                                                        |
| scl00227682.2_166-S                                  | 206.0585   | 2.24        | G430055L02Rik | NM_145520.2 |                                                                                                                                 |
| scl19105.6_353-S                                     | 203.7144   | 2.1         | Ttn           | XM_130312.3 | Mus musculus titin (Ttn), mRNA.                                                                                                 |
| scl23219.3_221-S                                     | 195.1325   | 2.3         | Rab33b        | NM_016858.1 | Mus musculus RAB33B, member of RAS oncogene family (Rab33b), mRNA.                                                              |
| scl020320.8_193-S                                    | 180.409    | 2.11        | Sdfr1         | NM_009145.1 | Mus musculus stromal cell derived factor receptor 1 (Sdfr1), mRNA.                                                              |
| scl000674.1_0-S                                      | 167.4774   | 3.47        | Ilgb1         | NM_010578.1 | Mus musculus integrin beta 1 (fibronectin receptor beta) (Ilgb1), mRNA.                                                         |
| scl35003.22_120-S                                    | 166.5555   | 2.11        | Adam9         | NM_007404.1 | Mus musculus a disintegrin and metalloproteinase domain 9 (meltrin gamma) (Adam9), mRNA.                                        |
| scl0066885.2_329-S                                   | 158.1225   | 1.78        | Acad5b        | NM_025826.1 | Mus musculus acyl-Coenzyme A dehydrogenase, short/branched chain (Acad5b), mRNA.                                                |
| scl0326622.12_322-S                                  | 150.4993   | 1.92        | Upf2          | XM_140801.3 | Mus musculus UPF2 regulator of nonsense transcripts homolog (yeast) (Upf2), mRNA.                                               |
| scl38952.4.1_0-S                                     | 149.1629   | 2.2         | Popdc3        | NM_024286.1 | Mus musculus popeye domain containing 3 (Popdc3), mRNA.                                                                         |
| scl0019246.2_230-S                                   | 148.3342   | 2.4         | Ptpn1         | NM_011201.1 | Mus musculus protein tyrosine phosphatase, non-receptor type 1 (Ptpn1), mRNA.                                                   |
| scl071955.1_257-S                                    | 145.442    | 2.11        | 2400003C14Rik | NM_028018.1 | Mus musculus RIKEN cDNA 2400003C14 gene (2400003C14Rik), mRNA.                                                                  |
| scl0002448.1_81-S                                    | 143.3259   | 1.77        | Cpt1b         | NM_009948.1 | Mus musculus carnitine palmitoyltransferase 1b, muscle (Cpt1b), mRNA.                                                           |
| scl28579.2_420-S                                     | 142.4768   | 2.08        | Fin14         |             | Mus musculus fibroblast growth factor inducible 14 (Fin14), mRNA.                                                               |
| scl023849.4_8-S                                      | 141.4361   | 1.78        | Copeb         | NM_011803.1 | Mus musculus core promoter element binding protein (Copeb), mRNA.                                                               |
| scl19523.39_64-S                                     | 141.3836   | 2.2         | Notch1        | NM_008714.2 | Mus musculus Notch gene homolog 1 (Drosophila) (Notch1), mRNA.                                                                  |
| scl37402.3_73-S                                      | 140.2336   | 1.75        | Sas           | NM_025982   | Mus musculus sarcoma amplified sequence (Sas), mRNA.                                                                            |
| scl21429.6_290-S                                     | 138.9363   | 1.76        | Lmo4          | NM_010723.2 | Mus musculus LIM domain only 4 (Lmo4), mRNA.                                                                                    |
| scl067248.2_33-S                                     | 136.3396   | 1.67        | Rpl39         | NM_026055.1 | Mus musculus ribosomal protein L39 (Rpl39), mRNA.                                                                               |
| scl40333.9_365-S                                     | 132.7923   | 4.67        | Mat2b         | NM_134017.1 | Mus musculus methionine adenosyltransferase II, beta (Mat2b), mRNA.                                                             |
| scl00320487.1_23-S                                   | 132.4043   | 2.59        | D930036F22Rik | NM_177171.3 | Mus musculus RIKEN cDNA D930036F22 gene (D930036F22Rik), mRNA.                                                                  |
| scl0012848.2_316-S                                   | 132.2569   | 1.8         | Cops2         | NM_009939.1 | Mus musculus COP9 (constitutive photomorphogenic) homolog, subunit 2 (Arabidopsis thaliana) (Cops2), mRNA.                      |
| scl0075613.2_301-S                                   | 126.1417   | 1.78        | 2610034E13Rik | NM_029365.1 | Mus musculus RIKEN cDNA 2610034E13 gene (2610034E13Rik), mRNA.                                                                  |
| scl52911.9_189-S                                     | 125.2484   | 1.79        | Esrra         | NM_007953.1 | Mus musculus estrogen related receptor, alpha (Esrra), mRNA.                                                                    |
| scl38222.21_67-S                                     | 122.9735   | 2.17        | Sash1         | NM_175155.3 |                                                                                                                                 |
| scl0026442.1_315-S                                   | 119.57     | 3.08        | Psm5          | NM_011967.1 | Mus musculus proteasome (prosome, macropain) subunit, alpha type 5 (Psm5), mRNA.                                                |
| scl39226.2_178_25-S                                  | 118.4697   | 1.72        | 1110012N22Rik | XM_126634.3 | Mus musculus RIKEN cDNA 1110012N22 gene (1110012N22Rik), mRNA.                                                                  |
| scl29852.1_47-S                                      | 116.9425   | 1.63        | Mrp153        | NM_026744.1 | Mus musculus mitochondrial ribosomal protein L53 (Mrp153), mRNA.                                                                |
| scl45459.17_81-S                                     | 116.6657   | 1.67        | Kpna3         | NM_008466.2 | Mus musculus karyopherin (importin) alpha 3 (Kpna3), mRNA.                                                                      |
| scl25574.8.1_15-S                                    | 116.1775   | 2.37        | Ube2j1        | NM_019586.2 | Mus musculus ubiquitin-conjugating enzyme E2, J1 (Ube2j1), mRNA.                                                                |
| scl0070231.1_327-S                                   | 115.9849   | 1.78        | Gorasp2       | NM_027352.2 | Mus musculus golgi reassembly stacking protein 2 (Gorasp2), mRNA.                                                               |
| scl26735.47.1_66-S                                   | 112.1964   | 1.81        | Ift172        | NM_026298.4 | Mus musculus intraflagellar transport 172 (Ift172), mRNA.                                                                       |
| scl45408.20.1_29-S                                   | 112.1871   | 1.81        | Ephx2         | NM_007940.2 | Mus musculus epoxide hydrolase 2, cytoplasmic (Ephx2), mRNA.                                                                    |
| scl28480.7_231-S                                     | 111.8619   | 1.74        | Adipor2       | NM_197985.2 |                                                                                                                                 |
| scl0003758.1_1237-S                                  | 110.8698   | 1.61        | Ubqln1        | NM_026842.3 | Mus musculus ubiquitin 1 (Ubqln1), transcript variant 1, mRNA.                                                                  |
| scl24770.15_172-S                                    | 110.3379   | 1.76        | Aldh4a1       | NM_175438   | Mus musculus aldehyde dehydrogenase 4 family, member A1 (Aldh4a1), mRNA.                                                        |
| scl27267.9.1_12-S                                    | 110.0567   | 2.3         | Myl2          | NM_010861   | Mus musculus myosin, light polypeptide 2, regulatory, cardiac, slow (Myl2), mRNA.                                               |
| scl0015530.1_184-S                                   | 108.2422   | 1.67        | Hspg2         | NM_008305.2 | Mus musculus perlecan (heparan sulfate proteoglycan 2) (Hspg2), mRNA.                                                           |
| scl015204.23_217-S                                   | 107.9656   | 1.8         | Herc2         | NM_010418.1 | Mus musculus hect (homologous to the E6-AP (UBE3A) carboxyl terminus) domain and RCC1 (CHC1)-like domain (RLD) 2 (Herc2), mRNA. |
| scl17431.17.1_113-S                                  | 107.3953   | 2.74        | Tnnt2         | NM_011619.1 | Mus musculus troponin T2, cardiac (Tnnt2), mRNA.                                                                                |
| scl42463.7.1_1-S                                     | 107.0418   | 2.51        | 1810011O16Rik | NM_025456.2 | Mus musculus RIKEN cDNA 1810011O16 gene (1810011O16Rik), mRNA.                                                                  |
| scl0069386.2_29-S                                    | 106.7067   | 1.8         | Hist1h4h      | NM_153173.1 | Mus musculus histone 1, H4h (Hist1h4h), mRNA.                                                                                   |
| scl53453.19_390-S                                    | 106.5871   | 2.2         | Adrbk1        | NM_130863   | Mus musculus adrenergic receptor kinase, beta 1 (Adrbk1), mRNA.                                                                 |
| scl022190.1_154-S                                    | 105.8834   | 2.08        | Ubc           | XM_147315.1 | Mus musculus ubiquitin C (Ubc), mRNA.                                                                                           |
| scl020818.1_29-S                                     | 103.5134   | 3.04        | Srpb          | NM_009275.2 | Mus musculus signal recognition particle receptor, B subunit (Srpb), mRNA.                                                      |
| scl30402.11.1_13-S                                   | 102.3947   | 2.01        | BC020002      | NM_145374.1 | Mus musculus cDNA sequence BC020002 (BC020002), mRNA.                                                                           |
| scl40890.2_6-S                                       | 102.1184   | 1.56        | Ramp2         | NM_019444.1 | Mus musculus receptor (calcitonin) activity modifying protein 2 (Ramp2), mRNA.                                                  |
| scl018132.31_78-S                                    | 101.1458   | 1.8         | Notch4        | NM_010929   | Mus musculus Notch gene homolog 4 (Drosophila) (Notch4), mRNA.                                                                  |
| scl24427.29_125-S                                    | 101.059    | 1.61        | Ubp2          | NM_026872.1 | Mus musculus ubiquitin-associated protein 2 (Ubp2), mRNA.                                                                       |
| scl0017859.1_306-S                                   | 100.7395   | 1.8         | Mxi1          | NM_010847.1 | Mus musculus Max interacting protein 1 (Mxi1), mRNA.                                                                            |
| scl17336.3.1_84-S                                    | 100.7229   | 1.61        | 2810025M15Rik | NM_027274.2 | Mus musculus RIKEN cDNA 2810025M15 gene (2810025M15Rik), mRNA.                                                                  |
| scl52119.18_599-S                                    | 100.0919   | 3.25        | Jmjd1b        | NM_029518.1 | Mus musculus jumonji domain containing 1B (Jmjd1b), mRNA.                                                                       |
| scl084652.1_47-S                                     | 98.7797    | 1.78        | Dctnnb1a      | NM_053090   | Mus musculus down-regulated by Ctnnb1, a (Dctnnb1a), mRNA.                                                                      |

|               |        |         |      |               |             |                                                                                                          |
|---------------|--------|---------|------|---------------|-------------|----------------------------------------------------------------------------------------------------------|
| scl0076890.1  | 96-S   | 98.3278 | 2.06 | 0610016J10Rik | NM_133771.1 | Mus musculus RIKEN cDNA 0610016J10 gene (0610016J10Rik), mRNA.                                           |
| scl54140.7.1  | 25-S   | 97.5282 | 1.71 | Dnase111      | NM_027109.1 |                                                                                                          |
| scl27703.26   | 20-S   | 97.2142 | 1.67 | Pdgfra        | NM_011058.1 | Mus musculus platelet derived growth factor receptor, alpha polypeptide (Pdgfra), mRNA.                  |
| scl019244.5   | 2-S    | 97.1468 | 1.52 | Ptp4a2        | NM_008974.2 | Mus musculus protein tyrosine phosphatase 4a2 (Ptp4a2), mRNA.                                            |
| scl0067949.2  | 13-S   | 96.6472 | 2.08 | Mki67ip       | NM_026472.2 | Mus musculus Mki67 (FHA domain) interacting nucleolar phosphoprotein (Mki67ip), mRNA.                    |
| scl39478.12   | 629-S  | 96.4748 | 1.72 | Plekhh1       | NM_183034.1 | Mus musculus pleckstrin homology domain containing, family M (with RUN domain) member 1 (Plekhh1), mRNA. |
| scl0022070.1  | 31-S   | 95.528  | 2.02 | Tpt1          | NM_009429   | Mus musculus tumor protein, translationally-controlled 1 (Tpt1), mRNA.                                   |
| scl069257.1   | 70-S   | 95.0704 | 1.88 | Eif2          | NM_023502.1 | Mus musculus E74-like factor 2 (Eif2), mRNA.                                                             |
| scl46010.5    | 526-S  | 94.9227 | 1.6  | Cln5          | XM_127882.3 | Mus musculus ceroid-lipofuscinosis, neuronal 5 (Cln5), mRNA.                                             |
| scl00101476.1 | 284-S  | 94.8918 | 1.57 | AA960558      | NM_133942.1 | Mus musculus expressed sequence AA960558 (AA960558), mRNA.                                               |
| scl014897.1   | 29-S   | 94.3564 | 1.58 | Trip12        | NM_133975.2 |                                                                                                          |
| scl066576.4   | 1-S    | 94.0626 | 1.53 | Uqcrh         | NM_025641.2 |                                                                                                          |
| scl49765.36   | 30-S   | 93.8535 | 1.7  | Ptprs         | NM_011218.1 | Mus musculus protein tyrosine phosphatase, receptor type, S (Ptprs), mRNA.                               |
| scl056433.4   | 275-S  | 93.2447 | 1.56 | Vps29         | NM_019780.1 | Mus musculus vacuolar protein sorting 29 (S. pombe) (Vps29), mRNA.                                       |
| scl40141.3    | 333-S  | 92.8065 | 1.57 | 5730466P16Rik | NM_173453.1 | Mus musculus RIKEN cDNA 5730466P16 gene (5730466P16Rik), mRNA.                                           |
| scl31534.6.1  | 6-S    | 92.0252 | 1.75 | Ckap1         | NM_025548.1 | Mus musculus cytoskeleton-associated protein 1 (Ckap1), mRNA.                                            |
| scl42444.40   | 226-S  | 91.3322 | 2.03 | Garnl1        | NM_019994.3 | Mus musculus GTPase activating RANGAP domain-like 1 (Garnl1), mRNA.                                      |
| scl21235.24   | 380-S  | 91.2097 | 1.58 | BC026657      | NM_029895.3 |                                                                                                          |
| scl24919.4.1  | 260-S  | 90.5221 | 2.06 | Sync          | NM_023485.2 | Mus musculus syncollin (Sync), mRNA.                                                                     |
| scl20180.20   | 84-S   | 90.2175 | 1.73 | Rin2          | NM_028724.2 | Mus musculus Ras and Rab interactor 2 (Rin2), mRNA.                                                      |
| scl17047.9.4  | 6-S    | 90.1592 | 1.72 | BC013667      | NM_172266.1 | Mus musculus cDNA sequence BC013667 (BC013667), mRNA.                                                    |
| scl073122.1   | 292-S  | 90.1279 | 1.66 | 3110018K12Rik | XM_129857.4 | Mus musculus RIKEN cDNA 3110018K12 gene (3110018K12Rik), mRNA.                                           |
| scl18838.17   | 213-S  | 89.9051 | 1.78 | Mrg1          | NM_010825   | Mus musculus myeloid ecotropic viral integration site-related gene 1 (Mrg1), mRNA.                       |
| scl018412.1   | 16-S   | 89.8835 | 1.61 | Sqstm1        | NM_011018.1 | Mus musculus sequestosome 1 (Sqstm1), mRNA.                                                              |
| scl0072333.1  | 312-S  | 89.1298 | 1.55 | 2410003B16Rik | XM_204283.3 | Mus musculus RIKEN cDNA 2410003B16 gene (2410003B16Rik), mRNA.                                           |
| scl49695.8    | 112-S  | 88.1561 | 1.55 | Vapa          | NM_013933.2 | Mus musculus vesicle-associated membrane protein, associated protein A (Vapa), mRNA.                     |
| scl42239.4    | 289-S  | 87.6963 | 1.59 | Npc2          | NM_023409.3 | Mus musculus Niemann Pick type C2 (Npc2), mRNA.                                                          |
| scl022218.1   | 29-S   | 87.6662 | 1.49 | Sumo1         | NM_009460.1 |                                                                                                          |
| scl0020019.1  | 252-S  | 87.5783 | 1.89 | Rpo1-4        | NM_009088.2 | Mus musculus RNA polymerase 1-4 (Rpo1-4), mRNA.                                                          |
| scl013424.9   | 0-S    | 87.1194 | 1.91 | Dnchc1        | NM_030238.1 | Mus musculus dynein, cytoplasmic, heavy chain 1 (Dnchc1), mRNA.                                          |
| scl16460.33   | 2-S    | 87.1561 | 3.54 | Hdlbp         | NM_133808.2 | Mus musculus high density lipoprotein (HDL) binding protein (Hdlbp), mRNA.                               |
| scl16146.28   | 80-S   | 86.6554 | 1.74 | Lamc1         | NM_010683   | Mus musculus laminin, gamma 1 (Lamc1), mRNA.                                                             |
| scl32857.8.1  | 60-S   | 85.6905 | 1.96 | Lgals4        | NM_010706.1 | Mus musculus lectin, galactose binding, soluble 4 (Lgals4), mRNA.                                        |
| scl20687.14.1 | 105-S  | 85.3676 | 2.65 | Slc43a3       | NM_021398.1 | Mus musculus solute carrier family 43, member 3 (Slc43a3), mRNA.                                         |
| scl0232087.1  | 5-S    | 84.6148 | 1.99 | Mat2a         | NM_145569   | Mus musculus methionine adenosyltransferase II, alpha (Mat2a), mRNA.                                     |
| scl0017765.2  | 254-S  | 84.4411 | 2.15 | Mtf2          | NM_013827.1 | Mus musculus metal response element binding transcription factor 2 (Mtf2), mRNA.                         |
| scl19394.13   | 183-S  | 84.2157 | 1.73 | Ggta1         | NM_010283.1 | Mus musculus glycoprotein galactosyltransferase alpha 1,3 (Ggta1), mRNA.                                 |
| scl24880.7    | 98-S   | 84.1182 | 1.52 | Sfrs4         | NM_020587.1 | Mus musculus splicing factor, arginine/serine-rich 4 (SFRp75) (Sfrs4), mRNA.                             |
| scl21980.4.1  | 109-S  | 83.9432 | 1.75 | 1700021C14Rik | XM_355444.1 | Mus musculus RIKEN cDNA 1700021C14 gene (1700021C14Rik), mRNA.                                           |
| scl0003002.1  | 1949-S | 83.687  | 3.1  | Zfp106        | NM_011743.1 | Mus musculus zinc finger protein 106 (Zfp106), mRNA.                                                     |
| scl0012846.1  | 253-S  | 83.658  | 1.82 | Comt          | XM_147265.1 | Mus musculus catechol-O-methyltransferase (Comt), mRNA.                                                  |
| scl069920.4   | 5-S    | 83.165  | 1.67 | Polr2i        | XM_133304.4 | Mus musculus polymerase (RNA) II (DNA directed) polypeptide I (Polr2i), mRNA.                            |
| scl00224938.2 | 37-S   | 83.014  | 1.56 | Pja2          | NM_144859.1 | Mus musculus praja 2, RING-H2 motif containing (Pja2), mRNA.                                             |
| scl069178.1   | 5-S    | 82.6794 | 2.02 | Snx5          | NM_024225.2 | Mus musculus sorting nexin 5 (Snx5), mRNA.                                                               |
| scl37112.9    | 269-S  | 82.6682 | 1.49 | Esam1         | NM_027102.1 | Mus musculus endothelial cell-specific adhesion molecule (Esam1), mRNA.                                  |
| scl074150.16  | 288-S  | 82.5657 | 1.82 | Slc35f5       | NM_028787.2 | Mus musculus solute carrier family 35, member F5 (Slc35f5), mRNA.                                        |
| scl067440.9   | 18-S   | 82.2604 | 2.29 | Papd1         | NM_026157.1 | Mus musculus PAP associated domain containing 1 (Papd1), mRNA.                                           |
| scl0072046.1  | 240-S  | 81.9215 | 2.98 | 2010005J08Rik | NM_178623.2 | Mus musculus RIKEN cDNA 2010005J08 gene (2010005J08Rik), mRNA.                                           |
| scl31626.10.1 | 112-S  | 81.6969 | 1.5  | Bckdha        | NM_007533.2 | Mus musculus branched chain ketoacid dehydrogenase E1, alpha polypeptide (Bckdha), mRNA.                 |
| scl06958.2    | 91-S   | 81.1071 | 1.74 | 2310042M24Rik | NM_025868.1 | Mus musculus RIKEN cDNA 2310042M24 gene (2310042M24Rik), mRNA.                                           |
| scl29537.12   | 355-S  | 81.0835 | 1.76 | Foxj2         | NM_021899.2 | Mus musculus forkhead box J2 (Foxj2), mRNA.                                                              |
| scl0076055.1  | 48-S   | 80.9698 | 4.59 | Mgea5         | NM_023799.2 | Mus musculus meningioma expressed antigen 5 (hyaluronidase) (Mgea5), mRNA.                               |
| scl067414.12  | 0-S    | 80.4662 | 1.49 | Mfn1          | NM_024200.2 | Mus musculus mitofusin 1 (Mfn1), mRNA.                                                                   |
| scl00170791.1 | 106-S  | 79.6319 | 1.56 | Rnpc2         | NM_133242.1 | Mus musculus RNA-binding region (RNP1, RRM) containing 2 (Rnpc2), mRNA.                                  |
| scl30059.16.1 | 6-S    | 79.1378 | 1.98 | Mpp6          | NM_019939.1 | Mus musculus membrane protein, palmitoylated 6 (MAGUK p55 subfamily member 6) (Mpp6), mRNA.              |
| scl17443.8    | 550-S  | 79.0117 | 1.49 | Arl10b        | NM_026823.1 |                                                                                                          |

|                       |         |      |               |             |                                                                                                           |
|-----------------------|---------|------|---------------|-------------|-----------------------------------------------------------------------------------------------------------|
| scI068337.8 322-S     | 78.7831 | 1.53 | Crip2         | NM_024223.1 | Mus musculus cysteine rich protein 2 (Crip2), mRNA.                                                       |
| scI54521.7.509 3-S    | 78.6403 | 2.1  | Smpx          | NM_025357.1 | Mus musculus small muscle protein, X-linked (Smpx), mRNA.                                                 |
| scI0065111.1 63-S     | 78.5063 | 1.64 | Dap3          | NM_022994.2 | Mus musculus death associated protein 3 (Dap3), mRNA.                                                     |
| scI013480.1 38-S      | 78.3417 | 3.25 | Dpm1          | NM_010072.2 | Mus musculus dolichol-phosphate (beta-D) mannosyltransferase 1 (Dpm1), mRNA.                              |
| scI020826.1 68-S      | 77.7439 | 2.48 | Ssfa1         | XM_196564.2 | Mus musculus sperm specific antigen 1 (Ssfa1), mRNA.                                                      |
| scI0020928.2 272-S    | 77.3593 | 1.55 | Abcc9         | NM_011511.1 | Mus musculus ATP-binding cassette, sub-family C (CFTR/MRP), member 9 (Abcc9), transcript variant 1, mRNA. |
| scI17939.35.1 294-S   | 76.7563 | 1.64 | Aox1          | NM_009676.1 | Mus musculus aldehyde oxidase 1 (Aox1), mRNA.                                                             |
| scI0073197.1 297-S    | 76.0097 | 1.58 | D19Erd703e    | NM_029456.1 |                                                                                                           |
| scI22246.19.1 4-S     | 75.8665 | 1.85 | Mccc1         | NM_023644.2 | Mus musculus methylcrotonoyl-Coenzyme A carboxylase 1 (alpha) (Mccc1), mRNA.                              |
| scI24819.10.1 28-S    | 75.5987 | 1.58 | Tcea3         | NM_011542   | Mus musculus transcription elongation factor A (SII), 3 (Tcea3), mRNA.                                    |
| scI35194.5 5-S        | 75.3312 | 1.56 | Hig1          | NM_019814.2 | Mus musculus hypoxia induced gene 1 (Hig1), mRNA.                                                         |
| scI000011.1 73-S      | 74.6768 | 1.49 | Strn3         | NM_052973   | Mus musculus striatin, calmodulin binding protein 3 (Strn3), mRNA.                                        |
| scI23946.8.1 41-S     | 74.6415 | 1.44 | Urod          | NM_009478.1 | Mus musculus uroporphyrinogen decarboxylase (Urod), mRNA.                                                 |
| scI0072278.1 319-S    | 74.1941 | 2.07 | D9Erd392e     | NM_028181.1 |                                                                                                           |
| scI39652.23.1463 24-S | 73.732  | 1.52 | Kpnb1         | NM_008379.2 | Mus musculus karyopherin (importin) beta 1 (Kpnb1), mRNA.                                                 |
| scI51536.11 7-S       | 73.7081 | 1.75 | Etf1          | NM_144866.2 | Mus musculus eukaryotic translation termination factor 1 (Etf1), mRNA.                                    |
| scI0021761.2 320-S    | 73.5191 | 2.57 | Morf411       | NM_024431   | Mus musculus mortality factor 4 like 1 (Morf411), mRNA.                                                   |
| scI019166.8 87-S      | 73.4733 | 1.66 | Psm2          | NM_008944.1 | Mus musculus proteasome (prosome, macropain) subunit, alpha type 2 (Psm2), mRNA.                          |
| scI011958.2 29-S      | 73.1739 | 2.16 | Atp5k         | NM_007507   | Mus musculus ATP synthase, H+ transporting, mitochondrial F1F0 complex, subunit e (Atp5k), mRNA.          |
| scI54871.18 531-S     | 73.0805 | 1.86 | Mtmr1         | NM_016985.1 | Mus musculus myotubularin related protein 1 (Mtmr1), mRNA.                                                |
| scI54450.17.1 6-S     | 73.0591 | 1.66 | DXImx40e      | NM_138603.2 | Mus musculus DNA segment, Chr X, Immunex 40, expressed (DXImx40e), mRNA.                                  |
| scI22658.17.1 65-S    | 72.8446 | 6.12 | Sec24d        | NM_027135.2 | Mus musculus SEC24 related gene family, member D (S. cerevisiae) (Sec24d), mRNA.                          |
| scI27109.17.1 35-S    | 72.728  | 1.76 | Plod3         | NM_011962.2 | Mus musculus procollagen-lysine, 2-oxoglutarate 5-dioxygenase 3 (Plod3), mRNA.                            |
| scI067374.11 26-S     | 72.5981 | 1.49 | Jam2          | NM_023844.2 | Mus musculus junction adhesion molecule 2 (Jam2), mRNA.                                                   |
| scI35560.5 28-S       | 72.3851 | 1.59 | Cox7a2        | NM_009945.2 | Mus musculus cytochrome c oxidase, subunit VIIa 2 (Cox7a2), mRNA.                                         |
| scI42464.2 123-S      | 72.2149 | 1.46 | 1110002B05Rik | NM_134054.1 | Mus musculus RIKEN cDNA 1110002B05 gene (1110002B05Rik), mRNA.                                            |
| scI25450.6 639-S      | 71.7949 | 1.72 | 5730528L13Rik | NM_028137.1 | Mus musculus RIKEN cDNA 5730528L13 gene (5730528L13Rik), mRNA.                                            |
| scI0064934.1 269-S    | 71.6239 | 2.55 | Pes1          | NM_022889.2 | Mus musculus pescadillo homolog 1, containing BRCT domain (zebrafish) (Pes1), mRNA.                       |
| scI25834.12 533-S     | 71.6202 | 1.64 | Snx8          | NM_127277.1 | Mus musculus sorting nexin 8 (Snx8), mRNA.                                                                |
| scI0012651.2 322-S    | 71.5604 | 1.55 | Chkb          | NM_007692.3 | Mus musculus choline kinase beta (Chkb), mRNA.                                                            |
| scI30665.8.1 14-S     | 71.489  | 2.76 | 1110032O16Rik | XM_133813.4 | Mus musculus RIKEN cDNA 1110032O16 gene (1110032O16Rik), mRNA.                                            |
| scI0017977.2 208-S    | 71.1215 | 2.02 | Ncoa1         | NM_010881.1 | Mus musculus nuclear receptor coactivator 1 (Ncoa1), mRNA.                                                |
| scI0027407.2 308-S    | 70.9962 | 1.47 | Abcf2         | NM_013853.1 | Mus musculus ATP-binding cassette, sub-family F (GCN20), member 2 (Abcf2), mRNA.                          |
| scI00230249.2 159-S   | 70.986  | 1.43 | A1314180      | NM_172381.2 | Mus musculus expressed sequence A1314180 (A1314180), mRNA.                                                |
| scI53474.8.1 75-S     | 70.8739 | 1.52 | Ccs           | NM_016892.2 | Mus musculus copper chaperone for superoxide dismutase (Ccs), mRNA.                                       |
| scI0027223.1 124-S    | 70.7521 | 1.69 | Trp53bp1      | NM_013735.2 | Mus musculus transformation related protein 53 binding protein 1 (Trp53bp1), mRNA.                        |
| scI098193.14 109-S    | 70.69   | 1.9  | Wdr42a        | NM_153555.1 |                                                                                                           |
| scI027883.1 63-S      | 70.3744 | 1.72 | D16H22S680E   | XM_147173.1 | Mus musculus DNA segment, Chr 16, human D22S680E, expressed (D16H22S680E), mRNA.                          |
| scI0110829.10 232-S   | 70.2414 | 2.52 | Lims1         | NM_026148.1 | Mus musculus LIM and senescent cell antigen-like domains 1 (Lims1), mRNA.                                 |
| scI018786.2 1-S       | 70.1267 | 1.44 | Plaa          | NM_172695.1 | Mus musculus phospholipase A2, activating protein (Plaa), mRNA.                                           |
| scI24399.13 176-S     | 70.1045 | 1.8  | Gba2          | NM_172692.1 | Mus musculus glucosidase beta 2 (Gba2), mRNA.                                                             |
| scI32537.2.2118 88-S  | 69.7762 | 2.02 | Rgma          | NM_177740.2 | Mus musculus RGM domain family, member A (Rgma), mRNA.                                                    |
| scI41579.7 169-S      | 69.6541 | 1.6  | Ppp2ca        | NM_019411.2 | Mus musculus protein phosphatase 2a, catalytic subunit, alpha isoform (Ppp2ca), mRNA.                     |
| scI00229211.2 16-S    | 69.4127 | 2.27 | Acad9         | NM_172678.2 | Mus musculus acyl-Coenzyme A dehydrogenase family, member 9 (Acad9), mRNA.                                |
| scI39445.1.46 133-S   | 69.4031 | 1.69 | Tex2          | XM_203370.3 | Mus musculus testis expressed gene 2 (Tex2), mRNA.                                                        |
| scI000086.1 135-S     | 69.3765 | 1.53 | AA959742      | NM_133807.1 | Mus musculus expressed sequence AA959742 (AA959742), mRNA.                                                |
| scI0268470.1 0-S      | 69.3266 | 1.71 | D11Moh35      | NM_172300   | Mus musculus DNA segment, Chr 11, KL Mohik 35 (D11Moh35), mRNA.                                           |
| scI0241431.7 330-S    | 69.3112 | 5.75 | Cmya3         | XM_141283.2 |                                                                                                           |
| scI014897.1 33-S      | 69.1069 | 1.57 | Trip12        | NM_133975.2 |                                                                                                           |
| GI_21070949-S         | 68.4962 | 1.91 | Ubc           | NM_019639.2 | Mus musculus ubiquitin C (Ubc), mRNA.                                                                     |
| scI068051.5 64-S      | 68.3951 | 1.54 | Nutf2         | NM_026532.2 | Mus musculus nuclear transport factor 2 (Nutf2), mRNA.                                                    |
| scI24787.5 386-S      | 68.0804 | 1.51 | 0610009K11Rik | NM_026689.3 | Mus musculus RIKEN cDNA 0610009K11 gene (0610009K11Rik), mRNA.                                            |
| scI020170.2 257-S     | 67.804  | 1.91 | Hps6          | NM_176785.1 | Mus musculus Hermansky-Pudlak syndrome 6 (Hps6), mRNA.                                                    |
| scI22078.18 184-S     | 67.7254 | 2.5  | Kpna4         | NM_008467.2 | Mus musculus karyopherin (importin) alpha 4 (Kpna4), mRNA.                                                |
| scI50763.13.1 199-S   | 67.7102 | 1.44 | Flot1         | NM_008027.1 | Mus musculus flotillin 1 (Flot1), mRNA.                                                                   |
| scI00218442.1 227-S   | 67.7027 | 2.45 | A130038L21Rik | NM_172588.2 | Mus musculus RIKEN cDNA A130038L21 gene (A130038L21Rik), mRNA.                                            |

|                |             |         |      |               |             |                                                                                       |
|----------------|-------------|---------|------|---------------|-------------|---------------------------------------------------------------------------------------|
| scl018521.14   | 30-S        | 67.6242 | 1.4  | Pcbp2         | NM_011042.1 | Mus musculus poly(rC) binding protein 2 (Pcbp2), mRNA.                                |
| scl014077.4    | 160-S       | 67.5145 | 2.17 | Fabp3         | NM_010174.1 | Mus musculus fatty acid binding protein 3, muscle and heart (Fabp3), mRNA.            |
| gi_21070949    | ref. NM_019 | 67.3619 | 2    | Ubc           | XM_147315.1 | Mus musculus ubiquitin C (Ubc), mRNA.                                                 |
| scl32464.22.1  | 107-S       | 67.1591 | 1.67 | Pde8a         | NM_008803.1 | Mus musculus phosphodiesterase 8A (Pde8a), mRNA.                                      |
| scl39118.3     | 388-S       | 67.0302 | 3.09 | Perp          | NM_022032.1 | Mus musculus PERP, TP53 apoptosis effector (Perp), mRNA.                              |
| scl0002881.1   | 47-S        | 66.8993 | 2.77 | Pdcd8         | NM_012019.2 | Mus musculus programmed cell death 8 (Pdcd8), mRNA.                                   |
| scl022335.1    | 61-S        | 66.5786 | 1.95 | Vdac3         | NM_011696.1 | Mus musculus voltage-dependent anion channel 3 (Vdac3), mRNA.                         |
| scl39983.12.1  | 110-S       | 66.2556 | 1.5  | Nup88         | NM_172394.1 | Mus musculus nucleoporin 88 (Nup88), mRNA.                                            |
| scl012385.18   | 225-S       | 66.1646 | 1.4  | Catna1        | NM_009818.1 | Mus musculus catenin alpha 1 (Catna1), mRNA.                                          |
| scl44846.7     | 0-S         | 66.1242 | 2.07 | Noi7          | NM_023554.1 | Mus musculus nucleolar protein 7 (Noi7), mRNA.                                        |
| scl46983.8     | 85-S        | 66.0701 | 1.79 | Mfng          | NM_008595.1 | Mus musculus manic fringe homolog (Drosophila) (Mfng), mRNA.                          |
| scl27730.23    | 48-S        | 65.8121 | 1.63 | Atp10d        | NM_153389.2 | Mus musculus ATPase, Class V, type 10D (Atp10d), mRNA.                                |
| scl073024.7    | 20-S        | 65.7376 | 1.6  | 2900064A13Rik | NM_133749.1 | Mus musculus RIKEN cDNA 2900064A13 gene (2900064A13Rik), mRNA.                        |
| scl0067916.1   | 299-S       | 65.612  | 1.41 | Ppap2b        | NM_080555.1 | Mus musculus phosphatidic acid phosphatase type 2B (Ppap2b), mRNA.                    |
| scl0077480.1   | 264-S       | 65.4847 | 1.52 | C330002119Rik | XM_126866.5 |                                                                                       |
| scl0003079.1   | 4-S         | 65.3952 | 1.49 | Grb14         | NM_016719.1 | Mus musculus growth factor receptor bound protein 14 (Grb14), mRNA.                   |
| scl052690.1    | 86-S        | 65.3661 | 3.28 | D12Erd771e    | NM_028262.1 | Mus musculus DNA segment, Chr 12, ERATO Doi 771, expressed (D12Erd771e), mRNA.        |
| scl41578.9     | 407-S       | 65.3087 | 1.6  | Skp1a         | NM_011543.2 | Mus musculus S-phase kinase-associated protein 1A (Skp1a), mRNA.                      |
| scl0003259.1   | 330-S       | 65.279  | 3.27 | Sh2d3c        | NM_013781.2 | Mus musculus SH2 domain containing 3C (Sh2d3c), mRNA.                                 |
| scl0239126.1   | 315-S       | 65.0925 | 1.53 | 9130217G22Rik | NM_183175.1 |                                                                                       |
| scl32855.14.1  | 3-S         | 65.041  | 1.54 | Hnrpl         | NM_177301.3 | Mus musculus heterogeneous nuclear ribonucleoprotein L (Hnrpl), mRNA.                 |
| scl070425.3    | 227-S       | 65.0279 | 1.61 | Csnk1g3       | NM_152809.1 | Mus musculus casein kinase 1, gamma 3 (Csnk1g3), mRNA.                                |
| scl0067590.2   | 244-S       | 64.2646 | 1.71 | 4930521E07Rik | NM_026260.2 | Mus musculus RIKEN cDNA 4930521E07 gene (4930521E07Rik), mRNA.                        |
| scl44775.16.1  | 15-S        | 64.0729 | 1.93 | Secisbp2      | XM_127336.2 |                                                                                       |
| scl017749.3    | 11-S        | 63.9446 | 1.43 | Polr2k        | NM_023127   | Mus musculus polymerase (RNA) II (DNA directed) polypeptide K (Polr2k), mRNA.         |
| scl066073.8    | 269-S       | 63.8043 | 1.49 | 0610040B21Rik | NM_025334.2 | Mus musculus RIKEN cDNA 0610040B21 gene (0610040B21Rik), mRNA.                        |
| scl0067096.2   | 233-S       | 63.7345 | 1.49 | 1810037K07Rik | NM_025962.1 | Mus musculus RIKEN cDNA 1810037K07 gene (1810037K07Rik), mRNA.                        |
| scl46775.6     | 475-S       | 63.524  | 1.4  | Asb8          | NM_030121.2 | Mus musculus ankyrin repeat and SOCS box-containing protein 8 (Asb8), mRNA.           |
| scl26992.46    | 0-S         | 63.3344 | 1.8  | Al481500      | NM_133901.1 | Mus musculus expressed sequence Al481500 (Al481500), mRNA.                            |
| scl022327.6    | 246-S       | 63.1732 | 1.46 | Vbp1          | NM_011692.1 | Mus musculus von Hippel-Lindau binding protein 1 (Vbp1), mRNA.                        |
| scl38900.29.1  | 38-S        | 62.8757 | 2.15 | Ranbp2        | NM_011240.2 | Mus musculus RAN binding protein 2 (Ranbp2), mRNA.                                    |
| scl074569.1    | 282-S       | 62.7754 | 1.56 | Ttc17         | NM_183106.1 |                                                                                       |
| gi_30794511    | ref. NM_013 | 62.7326 | 1.65 | Hmbs          | NM_013551.1 | Mus musculus hydroxymethylbilane synthase (Hmbs), mRNA.                               |
| scl39283.5.1   | 319-S       | 62.5259 | 1.66 | 1300017K07Rik | NM_027919.1 | Mus musculus RIKEN cDNA 1300017K07 gene (1300017K07Rik), mRNA.                        |
| scl39318.8     | 348-S       | 62.502  | 1.84 | Wbp2          | NM_016852.1 | Mus musculus WW domain binding protein 2 (Wbp2), mRNA.                                |
| scl0016956.1   | 234-S       | 62.443  | 1.37 | Lpl           | NM_008509.1 | Mus musculus lipoprotein lipase (Lpl), mRNA.                                          |
| scl49626.40.1  | 3-S         | 62.3802 | 2.5  | Xdh           | NM_011723   | Mus musculus xanthine dehydrogenase (Xdh), mRNA.                                      |
| scl37880.6.1   | 25-S        | 62.2145 | 1.51 | 1110056A04Rik | NM_182992.1 | Mus musculus RIKEN cDNA 1110056A04 gene (1110056A04Rik), mRNA.                        |
| scl50686.4.1   | 41-S        | 62.2096 | 1.39 | Mrp14         | NM_026732.2 |                                                                                       |
| scl0109077.2   | 328-S       | 62.0219 | 1.79 | 1110055N21Rik | NM_176843   | Mus musculus RIKEN cDNA 1110055N21 gene (1110055N21Rik), mRNA.                        |
| scl0012865.1   | 86-S        | 61.8452 | 1.39 | Cox7a1        | NM_009944.2 | Mus musculus cytochrome c oxidase, subunit VIIa 1 (Cox7a1), mRNA.                     |
| scl49035.10.1  | 1-S         | 61.6798 | 9.42 | Cblb          | XM_358863.1 | Mus musculus Casitas B-lineage lymphoma b (Cblb), mRNA.                               |
| scl022224.14   | 3-S         | 61.5248 | 1.63 | Usp10         | NM_009462.1 | Mus musculus ubiquitin specific protease 10 (Usp10), mRNA.                            |
| scl0014897.1   | 159-S       | 61.4799 | 1.43 | Trip12        | NM_133975.2 |                                                                                       |
| scl0075914.1   | 304-S       | 61.3949 | 1.55 | Sec15l2       | XM_355790.1 |                                                                                       |
| scl056724.5    | 33-S        | 61.2746 | 1.66 | 1200020A08Rik | NM_019936.1 | Mus musculus RIKEN cDNA 1200020A08 gene (1200020A08Rik), mRNA.                        |
| scl077634.9    | 5-S         | 61.0429 | 2.84 | Snapc3        | NM_029949.1 | Mus musculus small nuclear RNA activating complex, polypeptide 3 (Snapc3), mRNA.      |
| scl21601.6.1   | 41-S        | 60.9378 | 1.48 | Palmd         | NM_023245.2 | Mus musculus palmdelphin (Palmd), mRNA.                                               |
| scl50602.12.1  | 148-S       | 60.8811 | 1.57 | Hdgfrp2       | NM_008233.1 | Mus musculus hepatoma-derived growth factor, related protein 2 (Hdgfrp2), mRNA.       |
| scl29233.13    | 53-S        | 60.8653 | 1.61 | Wasl          | XM_133026.3 | Mus musculus Wiskott-Aldrich syndrome-like (human) (Wasl), mRNA.                      |
| scl26162.14.72 | 6-S         | 60.7904 | 1.49 | Rnf10         | NM_016698   | Mus musculus ring finger protein 10 (Rnf10), mRNA.                                    |
| scl23222.4     | 222-S       | 60.6056 | 2.24 | Ccrn4l        | NM_009834.1 | Mus musculus CCR4 carbon catabolite repression 4-like (S. cerevisiae) (Ccrn4l), mRNA. |
| scl20945.14    | 483-S       | 60.5886 | 1.51 | Epc2          | NM_172663.2 |                                                                                       |
| scl16475.25    | 424-S       | 60.3258 | 1.8  | Per2          | NM_011066.1 | Mus musculus period homolog 2 (Drosophila) (Per2), mRNA.                              |
| scl00219189.1  | 160-S       | 60.0944 | 1.59 | 1300010F03Rik | XM_127785.5 | Mus musculus RIKEN cDNA 1300010F03 gene (1300010F03Rik), mRNA.                        |
| scl070257.1    | 12-S        | 59.9968 | 1.43 | 2010107E04Rik | NM_027360.1 | Mus musculus RIKEN cDNA 2010107E04 gene (2010107E04Rik), mRNA.                        |

|               |       |         |      |               |             |                                                                                                         |
|---------------|-------|---------|------|---------------|-------------|---------------------------------------------------------------------------------------------------------|
| sci056275.3   | 18-S  | 59.9741 | 2.1  | Rbm14         | NM_019869.1 | Mus musculus RNA binding motif protein 14 (Rbm14), mRNA.                                                |
| sci29854.5.1  | 26-S  | 59.9667 | 1.79 | Aup1          | NM_007517.1 | Mus musculus ancient ubiquitous protein (Aup1), mRNA.                                                   |
| sci52870.7    | 104-S | 59.8541 | 1.88 | Ehd1          | NM_010119.3 | Mus musculus EH-domain containing 1 (Ehd1), mRNA.                                                       |
| sci0019043.2  | 303-S | 59.8267 | 1.39 | Ppm1b         | NM_011151.1 | Mus musculus protein phosphatase 1B, magnesium dependent, beta isoform (Ppm1b), mRNA.                   |
| sci054381.6   | 56-S  | 59.8264 | 1.69 | Pgcp          | NM_176073.2 | Mus musculus plasma glutamate carboxypeptidase (Pgcp), mRNA.                                            |
| sci51004.4    | 55-S  | 59.5655 | 1.52 | Sepx1         | NM_013759.1 |                                                                                                         |
| sci44723.2    | 201-S | 59.5043 | 1.41 | B230219D22Rik | NM_181278.2 | Mus musculus RIKEN cDNA B230219D22 gene (B230219D22Rik), mRNA.                                          |
| sci075705.2   | 53-S  | 59.4992 | 2.1  | Eif4b         | NM_145625.1 | Mus musculus eukaryotic translation initiation factor 4B (Eif4b), mRNA.                                 |
| sci0230866.24 | 27-S  | 59.4961 | 3.2  | C230096C10Rik | NM_146157.2 | Mus musculus RIKEN cDNA C230096C10 gene (C230096C10Rik), mRNA.                                          |
| sci49145.9    | 59-S  | 59.4087 | 2.53 | B4galt4       | NM_019804.1 | Mus musculus UDP-Gal-betaGlcNAc beta 1,4-galactosyltransferase, polypeptide 4 (B4galt4), mRNA.          |
| sci000724.1   | 245-S | 59.2955 | 2.23 | Calr3         | NM_029782.2 | Mus musculus calreticulin 3 (Calr3), mRNA.                                                              |
| sci33996.15   | 314-S | 59.2234 | 1.45 | Slc20a2       | NM_011394.1 | Mus musculus solute carrier family 20, member 2 (Slc20a2), mRNA.                                        |
| sci0051810.1  | 209-S | 58.832  | 2.56 | Hnrpu         | NM_016905.1 | Mus musculus heterogeneous nuclear ribonucleoprotein U (Hnrpu), mRNA.                                   |
| sci30789.23.1 | 30-S  | 58.7886 | 2.19 | Copb1         | NM_033370   | Mus musculus coatomer protein complex, subunit beta 1 (Copb1), mRNA.                                    |
| sci28744.16   | 312-S | 58.6418 | 1.88 | Anxa4         | NM_013471   | Mus musculus annexin A4 (Anxa4), mRNA.                                                                  |
| sci0004113.1  | 27-S  | 58.6064 | 1.36 | Mrpl33        | NM_025796.1 | Mus musculus mitochondrial ribosomal protein L33 (Mrpl33), mRNA.                                        |
| sci0012908.2  | 4-S   | 58.5935 | 1.46 | Crat          | NM_007760.1 | Mus musculus carnitine acetyltransferase (Crat), mRNA.                                                  |
| sci30654.9    | 73-S  | 58.541  | 2.15 | 1110003P22Rik | NM_144522   | Mus musculus RIKEN cDNA 1110003P22 gene (1110003P22Rik), mRNA.                                          |
| sci021981.1   | 87-S  | 58.4956 | 1.98 | Ppp1r13b      | NM_011625.1 | Mus musculus protein phosphatase 1, regulatory (inhibitor) subunit 13B (Ppp1r13b), mRNA.                |
| sci0017289.2  | 279-S | 58.326  | 2.8  | Mertk         | NM_008587.1 | Mus musculus c-mer proto-oncogene tyrosine kinase (Mertk), mRNA.                                        |
| sci43457.5.1  | 29-S  | 58.3238 | 1.37 | Mrops30       | NM_021556.2 | Mus musculus mitochondrial ribosomal protein S30 (Mrops30), mRNA.                                       |
| sci098766.1   | 292-S | 58.3065 | 1.41 | Ubadc1        | NM_133835.1 | Mus musculus ubiquitin associated domain containing 1 (Ubadc1), mRNA.                                   |
| sci077781.2   | 11-S  | 58.0195 | 2.34 | Epm2aip1      | NM_175266.2 | Mus musculus EPM2A (Iaforin) interacting protein 1 (Epm2aip1), mRNA.                                    |
| sci0019769.2  | 219-S | 57.9868 | 1.45 | Rit1          | NM_009069.2 | Mus musculus Ras-like without CAAX 1 (Rit1), mRNA.                                                      |
| sci06869.1    | 197-S | 57.2674 | 2.14 | 1200003I07Rik | XM_134220.1 | Mus musculus RIKEN cDNA 1200003I07 gene (1200003I07Rik), mRNA.                                          |
| sci0078655.1  | 180-S | 57.1289 | 1.52 | Eif3s1        | NM_144545.1 | Mus musculus eukaryotic translation initiation factor 3, subunit 1 alpha (Eif3s1), mRNA.                |
| sci35945.10   | 223-S | 56.6996 | 1.83 | Arcn1         | NM_145985.2 | Mus musculus archain 1 (Arcn1), mRNA.                                                                   |
| sci072085.4   | 41-S  | 56.6825 | 1.44 | Osgpl1        | NM_028091.2 | Mus musculus O-sialoglycoprotein endopeptidase-like 1 (Osgpl1), mRNA.                                   |
| sci066144.2   | 329-S | 56.5774 | 1.44 | Atp6v1f       | NM_025381   | Mus musculus ATPase, H+ transporting, V1 subunit F (Atp6v1f), mRNA.                                     |
| sci018538.1   | 192-S | 56.531  | 1.73 | Pcna          | NM_011045.1 | Mus musculus proliferating cell nuclear antigen (Pcna), mRNA.                                           |
| sci072284.5   | 21-S  | 56.4565 | 2.63 | Oraov1        | NM_028184.2 | Mus musculus oral cancer overexpressed 1 (Oraov1), mRNA.                                                |
| sci34490.14.1 | 30-S  | 56.4225 | 1.98 | Ces3          | NM_053200.1 | Mus musculus carboxylesterase 3 (Ces3), mRNA.                                                           |
| sci24019.5    | 109-S | 56.41   | 1.44 | Cpt2          | NM_009949   | Mus musculus carnitine palmitoyltransferase 2 (Cpt2), mRNA.                                             |
| sci015122.2   | 7-S   | 56.0896 | 2.13 | Hba-a1        | NM_008218.1 | Mus musculus hemoglobin alpha, adult chain 1 (Hba-a1), mRNA.                                            |
| sci066151.5   | 253-S | 56.0681 | 1.38 | 1110020C13Rik | NM_025385.2 | Mus musculus RIKEN cDNA 1110020C13 gene (1110020C13Rik), mRNA.                                          |
| sci072686.1   | 177-S | 56.0613 | 1.45 | Usp24         | XM_131566.5 |                                                                                                         |
| sci18579.23.1 | 24-S  | 55.9594 | 1.53 | Rrbp1         | XM_130532.1 | Mus musculus ribosome binding protein 1 (Rrbp1), mRNA.                                                  |
| sci0015078.1  | 248-S | 55.892  | 1.35 | H3f3a         | NM_008210.2 | Mus musculus H3 histone, family 3A (H3f3a), mRNA.                                                       |
| sci030057.2   | 1-S   | 55.7951 | 1.36 | Timm8b        | NM_013897.1 | Mus musculus translocase of inner mitochondrial membrane 8 homolog b (yeast) (Timm8b), mRNA.            |
| sci0237898.1  | 282-S | 55.7599 | 1.76 | 6430526O11Rik | XM_110937.4 |                                                                                                         |
| sci0067673.1  | 322-S | 55.6282 | 1.38 | Tceb2         | NM_026305.1 | Mus musculus transcription elongation factor B (SIII), polypeptide 2 (Tceb2), mRNA.                     |
| sci40755.5.1  | 55-S  | 55.4836 | 1.65 | D11Wsu47e     | NM_177777.3 | Mus musculus DNA segment, Chr 11, Wayne State University 47, expressed (D11Wsu47e), mRNA.               |
| sci015107.1   | 301-S | 55.0458 | 2.51 | Hadhsc        | NM_008212.1 | Mus musculus L-3-hydroxyacyl-Coenzyme A dehydrogenase, short chain (Hadhsc), mRNA.                      |
| sci0003902.1  | 2-S   | 55.0145 | 2.56 | Snx3          | NM_017472.2 | Mus musculus sorting nexin 3 (Snx3), mRNA.                                                              |
| sci093739.4   | 24-S  | 54.9479 | 2.33 | Gabarapl2     | NM_026693.2 | Mus musculus GABA(A) receptor-associated protein like 2 (Gabarapl2), mRNA.                              |
| sci0067618.2  | 236-S | 54.4488 | 2.08 | Aasdhpt       | NM_026276.1 | Mus musculus aminoacidipate-semialdehyde dehydrogenase-phosphopantetheinyl transferase (Aasdhpt), mRNA. |
| sci0074144.2  | 313-S | 54.3203 | 1.5  | Robo4         | NM_028783.2 | Mus musculus roundabout homolog 4 (Drosophila) (Robo4), mRNA.                                           |
| sci50134.9    | 8-S   | 54.1864 | 1.57 | Nudt3         | NM_019837.1 | Mus musculus nudix (nucleotide diphosphate linked moiety X)-type motif 3 (Nudt3), mRNA.                 |
| sci071704.9   | 277-S | 54.0878 | 1.38 | Arhgef3       | NM_027871.1 | Mus musculus Rho guanine nucleotide exchange factor (GEF) 3 (Arhgef3), mRNA.                            |
| sci34266.7    | 421-S | 53.9277 | 1.71 | 2700067E09Rik | NM_175185.2 | Mus musculus RIKEN cDNA 2700067E09 gene (2700067E09Rik), mRNA.                                          |
| sci0338522.1  | 21-S  | 53.886  | 2.44 | 9230115A19Rik | XM_110546.2 |                                                                                                         |
| sci48128.6    | 4-S   | 53.88   | 1.48 | 2900001O04Rik | NM_026213.2 | Mus musculus RIKEN cDNA 2900001O04 gene (2900001O04Rik), mRNA.                                          |
| sci0003659.1  | 24-S  | 53.7811 | 2.57 | Mef2c         | NM_025282.1 | Mus musculus myocyte enhancer factor 2C (Mef2c), mRNA.                                                  |
| sci0013640.1  | 290-S | 53.778  | 1.46 | Efna5         | NM_207654.1 | Mus musculus ephrin A5 (Efna5), transcript variant 2, mRNA.                                             |
| sci00232227.2 | 246-S | 53.7742 | 1.45 | D6Erd349e     | NM_182784.1 | Mus musculus DNA segment, Chr 6, ERATO Doi 349, expressed (D6Erd349e), mRNA.                            |
| sci00109113.1 | 250-S | 53.6581 | 1.5  | Uhrf2         | NM_144873.1 | Mus musculus ubiquitin-like, containing PHD and RING finger domains 2 (Uhrf2), mRNA.                    |

|                       |         |      |               |             |                                                                                                                           |
|-----------------------|---------|------|---------------|-------------|---------------------------------------------------------------------------------------------------------------------------|
| sci0067452.2 1-S      | 53.648  | 1.35 | 1200006O19Rik | NM_026164.1 | Mus musculus RIKEN cDNA 1200006O19 gene (1200006O19Rik), mRNA.                                                            |
| sci0056430.2 105-S    | 53.5577 | 1.49 | Rsn           | NM_019765.2 | Mus musculus restin (Reed-Steinberg cell-expressed intermediate filament-associated protein) (Rsn), mRNA.                 |
| sci29044.3 57-S       | 53.3508 | 1.83 | Ian6          | NM_153175.2 | Mus musculus immune associated nucleotide 6 (Ian6), mRNA.                                                                 |
| sci28963.13.1 27-S    | 53.2282 | 1.41 | Ni5c3         | NM_026004.1 | Mus musculus 5-nucleotidase, cytosolic III (Ni5c3), mRNA.                                                                 |
| sci29636.20.1 18-S    | 53.1752 | 1.73 | 1110061O04Rik | NM_026849   | Mus musculus RIKEN cDNA 1110061O04 gene (1110061O04Rik), mRNA.                                                            |
| sci25801.8 88-S       | 53.1287 | 1.72 | Rac1          | NM_009007.1 | Mus musculus RAS-related C3 botulinum substrate 1 (Rac1), mRNA.                                                           |
| sci16995.8.6 15-S     | 52.8353 | 1.56 | Cops5         | NM_013715.1 | Mus musculus COP9 (constitutive photomorphogenic) homolog, subunit 5 (Arabidopsis thaliana) (Cops5), mRNA.                |
| sci32687.7.1 13-S     | 52.8259 | 1.42 | Hrc           | NM_010473.1 | Mus musculus histidine rich calcium binding protein (Hrc), mRNA.                                                          |
| sci0003853.1 11-S     | 52.7947 | 1.84 | Lta4h         | NM_008517.1 | Mus musculus leukotriene A4 hydrolase (Lta4h), mRNA.                                                                      |
| sci48796.17 240-S     | 52.7099 | 1.77 | 2700067D09Rik | NM_028301.1 | Mus musculus RIKEN cDNA 2700067D09 gene (2700067D09Rik), mRNA.                                                            |
| sci00268996.2 185-S   | 52.5167 | 1.41 | Ss18          | NM_009280.1 | Mus musculus synovial sarcoma translocation, Chromosome 18 (Ss18), mRNA.                                                  |
| sci19885.7 41-S       | 52.4475 | 1.42 | Zfp313        | NM_030743.3 | Mus musculus zinc finger protein 313 (Zfp313), mRNA.                                                                      |
| sci45764.20 72-S      | 52.4451 | 1.34 | Nisch         | NM_022656.1 | Mus musculus nischarin (Nisch), mRNA.                                                                                     |
| sci071228.1 292-S     | 52.1073 | 1.7  | Dlg5          | XM_127605.4 | Mus musculus discs, large homolog 5 (Drosophila) (Dlg5), mRNA.                                                            |
| sci36423.7.11 132-S   | 51.9702 | 1.79 | Myl3          | NM_010859.1 | Mus musculus myosin, light polypeptide 3, alkali; ventricular, skeletal, slow (Myl3), mRNA.                               |
| sci067281.3 0-S       | 51.9427 | 1.44 | Rpl37         | NM_026069.1 | Mus musculus ribosomal protein L37 (Rpl37), mRNA.                                                                         |
| sci09650.7 29-S       | 51.8261 | 1.53 | 4933434E20Rik | NM_025762.1 | Mus musculus RIKEN cDNA 4933434E20 gene (4933434E20Rik), mRNA.                                                            |
| sci0056347.2 235-S    | 51.7718 | 2.04 | Eif3s8        | NM_019646.1 | Mus musculus eukaryotic translation initiation factor 3, subunit 8 (Eif3s8), mRNA.                                        |
| sci23442.8 471-S      | 51.6614 | 1.5  | 1110060F11Rik | NM_026395.1 | Mus musculus RIKEN cDNA 1110060F11 gene (1110060F11Rik), mRNA.                                                            |
| sci27262.6 658-S      | 51.5691 | 1.35 | 9130017A15Rik | NM_177242.3 | Mus musculus RIKEN cDNA 9130017A15 gene (9130017A15Rik), mRNA.                                                            |
| sci53360.9.1 13-S     | 51.5456 | 4.2  | Ms4a6b        | NM_027209.2 | Mus musculus membrane-spanning 4-domains, subfamily A, member 6B (Ms4a6b), mRNA.                                          |
| sci0003527.1 242-S    | 51.5347 | 1.4  | Ddx6          | NM_007841.2 | Mus musculus DEAD (Asp-Glu-Ala-Asp) box polypeptide 6 (Ddx6), mRNA.                                                       |
| sci067581.1 259-S     | 51.476  | 1.56 | 4930451A13Rik | NM_026254.2 | Mus musculus RIKEN cDNA 4930451A13 gene (4930451A13Rik), mRNA.                                                            |
| sci0099650.1 60-S     | 51.3261 | 1.56 | 4933434E20Rik | NM_025762.1 | Mus musculus RIKEN cDNA 4933434E20 gene (4933434E20Rik), mRNA.                                                            |
| sci50670.2.184 270-S  | 51.1817 | 1.49 | 2310039H08Rik | NM_025966.2 | Mus musculus RIKEN cDNA 2310039H08 gene (2310039H08Rik), mRNA.                                                            |
| sci34388.19 15-S      | 51.1341 | 1.53 | Ranbp10       | NM_145824.3 |                                                                                                                           |
| sci47805.7 5-S        | 51.1127 | 1.53 | Grina         | NM_023168.2 | Mus musculus glutamate receptor, ionotropic, N-methyl D-aspartate-associated protein 1 (glutamate binding) (Grina), mRNA. |
| sci48815.9.1 11-S     | 51.0109 | 7.15 | Crebbp        | XM_148699.3 | Mus musculus CREB binding protein (Crebbp), mRNA.                                                                         |
| sci0015587.1 282-S    | 50.8726 | 1.4  | Hyal2         | NM_010489.2 | Mus musculus hyaluronidase 2 (Hyal2), mRNA.                                                                               |
| sci55045.9 124-S      | 50.743  | 1.4  | Tm4sf2        | NM_019634.1 | Mus musculus transmembrane 4 superfamily member 2 (Tm4sf2), mRNA.                                                         |
| sci22978.7.1 18-S     | 50.4696 | 1.34 | Krtcap2       | NM_025327.1 | Mus musculus keratinocyte associated protein 2 (Krtcap2), mRNA.                                                           |
| sci49200.44.268 9-S   | 50.3771 | 1.96 | Mylk          | NM_139300   | Mus musculus myosin, light polypeptide kinase (Mylk), mRNA.                                                               |
| sci074383.1 23-S      | 50.3408 | 1.9  | Upap2l        | NM_028475.1 |                                                                                                                           |
| sci38628.18.8 108-S   | 50.3191 | 2.53 | Txnr1         | NM_015762.1 | Mus musculus thioredoxin reductase 1 (Txnr1), mRNA.                                                                       |
| sci42971.1 9-S        | 50.2789 | 1.84 | 0710001C05Rik | XM_203592.1 | Mus musculus RIKEN cDNA 0710001C05 gene (0710001C05Rik), mRNA.                                                            |
| sci093836.1 167-S     | 50.0768 | 3.62 | Rnf111        | NM_033604.1 | Mus musculus ring finger 111 (Rnf111), mRNA.                                                                              |
| sci52858.1.11 122-S   | 50.035  | 2.23 | Znhit2        | NM_013859.1 |                                                                                                                           |
| sci011544.1 20-S      | 50.0215 | 1.34 | Adprh         | NM_007414.2 | Mus musculus ADP-ribosylarginine hydrolase (Adprh), mRNA.                                                                 |
| sci53173.13 456-S     | 49.9947 | 1.55 | E430027O22Rik | XM_129248.4 | Mus musculus RIKEN cDNA E430027O22 gene (E430027O22Rik), mRNA.                                                            |
| sci072193.1 10-S      | 49.9048 | 1.69 | Sfrs2ip       | XM_128178.5 |                                                                                                                           |
| sci00214137.2 222-S   | 49.8937 | 1.41 | B130017I01Rik | NM_172525.1 | Mus musculus RIKEN cDNA B130017I01 gene (B130017I01Rik), mRNA.                                                            |
| sci16458.7.1 28-S     | 49.6925 | 1.65 | Thap4         | NM_025920   | Mus musculus THAP domain containing 4 (Thap4), mRNA.                                                                      |
| sci35462.25 609-S     | 49.6635 | 1.59 | Pik3cb        | NM_029094.1 | Mus musculus phosphatidylinositol 3-kinase, catalytic, beta polypeptide (Pik3cb), mRNA.                                   |
| sci21707.11 464-S     | 49.6222 | 1.68 | Ddx20         | NM_017397.2 | Mus musculus DEAD (Asp-Glu-Ala-Asp) box polypeptide 20 (Ddx20), mRNA.                                                     |
| sci18420.2 47-S       | 49.5796 | 1.55 | Bicap         | NM_016916.2 | Mus musculus bladder cancer associated protein homolog (human) (Bicap), mRNA.                                             |
| sci40289.5 205-S      | 49.5731 | 1.64 | Trim41        | NM_145377.1 | Mus musculus tripartite motif-containing 41 (Trim41), mRNA.                                                               |
| sci30301.28.1 43-S    | 49.5514 | 2.29 | AL033314      | NM_019776   | Mus musculus expressed sequence AL033314 (AL033314), mRNA.                                                                |
| sci50963.5.1 38-S     | 49.5468 | 1.6  | Mrp128        | NM_024227.2 | Mus musculus mitochondrial ribosomal protein L28 (Mrp128), nuclear gene encoding mitochondrial protein, mRNA.             |
| sci056771.4 27-S      | 49.4891 | 1.64 | Usp49         | NM_020048.2 | Mus musculus ubiquitin specific protease 49 (Usp49), mRNA.                                                                |
| sci41114.9.1 30-S     | 49.4129 | 2.04 | Car4          | NM_007607.1 | Mus musculus carbonic anhydrase 4 (Car4), mRNA.                                                                           |
| sci018139.26 3-S      | 49.2378 | 1.52 | Zfml          | NM_008717.1 |                                                                                                                           |
| sci31560.6.38 45-S    | 49.0572 | 1.53 | 1110006G06Rik | NM_028661.1 | Mus musculus RIKEN cDNA 1110006G06 gene (1110006G06Rik), mRNA.                                                            |
| sci000063.1 0-S       | 49.0359 | 1.44 | Nit1          | NM_012049.1 | Mus musculus nitrlase 1 (Nit1), mRNA.                                                                                     |
| sci50495.21.3 143-S   | 49.0079 | 1.95 | 2610511O17Rik | NM_152817.2 | Mus musculus RIKEN cDNA 2610511O17 gene (2610511O17Rik), mRNA.                                                            |
| gi_31981889_ref_NM_00 | 48.8991 | 1.48 | B2m           | NM_009735.2 | Mus musculus beta-2 microglobulin (B2m), mRNA.                                                                            |
| sci0229488.1 136-S    | 48.8716 | 2.65 | 9930021J17Rik | NM_178682.1 | Mus musculus RIKEN cDNA 9930021J17 gene (9930021J17Rik), mRNA.                                                            |



|                 |       |         |      |               |             |                                                                                                       |
|-----------------|-------|---------|------|---------------|-------------|-------------------------------------------------------------------------------------------------------|
| scl37183.6.1    | 31-S  | 48.8064 | 1.61 | Thy28         | NM_144543.1 | Mus musculus thymocyte protein thy28 (Thy28), mRNA.                                                   |
| scl068836.1     | 32-S  | 48.7753 | 1.84 | 0610006I08Rik | NM_025791.1 | Mus musculus RIKEN cDNA 0610006I08 gene (0610006I08Rik), mRNA.                                        |
| scl47911.5      | 100-S | 48.7155 | 2.98 | Nov           | NM_010930.3 | Mus musculus nephroblastoma overexpressed gene (Nov), mRNA.                                           |
| scl073373.8     | 41-S  | 48.6326 | 1.43 | 1700048E23Rik | NM_028521.1 | Mus musculus RIKEN cDNA 1700048E23 gene (1700048E23Rik), mRNA.                                        |
| scl0000100.1    | 15-S  | 48.4716 | 1.75 | Tnxb          | NM_031176.1 | Mus musculus tenascin XB (Tnxb), mRNA.                                                                |
| scl0022661.2    | 277-S | 48.4255 | 1.68 | Zfp148        | NM_011749.3 | Mus musculus zinc finger protein 148 (Zfp148), mRNA.                                                  |
| scl012757.9     | 180-S | 48.2625 | 1.91 | Cita          | NM_016760.1 | Mus musculus clathrin, light polypeptide (Lca) (Cita), mRNA.                                          |
| scl0105445.1    | 143-S | 48.1631 | 1.8  | Dock9         | XM_358315.1 |                                                                                                       |
| scl24842.10.1   | 114-S | 48.1326 | 2.45 | Rhced         | NM_011270.2 | Mus musculus Rhesus blood group CE and D (Rhced), mRNA.                                               |
| scl28291.1      | 56-S  | 48.124  | 1.38 | Tctex1        | NM_009342   | Mus musculus t-complex testis expressed 1 (Tctex1), mRNA.                                             |
| scl19927.15.1   | 16-S  | 48.1171 | 1.44 | Dnttip1       | NM_133763.1 | Mus musculus deoxynucleotidyltransferase, terminal, interacting protein 1 (Dnttip1), mRNA.            |
| scl18972.12.1   | 41-S  | 48.0692 | 1.46 | 1810020C19Rik | XM_130317.5 | Mus musculus RIKEN cDNA 1810020C19 gene (1810020C19Rik), mRNA.                                        |
| scl27294.16.1   | 239-S | 48.0001 | 1.59 | Slc24a6       | NM_133221.1 | Mus musculus solute carrier family 24 (sodium/potassium/calcium exchanger), member 6 (Slc24a6), mRNA. |
| scl53773.1.1793 | 9-S   | 47.9908 | 2.19 | AcsI4         | NM_207625.1 | Mus musculus acyl-CoA synthetase long-chain family member 4 (AcsI4), transcript variant 2, mRNA.      |
| scl23055.15.1   | 74-S  | 47.9886 | 1.35 | Plrg1         | NM_016784.2 | Mus musculus pleiotropic regulator 1, PRL1 homolog (Arabidopsis) (Plrg1), mRNA.                       |
| scl0076895.2    | 316-S | 47.8528 | 2.03 | Bicd2         | NM_029791.2 | Mus musculus bicaudal D homolog 2 (Drosophila) (Bicd2), mRNA.                                         |
| scl23588.20     | 436-S | 47.8425 | 1.39 | Plekhh2       | XM_204109.2 |                                                                                                       |
| scl49667.33.1   | 65-S  | 47.8194 | 1.44 | Ptpm          | NM_008984   | Mus musculus protein tyrosine phosphatase, receptor type, M (Ptpm), mRNA.                             |
| scl36630.14.1   | 50-S  | 47.8017 | 1.65 | Ctsh          | NM_007801   | Mus musculus cathepsin H (Ctsh), mRNA.                                                                |
| scl018641.1     | 29-S  | 47.7334 | 1.33 | PfkI          | NM_008826.2 | Mus musculus phosphofructokinase, liver, B-type (PfkI), mRNA.                                         |
| scl44186.8.1    | 13-S  | 47.6618 | 1.65 | Gmn           | NM_020567.1 | Mus musculus geminin (Gmn), mRNA.                                                                     |
| scl0105841.13   | 268-S | 47.6262 | 1.79 | E030003N15Rik | XM_128129.4 | Mus musculus RIKEN cDNA E030003N15 gene (E030003N15Rik), mRNA.                                        |
| scl0003984.1    | 492-S | 47.5785 | 1.38 | Atp2a2        | NM_009722.1 | Mus musculus ATPase, Ca++ transporting, cardiac muscle, slow twitch 2 (Atp2a2), mRNA.                 |
| scl51735.42.647 | 134-S | 47.4972 | 1.87 | 5430411K18Rik | XM_140491.4 | Mus musculus RIKEN cDNA 5430411K18 gene (5430411K18Rik), mRNA.                                        |
| scl24797.1      | 325-S | 47.4102 | 1.56 | Usp48         | NM_028344.1 |                                                                                                       |
| scl33848.6      | 136-S | 47.4095 | 1.44 | 4933411K20Rik | NM_025747.2 | Mus musculus RIKEN cDNA 4933411K20 gene (4933411K20Rik), mRNA.                                        |
| scl36105.10.25  | 13-S  | 47.3989 | 1.83 | Tbx20         | NM_194263.1 | Mus musculus T-box 20 (Tbx20), transcript variant 2, mRNA.                                            |
| scl016418.1     | 114-S | 47.3935 | 1.51 | Itgb4bp       | NM_010579.1 | Mus musculus integrin beta 4 binding protein (Itgb4bp), mRNA.                                         |
| scl0019699.2    | 228-S | 47.3549 | 2.57 | Reln          | NM_011261.1 | Mus musculus reelin (Reln), mRNA.                                                                     |
| scl23536.7      | 579-S | 47.3277 | 1.62 | 2610305D13Rik | NM_145078   | Mus musculus RIKEN cDNA 2610305D13 gene (2610305D13Rik), mRNA.                                        |
| scl069077.10    | 34-S  | 47.1041 | 2.41 | Psm11         | NM_178616.2 | Mus musculus proteasome (prosome, macropain) 26S subunit, non-ATPase, 11 (Psm11), mRNA.               |
| scl0026367.1    | 126-S | 47.099  | 1.69 | Ceacam2       | NM_007543.2 | Mus musculus CEA-related cell adhesion molecule 2 (Ceacam2), mRNA.                                    |
| scl29310.11     | 209-S | 47.0957 | 2.75 | Pdk4          | NM_013743.1 | Mus musculus pyruvate dehydrogenase kinase, isoenzyme 4 (Pdk4), mRNA.                                 |
| scl38525.3.714  | 1-S   | 47.0039 | 1.59 | Ube2n         | NM_080560.2 | Mus musculus ubiquitin-conjugating enzyme E2N (Ube2n), mRNA.                                          |
| scl015289.1     | 26-S  | 46.974  | 1.52 | Hmgb1         | NM_010439.2 | Mus musculus high mobility group box 1 (Hmgb1), mRNA.                                                 |
| scl0012934.1    | 152-S | 46.8969 | 1.32 | Dpysl2        | NM_009955.2 | Mus musculus dihydropyrimidinase-like 2 (Dpysl2), mRNA.                                               |
| scl0057261.1    | 145-S | 46.8449 | 1.38 | Brd4          | NM_020508.2 | Mus musculus bromodomain containing 4 (Brd4), mRNA.                                                   |
| scl018639.4     | 213-S | 46.831  | 8.98 | Pfkfb1        | XM_284750.2 | Mus musculus 6-phosphofructo-2-kinase/fructose-2,6-biphosphatase 1 (Pfkfb1), mRNA.                    |
| scl52515.14.1   | 211-S | 46.7833 | 1.46 | 5730455O13Rik | XM_129261.5 | Mus musculus RIKEN cDNA 5730455O13 gene (5730455O13Rik), mRNA.                                        |
| scl022333.10    | 87-S  | 46.7729 | 1.37 | Vdac1         | NM_011694   | Mus musculus voltage-dependent anion channel 1 (Vdac1), mRNA.                                         |
| scl49983.22     | 274-S | 46.7648 | 1.56 | Ddr1          | NM_007584.1 | Mus musculus discoidin domain receptor family, member 1 (Ddr1), mRNA.                                 |
| scl069612.1     | 312-S | 46.7135 | 2.93 | 2310037I24Rik | NM_133714.2 | Mus musculus RIKEN cDNA 2310037I24 gene (2310037I24Rik), mRNA.                                        |
| scl46496.6.1    | 3-S   | 46.6645 | 1.44 | Tnnc1         | NM_009393.1 |                                                                                                       |
| scl0227634.1    | 319-S | 46.6513 | 1.85 | Camsap1       | XM_129375.4 |                                                                                                       |
| scl0230126.1    | 281-S | 46.6187 | 1.58 | Shb           | XM_131399.4 | Mus musculus src homology 2 domain-containing transforming protein B (Shb), mRNA.                     |
| scl25126.19.1   | 29-S  | 46.6179 | 1.63 | Faf1          | NM_007983.2 | Mus musculus Fas-associated factor 1 (Faf1), mRNA.                                                    |
| scl40876.7.1    | 108-S | 46.5317 | 1.37 | Rad52b        | NM_025654.1 | Mus musculus RAD52 homolog B (S. cerevisiae) (Rad52b), mRNA.                                          |
| scl49542.15     | 45-S  | 46.4742 | 2    | D030028O16Rik | NM_145984.2 | Mus musculus RIKEN cDNA D030028O16 gene (D030028O16Rik), mRNA.                                        |
| scl068024.2     | 210-S | 46.2806 | 1.89 | Hist1h2bc     | NM_023422.1 | Mus musculus histone 1, H2bc (Hist1h2bc), mRNA.                                                       |
| scl18935.13     | 58-S  | 46.0453 | 4.01 | Cat           | NM_009804   | Mus musculus catalase (Cat), mRNA.                                                                    |
| scl20689.4.1    | 4-S   | 45.9934 | 1.46 | Timm13a       | NM_013899.1 | Mus musculus translocase of inner mitochondrial membrane 13 homolog a (yeast) (Timm13a), mRNA.        |
| scl0021339.1    | 180-S | 45.9842 | 1.69 | Taf1a         | NM_021466.1 | Mus musculus TATA box binding protein (Tbp)-associated factor, RNA polymerase I, A (Taf1a), mRNA.     |
| scl014009.13    | 0-S   | 45.9462 | 1.45 | Etv1          | NM_007960.1 | Mus musculus ets variant gene 1 (Etv1), mRNA.                                                         |
| scl25510.19.1   | 73-S  | 45.8103 | 1.37 | Npr2          | NM_173788.2 | Mus musculus natriuretic peptide receptor 2 (Npr2), mRNA.                                             |
| scl052609.1     | 148-S | 45.8091 | 1.53 | Cbx7          | NM_144811.2 |                                                                                                       |
| scl47841.14     | 223-S | 45.6683 | 1.5  | D15ErtD781e   | NM_145476.2 |                                                                                                       |

|               |       |         |      |               |             |                                                                                                                                     |
|---------------|-------|---------|------|---------------|-------------|-------------------------------------------------------------------------------------------------------------------------------------|
| scI0067958.1  | 275-S | 45.571  | 1.35 | 2610101N10Rik | NM_026476.1 | Mus musculus RIKEN cDNA 2610101N10 gene (2610101N10Rik), mRNA.                                                                      |
| scI0217893.6  | 312-S | 45.5247 | 1.6  | 6720425G15Rik | NM_198165.1 | Mus musculus RIKEN cDNA 6720425G15 gene (6720425G15Rik), mRNA.                                                                      |
| scI0003447.1  | 0-S   | 45.4148 | 1.77 | Rbm5          | NM_148930.2 | Mus musculus RNA binding motif protein 5 (Rbm5), mRNA.                                                                              |
| scI0026554.2  | 150-S | 45.3534 | 1.32 | Cul3          | NM_016716.2 | Mus musculus cullin 3 (Cul3), mRNA.                                                                                                 |
| scI0066691.1  | 167-S | 45.3385 | 1.41 | 4432404J10Rik | NM_025709.2 | Mus musculus RIKEN cDNA 4432404J10 gene (4432404J10Rik), mRNA.                                                                      |
| scI016971.1   | 277-S | 45.2741 | 1.94 | Lrp1          | NM_008512.1 | Mus musculus low density lipoprotein receptor-related protein 1 (Lrp1), mRNA.                                                       |
| scI36067.18   | 4-S   | 45.2041 | 1.98 | Aplp2         | NM_009691.1 | Mus musculus amyloid beta (A4) precursor-like protein 2 (Aplp2), mRNA.                                                              |
| scI0002734.1  | 23-S  | 45.1344 | 1.5  | Ssbp3         | NM_198438.1 | Mus musculus single-stranded DNA binding protein 3 (Ssbp3), transcript variant 2, mRNA.                                             |
| scI25758.6.1  | 14-S  | 45.0787 | 1.71 | 1200006F02Rik | NM_027872.1 | Mus musculus RIKEN cDNA 1200006F02 gene (1200006F02Rik), mRNA.                                                                      |
| scI20781.3.23 | 109-S | 45.0031 | 2.25 | 1700011J10Rik | NM_183265   | Mus musculus RIKEN cDNA 1700011J10 gene (1700011J10Rik), mRNA.                                                                      |
| scI0071766.1  | 324-S | 44.9829 | 2.23 | 1300006N24Rik | NM_027911.2 | Mus musculus RIKEN cDNA 1300006N24 gene (1300006N24Rik), mRNA.                                                                      |
| scI34359.7    | 33-S  | 44.9125 | 1.31 | Psmd7         | NM_010817.1 | Mus musculus proteasome (prosome, macropain) 26S subunit, non-ATPase, 7 (Psmd7), mRNA.                                              |
| scI013628.1   | 321-S | 44.8774 | 1.61 | Eef1a2        | NM_007906.2 | Mus musculus eukaryotic translation elongation factor 1 alpha 2 (Eef1a2), mRNA.                                                     |
| scI34595.13   | 308-S | 44.874  | 1.4  | Gab1          | NM_021356.2 | Mus musculus growth factor receptor bound protein 2-associated protein 1 (Gab1), mRNA.                                              |
| scI23510.49   | 38-S  | 44.7945 | 6.09 | Kif1b         | NM_207682.1 | Mus musculus kinesin family member 1B (Kif1b), transcript variant 1, mRNA.                                                          |
| scI17781.7.1  | 157-S | 44.7917 | 1.57 | D1ErtD161e    | NM_026187.3 | Mus musculus DNA segment, Chr 1, ERA TO Doi 161, expressed (D1ErtD161e), mRNA.                                                      |
| scI52780.10   | 0-S   | 44.7754 | 2.24 | Slc3a2        | NM_008577.2 | Mus musculus solute carrier family 3 (activators of dibasic and neutral amino acid transport), member 2 (Slc3a2), mRNA.             |
| scI50103.16   | 203-S | 44.6555 | 1.58 | Mtch1         | NM_019880.2 | Mus musculus mitochondrial carrier homolog 1 (C. elegans) (Mtch1), mRNA.                                                            |
| scI30063.24.1 | 0-S   | 44.5546 | 8.06 | Stk31         | NM_029916.1 | Mus musculus serine threonine kinase 31 (Stk31), mRNA.                                                                              |
| scI067345.15  | 210-S | 44.514  | 1.82 | 1700056O17Rik | NM_026101.2 | Mus musculus RIKEN cDNA 1700056O17 gene (1700056O17Rik), mRNA.                                                                      |
| scI20807.21.1 | 18-S  | 44.51   | 1.53 | Dncic2        | NM_010064   | Mus musculus dynein, cytoplasmic, intermediate chain 2 (Dncic2), mRNA.                                                              |
| scI0004082.1  | 371-S | 44.4987 | 2.56 |               | XM_355695.1 | Mus musculus similar to protocadherin 7 isoform c precursor; BH-pcdh; protocadherin 7; brain-heart protocadherin (LOC381720), mRNA. |
| scI013030.16  | 220-S | 44.3933 | 1.29 | Ctcb          | NM_007798.1 | Mus musculus cathepsin B (Ctcb), mRNA.                                                                                              |
| scI0015040.1  | 90-S  | 44.1812 | 1.49 | H2-T23        | NM_010398.1 | Mus musculus histocompatibility 2, T region locus 23 (H2-T23), mRNA.                                                                |
| scI0068915.2  | 300-S | 44.0664 | 1.7  | Vars2l        | NM_175137.3 | Mus musculus valyl-tRNA synthetase 2-like (Vars2l), mRNA.                                                                           |
| scI28548.7    | 53-S  | 43.9882 | 3    | Camk1         | NM_133926.1 | Mus musculus calcium/calmodulin-dependent protein kinase I (Camk1), mRNA.                                                           |
| scI0001170.1  | 113-S | 43.948  | 1.96 | Crbn          | NM_175357.1 |                                                                                                                                     |
| scI29467.5.1  | 148-S | 43.946  | 1.52 | Ocil          | NM_053109.1 | Mus musculus osteoclast inhibitory lectin (Ocil), mRNA.                                                                             |
| scI40004.19.1 | 140-S | 43.8797 | 1.5  | Acadvl        | NM_017366   | Mus musculus acyl-Coenzyme A dehydrogenase, very long chain (Acadvl), mRNA.                                                         |
| scI0022359.2  | 126-S | 43.8763 | 1.48 | Vldlr         | NM_013703.1 | Mus musculus very low density lipoprotein receptor (Vldlr), mRNA.                                                                   |
| scI0093762.1  | 285-S | 43.8537 | 1.64 | Smarca5       | NM_053124.2 | Mus musculus SWI/SNF related, matrix associated, actin dependent regulator of chromatin, subfamily a, member 5 (Smarca5), mRNA.     |
| scI49960.7    | 412-S | 43.6746 | 1.66 | Trim39        | NM_024468.1 | Mus musculus tripartite motif protein 39 (Trim39), mRNA.                                                                            |
| scI028036.1   | 230-S | 43.6677 | 5.63 | D3Wsu161e     | NM_138593   | Mus musculus DNA segment, Chr 3, Wayne State University 161, expressed (D3Wsu161e), mRNA.                                           |
| scI0052708.2  | 28-S  | 43.6505 | 2.54 | D12ErtD748e   | NM_144833.1 | Mus musculus DNA segment, Chr 12, ERA TO Doi 748, expressed (D12ErtD748e), mRNA.                                                    |
| scI50800.2    | 484-S | 43.5597 | 2.01 | Hspa1l        | NM_013558.1 | Mus musculus heat shock protein 1-like (Hspa1l), mRNA.                                                                              |
| scI056351.11  | 60-S  | 43.5196 | 3.16 | Tebp          | NM_019766.2 | Mus musculus telomerase binding protein, p23 (Tebp), mRNA.                                                                          |
| scI41798.24   | 462-S | 43.5069 | 1.41 | Vps54         | NM_139061.2 | Mus musculus vacuolar protein sorting 54 (yeast) (Vps54), mRNA.                                                                     |
| scI34532.9    | 187-S | 43.4295 | 1.34 | Dnaja2        | NM_019794.1 | Mus musculus DnaJ (Hsp40) homolog, subfamily A, member 2 (Dnaja2), mRNA.                                                            |
| scI0003979.1  | 54-S  | 43.3174 | 2.16 | Fastk         | NM_023229.1 | Mus musculus Fas-activated serine/threonine kinase (Fastk), mRNA.                                                                   |
| scI0056422.1  | 70-S  | 43.2816 | 1.43 | Hbs1l         | NM_019702.1 | Mus musculus Hbs1-like (S. cerevisiae) (Hbs1l), mRNA.                                                                               |
| scI26088.14.1 | 16-S  | 43.1547 | 1.61 | Aldh2         | NM_009656.1 | Mus musculus aldehyde dehydrogenase 2, mitochondrial (Aldh2), mRNA.                                                                 |
| scI0011737.2  | 249-S | 43.1168 | 1.37 | Anp32a        | NM_009672.2 | Mus musculus acidic (leucine-rich) nuclear phosphoprotein 32 family, member A (Anp32a), mRNA.                                       |
| scI016779.32  | 71-S  | 43.0674 | 1.68 | Lamb2         | NM_008483.2 | Mus musculus laminin, beta 2 (Lamb2), mRNA.                                                                                         |
| scI00319713.1 | 52-S  | 43.0642 | 2.5  | D930036B08Rik | NM_198649.1 | Mus musculus RIKEN cDNA D930036B08 gene (D930036B08Rik), mRNA.                                                                      |
| scI074270.26  | 30-S  | 42.9933 | 1.34 | Usp20         | NM_028846.1 | Mus musculus ubiquitin specific protease 20 (Usp20), mRNA.                                                                          |
| scI47705.17   | 95-S  | 42.8057 | 1.94 | L3mbtl2       | NM_145993.2 | Mus musculus l(3)mbt-like 2 (Drosophila) (L3mbtl2), mRNA.                                                                           |
| scI074549.2   | 261-S | 42.7943 | 1.82 | 9130404D08Rik | NM_028993.2 | Mus musculus RIKEN cDNA 9130404D08 gene (9130404D08Rik), mRNA.                                                                      |
| scI011668.12  | 94-S  | 42.735  | 1.4  | Aldh1a1       | NM_013467   | Mus musculus aldehyde dehydrogenase family 1, subfamily A1 (Aldh1a1), mRNA.                                                         |
| scI056529.1   | 95-S  | 42.6526 | 1.41 | Spc18         | NM_019951.1 | Mus musculus signal peptidase complex (Spc18), mRNA.                                                                                |
| scI50064.18   | 425-S | 42.605  | 2.27 | Wiz           | NM_021438.1 | Mus musculus widely-interspaced zinc finger motifs (Wiz), transcript variant 3, mRNA.                                               |
| scI073316.1   | 23-S  | 42.5176 | 1.48 | Calr3         | NM_028500.1 | Mus musculus calreticulin 3 (Calr3), mRNA.                                                                                          |
| scI0027406.2  | 22-S  | 42.5078 | 1.45 | Abcf3         | NM_013852.1 | Mus musculus ATP-binding cassette, sub-family F (GCN20), member 3 (Abcf3), mRNA.                                                    |
| scI51323.13.1 | 30-S  | 42.4783 | 1.64 | Mppe1         | NM_172630.1 | Mus musculus metallophosphoesterase 1 (Mppe1), mRNA.                                                                                |
| scI013006.15  | 44-S  | 42.4551 | 1.65 | Cspg6         | NM_007790.2 | Mus musculus chondroitin sulfate proteoglycan 6 (Cspg6), mRNA.                                                                      |
| scI0319182.1  | 4-S   | 42.3615 | 1.62 | Hist1h2bh     | NM_178197.1 | Mus musculus histone 1, H2bh (Hist1h2bh), mRNA.                                                                                     |
| scI0277333.1  | 280-S | 42.2353 | 1.71 | MGC68323      | NM_199472.1 | Mus musculus similar to glyceraldehyde-3-phosphate dehydrogenase (phosphorylating) (EC 1.2.1.12) - mouse (MGC68323), mRNA.          |

|                       |         |      |               |             |                                                                                                              |
|-----------------------|---------|------|---------------|-------------|--------------------------------------------------------------------------------------------------------------|
| sci20502.5 452-S      | 42.1345 | 2    | Lin7c         | NM_011699   | Mus musculus lin 7 homolog c (C. elegans) (Lin7c), mRNA.                                                     |
| sci22876.3 595-S      | 42.1284 | 1.31 | Mcl1          | NM_008562.2 | Mus musculus myeloid cell leukemia sequence 1 (Mcl1), mRNA.                                                  |
| sci072656.1 14-S      | 42.1264 | 1.78 | 2810013E07Rik | NM_178112.3 | Mus musculus RIKEN cDNA 2810013E07 gene (2810013E07Rik), mRNA.                                               |
| sci012867.3 17-S      | 42.1166 | 1.39 | Cox7c         | NM_007749.1 | Mus musculus cytochrome c oxidase, subunit VIIc (Cox7c), mRNA.                                               |
| sci078325.1 150-S     | 42.1002 | 1.45 | 2700092H06Rik | XM_132529.2 | Mus musculus RIKEN cDNA 2700092H06 gene (2700092H06Rik), mRNA.                                               |
| sci0066660.1 237-S    | 42.0539 | 1.39 | 5730555F13Rik | NM_025690.1 | Mus musculus RIKEN cDNA 5730555F13 gene (5730555F13Rik), mRNA.                                               |
| sci31352.29.1 249-S   | 42.0242 | 1.76 | Ush1c         | NM_023649.1 | Mus musculus Usher syndrome 1C homolog (human) (Ush1c), transcript variant a1, mRNA.                         |
| sci0026895.1 34-S     | 41.9523 | 1.74 | Cops7b        | NM_172974.1 | Mus musculus COP9 (constitutive photomorphogenic) homolog, subunit 7b (Arabidopsis thaliana) (Cops7b), mRNA. |
| sci016865.11 15-S     | 41.9042 | 1.73 | Lgtn          | NM_010709.1 | Mus musculus ligatin (Lgtn), mRNA.                                                                           |
| sci36130.5 341-S      | 41.8983 | 1.6  | Rab3d         | NM_031874.3 | Mus musculus RAB3D, member RAS oncogene family (Rab3d), mRNA.                                                |
| sci054610.1 1-S       | 41.8693 | 2.39 | Tbc1d8        | NM_018775.1 | Mus musculus TBC1 domain family, member 8 (Tbc1d8), mRNA.                                                    |
| sci33920.14 231-S     | 41.8662 | 1.43 | Gsr           | NM_010344.3 | Mus musculus glutathione reductase 1 (Gsr), mRNA.                                                            |
| sci27178.12.102 2-S   | 41.8107 | 1.32 | Cct6a         | NM_009838   | Mus musculus chaperonin subunit 6a (zeta) (Cct6a), mRNA.                                                     |
| sci0078785.2 44-S     | 41.7745 | 1.31 | 1700024K14Rik | NM_030179.2 | Mus musculus RIKEN cDNA 1700024K14 gene (1700024K14Rik), mRNA.                                               |
| sci0016969.1 242-S    | 41.758  | 2.98 | Zbtb7         | NM_010731.1 | Mus musculus zinc finger and BTB domain containing 7 (Zbtb7), mRNA.                                          |
| sci37776.6 58-S       | 41.7111 | 1.37 | D10Jhu81e     | NM_138601.1 | Mus musculus DNA segment, Chr 10, Johns Hopkins University 81 expressed (D10Jhu81e), mRNA.                   |
| sci34649.4 549-S      | 41.665  | 1.97 | Crsp7         | NM_027485.1 | Mus musculus cofactor required for Sp1 transcriptional activation, subunit 7 (Crsp7), mRNA.                  |
| sci015024.2 236-S     | 41.6284 | 2.15 | H2-T10        | NM_010395.2 | Mus musculus histocompatibility 2, T region locus 10 (H2-T10), mRNA.                                         |
| sci0239706.7 17-S     | 41.5751 | 1.49 | BC024814      | NM_146247   | Mus musculus cDNA sequence BC024814 (BC024814), mRNA.                                                        |
| sci066725.8 229-S     | 41.5521 | 1.86 | 4921513O20Rik | NM_025730.1 | Mus musculus RIKEN cDNA 4921513O20 gene (4921513O20Rik), mRNA.                                               |
| sci34704.4 282-S      | 41.5099 | 1.47 | C630013N10Rik | NM_172052.1 | Mus musculus RIKEN cDNA C630013N10 gene (C630013N10Rik), mRNA.                                               |
| sci40985.2.1 86-S     | 41.461  | 2.74 | Hoxb4         | NM_010459   | Mus musculus homeo box B4 (Hoxb4), mRNA.                                                                     |
| sci000488.1 1423-S    | 41.4572 | 5.86 | Hectd2        | NM_172637.1 |                                                                                                              |
| sci0099237.1 73-S     | 41.4011 | 1.99 | Tm9sf4        | NM_133847.2 |                                                                                                              |
| sci017169.9 120-S     | 41.3394 | 1.69 | Mark3         | NM_021516.1 | Mus musculus MAP/microtubule affinity-regulating kinase 3 (Mark3), mRNA.                                     |
| sci050850.17 73-S     | 41.1766 | 1.52 | Spg4          | NM_016962.1 | Mus musculus spastic paraplegia 4 homolog (human) (Spg4), mRNA.                                              |
| sci0272428.22 84-S    | 41.1606 | 3.82 | C730027J19Rik | NM_178758.2 | Mus musculus RIKEN cDNA C730027J19 gene (C730027J19Rik), mRNA.                                               |
| sci012520.7 274-S     | 41.1309 | 1.38 | Cd81          | NM_133655.1 | Mus musculus CD 81 antigen (Cd81), mRNA.                                                                     |
| sci32299.7.1 25-S     | 41.0927 | 1.69 | Stard10       | NM_019990.1 | Mus musculus START domain containing 10 (Stard10), mRNA.                                                     |
| sci012389.5 102-S     | 41.0776 | 1.28 | Cav1          | NM_007616.2 |                                                                                                              |
| sci0231225.1 255-S    | 41.0727 | 1.46 | 4932414K18Rik | NM_173764   | Mus musculus RIKEN cDNA 4932414K18 gene (4932414K18Rik), mRNA.                                               |
| sci000076.1 111 REVCC | 41.0475 | 1.55 | D11Wsu99e     | NM_013581.2 | Mus musculus DNA segment, Chr 11, Wayne State University 99, expressed (D11Wsu99e), mRNA.                    |
| sci18647.1 62-S       | 40.9424 | 1.33 | Cenpb         | NM_007682.2 | Mus musculus centromere autoantigen B (Cenpb), mRNA.                                                         |
| sci54847.11 478-S     | 40.9401 | 1.33 | Slc6a8        | NM_133987.1 | Mus musculus solute carrier family 6 (neurotransmitter transporter, creatine), member 8 (Slc6a8), mRNA.      |
| sci0068965.1 205-S    | 40.888  | 2.37 | 1500010G04Rik | NM_173366.1 | Mus musculus RIKEN cDNA 1500010G04 gene (1500010G04Rik), mRNA.                                               |
| sci0106042.1 246-S    | 40.8718 | 1.37 | Prickle1      | XM_147935.1 | Mus musculus prickle like 1 (Drosophila) (Prickle1), mRNA.                                                   |
| sci33340.4 635-S      | 40.8449 | 2.06 | Txn14b        | NM_175646.2 |                                                                                                              |
| sci35708.10 49-S      | 40.8387 | 1.57 | Smad3         | NM_016769   |                                                                                                              |
| sci0001100.1 114-S    | 40.8268 | 1.59 | Aqp1          | NM_007472.1 | Mus musculus aquaporin 1 (Aqp1), mRNA.                                                                       |
| sci066361.1 72-S      | 40.7606 | 2.11 | 2310008M20Rik | NM_025512.2 | Mus musculus RIKEN cDNA 2310008M20 gene (2310008M20Rik), mRNA.                                               |
| sci0014567.2 263-S    | 40.7322 | 1.36 | Gdi1          | NM_010273.1 | Mus musculus guanosine diphosphate (GDP) dissociation inhibitor 1 (Gdi1), mRNA.                              |
| sci50887.7 31-S       | 40.6955 | 1.29 | Tex27         | NM_148926.1 | Mus musculus testis expressed gene 27 (Tex27), mRNA.                                                         |
| sci012153.1 23-S      | 40.6111 | 2.09 | Bmp1          | NM_009755.2 | Mus musculus bone morphogenetic protein 1 (Bmp1), mRNA.                                                      |
| sci30418.7 5-S        | 40.5607 | 2.93 | Asb4          | NM_023048.4 | Mus musculus ankyrin repeat and SOCS box-containing protein 4 (Asb4), mRNA.                                  |
| sci33012.5.1 34-S     | 40.5471 | 1.38 | Dmwd          | NM_010058.1 | Mus musculus dystrophia myotonica-containing WD repeat motif (Dmwd), mRNA.                                   |
| sci065019.1 21-S      | 40.5162 | 1.27 | Rpl23         | NM_022891.1 | Mus musculus ribosomal protein L23 (Rpl23), mRNA.                                                            |
| sci0002109.1 724-S    | 40.4556 | 1.39 | Dnajb4        | NM_025926.1 | Mus musculus DnaJ (Hsp40) homolog, subfamily B, member 4 (Dnajb4), mRNA.                                     |
| sci34424.10 15-S      | 40.3359 | 1.54 | Tk2           | NM_021028.2 | Mus musculus thymidine kinase 2, mitochondrial (Tk2), mRNA.                                                  |
| sci011758.1 35-S      | 40.2604 | 1.47 | Prdx6         | NM_007453.2 | Mus musculus peroxiredoxin 6 (Prdx6), mRNA.                                                                  |
| sci0066704.2 280-S    | 40.2225 | 1.79 | 4921506I22Rik | NM_025717.2 | Mus musculus RIKEN cDNA 4921506I22 gene (4921506I22Rik), mRNA.                                               |
| sci27811.23.1 37-S    | 40.2043 | 1.45 | 2810453K03Rik | NM_144517.2 | Mus musculus RIKEN cDNA 2810453K03 gene (2810453K03Rik), mRNA.                                               |
| sci16978.3 2-S        | 40.1817 | 2.4  | Msc           | NM_010827   | Mus musculus musculin (Msc), mRNA.                                                                           |
| sci28573.11 3-S       | 40.1466 | 1.52 | Crbn          | NM_175357.1 |                                                                                                              |
| sci070652.1 1-S       | 40.1281 | 1.93 | 5730537D05Rik | NM_027495.2 | Mus musculus RIKEN cDNA 5730537D05 gene (5730537D05Rik), mRNA.                                               |
| sci45667.15 40-S      | 40.0914 | 1.31 | Plekhc1       | NM_146054.1 | Mus musculus pleckstrin homolog domain containing, family C (with FERM domain) member 1 (Plekhc1), mRNA.     |
| sci0016599.2 295-S    | 40.0811 | 1.46 | Klf3          | NM_008453.2 | Mus musculus Kruppel-like factor 3 (basic) (Klf3), mRNA.                                                     |

|                           |         |      |               |             |                                                                                                                            |
|---------------------------|---------|------|---------------|-------------|----------------------------------------------------------------------------------------------------------------------------|
| sci056372.5 328-S         | 39.9773 | 3.67 | 1110004F10Rik | NM_019772.1 | Mus musculus RIKEN cDNA 1110004F10 gene (1110004F10Rik), mRNA.                                                             |
| sci075786.2 11-S          | 39.9581 | 5.88 | 4930432B04Rik | XM_130287.5 | Mus musculus RIKEN cDNA 4930432B04 gene (4930432B04Rik), mRNA.                                                             |
| sci052856.8 265-S         | 39.8619 | 1.72 | Gtbbp5        | NM_181424.2 | Mus musculus GTP binding protein 5 (Gtbbp5), mRNA.                                                                         |
| sci30362.8.2 277-S        | 39.8456 | 1.46 | Kdt1          | NM_175088.2 | Mus musculus kidney cell line derived transcript 1 (Kdt1), mRNA.                                                           |
| sci066448.4 32-S          | 39.8177 | 1.28 | Mrlp20        | NM_025570.1 | Mus musculus mitochondrial ribosomal protein L20 (Mrlp20), mRNA.                                                           |
| sci071779.8 36-S          | 39.7897 | 1.71 | Mir           | NM_027920.3 |                                                                                                                            |
| sci28198.16.9 0-S         | 39.7625 | 2.22 | 4933424B01Rik | NM_138757.1 | Mus musculus RIKEN cDNA 4933424B01 gene (4933424B01Rik), mRNA.                                                             |
| sci35530.18 2-S           | 39.6905 | 1.29 | Mod1          | NM_008615   | Mus musculus malic enzyme, supernatant (Mod1), mRNA.                                                                       |
| sci011981.2 30-S          | 39.6237 | 1.68 | Atp9a         | NM_015731.2 | Mus musculus ATPase, class II, type 9A (Atp9a), mRNA.                                                                      |
| sci0001999.1 48-S         | 39.5401 | 1.4  | 4933434E20Rik | NM_025762.1 | Mus musculus RIKEN cDNA 4933434E20 gene (4933434E20Rik), mRNA.                                                             |
| sci0069740.2 2-S          | 39.5395 | 2.4  | 2410012M04Rik | NM_027193.2 | Mus musculus RIKEN cDNA 2410012M04 gene (2410012M04Rik), mRNA.                                                             |
| sci40072.13 201-S         | 39.5068 | 1.4  | Map2k4        | NM_009157   | Mus musculus mitogen activated protein kinase kinase 4 (Map2k4), mRNA.                                                     |
| sci066860.1 6-S           | 39.4994 | 1.42 | 1200003E16Rik | XM_130249.3 | Mus musculus RIKEN cDNA 1200003E16 gene (1200003E16Rik), mRNA.                                                             |
| sci20100.20 8-S           | 39.3951 | 2.39 | Tm9sf4        | NM_133847.2 |                                                                                                                            |
| sci20254.4.1 23-S         | 39.3742 | 1.66 | 1110034G24Rik | XM_130388.3 | Mus musculus RIKEN cDNA 1110034G24 gene (1110034G24Rik), mRNA.                                                             |
| sci30620.3.1 5-S          | 39.3737 | 1.41 | Cox6a2        | NM_009943.1 | Mus musculus cytochrome c oxidase, subunit VI a, polypeptide 2 (Cox6a2), mRNA.                                             |
| sci24433.7.1 53-S         | 39.3319 | 1.56 | Bag1          | NM_009736.1 | Mus musculus Bcl2-associated athanogene 1 (Bag1), mRNA.                                                                    |
| sci017776.1 270-S         | 39.28   | 2.01 | Mast2         | NM_008641.1 | Mus musculus microtubule associated serine/threonine kinase 2 (Mast2), mRNA.                                               |
| sci43301.1.2269 3-S       | 39.2581 | 3.44 | Gdap10        | NM_010268.1 | Mus musculus ganglioside-induced differentiation-associated-protein 10 (Gdap10), mRNA.                                     |
| sci33219.11.1 14-S        | 39.187  | 1.55 | BC021611      | NM_144932.2 | Mus musculus cDNA sequence BC021611 (BC021611), mRNA.                                                                      |
| sci26322.8.1 52-S         | 39.1578 | 3.72 | 2310002F18Rik | XM_132218.3 | Mus musculus RIKEN cDNA 2310002F18 gene (2310002F18Rik), mRNA.                                                             |
| sci23193.10.1 8-S         | 39.111  | 1.37 | Alg5          | NM_025442.1 | Mus musculus asparagine-linked glycosylation 5 homolog (yeast, dolichyl-phosphate beta-glucosyltransferase) (Alg5), mRNA.  |
| sci015191.7 7-S           | 39.0876 | 1.63 | Hdgl          | NM_008231.2 | Mus musculus hepatoma-derived growth factor (Hdgl), mRNA.                                                                  |
| sci22997.10 102-S         | 39.0798 | 1.42 | Al663987      | NM_033526.1 | Mus musculus expressed sequence Al663987 (Al663987), mRNA.                                                                 |
| sci24928.17 534-S         | 39.0554 | 1.83 | Phc2          | NM_018774.1 | Mus musculus polyhomeotic-like 2 (Drosophila) (Phc2), mRNA.                                                                |
| sci0022608.1 233-S        | 39.005  | 1.27 | Nsep1         | NM_011732.1 | Mus musculus nuclease sensitive element binding protein 1 (Nsep1), mRNA.                                                   |
| sci31410.39.1 13-S        | 38.9261 | 2.06 | Myh14         | NM_028021.1 |                                                                                                                            |
| sci0057874.1 260-S        | 38.9175 | 1.32 | AW742319      | NM_021345.1 | Mus musculus expressed sequence AW742319 (AW742319), mRNA.                                                                 |
| sci016857.8 15-S          | 38.8584 | 2.08 | Lgals4        | NM_010706.1 | Mus musculus lectin, galactose binding, soluble 6 (Lgals6), mRNA.                                                          |
| sci19291.9.1 25-S         | 38.8546 | 3.05 | Nmi           | NM_019401.1 | Mus musculus N-myc (and STAT) interactor (Nmi), mRNA.                                                                      |
| sci25917.6 37-S           | 38.7355 | 1.5  | Ywhag         | NM_018871.2 | Mus musculus 3-monooxygenase/tryptophan 5-monooxygenase activation protein, gamma polypeptide (Ywhag), mRNA.               |
| sci21772.5 341-S          | 38.7164 | 8.95 | Hsd3b1        | NM_008293.1 | Mus musculus hydroxysteroid dehydrogenase-1, delta<sup>-5</sup>-3-beta (Hsd3b1), mRNA.                                     |
| sci54377.16.1 8-S         | 38.651  | 1.42 | Maob          | NM_172778.1 | Mus musculus monoamine oxidase B (Maob), mRNA.                                                                             |
| sci057905.1 53-S          | 38.6473 | 1.79 | 5830446M03Rik | NM_133934.2 | Mus musculus RIKEN cDNA 5830446M03 gene (5830446M03Rik), mRNA.                                                             |
| sci23528.23 0-S           | 38.6268 | 1.28 | Mfn2          | NM_133201.1 | Mus musculus mitofusin 2 (Mfn2), mRNA.                                                                                     |
| sci33420.4 697-S          | 38.61   | 1.57 | Nol3          | NM_030152.2 | Mus musculus nucleolar protein 3 (apoptosis repressor with CARD domain) (Nol3), mRNA.                                      |
| sci31074.15.1 32-S        | 38.5691 | 1.98 | Fah           | NM_010176.1 | Mus musculus fumarylacetoacetate hydrolase (Fah), mRNA.                                                                    |
| sci16317.12 198-S         | 38.5161 | 1.48 | Mapkapk2      | NM_008551.1 | Mus musculus MAP kinase-activated protein kinase 2 (Mapkapk2), mRNA.                                                       |
| sci40024.13.1 29-S        | 38.4862 | 1.57 | Senp3         | NM_030702.2 | Mus musculus SUMO/sentrin specific protease 3 (Senp3), mRNA.                                                               |
| sci0019046.2 75-S         | 38.4632 | 3.86 | Ppp1cb        | NM_172707.1 | Mus musculus protein phosphatase 1, catalytic subunit, beta isoform (Ppp1cb), mRNA.                                        |
| sci45413.15 171-S         | 38.4438 | 1.47 | Elp3          | NM_028811.1 | Mus musculus elongation protein 3 homolog (S. cerevisiae) (Elp3), mRNA.                                                    |
| sci23489.7 25-S           | 38.4118 | 1.74 | 4930422J18Rik | NM_029035.2 | Mus musculus RIKEN cDNA 4930422J18 gene (4930422J18Rik), mRNA.                                                             |
| sci23509.31 82-S          | 38.4    | 1.36 | Ube4b         | NM_022022.1 | Mus musculus ubiquitination factor E4B, UFD2 homolog (S. cerevisiae) (Ube4b), mRNA.                                        |
| sci020239.25 113-S        | 38.3891 | 1.3  | Sca2          | NM_009125.1 | Mus musculus spinocerebellar ataxia 2 homolog (human) (Sca2), mRNA.                                                        |
| sci45160.32 9-S           | 38.345  | 1.83 | Abcc4         | XM_139262.2 | Mus musculus ATP-binding cassette, sub-family C (CFTR/MRP), member 4 (Abcc4), mRNA.                                        |
| sci0071720.1 33-S         | 38.344  | 2.1  | Osbpl3        | NM_027881.1 | Mus musculus oxysterol binding protein-like 3 (Osbpl3), mRNA.                                                              |
| sci41017.13 82-S          | 38.2669 | 1.49 | Ppp1r9b       | NM_172261.1 | Mus musculus protein phosphatase 1, regulatory subunit 9B (Ppp1r9b), mRNA.                                                 |
| sci00100986.1 185-S       | 38.247  | 1.47 | Akap9         | NM_194462.1 | Mus musculus A kinase (PRKA) anchor protein (yotiao) 9 (Akap9), mRNA.                                                      |
| sci32196.12 2-S           | 38.2211 | 7.62 | Wee1          | NM_009516.2 | Mus musculus wee 1 homolog (S. pombe) (Wee1), mRNA.                                                                        |
| sci00319604.2 16-S        | 38.2018 | 1.87 | B930006L02Rik | NM_178764.2 | Mus musculus RIKEN cDNA B930006L02 gene (B930006L02Rik), mRNA.                                                             |
| gi_21070949 ref NM_010100 | 38.183  | 1.72 | Ubc           | XM_147315.1 | Mus musculus ubiquitin C (Ubc), mRNA.                                                                                      |
| sci20734.8 508-S          | 38.1584 | 1.48 | Plekha3       | NM_031256.2 | Mus musculus pleckstrin homology domain-containing, family A (phosphoinositide binding specific) member 3 (Plekha3), mRNA. |
| sci19758.9.1 11-S         | 38.11   | 1.78 | Tcea2         | NM_009326   | Mus musculus transcription elongation factor A (SII), 2 (Tcea2), mRNA.                                                     |
| sci012314.1 140-S         | 38.1091 | 1.29 | Calm2         | NM_007589   | Mus musculus calmodulin 2 (Calm2), mRNA.                                                                                   |
| sci47044.6.24 75-S        | 38.0915 | 1.35 | 0610041B22Rik | NM_025340.1 | Mus musculus RIKEN cDNA 0610041B22 gene (0610041B22Rik), mRNA.                                                             |
| sci43966.3 250-S          | 38.0703 | 2.33 | Nfil3         | NM_017373.2 | Mus musculus nuclear factor, interleukin 3, regulated (Nfil3), mRNA.                                                       |

|                  |        |         |      |               |             |                                                                                                                             |
|------------------|--------|---------|------|---------------|-------------|-----------------------------------------------------------------------------------------------------------------------------|
| scl29631.10      | 10-S   | 37.9904 | 1.43 | Crelid1       | NM_133930.1 | Mus musculus cysteine-rich with EGF-like domains 1 (Crelid1), mRNA.                                                         |
| scl0003894.1     | 174-S  | 37.9889 | 1.35 | Amid          | NM_153779.1 | Mus musculus apoptosis-inducing factor (AIF)-like mitochondrion-associated inducer of death (Amid), mRNA.                   |
| scl31746.2.26    | 98-S   | 37.887  | 1.52 | 1500016L11Rik | NM_026885.1 | Mus musculus RIKEN cDNA 1500016L11 gene (1500016L11Rik), mRNA.                                                              |
| scl34858.4       | 85-S   | 37.7698 | 1.8  | Slc25a4       | XM_134169.4 | Mus musculus solute carrier family 25 (mitochondrial carrier; adenine nucleotide translocator), member 4 (Slc25a4), mRNA.   |
| scl44140.2       | 304-S  | 37.7418 | 1.98 | Uqcrfs1       | NM_025710.1 | Mus musculus ubiquinol-cytochrome c reductase, Rieske iron-sulfur polypeptide 1 (Uqcrfs1), mRNA.                            |
| scl0002744.1     | 1-S    | 37.7412 | 1.39 | Zfyve9        | XM_131643.4 |                                                                                                                             |
| scl33121.3       | 245-S  | 37.7372 | 1.84 | Zfp524        | NM_025324.1 |                                                                                                                             |
| scl42532.6       | 0-S    | 37.7208 | 1.99 | Tm4sf13       | NM_025359.2 | Mus musculus transmembrane 4 superfamily member 13 (Tm4sf13), mRNA.                                                         |
| scl0106393.1     | 61-S   | 37.718  | 1.45 | 9830004M20Rik | NM_175347.3 |                                                                                                                             |
| scl022110.2      | 300-S  | 37.557  | 3.02 | Tsply1        | NM_009433.2 |                                                                                                                             |
| scl26990.11.129  | 69-S   | 37.5414 | 1.4  | Arpc1a        | NM_019767.1 | Mus musculus actin related protein 2/3 complex, subunit 1A (Arpc1a), mRNA.                                                  |
| scl29521.11      | 18-S   | 37.52   | 1.37 | Grcc3f        | NM_145130.1 | Mus musculus gene rich cluster, C3f gene (Grcc3f), mRNA.                                                                    |
| scl015207.2      | 11-S   | 37.4322 | 8.39 | Hes3          | NM_008237.1 | Mus musculus hairy and enhancer of split 3 (Drosophila) (Hes3), mRNA.                                                       |
| scl0320949.2     | 42-S   | 37.3911 | 2.53 | D830039M14Rik | NM_177297.2 | Mus musculus RIKEN cDNA D830039M14 gene (D830039M14Rik), mRNA.                                                              |
| scl0021843.2     | 5-S    | 37.35   | 1.58 | Tial1         | NM_009383.1 | Mus musculus Tial1 cytotoxic granule-associated RNA binding protein-like 1 (Tial1), mRNA.                                   |
| scl24063.27.1    | 21-S   | 37.2842 | 1.57 | Jak1          | NM_146145.1 | Mus musculus Janus kinase 1 (Jak1), mRNA.                                                                                   |
| scl48140.10      | 39-S   | 37.2533 | 1.92 | Sepp1         | NM_009155.2 | Mus musculus selenoprotein P, plasma, 1 (Sepp1), mRNA.                                                                      |
| scl30948.10      | 348-S  | 37.2442 | 1.78 | Al849286      | XM_194372.3 | Mus musculus expressed sequence Al849286 (Al849286), mRNA.                                                                  |
| scl0053413.2     | 143-S  | 37.2385 | 1.38 | Exoc7         | NM_016857.1 | Mus musculus exocyst complex component 7 (Exoc7), mRNA.                                                                     |
| scl0012192.2     | 207-S  | 37.2296 | 1.47 | Zfp361l1      | NM_007564.2 | Mus musculus zinc finger protein 36, C3H type-like 1 (Zfp361l1), mRNA.                                                      |
| scl094112.1      | 23-S   | 37.1848 | 1.86 | Pcqap         | NM_033609.1 | Mus musculus positive cofactor 2, multiprotein complex, glutamine/Q-rich-associated protein (Pcqap), mRNA.                  |
| scl41521.1.2     | 20-S   | 37.1689 | 7.9  | 4930438A08Rik | XM_126175.2 | Mus musculus RIKEN cDNA 4930438A08 gene (4930438A08Rik), mRNA.                                                              |
| scl17286.15.1    | 2-S    | 37.1332 | 5.17 | Selp          | NM_011347.1 | Mus musculus selectin, platelet (Selp), mRNA.                                                                               |
| scl42127.12.1    | 16-S   | 37.1256 | 1.42 | Lgmn          | NM_011175.1 | Mus musculus legumain (Lgmn), mRNA.                                                                                         |
| scl18417.10.1    | 104-S  | 37.1114 | 2.3  | 2610036D13Rik | NM_029282.1 | Mus musculus RIKEN cDNA 2610036D13 gene (2610036D13Rik), mRNA.                                                              |
| scl24532.13      | 158-S  | 37.1014 | 2.75 | Decr1         | NM_026172.3 | Mus musculus 2,4-dienoyl CoA reductase 1, mitochondrial (Decr1), mRNA.                                                      |
| scl013864.1      | 5-S    | 36.9608 | 1.44 | Nr2f6         | NM_010150   | Mus musculus nuclear receptor subfamily 2, group F, member 6 (Nr2f6), mRNA.                                                 |
| scl0054216.2     | 72-S   | 36.9529 | 2.85 | Pcdh7         | NM_018764.1 | Mus musculus protocadherin 7 (Pcdh7), mRNA.                                                                                 |
| scl52593.10.1    | 23-S   | 36.9421 | 1.34 | 5033414D02Rik | NM_026362.1 | Mus musculus RIKEN cDNA 5033414D02 gene (5033414D02Rik), mRNA.                                                              |
| scl50203.3       | 209-S  | 36.9341 | 1.71 | Gfer          | NM_023040.2 | Mus musculus growth factor, erv1 (S. cerevisiae)-like (augmenter of liver regeneration) (Gfer), transcript variant 2, mRNA. |
| scl00217692.2    | 267-S  | 36.9066 | 1.82 | Sipa11l1      | NM_172579.1 | Mus musculus signal-induced proliferation-associated 1 like 1 (Sipa11l1), mRNA.                                             |
| scl0229622.3     | 21-S   | 36.8881 | 1.74 | 9430063L05Rik | NM_178080.3 | Mus musculus RIKEN cDNA 9430063L05 gene (9430063L05Rik), mRNA.                                                              |
| scl0081877.2     | 114-S  | 36.8879 | 1.69 | Tnxb          | NM_031176.1 | Mus musculus tenascin XB (Tnxb), mRNA.                                                                                      |
| scl00107932.1    | 52-S   | 36.886  | 1.41 | Chd4          | NM_145979.1 | Mus musculus chromodomain helicase DNA binding protein 4 (Chd4), mRNA.                                                      |
| scl068655.1      | 199-S  | 36.8845 | 4.5  | 1110027O12Rik | XM_354975.1 |                                                                                                                             |
| scl53590.23.1    | 11-S   | 36.836  | 2.76 | Odf1          | NM_177429.2 | Mus musculus oral-facial-digital syndrome 1 gene homolog (human) (Odf1), mRNA.                                              |
| scl00234839.1    | 51-S   | 36.7976 | 1.59 | 2310061F22Rik | XM_134537.3 | Mus musculus RIKEN cDNA 2310061F22 gene (2310061F22Rik), mRNA.                                                              |
| scl24261.12.1    | 29-S   | 36.7952 | 1.79 | Alad          | NM_008525.3 | Mus musculus aminolevulinate, delta-, dehydratase (Alad), mRNA.                                                             |
| scl056278.9      | 3-S    | 36.7872 | 1.34 | Gkap1         | NM_019832.2 |                                                                                                                             |
| scl0014082.2     | 318-S  | 36.6838 | 1.49 | Fadd          | NM_010175.2 | Mus musculus Fas (TNFRSF6)-associated via death domain (Fadd), mRNA.                                                        |
| scl075956.6      | 20-S   | 36.5954 | 1.5  | Srrm2         | NM_175229.2 | Mus musculus serine/arginine repetitive matrix 2 (Srrm2), mRNA.                                                             |
| scl50069.32.1454 | 21-S   | 36.5947 | 1.83 | Notch3        | NM_008716.1 | Mus musculus Notch gene homolog 3 (Drosophila) (Notch3), mRNA.                                                              |
| scl23433.18.1    | 222-S  | 36.5898 | 1.35 | 2210008I11Rik | NM_145124   | Mus musculus RIKEN cDNA 2210008I11 gene (2210008I11Rik), mRNA.                                                              |
| scl40603.7.49    | 6-S    | 36.5305 | 1.35 | Drg1          | NM_007879.1 | Mus musculus developmentally regulated GTP binding protein 1 (Drg1), mRNA.                                                  |
| GI_23346428-S    |        | 36.4172 | 7.65 | Myt1          | NM_008665.2 | Mus musculus myelin transcription factor 1 (Myt1), mRNA.                                                                    |
| scl27246.12.1    | 228-S  | 36.3951 | 1.42 | BC035291      | NM_177581.2 | Mus musculus cDNA sequence BC035291 (BC035291), mRNA.                                                                       |
| scl0003163.1     | 0-S    | 36.3859 | 1.41 | Mmrp19        | NM_019735.2 | Mus musculus monocyte macrophage 19 (Mmrp19), mRNA.                                                                         |
| scl0001572.1     | 0-S    | 36.3684 | 1.36 | Rai12         | NM_018740.1 | Mus musculus retinoic acid induced 12 (Rai12), mRNA.                                                                        |
| scl0002068.1     | 1-S    | 36.3068 | 4    | Casp6         | NM_009811.2 | Mus musculus caspase 6 (Casp6), mRNA.                                                                                       |
| scl36431.25.1    | 92-S   | 36.1953 | 1.75 | Scap          | XM_135190.4 | Mus musculus Sreb cleavage-activating protein (Scap), mRNA.                                                                 |
| scl014057.6      | 27-S   | 36.1724 | 1.47 | Sixn1         | NM_027324.2 | Mus musculus sideroflexin 1 (Sixn1), mRNA.                                                                                  |
| scl000601.1      | 1063-S | 36.164  | 1.51 | Siat5         | NM_178048.2 | Mus musculus sialyltransferase 5 (Siat5), mRNA.                                                                             |
| scl39906.6       | 377-S  | 36.0951 | 1.67 | Al851076      | XM_110955.2 | Mus musculus expressed sequence Al851076 (Al851076), mRNA.                                                                  |
| scl31978.3.3     | 6-S    | 36.0904 | 1.38 | 5730458D16Rik | NM_177609   | Mus musculus RIKEN cDNA 5730458D16 gene (5730458D16Rik), mRNA.                                                              |
| scl0266692.1     | 279-S  | 36.0866 | 2.24 | Cpne1         | NM_170590.1 | Mus musculus copine 1 (Cpne1), transcript variant 1, mRNA.                                                                  |
| scl0230700.13    | 329-S  | 36.0642 | 1.32 | C330039G02Rik | NM_172699.2 | Mus musculus RIKEN cDNA C330039G02 gene (C330039G02Rik), mRNA.                                                              |

|               |       |         |      |               |             |                                                                                                                    |
|---------------|-------|---------|------|---------------|-------------|--------------------------------------------------------------------------------------------------------------------|
| scl33425.15   | 229-S | 36.0435 | 1.47 | D230025D16Rik | NM_145604.1 |                                                                                                                    |
| scl00038.1    | 12-S  | 36.0383 | 1.5  | Mrpl48        | NM_026971.2 | Mus musculus mitochondrial ribosomal protein L48 (Mrpl48), transcript variant 2, mRNA.                             |
| scl079555.6   | 1-S   | 36.0064 | 1.37 | BC005537      | NM_024473.2 | Mus musculus cDNA sequence BC005537 (BC005537), mRNA.                                                              |
| scl17693.18   | 476-S | 35.966  | 1.38 | Appl6l        | NM_029846.2 | Mus musculus APG16 autophagy 16-like (S. cerevisiae) (Appl6l), transcript variant b, mRNA.                         |
| scl056772.1   | 0-S   | 35.9251 | 1.56 | Al839562      | NM_019914.2 | Mus musculus expressed sequence Al839562 (Al839562), mRNA.                                                         |
| scl30452.18   | 578-S | 35.8937 | 1.36 | Nap14         | NM_008672   | Mus musculus nucleosome assembly protein 1-like 4 (Nap14), mRNA.                                                   |
| scl47166.29.1 | 41-S  | 35.8242 | 1.86 | E430025E21Rik | NM_153548.2 | Mus musculus RIKEN cDNA E430025E21 gene (E430025E21Rik), mRNA.                                                     |
| scl00100169.1 | 330-S | 35.809  | 1.32 | Phactr4       | NM_175306.2 |                                                                                                                    |
| scl26374.22   | 257-S | 35.7211 | 2.48 | Sdad1         | NM_172713.1 | Mus musculus SDA1 domain containing 1 (Sdad1), mRNA.                                                               |
| scl35445.15.1 | 13-S  | 35.6558 | 1.44 | Pccb          | NM_025835.1 | Mus musculus propionyl Coenzyme A carboxylase, beta polypeptide (Pccb), mRNA.                                      |
| scl023986.1   | 240-S | 35.5801 | 2.64 | Peci          | NM_011868.1 | Mus musculus peroxisomal delta3, delta2-enoyl-Coenzyme A isomerase (Peci), mRNA.                                   |
| scl0002028.1  | 25-S  | 35.5799 | 1.3  | 2310066N05Rik | NM_027371.1 | Mus musculus RIKEN cDNA 2310066N05 gene (2310066N05Rik), mRNA.                                                     |
| scl47755.2    | 19-S  | 35.5516 | 1.75 | H1f0          | NM_008197.2 | Mus musculus H1 histone family, member 0 (H1f0), mRNA.                                                             |
| scl32101.7.1  | 5-S   | 35.4798 | 1.74 | D7Wsu128e     | NM_138589   | Mus musculus DNA segment, Chr 7, Wayne State University 128, expressed (D7Wsu128e), mRNA.                          |
| scl46038.17.1 | 26-S  | 35.4707 | 1.4  | Tdrd3         | NM_172605.2 | Mus musculus tudor domain containing 3 (Tdrd3), mRNA.                                                              |
| scl19566.6.1  | 18-S  | 35.4495 | 1.95 | Dpp7          | NM_031843.2 | Mus musculus dipeptidylpeptidase 7 (Dpp7), mRNA.                                                                   |
| scl068581.2   | 286-S | 35.3826 | 1.27 | 1110014C03Rik | NM_026775.2 | Mus musculus RIKEN cDNA 1110014C03 gene (1110014C03Rik), mRNA.                                                     |
| scl31465.20   | 298-S | 35.368  | 7.57 | 9330164H19Rik | NM_178704.2 | Mus musculus RIKEN cDNA 9330164H19 gene (9330164H19Rik), mRNA.                                                     |
| scl51774.11.3 | 64-S  | 35.3363 | 1.3  | Cxxc1         | NM_028868.1 | Mus musculus CXXC finger 1 (PHD domain) (Cxxc1), mRNA.                                                             |
| scl066656.2   | 23-S  | 35.2994 | 1.25 | Eef1d         | NM_023240.1 | Mus musculus eukaryotic translation elongation factor 1 delta (guanine nucleotide exchange protein) (Eef1d), mRNA. |
| scl25446.2    | 385-S | 35.2982 | 1.37 | 2310039E09Rik | NM_026509.1 | Mus musculus RIKEN cDNA 2310039E09 gene (2310039E09Rik), mRNA.                                                     |
| scl23602.11   | 383-S | 35.2585 | 1.39 | 1110005F07Rik | NM_025383   | Mus musculus RIKEN cDNA 1110005F07 gene (1110005F07Rik), mRNA.                                                     |
| scl42993.1.28 | 269-S | 35.139  | 1.57 | 2410016O06Rik | NM_023633   | Mus musculus RIKEN cDNA 2410016O06 gene (2410016O06Rik), mRNA.                                                     |
| scl0001996.1  | 45-S  | 35.1117 | 1.57 | 1110001A05Rik | NM_022554.1 | Mus musculus RIKEN cDNA 1110001A05 gene (1110001A05Rik), mRNA.                                                     |
| scl0066125.2  | 261-S | 34.9938 | 1.31 | Sf3b5         | NM_175102.2 |                                                                                                                    |
| scl0056208.2  | 9-S   | 34.8441 | 1.29 | Becn1         | NM_019584.2 | Mus musculus beclin 1 (coiled-coil, myosin-like BCL2-interacting protein) (Becn1), mRNA.                           |
| scl22729.4.1  | 31-S  | 34.8344 | 1.6  | Amigo         | NM_146137.1 | Mus musculus amphoterin induced gene and ORF (Amigo), mRNA.                                                        |
| scl0320365.12 | 9-S   | 34.8079 | 1.65 | 9330186A19Rik | NM_178781.2 | Mus musculus RIKEN cDNA 9330186A19 gene (9330186A19Rik), mRNA.                                                     |
| scl36580.22.1 | 188-S | 34.7816 | 1.26 | Copb2         | NM_015827.1 | Mus musculus coatomer protein complex, subunit beta 2 (beta prime) (Copb2), mRNA.                                  |
| scl16174.14.1 | 64-S  | 34.7692 | 1.31 | BC003331      | NM_145511.1 | Mus musculus cDNA sequence BC003331 (BC003331), mRNA.                                                              |
| scl52460.11.1 | 30-S  | 34.7081 | 1.61 | Got1          | NM_010324.1 | Mus musculus glutamate oxaloacetate transaminase 1, soluble (Got1), mRNA.                                          |
| scl42244.15   | 187-S | 34.6543 | 1.26 | Aldh6a1       | NM_134042.1 | Mus musculus aldehyde dehydrogenase family 6, subfamily A1 (Aldh6a1), mRNA.                                        |
| scl012491.1   | 51-S  | 34.6496 | 2.42 | Cd36          | NM_007643.2 | Mus musculus CD36 antigen (Cd36), mRNA.                                                                            |
| scl0075089.2  | 74-S  | 34.558  | 1.46 | E030041M21Rik | NM_029166.1 | Mus musculus RIKEN cDNA E030041M21 gene (E030041M21Rik), mRNA.                                                     |
| scl16803.9    | 203-S | 34.4578 | 1.59 | Slc40a1       | NM_016917.1 | Mus musculus solute carrier family 40 (iron-regulated transporter), member 1 (Slc40a1), mRNA.                      |
| scl0016158.2  | 239-S | 34.4276 | 1.54 | Il11ra2       | NM_010550   | Mus musculus interleukin 11 receptor, alpha chain 2 (Il11ra2), mRNA.                                               |
| scl0107094.1  | 210-S | 34.4163 | 1.48 | AA408556      | NM_199447.2 | Mus musculus expressed sequence AA408556 (AA408556), mRNA.                                                         |
| scl23010.9    | 157-S | 34.2961 | 1.46 | 2610029K21Rik | NM_025663.2 | Mus musculus RIKEN cDNA 2610029K21 gene (2610029K21Rik), mRNA.                                                     |
| scl26218.7.1  | 61-S  | 34.2812 | 2.42 | AW049829      | NM_153571.1 | Mus musculus expressed sequence AW049829 (AW049829), mRNA.                                                         |
| scl074522.7   | 319-S | 34.2256 | 1.51 | Zwcc1         | NM_198162.1 | Mus musculus zinc finger, CW-type with coiled-coil domain 1 (Zwcc1), mRNA.                                         |
| scl0004118.1  | 555-S | 34.2006 | 2.82 | Rpo1-3        | NM_181730.2 | Mus musculus RNA polymerase 1-3 (Rpo1-3), mRNA.                                                                    |
| scl20124.13   | 167-S | 34.1902 | 2.19 | Csnk2a1       | NM_007788.2 | Mus musculus casein kinase II, alpha 1 polypeptide (Csnk2a1), mRNA.                                                |
| scl0001148.1  | 50-S  | 34.1398 | 1.42 | Ing4          | NM_133345.1 | Mus musculus inhibitor of growth family, member 4 (Ing4), mRNA.                                                    |
| scl29632.2    | 358-S | 34.1332 | 1.64 | 5830427H10Rik | NM_026365.1 | Mus musculus RIKEN cDNA 5830427H10 gene (5830427H10Rik), mRNA.                                                     |
| scl024004.2   | 257-S | 34.0807 | 1.73 | Rai2          | NM_198409.1 | Mus musculus retinoic acid induced 2 (Rai2), mRNA.                                                                 |
| scl38284.14   | 73-S  | 34.0705 | 1.26 | Cs            | NM_026444.2 | Mus musculus citrate synthase (Cs), mRNA.                                                                          |
| scl21098.22.1 | 27-S  | 34.0548 | 1.99 | Pkn3          | NM_153805.1 | Mus musculus protein kinase N3 (Pkn3), mRNA.                                                                       |
| scl25133.32.1 | 60-S  | 34.0526 | 1.34 | Nrd1          | NM_146150.2 | Mus musculus nardilysin, N-arginine dibasic convertase, NRD convertase 1 (Nrd1), mRNA.                             |
| scl27950.14.1 | 172-S | 34.0195 | 1.35 | Slc4a1ap      | NM_009206.1 | Mus musculus solute carrier family 4 (anion exchanger), member 1, adaptor protein (Slc4a1ap), mRNA.                |
| scl36833.9.1  | 209-S | 33.9736 | 1.76 | Rpl4          | NM_024212.2 | Mus musculus ribosomal protein L4 (Rpl4), mRNA.                                                                    |
| scl29872.10.1 | 133-S | 33.973  | 2.26 | Suclg1        | NM_019879.1 | Mus musculus succinate-CoA ligase, GDP-forming, alpha subunit (Suclg1), mRNA.                                      |
| scl000031.1   | 6-S   | 33.953  | 2.66 | Eif3s1        | NM_144545   | Mus musculus eukaryotic translation initiation factor 3, subunit 1 alpha (Eif3s1), mRNA.                           |
| scl46589.23.1 | 15-S  | 33.878  | 2.11 | 2310021P13Rik | XM_127591.4 |                                                                                                                    |
| scl0067238.2  | 233-S | 33.8678 | 1.45 | 2810453I06Rik | NM_026050.1 | Mus musculus RIKEN cDNA 2810453I06 gene (2810453I06Rik), mRNA.                                                     |
| scl0020747.2  | 286-S | 33.8139 | 1.25 | Spop          | NM_025287.1 | Mus musculus speckle-type POZ protein (Spop), mRNA.                                                                |
| scl38694.11.1 | 0-S   | 33.7703 | 1.32 | Stk11         | NM_011492.1 | Mus musculus serine/threonine kinase 11 (Stk11), mRNA.                                                             |

|                      |         |      |               |             |                                                                                                              |
|----------------------|---------|------|---------------|-------------|--------------------------------------------------------------------------------------------------------------|
| sc1066407.8_34-S     | 33.7496 | 1.45 | Mrps15        |             |                                                                                                              |
| sc130657.16.1_159-S  | 33.7343 | 1.38 | Mvp           | NM_080638.1 | Mus musculus major vault protein (Mvp), mRNA.                                                                |
| sc10100732.7_1-S     | 33.7203 | 2.62 | Mapre3        | NM_133350.1 | Mus musculus microtubule-associated protein, RP/EB family, member 3 (Mapre3), mRNA.                          |
| sc1066114.1_221-S    | 33.708  | 1.55 | Wbscr18       | NM_025362.2 | Mus musculus Williams-Beuren syndrome chromosome region 18 homolog (human) (Wbscr18), mRNA.                  |
| sc1067267.4_0-S      | 33.6756 | 1.29 | 2900010M23Rik | NM_026063.1 | Mus musculus RIKEN cDNA 2900010M23 gene (2900010M23Rik), mRNA.                                               |
| sc131893.12.1_41-S   | 33.6632 | 4.41 | 5730427C23Rik | NM_153777.1 | Mus musculus RIKEN cDNA 5730427C23 gene (5730427C23Rik), mRNA.                                               |
| sc10217069.13_16-S   | 33.6226 | 1.4  | Trim25        | XM_126545.2 | Mus musculus tripartite motif protein 25 (Trim25), mRNA.                                                     |
| sc10216705.9_38-S    | 33.4461 | 1.87 | Al642036      | XM_109767.2 | Mus musculus expressed sequence Al642036 (Al642036), mRNA.                                                   |
| sc10235493.12_117-S  | 33.3558 | 1.75 | BC031353      | NM_153584.1 | Mus musculus cDNA sequence BC031353 (BC031353), mRNA.                                                        |
| sc116472.29.1_1-S    | 33.3428 | 2.03 | 4932408F19Rik | NM_207225.1 | Mus musculus RIKEN cDNA 4932408F19 gene (4932408F19Rik), mRNA.                                               |
| sc10223773.9_321-S   | 33.3342 | 1.64 | Zbed4         | NM_181412.2 |                                                                                                              |
| sc1017936.1_8-S      | 33.2559 | 5.01 | Nab1          | NM_008667.2 | Mus musculus Ngfi-A binding protein 1 (Nab1), mRNA.                                                          |
| sc1011702.3_204-S    | 33.2516 | 1.75 | Amd1          | NM_009665.2 | Mus musculus S-adenosylmethionine decarboxylase 1 (Amd1), mRNA.                                              |
| sc145529.12.1_2-S    | 33.2296 | 2.13 | Rabggtla      | NM_019519.1 | Mus musculus Rab geranylgeranyl transferase, a subunit (Rabggtla), mRNA.                                     |
| sc10056516.1_106-S   | 33.1885 | 1.69 | Rbms2         | NM_019711.1 | Mus musculus RNA binding motif, single stranded interacting protein 2 (Rbms2), mRNA.                         |
| sc10237082.4_163-S   | 33.1498 | 1.4  | Nxt2          | NM_172782.1 |                                                                                                              |
| sc10001502.1_0-S     | 33.0622 | 1.97 | Hspa4         | NM_008300.2 | Mus musculus heat shock protein 4 (Hspa4), mRNA.                                                             |
| sc1014862.2_242-S    | 33.0541 | 1.33 | Gstm1         | NM_010358.2 | Mus musculus glutathione S-transferase, mu 1 (Gstm1), mRNA.                                                  |
| sc1067905.1_18-S     | 32.9998 | 1.37 | 2810423O19Rik | NM_026447   | Mus musculus RIKEN cDNA 2810423O19 gene (2810423O19Rik), transcript variant 1, mRNA.                         |
| sc100192657.1_320-S  | 32.8981 | 3.7  | Eil2          | NM_138953.1 | Mus musculus elongation factor RNA polymerase II 2 (Eil2), mRNA.                                             |
| sc123969.12.1_3-S    | 32.8933 | 1.56 | Cyp4b1        | NM_007823.1 | Mus musculus cytochrome P450, family 4, subfamily b, polypeptide 1 (Cyp4b1), mRNA.                           |
| sc153966.33.1_30-S   | 32.8714 | 2.71 | Phka1         | NM_008832.1 | Mus musculus phosphorylase kinase alpha 1 (Phka1), mRNA.                                                     |
| sc10209497.2_5-S     | 32.8502 | 2.28 | AW547186      | NM_177592.2 | Mus musculus expressed sequence AW547186 (AW547186), mRNA.                                                   |
| sc10002552.1_594-S   | 32.8309 | 1.59 | Triobp        | NM_138579.2 | Mus musculus TRIO and F-actin binding protein (Triobp), mRNA.                                                |
| sc132033.10.26_108-S | 32.822  | 1.44 | BC006909      | NM_145589.2 | Mus musculus cDNA sequence BC006909 (BC006909), mRNA.                                                        |
| sc1068114.7_83-S     | 32.8201 | 1.3  | Mum1          | NM_023431.3 |                                                                                                              |
| sc1066943.7_225-S    | 32.7933 | 1.29 | 2310009N05Rik | NM_025861.1 | Mus musculus RIKEN cDNA 2310009N05 gene (2310009N05Rik), mRNA.                                               |
| sc10050908.1_300-S   | 32.75   | 3.44 | C1s           | NM_144938.1 | Mus musculus complement component 1, s subcomponent (C1s), mRNA.                                             |
| sc122111.1_41-S      | 32.727  | 7.52 | 4631416L12Rik | NM_175365.2 | Mus musculus RIKEN cDNA 4631416L12 gene (4631416L12Rik), mRNA.                                               |
| sc1018023.1_196-S    | 32.7231 | 1.25 | Nfe2l1        | NM_008686.2 | Mus musculus nuclear factor, erythroid derived 2, like 1 (Nfe2l1), mRNA.                                     |
| sc100214290.1_251-S  | 32.6806 | 1.31 | Zcchc6        | NM_153538.1 | Mus musculus zinc finger, CCHC domain containing 6 (Zcchc6), mRNA.                                           |
| sc10069654.1_290-S   | 32.6581 | 1.53 | Dctn2         | NM_027151.1 | Mus musculus dynactin 2 (Dctn2), mRNA.                                                                       |
| sc100231841.2_319-S  | 32.6374 | 1.45 | AA881470      | NM_181066.1 | Mus musculus EST AA881470 (AA881470), mRNA.                                                                  |
| sc1053610.12_290-S   | 32.6096 | 1.64 | Nono          | NM_023144.1 | Mus musculus non-POU-domain-containing, octamer binding protein (Nono), mRNA.                                |
| sc1011787.1_19-S     | 32.5821 | 1.48 | Apbb2         | NM_009686.1 | Mus musculus amyloid beta (A4) precursor protein-binding, family B, member 2 (Apbb2), mRNA.                  |
| sc115987.1.1_285-S   | 32.5739 | 1.33 | Al481316      | XM_148986.1 | Mus musculus expressed sequence Al481316 (Al481316), mRNA.                                                   |
| sc1070221.8_1-S      | 32.5375 | 7.07 | 2600011C06Rik | NM_027349.1 | Mus musculus RIKEN cDNA 2600011C06 gene (2600011C06Rik), mRNA.                                               |
| sc1056708.1_17-S     | 32.5185 | 7.3  | Bsf3          | NM_019952.1 | Mus musculus B-cell stimulating factor 3 (Bsf3), mRNA.                                                       |
| sc126445.6.1_1-S     | 32.4872 | 1.28 | Igfbp7        | NM_008048.1 | Mus musculus insulin-like growth factor binding protein 7 (Igfbp7), mRNA.                                    |
| sc154486.8.1_241-S   | 32.4191 | 1.79 | Asb11         | NM_026853.1 | Mus musculus ankyrin repeat and SOCS box-containing protein 11 (Asb11), mRNA.                                |
| sc10002359.1_0-S     | 32.4082 | 2.18 | Pbef1         | NM_021524.1 | Mus musculus pre-B-cell colony-enhancing factor 1 (Pbef1), mRNA.                                             |
| sc138416.13.1_1-S    | 32.3255 | 1.68 | Ptprb         | NM_029928.1 | Mus musculus protein tyrosine phosphatase, receptor type, B (Ptprb), mRNA.                                   |
| sc10020923.1_202-S   | 32.2869 | 1.29 | Supt4h2       | NM_011509   | Mus musculus suppressor of Ty 4 homolog 2 (S. cerevisiae) (Supt4h2), mRNA.                                   |
| sc10269523.2_3-S     | 32.2778 | 1.24 | Vcp           | NM_009503.2 | Mus musculus valosin containing protein (Vcp), mRNA.                                                         |
| sc10012453.1_227-S   | 32.2266 | 3.11 | Ccni          | NM_017367.2 | Mus musculus cyclin I (Ccni), mRNA.                                                                          |
| sc10054613.2_126-S   | 32.2192 | 1.33 | Siat10        | NM_018784.1 | Mus musculus sialyltransferase 10 (alpha-2,3-sialyltransferase VI) (Siat10), mRNA.                           |
| sc10237422.9_211-S   | 32.218  | 1.28 | BC051080      | NM_183172.1 |                                                                                                              |
| sc134554.11.1_42-S   | 32.1752 | 2.95 | Gcdh          | NM_008097.1 | Mus musculus glutaryl-Coenzyme A dehydrogenase (Gcdh), mRNA.                                                 |
| sc100217430.2_0-S    | 32.1742 | 1.54 | E030024M05Rik | NM_172574.1 | Mus musculus RIKEN cDNA E030024M05 gene (E030024M05Rik), mRNA.                                               |
| sc18197.5_22-S       | 32.1519 | 1.81 | Rgs19         | NM_026446.2 | Mus musculus regulator of G-protein signaling 19 (Rgs19), mRNA.                                              |
| sc10116904.18_144-S  | 32.1502 | 1.31 | AW319487      | NM_054085.1 | Mus musculus expressed sequence AW319487 (AW319487), mRNA.                                                   |
| sc1026895.7_143-S    | 32.1439 | 2.74 | Cops7b        | NM_172974.1 | Mus musculus COP9 (constitutive photomorphogenic) homolog, subunit 7b (Arabidopsis thaliana) (Cops7b), mRNA. |
| sc10029809.2_171-S   | 32.0603 | 1.7  | Rabgap11      | NM_013862.3 |                                                                                                              |
| sc1012457.3_248-S    | 32.0107 | 2    | Ccrn4l        | NM_009834.1 | Mus musculus CCR4 carbon catabolite repression 4-like (S. cerevisiae) (Ccrn4l), mRNA.                        |
| sc10015183.2_163-S   | 32.0058 | 1.28 | Hdac3         | NM_010411.1 | Mus musculus histone deacetylase 3 (Hdac3), mRNA.                                                            |
| sc116121.8.1_163-S   | 31.9836 | 1.36 | BC034090      | XM_148974.3 | Mus musculus cDNA sequence BC034090 (BC034090), mRNA.                                                        |

|                      |         |      |               |             |                                                                                                                                               |
|----------------------|---------|------|---------------|-------------|-----------------------------------------------------------------------------------------------------------------------------------------------|
| scl0387340.1 274-S   | 31.9712 | 6.97 | Tas2r104      | NM_207011.1 | Mus musculus taste receptor, type 2, member 104 (Tas2r104), mRNA.                                                                             |
| scl37604.17 345-S    | 31.9704 | 1.53 | Nedd1         | NM_008682   | Mus musculus neural precursor cell expressed, developmentally down-regulated gene 1 (Nedd1), mRNA.                                            |
| scl51006.12.1 70-S   | 31.9545 | 1.28 | Rpl3l         | NM_025425.1 | Mus musculus ribosomal protein L3-like (Rpl3l), mRNA.                                                                                         |
| scl0001099.1 185-S   | 31.9202 | 2.37 | Sl7           | NM_022332.1 | Mus musculus suppression of tumorigenicity 7 (Sl7), mRNA.                                                                                     |
| scl40718.3 48-S      | 31.9194 | 2.7  | 2210020M01Rik | NM_183259.1 | Mus musculus RIKEN cDNA 2210020M01 gene (2210020M01Rik), mRNA.                                                                                |
| scl0017755.1 176-S   | 31.9083 | 7.07 | Mtap1b        | NM_008634.1 | Mus musculus microtubule-associated protein 1 B (Mtap1b), mRNA.                                                                               |
| scl0023821.2 49-S    | 31.892  | 1.31 | Bace1         | NM_011792.3 | Mus musculus beta-site APP cleaving enzyme 1 (Bace1), mRNA.                                                                                   |
| scl068730.1 55-S     | 31.8834 | 1.39 | 1110032N12Rik | NM_026824.2 | Mus musculus RIKEN cDNA 1110032N12 gene (1110032N12Rik), mRNA.                                                                                |
| scl33707.42 67-S     | 31.8828 | 1.52 | Myo9b         | NM_015742.1 | Mus musculus myosin IXb (Myo9b), mRNA.                                                                                                        |
| scl0029869.2 146-S   | 31.8742 | 1.41 | Ulk2          | NM_013881.3 | Mus musculus Unc-51 like kinase 2 (C. elegans) (Ulk2), mRNA.                                                                                  |
| scl18742.7 10-S      | 31.8533 | 1.39 | Slc30a4       | NM_011774   | Mus musculus solute carrier family 30 (zinc transporter), member 4 (Slc30a4), mRNA.                                                           |
| scl33602.12.1 74-S   | 31.8518 | 2.21 | Ddx39         | NM_197982.2 | Mus musculus DEAD (Asp-Glu-Ala-Asp) box polypeptide 39 (Ddx39), mRNA.                                                                         |
| scl068735.6 63-S     | 31.8078 | 1.25 | Mrps18c       | XM_194230.3 |                                                                                                                                               |
| scl011430.3 98-S     | 31.8011 | 2.48 | Acox1         | NM_015729   | Mus musculus acyl-Coenzyme A oxidase 1, palmitoyl (Acox1), mRNA.                                                                              |
| scl070478.15 14-S    | 31.772  | 1.39 | Mipep         | NM_027436.1 | Mus musculus mitochondrial intermediate peptidase (Mipep), mRNA.                                                                              |
| scl33398.3 321-S     | 31.7719 | 1.54 | AW539964      | NM_173432.2 | Mus musculus expressed sequence AW539964 (AW539964), mRNA.                                                                                    |
| scl38585.9.1 9-S     | 31.756  | 1.94 | 2900091E11Rik | NM_026070.1 | Mus musculus RIKEN cDNA 2900091E11 gene (2900091E11Rik), mRNA.                                                                                |
| scl019946.1 13-S     | 31.7534 | 1.53 | Rpl30         | NM_009083.2 | Mus musculus ribosomal protein L30 (Rpl30), mRNA.                                                                                             |
| scl0001538.1 0-S     | 31.7486 | 5.34 | Cacnb1        | NM_031173.1 | Mus musculus calcium channel, voltage-dependent, beta 1 subunit (Cacnb1), mRNA.                                                               |
| scl0020947.1 79-S    | 31.7111 | 1.43 | Swap70        | NM_009302.2 | Mus musculus SWAP complex protein (Swap70), mRNA.                                                                                             |
| scl42839.5.1 76-S    | 31.7008 | 7.11 | Serpina5      | NM_172953.1 | Mus musculus serine (or cysteine) proteinase inhibitor, clade A, member 5 (Serpina5), mRNA.                                                   |
| scl38270.7 86-S      | 31.6468 | 3.79 | Dnajc14       | NM_028873.2 |                                                                                                                                               |
| scl018458.3 17-S     | 31.6402 | 1.4  | Pabpc1        | NM_008774.2 | Mus musculus poly A binding protein, cytoplasmic 1 (Pabpc1), mRNA.                                                                            |
| scl21064.31 2-S      | 31.614  | 1.3  | 5830434P21Rik | NM_172661.2 | Mus musculus RIKEN cDNA 5830434P21 gene (5830434P21Rik), mRNA.                                                                                |
| scl072795.9 17-S     | 31.5939 | 1.26 | Ttc19         | NM_028360.1 |                                                                                                                                               |
| scl31512.7.1 16-S    | 31.5471 | 1.49 | 5033425B17Rik | NM_027215   | Mus musculus RIKEN cDNA 5033425B17 gene (5033425B17Rik), mRNA.                                                                                |
| scl0227570.7 253-S   | 31.4709 | 1.49 | 2810455F06Rik | XM_130011.5 | Mus musculus RIKEN cDNA 2810455F06 gene (2810455F06Rik), mRNA.                                                                                |
| scl49475.21 477-S    | 31.4624 | 1.35 | Mgrr1         | NM_029657.2 | Mus musculus mahogunin, ring finger 1 (Mgrr1), mRNA.                                                                                          |
| scl35001.15 103-S    | 31.4505 | 1.28 | Plekha2       | NM_031257.2 | Mus musculus pleckstrin homology domain-containing, family A (phosphoinositide binding specific) member 2 (Plekha2), mRNA.                    |
| scl26595.14.1 90-S   | 31.4295 | 2.04 | Ppargc1a      | NM_008904.1 | Mus musculus peroxisome proliferative activated receptor, gamma, coactivator 1 alpha (Ppargc1a), mRNA.                                        |
| scl017449.1 1-S      | 31.3768 | 2.42 | Mdh1          | NM_008618.2 | Mus musculus malate dehydrogenase 1, NAD (soluble) (Mdh1), mRNA.                                                                              |
| scl0215193.1 66-S    | 31.3554 | 2.51 | AA408296      | NM_145415.1 | Mus musculus expressed sequence AA408296 (AA408296), mRNA.                                                                                    |
| scl27876.6.1 53-S    | 31.2349 | 1.39 | 2810021O14Rik | NM_025480.2 | Mus musculus RIKEN cDNA 2810021O14 gene (2810021O14Rik), mRNA.                                                                                |
| scl0216622.2 35-S    | 31.2114 | 1.7  | 4931440F15Rik | NM_176829.1 | Mus musculus RIKEN cDNA 4931440F15 gene (4931440F15Rik), mRNA.                                                                                |
| scl37393.11 210-S    | 31.1946 | 1.32 | Pip5k2c       | NM_054097.2 | Mus musculus phosphatidylinositol-4-phosphate 5-kinase, type II, gamma (Pip5k2c), mRNA.                                                       |
| scl0080708.1 141-S   | 31.1924 | 1.25 | Pacsin3       | NM_028733.1 | Mus musculus protein kinase C and casein kinase substrate in neurons 3 (Pacsin3), mRNA.                                                       |
| scl42729.13.1 74-S   | 31.1536 | 1.35 | Adssl1        | NM_007421.1 |                                                                                                                                               |
| scl0211446.1 21-S    | 31.1218 | 1.37 | Sec6l1        | NM_177333   | Mus musculus SEC6-like 1 (S. cerevisiae) (Sec6l1), mRNA.                                                                                      |
| scl00235534.1 198-S  | 31.0959 | 1.47 | C130099A20Rik | NM_153420.1 |                                                                                                                                               |
| scl50778.12.1 32-S   | 31.0688 | 1.26 | Bat1a         | NM_019693.2 | Mus musculus HLA-B-associated transcript 1A (Bat1a), mRNA.                                                                                    |
| scl51773.17.1 8-S    | 31.0517 | 2.95 | Mbd1          | NM_013594.1 | Mus musculus methyl-CpG binding domain protein 1 (Mbd1), mRNA.                                                                                |
| scl21832.19 384 11-S | 30.9645 | 1.41 | Tsrc1         | NM_144899.2 | Mus musculus thrombospondin repeat containing 1 (Tsrc1), mRNA.                                                                                |
| scl026901.3 41-S     | 30.9497 | 1.35 | Deb1          | NM_026794.2 | Mus musculus differentially expressed in B16F10 1 (Deb1), mRNA.                                                                               |
| scl0058909.2 289-S   | 30.9482 | 1.69 | D430015B01Rik | NM_153574.1 | Mus musculus RIKEN cDNA D430015B01 gene (D430015B01Rik), mRNA.                                                                                |
| scl00229949.2 260-S  | 30.9117 | 7.01 | Ak5           | NM_153066.1 | Mus musculus adenylate kinase 5 (Ak5), mRNA.                                                                                                  |
| scl066369.15 25-S    | 30.9043 | 2.85 | 2310016K04Rik | XM_134309.1 | Mus musculus RIKEN cDNA 2310016K04 gene (2310016K04Rik), mRNA.                                                                                |
| scl0102143.1 151-S   | 30.8846 | 1.3  | D130072O21Rik | NM_175322.2 | Mus musculus RIKEN cDNA D130072O21 gene (D130072O21Rik), mRNA.                                                                                |
| scl44745.15.1 5-S    | 30.8685 | 6.9  | Unc5a         | NM_153131.1 | Mus musculus unc-5 homolog A (C. elegans) (Unc5a), mRNA.                                                                                      |
| scl0001814.1 15-S    | 30.8669 | 1.28 | Magmas        | NM_025571.1 | Mus musculus mitochondria-associated protein involved in granulocyte-macrophage colony-stimulating factor signal transduction (Magmas), mRNA. |
| scl33380.18.1 13-S   | 30.8558 | 1.55 | Tex292        | NM_011574.1 | Mus musculus testis expressed gene 292 (Tex292), mRNA.                                                                                        |
| scl49774.8.1 3-S     | 30.8155 | 1.62 | 2310076L09Rik | NM_025874.2 | Mus musculus RIKEN cDNA 2310076L09 gene (2310076L09Rik), mRNA.                                                                                |
| scl0067184.2 306-S   | 30.771  | 1.41 | Grim19        | NM_023312.1 | Mus musculus genes associated with retinoid-IFN-induced mortality 19 (Grim19), mRNA.                                                          |
| scl44342.6.5 4-S     | 30.7706 | 1.37 | Mocs2         | NM_013826.1 | Mus musculus molybdenum cofactor synthesis 2 (Mocs2), mRNA.                                                                                   |
| scl28496.23.1 78-S   | 30.7556 | 1.82 | Bms1l         | NM_194339.1 | Mus musculus BMS1-like, ribosome assembly protein (yeast) (Bms1l), mRNA.                                                                      |
| scl012608.3 48-S     | 30.7532 | 2.82 | Cebpb         | NM_009883.1 | Mus musculus CCAAT/enhancer binding protein (C/EBP), beta (Cebpb), mRNA.                                                                      |
| scl25760.31.1 106-S  | 30.707  | 1.46 | Flt1          | NM_010228.2 | Mus musculus FMS-like tyrosine kinase 1 (Flt1), mRNA.                                                                                         |



|                     |         |      |               |             |                                                                                                                           |
|---------------------|---------|------|---------------|-------------|---------------------------------------------------------------------------------------------------------------------------|
| scI0240263.2 0-S    | 30.6953 | 2    | Fem1c         | NM_173423.1 | Mus musculus fem-1 homolog c (C.elegans) (Fem1c), mRNA.                                                                   |
| scI0072472.2 14-S   | 30.667  | 1.83 | Sic16a10      | NM_028247.1 | Mus musculus solute carrier family 16 (monocarboxylic acid transporters), member 10 (Sic16a10), mRNA.                     |
| scI32661.6 250-S    | 30.6491 | 2.71 | Kdelr1        | NM_133950   | Mus musculus KDEL (Lys-Asp-Glu-Leu) endoplasmic reticulum protein retention receptor 1 (Kdelr1), mRNA.                    |
| scI0215015.1 6-S    | 30.6426 | 1.54 | C530043G21Rik | NM_145413.2 | Mus musculus RIKEN cDNA C530043G21 gene (C530043G21Rik), mRNA.                                                            |
| scI34621.8 577-S    | 30.632  | 1.34 | Ednra         | NM_010332.1 | Mus musculus endothelin receptor type A (Ednra), mRNA.                                                                    |
| scI45372.3 35-S     | 30.5826 | 2.73 | Mscp          | NM_030054.2 | Mus musculus mitochondrial solute carrier protein (Mscp), mRNA.                                                           |
| scI0003299.1 11-S   | 30.5806 | 1.98 | 2810410A08Rik | XM_130324.4 | Mus musculus RIKEN cDNA 2810410A08 gene (2810410A08Rik), mRNA.                                                            |
| scI056258.4 7-S     | 30.5796 | 2.86 | Hnrph2        | NM_019868.2 | Mus musculus heterogeneous nuclear ribonucleoprotein H2 (Hnrph2), mRNA.                                                   |
| scI0108888.1 320-S  | 30.5743 | 1.42 | Atad3a        | NM_179203.1 | Mus musculus ATPase family, AAA domain containing 3A (Atad3a), mRNA.                                                      |
| scI41644.4 98-S     | 30.5648 | 1.36 | Crsp9         | NM_025426.2 | Mus musculus cofactor required for Sp1 transcriptional activation, subunit 9 (Crsp9), mRNA.                               |
| scI36808.5 96-S     | 30.5646 | 1.54 | Pdcd7         | NM_016688.1 | Mus musculus programmed cell death protein 7 (Pdcd7), mRNA.                                                               |
| scI26220.57 399-S   | 30.5478 | 1.57 | Ep400         | NM_029337.1 | Mus musculus E1A binding protein p400 (Ep400), mRNA.                                                                      |
| scI40878.26 32-S    | 30.5467 | 1.42 | Nbr1          | NM_008676.1 | Mus musculus neighbor of Brca1 gene 1 (Nbr1), mRNA.                                                                       |
| scI00140740.1 195-S | 30.5451 | 1.39 | Sec63         | NM_153055.2 | Mus musculus SEC63-like (S. cerevisiae) (Sec63), mRNA.                                                                    |
| scI00192197.1 323-S | 30.5223 | 1.62 | Bcas3         | NM_138681.2 | Mus musculus breast carcinoma amplified sequence 3 (Bcas3), mRNA.                                                         |
| scI093684.5 156-S   | 30.4843 | 1.74 | 39340         | NM_053102.1 | Mus musculus selenoprotein (Sep15), mRNA.                                                                                 |
| scI0001327.1 163-S  | 30.4824 | 2.12 | Trim41        | NM_145377   | Mus musculus tripartite motif-containing 41 (Trim41), mRNA.                                                               |
| scI068058.2 29-S    | 30.4735 | 1.54 | Chd11         | NM_026539.1 | Mus musculus chromodomain helicase DNA binding protein 1-like (Chd11), mRNA.                                              |
| scI41617.26 170-S   | 30.4166 | 2.15 | 2700008N14Rik | XM_109880.4 | Mus musculus RIKEN cDNA 2700008N14 gene (2700008N14Rik), mRNA.                                                            |
| scI0067464.2 263-S  | 30.4154 | 1.36 | Entpd4        | NM_026174.1 |                                                                                                                           |
| scI54760.5 0-S      | 30.4085 | 2.28 | Efnb1         | NM_010110.2 | Mus musculus ephrin B1 (Efnb1), mRNA.                                                                                     |
| scI45065.22.7 66-S  | 30.4059 | 1.46 | B130016L12Rik | NM_144835.3 |                                                                                                                           |
| scI0076367.2 3-S    | 30.3998 | 5.55 | Trp53rk       | NM_023815.2 |                                                                                                                           |
| scI20678.2.192 93-S | 30.3694 | 6.37 | Olf996        | NM_146437.1 | Mus musculus olfactory receptor 996 (Olf996), mRNA.                                                                       |
| scI37933.6 401-S    | 30.3606 | 1.5  | D10Ert641e    | NM_025514.1 | Mus musculus DNA segment, Chr 10, ERATO Doi 641, expressed (D10Ert641e), mRNA.                                            |
| scI019130.1 4-S     | 30.3428 | 1.57 | Prox1         | NM_008937.2 | Mus musculus prospero-related homeobox 1 (Prox1), mRNA.                                                                   |
| scI0083964.2 193-S  | 30.3358 | 1.47 | Jam3          | NM_023277.1 | Mus musculus junction adhesion molecule 3 (Jam3), mRNA.                                                                   |
| scI018744.1 4-S     | 30.2537 | 1.3  | Pja1          | NM_008853.1 | Mus musculus praja1, RING-H2 motif containing (Pja1), mRNA.                                                               |
| scI40219.8.1 51-S   | 30.2506 | 1.34 | Pdlim4        | NM_019417.1 | Mus musculus PDZ and LIM domain 4 (Pdlim4), mRNA.                                                                         |
| scI36930.15.1 0-S   | 30.2387 | 1.49 | 3010021M21Rik | NM_180600.1 | Mus musculus RIKEN cDNA 3010021M21 gene (3010021M21Rik), mRNA.                                                            |
| scI011363.1 35-S    | 30.2021 | 2.49 | Acadl         | NM_007381.2 | Mus musculus acetyl-Coenzyme A dehydrogenase, long-chain (Acadl), mRNA.                                                   |
| scI31989.25.1 124-S | 30.2014 | 1.84 | Tacc2         | NM_206856.1 | Mus musculus transforming, acidic coiled-coil containing protein 2 (Tacc2), transcript variant 1, mRNA.                   |
| scI026446.4 108-S   | 30.1713 | 1.23 | Psmb3         | NM_011971.2 | Mus musculus proteasome (prosome, macropain) subunit, beta type 3 (Psmb3), mRNA.                                          |
| scI33146.4.49 0-S   | 30.1115 | 1.35 | Ndufa3        | NM_025348   | Mus musculus NADH dehydrogenase (ubiquinone) 1 alpha subcomplex, 3 (Ndufa3), mRNA.                                        |
| scI18978.15.15 4-S  | 30.0755 | 3.09 | Ext2          | NM_010163   | Mus musculus exostosins (multiple) 2 (Ext2), mRNA.                                                                        |
| scI0001672.1 92-S   | 30.0654 | 3.91 | Phf1          | NM_009343.1 | Mus musculus PHD finger protein 1 (Phf1), mRNA.                                                                           |
| scI00107371.2 186-S | 29.9771 | 1.39 | Sec15l1       | NM_175353.1 |                                                                                                                           |
| scI18763.35.1 291-S | 29.97   | 1.61 | B430315C20Rik | NM_178795.3 | Mus musculus RIKEN cDNA B430315C20 gene (B430315C20Rik), mRNA.                                                            |
| scI073998.24 21-S   | 29.9692 | 1.33 | Herc3         | NM_028705.2 | Mus musculus hect domain and RLD 3 (Herc3), mRNA.                                                                         |
| scI49330.22.4 270-S | 29.9427 | 3.02 | Chrd          | NM_009893.1 | Mus musculus chordin (Chrd), mRNA.                                                                                        |
| scI33725.12 115-S   | 29.9388 | 1.39 | Fkbp8         | NM_010223.1 | Mus musculus FK506 binding protein 8 (Fkbp8), mRNA.                                                                       |
| scI0003137.1 53-S   | 29.9128 | 1.32 | Drbp1         | NM_178090.2 | Mus musculus developmentally regulated RNA binding protein 1 (Drbp1), mRNA.                                               |
| scI34841.3 211-S    | 29.8673 | 2.57 | 492151116Rik  | NM_172407.1 | Mus musculus RIKEN cDNA 492151116 gene (492151116Rik), mRNA.                                                              |
| scI30532.13.1 156-S | 29.7172 | 4.25 | Sik32c        | NM_021302.1 |                                                                                                                           |
| scI0002044.1 26-S   | 29.713  | 1.89 | Alg5          | NM_025442.1 | Mus musculus asparagine-linked glycosylation 5 homolog (yeast, dolichyl-phosphate beta-glucosyltransferase) (Alg5), mRNA. |
| scI23666.9 53-S     | 29.6899 | 1.25 | Lypla2        | NM_011942.1 | Mus musculus lysophospholipase 2 (Lypla2), mRNA.                                                                          |
| scI37440.14 650-S   | 29.628  | 1.77 | Irak3         | NM_028679.2 | Mus musculus interleukin-1 receptor-associated kinase 3 (Irak3), mRNA.                                                    |
| scI00104318.1 298-S | 29.5963 | 1.56 | Csnk1d        | NM_027874.1 | Mus musculus casein kinase 1, delta (Csnk1d), transcript variant 2, mRNA.                                                 |
| scI38337.8 34-S     | 29.5845 | 4.06 | Ctdsp2        | NM_146012.1 | Mus musculus CTD (carboxy-terminal domain, RNA polymerase II, polypeptide A) small phosphatase 2 (Ctdsp2), mRNA.          |
| scI40305.32 46-S    | 29.5625 | 1.82 | Cyfp2         | XM_147526.1 | Mus musculus cytoplasmic FMR1 interacting protein 2 (Cyfp2), mRNA.                                                        |
| scI0013669.1 3-S    | 29.555  | 1.42 | Eif3s10       | NM_010123.2 | Mus musculus eukaryotic translation initiation factor 3, subunit 10 (theta) (Eif3s10), mRNA.                              |
| scI00224727.2 315-S | 29.5399 | 1.33 | Bat3          | NM_057171.1 | Mus musculus HLA-B-associated transcript 3 (Bat3), mRNA.                                                                  |
| scI078090.2 4-S     | 29.4702 | 4.04 | Golgb1        | XM_148244.4 |                                                                                                                           |
| scI057435.1 222-S   | 29.4516 | 1.9  | S3-12         | NM_020568.1 | Mus musculus plasma membrane associated protein, S3-12 (S3-12), mRNA.                                                     |
| scI47016.7 165-S    | 29.4188 | 6.13 | 9130022K13Rik | XM_203652.2 | Mus musculus RIKEN cDNA 9130022K13 gene (9130022K13Rik), mRNA.                                                            |
| scI011532.9 123-S   | 29.403  | 1.57 | Adh5          | NM_007410.2 | Mus musculus alcohol dehydrogenase 5 (class III), chi polypeptide (Adh5), mRNA.                                           |

|                      |         |      |               |             |                                                                                                    |
|----------------------|---------|------|---------------|-------------|----------------------------------------------------------------------------------------------------|
| sci28314.7.1 50-S    | 29.395  | 1.4  | 2010012C16Rik | NM_025564.1 | Mus musculus RIKEN cDNA 2010012C16 gene (2010012C16Rik), mRNA.                                     |
| sci41618.6.1 22-S    | 29.3891 | 1.3  | Rnf130        | NM_021540.2 | Mus musculus ring finger protein 130 (Rnf130), mRNA.                                               |
| sci080751.6 5-S      | 29.3852 | 1.26 | Rnf34         | NM_030564.1 | Mus musculus ring finger protein 34 (Rnf34), mRNA.                                                 |
| sci00234733.1 149-S  | 29.3758 | 4.06 | 2810457M08Rik | NM_172284.1 | Mus musculus RIKEN cDNA 2810457M08 gene (2810457M08Rik), mRNA.                                     |
| GI_31982339-S        | 29.3532 | 5.21 | Gip           | NM_008119.2 | Mus musculus gastric inhibitory polypeptide (Gip), mRNA.                                           |
| sci018550.2 67-S     | 29.3481 | 3.93 | Furin         | NM_011046.1 | Mus musculus furin (paired basic amino acid cleaving enzyme) (Furin), mRNA.                        |
| sci25081.14.1 17-S   | 29.3474 | 1.53 | D630045E04Rik | NM_153521.1 | Mus musculus RIKEN cDNA D630045E04 gene (D630045E04Rik), mRNA.                                     |
| sci20653.2 227-S     | 29.3098 | 1.8  | C1qtnf4       | NM_026161.1 | Mus musculus C1q and tumor necrosis factor related protein 4 (C1qtnf4), mRNA.                      |
| sci20297.9 280-S     | 29.2823 | 1.28 | Ptpns1        | XM_149178.1 | Mus musculus protein tyrosine phosphatase, non-receptor type substrate 1 (Ptpns1), mRNA.           |
| sci067455.1 261-S    | 29.2756 | 1.55 | Kih13         | NM_026167.1 | Mus musculus kelch-like 13 (Drosophila) (Kih13), mRNA.                                             |
| sci24307.19 191-S    | 29.2687 | 1.66 | Catnal1       | NM_018761.2 | Mus musculus catenin alpha-like 1 (Catnal1), mRNA.                                                 |
| sci0002099.1 352-S   | 29.2647 | 1.6  | Pias3         | NM_146135.1 | Mus musculus protein inhibitor of activated STAT 3 (Pias3), transcript variant 1, mRNA.            |
| sci0020479.2 290-S   | 29.2579 | 1.64 | Vps4b         | NM_009190.1 | Mus musculus vacuolar protein sorting 4b (yeast) (Vps4b), mRNA.                                    |
| sci078653.2 11-S     | 29.2418 | 1.23 | 1810056O20Rik | NM_175277.2 | Mus musculus RIKEN cDNA 1810056O20 gene (1810056O20Rik), mRNA.                                     |
| sci41358.1 245-S     | 29.2103 | 1.37 | 1810027O10Rik | XM_109683.4 | Mus musculus RIKEN cDNA 1810027O10 gene (1810027O10Rik), mRNA.                                     |
| sci47390.18.104 38-S | 29.2068 | 1.82 | Tars          | NM_033074.2 | Mus musculus threonyl-tRNA synthetase (Tars), mRNA.                                                |
| sci22117.3 138-S     | 29.1556 | 5.5  | Igsf10        | XM_143254.3 |                                                                                                    |
| sci0068310.2 45-S    | 29.1246 | 2.5  | Zmym1         | NM_026670.2 | Mus musculus zinc finger, MYM domain containing 1 (Zmym1), mRNA.                                   |
| sci22773.20.1 35-S   | 29.109  | 2.27 | Phtf1         | XM_356222.1 | Mus musculus putative homeodomain transcription factor 1 (Phtf1), mRNA.                            |
| sci47045.25.1 21-S   | 29.0404 | 1.64 | Oplah         | NM_153122.1 | Mus musculus 5-oxoprolinase (ATP-hydrolysing) (Oplah), mRNA.                                       |
| sci31414.28.1 4-S    | 29.0287 | 1.82 | Mybpc2        | NM_146189.1 | Mus musculus myosin binding protein C, fast-type (Mybpc2), mRNA.                                   |
| sci0020491.2 142-S   | 29.0242 | 4.71 | Sla           | NM_009192.1 | Mus musculus src-like adaptor (Sla), mRNA.                                                         |
| sci22977.3.91 193-S  | 29.0092 | 1.38 | Dpm3          | XM_130951.1 | Mus musculus dolichyl-phosphate mannosyltransferase polypeptide 3 (Dpm3), mRNA.                    |
| sci31487.7.1 48-S    | 28.9859 | 1.3  | 6030457N17Rik | XM_133378.3 | Mus musculus RIKEN cDNA 6030457N17 gene (6030457N17Rik), mRNA.                                     |
| sci0001346.1 38-S    | 28.9703 | 8.05 | Sphk1         | NM_011451.1 | Mus musculus sphingosine kinase 1 (Sphk1), mRNA.                                                   |
| sci00215751.1 299-S  | 28.9131 | 1.25 | BC013529      | NM_145418.1 | Mus musculus cDNA sequence BC013529 (BC013529), mRNA.                                              |
| sci54755.10 245-S    | 28.8883 | 4.01 | Eda           | NM_010099.1 | Mus musculus ectodysplasin-A (Eda), mRNA.                                                          |
| sci026912.9 26-S     | 28.879  | 1.59 | Gcat          | NM_013847   | Mus musculus glycine C-acetyltransferase (2-amino-3-ketobutyrate-coenzyme A ligase) (Gcat), mRNA.  |
| sci0002340.1 98-S    | 28.8461 | 1.82 | Nin           | NM_008697   | Mus musculus ninein (Nin), mRNA.                                                                   |
| sci35165.21 648-S    | 28.8405 | 1.23 | Fyco1         | NM_148925.1 | Mus musculus FYVE and coiled-coil domain containing 1 (Fyco1), mRNA.                               |
| sci25868.6.1 19-S    | 28.8333 | 1.63 | D5Wsu46e      | NM_144913.2 | Mus musculus DNA segment, Chr 5, Wayne State University 46, expressed (D5Wsu46e), mRNA.            |
| sci0003483.1 26-S    | 28.7804 | 7.17 | 2210413P10Rik | NM_020518.1 | Mus musculus RIKEN cDNA 2210413P10 gene (2210413P10Rik), mRNA.                                     |
| sci0216792.1 314-S   | 28.7794 | 1.91 | A230051G13Rik | NM_173785.2 |                                                                                                    |
| sci34640.17 455-S    | 28.7763 | 1.26 | Large         | NM_010687.1 | Mus musculus like-glycosyltransferase (Large), mRNA.                                               |
| sci0234385.1 330-S   | 28.7734 | 1.88 | Mast3         | NM_199308.1 |                                                                                                    |
| sci41592.12.1 36-S   | 28.7445 | 1.4  | 2900006B13Rik | NM_028398.1 | Mus musculus RIKEN cDNA 2900006B13 gene (2900006B13Rik), mRNA.                                     |
| sci55017.16.1 2-S    | 28.7013 | 1.7  | Araf1         | NM_009703.1 |                                                                                                    |
| sci42976.13.1 6-S    | 28.6977 | 1.37 | Coq6          | NM_172582.1 | Mus musculus coenzyme Q6 homolog (yeast) (Coq6), mRNA.                                             |
| sci31001.17.1 88-S   | 28.6188 | 1.47 | Slco2b1       | NM_175316.2 | Mus musculus solute carrier organic anion transporter family, member 2b1 (Slco2b1), mRNA.          |
| sci39534.12.3 104-S  | 28.6154 | 1.38 | 2310044P18Rik | NM_144829.1 | Mus musculus RIKEN cDNA 2310044P18 gene (2310044P18Rik), mRNA.                                     |
| sci38024.23.1 253-S  | 28.5615 | 1.42 | A530089117Rik | NM_133999.1 | Mus musculus RIKEN cDNA A530089117 gene (A530089117Rik), mRNA.                                     |
| sci0056550.1 264-S   | 28.5545 | 1.33 | Ube2d2        | NM_019912.1 | Mus musculus ubiquitin-conjugating enzyme E2D 2 (Ube2d2), mRNA.                                    |
| sci0011518.2 215-S   | 28.5215 | 1.85 | Add1          | NM_013457.1 | Mus musculus adducin 1 (alpha) (Add1), mRNA.                                                       |
| sci38291.1 10-S      | 28.5179 | 4.34 | D10Ucl2       | NM_133996.2 | Mus musculus DNA segment, Chr 10, University of California at Los Angeles 2 (D10Ucl2), mRNA.       |
| sci23470.4 177-S     | 28.4789 | 2.85 | Phf13         | NM_172705.1 | Mus musculus PHD finger protein 13 (Phf13), mRNA.                                                  |
| sci44054.10 313-S    | 28.4591 | 1.4  | Nedd9         | NM_017464.2 | Mus musculus neural precursor cell expressed, developmentally down-regulated gene 9 (Nedd9), mRNA. |
| sci40538.6.1 45-S    | 28.4519 | 1.27 | H2afv         | XM_126043.3 |                                                                                                    |
| sci0116701.6 71-S    | 28.4152 | 1.86 | Fgfr1         | NM_054071.1 | Mus musculus fibroblast growth factor receptor-like 1 (Fgfr1), mRNA.                               |
| sci28444.18.1 1-S    | 28.4151 | 1.33 | Phc1          | NM_007905.1 | Mus musculus polyhomeotic-like 1 (Drosophila) (Phc1), mRNA.                                        |
| sci24373.4.1 116-S   | 28.3919 | 6.01 | Exosc3        | NM_025513.1 | Mus musculus exosome component 3 (Exosc3), mRNA.                                                   |
| sci54116.7.1 56-S    | 28.3784 | 1.63 | Mtcp1         | NM_010839.2 | Mus musculus mature T-cell proliferation 1 (Mtcp1), mRNA.                                          |
| sci25927.13 1-S      | 28.3726 | 1.47 | Pom121        | NM_148932.1 | Mus musculus nuclear pore membrane protein 121 (Pom121), mRNA.                                     |
| sci45364.8.1 112-S   | 28.3706 | 1.44 | 1700020M16Rik | XM_127811.4 | Mus musculus RIKEN cDNA 1700020M16 gene (1700020M16Rik), mRNA.                                     |
| sci074319.4 0-S      | 28.3356 | 1.61 | 1110005A03Rik | NM_028865   | Mus musculus RIKEN cDNA 1110005A03 gene (1110005A03Rik), mRNA.                                     |
| sci00102103.1 84-S   | 28.2976 | 1.45 | Mtus1         | NM_178902.3 | Mus musculus mitochondrial tumor suppressor 1 (Mtus1), mRNA.                                       |
| sci41378.4.1 23-S    | 28.2262 | 7.08 | Hes7          | NM_033041   | Mus musculus hairy and enhancer of split 7 (Drosophila) (Hes7), mRNA.                              |

|                |        |         |      |               |             |                                                                                                                       |
|----------------|--------|---------|------|---------------|-------------|-----------------------------------------------------------------------------------------------------------------------|
| scl014007.1    | 13-S   | 28.2006 | 1.25 | Cugbp2        | NM_010160.1 | Mus musculus CUG triplet repeat, RNA binding protein 2 (Cugbp2), mRNA.                                                |
| scl0268859.12  | 21-S   | 28.1968 | 1.26 | A2bp1         | NM_021477   | Mus musculus ataxin 2 binding protein 1 (A2bp1), transcript variant 2, mRNA.                                          |
| scl38714.10.10 | 60-S   | 28.1705 | 1.58 | Hcn2          | NM_008226.1 | Mus musculus hyperpolarization-activated, cyclic nucleotide-gated K+ 2 (Hcn2), mRNA.                                  |
| scl056384.3    | 31-S   | 28.1607 | 1.68 | Letm1         | NM_019694.1 | Mus musculus leucine zipper-EF-hand containing transmembrane protein 1 (Letm1), mRNA.                                 |
| scl0026430.2   | 0-S    | 28.1418 | 1.56 | Parg          | NM_011960.1 | Mus musculus poly (ADP-ribose) glycohydrolase (Parg), mRNA.                                                           |
| scl46303.7     | 279-S  | 28.1372 | 1.34 | Lrp10         | NM_022993.2 | Mus musculus low-density lipoprotein receptor-related protein 10 (Lrp10), mRNA.                                       |
| scl48545.9.1   | 240-S  | 28.1332 | 4.26 | D630035O19Rik | NM_145932   | Mus musculus RIKEN cDNA D630035O19 gene (D630035O19Rik), mRNA.                                                        |
| scl068066.1    | 115-S  | 28.1301 | 1.3  | D11Erd333e    | NM_026542.1 |                                                                                                                       |
| scl54562.12.1  | 64-S   | 28.119  | 2.43 | Alas2         | NM_009653.1 | Mus musculus aminolevulinic acid synthase 2, erythroid (Alas2), mRNA.                                                 |
| scl056438.5    | 27-S   | 28.1058 | 1.22 | Rbx1          | NM_019712.2 | Mus musculus ring-box 1 (Rbx1), mRNA.                                                                                 |
| scl45906.4.1   | 41-S   | 28.0882 | 2.64 | Fhit          | NM_010210.1 | Mus musculus fragile histidine triad gene (Fhit), mRNA.                                                               |
| scl000098.1    | 12-S   | 27.991  | 1.38 | O610007P22Rik | NM_026676.1 | Mus musculus RIKEN cDNA O610007P22 gene (O610007P22Rik), mRNA.                                                        |
| scl46082.11    | 140-S  | 27.9824 | 1.33 | Tgfb14        | NM_009366.1 | Mus musculus transforming growth factor beta 1 induced transcript 4 (Tgfb14), mRNA.                                   |
| scl0017168.2   | 280-S  | 27.9818 | 4.73 | Mare          | NM_181569.1 | Mus musculus alpha globin regulatory element containing gene (Mare), mRNA.                                            |
| scl0319721.1   | 96-S   | 27.9658 | 4.32 | C030002J06Rik | NM_176988.1 | Mus musculus RIKEN cDNA C030002J06 gene (C030002J06Rik), mRNA.                                                        |
| scl22134.5     | 174-S  | 27.9643 | 1.25 | Pfn2          | NM_019410.2 | Mus musculus profilin 2 (Pfn2), mRNA.                                                                                 |
| scl35088.19    | 67-S   | 27.9514 | 7.46 | Tubgcp3       | NM_198031.1 | Mus musculus tubulin, gamma complex associated protein 3 (Tubgcp3), mRNA.                                             |
| scl0002157.1   | 164-S  | 27.922  | 5.61 | Kcnn2         | NM_080465.1 | Mus musculus potassium intermediate/small conductance calcium-activated channel, subfamily N, member 2 (Kcnn2), mRNA. |
| scl070767.1    | 256-S  | 27.907  | 1.94 | Prpf3         | NM_027541.2 | Mus musculus PRP3 pre-mRNA processing factor 3 homolog (yeast) (Prpf3), mRNA.                                         |
| scl33986.7.1   | 21-S   | 27.8997 | 1.3  | Ank1          | NM_031158.1 | Mus musculus ankyrin 1, erythroid (Ank1), mRNA.                                                                       |
| scl067869.4    | 264-S  | 27.8945 | 1.46 | Paip2         | NM_026420.1 | Mus musculus polyadenylate-binding protein-interacting protein 2 (Paip2), mRNA.                                       |
| scl49386.9     | 715-S  | 27.871  | 1.26 | Ppm1f         | NM_176833.2 | Mus musculus protein phosphatase 1F (PP2C domain containing) (Ppm1f), mRNA.                                           |
| scl36473.24.9  | 6-S    | 27.8605 | 1.39 | Usp4          | NM_011678.1 | Mus musculus ubiquitin specific protease 4 (proto-oncogene) (Usp4), mRNA.                                             |
| scl0110323.3   | 24-S   | 27.8469 | 1.26 | Cox6b         | NM_025628.1 | Mus musculus cytochrome c oxidase, subunit VIb (Cox6b), mRNA.                                                         |
| scl47173.4.1   | 30-S   | 27.842  | 1.63 | 8230402K04Rik | NM_177755.2 |                                                                                                                       |
| scl00231999.2  | 275-S  | 27.82   | 1.93 | BC052360      | XM_132552.3 |                                                                                                                       |
| scl17473.2     | 640-S  | 27.8186 | 2.02 | Lrrn2         | XM_136224.2 | Mus musculus leucine rich repeat protein 2, neuronal (Lrrn2), mRNA.                                                   |
| scl0021969.2   | 46-S   | 27.8043 | 1.93 | Top1          | NM_009408.1 | Mus musculus topoisomerase (DNA) I (Top1), mRNA.                                                                      |
| scl33040.15.1  | 23-S   | 27.7998 | 1.71 | A1325941      | NM_178900.2 | Mus musculus expressed sequence A1325941 (A1325941), mRNA.                                                            |
| scl43073.2     | 375-S  | 27.7633 | 1.37 | Hspa2         | NM_008301.2 | Mus musculus heat shock protein 2 (Hspa2), mRNA.                                                                      |
| scl0217333.1   | 84-S   | 27.7371 | 1.37 | Trim47        | NM_172570.2 | Mus musculus tripartite motif protein 47 (Trim47), mRNA.                                                              |
| scl23719.3     | 55-S   | 27.732  | 3.82 | Gpr3          | NM_008154.1 | Mus musculus G-protein coupled receptor 3 (Gpr3), mRNA.                                                               |
| scl17355.9     | 0-S    | 27.6874 | 2.5  | Glul          | NM_008131.2 | Mus musculus glutamate-ammonia ligase (glutamine synthase) (Glul), mRNA.                                              |
| scl53400.8.1   | 51-S   | 27.6705 | 1.23 | D19Erd721e    | NM_146093.1 | Mus musculus DNA segment, Chr 19, ERATO Doi 721, expressed (D19Erd721e), mRNA.                                        |
| scl34524.3     | 290-S  | 27.6619 | 1.48 | Siah1a        | NM_009172.1 | Mus musculus seven in absentia 1A (Siah1a), mRNA.                                                                     |
| scl54248.9.17  | 2-S    | 27.6562 | 1.96 | Gpc3          | NM_016697.2 | Mus musculus glypican 3 (Gpc3), mRNA.                                                                                 |
| scl47095.40    | 145-S  | 27.6541 | 1.32 | Ptk2          | NM_007982.1 | Mus musculus PTK2 protein tyrosine kinase 2 (Ptk2), mRNA.                                                             |
| scl0066775.2   | 265-S  | 27.6479 | 2.25 | 4933428I03Rik | NM_025760.2 | Mus musculus RIKEN cDNA 4933428I03 gene (4933428I03Rik), mRNA.                                                        |
| scl40126.18    | 106-S  | 27.601  | 1.47 | Epn2          | NM_010148.1 | Mus musculus epsin 2 (Epn2), mRNA.                                                                                    |
| scl0011977.1   | 52-S   | 27.5805 | 2.31 | Atp7a         | NM_009726.2 | Mus musculus ATPase, Cu++ transporting, alpha polypeptide (Atp7a), mRNA.                                              |
| scl072554.6    | 30-S   | 27.5689 | 2.74 | Utp14a        | XM_135857.4 |                                                                                                                       |
| scl24344.15.1  | 2-S    | 27.5623 | 1.48 | Txndc4        | NM_029572.1 | Mus musculus thioredoxin domain containing 4 (endoplasmic reticulum) (Txndc4), mRNA.                                  |
| scl35449.1.1   | 268-S  | 27.5479 | 3.42 | B830007D08Rik | XM_150222.1 | Mus musculus RIKEN cDNA B830007D08 gene (B830007D08Rik), mRNA.                                                        |
| scl21259.14    | 115-S  | 27.5383 | 5.11 | P1xdc2        | NM_026162.2 | Mus musculus plexin domain containing 2 (P1xdc2), mRNA.                                                               |
| scl35976.44    | 48-S   | 27.5273 | 2.78 | Arhgef12      | NM_027144.1 | Mus musculus Rho guanine nucleotide exchange factor (GEF) 12 (Arhgef12), mRNA.                                        |
| scl31785.1.4   | 192-S  | 27.5158 | 1.53 | Rasl2-9       | NM_009028.1 | Mus musculus RAS-like, family 2, locus 9 (Rasl2-9), mRNA.                                                             |
| scl0055943.1   | 284-S  | 27.4687 | 1.46 | Stx8          | NM_018768.1 | Mus musculus syntaxin 8 (Stx8), mRNA.                                                                                 |
| scl0024074.2   | 26-S   | 27.4559 | 4.59 | Taf7          |             |                                                                                                                       |
| scl17938.36.1  | 1-S    | 27.4146 | 2.5  | Aox3          | NM_023617.1 |                                                                                                                       |
| scl00218214.2  | 131-S  | 27.4044 | 1.91 | Aof1          | NM_172262.1 | Mus musculus amine oxidase, flavin containing 1 (Aof1), mRNA.                                                         |
| scl47392.22    | 290-S  | 27.3583 | 1.91 | Rai14         | NM_030690.2 | Mus musculus retinoic acid induced 14 (Rai14), mRNA.                                                                  |
| scl0317757.1   | 85-S   | 27.3575 | 4.97 | E230026N22Rik | NM_175035.3 | Mus musculus RIKEN cDNA E230026N22 gene (E230026N22Rik), mRNA.                                                        |
| scl0001695.1   | 1621-S | 27.3495 | 1.26 | Ppm1b         | NM_011151.1 | Mus musculus protein phosphatase 1B, magnesium dependent, beta isoform (Ppm1b), mRNA.                                 |
| scl0017159.2   | 303-S  | 27.3139 | 1.28 | Man2b1        | NM_010764   | Mus musculus mannosidase 2, alpha B1 (Man2b1), mRNA.                                                                  |
| scl0218333.1   | 228-S  | 27.2662 | 1.32 | BC018507      | XM_358313.1 | Mus musculus cDNA sequence BC018507 (BC018507), mRNA.                                                                 |
| scl47700.4     | 662-S  | 27.2505 | 2.74 | A1481750      | NM_145473.1 | Mus musculus expressed sequence A1481750 (A1481750), mRNA.                                                            |

|                      |         |      |               |             |                                                                                                        |
|----------------------|---------|------|---------------|-------------|--------------------------------------------------------------------------------------------------------|
| IGKV4-75_AJ231227_ig | 27.2439 | 6.31 |               |             |                                                                                                        |
| scl0234988.3_288-S   | 27.2326 | 5.25 | Mbd3l2        | NM_144934.2 | Mus musculus methyl-CpG binding domain protein 3-like 2 (Mbd3l2), mRNA.                                |
| scl070302.4_170-S    | 27.2306 | 1.8  | 3110050K21Rik | XM_127780.4 | Mus musculus RIKEN cDNA 3110050K21 gene (3110050K21Rik), mRNA.                                         |
| scl30676.4_510-S     | 27.2295 | 2.83 | 2410170E21Rik | NM_029420.1 | Mus musculus RIKEN cDNA 2410170E21 gene (2410170E21Rik), mRNA.                                         |
| scl39638.4.1_92-S    | 27.2012 | 1.39 | Rpl23         | NM_022891.1 | Mus musculus ribosomal protein L23 (Rpl23), mRNA.                                                      |
| scl34795.4.1_9-S     | 27.1828 | 1.26 | Sap30         | NM_021788.1 | Mus musculus sin3 associated polypeptide (Sap30), mRNA.                                                |
| scl24875.11.1_30-S   | 27.1286 | 1.49 | Taf12         | NM_025579.1 | Mus musculus TAF12 RNA polymerase II, TATA box binding protein (TBP)-associated factor (Taf12), mRNA.  |
| scl36724.29_71-S     | 27.0258 | 1.58 | Nedd4         | NM_010890.2 | Mus musculus neural precursor cell expressed, developmentally down-regulated gene 4 (Nedd4), mRNA.     |
| scl0078757.1_96-S    | 27.0007 | 1.35 | 4921505C17Rik | NM_030168.2 | Mus musculus RIKEN cDNA 4921505C17 gene (4921505C17Rik), mRNA.                                         |
| scl0023808.2_287-S   | 26.9903 | 1.47 | Ash2l         | NM_011791.1 | Mus musculus ash2 (absent, small, or homeotic)-like (Drosophila) (Ash2l), mRNA.                        |
| scl00320165.1_190-S  | 26.972  | 1.28 | B230378H13Rik | NM_177089.3 |                                                                                                        |
| scl34385.6.1_0-S     | 26.9105 | 6.11 | Lcat          | NM_008490.1 | Mus musculus lecithin cholesterol acyltransferase (Lcat), mRNA.                                        |
| scl019395.3_4-S      | 26.8891 | 4.91 | Rasgrp2       | XM_359299.1 | Mus musculus RAS, guanyl releasing protein 2 (Rasgrp2), mRNA.                                          |
| scl43398.10.1_4-S    | 26.8791 | 1.24 | Laptm4a       | NM_008640.1 | Mus musculus lysosomal-associated protein transmembrane 4A (Laptm4a), mRNA.                            |
| scl32679.14.1_2-S    | 26.7532 | 4.62 | Tulp2         | NM_008807.1 | Mus musculus tubby-like protein 2 (Tulp2), mRNA.                                                       |
| scl0026932.2_213-S   | 26.7294 | 1.39 | Ppp2r5e       | NM_012024.1 | Mus musculus protein phosphatase 2, regulatory subunit B (B56), epsilon isoform (Ppp2r5e), mRNA.       |
| scl00103850.1_287-S  | 26.7237 | 1.37 | Ni5m          | NM_134029.1 | Mus musculus 5.3-nucleotidase, mitochondrial (Ni5m), mRNA.                                             |
| scl069038.2_4-S      | 26.6712 | 1.22 | 1810006K21Rik | XM_207074   | Mus musculus RIKEN cDNA 1810006K21 gene (1810006K21Rik), mRNA.                                         |
| scl0024061.1_292-S   | 26.6039 | 1.34 | Smc11         | NM_019710.1 | Mus musculus SMC (structural maintenance of chromosomes 1)-like 1 (S. cerevisiae) (Smc11), mRNA.       |
| scl23497.11_62-S     | 26.5942 | 1.4  | Pex14         | NM_019781.1 | Mus musculus peroxisomal biogenesis factor 14 (Pex14), mRNA.                                           |
| scl18413.5.1_0-S     | 26.5777 | 2.2  | 9430008C03Rik | XM_149251.3 | Mus musculus RIKEN cDNA 9430008C03 gene (9430008C03Rik), mRNA.                                         |
| scl00104479.1_248-S  | 26.5123 | 1.59 | BC018601      | NM_134033.1 | Mus musculus cDNA sequence BC018601 (BC018601), mRNA.                                                  |
| scl33446.12_65-S     | 26.4873 | 1.35 | Cdh5          | NM_009868   | Mus musculus cadherin 5 (Cdh5), mRNA.                                                                  |
| scl31483.18_189-S    | 26.47   | 1.4  | 4931406P16Rik | NM_172741.1 | Mus musculus RIKEN cDNA 4931406P16 gene (4931406P16Rik), mRNA.                                         |
| scl0216760.3_93-S    | 26.4637 | 1.74 | Mfap3         | NM_145426.1 |                                                                                                        |
| scl0213499.8_8-S     | 26.4523 | 5.16 | Fbxo42        | NM_172518.2 |                                                                                                        |
| scl019326.1_315-S    | 26.4444 | 1.32 | Rab11b        | NM_008997.1 | Mus musculus RAB11B, member RAS oncogene family (Rab11b), mRNA.                                        |
| scl50305.48_81-S     | 26.4342 | 1.27 | Igf2r         | NM_010515.1 | Mus musculus insulin-like growth factor 2 receptor (Igf2r), mRNA.                                      |
| scl0068682.1_300-S   | 26.4265 | 1.27 | 1110028E10Rik | NM_152808.1 | Mus musculus RIKEN cDNA 1110028E10 gene (1110028E10Rik), mRNA.                                         |
| scl41711.15_185-S    | 26.4233 | 2.96 | Fbxw11        | NM_134015.1 |                                                                                                        |
| scl0110265.1_302-S   | 26.4207 | 3.03 | MsrA          | NM_026322.2 | Mus musculus methionine sulfoxide reductase A (MsrA), mRNA.                                            |
| scl29286.18.1_125-S  | 26.4072 | 1.74 | Ica1          | NM_010492.2 | Mus musculus islet cell autoantigen 1 (Ica1), mRNA.                                                    |
| scl45913.15.1_122-S  | 26.3724 | 3.6  | Acox2         | NM_053115.1 | Mus musculus acyl-Coenzyme A oxidase 2, branched chain (Acox2), mRNA.                                  |
| scl29671.63_470-S    | 26.3672 | 1.37 | Itp1          | NM_010585.2 | Mus musculus inositol 1,4,5-triphosphate receptor 1 (Itp1), mRNA.                                      |
| scl074302.1_207-S    | 26.3667 | 3.15 | Mtmr3         | NM_028860.1 | Mus musculus myotubularin related protein 3 (Mtmr3), mRNA.                                             |
| scl45854.5_74-S      | 26.3611 | 1.87 | Usp54         | NM_030180.1 | Mus musculus ubiquitin specific protease 54 (Usp54), mRNA.                                             |
| scl23632.8_120-S     | 26.3031 | 2.99 | Ubx3          | NM_178671.2 | Mus musculus UBX domain containing 3 (Ubx3), mRNA.                                                     |
| scl00224023.1_141-S  | 26.2924 | 1.46 | 261031818Rik  | NM_145479   | Mus musculus RIKEN cDNA 261031818 gene (261031818Rik), mRNA.                                           |
| scl0104871.12_180-S  | 26.2819 | 1.57 | Al661438      | NM_178914.3 |                                                                                                        |
| scl31965.9_618-S     | 26.2673 | 1.25 | C430003P19Rik | NM_198017.1 | Mus musculus RIKEN cDNA C430003P19 gene (C430003P19Rik), mRNA.                                         |
| scl013000.1_10-S     | 26.2607 | 1.43 | Csnk2a2       | NM_009974.2 | Mus musculus casein kinase II, alpha 2, polypeptide (Csnk2a2), mRNA.                                   |
| scl45419.1.422_138-S | 26.2462 | 1.3  | Extl3         | NM_018788.2 | Mus musculus exostosins (multiple)-like 3 (Extl3), mRNA.                                               |
| scl067116.1_6-S      | 26.2453 | 1.32 | Cuedc2        | NM_024192.1 | Mus musculus CUE domain containing 2 (Cuedc2), mRNA.                                                   |
| scl38236.13.428_30-S | 26.241  | 2.6  | Magi1         | NM_172546.1 | Mus musculus membrane associated guanylate kinase interacting protein-like 1 (Magi1), mRNA.            |
| scl26903.5_40-S      | 26.239  | 2.49 | Al481214      | NM_054098.2 |                                                                                                        |
| scl00102791.2_289-S  | 26.237  | 1.69 | Tcta          | NM_133986.1 |                                                                                                        |
| scl16734.10.1_6-S    | 26.2322 | 1.76 | Clk1          | NM_009905.1 |                                                                                                        |
| scl46638.4_82-S      | 26.1981 | 1.62 | Kctd6         | NM_027782.1 | Mus musculus potassium channel tetramerisation domain containing 6 (Kctd6), mRNA.                      |
| scl068708.1_138-S    | 26.1941 | 1.69 | Rabl2a        | NM_026817.1 | Mus musculus RAB, member of RAS oncogene family-like 2A (Rabl2a), mRNA.                                |
| scl26971.4.541_0-S   | 26.1658 | 1.24 | Rpo1-3        | NM_009087.1 | Mus musculus RNA polymerase 1-3 (Rpo1-3), mRNA.                                                        |
| scl0018845.2_170-S   | 26.1546 | 1.36 | Plexna2       | NM_008882.1 | Mus musculus plexin A2 (Plexna2), mRNA.                                                                |
| scl29584.3_468-S     | 26.1529 | 1.27 | Zfp637        | NM_177684.2 |                                                                                                        |
| scl47734.11_199-S    | 26.1422 | 1.35 | Map3k7ip1     | NM_025609.2 | Mus musculus mitogen-activated protein kinase kinase kinase 7 interacting protein 1 (Map3k7ip1), mRNA. |
| scl000501.1_12-S     | 26.1366 | 2.64 | Uhrf2         | NM_144873.1 | Mus musculus ubiquitin-like, containing PHD and RING finger domains 2 (Uhrf2), mRNA.                   |
| scl47579.6.1_16-S    | 26.134  | 1.39 | B930062P21Rik | NM_178789.2 | Mus musculus RIKEN cDNA B930062P21 gene (B930062P21Rik), mRNA.                                         |
| scl41150.22.1_20-S   | 26.1231 | 1.24 | Cmya4         | NM_178680.2 | Mus musculus cardiomyopathy associated 4 (Cmya4), mRNA.                                                |

|                 |        |         |      |               |             |                                                                                              |
|-----------------|--------|---------|------|---------------|-------------|----------------------------------------------------------------------------------------------|
| sci0002727.1    | 932-S  | 26.119  | 3.13 | Thea          | NM_025590.3 | Mus musculus thioesterase, adipose associated (Thea), mRNA.                                  |
| sci53499.1.4    | 164-S  | 26.1027 | 5.55 | 1700020D05Rik | NM_023781.3 | Mus musculus RIKEN cDNA 1700020D05 gene (1700020D05Rik), mRNA.                               |
| sci027967.3     | 2-S    | 26.0921 | 1.5  | Cherp         | NM_138585.2 | Mus musculus calcium homeostasis endoplasmic reticulum protein (Cherp), mRNA.                |
| sci0067665.1    | 200-S  | 26.0752 | 1.24 | Dctn4         | NM_026302.2 | Mus musculus dynactin 4 (Dctn4), mRNA.                                                       |
| sci0016997.2    | 276-S  | 26.0667 | 1.72 | Ltp2          | NM_013589.1 | Mus musculus latent transforming growth factor beta binding protein 2 (Ltp2), mRNA.          |
| sci00216233.1   | 1004-S | 26.0567 | 1.94 | Socs2         | NM_007706.1 | Mus musculus suppressor of cytokine signaling 2 (Socs2), mRNA.                               |
| sci22226.9.1    | 81-S   | 26.0371 | 1.25 | Nudt6         | NM_153561.1 | Mus musculus nudix (nucleoside diphosphate linked moiety X)-type motif 6 (Nudt6), mRNA.      |
| sci0208715.1    | 140-S  | 26.0362 | 1.37 | Hmgcs1        | NM_145942.2 | Mus musculus 3-hydroxy-3-methylglutaryl-Coenzyme A synthase 1 (Hmgcs1), mRNA.                |
| sci097820.1     | 227-S  | 26.015  | 1.21 | 4833439L19Rik | NM_133797   | Mus musculus RIKEN cDNA 4833439L19 gene (4833439L19Rik), mRNA.                               |
| sci00347722.2   | 310-S  | 26.0079 | 1.46 | Centg2        | NM_178119.2 | Mus musculus centaurin, gamma 2 (Centg2), mRNA.                                              |
| sci0077590.2    | 319-S  | 26.0041 | 1.95 | 4631426J05Rik | NM_029935.2 | Mus musculus RIKEN cDNA 4631426J05 gene (4631426J05Rik), mRNA.                               |
| sci00213484.2   | 217-S  | 25.9848 | 1.43 | BC036718      | NM_153136.1 | Mus musculus cDNA sequence BC036718 (BC036718), mRNA.                                        |
| sci29492.60.1   | 120-S  | 25.9375 | 1.37 | Vwf           | NM_011708.2 | Mus musculus Von Willebrand factor homolog (Vwf), mRNA.                                      |
| sci22890.10.1   | 51-S   | 25.9293 | 1.8  | Tmod4         | NM_016712.1 | Mus musculus tropomodulin 4 (Tmod4), mRNA.                                                   |
| sci29880.12.1   | 23-S   | 25.926  | 2.46 | 0610039N19Rik | NM_026159.2 | Mus musculus RIKEN cDNA 0610039N19 gene (0610039N19Rik), mRNA.                               |
| sci0011569.2    | 215-S  | 25.896  | 2.98 | Aebp2         | NM_009637.1 | Mus musculus AE binding protein 2 (Aebp2), mRNA.                                             |
| sci015483.1     | 7-S    | 25.8933 | 1.5  | Hsd11b1       | NM_008288   | Mus musculus hydroxysteroid 11-beta dehydrogenase 1 (Hsd11b1), mRNA.                         |
| sci075267.1     | 5-S    | 25.8468 | 1.92 | 4930555L03Rik | XM_204030.1 |                                                                                              |
| sci34568.25     | 184-S  | 25.8427 | 1.71 | BC016188      | NM_145970.1 | Mus musculus cDNA sequence BC016188 (BC016188), mRNA.                                        |
| sci0001585.1    | 28-S   | 25.8142 | 2.27 | Hdac5         | NM_010412.2 | Mus musculus histone deacetylase 5 (Hdac5), mRNA.                                            |
| sci019358.2     | 23-S   | 25.7729 | 1.76 | Rad23a        | NM_009010.2 | Mus musculus RAD23a homolog (S. cerevisiae) (Rad23a), mRNA.                                  |
| sci44477.7      | 25-S   | 25.7627 | 3.64 | Ankra2        | NM_023472.1 | Mus musculus ankyrin repeat, family A (RFXANK-like), 2 (Ankra2), mRNA.                       |
| sci48261.13.240 | 30-S   | 25.7534 | 1.22 | Cct8          | NM_009840.2 | Mus musculus chaperonin subunit 8 (theta) (Cct8), mRNA.                                      |
| sci26699.18.1   | 4-S    | 25.7483 | 1.6  | 2610033H07Rik | NM_029278.1 | Mus musculus RIKEN cDNA 2610033H07 gene (2610033H07Rik), mRNA.                               |
| sci014630.7     | 323-S  | 25.7418 | 2.57 | Gclm          | NM_008129.2 | Mus musculus glutamate-cysteine ligase, modifier subunit (Gclm), mRNA.                       |
| sci020916.11    | 281-S  | 25.7138 | 1.6  | Sucla2        | XM_127733.2 | Mus musculus succinate-Coenzyme A ligase, ADP-forming, beta subunit (Sucla2), mRNA.          |
| sci011722.3     | 4-S    | 25.7129 | 2.18 | Amy1          | NM_007446.1 | Mus musculus amylase 1, salivary (Amy1), mRNA.                                               |
| sci00234725.2   | 22-S   | 25.7114 | 2.12 | Zfp612        | NM_175480.3 | Mus musculus zinc finger protein 612 (Zfp612), mRNA.                                         |
| sci43387.27.1   | 23-S   | 25.6962 | 1.45 | Smc61l        | NM_025695.2 | Mus musculus SMC6 structural maintenance of chromosomes 6-like 1 (yeast) (Smc61l), mRNA.     |
| sci065111.1     | 137-S  | 25.6886 | 1.49 | Dap3          | NM_022994.2 | Mus musculus death associated protein 3 (Dap3), mRNA.                                        |
| sci00226539.2   | 30-S   | 25.6425 | 1.78 | 5830468K18Rik | NM_172644.1 | Mus musculus RIKEN cDNA 5830468K18 gene (5830468K18Rik), mRNA.                               |
| sci0021681.1    | 61-S   | 25.6416 | 1.32 | Thoc4         | NM_011568.1 |                                                                                              |
| sci38420.17.1   | 82-S   | 25.6224 | 3.48 | Ptprr         | NM_011217.1 | Mus musculus protein tyrosine phosphatase, receptor type, R (Ptprr), mRNA.                   |
| sci0014858.1    | 22-S   | 25.6206 | 3.53 | Gsta2         | NM_008182.1 | Mus musculus glutathione S-transferase, alpha 2 (Yc2) (Gsta2), mRNA.                         |
| sci23964.7.1    | 102-S  | 25.6034 | 1.22 | 2810405F18Rik | NM_028142.1 | Mus musculus RIKEN cDNA 2810405F18 gene (2810405F18Rik), mRNA.                               |
| sci0056351.1    | 126-S  | 25.5974 | 1.25 | Tebp          | NM_019766.2 | Mus musculus telomerase binding protein, p23 (Tebp), mRNA.                                   |
| sci00023.1      | 1-S    | 25.5895 | 3.1  | Cyp2a5        | NM_007812.1 | Mus musculus cytochrome P450, family 2, subfamily a, polypeptide 5 (Cyp2a5), mRNA.           |
| sci0002264.1    | 586-S  | 25.5855 | 1.37 | Epc1          | NM_007935.1 | Mus musculus enhancer of polycomb homolog 1 (Drosophila) (Epc1), transcript variant 2, mRNA. |
| sci46990.11.1   | 92-S   | 25.5841 | 4.72 | Il2rb         | NM_008368.3 | Mus musculus interleukin 2 receptor, beta chain (Il2rb), mRNA.                               |
| sci068738.1     | 270-S  | 25.5797 | 1.33 | Acas2l        | NM_080575.1 | Mus musculus acetyl-Coenzyme A synthetase 2 (AMP forming)-like (Acas2l), mRNA.               |
| sci29346.9.1    | 7-S    | 25.5256 | 1.27 | Mrps35        | NM_145573.1 | Mus musculus mitochondrial ribosomal protein S35 (Mrps35), mRNA.                             |
| sci41264.42.1   | 0-S    | 25.5174 | 1.27 | Prpf8         | NM_138659.1 | Mus musculus pre-mRNA processing factor 8 (Prpf8), mRNA.                                     |
| sci0227290.1    | 240-S  | 25.5112 | 1.35 | Aamp          | NM_146110.1 | Mus musculus angio-associated migratory protein (Aamp), mRNA.                                |
| sci022152.4     | 13-S   | 25.509  | 2.76 | Tubb3         | NM_023279.2 | Mus musculus tubulin, beta 3 (Tubb3), mRNA.                                                  |
| sci0231503.1    | 74-S   | 25.4947 | 3.92 | BC062109      | NM_182841.1 |                                                                                              |
| sci0027029.2    | 174-S  | 25.4917 | 1.57 | Sgsh          | NM_018822.2 | Mus musculus N-sulfoglucosamine sulfohydrolase (sulfamidase) (Sgsh), mRNA.                   |
| sci0068501.1    | 28-S   | 25.4867 | 4.04 | 1110014D18Rik | NM_026746.1 | Mus musculus RIKEN cDNA 1110014D18 gene (1110014D18Rik), mRNA.                               |
| sci28523.18.1   | 12-S   | 25.4441 | 1.34 | Raf1          | NM_029780.1 | Mus musculus v-raf-1 leukemia viral oncogene 1 (Raf1), mRNA.                                 |
| sci32669.8.1    | 3-S    | 25.4239 | 1.76 | Car11         | NM_009800.2 | Mus musculus carbonic anhydrase 11 (Car11), mRNA.                                            |
| sci35535.28     | 151-S  | 25.4188 | 1.31 | Ibtk          | XM_135030.4 |                                                                                              |
| sci0015950.1    | 6-S    | 25.4151 | 1.69 | Ifi203        | NM_008328.1 | Mus musculus interferon activated gene 203 (Ifi203), mRNA.                                   |
| sci00238247.1   | 16-S   | 25.4103 | 3.77 | Arid4a        | XM_354675.1 |                                                                                              |
| sci0104771.9    | 30-S   | 25.4007 | 1.27 | 1200003C05Rik | NM_024205.1 | Mus musculus RIKEN cDNA 1200003C05 gene (1200003C05Rik), mRNA.                               |
| sci54930.9.1    | 1-S    | 25.3966 | 1.23 | Hprt          | NM_013556   |                                                                                              |
| sci020926.1     | 330-S  | 25.3769 | 1.54 | Sup16h        | NM_009297.1 | Mus musculus suppressor of Ty 6 homolog (S. cerevisiae) (Sup16h), mRNA.                      |
| sci29041.8.1    | 24-S   | 25.3452 | 1.56 | 1810009M01Rik | NM_023056.2 | Mus musculus RIKEN cDNA 1810009M01 gene (1810009M01Rik), mRNA.                               |

|                |       |         |      |               |             |                                                                                                                                 |
|----------------|-------|---------|------|---------------|-------------|---------------------------------------------------------------------------------------------------------------------------------|
| sci00268490.1  | 147-S | 25.3372 | 1.46 | 2600001B17Rik | NM_172947.1 |                                                                                                                                 |
| sci36548.17    | 86-S  | 25.3261 | 1.25 | Ryk           | NM_013649.2 | Mus musculus receptor-like tyrosine kinase (Ryk), mRNA.                                                                         |
| sci018655.12   | 25-S  | 25.3219 | 1.21 | Pgk1          | NM_008828   | Mus musculus phosphoglycerate kinase 1 (Pgk1), mRNA.                                                                            |
| sci067665.1    | 0-S   | 25.3114 | 3.43 | Dctn4         | NM_026302.2 | Mus musculus dynactin 4 (Dctn4), mRNA.                                                                                          |
| sci24593.4     | 239-S | 25.3054 | 1.32 | 2310042D19Rik | NM_172417.1 | Mus musculus RIKEN cDNA 2310042D19 gene (2310042D19Rik), mRNA.                                                                  |
| sci0004042.1   | 234-S | 25.304  | 2.49 | Fin29         | NM_172275.1 | Mus musculus FLN29 gene product (Fin29), mRNA.                                                                                  |
| sci0217837.1   | 325-S | 25.2808 | 1.52 | Itpk1         | NM_172584.1 | Mus musculus inositol 1,3,4-triphosphate 5/6 kinase (Itpk1), mRNA.                                                              |
| sci058809.2    | 14-S  | 25.2673 | 1.5  | Rnase4        | NM_021472.1 | Mus musculus ribonuclease, RNase A family 4 (Rnase4), mRNA.                                                                     |
| sci0230796.1   | 23-S  | 25.245  | 3.4  | Wdtdc1        | NM_199306.1 |                                                                                                                                 |
| sci55039.15    | 103-S | 25.2077 | 1.4  | Ddx3x         | NM_010028   | Mus musculus DEAD/H (Asp-Glu-Ala-Asp/His) box polypeptide 3, X-linked (Ddx3x), mRNA.                                            |
| sci49875.3     | 8-S   | 25.138  | 1.86 | Mad21bp       | NM_025649.1 | Mus musculus MAD2L1 binding protein (Mad21bp), mRNA.                                                                            |
| sci34623.10.1  | 30-S  | 25.1378 | 1.83 | Tmem34        | NM_145599.2 |                                                                                                                                 |
| sci0235072.13  | 139-S | 25.1344 | 1.63 |               | 39332       | Mus musculus septin 7 (Sept7), mRNA.                                                                                            |
| sci018771.13   | 29-S  | 25.1205 | 1.98 | Pknox1        | NM_016670.2 | Mus musculus Pbx/knotted 1 homeobox (Pknox1), mRNA.                                                                             |
| sci53380.11    | 494-S | 25.1181 | 1.23 | Fads1         | NM_146094.1 | Mus musculus fatty acid desaturase 1 (Fads1), mRNA.                                                                             |
| sci38713.11.10 | 6-S   | 25.0905 | 1.28 | Bsg           | NM_009768.1 | Mus musculus basigin (Bsg), mRNA.                                                                                               |
| sci53438.9.1   | 79-S  | 25.0888 | 1.36 | Ndufv1        | NM_133666.1 | Mus musculus NADH dehydrogenase (ubiquinone) flavoprotein 1 (Ndufv1), mRNA.                                                     |
| sci0001050.1   | 29-S  | 25.0547 | 1.31 | Grc2f         | NM_013536.1 | Mus musculus gene rich cluster, C2f gene (Grc2f), mRNA.                                                                         |
| sci056399.1    | 113-S | 25.0133 | 1.4  | Akap8         | NM_019774.2 | Mus musculus A kinase (PRKA) anchor protein 8 (Akap8), mRNA.                                                                    |
| sci00001.1     | 0-S   | 25.0003 | 1.48 | 2400010D15Rik | NM_029623.1 | Mus musculus RIKEN cDNA 2400010D15 gene (2400010D15Rik), mRNA.                                                                  |
| sci54295.26.1  | 21-S  | 24.9879 | 2.38 | Smarca1       | NM_053123.3 | Mus musculus SWI/SNF related, matrix associated, actin dependent regulator of chromatin, subfamily a, member 1 (Smarca1), mRNA. |
| sci0066870.1   | 13-S  | 24.9752 | 1.31 | 1200009K13Rik | NM_025814.1 | Mus musculus RIKEN cDNA 1200009K13 gene (1200009K13Rik), mRNA.                                                                  |
| sci0067123.2   | 83-S  | 24.9685 | 1.57 | Ubp1          | NM_023305.2 | Mus musculus ubiquitin-associated protein 1 (Ubp1), mRNA.                                                                       |
| sci0011677.2   | 223-S | 24.967  | 1.42 | Akr1b3        | NM_009658.2 | Mus musculus aldo-keto reductase family 1, member B3 (aldose reductase) (Akr1b3), mRNA.                                         |
| sci0219158.1   | 104-S | 24.9665 | 1.67 | 2610301G19Rik | XM_358314.1 | Mus musculus RIKEN cDNA 2610301G19 gene (2610301G19Rik), mRNA.                                                                  |
| sci19667.9.1   | 67-S  | 24.9462 | 1.29 | Rsu1          | NM_009105   | Mus musculus Ras suppressor protein 1 (Rsu1), mRNA.                                                                             |
| sci23237.22    | 584-S | 24.9452 | 1.52 | 3110057O12Rik | NM_026622.1 | Mus musculus RIKEN cDNA 3110057O12 gene (3110057O12Rik), mRNA.                                                                  |
| sci0016157.2   | 292-S | 24.9268 | 1.36 | Il1ra1        | NM_010549.1 | Mus musculus interleukin 11 receptor, alpha chain 1 (Il1ra1), mRNA.                                                             |
| sci1386.5.1    | 16-S  | 24.8975 | 6.4  | Al144495      | NM_015789.2 |                                                                                                                                 |
| sci50992.26    | 310-S | 24.8927 | 1.76 | Clcn7         | NM_011930.2 | Mus musculus chloride channel 7 (Clcn7), mRNA.                                                                                  |
| sci31589.11.1  | 58-S  | 24.8901 | 1.21 | Psmc4         | NM_011874.1 | Mus musculus proteasome (prosome, macropain) 26S subunit, ATPase, 4 (Psmc4), mRNA.                                              |
| sci38298.13.28 | 46-S  | 24.8669 | 1.38 | Atp5b         | NM_016774.2 | Mus musculus ATP synthase, H+ transporting mitochondrial F1 complex, beta subunit (Atp5b), mRNA.                                |
| sci000022.1    | 12-S  | 24.8306 | 1.25 | Cpt2          | NM_009949   | Mus musculus carnitine palmitoyltransferase 2 (Cpt2), mRNA.                                                                     |
| sci0029875.2   | 286-S | 24.8239 | 1.43 | Iqgap1        | NM_016721.1 | Mus musculus IQ motif containing GTPase activating protein 1 (Iqgap1), mRNA.                                                    |
| sci012909.6    | 94-S  | 24.8029 | 1.45 | Crp           | NM_007761.1 | Mus musculus calcitonin gene-related peptide-receptor component protein (Crp), mRNA.                                            |
| GI_7106304-S   |       | 24.7995 | 7.24 | En1           | NM_010133.1 | Mus musculus engrailed 1 (En1), mRNA.                                                                                           |
| sci0378466.6   | 0-S   | 24.7994 | 3.78 | 9330175B10Rik | NM_194351.1 | Mus musculus RIKEN cDNA 9330175B10 gene (9330175B10Rik), mRNA.                                                                  |
| sci42456.11    | 22-S  | 24.7942 | 3.25 | BC065123      | NM_172576.1 |                                                                                                                                 |
| sci33443.4.1   | 10-S  | 24.7887 | 7.14 | Cklsf2b       | NM_028524.1 | Mus musculus chemokine-like factor super family 2B (Cklsf2b), mRNA.                                                             |
| sci0075751.2   | 140-S | 24.7605 | 1.74 | Ipo4          | NM_024267.4 | Mus musculus importin 4 (Ipo4), mRNA.                                                                                           |
| sci0225341.10  | 229-S | 24.7444 | 1.52 | Lims2         | NM_144862.1 | Mus musculus LIM and senescent cell antigen like domains 2 (Lims2), mRNA.                                                       |
| sci011906.16   | 208-S | 24.6988 | 1.42 | Atbf1         | NM_007496.1 | Mus musculus AT motif binding factor 1 (Atbf1), mRNA.                                                                           |
| sci37463.11    | 46-S  | 24.6928 | 1.23 | Mdm2          | NM_010786.2 | Mus musculus transformed mouse 3T3 cell double minute 2 (Mdm2), mRNA.                                                           |
| sci39882.5     | 436-S | 24.6566 | 1.37 | A1316787      | NM_199199.1 | Mus musculus expressed sequence A1316787 (A1316787), mRNA.                                                                      |
| sci0001516.1   | 2-S   | 24.6458 | 2.46 | Sgcd          | NM_011891.2 | Mus musculus sarcoglycan, delta (dystrophin-associated glycoprotein) (Sgcd), mRNA.                                              |
| sci45165.9.4   | 29-S  | 24.6318 | 1.59 | Dct           | NM_010024   | Mus musculus dopachrome tautomerase (Dct), mRNA.                                                                                |
| sci45770.11.1  | 1-S   | 24.6111 | 1.23 | C77032        | NM_153547.2 | Mus musculus EST C77032 (C77032), transcript variant 1, mRNA.                                                                   |
| sci00239652.2  | 53-S  | 24.5984 | 3.47 | 9930016F01Rik | NM_173769.2 | Mus musculus RIKEN cDNA 9930016F01 gene (9930016F01Rik), mRNA.                                                                  |
| sci00353208.1  | 64-S  | 24.579  | 1.53 | 2810021G02Rik |             |                                                                                                                                 |
| sci46722.5     | 604-S | 24.5786 | 1.84 | BC035295      | NM_153407.1 | Mus musculus cDNA sequence BC035295 (BC035295), mRNA.                                                                           |
| sci23508.1.1   | 311-S | 24.5613 | 1.4  | Kif1b         | NM_207682.1 | Mus musculus kinesin family member 1B (Kif1b), transcript variant 1, mRNA.                                                      |
| sci0209039.30  | 312-S | 24.5597 | 2.19 | Tenc1         | NM_153533.1 | Mus musculus tensin like C1 domain-containing phosphatase (Tenc1), mRNA.                                                        |
| sci50307.11.1  | 44-S  | 24.5594 | 1.69 | Slc22a3       | NM_011395.1 | Mus musculus solute carrier family 22 (organic cation transporter), member 3 (Slc22a3), mRNA.                                   |
| sci0052231.1   | 82-S  | 24.5437 | 1.93 | D1Ert161e     | NM_026187.3 | Mus musculus DNA segment, Chr 1, ERA TO Do1 161, expressed (D1Ert161e), mRNA.                                                   |
| sci28403.9.1   | 10-S  | 24.5194 | 3.44 | Ltbr          | NM_010736.1 | Mus musculus lymphotoxin B receptor (Ltbr), mRNA.                                                                               |
| sci00394433.1  | 10-S  | 24.5136 | 2.48 | Ugt1a2        | NM_013701.1 |                                                                                                                                 |

|                     |         |      |               |              |                                                                                                         |
|---------------------|---------|------|---------------|--------------|---------------------------------------------------------------------------------------------------------|
| scl27525.13.1 50-S  | 24.5135 | 1.28 | Arhgap24      | NM_146161.1  | Mus musculus Rho GTPase activating protein 24 (Arhgap24), mRNA.                                         |
| scl012864.3 58-S    | 24.5035 | 1.3  | Cox6c         | NM_053071.1  | Mus musculus cytochrome c oxidase, subunit VIc (Cox6c), mRNA.                                           |
| scl21824.4.1 15-S   | 24.4868 | 1.57 | L259          | NM_153513.1  |                                                                                                         |
| scl059287.1 209-S   | 24.4849 | 1.24 | Ncstn         | NM_021607.2  | Mus musculus nicastrin (Ncstn), mRNA.                                                                   |
| scl054324.3 167-S   | 24.479  | 1.43 | Arhgef5       | XM_133067.3  | Mus musculus Rho guanine nucleotide exchange factor (GEF) 5 (Arhgef5), mRNA.                            |
| scl25795.24.1 9-S   | 24.477  | 2.57 | 2210010N04Rik | XM_149712.5  | Mus musculus RIKEN cDNA 2210010N04 gene (2210010N04Rik), mRNA.                                          |
| scl35713.2.1 23-S   | 24.4705 | 1.27 | 2300009A05Rik | XM_204313.2  | Mus musculus RIKEN cDNA 2300009A05 gene (2300009A05Rik), mRNA.                                          |
| scl33851.12.1 1-S   | 24.4626 | 1.33 | 1810047C23Rik | NM_138668.1  | Mus musculus RIKEN cDNA 1810047C23 gene (1810047C23Rik), mRNA.                                          |
| scl0070834.1 254-S  | 24.372  | 1.55 | Spag9         | NM_027569.1  | Mus musculus sperm associated antigen 9 (Spag9), mRNA.                                                  |
| scl0110796.1 34-S   | 24.3717 | 1.27 | Sdccag33      | XM_129060.3  | Mus musculus serologically defined colon cancer antigen 33 (Sdccag33), mRNA.                            |
| scl000985.1 28-S    | 24.2903 | 4.29 | Tsga10        | NM_207228    | Mus musculus testis specific 10 (Tsga10), mRNA.                                                         |
| scl0229473.1 11-S   | 24.2847 | 1.4  | D930015E06Rik | NM_172681.2  | Mus musculus RIKEN cDNA D930015E06 gene (D930015E06Rik), mRNA.                                          |
| scl026874.2 21-S    | 24.2811 | 3.85 | Abcd2         | NM_011994.1  | Mus musculus ATP-binding cassette, sub-family D (ALD), member 2 (Abcd2), mRNA.                          |
| scl077574.1 0-S     | 24.2227 | 2.28 | 3321401G04Rik | XM_133096.5  |                                                                                                         |
| scl0228983.14 82-S  | 24.2021 | 1.23 | Osbpl2        | NM_144500.1  | Mus musculus oxysterol binding protein-like 2 (Osbpl2), mRNA.                                           |
| scl0056542.1 233-S  | 24.1929 | 1.51 | Ick           | NM_019987.1  | Mus musculus intestinal cell kinase (Ick), mRNA.                                                        |
| scl00328468.1 58-S  | 24.1449 | 2.2  | C330046E03    |              |                                                                                                         |
| scl21165.1.12 85-S  | 24.137  | 2.2  | Bmyc          | NM_023326    | Mus musculus brain expressed myelocytomatosis oncogene (Bmyc), mRNA.                                    |
| scl30591.7 70-S     | 24.1299 | 4.69 | Zfpn1a5       | NM_175115.4  | Mus musculus zinc finger protein, subfamily 1A, 5 (Zfpn1a5), mRNA.                                      |
| scl0002307.1 1088-S | 24.1245 | 2.13 | Rps6ka5       | NM_153587    | Mus musculus ribosomal protein S6 kinase, polypeptide 5 (Rps6ka5), mRNA.                                |
| scl18363.8 35-S     | 24.1212 | 1.89 | Sdc4          | NM_011521.1  | Mus musculus syndecan 4 (Sdc4), mRNA.                                                                   |
| scl014252.10 327-S  | 24.1027 | 1.53 | Flot2         | NM_008028.1  | Mus musculus flotillin 2 (Flot2), mRNA.                                                                 |
| scl00234797.2 307-S | 24.0659 | 2.04 | 6430548M08Rik | NM_172286.2  | Mus musculus RIKEN cDNA 6430548M08 gene (6430548M08Rik), mRNA.                                          |
| scl0194404.1 81-S   | 24.0583 | 1.48 | BC030863      | XM_359324.1  | Mus musculus cDNA sequence BC030863 (BC030863), mRNA.                                                   |
| scl29342.18 151-S   | 24.0264 | 1.48 | 1810060J02Rik | NM_025911.1  | Mus musculus RIKEN cDNA 1810060J02 gene (1810060J02Rik), mRNA.                                          |
| scl42553.13 222-S   | 24.0242 | 1.31 | Hbp1          | NM_153198    | Mus musculus high mobility group box transcription factor 1 (Hbp1), mRNA.                               |
| scl23164.14.1 82-S  | 24.018  | 1.22 | D3ErtD194e    | XM_130881.3  | Mus musculus DNA segment, Chr 3, ERATO Doi 194, expressed (D3ErtD194e), mRNA.                           |
| scl53489.23 479-S   | 24.0088 | 1.8  | Pacs1         | XM_283545.1  | Mus musculus phosphofurin acidic cluster sorting protein 1 (Pacs1), mRNA.                               |
| scl38548.13.242 0-S | 24.0052 | 3.11 | Lta4h         | NM_008517.1  | Mus musculus leukotriene A4 hydrolase (Lta4h), mRNA.                                                    |
| scl43495.3.1 6-S    | 23.9831 | 1.26 | 2310016C16Rik | NM_027127.1  | Mus musculus RIKEN cDNA 2310016C16 gene (2310016C16Rik), mRNA.                                          |
| scl31426.8.1 131-S  | 23.9746 | 3.46 | 2610041B18Rik | NM_027264.1  | Mus musculus RIKEN cDNA 2610041B18 gene (2610041B18Rik), mRNA.                                          |
| scl23522.8 437-S    | 23.9623 | 1.81 | Fbxo44        | NM_173401.1  |                                                                                                         |
| scl0023802.2 62-S   | 23.9297 | 1.2  | Amfr          | NM_011787.1  | Mus musculus autocrine motility factor receptor (Amfr), mRNA.                                           |
| scl46617.10.1 4-S   | 23.8915 | 1.81 | Il3ra         | NM_008369.1  | Mus musculus interleukin 3 receptor, alpha chain (Il3ra), mRNA.                                         |
| scl000764.1 2-S     | 23.8891 | 1.3  | Sumo1         | NM_009460.1  |                                                                                                         |
| scl00243813.1 281-S | 23.8599 | 1.86 | Leng9         | NM_175529.2  |                                                                                                         |
| scl066335.13 14-S   | 23.8432 | 1.36 | Atp6v1c1      | NM_025494.1  | Mus musculus ATPase, H <sup>+</sup> transporting, V1 subunit C, isoform 1 (Atp6v1c1), mRNA.             |
| scl17140.18.1 11-S  | 23.7962 | 2.88 | Adprt1        | NM_007415.2  | Mus musculus ADP-ribosyltransferase (NAD <sup>+</sup> ; poly (ADP-ribose) polymerase) 1 (Adprt1), mRNA. |
| scl00241308.2 305-S | 23.7876 | 3.79 | Ralgps1       | NM_175211.2  |                                                                                                         |
| scl069601.7 240-S   | 23.7823 | 1.24 | Dab2ip        | NM_001001602 | Mus musculus disabled homolog 2 (Drosophila) interacting protein (Dab2ip), mRNA.                        |
| scl0017993.1 168-S  | 23.7623 | 1.25 | Ndufs4        | NM_010887.1  | Mus musculus NADH dehydrogenase (ubiquinone) Fe-S protein 4 (Ndufs4), mRNA.                             |
| scl0019684.1 297-S  | 23.7239 | 1.9  | Rdx           | NM_009041.1  | Mus musculus radixin (Rdx), mRNA.                                                                       |
| scl0003687.1 76-S   | 23.69   | 3.07 | Trim23        | NM_030731.1  | Mus musculus tripartite motif protein 23 (Trim23), mRNA.                                                |
| scl43593.17 243-S   | 23.6593 | 1.31 | Rad17         | NM_011233.1  | Mus musculus RAD17 homolog (S. pombe) (Rad17), mRNA.                                                    |
| scl54877.7 76-S     | 23.641  | 1.5  | BC023829      | XM_135913.3  | Mus musculus cDNA sequence BC023829 (BC023829), mRNA.                                                   |
| scl068453.4 14-S    | 23.5828 | 1.7  | Gpibbp1       | XM_128001.2  |                                                                                                         |
| scl014569.11 60-S   | 23.5725 | 1.49 | Gdi3          | NM_008112.2  | Mus musculus guanosine diphosphate (GDP) dissociation inhibitor 3 (Gdi3), mRNA.                         |
| scl46501.15.1 0-S   | 23.5578 | 3.26 | Nek4          | NM_011849.1  | Mus musculus NIMA (never in mitosis gene a)-related expressed kinase 4 (Nek4), mRNA.                    |
| scl0002207.1 183-S  | 23.5516 | 1.25 | Dtna          | NM_010087.2  | Mus musculus dystrobrevin alpha (Dtna), transcript variant 2, mRNA.                                     |
| scl02021.14.1 27-S  | 23.5308 | 1.44 | 2310003L22Rik | NM_027093.1  | Mus musculus RIKEN cDNA 2310003L22 gene (2310003L22Rik), mRNA.                                          |
| scl0228714.3 276-S  | 23.5246 | 1.26 | Csrp2bp       | NM_181417.2  | Mus musculus cysteine and glycine-rich protein 2 binding protein (Csrp2bp), mRNA.                       |
| scl1777.9.1 24-S    | 23.5199 | 1.8  | Des           | NM_010043.1  | Mus musculus desmin (Des), mRNA.                                                                        |
| scl40181.5.1 1-S    | 23.5126 | 2.62 | 2210407C18Rik | NM_144544.1  | Mus musculus RIKEN cDNA 2210407C18 gene (2210407C18Rik), mRNA.                                          |
| scl0069821.2 297-S  | 23.5065 | 1.27 | 1810059A23Rik | NM_178051.3  |                                                                                                         |
| scl36820.13 122-S   | 23.4997 | 1.29 | 2010321M09Rik | NM_175153.2  | Mus musculus RIKEN cDNA 2010321M09 gene (2010321M09Rik), mRNA.                                          |
| scl48494.5 274-S    | 23.4785 | 1.44 | Gtf2e1        | NM_028812.1  | Mus musculus general transcription factor II E, polypeptide 1 (alpha subunit) (Gtf2e1), mRNA.           |

|                      |         |      |               |             |                                                                                                                       |
|----------------------|---------|------|---------------|-------------|-----------------------------------------------------------------------------------------------------------------------|
| scl0011797.2 322-S   | 23.4618 | 1.5  | Birc2         | NM_007465.1 | Mus musculus baculoviral IAP repeat-containing 2 (Birc2), mRNA.                                                       |
| scl30008.5 1-S       | 23.4317 | 1.87 | Aqp1          | NM_007472.1 | Mus musculus aquaporin 1 (Aqp1), mRNA.                                                                                |
| scl54141.46.3 34-S   | 23.4155 | 1.47 | Flna          | XM_289920.2 | Mus musculus filamin, alpha (Flna), mRNA.                                                                             |
| scl40580.5.1 111-S   | 23.4115 | 1.26 | 1110020P15Rik | NM_197979.1 | Mus musculus RIKEN cDNA 1110020P15 gene (1110020P15Rik), mRNA.                                                        |
| scl33181.7.1 94-S    | 23.3762 | 3.47 | 1110067L22Rik | NM_026855   | Mus musculus RIKEN cDNA 1110067L22 gene (1110067L22Rik), mRNA.                                                        |
| scl21104.8 445-S     | 23.3523 | 2.24 | 2900073H19Rik | NM_026615.2 | Mus musculus RIKEN cDNA 2900073H19 gene (2900073H19Rik), mRNA.                                                        |
| scl0054683.2 242-S   | 23.3461 | 1.21 | Prdx5         | NM_012021.1 | Mus musculus peroxiredoxin 5 (Prdx5), mRNA.                                                                           |
| scl000341.1 0-S      | 23.2911 | 1.73 | Adprt12       | NM_009632.2 | Mus musculus ADP-ribosyltransferase (NAD <sup>+</sup> ; poly(ADP-ribose) polymerase)-like 2 (Adprt12), mRNA.          |
| scl53034.9 68-S      | 23.2864 | 1.94 | Casp7         | NM_007611.1 | Mus musculus caspase 7 (Casp7), mRNA.                                                                                 |
| scl48651.6 179-S     | 23.2678 | 2.2  | Ehhadh        | NM_023737.2 | Mus musculus enoyl-Coenzyme A, hydratase/3-hydroxyacyl Coenzyme A dehydrogenase (Ehhadh), mRNA.                       |
| scl00235574.1 8-S    | 23.2579 | 2.02 | Atp2c1        | NM_175025.2 | Mus musculus ATPase, Ca <sup>++</sup> -sequestering (Atp2c1), mRNA.                                                   |
| scl0018642.1 78-S    | 23.2483 | 1.25 | Pfkm          | NM_021514.2 | Mus musculus phosphofructokinase, muscle (Pfkm), mRNA.                                                                |
| scl46602.21 8-S      | 23.2365 | 1.41 | Nid2          | NM_008695.1 | Mus musculus nidogen 2 (Nid2), mRNA.                                                                                  |
| scl0050790.1 147-S   | 23.2251 | 1.34 | Acs14         | NM_207625.1 | Mus musculus acyl-CoA synthetase long-chain family member 4 (Acs14), transcript variant 2, mRNA.                      |
| scl20206.6 190-S     | 23.198  | 1.87 | Dstn          | NM_019771.1 | Mus musculus destrin (Dstn), mRNA.                                                                                    |
| scl18043.8 79-S      | 23.1622 | 2.15 | D1Bwg0212e    | NM_028043.2 | Mus musculus DNA segment, Chr 1, Brigham & Womens Genetics 0212 expressed (D1Bwg0212e), mRNA.                         |
| scl06568.3 30-S      | 23.1619 | 3.94 | 2510027J23Rik | NM_025637   | Mus musculus RIKEN cDNA 2510027J23 gene (2510027J23Rik), mRNA.                                                        |
| scl0016564.2 223-S   | 23.1328 | 1.82 | Kif21a        | NM_016705.1 | Mus musculus kinesin family member 21A (Kif21a), mRNA.                                                                |
| scl00107358.2 164-S  | 23.1263 | 2.15 | Smbp          | NM_133552.1 | Mus musculus SM-11044 binding protein (Smbp), mRNA.                                                                   |
| scl017347.2 7-S      | 23.0893 | 1.55 | Mknk2         | NM_021462.2 | Mus musculus MAP kinase-interacting serine/threonine kinase 2 (Mknk2), mRNA.                                          |
| scl51993.3 190-S     | 23.0688 | 1.36 | Eif1a         | NM_010120.3 | Mus musculus eukaryotic translation initiation factor 1A (Eif1a), mRNA.                                               |
| scl31053.2.1 38-S    | 23.0626 | 1.2  | 1810020E01Rik | NM_025460.1 | Mus musculus RIKEN cDNA 1810020E01 gene (1810020E01Rik), mRNA.                                                        |
| scl24032.3.148 1-S   | 23.0619 | 2.04 | 2210012G02Rik | NM_025617.1 | Mus musculus RIKEN cDNA 2210012G02 gene (2210012G02Rik), mRNA.                                                        |
| scl41298.15 342-S    | 23.0487 | 6.02 | Camkk1        | NM_018883.1 | Mus musculus calcium/calmodulin-dependent protein kinase kinase 1, alpha (Camkk1), mRNA.                              |
| scl0233744.9 15-S    | 23.0288 | 2.9  | Spon1         | NM_145584.1 | Mus musculus spondin 1, (f-spondin) extracellular matrix protein (Spon1), mRNA.                                       |
| scl000108.1 22-S     | 22.9977 | 3.81 | Cttn          | NM_007803.1 | Mus musculus cortactin (Cttn), mRNA.                                                                                  |
| scl21963.5 3-S       | 22.9859 | 1.32 | Syt11         | NM_018804.2 | Mus musculus synaptotagmin 11 (Syt11), mRNA.                                                                          |
| scl19239.6 43-S      | 22.9473 | 7.11 | 1110055L24Rik | NM_025422.1 | Mus musculus RIKEN cDNA 1110055L24 gene (1110055L24Rik), mRNA.                                                        |
| scl0067443.1 283-S   | 22.9376 | 1.2  | Map11c3b      | NM_026160   | Mus musculus microtubule-associated protein 1 light chain 3 beta (Map11c3b), mRNA.                                    |
| scl0106583.1 2-S     | 22.8948 | 1.48 | Rbm16         | NM_134123.2 | Mus musculus RNA binding motif protein 16 (Rbm16), mRNA.                                                              |
| scl0013499.1 2-S     | 22.8834 | 1.21 | Drr1          |             |                                                                                                                       |
| scl0140792.13 120-S  | 22.8702 | 1.75 | Colec12       | NM_130449.1 | Mus musculus collectin sub-family member 12 (Colec12), mRNA.                                                          |
| scl39016.40.1 145-S  | 22.8653 | 1.56 | Lama4         | NM_010681.1 | Mus musculus laminin, alpha 4 (Lama4), mRNA.                                                                          |
| scl53447.10 104-S    | 22.8613 | 2.95 | 1810062O14Rik | NM_178650.2 | Mus musculus RIKEN cDNA 1810062O14 gene (1810062O14Rik), mRNA.                                                        |
| scl20092.24 625-S    | 22.8523 | 2.24 | Dnmt3b        | NM_010068.1 | Mus musculus DNA methyltransferase 3B (Dnmt3b), mRNA.                                                                 |
| scl25078.23.1 39-S   | 22.8358 | 1.42 | 4930467B06Rik | NM_029786.1 | Mus musculus RIKEN cDNA 4930467B06 gene (4930467B06Rik), mRNA.                                                        |
| scl054214.31 157-S   | 22.8227 | 6.25 | Golga4        | NM_018748.2 | Mus musculus golgi autoantigen, golgin subfamily a, 4 (Golga4), mRNA.                                                 |
| scl067582.10 107-S   | 22.8177 | 1.53 | Slc25a26      | NM_026255.2 | Mus musculus solute carrier family 25 (mitochondrial carrier; phosphate carrier), member 26 (Slc25a26), mRNA.         |
| scl00053.1 244-S     | 22.8017 | 2.26 | C030034J04Rik | NM_175023.1 | Mus musculus RIKEN cDNA C030034J04 gene (C030034J04Rik), mRNA.                                                        |
| scl45096.3 115-S     | 22.7902 | 1.53 | Copeb         | NM_011803   | Mus musculus core promoter element binding protein (Copeb), mRNA.                                                     |
| scl44989.1 487-S     | 22.7709 | 1.36 | Hist1h1c      | NM_015786   | Mus musculus histone 1, H1c (Hist1h1c), mRNA.                                                                         |
| scl32577.4.1 30-S    | 22.7533 | 1.24 | Mcee          | XM_133510.4 |                                                                                                                       |
| scl0320827.6 21-S    | 22.7418 | 3.08 | C530008M17Rik | XM_287460.2 | Mus musculus RIKEN cDNA C530008M17 gene (C530008M17Rik), mRNA.                                                        |
| scl0002105.1 331-S   | 22.6629 | 3.77 | Kcnn3         | XM_147305.1 | Mus musculus potassium intermediate/small conductance calcium-activated channel, subfamily N, member 3 (Kcnn3), mRNA. |
| scl52427.9.154 111-S | 22.66   | 1.51 | Poll          | NM_020032.1 | Mus musculus polymerase (DNA directed), lambda (Poll), mRNA.                                                          |
| scl35703.13 436-S    | 22.6534 | 1.43 | Map2k1        | NM_008927.1 | Mus musculus mitogen activated protein kinase kinase 1 (Map2k1), mRNA.                                                |
| scl0024135.1 295-S   | 22.6493 | 1.51 | Zfp68         | NM_013844.1 | Mus musculus zinc finger protein 68 (Zfp68), mRNA.                                                                    |
| scl00219150.2 85-S   | 22.6487 | 4.09 | F830020C16Rik | NM_177338.3 | Mus musculus RIKEN cDNA F830020C16 gene (F830020C16Rik), mRNA.                                                        |
| scl41342.11.1 81-S   | 22.6154 | 1.8  | Mgl1          | NM_010796.1 | Mus musculus macrophage galactose N-acetyl-galactosamine specific lectin 1 (Mgl1), mRNA.                              |
| scl06079.4 60-S      | 22.6137 | 1.32 | 0610027O18Rik | NM_025339.2 | Mus musculus RIKEN cDNA 0610027O18 gene (0610027O18Rik), mRNA.                                                        |
| scl072722.1 216-S    | 22.6079 | 1.38 | 2810405J04Rik | NM_133747.1 | Mus musculus RIKEN cDNA 2810405J04 gene (2810405J04Rik), mRNA.                                                        |
| scl28677.12 376-S    | 22.5885 | 1.66 | Zfyve20       | NM_030081.2 | Mus musculus zinc finger, FYVE domain containing 20 (Zfyve20), mRNA.                                                  |
| scl0227800.12 249-S  | 22.5526 | 1.2  | Rabgap1       | NM_146121.1 | Mus musculus RAB GTPase activating protein 1 (Rabgap1), mRNA.                                                         |
| scl20535.2.1 122-S   | 22.5467 | 3.73 | A930018P22Rik | NM_026634.1 | Mus musculus RIKEN cDNA A930018P22 gene (A930018P22Rik), mRNA.                                                        |
| scl44666.7 30-S      | 22.5373 | 1.77 | BC028265      | NM_172392.2 |                                                                                                                       |
| scl0012861.1 173-S   | 22.5327 | 1.21 | Cox6a1        | NM_007748.2 | Mus musculus cytochrome c oxidase, subunit VI a, polypeptide 1 (Cox6a1), mRNA.                                        |



|                     |         |      |               |             |                                                                                                                            |
|---------------------|---------|------|---------------|-------------|----------------------------------------------------------------------------------------------------------------------------|
| scI072043.2 38-S    | 22.5078 | 1.3  | Sulf2         | XM 358343.1 |                                                                                                                            |
| scI28755.11.1 30-S  | 22.5045 | 1.35 | Dusp11        | NM 028099.2 | Mus musculus dual specificity phosphatase 11 (RNA/RNP complex 1-interacting) (Dusp11), mRNA.                               |
| scI48822.17 669-S   | 22.4758 | 2.29 | D230007K08Rik | NM 175547.2 | Mus musculus RIKEN cDNA D230007K08 gene (D230007K08Rik), mRNA.                                                             |
| scI0052712.1 238-S  | 22.4702 | 1.41 | Zfp535        | NM 026107.2 | Mus musculus zinc finger protein 535 (Zfp535), mRNA.                                                                       |
| scI0231871.16 33-S  | 22.4549 | 1.48 | E330036I19Rik | NM 144915.2 | Mus musculus RIKEN cDNA E330036I19 gene (E330036I19Rik), mRNA.                                                             |
| scI0218885.8 148-S  | 22.4451 | 1.22 | BC019806      | NM 145460   | Mus musculus cDNA sequence BC019806 (BC019806), mRNA.                                                                      |
| scI0208117.1 319-S  | 22.4124 | 1.5  | 4632417K02    | NM 177583.2 | Mus musculus hypothetical protein 4632417K02 (4632417K02), mRNA.                                                           |
| scI0065973.1 101-S  | 22.4119 | 1.4  | Asph          | NM 023066.1 | Mus musculus aspartate-beta-hydroxylase (Asph), mRNA.                                                                      |
| scI21992.22 340-S   | 22.4067 | 2.92 | 3110045G13Rik | NM 028460.1 | Mus musculus RIKEN cDNA 3110045G13 gene (3110045G13Rik), mRNA.                                                             |
| scI0067500.2 43-S   | 22.3747 | 1.33 | Ccar1         | NM 026201.1 | Mus musculus cell division cycle and apoptosis regulator 1 (Ccar1), mRNA.                                                  |
| scI24033.7.1 11-S   | 22.3616 | 1.21 | Mrp137        | NM 025500.1 | Mus musculus mitochondrial ribosomal protein L37 (Mrp137), mRNA.                                                           |
| scI24094.1 31-S     | 22.3402 | 1.67 | Jun           | NM 010591.1 | Mus musculus Jun oncogene (Jun), mRNA.                                                                                     |
| scI47786.6.1 30-S   | 22.3398 | 1.6  | 2310010G13Rik | NM 027122.2 | Mus musculus RIKEN cDNA 2310010G13 gene (2310010G13Rik), mRNA.                                                             |
| scI40257.8.9 25-S   | 22.3257 | 1.97 | 0610039K22Rik | NM 025346.1 | Mus musculus RIKEN cDNA 0610039K22 gene (0610039K22Rik), mRNA.                                                             |
| scI00214063.1 272-S | 22.3126 | 1.39 | 4732437J24Rik | NM 172338.1 | Mus musculus RIKEN cDNA 4732437J24 gene (4732437J24Rik), mRNA.                                                             |
| scI26291.11.1 15-S  | 22.312  | 1.26 | Sparcl1       | NM 010097.2 | Mus musculus SPARC-like 1 (mast9, hevln) (Sparcl1), mRNA.                                                                  |
| scI43315.9.1 17-S   | 22.3089 | 2.15 | Sh3yl1        | NM 013709.2 | Mus musculus Sh3 domain YSC-like 1 (Sh3yl1), mRNA.                                                                         |
| scI068642.1 282-S   | 22.2855 | 1.82 | 2810441K11Rik | NM 026798.1 | Mus musculus RIKEN cDNA 2810441K11 gene (2810441K11Rik), mRNA.                                                             |
| scI0054673.1 296-S  | 22.2788 | 1.92 | Sh3glb1       | NM 019464.1 | Mus musculus SH3-domain GRB2-like B1 (endophilin) (Sh3glb1), mRNA.                                                         |
| scI0230088.1 170-S  | 22.2666 | 1.45 | B230312A22Rik | NM 172691.1 | Mus musculus RIKEN cDNA B230312A22 gene (B230312A22Rik), mRNA.                                                             |
| scI54915.11 540-S   | 22.2603 | 1.2  | Htatsf1       | NM 028242.1 |                                                                                                                            |
| scI0018472.1 99-S   | 22.257  | 1.51 | Pafah1b1      | NM 013625.1 | Mus musculus platelet-activating factor acetylhydrolase, isoform 1b, beta1 subunit (Pafah1b1), mRNA.                       |
| scI46811.9.582 26-S | 22.2565 | 1.81 | 3000003F02Rik | NM 172437.1 | Mus musculus RIKEN cDNA 3000003F02 gene (3000003F02Rik), mRNA.                                                             |
| scI23523.7.1 20-S   | 22.2486 | 1.35 | Fbxo6b        | NM 015797.1 | Mus musculus F-box only protein 6b (Fbxo6b), mRNA.                                                                         |
| scI41758.26.1 24-S  | 22.2463 | 1.55 | Pnpt1         | NM 027869.1 | Mus musculus polyribonucleotide nucleotidyltransferase 1 (Pnpt1), mRNA.                                                    |
| scI33577.2 419-S    | 22.2327 | 1.82 | Gadd45gjp1    | NM 183358.2 | Mus musculus growth arrest and DNA-damage-inducible, gamma interacting protein 1 (Gadd45gjp1), mRNA.                       |
| scI0003256.1 3-S    | 22.2302 | 1.34 | Cdk5rap1      | NM 025876.1 | Mus musculus CDK5 regulatory subunit associated protein 1 (Cdk5rap1), mRNA.                                                |
| scI24978.4 154-S    | 22.2294 | 2.06 | Snip1         | NM 175246.2 | Mus musculus Smad nuclear interacting protein 1 (Snip1), mRNA.                                                             |
| scI0020404.1 267-S  | 22.1851 | 2.49 | Sh3gl2        | NM 019535.2 | Mus musculus SH3-domain GRB2-like 2 (Sh3gl2), mRNA.                                                                        |
| scI18127.10.1 92-S  | 22.1781 | 1.86 | Gsta3         | NM 010356.2 | Mus musculus glutathione S-transferase, alpha 3 (Gsta3), mRNA.                                                             |
| scI42964.22.1 29-S  | 22.1746 | 1.42 | Yipm1         | NM 178363.2 |                                                                                                                            |
| scI32676.9.1 1-S    | 22.1716 | 2.3  | Plekha4       | NM 148927.1 | Mus musculus pleckstrin homology domain containing, family A (phosphoinositide binding specific) member 4 (Plekha4), mRNA. |
| scI25806.10.1 16-S  | 22.1667 | 1.28 | Zdhhc4        | NM 028379.1 | Mus musculus zinc finger, DHHC domain containing 4 (Zdhhc4), mRNA.                                                         |
| scI30655.6 70-S     | 22.1601 | 1.24 | Cd2bp2        | NM 027353.2 | Mus musculus CD2 antigen (cytoplasmic tail) binding protein 2 (Cd2bp2), mRNA.                                              |
| scI066935.3 28-S    | 22.1561 | 1.83 | 1700023B02Rik | NM 025854.1 | Mus musculus RIKEN cDNA 1700023B02 gene (1700023B02Rik), mRNA.                                                             |
| scI51588.6 379-S    | 22.1524 | 1.2  | D030070L09Rik | NM 172625.1 | Mus musculus RIKEN cDNA D030070L09 gene (D030070L09Rik), mRNA.                                                             |
| scI36433.10 466-S   | 22.1521 | 2.85 | 2610002I17Rik | XM 135177.4 | Mus musculus RIKEN cDNA 2610002I17 gene (2610002I17Rik), mRNA.                                                             |
| scI39390.10.1 10-S  | 22.1366 | 2.06 | BC029169      | NM 153782.1 | Mus musculus cDNA sequence BC029169 (BC029169), mRNA.                                                                      |
| scI0012398.2 38-S   | 22.1267 | 1.39 | Cbfa2t3h      | NM 009824.1 | Mus musculus core-binding factor, runt domain, alpha subunit 2; translocated to, 3 homolog (human) (Cbfa2t3h), mRNA.       |
| scI22110.22.1 30-S  | 22.1166 | 1.27 | Dhx36         | NM 028136.1 | Mus musculus DEAH (Asp-Glu-Ala-His) box polypeptide 36 (Dhx36), mRNA.                                                      |
| scI0105148.34 198-S | 22.1045 | 4.21 | Iars          | NM 172015.1 | Mus musculus isoleucine-tRNA synthetase (Iars), mRNA.                                                                      |
| scI00026.1 111-S    | 22.0925 | 1.32 | H47           | NM 024439.2 | Mus musculus histocompatibility 47 (H47), mRNA.                                                                            |
| scI070938.1 239-S   | 22.0904 | 2.48 | Vti1a         | NM 183291.1 | Mus musculus vesicle transport through interaction with t-SNAREs homolog 1A (yeast) (Vti1a), mRNA.                         |
| scI0012747.1 67-S   | 22.0809 | 1.56 | Clk1          | NM 009905.1 |                                                                                                                            |
| scI00224143.2 195-S | 22.0733 | 1.42 | 9630046K23Rik | NM 172380.1 | Mus musculus RIKEN cDNA 9630046K23 gene (9630046K23Rik), mRNA.                                                             |
| scI0022195.1 278-S  | 22.064  | 1.32 | Ube2l3        | XM 148568.1 | Mus musculus ubiquitin-conjugating enzyme E2L 3 (Ube2l3), mRNA.                                                            |
| scI0002518.1 2-S    | 22.0623 | 1.63 | Mrp13         | NM 026759.2 | Mus musculus mitochondrial ribosomal protein L13 (Mrp13), mRNA.                                                            |
| scI18545.1 131-S    | 22.0436 | 1.28 | Thbd          | NM 009378.1 | Mus musculus thrombomodulin (Thbd), mRNA.                                                                                  |
| scI0380773.4 2-S    | 22.0426 | 1.2  | 1810035L17Rik | XM 354684.1 |                                                                                                                            |
| scI38302.14.1 13-S  | 21.9998 | 2.53 | Prim1         | NM 008921.1 | Mus musculus DNA primase, p49 subunit (Prim1), mRNA.                                                                       |
| scI29623.5 373-S    | 21.9818 | 1.49 | Vhllh         | NM 009507   | Mus musculus von Hippel-Lindau syndrome homolog (Vhllh), mRNA.                                                             |
| scI34044.10 124-S   | 21.943  | 1.36 | Fbxo25        | NM 025785.1 | Mus musculus F-box only protein 25 (Fbxo25), mRNA.                                                                         |
| scI00234023.2 117-S | 21.9046 | 1.21 | 9430010O03Rik | NM 176849.2 | Mus musculus RIKEN cDNA 9430010O03 gene (9430010O03Rik), mRNA.                                                             |
| scI8888.1.1 269-S   | 21.9024 | 3.04 | Olfir575      | NM 147114.1 | Mus musculus olfactory receptor 575 (Olfir575), mRNA.                                                                      |
| scI18004.30 24-S    | 21.8921 | 1.27 | Tpp2          | NM 009418.1 | Mus musculus tripeptidyl peptidase II (Tpp2), mRNA.                                                                        |
| scI43584.17.1 2-S   | 21.8899 | 1.28 | Slc30a5       | NM 022888.1 | Mus musculus solute carrier family 30 (zinc transporter), member 5 (Slc30a5), mRNA.                                        |

|                     |         |      |               |             |                                                                                                                     |
|---------------------|---------|------|---------------|-------------|---------------------------------------------------------------------------------------------------------------------|
| sc123200.12 402-S   | 21.8768 | 1.8  | 2810046L04Rik | NM_173382   | Mus musculus RIKEN cDNA 2810046L04 gene (2810046L04Rik), mRNA.                                                      |
| sc150598.25 178-S   | 21.8666 | 2.17 | Jmjd2b        | NM_172132.1 | Mus musculus jumonji domain containing 2B (Jmjd2b), mRNA.                                                           |
| sc146229.3 225-S    | 21.8649 | 2.91 | 9430059P22Rik | NM_145463.3 | Mus musculus RIKEN cDNA 9430059P22 gene (9430059P22Rik), mRNA.                                                      |
| sc153403.26.13 76-S | 21.8646 | 1.32 | Bscl2         | NM_008144.3 | Mus musculus Bernardinelli-Seip congenital lipodystrophy 2 homolog (human) (Bscl2), mRNA.                           |
| sc130499.14.1 7-S   | 21.8507 | 1.27 | Rnh1          | NM_145135.2 | Mus musculus ribonuclease/angiogenin inhibitor 1 (Rnh1), mRNA.                                                      |
| sc10066408.1 304-S  | 21.8448 | 1.4  | Aptx          | NM_025545.2 | Mus musculus aprataxin (Aptx), mRNA.                                                                                |
| sc1022793.9 329-S   | 21.8394 | 1.5  | Zyx           | NM_011777.1 | Mus musculus zyxin (Zyx), mRNA.                                                                                     |
| sc1068098.1 43-S    | 21.8359 | 1.23 | Rchy1         | NM_026557.2 | Mus musculus ring finger and CHY zinc finger domain containing 1 (Rchy1), mRNA.                                     |
| sc1072465.7 112-S   | 21.8339 | 1.29 | Zfp131        | NM_028245.1 | Mus musculus zinc finger protein 131 (Zfp131), mRNA.                                                                |
| sc1074104.1 75-S    | 21.8299 | 1.33 | Abcb6         | NM_023732.2 | Mus musculus ATP-binding cassette, sub-family B (MDR/TAP), member 6 (Abcb6), mRNA.                                  |
| sc100210530.2 241-S | 21.8158 | 2.79 | Leprel1       | NM_173379.1 |                                                                                                                     |
| sc10078781.2 278-S  | 21.8066 | 1.7  | Zc3hav1       | NM_028864.1 | Mus musculus zinc finger CCHC type, antiviral 1 (Zc3hav1), mRNA.                                                    |
| sc146056.12.1 60-S  | 21.7928 | 1.59 | Mtrf1         | NM_145960   | Mus musculus mitochondrial translational release factor 1 (Mtrf1), mRNA.                                            |
| sc132924.1 1-S      | 21.7711 | 1.63 | BC025206      | NM_146184.2 |                                                                                                                     |
| sc10101095.9 35-S   | 21.7577 | 1.53 | Zfp282        | NM_146175.2 | Mus musculus zinc finger protein 282 (Zfp282), mRNA.                                                                |
| sc1073170.1 63-S    | 21.7473 | 3.36 | Rwdd3         | NM_028456   | Mus musculus RWD domain containing 3 (Rwdd3), mRNA.                                                                 |
| sc124881.12.1 60-S  | 21.7375 | 1.59 | Nrbf1         | NM_025297.1 | Mus musculus nuclear receptor binding factor 1 (Nrbf1), mRNA.                                                       |
| sc118462.14.1 6-S   | 21.7354 | 2.91 | Ncoa6         | NM_019825.1 | Mus musculus nuclear receptor coactivator 6 (Ncoa6), mRNA.                                                          |
| sc1074610.15 28-S   | 21.7341 | 1.53 | 4833412N02Rik | NM_029020.2 | Mus musculus RIKEN cDNA 4833412N02 gene (4833412N02Rik), mRNA.                                                      |
| sc151769.42.1 6-S   | 21.7091 | 1.55 | Myo5b         | NM_201600.1 | Mus musculus myosin Vb (Myo5b), transcript variant 1, mRNA.                                                         |
| sc155015.6.1 13-S   | 21.6988 | 1.54 | Timp1         | NM_011593   | Mus musculus tissue inhibitor of metalloproteinase 1 (Timp1), mRNA.                                                 |
| sc1022629.4 2-S     | 21.6403 | 1.56 | Ywhah         | NM_011738   | Mus musculus tyrosine 3-monooxygenase/tryptophan 5-monooxygenase activation protein, eta polypeptide (Ywhah), mRNA. |
| sc144090.4 104-S    | 21.5832 | 1.97 | Nrn1          | NM_153529.1 | Mus musculus neuritin 1 (Nrn1), mRNA.                                                                               |
| sc133085.7 52-S     | 21.5609 | 1.95 | Zfp606        | NM_026112.2 | Mus musculus zinc finger protein 606 (Zfp606), mRNA.                                                                |
| sc138673.9 126-S    | 21.5323 | 3.42 | Sf3a2         | NM_013651.3 | Mus musculus splicing factor 3a, subunit 2 (Sf3a2), mRNA.                                                           |
| sc10072020.1 140-S  | 21.522  | 1.87 | 1600021C16Rik | NM_028059.1 | Mus musculus RIKEN cDNA 1600021C16 gene (1600021C16Rik), mRNA.                                                      |
| sc1000592.1 8-S     | 21.4898 | 3.23 | Hp            | NM_017370.1 | Mus musculus haptoglobin (Hp), mRNA.                                                                                |
| sc142736.10.1 35-S  | 21.4892 | 3.83 | Tdrd9         | XM_127120.2 |                                                                                                                     |
| sc148157.24.1 63-S  | 21.4867 | 2.91 | Wdr9          | NM_145125.1 | Mus musculus WD repeat domain 9 (Wdr9), mRNA.                                                                       |
| sc137396.13.1 16-S  | 21.48   | 1.33 | D10Ert610e    | NM_028027.1 | Mus musculus DNA segment, Chr 10, ERATO Doi 610, expressed (D10Ert610e), mRNA.                                      |
| sc10002306.1 28-S   | 21.4572 | 1.73 |               | XM_283061.1 | Mus musculus RIKEN cDNA A630086P08 gene (A630086P08Rik), mRNA.                                                      |
| sc151888.24 434-S   | 21.4429 | 1.3  | Pdgfrb        | NM_008809.1 | Mus musculus platelet derived growth factor receptor, beta polypeptide (Pdgfrb), mRNA.                              |
| sc100217265.2 148-S | 21.4425 | 3.27 | Abca5         | NM_147219.1 | Mus musculus ATP-binding cassette, sub-family A (ABC1), member 5 (Abca5), mRNA.                                     |
| sc120269.13 663-S   | 21.4373 | 1.32 | Hspa12b       | NM_028306.2 | Mus musculus heat shock protein 12B (Hspa12b), mRNA.                                                                |
| GI_6671508-S        | 21.4365 | 1.36 | Actb          | NM_007393.1 | Mus musculus actin, beta, cytoplasmic (Actb), mRNA.                                                                 |
| sc144868.8 25-S     | 21.4344 | 1.59 | Gcnt2         | NM_008105.2 | Mus musculus glucosaminyl (N-acetyl) transferase 2, l-branching enzyme (Gcnt2), transcript variant 3, mRNA.         |
| sc123294.9 553-S    | 21.427  | 1.33 | Zfp639        | NM_144519   |                                                                                                                     |
| sc131056.12.1 57-S  | 21.3968 | 1.25 | Eed           | NM_021876.1 | Mus musculus embryonic ectoderm development (Eed), mRNA.                                                            |
| sc1069938.2 27-S    | 21.3749 | 3.03 | Scrn1         | NM_027268.1 | Mus musculus secernin 1 (Scrn1), mRNA.                                                                              |
| sc1022187.2 0-S     | 21.3694 | 1.46 | Ubb           | NM_011664.1 | Mus musculus ubiquitin B (Ubb), mRNA.                                                                               |
| sc1011737.7 8-S     | 21.3649 | 1.33 | Anp32a        | NM_009672.2 | Mus musculus acidic (leucine-rich) nuclear phosphoprotein 32 family, member A (Anp32a), mRNA.                       |
| sc1016582.1 68-S    | 21.3498 | 1.49 | Kifc3         | NM_010631.1 | Mus musculus kinesin family member C3 (Kifc3), mRNA.                                                                |
| sc150143.3.1 18-S   | 21.3484 | 1.62 | 0610039D01Rik | NM_026307.2 | Mus musculus RIKEN cDNA 0610039D01 gene (0610039D01Rik), mRNA.                                                      |
| sc1020536.5 65-S    | 21.3314 | 3.96 | Slc4a3        | NM_009208.1 | Mus musculus solute carrier family 4 (anion exchanger), member 3 (Slc4a3), mRNA.                                    |
| sc10231510.14 8-S   | 21.3287 | 1.66 | 4933408F15    | NM_172715.1 | Mus musculus hypothetical protein 4933408F15 (4933408F15), mRNA.                                                    |
| sc1022724.2 70-S    | 21.3189 | 4.86 | Zfp67         | NM_009565.1 | Mus musculus zinc finger protein 67 (Zfp67), mRNA.                                                                  |
| sc123635.5.2 0-S    | 21.3176 | 1.34 | Pink1         | NM_026880.1 | Mus musculus PTEN induced putative kinase 1 (Pink1), mRNA.                                                          |
| sc1073247.26 162-S  | 21.315  | 2.95 | 1600027N09Rik | XM_130743.3 | Mus musculus RIKEN cDNA 1600027N09 gene (1600027N09Rik), mRNA.                                                      |
| sc142747.5 440-S    | 21.2896 | 1.54 | 6720458F09Rik | NM_177374.2 | Mus musculus RIKEN cDNA 6720458F09 gene (6720458F09Rik), mRNA.                                                      |
| sc100107029.2 8-S   | 21.2721 | 2.38 | Me2           | NM_145494.1 | Mus musculus malic enzyme 2, NAD(+)-dependent, mitochondrial (Me2), mRNA.                                           |
| sc149488.8 241-S    | 21.2649 | 1.26 | Zfp263        | NM_148924.2 | Mus musculus zinc finger protein 263 (Zfp263), mRNA.                                                                |
| sc152628.17.1 63-S  | 21.2605 | 1.4  | BC018472      | NM_146097.1 | Mus musculus cDNA sequence BC018472 (BC018472), mRNA.                                                               |
| sc1066989.6 1-S     | 21.2558 | 1.52 | 2410004N11Rik | NM_025888.2 | Mus musculus RIKEN cDNA 2410004N11 gene (2410004N11Rik), mRNA.                                                      |
| sc122167.22 124-S   | 21.2461 | 1.2  | Cog6          | NM_026225.1 | Mus musculus component of oligomeric golgi complex 6 (Cog6), mRNA.                                                  |
| sc10217708.6 214-S  | 21.2442 | 4.36 | 5830457H20Rik | NM_173756.2 |                                                                                                                     |
| sc1067604.1 6-S     | 21.2407 | 1.36 | 1110007L15Rik | NM_026269.1 | Mus musculus RIKEN cDNA 1110007L15 gene (1110007L15Rik), mRNA.                                                      |

|                      |         |      |               |             |                                                                                                            |
|----------------------|---------|------|---------------|-------------|------------------------------------------------------------------------------------------------------------|
| scl26137.12_266-S    | 21.2063 | 1.6  | 2400003N08Rik | NM_178622.3 | Mus musculus RIKEN cDNA 2400003N08 gene (2400003N08Rik), mRNA.                                             |
| scl28793.10_326-S    | 21.1988 | 1.35 | Stambp        | NM_024239.1 | Mus musculus Stam binding protein (Stambp), mRNA.                                                          |
| scl050950.2_22-S     | 21.1924 | 1.18 | 5730427N09Rik | NM_021552.1 | Mus musculus RIKEN cDNA 5730427N09 gene (5730427N09Rik), mRNA.                                             |
| scl38879.8_20-S      | 21.1917 | 1.44 | 4632428N05Rik | NM_028732.2 | Mus musculus RIKEN cDNA 4632428N05 gene (4632428N05Rik), mRNA.                                             |
| scl056398.7_324-S    | 21.1687 | 1.18 | 1500003O03Rik | NM_019769.2 | Mus musculus RIKEN cDNA 1500003O03 gene (1500003O03Rik), mRNA.                                             |
| scl27967.7.1_149-S   | 21.1631 | 1.71 | Abhd1         | NM_021304.2 | Mus musculus abhydrolase domain containing 1 (Abhd1), mRNA.                                                |
| scl0117599.1_293-S   | 21.1529 | 1.32 | Helb          | NM_080446.1 | Mus musculus helicase (DNA) B (Helb), mRNA.                                                                |
| scl42451.6.1_16-S    | 21.1427 | 2.8  | Nfkbia        | NM_010907   | Mus musculus nuclear factor of kappa light chain gene enhancer in B-cells inhibitor, alpha (Nfkbia), mRNA. |
| scl53028.7_552-S     | 21.1062 | 1.21 | Trim8         | NM_053100.1 | Mus musculus tripartite motif protein 8 (Trim8), mRNA.                                                     |
| scl41127.15.1_23-S   | 21.0855 | 1.35 | Ddx52         | NM_030096.1 | Mus musculus DEAD (Asp-Glu-Ala-Asp) box polypeptide 52 (Ddx52), mRNA.                                      |
| scl27567.9_262-S     | 21.0491 | 1.36 | Ccng2         | NM_007635.2 | Mus musculus cyclin G2 (Ccng2), mRNA.                                                                      |
| scl52081.14_14-S     | 21.0217 | 1.21 | Ik            | NM_011879.1 | Mus musculus IK cytokine (Ik), mRNA.                                                                       |
| scl016396.2_0-S      | 21.0052 | 2.95 | Itch          | XM_192925.3 | Mus musculus itchy (Itch), mRNA.                                                                           |
| scl24120.2_589-S     | 21.0037 | 1.94 | Cdkn2b        | NM_007670.2 | Mus musculus cyclin-dependent kinase inhibitor 2B (p15, inhibits CDK4) (Cdkn2b), mRNA.                     |
| scl0066853.2_236-S   | 20.9822 | 1.96 | Pnpla2        | NM_025802.1 |                                                                                                            |
| scl0068299.1_136-S   | 20.9632 | 1.35 | 3100002B05Rik | NM_026664.2 | Mus musculus RIKEN cDNA 3100002B05 gene (3100002B05Rik), mRNA.                                             |
| scl066302.10_6-S     | 20.9593 | 2.69 | 2410005O16Rik | NM_025476.3 | Mus musculus RIKEN cDNA 2410005O16 gene (2410005O16Rik), mRNA.                                             |
| scl29590.2_145-S     | 20.9227 | 2.26 | 8430408G22Rik | NM_145980.1 | Mus musculus RIKEN cDNA 8430408G22 gene (8430408G22Rik), mRNA.                                             |
| scl020091.3_53-S     | 20.9185 | 1.21 | Rps3a         | NM_016959.2 | Mus musculus ribosomal protein S3a (Rps3a), mRNA.                                                          |
| scl50284.10.368_11-S | 20.8938 | 3.68 | Dll1          | NM_007865.2 | Mus musculus delta-like 1 (Drosophila) (Dll1), mRNA.                                                       |
| scl49343.16.24_43-S  | 20.8915 | 1.2  | Eif2b5        | NM_172265.1 | Mus musculus eukaryotic translation initiation factor 2B, subunit 5 epsilon (Eif2b5), mRNA.                |
| scl25513.7.1_27-S    | 20.8846 | 1.23 | Creb3         | NM_013497.1 | Mus musculus cAMP responsive element binding protein 3 (Creb3), mRNA.                                      |
| scl21986.3.1_30-S    | 20.8808 | 1.55 | Apoa1bp       | NM_144897   | Mus musculus apolipoprotein A-I binding protein (Apoa1bp), mRNA.                                           |
| scl28959.7_65-S      | 20.8794 | 1.52 | AW146242      | NM_146168.1 | Mus musculus expressed sequence AW146242 (AW146242), mRNA.                                                 |
| scl0020598.1_244-S   | 20.8738 | 1.32 | Smpd2         | NM_009213.1 | Mus musculus sphingomyelin phosphodiesterase 2, neutral (Smpd2), mRNA.                                     |
| scl29983.21.1_98-S   | 20.853  | 7.59 | Abcg2         | NM_011920.1 | Mus musculus ATP-binding cassette, sub-family G (WHITE), member 2 (Abcg2), mRNA.                           |
| scl0003409.1_16-S    | 20.8436 | 3.29 | A330080J22Rik | NM_178667.2 | Mus musculus RIKEN cDNA A330080J22 gene (A330080J22Rik), mRNA.                                             |
| scl46440.4.1_161-S   | 20.8316 | 2.45 | Lrrc21        | NM_146245.1 | Mus musculus leucine rich repeat containing 21 (Lrrc21), mRNA.                                             |
| scl27382.16_83-S     | 20.8274 | 1.34 | 1100001D10Rik | XM_358359.1 | Mus musculus RIKEN cDNA 1100001D10 gene (1100001D10Rik), mRNA.                                             |
| scl071435.1_313-S    | 20.8141 | 1.2  | Arhgap21      | XM_130033.5 |                                                                                                            |
| scl38001.5.1_73-S    | 20.7788 | 1.18 | 1700021F05Rik | NM_026411.1 | Mus musculus RIKEN cDNA 1700021F05 gene (1700021F05Rik), mRNA.                                             |
| scl43318.5_59-S      | 20.7564 | 3.19 | Tmem18        | NM_172049.1 |                                                                                                            |
| scl0002419.1_3-S     | 20.7397 | 1.26 | Trappc6b      | BC031464    | Mus musculus trafficking protein particle complex 6B (Trappc6b), mRNA.                                     |
| scl42858.13_56-S     | 20.7058 | 2.04 | Rin3          | NM_177620.2 | Mus musculus Ras and Rab interactor 3 (Rin3), mRNA.                                                        |
| scl36309.11_147-S    | 20.6717 | 1.27 | Abhd5         | NM_026179.1 | Mus musculus abhydrolase domain containing 5 (Abhd5), mRNA.                                                |
| scl44629.24_90-S     | 20.6702 | 1.31 | Slc12a7       | NM_011390.1 | Mus musculus solute carrier family 12, member 7 (Slc12a7), mRNA.                                           |
| scl020973.4_189-S    | 20.6675 | 1.25 | Syng2         | NM_009304.1 | Mus musculus synaptogyrin 2 (Syng2), mRNA.                                                                 |
| scl0019727.2_202-S   | 20.6577 | 2.66 | Rfxank        | NM_011266.1 | Mus musculus regulatory factor X-associated ankyrin-containing protein (Rfxank), mRNA.                     |
| scl021783.10_20-S    | 20.6403 | 2    | A330080J22Rik | NM_178667.2 |                                                                                                            |
| scl066390.1_295-S    | 20.6056 | 1.19 | 2310042G06Rik | NM_025531.2 | Mus musculus RIKEN cDNA 2310042G06 gene (2310042G06Rik), mRNA.                                             |
| scl25676.27_663-S    | 20.6039 | 1.69 | 1110037F02Rik | XM_283937.2 | Mus musculus RIKEN cDNA 1110037F02 gene (1110037F02Rik), mRNA.                                             |
| scl17135.9_190-S     | 20.6003 | 1.25 | Acbd3         | NM_133225.1 | Mus musculus acyl-Coenzyme A binding domain containing 3 (Acbd3), mRNA.                                    |
| scl0067225.1_69-S    | 20.5927 | 2.04 | 2810441O16Rik | NM_026043.2 | Mus musculus RIKEN cDNA 2810441O16 gene (2810441O16Rik), mRNA.                                             |
| scl0067899.2_259-S   | 20.5898 | 1.41 | 2010110K16Rik | NM_026442.2 | Mus musculus RIKEN cDNA 2010110K16 gene (2010110K16Rik), mRNA.                                             |
| scl31521.10_99-S     | 20.5804 | 4.27 | 1810054G18Rik | NM_029377.1 | Mus musculus RIKEN cDNA 1810054G18 gene (1810054G18Rik), mRNA.                                             |
| scl0271457.7_14-S    | 20.5767 | 4.48 | Rab5a         | NM_025887.2 | Mus musculus RAB5A, member RAS oncogene family (Rab5a), mRNA.                                              |
| scl29313.9.1_4-S     | 20.5763 | 1.36 | Pon3          | NM_173006.1 | Mus musculus paraoxonase 3 (Pon3), mRNA.                                                                   |
| scl46659.10_50-S     | 20.5692 | 2.43 | Zfp385        | NM_013866.1 | Mus musculus zinc finger protein 385 (Zfp385), mRNA.                                                       |
| scl25143.20.1_12-S   | 20.5649 | 1.98 | A830039B04Rik | NM_177045.2 | Mus musculus RIKEN cDNA A830039B04 gene (A830039B04Rik), mRNA.                                             |
| scl49720.1.1_123-S   | 20.5604 | 3.07 | BC016608      | NM_146080.1 | Mus musculus cDNA sequence BC016608 (BC016608), mRNA.                                                      |
| scl30523.17.39_21-S  | 20.5481 | 1.33 | Tubgcp2       | NM_133755.1 | Mus musculus tubulin, gamma complex associated protein 2 (Tubgcp2), mRNA.                                  |
| scl0067398.1_126-S   | 20.5436 | 1.24 | Spr           | NM_026130.1 | Mus musculus signal recognition particle receptor (docking protein) (Spr), mRNA.                           |
| scl0002625.1_41-S    | 20.5175 | 2.05 | 2210012G02Rik | NM_025617.1 | Mus musculus RIKEN cDNA 2210012G02 gene (2210012G02Rik), mRNA.                                             |
| scl0030934.2_247-S   | 20.5135 | 1.75 | Tor1b         | NM_133673.2 | Mus musculus torsin family 1, member B (Tor1b), mRNA.                                                      |
| scl32610.6.1_5-S     | 20.51   | 4.22 | 6430529G09Rik | NM_178706.2 | Mus musculus RIKEN cDNA 6430529G09 gene (6430529G09Rik), mRNA.                                             |
| scl46254.30.2_18-S   | 20.5019 | 2.17 | Adprt1        | XM_283217.2 |                                                                                                            |

|                                                               |                   |                    |               |                  |                                                                                                 |
|---------------------------------------------------------------|-------------------|--------------------|---------------|------------------|-------------------------------------------------------------------------------------------------|
| scl43911.4.1 38-S                                             | 20.4932           | 3.27               | Cxcl14        | NM_019568.1      | Mus musculus chemokine (C-X-C motif) ligand 14 (Cxcl14), mRNA.                                  |
| scl0229543.1 270-S                                            | 20.4658           | 1.42               | C77668        | NM_145540.2      | Mus musculus expressed sequence C77668 (C77668), transcript variant 1, mRNA.                    |
| scl0076080.2 277-S                                            | 20.4605           | 3.35               | 5830472M02Rik | NM_181734.1      | Mus musculus RIKEN cDNA 5830472M02 gene (5830472M02Rik), mRNA.                                  |
| scl066177.1 13-S                                              | 20.4495           | 1.18               | Ubl5          | NM_025401.1      | Mus musculus ubiquitin-like 5 (Ubl5), mRNA.                                                     |
| scl0236732.21 8-S                                             | 20.4228           | 1.5                | Rbm10         | NM_145627        | Mus musculus RNA binding motif protein 10 (Rbm10), mRNA.                                        |
| scl022259.1 112-S                                             | 20.4079           | 1.49               | Nr1h3         | NM_013839.1      | Mus musculus nuclear receptor subfamily 1, group H, member 3 (Nr1h3), mRNA.                     |
| scl26090.11.1 214-S                                           | 20.4033           | 1.64               | 9330129D05Rik | NM_178799.2      | Mus musculus RIKEN cDNA 9330129D05 gene (9330129D05Rik), mRNA.                                  |
| scl46570.12.1 20-S                                            | 20.3854           | 1.24               | Vdac2         | NM_011695.1      | Mus musculus voltage-dependent anion channel 2 (Vdac2), mRNA.                                   |
| scl23736.8.1 149-S                                            | 20.3774           | 1.32               | 1110007F05Rik | XM_355561.1      | Mus musculus RIKEN cDNA 1110007F05 gene (1110007F05Rik), mRNA.                                  |
| scl53358.2.1 26-S                                             | 20.3753           | 2.17               | Ms4a6c        | NM_028595        | Mus musculus membrane-spanning 4-domains, subfamily A, member 6C (Ms4a6c), mRNA.                |
| scl0234267.8 19-S                                             | 20.3753           | 1.46               | Gpm6a         | NM_153581.2      | Mus musculus glycoprotein m6a (Gpm6a), mRNA.                                                    |
| scl00232784.2 34-S                                            | 20.3413           | 1.89               | Zfp212        | NM_145576.1      | Mus musculus Zinc finger protein 212 (Zfp212), mRNA.                                            |
| scl22860.4.705 3-S                                            | 20.3401           | 1.21               | Rgmc          | NM_027126.2      | Mus musculus RGM domain family, member C (Rgmc), mRNA.                                          |
| scl34845.7 126-S                                              | 20.306            | 2.87               | 4933409N07Rik | NM_175162.2      | Mus musculus RIKEN cDNA 4933409N07 gene (4933409N07Rik), mRNA.                                  |
| scl000057.1 28-S                                              | 20.3041           | 10.66              | Nme7          | NM_138314.1      | Mus musculus non-metastatic cells 7, protein expressed in (Nme7), mRNA.                         |
| scl0071911.2 148-S                                            | 20.2991           | 1.49               | Bdh           | NM_175177.3      | Mus musculus 3-hydroxybutyrate dehydrogenase (heart, mitochondrial) (Bdh), mRNA.                |
| scl46562.6.1 9-S                                              | 20.2795           | 3.72               | 1700112E06Rik | XM_127589.2      | Mus musculus RIKEN cDNA 1700112E06 gene (1700112E06Rik), mRNA.                                  |
| scl000091.1 88-S                                              | 20.2709           | 1.23               | Phf10         | NM_024250.3      | Mus musculus RIKEN cDNA 1600012H06 gene (1600012H06Rik), mRNA.                                  |
| scl45062.20 217-S                                             | 20.2526           | 1.3                | Nid1          | NM_010917.1      | Mus musculus nidogen 1 (Nid1), mRNA.                                                            |
| scl000916.1 126-S                                             | 20.2446           | 1.98               | Pou2f1        | NM_011137.1      | Mus musculus POU domain, class 2, transcription factor 1 (Pou2f1), transcript variant 1, mRNA.  |
| scl42857.13.1 22-S                                            | 20.1913           | 1.35               | Golga5        | NM_013747.2      | Mus musculus golgi autoantigen, golgin subfamily a, 5 (Golga5), mRNA.                           |
| scl44991.2.1 21-S                                             | 20.164            | 1.25               | Hist1h2bc     | NM_023422        | Mus musculus histone 1, H2bc (Hist1h2bc), mRNA.                                                 |
| scl0011832.2 50-S                                             | 20.1586           | 4.11               | Aqp7          | NM_007473.3      | Mus musculus aquaporin 7 (Aqp7), mRNA.                                                          |
| scl055980.1 58-S                                              | 20.1428           | 1.44               | Impa1         | NM_018864.3      | Mus musculus inositol (myo)-1(or 4)-monophosphatase 1 (Impa1), mRNA.                            |
| scl18714.45 17-S                                              | 20.1401           | 2.2                | Trpm7         | NM_021450.1      | Mus musculus transient receptor potential cation channel, subfamily M, member 7 (Trpm7), mRNA.  |
| scl36214.3 394-S                                              | 20.1372           | 1.49               | Gbilf         | NM_019683.2      | Mus musculus globin inducing factor, fetal (Gbilf), mRNA.                                       |
| scl52614.18.1 13-S                                            | 20.1325           | 1.51               | D19Bwg1357e   | NM_177474.2      | Mus musculus DNA segment, Chr 19, Brigham & Womens Genetics 1357 expressed (D19Bwg1357e), mRNA. |
| scl48733.40.1 84-S                                            | 20.102            | 1.55               | Myh11         | NM_013607.1      | Mus musculus myosin heavy chain 11, smooth muscle (Myh11), mRNA.                                |
| scl0003482.1 2198-S                                           | 20.0988           | 1.62               | Tbx20         | NM_194263.1      | Mus musculus T-box 20 (Tbx20), transcript variant 2, mRNA.                                      |
| scl36336.8 440-S                                              | 20.0975           | 2.86               | Rpl14         | NM_025974.1      | Mus musculus ribosomal protein L14 (Rpl14), mRNA.                                               |
| scl30534.8 189-S                                              | 20.0823           | 5.58               | Bnip3         | NM_009760.2      | Mus musculus BCL2/adenovirus E1B 19kDa-interacting protein 1, NIP3 (Bnip3), mRNA.               |
| scl0018130.2 77-S                                             | 20.0761           | 1.23               | Ddx26         | NM_008715.1      | Mus musculus DEAD/H (Asp-Glu-Ala-Asp/His) box polypeptide 26 (Ddx26), mRNA.                     |
| scl0237943.1 29-S                                             | 20.0713           | 1.55               | 5430405G24Rik | XM_152907.3      | Mus musculus RIKEN cDNA 5430405G24 gene (5430405G24Rik), mRNA.                                  |
| scl53441.6.1 144-S                                            | 20.0514           | 1.18               | Aip           | NM_016666        | Mus musculus aryl-hydrocarbon receptor-interacting protein (Aip), mRNA.                         |
| scl26742.12.1 68-S                                            | 20.0477           | 1.2                | Eif2b4        | NM_010122.1      | Mus musculus eukaryotic translation initiation factor 2B, subunit 4 delta (Eif2b4), mRNA.       |
| scl41573.28.1 3-S                                             | 20.0443           | 2.24               | B230374F23Rik | NM_177059.2      | Mus musculus RIKEN cDNA B230374F23 gene (B230374F23Rik), mRNA.                                  |
| scl0056738.1 278-S                                            | 20.0432           | 1.65               | Mocs1         | NM_020042.1      | Mus musculus molybdenum cofactor synthesis 1 (Mocs1), transcript variant 1, mRNA.               |
| scl0381626.4 101-S                                            | 20.0424           | 1.34               | 6430512A10Rik | XM_355585.1      |                                                                                                 |
| scl20654.12 238-S                                             | 20.0414           | 1.32               | Mtch2         | NM_019758.2      | Mus musculus mitochondrial carrier homolog 2 (C. elegans) (Mtch2), mRNA.                        |
| scl25518.12 3-S                                               | 20.0338           | 1.49               | Rusc2         | XM_131380.3      |                                                                                                 |
| scl28799.5.1 30-S                                             | 20.0279           | 1.37               | Dguok         | NM_013764.1      | Mus musculus deoxyguanosine kinase (Dguok), mRNA.                                               |
| scl056045.1 19-S                                              | 20.0226           | 2.97               | Samhd1        | NM_018851.2      | Mus musculus SAM domain and HD domain, 1 (Samhd1), mRNA.                                        |
| scl000781.1 68-S                                              | 20.0063           | 1.97               | Kif21b        | NM_019962.2      | Mus musculus kinesin family member 21B (Kif21b), mRNA.                                          |
| scl38403.1.6 135-S                                            | 20.0044           | 2.06               | Lrrc10        | NM_146242.1      | Mus musculus leucine-rich repeat-containing 10 (Lrrc10), mRNA.                                  |
| <b>GENES DOWN-REGULATED BY THE ATHEROGENIC DIET IN HEARTS</b> |                   |                    |               |                  |                                                                                                 |
| <b>TargetID</b>                                               | <b>Diff Score</b> | <b>Fold Change</b> | <b>Symbol</b> | <b>Accession</b> | <b>Definition</b>                                                                               |
| scl49148.7.844 25-S                                           | -231.1983         | -2.83              | Cd80          | NM_009855        | Mus musculus CD80 antigen (Cd80), mRNA.                                                         |
| 18S rRNA_X00686 523-S                                         | -212.7893         | -2.48              | Pigt          | NM_133779.1      | Mus musculus phosphatidylinositol glycan, class T (Pigt), mRNA.                                 |
| scl31105.14.1 82-S                                            | -210.0654         | -2.16              | 9830160G03Rik | NM_172904.1      | Mus musculus RIKEN cDNA 9830160G03 gene (9830160G03Rik), mRNA.                                  |
| scl0056284.1 41-S                                             | -209.6915         | -2.94              | Mrpl19        | NM_026490.1      | Mus musculus mitochondrial ribosomal protein L19 (Mrpl19), mRNA.                                |
| scl00276770.1 2-S                                             | -208.9187         | -3.03              | Eif5a         | NM_181582.2      | Mus musculus eukaryotic translation initiation factor 5A (Eif5a), mRNA.                         |
| scl017527.1 149-S                                             | -204.72           | -2.04              | Mpv17         | NM_008622.1      | Mus musculus Mpv17 transgene, kidney disease mutant (Mpv17), mRNA.                              |
| scl0003580.1 5-S                                              | -204.6237         | -2.69              | Tm4sf8        | NM_019793.2      | Mus musculus transmembrane 4 superfamily member 8 (Tm4sf8), mRNA.                               |
| scl018642.4 28-S                                              | -200.6638         | -4.27              | Pfkm          | NM_021514.2      | Mus musculus phosphofructokinase, muscle (Pfkm), mRNA.                                          |
| scl000319.1 7-S                                               | -192.3135         | -2.26              | Acin1         | NM_019567.1      | Mus musculus apoptotic chromatin condensation inducer 1 (Acin1), mRNA.                          |
| scl020813.1 157-S                                             | -191.9405         | -1.7               | Srp14         | NM_009273.2      | Mus musculus signal recognition particle 14 (Srp14), mRNA.                                      |

|                       |       |           |        |               |             |                                                                                                                           |
|-----------------------|-------|-----------|--------|---------------|-------------|---------------------------------------------------------------------------------------------------------------------------|
| scl014470.4           | 28-S  | -187.262  | -2.01  | Rabac1        | NM_010261.1 | Mus musculus Rab acceptor 1 (prenylated) (Rabac1), mRNA.                                                                  |
| scl0014751.2          | 19-S  | -177.7448 | -3.13  | Gpi1          | NM_008155.1 | Mus musculus glucose phosphate isomerase 1 (Gpi1), mRNA.                                                                  |
| scl22501.2            | 29-S  | -175.3556 | -3.49  |               | NM_053102   | Mus musculus selenoprotein (Sep15), mRNA.                                                                                 |
| scl018643.4           | 21-S  | -175.0392 | -3.89  | Pfn1          | NM_011072.2 | Mus musculus profilin 1 (Pfn1), mRNA.                                                                                     |
| scl019173.2           | 9-S   | -171.7794 | -2.16  | Psmb5         | NM_011186.1 | Mus musculus proteasome (prosome, macropain) subunit, beta type 5 (Psmb5), mRNA.                                          |
| scl000533.1           | 30-S  | -168.095  | -1.93  | Yif1          | NM_026553.2 | Mus musculus Yip1 interacting factor homolog (S. cerevisiae) (Yif1), mRNA.                                                |
| scl34935.10.1         | 29-S  | -166.153  | -2.41  | Dctn6         | NM_011722.1 | Mus musculus dynactin 6 (Dctn6), mRNA.                                                                                    |
| scl26802.3            | 29-S  | -164.6109 | -2.16  | Fastk         | NM_023229.1 | Mus musculus Fas-activated serine/threonine kinase (Fastk), mRNA.                                                         |
| scl066480.2           | 3-S   | -163.0832 | -1.82  | Rpl15         | NM_025586.1 | Mus musculus ribosomal protein L15 (Rpl15), mRNA.                                                                         |
| scl24944.2            | 480-S | -161.9106 | -1.78  | BC003266      | NM_030252.1 | Mus musculus cDNA sequence BC003266 (BC003266), mRNA.                                                                     |
| scl0001433.1          | 54-S  | -161.1855 | -1.99  | Psmc5         | NM_008950.1 | Mus musculus protease (prosome, macropain) 26S subunit, ATPase 5 (Psmc5), mRNA.                                           |
| scl0003742.1          | 4-S   | -160.0903 | -1.72  | Tmem14c       | NM_025387.1 |                                                                                                                           |
| scl0003011.1          | 11-S  | -159.3461 | -2.84  | Agpat2        | NM_026212.1 | Mus musculus 1-acylglycerol-3-phosphate O-acyltransferase 2 (lysophosphatidic acid acyltransferase, beta) (Agpat2), mRNA. |
| scl022147.3           | 29-S  | -159.2025 | -1.95  | Tuba7         | NM_009449.2 | Mus musculus tubulin, alpha 7 (Tuba7), mRNA.                                                                              |
| scl065973.2           | 37-S  | -156.4666 | -2.24  | Asph          | NM_023066.1 | Mus musculus aspartate-beta-hydroxylase (Asph), mRNA.                                                                     |
| scl26557.25           | 455-S | -155.8362 | -3.03  | Recc1         | NM_011258.1 | Mus musculus replication factor C 1 (Recc1), mRNA.                                                                        |
| scl0014751.2          | 296-S | -155.1344 | -1.58  | Gpi1          | NM_008155.1 | Mus musculus glucose phosphate isomerase 1 (Gpi1), mRNA.                                                                  |
| scl26467.3.1          | 2-S   | -154.5631 | -2.18  | Chic2         | NM_028850.1 | Mus musculus cysteine-rich hydrophobic domain 2 (Chic2), mRNA.                                                            |
| scl00018.1            | 3-S   | -152.9511 | -2.11  | Ptpre         | NM_011212.2 | Mus musculus protein tyrosine phosphatase, receptor type, E (Ptpre), mRNA.                                                |
| scl39988.9.1          | 13-S  | -152.8662 | -1.69  | Slc25a11      | NM_024211.2 | Mus musculus solute carrier family 25 (mitochondrial carrier; oxoglutarate carrier), member 11 (Slc25a11), mRNA.          |
| scl40009.3.137        | 12-S  | -151.6259 | -2.24  | Eif5a         |             |                                                                                                                           |
| scl000176.1           | 12-S  | -150.0554 | -1.94  | Psm1          | NM_011965   | Mus musculus proteasome (prosome, macropain) subunit, alpha type 1 (Psm1), mRNA.                                          |
| scl029864.1           | 22-S  | -149.2443 | -1.81  | Rnf11         | NM_013876.2 | Mus musculus ring finger protein 11 (Rnf11), mRNA.                                                                        |
| scl26406.12           | 265-S | -144.0603 | -1.74  | Grsf1         | NM_178700.2 | Mus musculus G-rich RNA sequence binding factor 1 (Grsf1), mRNA.                                                          |
| scl36846.9.2          | 23-S  | -140.3461 | -2.14  | Anp32a        | NM_009672.2 | Mus musculus acidic (leucine-rich) nuclear phosphoprotein 32 family, member A (Anp32a), mRNA.                             |
| scl40177.4            | 172-S | -138.491  | -2.05  | 2410016F01Rik | NM_022423.1 |                                                                                                                           |
| scl27366.3            | 38-S  | -138.1552 | -2.12  | D5Erd33e      | NM_026504.1 | Mus musculus DNA segment, Chr 5, ERATO Doi 33, expressed (D5Erd33e), mRNA.                                                |
| scl30629.5.1          | 26-S  | -137.5654 | -1.99  | Vkorc1        | NM_178600.2 | Mus musculus vitamin K epoxide reductase complex, subunit 1 (Vkorc1), mRNA.                                               |
| scl0240514.1          | 161-S | -137.0703 | -2.3   | A1842788      | NM_198616.1 |                                                                                                                           |
| scl29519.10.9         | 31-S  | -136.7177 | -2.18  | Bcap37        | NM_007531.1 | Mus musculus B-cell receptor-associated protein 37 (Bcap37), mRNA.                                                        |
| scl23678.5.1          | 21-S  | -136.2405 | -1.62  | 3200001F09Rik | NM_027935.1 | Mus musculus RIKEN cDNA 3200001F09 gene (3200001F09Rik), mRNA.                                                            |
| scl24492.20.1         | 105-S | -132.8549 | -18.68 | 1810074P20Rik | NM_026194.2 | Mus musculus RIKEN cDNA 1810074P20 gene (1810074P20Rik), mRNA.                                                            |
| scl17649.8            | 241-S | -132.0722 | -1.89  | 4631423F02Rik | NM_129928.2 | Mus musculus RIKEN cDNA 4631423F02 gene (4631423F02Rik), mRNA.                                                            |
| scl25185.2.323        | 16-S  | -131.5121 | -5.78  | Ppap2b        | NM_080555.1 | Mus musculus phosphatidic acid phosphatase type 2B (Ppap2b), mRNA.                                                        |
| scl011867.9           | 22-S  | -131.4458 | -1.95  | Arpc1b        | NM_023142.1 | Mus musculus actin related protein 2/3 complex, subunit 1B (Arpc1b), mRNA.                                                |
| scl013179.1           | 84-S  | -131.1051 | -3.01  | Dcn           | NM_007833.1 | Mus musculus decorin (Dcn), mRNA.                                                                                         |
| scl054673.4           | 1-S   | -127.9836 | -2.11  | Sh3glb1       | NM_019464.1 | Mus musculus SH3-domain GRB2-like B1 (endophilin) (Sh3glb1), mRNA.                                                        |
| scl42936.6.9          | 32-S  | -127.9241 | -1.64  | Ahsa1         | NM_146036.1 | Mus musculus AHA1, activator of heat shock 90kDa protein ATPase homolog 1 (yeast) (Ahsa1), mRNA.                          |
| scl00029.1            | 14-S  | -127.4967 | -1.65  | 9430029K10Rik | NM_284281.2 | Mus musculus RIKEN cDNA 9430029K10 gene (9430029K10Rik), mRNA.                                                            |
| scl066916.1           | 19-S  | -125.0458 | -1.96  | Ndufb7        | NM_025843.1 | Mus musculus NADH dehydrogenase (ubiquinone) 1 beta subcomplex, 7 (Ndufb7), mRNA.                                         |
| scl47431.10           | 195-S | -124.7647 | -2     | AW549877      | NM_145930   | Mus musculus expressed sequence AW549877 (AW549877), mRNA.                                                                |
| scl068544.3           | 98-S  | -122.3541 | -1.9   | 2310036O22Rik | NM_026760.1 |                                                                                                                           |
| scl0003159.1          | 1-S   | -121.2068 | -3.64  | Gsn           | NM_146120.2 | Mus musculus gelsolin (Gsn), mRNA.                                                                                        |
| scl0017938.1          | 31-S  | -121.0419 | -2.49  | Naca          | NM_013608.2 | Mus musculus nascent polypeptide-associated complex alpha polypeptide (Naca), mRNA.                                       |
| scl0056808.2          | 258-S | -120.442  | -6.86  | Cacna2d2      | NM_020263.2 | Mus musculus calcium channel, voltage-dependent, alpha 2/delta subunit 2 (Cacna2d2), mRNA.                                |
| scl000646.1           | 33-S  | -120.1567 | -1.8   | 2310061C15Rik | NM_026844.2 |                                                                                                                           |
| scl0268449.4          | 2-S   | -119.8986 | -1.51  | Rpl23a        | NM_207523   |                                                                                                                           |
| scl000906.1           | 50-S  | -119.1866 | -2.04  | Acadl         | NM_007381.2 | Mus musculus acetyl-Coenzyme A dehydrogenase, long-chain (Acadl), mRNA.                                                   |
| gi_6671508_ref_NM_007 |       | -115.139  | -1.49  | Actb          | NM_007393.1 | Mus musculus actin, beta, cytoplasmic (Actb), mRNA.                                                                       |
| scl0003351.1          | 17-S  | -114.0424 | -1.65  | Mkks          | NM_021527.1 | Mus musculus McKusick-Kaufman syndrome protein (Mkks), mRNA.                                                              |
| scl36516.9.290        | 30-S  | -113.6603 | -1.91  | Ptk9l         | NM_011876.2 | Mus musculus protein tyrosine kinase 9-like (A6-related protein) (Ptk9l), mRNA.                                           |
| scl0016796.1          | 242-S | -112.9152 | -2.56  | Lasp1         | NM_010688.2 | Mus musculus LIM and SH3 protein 1 (Lasp1), mRNA.                                                                         |
| scl44826.11.1         | 30-S  | -112.8093 | -1.59  | Gmpr          | NM_025508.1 | Mus musculus guanosine monophosphate reductase (Gmpr), mRNA.                                                              |
| scl20055.4.1          | 10-S  | -112.6293 | -1.52  | Dncl2a        | NM_025947.1 | Mus musculus dynein, cytoplasmic, light chain 2A (Dncl2a), mRNA.                                                          |
| scl0002832.1          | 59-S  | -111.6119 | -2.97  | Ptp4a2        | NM_008974.2 | Mus musculus protein tyrosine phosphatase 4a2 (Ptp4a2), mRNA.                                                             |
| scl050795.3           | 8-S   | -109.8487 | -3.91  | Sh3bgr        | NM_147272.1 | Mus musculus SH3-binding domain glutamic acid-rich protein (Sh3bgr), mRNA.                                                |

|                |        |           |        |               |             |                                                                                                                        |
|----------------|--------|-----------|--------|---------------|-------------|------------------------------------------------------------------------------------------------------------------------|
| sc1067942.2    | 64-S   | -109.7261 | -1.47  | Atp5g2        | NM_026468.1 | Mus musculus ATP synthase, H+ transporting, mitochondrial F0 complex, subunit c (subunit 9), isoform 2 (Atp5g2), mRNA. |
| sc132570.6.1   | 25-S   | -109.368  | -1.64  | H47           | NM_024439.2 | Mus musculus histocompatibility 47 (H47), mRNA.                                                                        |
| sc1011951.2    | 99-S   | -108.7208 | -1.81  | Atp5g1        | NM_007506.2 | Mus musculus ATP synthase, H+ transporting, mitochondrial F0 complex, subunit c (subunit 9), isoform 1 (Atp5g1), mRNA. |
| sc129713.3     | 34-S   | -108.5177 | -1.59  | Arl6ip5       | NM_022992.1 | Mus musculus ADP-ribosylation factor-like 6 interacting protein 5 (Arl6ip5), mRNA.                                     |
| sc123453.4     | 99-S   | -108.1653 | -1.5   | 1200015A19Rik | NM_026388.1 | Mus musculus RIKEN cDNA 1200015A19 gene (1200015A19Rik), mRNA.                                                         |
| sc135873.2.103 | 19-S   | -107.6336 | -1.73  | Hspb2         | NM_024441.1 | Mus musculus heat shock protein 2 (Hspb2), mRNA.                                                                       |
| sc135195.14.1  | 5-S    | -106.877  | -2.05  | 1110011D13Rik | NM_029095.1 | Mus musculus RIKEN cDNA 1110011D13 gene (1110011D13Rik), mRNA.                                                         |
| sc1068097.1    | 32-S   | -106.1103 | -3.51  | 6720463E02Rik | NM_026556.2 | Mus musculus RIKEN cDNA 6720463E02 gene (6720463E02Rik), mRNA.                                                         |
| sc10002315.1   | 12-S   | -106.0995 | -10.73 |               | XM_358429.1 | Mus musculus LOC380788 (LOC380788), mRNA.                                                                              |
| sc140850.12.1  | 163-S  | -106.0766 | -1.5   | Nmt1          | NM_008707.2 | Mus musculus N-myristoyltransferase 1 (Nmt1), mRNA.                                                                    |
| sc1000134.1    | 57-S   | -104.6817 | -1.76  | Csrp3         | NM_013808.3 | Mus musculus cysteine and glycine-rich protein 3 (Csrp3), mRNA.                                                        |
| sc100233908.1  | 1058-S | -104.1162 | -3.13  | Fus           | NM_139149.1 | Mus musculus fusion, derived from t(12;16) malignant liposarcoma (human) (Fus), mRNA.                                  |
| sc1000673.1    | 3-S    | -102.9866 | -1.5   | Prdx2         | NM_011563   | Mus musculus peroxiredoxin 2 (Prdx2), mRNA.                                                                            |
| sc119361.2.11  | 20-S   | -101.6333 | -1.67  | Psmb7         | NM_011187.1 | Mus musculus proteasome (prosome, macropain) subunit, beta type 7 (Psmb7), mRNA.                                       |
| sc10068349.1   | 0-S    | -100.548  | -1.49  | Ndufs3        | XM_130347.1 | Mus musculus NADH dehydrogenase (ubiquinone) Fe-S protein 3 (Ndufs3), mRNA.                                            |
| sc1014683.1    | 3-S    | -99.8804  | -1.6   | Gnas          | NM_010309.1 | Mus musculus GNAS (guanine nucleotide binding protein, alpha stimulating) complex locus (Gnas), mRNA.                  |
| sc1056334.4    | 3-S    | -99.711   | -2.19  | 1110032D12Rik | NM_019770   | Mus musculus RIKEN cDNA 1110032D12 gene (1110032D12Rik), mRNA.                                                         |
| sc10170826.1   | 122-S  | -99.4383  | -1.78  | Ppargc1b      | NM_133249   | Mus musculus peroxisome proliferative activated receptor, gamma, coactivator 1 beta (Ppargc1b), mRNA.                  |
| sc121241.7.1   | 29-S   | -98.5845  | -1.75  | Msrb          | NM_029619.2 |                                                                                                                        |
| sc1000532.1    | 17-S   | -96.6803  | -1.6   | Yif1          | NM_026553.2 | Mus musculus Yip1 interacting factor homolog ( <i>S. cerevisiae</i> ) (Yif1), mRNA.                                    |
| sc132119.15.11 | 22-S   | -96.3639  | -1.42  | Uqcrc2        | NM_025899.1 | Mus musculus RIKubiquinol cytochrome c reductase core protein 2 (Uqcrc2), mRNA.                                        |
| sc10018220.1   | 39-S   | -96.082   | -1.98  | Nucb1         | NM_008749.1 |                                                                                                                        |
| sc126807.16.1  | 176-S  | -95.7166  | -3.07  | Kcnh2         | NM_013569.1 | Mus musculus potassium voltage-gated channel, subfamily H (eag-related), member 2 (Kcnh2), mRNA.                       |
| GI_23592945.5  |        | -95.325   | -1.44  | Eef1a1        | XM_134967.2 | Mus musculus eukaryotic translation elongation factor 1 alpha 1 (Eef1a1), mRNA.                                        |
| sc10011733.2   | 121-S  | -95.2653  | -1.84  | Ank1          | NM_031158.1 | Mus musculus ankyrin 1, erythroid (Ank1), mRNA.                                                                        |
| sc1011816.1    | 11-S   | -95.1942  | -1.64  | Apoe          | NM_009696.2 | Mus musculus apolipoprotein E (Apoe), mRNA.                                                                            |
| sc130345.6     | 391-S  | -94.5832  | -1.7   | Kcnd2         | XM_132981.1 | Mus musculus potassium voltage-gated channel, Shal-related family, member 2 (Kcnd2), mRNA.                             |
| sc146304.5.1   | 86-S   | -93.6629  | -1.73  | Mrp152        | NM_026851.1 | Mus musculus mitochondrial ribosomal protein L52 (Mrp152), mRNA.                                                       |
| sc122956.4.1   | 1-S    | -93.5445  | -1.47  | Jtb           | NM_206924.1 | Mus musculus jumping translocation breakpoint (Jtb), mRNA.                                                             |
| sc150699.8.1   | 77-S   | -92.833   | -1.54  | Dscr111       | NM_207649.1 | Mus musculus Down syndrome critical region gene 1-like 1 (Dscr111), transcript variant 2, mRNA.                        |
| sc10013135.2   | 58-S   | -91.9565  | -1.49  | Dad1          | NM_010015.1 | Mus musculus defender against cell death 1 (Dad1), mRNA.                                                               |
| sc10023881.1   | 86-S   | -91.6782  | -1.81  | E430034L04Rik | NM_011816.2 | Mus musculus RIKEN cDNA E430034L04 gene (E430034L04Rik), mRNA.                                                         |
| sc133301.5.15  | 0-S    | -90.0233  | -1.54  | Nudt7         | NM_024437   | Mus musculus nudix (nucleoside diphosphate linked moiety X)-type motif 7 (Nudt7), mRNA.                                |
| sc1070083.1    | 37-S   | -88.7248  | -1.95  | Metrn         | NM_133719   |                                                                                                                        |
| sc138287.7.1   | 16-S   | -88.6384  | -1.69  | Tmem4         | NM_019953.1 | Mus musculus transmembrane protein 4 (Tmem4), mRNA.                                                                    |
| sc10024030.2   | 121-S  | -88.374   | -1.51  | Mirps12       | NM_011885.2 | Mus musculus mitochondrial ribosomal protein S12 (Mirps12), mRNA.                                                      |
| sc1019045.1    | 99-S   | -87.9898  | -1.51  | Ppp1ca        | NM_031868.1 | Mus musculus protein phosphatase 1, catalytic subunit, alpha isoform (Ppp1ca), mRNA.                                   |
| sc10014423.1   | 138-S  | -87.6428  | -1.81  | Galnt1        | NM_013814.2 | Mus musculus UDP-N-acetyl-alpha-D-galactosamine:polypeptide N-acetyl-galactosaminyltransferase 1 (Galnt1), mRNA.       |
| sc122543.4.4   | 13-S   | -87.0786  | -1.89  | Adh5          | NM_007410.2 | Mus musculus alcohol dehydrogenase 5 (class III), chi polypeptide (Adh5), mRNA.                                        |
| sc154976.5.1   | 9-S    | -87.0686  | -1.71  | Mcts1         | NM_026902.1 | Mus musculus malignant T cell amplified sequence 1 (Mcts1), mRNA.                                                      |
| sc1052898.2    | 0-S    | -86.6151  | -1.45  | D11Bwg0434e   | NM_173742.1 | Mus musculus DNA segment, Chr 11, Brigham & Womens Genetics 0434 expressed (D11Bwg0434e), mRNA.                        |
| sc1058194.8    | 43-S   | -85.9173  | -1.76  | Sh3kbp1       | NM_021389.3 | Mus musculus SH3-domain kinase binding protein 1 (Sh3kbp1), mRNA.                                                      |
| sc10029876.1   | 51-S   | -85.8115  | -3.92  | Clic4         | XM_124389.1 | Mus musculus chloride intracellular channel 4 (mitochondrial) (Clic4), mRNA.                                           |
| sc150151.16    | 294-S  | -85.6291  | -1.59  | A1429612      | XM_128606.4 | Mus musculus expressed sequence A1429612 (A1429612), mRNA.                                                             |
| sc10066494.2   | 134-S  | -85.3182  | -1.59  | 2610524G07Rik | NM_025596.4 | Mus musculus RIKEN cDNA 2610524G07 gene (2610524G07Rik), mRNA.                                                         |
| sc10002080.1   | 55-S   | -85.0837  | -2.25  |               | 39340       |                                                                                                                        |
| sc125188.13.1  | 0-S    | -85.0518  | -2.79  | C8b           | NM_133882.1 | Mus musculus complement component 8, beta subunit (C8b), mRNA.                                                         |
| sc10212111.7   | 156-S  | -84.3487  | -1.41  | Inpp5a        | NM_183144.1 | Mus musculus inositol polyphosphate-5-phosphatase A (Inpp5a), mRNA.                                                    |
| sc122902.7.1   | 30-S   | -83.8264  | -1.73  | Mrp19         | NM_030116.1 | Mus musculus mitochondrial ribosomal protein L9 (Mrp19), mRNA.                                                         |
| sc131882.2.42  | 7-S    | -83.8049  | -9.34  | Cd151         | NM_009842.1 | Mus musculus CD151 antigen (Cd151), mRNA.                                                                              |
| sc132994.8.1   | 63-S   | -83.5894  | -1.72  | Ckm           | NM_007710.1 | Mus musculus creatine kinase, muscle (Ckm), mRNA.                                                                      |
| sc124839.6.1   | 26-S   | -83.3923  | -1.6   | Gcipp         | NM_026780.1 | Mus musculus GCIP-interacting protein p29 (Gcipp), mRNA.                                                               |
| sc1020719.1    | 146-S  | -83.069   | -1.44  | Serp1nb6a     | NM_009254.2 | Mus musculus serine (or cysteine) proteinase inhibitor, clade B, member 6a (Serp1nb6a), mRNA.                          |
| sc147204.11.1  | 33-S   | -81.9668  | -1.82  | Ext1          | NM_010162.1 | Mus musculus exostososes (multiple) 1 (Ext1), mRNA.                                                                    |
| sc1012417.4    | 32-S   | -81.67    | -3.94  | Cbx3          | NM_007624   | Mus musculus chromobox homolog 3 ( <i>Drosophila</i> HP1 gamma) (Cbx3), mRNA.                                          |
| sc118213.3.5   | 8-S    | -81.266   | -3.2   | Eef1a2        | NM_007906.2 | Mus musculus eukaryotic translation elongation factor 1 alpha 2 (Eef1a2), mRNA.                                        |

|                 |       |          |        |               |             |                                                                                                                           |
|-----------------|-------|----------|--------|---------------|-------------|---------------------------------------------------------------------------------------------------------------------------|
| scl27115.7.1    | 28-S  | -80.7554 | -1.65  | Ttc11         | NM_025562.1 | Mus musculus tetratricopeptide repeat domain 11 (Ttc11), mRNA.                                                            |
| scl0001439.1    | 101-S | -80.1617 | -2.1   | Ube2g1        | NM_025985.2 | Mus musculus ubiquitin-conjugating enzyme E2G 1 (UBC7 homolog, C. elegans) (Ube2g1), mRNA.                                |
| scl53528.4.1    | 29-S  | -79.8929 | -1.74  | Arl2          | NM_019722.3 | Mus musculus ADP-ribosylation factor-like 2 (Arl2), mRNA.                                                                 |
| scl075265.1     | 98-S  | -79.2991 | -6.11  | Sucla2        | XM_127733.2 |                                                                                                                           |
| scl014980.6     | 15-S  | -79.2496 | -1.52  | H2-L          |             |                                                                                                                           |
| scl55000.11     | 69-S  | -78.8039 | -2.02  | Il13ra1       | NM_133990.3 | Mus musculus interleukin 13 receptor, alpha 1 (Il13ra1), mRNA.                                                            |
| scl0268373.4    | 12-S  | -78.7803 | -1.4   | Ppia          | NM_008907   | Mus musculus peptidylprolyl isomerase A (Ppia), mRNA.                                                                     |
| scl24926.6.1    | 18-S  | -78.0072 | -1.54  | Ak2           | NM_016895.2 | Mus musculus adenylate kinase 2 (Ak2), mRNA.                                                                              |
| scl19818.14.1   | 56-S  | -77.7162 | -5.13  | Th1l          | NM_020580.1 | Mus musculus TH1-like homolog (Drosophila) (Th1l), mRNA.                                                                  |
| scl0230514.5    | 86-S  | -77.4872 | -1.57  | Obrgrp        | NM_175036   | Mus musculus leptin receptor gene-related protein (Obrgrp), mRNA.                                                         |
| scl017313.2     | 5-S   | -77.4799 | -1.38  | Mglap         | NM_008597.2 | Mus musculus matrix gamma-carboxyglutamate (gla) protein (Mglap), mRNA.                                                   |
| scl0076789.1    | 86-S  | -77.337  | -2.36  | 2410129H14Rik | NM_175245.2 | Mus musculus RIKEN cDNA 2410129H14 gene (2410129H14Rik), mRNA.                                                            |
| scl0001621.1    | 13-S  | -76.7492 | -2.15  | Tcp1          | NM_013686   | Mus musculus t-complex protein 1 (Tcp1), mRNA.                                                                            |
| scl056378.6     | 20-S  | -76.731  | -1.41  | Arpc3         | NM_019824.2 | Mus musculus actin related protein 2/3 complex, subunit 3 (Arpc3), mRNA.                                                  |
| scl53656.13     | 28-S  | -76.5463 | -1.37  | Pdha1         | NM_008810.2 | Mus musculus pyruvate dehydrogenase E1 alpha 1 (Pdha1), mRNA.                                                             |
| scl000502.1     | 59-S  | -76.2879 | -1.73  | Prdx5         | NM_012021.1 | Mus musculus peroxiredoxin 5 (Prdx5), mRNA.                                                                               |
| scl0234388.1    | 36-S  | -75.8211 | -1.69  | 1810023B24Rik | XM_134222.1 |                                                                                                                           |
| scl018769.1     | 15-S  | -75.6802 | -1.5   | Pkig          | NM_011106.1 | Mus musculus protein kinase inhibitor, gamma (Pkig), mRNA.                                                                |
| scl056348.1     | 132-S | -75.1873 | -1.95  | Hsd17b12      | NM_019657.2 | Mus musculus hydroxysteroid (17-beta) dehydrogenase 12 (Hsd17b12), mRNA.                                                  |
| scl011461.1     | 64-S  | -74.3439 | -1.65  | Actb          | NM_007393.1 | Mus musculus actin, beta, cytoplasmic (Actb), mRNA.                                                                       |
| scl0017105.1    | 34-S  | -74.3065 | -1.93  | Lyzs          | NM_017372.2 | Mus musculus lysozyme (Lyzs), mRNA.                                                                                       |
| scl15816.17.1   | 28-S  | -74.103  | -1.92  | Capn2         | NM_009794.1 | Mus musculus calpain 2 (Capn2), mRNA.                                                                                     |
| scl0002758.1    | 802-S | -74.0474 | -4.36  | Asph          | NM_133723   | Mus musculus aspartate-beta-hydroxylase (Asph), mRNA.                                                                     |
| scl16816.7.1    | 32-S  | -73.5346 | -1.47  | Fhl2          | NM_010212   | Mus musculus four and a half LIM domains 2 (Fhl2), mRNA.                                                                  |
| scl017826.2     | 113-S | -73.2661 | -1.62  | Mtvr2         | NM_023166   | Mus musculus mammary tumor virus receptor 2 (Mtvr2), mRNA.                                                                |
| scl0002954.1    | 36-S  | -73.0991 | -1.96  | Rbm3          | NM_016809   | Mus musculus RNA binding motif protein 3 (Rbm3), mRNA.                                                                    |
| scl0002680.1    | 6-S   | -72.9921 | -1.48  | Nsep1         | NM_011732.1 | Mus musculus nuclease sensitive element binding protein 1 (Nsep1), mRNA.                                                  |
| scl067681.3     | 8-S   | -72.8315 | -1.57  | Mrp18         | NM_026310.1 | Mus musculus mitochondrial ribosomal protein L18 (Mrp18), mRNA.                                                           |
| scl22769.5.2    | 16-S  | -72.8064 | -2.34  | Rhoc          | NM_007484.1 | Mus musculus ras homolog gene family, member C (Rhoc), mRNA.                                                              |
| scl0014700.2    | 203-S | -72.5874 | -1.79  | Gng10         | NM_025277.1 | Mus musculus guanine nucleotide binding protein (G protein), gamma 10 (Gng10), mRNA.                                      |
| scl49150.5.1    | 75-S  | -72.2887 | -1.46  | Popdc2        | NM_022318.1 | Mus musculus popeye domain containing 2 (Popdc2), mRNA.                                                                   |
| scl53624.9      | 65-S  | -72.1858 | -9.19  | Syap1         | NM_025932.1 | Mus musculus synapse associated protein 1 (Syap1), mRNA.                                                                  |
| scl0019328.2    | 52-S  | -72.1115 | -1.94  | Rab12         | NM_024448.1 | Mus musculus RAB12, member RAS oncogene family (Rab12), mRNA.                                                             |
| scl0056491.1    | 59-S  | -72.0222 | -1.47  | Vapb          | NM_019806.3 | Mus musculus vesicle-associated membrane protein, associated protein B and C (Vapb), mRNA.                                |
| scl40772.15     | 67-S  | -71.4067 | -1.46  | Prkar1a       | NM_021880.1 | Mus musculus protein kinase, cAMP dependent regulatory, type I, alpha (Prkar1a), mRNA.                                    |
| scl33416.4.1    | 0-S   | -70.5976 | -1.7   | Hspc171       | NM_025486.1 |                                                                                                                           |
| scl019988.6     | 33-S  | -70.3694 | -1.36  | Rpl6          | NM_011290   | Mus musculus ribosomal protein L6 (Rpl6), mRNA.                                                                           |
| scl0002841.1    | 13-S  | -70.1321 | -8.06  | 1200015A19Rik | NM_026388.1 | Mus musculus RIKEN cDNA 1200015A19 gene (1200015A19Rik), mRNA.                                                            |
| scl32110.5.1    | 11-S  | -69.1538 | -1.94  | 0610012D09Rik | NM_021554.2 | Mus musculus RIKEN cDNA 0610012D09 gene (0610012D09Rik), mRNA.                                                            |
| scl0002191.1    | 543-S | -69.0286 | -1.38  | Svll          | NM_153153   | Mus musculus supervillin (Svll), mRNA.                                                                                    |
| scl069072.8     | 1-S   | -68.5113 | -1.65  | Ebna1bp2      | NM_026932.2 | Mus musculus EBNA1 binding protein 2 (Ebna1bp2), mRNA.                                                                    |
| scl32129.5.1    | 10-S  | -68.0687 | -2.73  | 8430420C20Rik | NM_145586.1 | Mus musculus RIKEN cDNA 8430420C20 gene (8430420C20Rik), mRNA.                                                            |
| scl19251.13.1   | 62-S  | -67.8924 | -12.12 | 2610014F08Rik | XM_130321.4 | Mus musculus RIKEN cDNA 2610014F08 gene (2610014F08Rik), mRNA.                                                            |
| scl029876.1     | 59-S  | -67.5714 | -1.4   | Clic4         | XM_124389.1 | Mus musculus chloride intracellular channel 4 (mitochondrial) (Clic4), mRNA.                                              |
| scl000923.1     | 16-S  | -67.5563 | -1.7   | Insig2        | NM_178082.2 | Mus musculus insulin induced gene 2 (Insig2), mRNA.                                                                       |
| scl41544.8      | 269-S | -67.4463 | -1.66  | Gpx3          | NM_008161.1 | Mus musculus glutathione peroxidase 3 (Gpx3), mRNA.                                                                       |
| scl0004124.1    | 11-S  | -67.226  | -4.46  | Anapc5        | NM_021505.1 | Mus musculus anaphase-promoting complex subunit 5 (Anapc5), mRNA.                                                         |
| scl34300.16.8   | 59-S  | -66.8909 | -1.47  | Kars          | NM_053092.1 | Mus musculus lysyl-tRNA synthetase (Kars), mRNA.                                                                          |
| scl27066.10     | 346-S | -66.8703 | -1.48  | 1110007L15Rik | NM_026269.1 | Mus musculus RIKEN cDNA 1110007L15 gene (1110007L15Rik), mRNA.                                                            |
| scl017992.3     | 16-S  | -66.798  | -1.34  | Ndufa4        | NM_010886.1 | Mus musculus NADH dehydrogenase (ubiquinone) 1 alpha subcomplex, 4 (Ndufa4), mRNA.                                        |
| scl000657.1     | 20-S  | -66.6849 | -1.71  | Mrops31       | NM_020560.1 | Mus musculus mitochondrial ribosomal protein S31 (Mrops31), mRNA.                                                         |
| scl0234664.3    | 26-S  | -66.6438 | -1.46  | Appbp1        | NM_144931.1 | Mus musculus amyloid beta precursor protein binding protein 1 (Appbp1), mRNA.                                             |
| scl28771.4      | 14-S  | -66.0732 | -1.72  | Spr           | NM_011467.1 | Mus musculus sepiapterin reductase (Spr), mRNA.                                                                           |
| scl0001294.1    | 4-S   | -66.0203 | -1.99  | G6pc3         | NM_175935.2 | Mus musculus glucose 6 phosphatase, catalytic, 3 (G6pc3), mRNA.                                                           |
| scl44884.17.178 | 34-S  | -65.5869 | -5.4   | Riok1         | NM_024242.2 | Mus musculus RIO kinase 1 (yeast) (Riok1), mRNA.                                                                          |
| scl011740.4     | 112-S | -65.4192 | -1.34  | Slc25a5       | NM_007451.2 | Mus musculus solute carrier family 25 (mitochondrial carrier; adenine nucleotide translocator), member 5 (Slc25a5), mRNA. |

|                     |          |       |               |             |                                                                                                                                                                         |
|---------------------|----------|-------|---------------|-------------|-------------------------------------------------------------------------------------------------------------------------------------------------------------------------|
| sci022240.3 34-S    | -65.1238 | -2.06 | Dpysl3        | NM_009468.1 | Mus musculus dihydropyrimidinase-like 3 (Dpysl3), mRNA.                                                                                                                 |
| sci49191.18.1 6-S   | -64.9112 | -2.16 | Sema5b        | XM_147227.1 | Mus musculus sema domain, seven thrombospondin repeats (type 1 and type 1-like), transmembrane domain (TM) and short cytoplasmic domain, (semaphorin 5B (Sema5b), mRNA. |
| sci35271.8.1 43-S   | -64.756  | -8.23 | Cklfsf7       | NM_133978.1 | Mus musculus chemokine-like factor super family 7 (Cklfsf7), mRNA.                                                                                                      |
| sci40859.13.1 14-S  | -63.8883 | -1.4  | Grn           | NM_008175.2 | Mus musculus granulin (Grn), mRNA.                                                                                                                                      |
| sci40144.28.1 2-S   | -63.6716 | -1.79 | Fliih         | NM_022009.1 | Mus musculus flightless I homolog (Drosophila) (Fliih), mRNA.                                                                                                           |
| sci0015275.2 184-S  | -63.2289 | -2.41 | Hk1           | NM_010438.1 | Mus musculus hexokinase 1 (Hk1), mRNA.                                                                                                                                  |
| sci0001745.1 1-S    | -62.9916 | -3.73 | Flot1         | NM_008027.1 | Mus musculus flotillin 1 (Flot1), mRNA.                                                                                                                                 |
| sci0073046.2 136-S  | -62.9458 | -1.46 | 2900070E19Rik | NM_028419.1 | Mus musculus RIKEN cDNA 2900070E19 gene (2900070E19Rik), mRNA.                                                                                                          |
| sci41029.2 494-S    | -62.7939 | -2.01 | Tob1          | NM_009427.1 | Mus musculus transducer of ErbB-2.1 (Tob1), mRNA.                                                                                                                       |
| sci34224.8.1 50-S   | -62.5045 | -1.41 | Cyba          | NM_007806.1 | Mus musculus cytochrome b-245, alpha polypeptide (Cyba), mRNA.                                                                                                          |
| sci29414.11.4 112-S | -62.4456 | -1.43 | Strap         | NM_011499.1 | Mus musculus serine/threonine kinase receptor associated protein (Strap), mRNA.                                                                                         |
| sci0001607.1 37-S   | -62.4294 | -1.52 | 2810410M20Rik | NM_024428   | Mus musculus RIKEN cDNA 2810410M20 gene (2810410M20Rik), mRNA.                                                                                                          |
| sci019223.1 1-S     | -62.3463 | -1.43 | Ptgis         | NM_008968.2 | Mus musculus prostaglandin I2 (prostacyclin) synthase (Ptgis), mRNA.                                                                                                    |
| sci21503.2.1 16-S   | -62.2208 | -1.45 | Hadhsc        | NM_008212.1 | Mus musculus L-3-hydroxyacyl-Coenzyme A dehydrogenase, short chain (Hadhsc), mRNA.                                                                                      |
| sci52675.8.401 6-S  | -62.1572 | -1.54 | Ostf1         | NM_017375.1 | Mus musculus osteoclast stimulating factor 1 (Ostf1), mRNA.                                                                                                             |
| sci012512.6 24-S    | -61.2829 | -1.44 | Cd63          | NM_007653.1 | Mus musculus Cd63 antigen (Cd63), mRNA.                                                                                                                                 |
| sci20327.6 25-S     | -61.1906 | -1.42 | Stard7        | NM_139308.1 | Mus musculus START domain containing 7 (Stard7), mRNA.                                                                                                                  |
| sci28399.6.24 1-S   | -61.0764 | -1.53 | Cd9           | NM_007657.2 | Mus musculus CD9 antigen (Cd9), mRNA.                                                                                                                                   |
| sci00232087.1 95-S  | -60.984  | -2.77 | Mat2a         | NM_145569   | Mus musculus methionine adenosyltransferase II, alpha (Mat2a), mRNA.                                                                                                    |
| sci36904.3.10 19-S  | -60.9475 | -1.32 | Cox5a         | NM_007747   | Mus musculus cytochrome c oxidase, subunit Va (Cox5a), mRNA.                                                                                                            |
| sci0003537.1 10-S   | -60.8858 | -2.5  | Pcolce2       | NM_029620.1 | Mus musculus procollagen C-endopeptidase enhancer 2 (Pcolce2), mRNA.                                                                                                    |
| sci0001450.1 42-S   | -60.7921 | -1.76 | 1700113I22Rik | NM_026865   | Mus musculus RIKEN cDNA 1700113I22 gene (1700113I22Rik), mRNA.                                                                                                          |
| sci19155.19 403-S   | -60.2787 | -1.43 | Slc25a12      | NM_172436.2 | Mus musculus solute carrier family 25 (mitochondrial carrier, Aralar), member 12 (Slc25a12), mRNA.                                                                      |
| sci17636.2.1 21-S   | -60.2765 | -1.91 | 0710001B24Rik | NM_175118   | Mus musculus RIKEN cDNA 0710001B24 gene (0710001B24Rik), mRNA.                                                                                                          |
| sci054616.1 2-S     | -60.044  | -1.63 | Extl3         | NM_018788.2 | Mus musculus exostos (multiple)-like 3 (Extl3), mRNA.                                                                                                                   |
| sci019042.1 95-S    | -60.0315 | -1.86 | Ppm1a         | NM_008910.2 | Mus musculus protein phosphatase 1A, magnesium dependent, alpha isoform (Ppm1a), mRNA.                                                                                  |
| sci0074026.1 154-S  | -60.0088 | -1.48 | 4121402D02Rik | NM_028722.1 | Mus musculus RIKEN cDNA 4121402D02 gene (4121402D02Rik), mRNA.                                                                                                          |
| sci34655.25.1 28-S  | -59.913  | -1.43 | Eps15-rs      | NM_007944.1 | Mus musculus epidermal growth factor receptor pathway substrate 15, related sequence (Eps15-rs), mRNA.                                                                  |
| sci37045.17.1 33-S  | -59.8917 | -1.52 | Usp2          | NM_198091.1 | Mus musculus ubiquitin specific protease 2 (Usp2), transcript variant 2, mRNA.                                                                                          |
| sci0019663.2 128-S  | -59.8699 | -1.47 | Rbpms         | NM_019733.1 | Mus musculus RNA binding protein gene with multiple splicing (Rbpms), mRNA.                                                                                             |
| sci0058239.1 184-S  | -59.79   | -2.61 | Dexi          | NM_021428.3 | Mus musculus dexamethasone-induced transcript (Dexi), mRNA.                                                                                                             |
| sci0002222.1 6-S    | -59.6781 | -1.39 | Lims2         | NM_144862.1 | Mus musculus LIM and senescent cell antigen like domains 2 (Lims2), mRNA.                                                                                               |
| sci0001801.1 3-S    | -59.5225 | -1.37 | Dscr5         | NM_019543.2 | Mus musculus Down syndrome critical region homolog 5 (human) (Dscr5), mRNA.                                                                                             |
| sci0328601.1 103-S  | -59.5225 | -1.5  | Ccnt1         | XM_286697.2 | Mus musculus cyclin T1 (Ccnt1), mRNA.                                                                                                                                   |
| sci0023807.1 130-S  | -59.5194 | -1.42 | Arih2         | NM_011790.2 | Mus musculus ariadne homolog 2 (Drosophila) (Arih2), mRNA.                                                                                                              |
| sci026441.8 13-S    | -59.5017 | -1.43 | Psma4         | NM_011966   | Mus musculus proteasome (prosome, macropain) subunit, alpha type 4 (Psma4), mRNA.                                                                                       |
| sci41225.47 412-S   | -59.3369 | -1.57 | Myo18a        | NM_011586.1 | Mus musculus myosin XVIIIa (Myo18a), mRNA.                                                                                                                              |
| sci45884.3 67-S     | -59.2528 | -2.16 | Lrrc3b        | NM_146052.2 |                                                                                                                                                                         |
| sci0001631.1 196-S  | -59.2396 | -1.92 | Rpo1-1        | NM_009085.1 | Mus musculus RNA polymerase 1-1 (Rpo1-1), mRNA.                                                                                                                         |
| sci0003623.1 49-S   | -59.1614 | -2.95 | Pfkp          | NM_019703.2 | Mus musculus phosphofructokinase, platelet (Pfkp), mRNA.                                                                                                                |
| sci43914.11.4 21-S  | -58.9848 | -2.72 | H2afy         | NM_012015.1 | Mus musculus H2A histone family, member Y (H2afy), mRNA.                                                                                                                |
| sci25288.8 80-S     | -58.9794 | -2.92 | Mtap          | NM_024433.1 | Mus musculus methylthioadenosine phosphorylase (Mtap), mRNA.                                                                                                            |
| sci0053378.2 54-S   | -58.9359 | -2.44 | Sdcbp         | NM_016807.1 | Mus musculus syndecan binding protein (Sdcbp), mRNA.                                                                                                                    |
| sci066589.4 10-S    | -58.4174 | -2.43 | Ube2v1        | NM_023230.1 | Mus musculus ubiquitin-conjugating enzyme E2 variant 1 (Ube2v1), mRNA.                                                                                                  |
| sci012700.3 170-S   | -58.3809 | -1.78 | Cish          | NM_009895.2 | Mus musculus cytokine inducible SH2-containing protein (Cish), mRNA.                                                                                                    |
| sci0098878.2 247-S  | -58.3486 | -1.37 | Ehd4          | NM_133838.2 | Mus musculus EH-domain containing 4 (Ehd4), mRNA.                                                                                                                       |
| sci015040.2 130-S   | -58.345  | -1.56 | H2-T23        | NM_010398   | Mus musculus histocompatibility 2, T region locus 23 (H2-T23), mRNA.                                                                                                    |
| sci0012450.2 17-S   | -58.1918 | -1.42 | Ccng1         | NM_009831.1 | Mus musculus cyclin G1 (Ccng1), mRNA.                                                                                                                                   |
| sci0078920.2 103-S  | -57.9661 | -1.36 | Dist          | NM_030225.3 | Mus musculus dihydroliipoamide S-succinyltransferase (E2 component of 2-oxo-glutarate complex) (Dist), mRNA.                                                            |
| sci020638.2 15-S    | -57.8901 | -1.96 | Snrpb         | NM_009225.1 | Mus musculus small nuclear ribonucleoprotein B (Snrpb), mRNA.                                                                                                           |
| sci0022213.2 69-S   | -57.6849 | -8.11 | Ube2g2        | NM_019803.2 | Mus musculus ubiquitin-conjugating enzyme E2G 2 (Ube2g2), mRNA.                                                                                                         |
| sci0001344.1 14-S   | -57.4981 | -6.63 | 4930579A11Rik | NM_029478.2 | Mus musculus RIKEN cDNA 4930579A11 gene (4930579A11Rik), mRNA.                                                                                                          |
| sci49476.8.9 25-S   | -57.2789 | -1.51 | Hmox2         | NM_010443.1 | Mus musculus heme oxygenase (decycling) 2 (Hmox2), mRNA.                                                                                                                |
| sci54227.4 188-S    | -57.2465 | -1.5  | Tmem32        | NM_146234.2 |                                                                                                                                                                         |
| sci48911.16.3 18-S  | -56.7814 | -2.67 | Usp16         | NM_024258.1 | Mus musculus ubiquitin specific protease 16 (Usp16), mRNA.                                                                                                              |
| sci0002187.1 532-S  | -56.6275 | -1.41 | Rab18         | NM_181070.2 | Mus musculus RAB18, member RAS oncogene family (Rab18), mRNA.                                                                                                           |



|                |        |          |       |               |             |                                                                                                                                |
|----------------|--------|----------|-------|---------------|-------------|--------------------------------------------------------------------------------------------------------------------------------|
| scI0245688.1   | 74-S   | -56.5537 | -9.65 | Rbbp7         | NM_009031.2 | Mus musculus retinoblastoma binding protein 7 (Rbbp7), mRNA.                                                                   |
| gi_6679936_ref | NM_008 | -56.5098 | -1.52 |               |             |                                                                                                                                |
| scI0001137.1   | 14-S   | -56.4962 | -1.8  | Mips25        | NM_025578.2 | Mus musculus mitochondrial ribosomal protein S25 (Mips25), mRNA.                                                               |
| scI51225.7.1   | 1-S    | -56.0459 | -2.26 | 1110032A13Rik | NM_199197.1 | Mus musculus RIKEN cDNA 1110032A13 gene (1110032A13Rik), mRNA.                                                                 |
| scI15941.6.1   | 27-S   | -56.0314 | -1.6  | Ndufs2        | NM_153064.3 | Mus musculus NADH dehydrogenase (ubiquinone) Fe-S protein 2 (Ndufs2), mRNA.                                                    |
| scI50948.6.850 | 26-S   | -55.9666 | -1.39 | Atp6v0e       | NM_025272.1 | Mus musculus ATPase, H+ transporting, V0 subunit (Atp6v0e), mRNA.                                                              |
| scI24605.2.1   | 63-S   | -55.8384 | -1.38 | 0610033H09Rik | NM_025338.1 | Mus musculus RIKEN cDNA 0610033H09 gene (0610033H09Rik), mRNA.                                                                 |
| scI000333.1    | 26-S   | -55.1878 | -7.26 | Tgfb114       | NM_009366.1 | Mus musculus transforming growth factor beta 1 induced transcript 4 (Tgfb114), mRNA.                                           |
| scI00211378.1  | 156-S  | -55.015  | -9.86 | 6720489N17Rik | NM_142448   | Mus musculus RIKEN cDNA 6720489N17 gene (6720489N17Rik), mRNA.                                                                 |
| scI000245.1    | 108-S  | -55.0086 | -2.46 | Irf3          | NM_016849.2 | Mus musculus interferon regulatory factor 3 (Irf3), mRNA.                                                                      |
| scI0319184.1   | 311-S  | -54.7894 | -1.58 | Hist1h2bk     | NM_175665.1 | Mus musculus histone 1, H2bk (Hist1h2bk), mRNA.                                                                                |
| scI059042.1    | 5-S    | -54.5164 | -1.61 | Cope          | NM_021538.1 | Mus musculus coatomer protein complex, subunit epsilon (Cope), mRNA.                                                           |
| scI057785.2    | 9-S    | -54.511  | -1.57 | Rangnrf       | NM_021329.1 | Mus musculus RAN guanine nucleotide release factor (Rangnrf), mRNA.                                                            |
| scI0001591.1   | 7-S    | -54.3187 | -1.62 | Hnrph1        | NM_021510.1 | Mus musculus heterogeneous nuclear ribonucleoprotein H1 (Hnrph1), mRNA.                                                        |
| scI18232.3.7   | 30-S   | -54.2221 | -1.33 | PsmA7         | NM_011969.1 | Mus musculus proteasome (prosome, macropain) subunit, alpha type 7 (PsmA7), mRNA.                                              |
| scI40837.7     | 339-S  | -54.092  | -1.39 | Arl2          | NM_007477.2 | Mus musculus ADP-ribosylation factor 2 (Arl2), mRNA.                                                                           |
| scI46751.13    | 99-S   | -53.8089 | -1.38 | Prkag1        | NM_016781   | Mus musculus protein kinase, AMP-activated, gamma 1 non-catalytic subunit (Prkag1), mRNA.                                      |
| scI00071.1     | 7-S    | -53.7464 | -1.48 | PsmD13        | NM_011875   | Mus musculus proteasome (prosome, macropain) 26S subunit, non-ATPase, 13 (PsmD13), mRNA.                                       |
| scI39081.11    | 80-S   | -53.7194 | -1.5  | Stx7          | NM_016797.2 | Mus musculus syntaxin 7 (Stx7), mRNA.                                                                                          |
| scI0056307.2   | 142-S  | -53.4806 | -1.41 | Metap2        | NM_019648.2 | Mus musculus methionine aminopeptidase 2 (Metap2), mRNA.                                                                       |
| scI18853.7.1   | 146-S  | -53.2249 | -1.38 | Actc1         | NM_009608.1 | Mus musculus actin, alpha, cardiac (Actc1), mRNA.                                                                              |
| scI53350.20    | 138-S  | -53.1554 | -2.4  | AV312086      | NM_172635.1 | Mus musculus expressed sequence AV312086 (AV312086), mRNA.                                                                     |
| scI46489.21.1  | 17-S   | -53.1278 | -1.76 | Capn7         | NM_009796.1 | Mus musculus calpain 7 (Capn7), mRNA.                                                                                          |
| scI34581.9.1   | 48-S   | -53.0869 | -1.32 | Gpsn2         | NM_134118.1 | Mus musculus glycoprotein, synaptic 2 (Gpsn2), mRNA.                                                                           |
| scI0215494.1   | 125-S  | -52.6969 | -1.64 | C85492        | NM_153540.2 | Mus musculus expressed sequence C85492 (C85492), mRNA.                                                                         |
| scI52314.6.1   | 5-S    | -52.6631 | -1.31 | Prdx3         | NM_007452.1 | Mus musculus peroxiredoxin 3 (Prdx3), mRNA.                                                                                    |
| scI0068395.1   | 77-S   | -52.6163 | -2.98 | 0610037M15Rik |             |                                                                                                                                |
| scI0004061.1   | 14-S   | -52.5791 | -1.98 | Mpv17         | NM_008622.1 | Mus musculus Mpv17 transgene, kidney disease mutant (Mpv17), mRNA.                                                             |
| scI39607.11    | 182-S  | -52.5736 | -2.29 | Smrce1        | NM_020618.3 | Mus musculus SWI/SNF related, matrix associated, actin dependent regulator of chromatin, subfamily e, member 1 (Smrce1), mRNA. |
| scI0012443.2   | 42-S   | -52.5056 | -2.61 | Cnd1          | NM_007631.1 | Mus musculus cyclin D1 (Cnd1), mRNA.                                                                                           |
| scI40889.7.141 | 9-S    | -52.4878 | -1.4  | D11Wsu68e     | NM_026776.3 | Mus musculus DNA segment, Chr 11, Wayne State University 68, expressed (D11Wsu68e), mRNA.                                      |
| scI0016195.2   | 10-S   | -52.4664 | -3.82 | Il6st         | NM_010560.2 | Mus musculus interleukin 6 signal transducer (Il6st), mRNA.                                                                    |
| scI38444.3.1   | 70-S   | -52.371  | -1.89 | Phlda1        | NM_009344.1 | Mus musculus pleckstrin homology-like domain, family A, member 1 (Phlda1), mRNA.                                               |
| scI0003838.1   | 10-S   | -52.3352 | -1.85 | Pcmt1         | NM_008786.1 | Mus musculus protein-L-isoaspartate (D-aspartate) O-methyltransferase 1 (Pcmt1), mRNA.                                         |
| scI36121.3     | 28-S   | -52.3165 | -1.6  | 1110011K10Rik | NM_170777.3 | Mus musculus RIKEN cDNA 1110011K10 gene (1110011K10Rik), mRNA.                                                                 |
| scI0004181.1   | 42-S   | -52.1847 | -1.56 | Vps29         | NM_019780.1 | Mus musculus vacuolar protein sorting 29 (S. pombe) (Vps29), mRNA.                                                             |
| scI00100273.2  | 58-S   | -52.1464 | -1.31 | Osblp9        | NM_133885.1 | Mus musculus oxysterol binding protein-like 9 (Osblp9), mRNA.                                                                  |
| scI066108.3    | 20-S   | -52.0677 | -1.42 | Ndufa9        | NM_025358.1 | Mus musculus NADH dehydrogenase (ubiquinone) 1 alpha subcomplex, 9 (Ndufa9), mRNA.                                             |
| scI0192292.18  | 41-S   | -52.04   | -2.53 | Nrbp          | NM_147201.1 | Mus musculus nuclear receptor binding protein (Nrbp), mRNA.                                                                    |
| scI067959.1    | 232-S  | -51.8701 | -1.33 | 2410104I19Rik | NM_133691.1 | Mus musculus RIKEN cDNA 2410104I19 gene (2410104I19Rik), mRNA.                                                                 |
| scI28784.6     | 160-S  | -51.7306 | -1.33 | Tex261        | NM_009357.1 | Mus musculus testis expressed gene 261 (Tex261), mRNA.                                                                         |
| scI34280.9.1   | 28-S   | -51.6307 | -1.48 | 2310061C15Rik | NM_026844.2 |                                                                                                                                |
| scI0004033.1   | 10-S   | -51.4937 | -1.63 | Arcp1a        | NM_019767.1 | Mus musculus actin related protein 2/3 complex, subunit 1A (Arcp1a), mRNA.                                                     |
| scI071452.5    | 105-S  | -51.3615 | -1.31 | 5530600A18Rik | NM_027799.1 | Mus musculus RIKEN cDNA 5530600A18 gene (5530600A18Rik), mRNA.                                                                 |
| scI40361.13.1  | 2-S    | -50.9818 | -1.79 | Rars          | NM_025936.1 | Mus musculus arginyl-tRNA synthetase (Rars), mRNA.                                                                             |
| scI0073834.1   | 147-S  | -50.8948 | -1.69 | Atp6v1d       | NM_023721.1 | Mus musculus ATPase, H+ transporting, V1 subunit D (Atp6v1d), mRNA.                                                            |
| scI024075.4    | 0-S    | -50.8492 | -1.4  | Taf10         | NM_020024.3 | Mus musculus TAF10 RNA polymerase II, TATA box binding protein (TBP)-associated factor (Taf10), mRNA.                          |
| scI0272396.21  | 80-S   | -50.7526 | -2.09 | A530046H20Rik | NM_172310.1 | Mus musculus RIKEN cDNA A530046H20 gene (A530046H20Rik), mRNA.                                                                 |
| scI000534.1    | 21-S   | -50.6741 | -1.5  | Ppp1ca        | NM_031868.1 | Mus musculus protein phosphatase 1, catalytic subunit, alpha isoform (Ppp1ca), mRNA.                                           |
| scI0001044.1   | 79-S   | -50.385  | -1.72 | Arl6ip5       | NM_022992.1 | Mus musculus ADP-ribosylation factor-like 6 interacting protein 5 (Arl6ip5), mRNA.                                             |
| scI0059013.2   | 121-S  | -50.3736 | -3.07 | Hnrph1        | NM_021510.1 | Mus musculus heterogeneous nuclear ribonucleoprotein H1 (Hnrph1), mRNA.                                                        |
| scI017938.7    | 45-S   | -50.1689 | -1.48 | Naca          | NM_013608.2 | Mus musculus nascent polypeptide-associated complex alpha polypeptide (Naca), mRNA.                                            |
| scI51485.9     | 146-S  | -50.0442 | -1.48 | Fgf1          | NM_010197.2 | Mus musculus fibroblast growth factor 1 (Fgf1), mRNA.                                                                          |
| scI00114663.2  | 25-S   | -50.0374 | -7.54 | Impa2         | NM_053261.1 | Mus musculus inositol (myo)-1(or 4)-monophosphatase 2 (Impa2), mRNA.                                                           |
| scI019921.5    | 131-S  | -49.9083 | -1.51 | Rpl19         | NM_009078   | Mus musculus ribosomal protein L19 (Rpl19), mRNA.                                                                              |
| scI054170.29   | 181-S  | -49.8139 | -1.35 | Rragc         | NM_017475   | Mus musculus Ras-related GTP binding C (Rragc), mRNA.                                                                          |

|                      |          |       |               |             |                                                                                                    |
|----------------------|----------|-------|---------------|-------------|----------------------------------------------------------------------------------------------------|
| scl0003291.1 0-S     | -49.6173 | -1.57 | Arfrp1        | NM_029702.2 | Mus musculus ADP-ribosylation factor related protein 1 (Arfrp1), mRNA.                             |
| scl36048.5 11-S      | -49.613  | -2.18 | BC024806      | NM_172291.1 | Mus musculus cDNA sequence BC024806 (BC024806), mRNA.                                              |
| scl0003638.1 65-S    | -49.2536 | -1.48 | 2310016C16Rik | NM_027127.1 | Mus musculus RIKEN cDNA 2310016C16 gene (2310016C16Rik), mRNA.                                     |
| scl32057.1.564 6-S   | -49.2458 | -1.5  | 1110025L05Rik | NM_175103.2 | Mus musculus RIKEN cDNA 1110025L05 gene (1110025L05Rik), mRNA.                                     |
| scl35242.18 241-S    | -49.2385 | -1.63 | Rbms3         | NM_178660.2 |                                                                                                    |
| scl066475.2 30-S     | -49.238  | -1.5  | Rps23         | NM_024175   | Mus musculus ribosomal protein S23 (Rps23), mRNA.                                                  |
| scl52799.1 8-S       | -49.0462 | -1.8  | Doc2g         | NM_021791.2 | Mus musculus double C2, gamma (Doc2g), mRNA.                                                       |
| scl0019171.2 204-S   | -48.8397 | -1.54 | Psmb10        | NM_013640.1 | Mus musculus proteasome (prosome, macropain) subunit, beta type 10 (Psmb10), mRNA.                 |
| scl30230.21.1 91-S   | -48.4274 | -2.07 | Sec8l1        | NM_009148.1 | Mus musculus SEC8-like 1 (S. cerevisiae) (Sec8l1), mRNA.                                           |
| scl000639.1 71-S     | -48.3555 | -2.17 | 1110017C15Rik | NM_025391.1 | Mus musculus RIKEN cDNA 1110017C15 gene (1110017C15Rik), mRNA.                                     |
| scl0002710.1 8-S     | -48.3448 | -9.37 | Mfn2          | NM_133201.1 | Mus musculus mitofusin 2 (Mfn2), mRNA.                                                             |
| scl016909.6 211-S    | -48.2955 | -1.56 | Lmo2          | NM_008505.3 | Mus musculus LIM domain only 2 (Lmo2), mRNA.                                                       |
| scl0229279.5 20-S    | -48.2557 | -2.85 | 2610510D13Rik | NM_146130   |                                                                                                    |
| scl32819.7.1 18-S    | -48.1846 | -6.52 | AI839550      | NM_198027.2 | Mus musculus expressed sequence AI839550 (AI839550), mRNA.                                         |
| scl46932.19 335-S    | -48.084  | -1.42 | Rangap1       | NM_011241   | Mus musculus RAN GTPase activating protein 1 (Rangap1), mRNA.                                      |
| scl30702.10.1 59-S   | -48.052  | -1.44 | 2510027N19Rik | NM_026330.2 | Mus musculus RIKEN cDNA 2510027N19 gene (2510027N19Rik), mRNA.                                     |
| scl016828.6 330-S    | -47.6926 | -1.65 | Ldh1          | NM_010699.1 | Mus musculus lactate dehydrogenase 1, A chain (Ldh1), mRNA.                                        |
| scl072139.1 117-S    | -47.5263 | -3.79 | 2610044O15Rik | NM_153780.1 | Mus musculus RIKEN cDNA 2610044O15 gene (2610044O15Rik), mRNA.                                     |
| scl51719.2 118-S     | -47.4774 | -1.5  | Zadh2         | NM_146090.2 |                                                                                                    |
| scl15964.10 1-S      | -47.3423 | -1.42 | Hsd17b7       | NM_010476.2 | Mus musculus hydroxysteroid (17-beta) dehydrogenase 7 (Hsd17b7), mRNA.                             |
| scl0002112.1 25-S    | -47.251  | -1.62 | 1110001A05Rik | NM_019809   | Mus musculus RIKEN cDNA 1110001A05 gene (1110001A05Rik), mRNA.                                     |
| scl017762.10 59-S    | -47.1859 | -1.61 | Mapt          | NM_010838.2 | Mus musculus microtubule-associated protein tau (Mapt), mRNA.                                      |
| scl0002467.1 77-S    | -47.0292 | -1.48 | Bzrp          | NM_009775.2 | Mus musculus benzodiazepine receptor, peripheral (Bzrp), mRNA.                                     |
| scl37659.18.259 11-S | -46.8877 | -1.28 | Tra1          | NM_011631.1 | Mus musculus tumor rejection antigen gp96 (Tra1), mRNA.                                            |
| scl020655.4 35-S     | -46.6165 | -1.3  | Sod1          | NM_011434.1 | Mus musculus superoxide dismutase 1, soluble (Sod1), mRNA.                                         |
| scl0218490.3 0-S     | -46.6021 | -1.35 | Btf3          | NM_145455.1 | Mus musculus basic transcription factor 3 (Btf3), mRNA.                                            |
| scl019942.4 1-S      | -46.5943 | -1.33 | Rpl27         | NM_011289   | Mus musculus ribosomal protein L27 (Rpl27), mRNA.                                                  |
| scl0001335.1 10-S    | -46.5879 | -1.51 | BC005682      | NM_033562.2 | Mus musculus cDNA sequence BC005682 (BC005682), mRNA.                                              |
| scl27180.9.1 11-S    | -46.5628 | -1.54 | Gbas          | NM_008095.1 | Mus musculus glioblastoma amplified sequence (Gbas), mRNA.                                         |
| scl0019056.2 142-S   | -46.5578 | -1.3  | Ppp3cb        | NM_008914.1 | Mus musculus protein phosphatase 3, catalytic subunit, beta isoform (Ppp3cb), mRNA.                |
| scl0012793.2 38-S    | -46.5169 | -1.42 | Cnih          | NM_009919.1 | Mus musculus cornichon homolog (Drosophila) (Cnih), mRNA.                                          |
| scl39231.4 382-S     | -46.3833 | -1.31 | BC003940      | XM_203523.2 | Mus musculus cDNA sequence BC003940 (BC003940), mRNA.                                              |
| scl36684.10 99-S     | -45.9181 | -1.44 | Elov5         | NM_134255.2 | Mus musculus ELOVL family member 5, elongation of long chain fatty acids (yeast) (Elov5), mRNA.    |
| scl36793.6.1 16-S    | -45.6704 | -1.47 | Ppib          | NM_011149.1 | Mus musculus peptidylprolyl isomerase B (Ppib), mRNA.                                              |
| scl21088.14 336-S    | -45.6031 | -1.68 | Ppp2r4        | NM_138748.2 | Mus musculus protein phosphatase 2A, regulatory subunit B (PR 53) (Ppp2r4), mRNA.                  |
| scl0018590.2 128-S   | -45.593  | -1.62 | Pdgfa         | NM_008808.2 | Mus musculus platelet derived growth factor, alpha (Pdgfa), mRNA.                                  |
| scl33257.7.1 7-S     | -45.562  | -2.55 | Wfdc1         | NM_023395.1 | Mus musculus WAP four-disulfide core domain 1 (Wfdc1), mRNA.                                       |
| scl45839.23 390-S    | -45.5368 | -1.61 | Camk2g        | NM_178597.2 | Mus musculus calcium/calmodulin -dependent protein kinase II gamma (Camk2g), mRNA.                 |
| scl00015.1 21-S      | -45.4878 | -1.28 | Rabac1        | NM_010261.1 | Mus musculus Rab acceptor 1 (prenylated) (Rabac1), mRNA.                                           |
| scl053607.7 2-S      | -45.4437 | -2.49 | Snrpa         | NM_015782.2 | Mus musculus small nuclear ribonucleoprotein polypeptide A (Snrpa), mRNA.                          |
| scl37745.17 21-S     | -45.3859 | -1.48 | Thrap5        | NM_198107.1 | Mus musculus thyroid hormone receptor associated protein 5 (Thrap5), mRNA.                         |
| scl020810.7 29-S     | -45.0393 | -4.44 | Srm           | NM_009272.2 | Mus musculus spermidine synthase (Srm), mRNA.                                                      |
| scl0057296.1 256-S   | -44.9858 | -1.54 | Psm8          | NM_026545.1 | Mus musculus proteasome (prosome, macropain) 26S subunit, non-ATPase. 8 (Psm8), mRNA.              |
| scl000386.1 25-S     | -44.6064 | -3.01 | 1110008L20Rik | NM_028643.1 | Mus musculus RIKEN cDNA 1110008L20 gene (1110008L20Rik), mRNA.                                     |
| scl020280.7 0-S      | -44.5067 | -2.05 | Scp2          | NM_011327.1 | Mus musculus sterol carrier protein 2, liver (Scp2), mRNA.                                         |
| scl45706.11 2-S      | -44.4254 | -1.32 | Ghitm         | NM_078478.1 | Mus musculus growth hormone inducible transmembrane protein (Ghitm), mRNA.                         |
| scl31031.8.1 28-S    | -44.3319 | -1.46 | 1810020D17Rik | NM_183251.2 | Mus musculus RIKEN cDNA 1810020D17 gene (1810020D17Rik), mRNA.                                     |
| scl094091.6 116-S    | -44.3067 | -1.94 | Trim11        | NM_053168.1 | Mus musculus tripartite motif protein 11 (Trim11), mRNA.                                           |
| scl0053379.2 22-S    | -44.2233 | -2.02 | Hnrpa2b1      | NM_182650.2 | Mus musculus heterogeneous nuclear ribonucleoprotein A2/B1 (Hnrpa2b1), transcript variant 2, mRNA. |
| scl23697.3.1 58-S    | -44.2005 | -2.17 | Sh3bgrl3      | NM_080559.1 | Mus musculus SH3 domain binding glutamic acid-rich protein-like 3 (Sh3bgrl3), mRNA.                |
| scl000708.1 100-S    | -44.1369 | -1.98 | Atp6v0d1      | NM_013477.2 | Mus musculus ATPase, H+ transporting, V0 subunit D isoform 1 (Atp6v0d1), mRNA.                     |
| scl32956.7.1 6-S     | -44.0614 | -1.6  | Ethe1         | NM_023154.2 | Mus musculus ethylmalonic encephalopathy 1 (Ethe1), mRNA.                                          |
| scl28804.3 1-S       | -43.9814 | -2.75 | Wbp1          | NM_016757.1 | Mus musculus WW domain binding protein 1 (Wbp1), mRNA.                                             |
| scl0104457.3 1-S     | -43.4985 | -2.88 | 0610010K14Rik | NM_026757.1 | Mus musculus RIKEN cDNA 0610010K14 gene (0610010K14Rik), mRNA.                                     |
| scl31668.16.1 1-S    | -43.4449 | -5.59 | Lu            | NM_020486.1 | Mus musculus Lutheran blood group (Auberger b antigen included) (Lu), mRNA.                        |
| scl30720.15 54-S     | -43.1602 | -1.39 | Gga2          | XM_133801.3 | Mus musculus golgi associated, gamma adaptin ear containing, ARF binding protein 2 (Gga2), mRNA.   |

|               |            |          |       |               |                   |                                                                                                                              |
|---------------|------------|----------|-------|---------------|-------------------|------------------------------------------------------------------------------------------------------------------------------|
| sci0071949.2  | 8-S        | -43.104  | -1.68 | Lass5         | NM_028015.2       | Mus musculus longevity assurance homolog 5 ( <i>S. cerevisiae</i> ) ( <i>Lass5</i> ), mRNA.                                  |
| sci0003622.1  | 15-S       | -42.7568 | -2.01 | Nqo2          | NM_020282.2       | Mus musculus NAD(P)H dehydrogenase, quinone 2 ( <i>Nqo2</i> ), mRNA.                                                         |
| sci055949.3   | 17-S       | -42.6355 | -1.26 | Eef1b2        | NM_018796.2       | Mus musculus eukaryotic translation elongation factor 1 beta 2 ( <i>Eef1b2</i> ), mRNA.                                      |
| sci068377.10  | 23-S       | -42.5747 | -2.05 | Acta2         | NM_007392.2       | Mus musculus RIKEN cDNA 0610041G09 gene ( <i>0610041G09Rik</i> ), mRNA.                                                      |
| sci0068045.1  | 0-S        | -42.4888 | -2.48 | 2700060E02Rik | NM_026528.1       | Mus musculus RIKEN cDNA 2700060E02 gene ( <i>2700060E02Rik</i> ), mRNA.                                                      |
| sci0002269.1  | 18-S       | -42.4271 | -6.92 | Matr3         | NM_010771.3       | Mus musculus matrin 3 ( <i>Matr3</i> ), mRNA.                                                                                |
| sci020218.6   | 1-S        | -42.3334 | -5.41 | Khdrbs1       | NM_011317.2       | Mus musculus KH domain containing, RNA binding, signal transduction associated 1 ( <i>Khdrbs1</i> ), mRNA.                   |
| sci0014670.2  | 304-S      | -42.313  | -1.62 | Gna-rs1       | NM_008136.1       | Mus musculus guanine nucleotide binding protein, related sequence 1 ( <i>Gna-rs1</i> ), mRNA.                                |
| sci38956.10   | 80-S       | -42.2991 | -1.55 | Rtn4ip1       | NM_130892.2       | Mus musculus reticulon 4 interacting protein 1 ( <i>Rtn4ip1</i> ), mRNA.                                                     |
| sci0068272.1  | 99-S       | -42.2905 | -1.65 | Rbm28         | NM_133925.1       |                                                                                                                              |
| sci000468.1   | 25-S       | -42.2891 | -1.42 | Mpl43         | NM_053164.2       | Mus musculus mitochondrial ribosomal protein L43 ( <i>Mpl43</i> ), nuclear gene encoding mitochondrial protein, mRNA.        |
| sci0002320.1  | 23-S       | -42.2292 | -3.04 | Adssl1        | NM_007421.1       |                                                                                                                              |
| sci012462.9   | 0-S        | -42.2179 | -1.57 | Cct3          | NM_009836.1       | Mus musculus chaperonin subunit 3 ( <i>gamma</i> ) ( <i>Cct3</i> ), mRNA.                                                    |
| sci40689.20   | 176-S      | -42.1985 | -4.49 |               | 39334 NM_017380.1 | Mus musculus septin 9 ( <i>Sept9</i> ), mRNA.                                                                                |
| sci19720.5    | 23-S       | -42.1338 | -1.95 | Echdc3        | NM_024208.3       | Mus musculus enoyl Coenzyme A hydratase domain containing 3 ( <i>Echdc3</i> ), mRNA.                                         |
| sci014693.1   | 109-S      | -42.1151 | -1.39 | Gnb2          | NM_010312.3       | Mus musculus guanine nucleotide binding protein, beta 2 ( <i>Gnb2</i> ), mRNA.                                               |
| sci42385.21   | 636-S      | -42.1053 | -2.54 | Sos2          | XM_127051.3       | Mus musculus Son of sevenless homolog 2 ( <i>Drosophila</i> ) ( <i>Sos2</i> ), mRNA.                                         |
| sci0001329.1  | 110-S      | -42.0705 | -1.44 | 0610009H04Rik | NM_018854.3       | Mus musculus RIKEN cDNA 0610009H04 gene ( <i>0610009H04Rik</i> ), mRNA.                                                      |
| sci000679.1   | 109-S      | -42.0523 | -2.04 | 1810045K07Rik | NM_026432.2       | Mus musculus RIKEN cDNA 1810045K07 gene ( <i>1810045K07Rik</i> ), mRNA.                                                      |
| sci068077.3   | 0-S        | -42.002  | -1.5  | Gltscr2       | NM_133831.1       | Mus musculus glioma tumor suppressor candidate region gene 2 ( <i>Gltscr2</i> ), mRNA.                                       |
| sci52796.6    | 1 4-S      | -41.953  | -1.55 | Acy3          | NM_027857.2       |                                                                                                                              |
| sci0003098.1  | 1-S        | -41.9396 | -1.41 | Snrpb         | NM_009225.1       | Mus musculus small nuclear ribonucleoprotein B ( <i>Snrpb</i> ), mRNA.                                                       |
| sci23887.17   | 103-S      | -41.7931 | -1.33 | Ctps          | NM_016748.1       | Mus musculus cytidine 5-triphosphate synthase ( <i>Ctps</i> ), mRNA.                                                         |
| sci0053607.2  | 0-S        | -41.771  | -2.4  | Snrpa         | NM_015782.2       | Mus musculus small nuclear ribonucleoprotein polypeptide A ( <i>Snrpa</i> ), mRNA.                                           |
| sci026893.9   | 4-S        | -41.5601 | -1.27 | Cops6         | NM_012002.1       | Mus musculus COP9 (constitutive photomorphogenic) homolog, subunit 6 ( <i>Arabidopsis thaliana</i> ) ( <i>Cops6</i> ), mRNA. |
| sci0001574.1  | 5-S        | -41.1872 | -4.64 | G3bp          | NM_013716.1       | Mus musculus Ras-GTPase-activating protein SH3-domain binding protein ( <i>G3bp</i> ), mRNA.                                 |
| sci31033.2    | 1 0-S      | -41.1378 | -3.68 | Thrsp         | NM_009381.2       | Mus musculus thyroid hormone responsive SPOT14 homolog ( <i>Rattus</i> ) ( <i>Thrsp</i> ), mRNA.                             |
| sci014790.2   | 94-S       | -41.1153 | -1.28 | Grccl0        | NM_013535.1       | Mus musculus gene rich cluster, C10 gene ( <i>Grccl0</i> ), mRNA.                                                            |
| sci27505.17   | 595-S      | -41.0973 | -1.35 | Pkd2          | NM_008861.2       | Mus musculus polycystic kidney disease 2 ( <i>Pkd2</i> ), mRNA.                                                              |
| sci33423.6    | 118-S      | -41.0652 | -1.4  | Cbfb          | NM_022309.2       | Mus musculus core binding factor beta ( <i>Cbfb</i> ), mRNA.                                                                 |
| sci0001255.1  | 2-S        | -40.9315 | -6.15 | 2500002L14Rik | NM_025607.2       | Mus musculus RIKEN cDNA 2500002L14 gene ( <i>2500002L14Rik</i> ), mRNA.                                                      |
| sci0234852.1  | 50-S       | -40.9038 | -1.32 | Pcoln3        | NM_145606.1       | Mus musculus procollagen (type III) N-endopeptidase ( <i>Pcoln3</i> ), mRNA.                                                 |
| sci25011.1    | 1.118 77-S | -40.8935 | -1.56 | Cited4        | NM_019563         | Mus musculus Cbp/p300-interacting transactivator, with Glu/Asp-rich carboxy-terminal domain, 4 ( <i>Cited4</i> ), mRNA.      |
| sci0018938.1  | 81-S       | -40.8915 | -1.44 | Ppp1r14b      | NM_008889.1       | Mus musculus protein phosphatase 1, regulatory (inhibitor) subunit 14B ( <i>Ppp1r14b</i> ), mRNA.                            |
| sci000986.1   | 622-S      | -40.8297 | -1.35 | Insig2        | NM_133748.1       | Mus musculus insulin induced gene 2 ( <i>Insig2</i> ), mRNA.                                                                 |
| sci0056304.1  | 278-S      | -40.7637 | -2.1  | LOC56304      | NM_019633.1       | Mus musculus recombinant antineuraminidase single chain Ig VH and VL domains ( <i>LOC56304</i> ), mRNA.                      |
| sci067105.6   | 6-S        | -40.6689 | -1.96 | 1700034H14Rik | NM_025969.1       | Mus musculus RIKEN cDNA 1700034H14 gene ( <i>1700034H14Rik</i> ), mRNA.                                                      |
| sci00223455.2 | 26-S       | -40.6484 | -2.04 | F830029L24Rik | NM_172606.1       | Mus musculus RIKEN cDNA F830029L24 gene ( <i>F830029L24Rik</i> ), mRNA.                                                      |
| sci0070396.1  | 30-S       | -40.6097 | -1.67 | 2210409M21Rik | NM_133728.2       | Mus musculus RIKEN cDNA 2210409M21 gene ( <i>2210409M21Rik</i> ), mRNA.                                                      |
| sci016012.5   | 14-S       | -40.5851 | -2.06 | Igfbp6        | NM_008344.1       | Mus musculus insulin-like growth factor binding protein 6 ( <i>Igfbp6</i> ), mRNA.                                           |
| sci34048.16   | 227 13-S   | -40.5664 | -1.68 | Cdc16         | NM_027276.1       | Mus musculus CDC16 cell division cycle 16 homolog ( <i>S. cerevisiae</i> ) ( <i>Cdc16</i> ), mRNA.                           |
| sci015510.1   | 74-S       | -40.4878 | -1.25 | Hspd1         | NM_010477.2       | Mus musculus heat shock protein 1 (chaperonin) ( <i>Hspd1</i> ), mRNA.                                                       |
| sci020443.1   | 125-S      | -40.4709 | -3.02 | Siat4c        | NM_009178.2       | Mus musculus sialyltransferase 4C (beta-galactoside alpha-2,3-sialyltransferase) ( <i>Siat4c</i> ), mRNA.                    |
| sci46411.5    | 1 45-S     | -40.4695 | -1.8  | 1810009H17Rik | XM_283205.1       |                                                                                                                              |
| sci0077975.2  | 18-S       | -40.4384 | -1.48 | B230114J08Rik | NM_030018.2       | Mus musculus RIKEN cDNA B230114J08 gene ( <i>B230114J08Rik</i> ), mRNA.                                                      |
| sci50509.4    | 211-S      | -40.419  | -2.07 | Lbh           | NM_029999.3       | Mus musculus limb-bud and heart ( <i>Lbh</i> ), mRNA.                                                                        |
| sci0319710.13 | 85-S       | -40.3884 | -1.64 | 4930488L10Rik | NM_028127.3       | Mus musculus RIKEN cDNA 4930488L10 gene ( <i>4930488L10Rik</i> ), mRNA.                                                      |
| sci0002942.1  | 1346-S     | -40.2196 | -2.09 | Mic21l        | NM_138309.1       | Mus musculus MIC2 (monoclonal Imperial Cancer Research Fund 2)-like 1 ( <i>Mic21l</i> ), mRNA.                               |
| sci47780.3    | 9 1-S      | -40.205  | -1.25 | Rpl8          | NM_012053.1       | Mus musculus ribosomal protein L8 ( <i>Rpl8</i> ), mRNA.                                                                     |
| sci39110.7    | 1 195-S    | -40.1028 | -3.12 | E230031K19    | NM_172786.1       | Mus musculus hypothetical protein E230031K19 ( <i>E230031K19</i> ), mRNA.                                                    |
| sci0077038.2  | 139-S      | -40.0938 | -1.46 | Zfp289        | NM_023854.1       | Mus musculus zinc finger protein 289 ( <i>Zfp289</i> ), mRNA.                                                                |
| sci068436.2   | 19-S       | -40.05   | -1.36 | 1100001I22Rik | XM_485311         |                                                                                                                              |
| sci20983.4    | 177-S      | -39.9983 | -1.44 | Arpc5l        | NM_028809.1       | Mus musculus actin related protein 2/3 complex, subunit 5-like ( <i>Arpc5l</i> ), mRNA.                                      |
| sci014870.5   | 30-S       | -39.998  | -1.26 | Gstp1         | NM_013541.1       | Mus musculus glutathione S-transferase, pi 1 ( <i>Gstp1</i> ), mRNA.                                                         |
| sci000645.1   | 1-S        | -39.9413 | -1.61 | 2010315L10Rik | NM_025917.1       | Mus musculus RIKEN cDNA 2010315L10 gene ( <i>2010315L10Rik</i> ), mRNA.                                                      |
| sci30088.4    | 382-S      | -39.8586 | -1.4  | 0610006O14Rik | NM_133764.1       | Mus musculus RIKEN cDNA 0610006O14 gene ( <i>0610006O14Rik</i> ), mRNA.                                                      |

|               |       |          |       |               |             |                                                                                                                 |
|---------------|-------|----------|-------|---------------|-------------|-----------------------------------------------------------------------------------------------------------------|
| scl0001320.1  | 85-S  | -39.7139 | -1.28 | Mdh1          | NM_008618.2 | Mus musculus malate dehydrogenase 1, NAD (soluble) (Mdh1), mRNA.                                                |
| scl0002964.1  | 2-S   | -39.6952 | -7.54 | Sh3kbp1       | NM_021389.3 | Mus musculus SH3-domain kinase binding protein 1 (Sh3kbp1), mRNA.                                               |
| scl071941.3   | 29-S  | -39.6042 | -1.38 | 2310051N18Rik | XM_134026.4 | Mus musculus RIKEN cDNA 2310051N18 gene (2310051N18Rik), mRNA.                                                  |
| scl0012180.2  | 196-S | -39.5672 | -1.97 | Smyd1         | NM_009762.1 | Mus musculus SET and MYND domain containing 1 (Smyd1), mRNA.                                                    |
| scl19211.5    | 285-S | -39.5174 | -2.9  | Fign          | NM_021716.1 | Mus musculus fidgetin (Fign), mRNA.                                                                             |
| scl48193.7    | 228-S | -39.4861 | -1.42 | Dscr1         | NM_019466.2 | Mus musculus Down syndrome critical region homolog 1 (human) (Dscr1), mRNA.                                     |
| scl0270106.4  | 75-S  | -39.4718 | -1.24 | Rpl13         | NM_016738   | Mus musculus ribosomal protein L13 (Rpl13), mRNA.                                                               |
| scl066306.4   | 122-S | -39.2913 | -3.02 | 2810012G03Rik | NM_175104.3 | Mus musculus RIKEN cDNA 2810012G03 gene (2810012G03Rik), mRNA.                                                  |
| scl000287.1   | 1-S   | -39.2033 | -1.29 | Ai043088      | NM_198613.1 | Mus musculus expressed sequence Ai043088 (Ai043088), mRNA.                                                      |
| scl058810.1   | 30-S  | -39.2022 | -1.26 | Akr1a4        | NM_021473.2 | Mus musculus aldo-keto reductase family 1, member A4 (aldehyde reductase) (Akr1a4), mRNA.                       |
| scl0050875.1  | 33-S  | -39.0008 | -1.45 | Tmod3         | NM_016963.1 | Mus musculus tropomodulin 3 (Tmod3), mRNA.                                                                      |
| scl000395.1   | 15-S  | -38.9967 | -1.47 | Adk           | NM_134079   | Mus musculus adenosine kinase (Adk), mRNA.                                                                      |
| scl0003800.1  | 141-S | -38.9635 | -1.4  | Tfam          | NM_009360.2 | Mus musculus transcription factor A, mitochondrial (Tfam), mRNA.                                                |
| scl50660.8.1  | 1-S   | -38.9586 | -1.43 | Mrps10        | NM_183086.1 | Mus musculus mitochondrial ribosomal protein S10 (Mrps10), mRNA.                                                |
| scl072195.1   | 127-S | -38.9031 | -2.28 | 2610524B01Rik | XM_355594   | Mus musculus RIKEN cDNA 2610524B01 gene (2610524B01Rik), mRNA.                                                  |
| scl39065.17   | 337-S | -38.8694 | -2.66 | Arhgap18      | NM_176837.1 | Mus musculus Rho GTPase activating protein 18 (Arhgap18), mRNA.                                                 |
| scl31391.7.1  | 2-S   | -38.7886 | -2.07 | Rcn3          | NM_026555.1 | Mus musculus reticulocalbin 3, EF-hand calcium binding domain (Rcn3), mRNA.                                     |
| scl0003727.1  | 2-S   | -38.7861 | -3.91 | Hnrpk         | NM_025279.1 | Mus musculus heterogeneous nuclear ribonucleoprotein K (Hnrpk), mRNA.                                           |
| scl00223696.2 | 201-S | -38.7623 | -1.35 | Tomm22        | NM_172609.2 | Mus musculus translocase of outer mitochondrial membrane 22 homolog (yeast) (Tomm22), mRNA.                     |
| scl0116891.1  | 127-S | -38.6883 | -1.48 | BC005682      | NM_033562.2 | Mus musculus cDNA sequence BC005682 (BC005682), mRNA.                                                           |
| scl0002190.1  | 16-S  | -38.6764 | -3.11 | Fech          | NM_007998.3 | Mus musculus ferrochelatase (Fech), mRNA.                                                                       |
| scl41467.7    | 13-S  | -38.6092 | -1.9  | Mfap4         | NM_029568.1 | Mus musculus microfibrillar-associated protein 4 (Mfap4), mRNA.                                                 |
| scl012558.4   | 4-S   | -38.5127 | -1.76 | Cdh2          | NM_007664.1 | Mus musculus cadherin 2 (Cdh2), mRNA.                                                                           |
| scl00217869.1 | 91-S  | -38.508  | -1.51 | Eif5          | NM_173363.2 | Mus musculus eukaryotic translation initiation factor 5 (Eif5), mRNA.                                           |
| scl0012540.1  | 20-S  | -38.4876 | -1.3  | Cdc42         | NM_009861.1 | Mus musculus cell division cycle 42 homolog (S. cerevisiae) (Cdc42), mRNA.                                      |
| scl00229534.2 | 23-S  | -38.4199 | -1.66 | Pbxip1        | NM_146131.1 | Mus musculus pre-B-cell leukemia transcription factor interacting protein 1 (Pbxip1), mRNA.                     |
| scl50733.5.1  | 21-S  | -38.3277 | -3.86 | H2-M3         | NM_013819.1 | Mus musculus histocompatibility 2, M region locus 3 (H2-M3), mRNA.                                              |
| scl019182.11  | 5-S   | -38.1145 | -1.25 | Psmc3         | NM_008948.1 | Mus musculus proteasome (prosome, macropain) 26S subunit, ATPase 3 (Psmc3), mRNA.                               |
| scl018102.1   | 15-S  | -38.0768 | -1.51 | Nme1          | NM_008704.2 | Mus musculus expressed in non-metastatic cells 1, protein (Nme1), mRNA.                                         |
| scl0192170.3  | 20-S  | -38.0053 | -1.43 | Ddx48         | NM_138669.1 | Mus musculus DEAD (Asp-Glu-Ala-Asp) box polypeptide 48 (Ddx48), mRNA.                                           |
| scl50768.5    | 1-S   | -37.8964 | -1.66 | 2310014H01Rik | XM_355011.1 | Mus musculus RIKEN cDNA 2310014H01 gene (2310014H01Rik), mRNA.                                                  |
| scl18851.3    | 427-S | -37.7183 | -3.04 | 6430601A21Rik | NM_175466.2 | Mus musculus RIKEN cDNA 6430601A21 gene (6430601A21Rik), mRNA.                                                  |
| scl0018537.2  | 170-S | -37.6933 | -1.36 | Pcmt1         | NM_008786.1 | Mus musculus protein-L-isoaspartate (D-aspartate) O-methyltransferase 1 (Pcmt1), mRNA.                          |
| scl000715.1   | 17-S  | -37.6722 | -1.99 | Got2          | NM_010325.1 | Mus musculus glutamate oxaloacetate transaminase 2, mitochondrial (Got2), mRNA.                                 |
| scl000737.1   | 18-S  | -37.5445 | -2.43 | Atp6v0d1      | NM_013477.2 | Mus musculus ATPase, H+ transporting, V0 subunit D isoform 1 (Atp6v0d1), mRNA.                                  |
| scl33551.36   | 1-S   | -37.4246 | -2    | Phkb          | NM_199446.1 | Mus musculus phosphorylase kinase beta (Phkb), mRNA.                                                            |
| scl38623.34   | 689-S | -37.4084 | -1.46 | A230046K03Rik | XM_193573.3 | Mus musculus RIKEN cDNA A230046K03 gene (A230046K03Rik), mRNA.                                                  |
| scl49235.18   | 0-S   | -37.3634 | -2.68 | Tfrc          | NM_011638.3 | Mus musculus transferrin receptor (Tfrc), mRNA.                                                                 |
| scl0002163.1  | 25-S  | -37.3403 | -1.43 | Acaa2         | NM_177470   | Mus musculus acetyl-Coenzyme A acyltransferase 2 (mitochondrial 3-oxoacyl-Coenzyme A thiolase) (Acaa2), mRNA.   |
| scl38595.2    | 598-S | -37.3355 | -1.31 | C630002B14Rik | NM_175331.2 | Mus musculus RIKEN cDNA C630002B14 gene (C630002B14Rik), mRNA.                                                  |
| scl068460.2   | 9-S   | -37.1957 | -1.44 | 1110001P11Rik | XM_126127.3 | Mus musculus RIKEN cDNA 1110001P11 gene (1110001P11Rik), mRNA.                                                  |
| scl23892.3.1  | 1-S   | -37.1732 | -1.6  | 6330579B17Rik | NM_026494.1 | Mus musculus RIKEN cDNA 6330579B17 gene (6330579B17Rik), mRNA.                                                  |
| scl37031.1    | 4-S   | -37.1597 | -3.02 | Bcl9l         | NM_030256.1 | Mus musculus B-cell CLL/lymphoma 9-like (Bcl9l), mRNA.                                                          |
| scl0002631.1  | 50-S  | -37.1282 | -1.41 | Eif3s2        | NM_018799.1 | Mus musculus eukaryotic translation initiation factor 3, subunit 2 (beta) (Eif3s2), mRNA.                       |
| scl44070.4.1  | 3-S   | -37.1265 | -2.11 | Eef1e1        | NM_025380.1 | Mus musculus eukaryotic translation elongation factor 1 epsilon 1 (Eef1e1), mRNA.                               |
| scl066506.1   | 15-S  | -37.0836 | -7.43 | 1810042K04Rik | NM_025604.1 | Mus musculus RIKEN cDNA 1810042K04 gene (1810042K04Rik), mRNA.                                                  |
| scl20640.7.7  | 31-S  | -36.7613 | -8.47 | Pacsin3       | NM_028733.1 | Mus musculus protein kinase C and casein kinase substrate in neurons 3 (Pacsin3), mRNA.                         |
| scl15745.2.1  | 5-S   | -36.6492 | -2.1  | G0s2          | NM_008059.1 | Mus musculus G0/G1 switch gene 2 (G0s2), mRNA.                                                                  |
| scl066310.2   | 4-S   | -36.6369 | -1.3  | 2810410M20Rik | NM_024428   | Mus musculus RIKEN cDNA 2810410M20 gene (2810410M20Rik), mRNA.                                                  |
| scl47844.7.1  | 12-S  | -36.5514 | -5.98 | Khdrbs3       | NM_010158.1 | Mus musculus KH domain containing, RNA binding, signal transduction associated 3 (Khdrbs3), mRNA.               |
| scl38665.9.1  | 23-S  | -36.5305 | -1.38 | Map2k2        | NM_023138.3 | Mus musculus mitogen activated protein kinase kinase 2 (Map2k2), mRNA.                                          |
| scl022088.2   | 10-S  | -36.48   | -1.44 | Tsg101        | NM_021884.1 | Mus musculus tumor susceptibility gene 101 (Tsg101), mRNA.                                                      |
| scl48922.5.43 | 8-S   | -36.4558 | -1.29 | Jam2          | NM_023844.2 | Mus musculus junction adhesion molecule 2 (Jam2), mRNA.                                                         |
| scl19661.4.1  | 12-S  | -36.273  | -1.45 | Ptpla         | NM_013935.1 | Mus musculus protein tyrosine phosphatase-like (proline instead of catalytic arginine), member a (Ptpla), mRNA. |
| scl46892.6    | 503-S | -36.2556 | -1.4  | BC025519      | XM_110101.3 | Mus musculus cDNA sequence BC025519 (BC025519), mRNA.                                                           |
| scl0002846.1  | 27-S  | -36.1337 | -1.82 | Akr7a5        | NM_020537.2 | Mus musculus aldo-keto reductase family 7, member A5 (aflatxin aldehyde reductase) (Akr7a5), mRNA.              |

|                |          |          |        |               |             |                                                                                                                                                                  |
|----------------|----------|----------|--------|---------------|-------------|------------------------------------------------------------------------------------------------------------------------------------------------------------------|
| sc1029876.1    | 93-S     | -36.0654 | -1.6   | Clic4         | XM 124389.1 | Mus musculus chloride intracellular channel 4 (mitochondrial) (Clic4), mRNA.                                                                                     |
| sc133074.8.142 | 21-S     | -36.0639 | -1.35  | Rps5          | NM 009095   | Mus musculus ribosomal protein S5 (Rps5), mRNA.                                                                                                                  |
| sc1022021.6    | 75-S     | -36.0273 | -1.48  | Tpst1         | NM 013837.1 | Mus musculus protein-tyrosine sulfotransferase 1 (Tpst1), mRNA.                                                                                                  |
| sc10001807.1   | 51-S     | -35.9929 | -2.25  | Bfar          | NM 025976   | Mus musculus bifunctional apoptosis regulator (Bfar), mRNA.                                                                                                      |
| sc10353156.8   | 65-S     | -35.9685 | -1.41  | Egfl7         | NM 198724.1 | Mus musculus EGF-like domain 7 (Egfl7), transcript variant b, mRNA.                                                                                              |
| sc1014998.4    | 34-S     | -35.962  | -7.57  | H2-DMa        | NM 010386   | Mus musculus histocompatibility 2, class II, locus DMA (H2-DMa), mRNA.                                                                                           |
| GI_21746160-S  |          | -35.9618 | -10.76 | 2410129E14Rik | NM 023716.1 | Mus musculus RIKEN cDNA 2410129E14 gene (2410129E14Rik), mRNA.                                                                                                   |
| sc10001289.1   | 85-S     | -35.958  | -1.54  | Sgca          | NM 009161.1 | Mus musculus sarcoglycan, alpha (dystrophin-associated glycoprotein) (Sgca), mRNA.                                                                               |
| sc10056428.2   | 17-S     | -35.8873 | -1.36  | Mtch2         | NM 019758.2 | Mus musculus mitochondrial carrier homolog 2 (C. elegans) (Mtch2), mRNA.                                                                                         |
| sc10022350.2   | 262-S    | -35.7052 | -1.56  | Vil2          | NM 009510.1 | Mus musculus villin 2 (Vil2), mRNA.                                                                                                                              |
| sc139238.2.1   | 49-S     | -35.6695 | -1.29  | 1810049H13Rik | NM 025560.1 | Mus musculus RIKEN cDNA 1810049H13 gene (1810049H13Rik), mRNA.                                                                                                   |
| sc1027407.6    | 4-S      | -35.6651 | -1.69  | Abcf2         | NM 013853.1 | Mus musculus ATP-binding cassette, sub-family F (GCN20), member 2 (Abcf2), mRNA.                                                                                 |
| sc1071784.1    | 62-S     | -35.6449 | -2.34  | 1110007C02Rik | NM 027923.1 | Mus musculus RIKEN cDNA 1110007C02 gene (1110007C02Rik), mRNA.                                                                                                   |
| sc135348.11.1  | 65-S     | -35.6445 | -6.26  | 4933406E20Rik | NM 028944.2 | Mus musculus RIKEN cDNA 4933406E20 gene (4933406E20Rik), mRNA.                                                                                                   |
| sc125663.5     | 353-S    | -35.6343 | -2.09  | C130086A10    | NM 173746.2 | Mus musculus hypothetical protein C130086A10 (C130086A10), mRNA.                                                                                                 |
| sc1067941.3    | 4-S      | -35.6162 | -1.23  | Rps27l        | NM 026467.1 | Mus musculus ribosomal protein S27-like (Rps27l), mRNA.                                                                                                          |
| sc151379.4     | 394-S    | -35.562  | -2.06  | 2010002N04Rik | NM 134133.1 |                                                                                                                                                                  |
| sc1056541.13   | 2-S      | -35.5031 | -1.64  | Habp4         | NM 019986   | Mus musculus hyaluronic acid binding protein 4 (Habp4), mRNA.                                                                                                    |
| sc125278.23    | 305-S    | -35.4718 | -1.61  | Tek           | NM 013690.1 | Mus musculus endothelial-specific receptor tyrosine kinase (Tek), mRNA.                                                                                          |
| sc10022792.2   | 35-S     | -35.4669 | -1.6   | Zrf2          | NM 009584   | Mus musculus zuotin related factor 2 (Zrf2), mRNA.                                                                                                               |
| sc1067097.5    | 20-S     | -35.4657 | -1.24  | Rps10         | NM 025963   | Mus musculus ribosomal protein S10 (Rps10), mRNA.                                                                                                                |
| sc10012859.2   | 116-S    | -35.3753 | -1.24  | Cox5b         | NM 009942.1 | Mus musculus cytochrome c oxidase, subunit Vb (Cox5b), mRNA.                                                                                                     |
| sc149065.9.1   | 50-S     | -35.3317 | -1.52  | Apg3l         | NM 026402.1 |                                                                                                                                                                  |
| sc1067278.1    | 10-S     | -35.2217 | -1.85  | 2900092E17Rik | NM 030240.1 | Mus musculus RIKEN cDNA 2900092E17 gene (2900092E17Rik), mRNA.                                                                                                   |
| sc149975.4     | 297 19-S | -35.2181 | -2.4   | Tubb5         | NM 011655.2 | Mus musculus tubulin, beta 5 (Tubb5), mRNA.                                                                                                                      |
| sc118180.9.1   | 47-S     | -35.1764 | -2.32  | A030012M09Rik | NM 183028.1 | Mus musculus RIKEN cDNA A030012M09 gene (A030012M09Rik), mRNA.                                                                                                   |
| sc145535.5     | 307-S    | -35.1404 | -1.48  | 1810034K20Rik | NM 023397.3 | Mus musculus RIKEN cDNA 1810034K20 gene (1810034K20Rik), mRNA.                                                                                                   |
| sc10014719.1   | 330-S    | -35.1281 | -1.27  | Got2          | NM 010325.1 | Mus musculus glutamate oxaloacetate transaminase 2, mitochondrial (Got2), mRNA.                                                                                  |
| sc100320711.2  | 57-S     | -35.0764 | -1.52  | 9830147P19Rik | NM 177238.2 | Mus musculus RIKEN cDNA 9830147P19 gene (9830147P19Rik), mRNA.                                                                                                   |
| sc1012260.3    | 14-S     | -35.0393 | -1.82  | C1qb          | NM 009777.1 | Mus musculus complement component 1, q subcomponent, beta polypeptide (C1qb), mRNA.                                                                              |
| sc1000628.1    | 299-S    | -35.0391 | -1.43  | Arl2bp        | NM 024191.1 | Mus musculus ADP-ribosylation factor-like 2 binding protein (Arl2bp), mRNA.                                                                                      |
| sc1067939.1    | 2-S      | -35.034  | -1.41  | 2010316F05Rik | NM 026465.1 | Mus musculus RIKEN cDNA 2010316F05 gene (2010316F05Rik), mRNA.                                                                                                   |
| sc151415.5.1   | 5-S      | -35.0076 | -1.89  | Ppic          | NM 008908.1 | Mus musculus peptidylprolyl isomerase C (Ppic), mRNA.                                                                                                            |
| sc10060365.1   | 251-S    | -34.9936 | -1.98  | Rbm8          | NM 025875.1 | Mus musculus RNA binding motif protein 8 (Rbm8), mRNA.                                                                                                           |
| sc1000210.1    | 44-S     | -34.9798 | -7.96  | Eif4g2        | NM 013507.2 | Mus musculus eukaryotic translation initiation factor 4, gamma 2 (Eif4g2), mRNA.                                                                                 |
| sc135042.9.1   | 7-S      | -34.8792 | -5.68  | Agpt2         | NM 007426.2 | Mus musculus angiotensin II (Agpt2), mRNA.                                                                                                                       |
| sc1019070.8    | 188-S    | -34.8378 | -3.71  | Prei3         | NM 025283.2 | Mus musculus preimplantation protein 3 (Prei3), mRNA.                                                                                                            |
| sc127589.4     | 81-S     | -34.8318 | -1.57  | 9130213B05Rik | NM 145562.1 | Mus musculus RIKEN cDNA 9130213B05 gene (9130213B05Rik), mRNA.                                                                                                   |
| sc1028019.8    | 226-S    | -34.7276 | -3.17  | Ing4          | NM 133345.1 | Mus musculus inhibitor of growth family, member 4 (Ing4), mRNA.                                                                                                  |
| sc142591.3.1   | 5-S      | -34.6891 | -1.67  | Idb2          | NM 010496.2 | Mus musculus inhibitor of DNA binding 2 (Idb2), mRNA.                                                                                                            |
| sc146497.11.10 | 2-S      | -34.5808 | -2.24  | 2510015F01Rik | XM 354801.1 | Mus musculus RIKEN cDNA 2510015F01 gene (2510015F01Rik), mRNA.                                                                                                   |
| sc138368.11    | 94-S     | -34.5449 | -1.3   | Wif1          | NM 011915.1 | Mus musculus Wnt inhibitory factor 1 (Wif1), mRNA.                                                                                                               |
| sc1016210.11   | 31-S     | -34.5383 | -1.5   | Impact        | NM 008378.1 | Mus musculus imprinted and ancient (Impact), mRNA.                                                                                                               |
| sc10227613.1   | 83-S     | -34.5073 | -1.51  | 4930542G03Rik | NM 146116.1 | Mus musculus RIKEN cDNA 4930542G03 gene (4930542G03Rik), mRNA.                                                                                                   |
| sc124545.4.1   | 12-S     | -34.5067 | -1.41  | 6720467C03Rik | NM 026558.2 | Mus musculus RIKEN cDNA 6720467C03 gene (6720467C03Rik), mRNA.                                                                                                   |
| sc100142682.1  | 213-S    | -34.4787 | -1.73  | Zcchc14       | NM 080855.1 |                                                                                                                                                                  |
| sc10004026.1   | 20-S     | -34.4176 | -1.77  | Hadhb         | NM 145558   | Mus musculus hydroxyacyl-Coenzyme A dehydrogenase/3-ketoacyl-Coenzyme A thiolase/enoyl-Coenzyme A hydratase (trifunctional protein), beta subunit (Hadhb), mRNA. |
| sc1000615.1    | 57-S     | -34.4102 | -5.02  | Cdh13         | NM 019707.1 | Mus musculus cadherin 13 (Cdh13), mRNA.                                                                                                                          |
| sc154739.8.5   | 29-S     | -34.3762 | -1.31  | Itgb1bp2      | NM 013712.1 | Mus musculus integrin beta 1 binding protein 2 (Itgb1bp2), mRNA.                                                                                                 |
| sc12926.4      | 8-S      | -34.3553 | -1.27  | 6720456B07Rik | NM 133937.1 | Mus musculus RIKEN cDNA 6720456B07 gene (6720456B07Rik), mRNA.                                                                                                   |
| sc10058249.2   | 204-S    | -34.2762 | -1.39  | Fibp          | NM 021438.1 | Mus musculus fibroblast growth factor (acidic) intracellular binding protein (Fibp), mRNA.                                                                       |
| sc10068585.2   | 67-S     | -34.1956 | -1.25  | Rtn4          | NM 194054.1 | Mus musculus reticulon 4 (Rtn4), transcript variant 5, mRNA.                                                                                                     |
| sc10012837.1   | 129-S    | -34.1277 | -1.91  | Col8a1        | NM 007739.1 | Mus musculus procollagen, type VIII, alpha 1 (Col8a1), mRNA.                                                                                                     |
| sc135489.7     | 147-S    | -34.1181 | -1.24  | Atp1b3        | NM 007502.1 | Mus musculus ATPase, Na <sup>+</sup> /K <sup>+</sup> transporting, beta 3 polypeptide (Atp1b3), mRNA.                                                            |
| sc100048.1     | 13-S     | -34.1104 | -1.42  | Sirt3         | NM 022433   | Mus musculus sirtuin 3 (silent mating type information regulation 2, homolog 3) (S. cerevisiae) (Sirt3), mRNA.                                                   |
| sc1067674.3    | 12-S     | -34.045  | -1.81  | 0610038D11Rik | NM 026306.1 | Mus musculus RIKEN cDNA 0610038D11 gene (0610038D11Rik), mRNA.                                                                                                   |

|               |         |          |       |               |             |                                                                                                                     |
|---------------|---------|----------|-------|---------------|-------------|---------------------------------------------------------------------------------------------------------------------|
| scl0068493.2  | 155-S   | -33.9207 | -1.54 | 1110007M04Rik | NM_026742.1 | Mus musculus RIKEN cDNA 1110007M04 gene (1110007M04Rik), mRNA.                                                      |
| scl0067264.2  | 318-S   | -33.9121 | -1.31 | Ndufb8        | NM_026061.1 | Mus musculus NADH dehydrogenase (ubiquinone) 1 beta subcomplex 8 (Ndufb8), mRNA.                                    |
| scl42555.3    | 391-S   | -33.8307 | -2.43 | Gpr22         | NM_175191.2 | Mus musculus G protein-coupled receptor 22 (Gpr22), mRNA.                                                           |
| scl0076438.2  | 4-S     | -33.6407 | -1.47 | 2310015N21Rik | NM_181397.1 | Mus musculus RIKEN cDNA 2310015N21 gene (2310015N21Rik), mRNA.                                                      |
| scl32695.9    | 13_0-S  | -33.6235 | -1.66 | Nosip         | NM_025533.1 | Mus musculus nitric oxide synthase interacting protein (Nosip), mRNA.                                               |
| scl000993.1   | 5-S     | -33.6008 | -1.48 | Eef1b2        | NM_018796.2 | Mus musculus eukaryotic translation elongation factor 1 beta 2 (Eef1b2), mRNA.                                      |
| scl00224133.1 | 32-S    | -33.4919 | -6.92 | Parp14        | NM_145481.1 |                                                                                                                     |
| scl0076142.2  | 55-S    | -33.4783 | -1.88 | Ppp1r14c      | NM_133485.1 | Mus musculus protein phosphatase 1, regulatory (inhibitor) subunit 14c (Ppp1r14c), mRNA.                            |
| scl015387.16  | 11-S    | -33.4783 | -4.69 | Hnrpk         | NM_025279.1 | Mus musculus heterogeneous nuclear ribonucleoprotein K (Hnrpk), mRNA.                                               |
| scl0002144.1  | 169-S   | -33.4482 | -2.3  | 0610031J06Rik | NM_020003.1 | Mus musculus RIKEN cDNA 0610031J06 gene (0610031J06Rik), mRNA.                                                      |
| scl0003000.1  | 3-S     | -33.4446 | -1.56 | Myl9          | XM_283793.2 | Mus musculus myosin, light polypeptide 9, regulatory (Myl9), mRNA.                                                  |
| scl0271005.13 | 174-S   | -33.3764 | -1.51 | Kihdc1        | NM_178253.2 | Mus musculus kelch domain containing 1 (Kihdc1), mRNA.                                                              |
| scl27818.30   | 1_7-S   | -33.351  | -1.36 | Anapc4        | NM_024213.1 | Mus musculus anaphase promoting complex subunit 4 (Anapc4), mRNA.                                                   |
| scl058239.1   | 71-S    | -33.3498 | -1.36 | Dexi          | NM_021428.3 | Mus musculus dexamethasone-induced transcript (Dexi), mRNA.                                                         |
| scl31806.5    | 1_30-S  | -33.3194 | -1.72 | 1500019G21Rik | NM_024172.2 | Mus musculus RIKEN cDNA 1500019G21 gene (1500019G21Rik), mRNA.                                                      |
| scl059069.6   | 0-S     | -33.2278 | -3.2  | Tpm3          | NM_022314   | Mus musculus tropomyosin 3, gamma (Tpm3), mRNA.                                                                     |
| scl0066999.2  | 129-S   | -33.2133 | -1.24 | 1500003D12Rik | NM_025895.2 | Mus musculus RIKEN cDNA 1500003D12 gene (1500003D12Rik), mRNA.                                                      |
| scl070356.1   | 235-S   | -33.1962 | -1.46 | St13          | NM_133726.1 | Mus musculus suppression of tumorigenicity 13 (St13), mRNA.                                                         |
| scl0014980.1  | 39-S    | -33.1572 | -1.38 | H2-L          |             |                                                                                                                     |
| scl31535.10   | 6_2-S   | -33.1473 | -1.35 | Capns1        | NM_009795   | Mus musculus calpain, small subunit 1 (Capns1), mRNA.                                                               |
| scl21752.24   | 8_3-S   | -33.1306 | -1.24 | Atp1a1        | NM_144900.1 | Mus musculus ATPase, Na+/K+ transporting, alpha 1 polypeptide (Atp1a1), mRNA.                                       |
| scl39991.5    | 43-S    | -33.0725 | -1.71 | Spag7         | NM_172561   | Mus musculus sperm associated antigen 7 (Spag7), mRNA.                                                              |
| scl056282.5   | 222-S   | -33.0351 | -1.25 | Mrp12         | NM_027204.2 | Mus musculus mitochondrial ribosomal protein L12 (Mrp12), mRNA.                                                     |
| scl030932.2   | 33-S    | -33.0268 | -1.75 | Zfp330        | NM_145600.1 | Mus musculus zinc finger protein 330 (Zfp330), mRNA.                                                                |
| scl23866.4    | 28-S    | -32.9906 | -1.84 | 2410166I05Rik | NM_029759.2 | Mus musculus RIKEN cDNA 2410166I05 gene (2410166I05Rik), mRNA.                                                      |
| scl0214572.8  | 7-S     | -32.8772 | -1.87 | BC006705      | NM_145404.1 | Mus musculus cDNA sequence BC006705 (BC006705), mRNA.                                                               |
| scl0018813.1  | 104-S   | -32.7612 | -1.89 | Pa2g4         | NM_011119.1 | Mus musculus proliferation-associated 2G4 (Pa2g4), mRNA.                                                            |
| scl0004139.1  | 41-S    | -32.6702 | -1.48 | Asrij         | NM_023429.2 | Mus musculus asrij protein (Asrij), mRNA.                                                                           |
| scl37470.5    | 1_23-S  | -32.6692 | -1.88 | Yeats4        | NM_026570.1 |                                                                                                                     |
| scl0245841.4  | 4-S     | -32.6572 | -2.14 | Polr2h        | NM_145632   | Mus musculus polymerase (RNA) II (DNA directed) polypeptide H (Polr2h), mRNA.                                       |
| scl014109.3   | 67-S    | -32.6553 | -1.31 | Fau           | NM_007990   | Mus musculus Finkel-Biskis-Reilly murine sarcoma virus (FBR-MuSV) ubiquitously expressed (fox derived) (Fau), mRNA. |
| scl020068.3   | 1-S     | -32.5713 | -1.26 | Rps17         | NM_009092.2 | Mus musculus ribosomal protein S17 (Rps17), mRNA.                                                                   |
| scl020462.9   | 41-S    | -32.4718 | -2.77 | Sfrs10        | NM_009186   | Mus musculus splicing factor, arginine/serine-rich 10 (transformer 2 homolog, Drosophila) (Sfrs10), mRNA.           |
| scl0050496.2  | 2-S     | -32.4251 | -4.41 | E2f6          | NM_033270.1 | Mus musculus E2F transcription factor 6 (E2f6), mRNA.                                                               |
| scl0003212.1  | 0-S     | -32.3238 | -3.57 | 2410003P15Rik | NM_018888.1 | Mus musculus RIKEN cDNA 2410003P15 gene (2410003P15Rik), mRNA.                                                      |
| scl0227292.12 | 53-S    | -32.306  | -1.36 | Ctdsp1        | NM_153088.1 | Mus musculus CTD (carboxy-terminal domain, RNA polymerase II, polypeptide A) small phosphatase 1 (Ctdsp1), mRNA.    |
| scl28746.7    | 64-S    | -32.1761 | -1.27 | 2610209M04Rik | NM_025665.1 | Mus musculus RIKEN cDNA 2610209M04 gene (2610209M04Rik), mRNA.                                                      |
| scl0003459.1  | 490-S   | -32.0496 | -2.31 | Lrrfp2        | XM_284541.1 | Mus musculus leucine rich repeat (in FLII) interacting protein 2 (Lrrfp2), mRNA.                                    |
| scl32844.9    | 1_17-S  | -32.0055 | -1.34 | 9430029K10Rik | XM_284281.2 | Mus musculus RIKEN cDNA 9430029K10 gene (9430029K10Rik), mRNA.                                                      |
| scl068349.3   | 1-S     | -31.9666 | -1.23 | Ndufs3        | XM_130347.1 | Mus musculus NADH dehydrogenase (ubiquinone) Fe-S protein 3 (Ndufs3), mRNA.                                         |
| scl075608.7   | 106-S   | -31.9231 | -1.35 | 2010012F05Rik | NM_029362   | Mus musculus RIKEN cDNA 2010012F05 gene (2010012F05Rik), mRNA.                                                      |
| scl26327.26   | 63_55-S | -31.9076 | -2.98 | Sec311        | XM_132230.3 |                                                                                                                     |
| scl0002293.1  | 7-S     | -31.9065 | -3.29 | Sfrs5         | NM_009159   | Mus musculus splicing factor, arginine/serine-rich 5 (SRp40, HRS) (Sfrs5), mRNA.                                    |
| scl057808.2   | 82-S    | -31.8889 | -1.34 | Rpl35a        | NM_021338.2 | Mus musculus ribosomal protein L35a (Rpl35a), mRNA.                                                                 |
| scl0002298.1  | 37-S    | -31.884  | -2.79 | Coq6          | NM_172582.1 | Mus musculus coenzyme Q6 homolog (yeast) (Coq6), mRNA.                                                              |
| scl0002171.1  | 4-S     | -31.8533 | -1.61 | Sra1          | NM_025291.1 | Mus musculus steroid receptor RNA activator 1 (Sra1), mRNA.                                                         |
| scl17782.7    | 1_158-S | -31.7666 | -3.06 | 1110060O18Rik | NM_026846.1 | Mus musculus RIKEN cDNA 1110060O18 gene (1110060O18Rik), mRNA.                                                      |
| scl49028.27   | 379-S   | -31.7302 | -3.31 | 2810413I22Rik | NM_025483.2 | Mus musculus RIKEN cDNA 2810413I22 gene (2810413I22Rik), mRNA.                                                      |
| scl18868.1    | 64_1-S  | -31.6926 | -5.46 | 2610318K02Rik | NM_026519.1 | Mus musculus RIKEN cDNA 2610318K02 gene (2610318K02Rik), mRNA.                                                      |
| scl0002678.1  | 34-S    | -31.5804 | -1.41 | Magoh         | NM_010760.1 | Mus musculus mago-nashi homolog, proliferation-associated (Drosophila) (Magoh), mRNA.                               |
| scl39347.7    | 18_70-S | -31.4705 | -5.61 | 1110028N05Rik | NM_025400.2 | Mus musculus RIKEN cDNA 1110028N05 gene (1110028N05Rik), mRNA.                                                      |
| scl00228410.1 | 260-S   | -31.4418 | -1.94 | Cstf3         | NM_145529.1 | Mus musculus cleavage stimulation factor, 3 pre-RNA, subunit 3 (Cstf3), mRNA.                                       |
| scl33261.5    | 41-S    | -31.4183 | -1.25 | Hsbp1         | NM_024219.1 | Mus musculus heat shock factor binding protein 1 (Hsbp1), mRNA.                                                     |
| scl0002404.1  | 3-S     | -31.3392 | -2.85 | Cif2          | NM_007688.1 | Mus musculus cofilin 2, muscle (Cif2), mRNA.                                                                        |
| scl000908.1   | 4-S     | -31.3374 | -2.92 | Hes6          | NM_019479.2 | Mus musculus hairy and enhancer of split 6 (Drosophila) (Hes6), mRNA.                                               |
| scl083456.10  | 6-S     | -31.303  | -1.37 | Mov10l1       | NM_031260.1 | Mus musculus Moloney leukemia virus 10-like 1 (Mov10l1), mRNA.                                                      |

|                |       |          |       |               |             |                                                                                                                                               |
|----------------|-------|----------|-------|---------------|-------------|-----------------------------------------------------------------------------------------------------------------------------------------------|
| scI0003746.1   | 25-S  | -31.2813 | -3.79 | Gdi3          | NM_008112.2 | Mus musculus guanosine diphosphate (GDP) dissociation inhibitor 3 (Gdi3), mRNA.                                                               |
| scI44625.4     | 223-S | -31.2677 | -7.64 | 2900041A09Rik | NM_182839.1 | Mus musculus RIKEN cDNA 2900041A09 gene (2900041A09Rik), mRNA.                                                                                |
| scI0053607.2   | 231-S | -31.2633 | -2.08 | Snrpa         | NM_015782.2 | Mus musculus small nuclear ribonucleoprotein polypeptide A (Snrpa), mRNA.                                                                     |
| scI0012476.2   | 68-S  | -31.2112 | -1.23 | Cd151         | NM_009842.1 | Mus musculus CD151 antigen (Cd151), mRNA.                                                                                                     |
| scI0001595.1   | 53-S  | -31.2008 | -1.31 | 9530058B02Rik | NM_026633.1 | Mus musculus RIKEN cDNA 9530058B02 gene (9530058B02Rik), mRNA.                                                                                |
| scI00209630.2  | 217-S | -31.1998 | -1.39 | Frd4a         | NM_172475.2 |                                                                                                                                               |
| scI25931.11.1  | 56-S  | -31.1757 | -1.48 | Wbscr22       | NM_025375.1 | Mus musculus Williams Beuren syndrome chromosome region 22 (Wbscr22), mRNA.                                                                   |
| scI013806.12   | 49-S  | -31.1469 | -1.63 | Eno1          | NM_023119   | Mus musculus enolase 1, alpha non-neuron (Eno1), mRNA.                                                                                        |
| scI0002924.1   | 11-S  | -31.0389 | -3    | Psm10         | NM_016883.3 | Mus musculus proteasome (prosome, macropain) 26S subunit, non-ATPase, 10 (Psm10), mRNA.                                                       |
| scI0110557.2   | 204-S | -31.012  | -1.74 | H2-Q6         | NM_207648   | Mus musculus histocompatibility 2, Q region locus 6 (H2-Q6), mRNA.                                                                            |
| scI53686.6.11  | 16-S  | -30.9648 | -1.27 | Prdx4         | NM_016764.1 | Mus musculus peroxiredoxin 4 (Prdx4), mRNA.                                                                                                   |
| scI47965.12.3  | 6-S   | -30.9623 | -1.31 | Atp6v1c1      | NM_025494   | Mus musculus ATPase, H+ transporting, V1 subunit C, isoform 1 (Atp6v1c1), mRNA.                                                               |
| scI0066511.2   | 242-S | -30.9356 | -1.23 | 2500003M10Rik | NM_023215.3 | Mus musculus RIKEN cDNA 2500003M10 gene (2500003M10Rik), mRNA.                                                                                |
| scI0003288.1   | 26-S  | -30.9108 | -1.87 | 2410003P15Rik | NM_018888   | Mus musculus RIKEN cDNA 2410003P15 gene (2410003P15Rik), mRNA.                                                                                |
| scI0001537.1   | 132-S | -30.8847 | -5.42 | Rtn4          | NM_194054.1 | Mus musculus reticulon 4 (Rtn4), transcript variant 5, mRNA.                                                                                  |
| scI076073.9    | 113-S | -30.8574 | -1.31 | 0610009F02Rik | NM_029508.1 |                                                                                                                                               |
| scI47039.3.1   | 28-S  | -30.8202 | -2.66 | Fbxl6         | NM_013909.1 | Mus musculus F-box and leucine-rich repeat protein 6 (Fbxl6), mRNA.                                                                           |
| scI000481.1    | 29-S  | -30.808  | -1.51 | 5330431N19Rik | NM_172639.1 | Mus musculus RIKEN cDNA 5330431N19 gene (5330431N19Rik), mRNA.                                                                                |
| scI0074006.2   | 261-S | -30.7741 | -2.92 | Dnm1l         | NM_152816.1 | Mus musculus dynamin 1-like (Dnm1l), mRNA.                                                                                                    |
| scI44632.16.1  | 30-S  | -30.7696 | -1.26 | C130052I12Rik | NM_146047.1 | Mus musculus RIKEN cDNA C130052I12 gene (C130052I12Rik), mRNA.                                                                                |
| scI53554.5.129 | 30-S  | -30.5857 | -1.76 | Bad           | NM_007522.1 | Mus musculus Bcl-associated death promoter (Bad), mRNA.                                                                                       |
| scI020463.2    | 41-S  | -30.5523 | -1.3  | Cox7a2l       | XM_123188.1 | Mus musculus cytochrome c oxidase subunit VIIa polypeptide 2-like (Cox7a2l), mRNA.                                                            |
| scI34412.1     | 2-S   | -30.5377 | -6.51 | C76566        | NM_178879.2 | Mus musculus expressed sequence C76566 (C76566), mRNA.                                                                                        |
| scI070544.3    | 53-S  | -30.5236 | -1.31 | 5730437N04Rik | NM_027457.2 | Mus musculus RIKEN cDNA 5730437N04 gene (5730437N04Rik), mRNA.                                                                                |
| scI31678.22.1  | 32-S  | -30.4513 | -1.72 | Sfrs16        | NM_016680   | Mus musculus splicing factor, arginine/serine-rich 16 (suppressor-of-white-apricot homolog, Drosophila) (Sfrs16), transcript variant L, mRNA. |
| scI42371.18.1  | 30-S  | -30.4108 | -1.71 | Pygl          | NM_133198.1 | Mus musculus liver glycogen phosphorylase (Pygl), mRNA.                                                                                       |
| scI52252.1.58  | 3-S   | -30.341  | -1.45 | Snrpd1        | NM_009226.2 | Mus musculus small nuclear ribonucleoprotein D1 (Snrpd1), mRNA.                                                                               |
| scI41883.7.1   | 5-S   | -30.2258 | -1.99 | 2610510L01Rik | NM_026015.1 | Mus musculus RIKEN cDNA 2610510L01 gene (2610510L01Rik), mRNA.                                                                                |
| scI0019087.2   | 280-S | -30.2203 | -1.42 | Prkar2a       | NM_008924.1 | Mus musculus protein kinase, cAMP dependent regulatory, type II alpha (Prkar2a), mRNA.                                                        |
| scI52826.3.1   | 11-S  | -30.0898 | -1.4  | Mrpl11        | NM_025553.1 | Mus musculus mitochondrial ribosomal protein L11 (Mrpl11), mRNA.                                                                              |
| scI066212.2    | 13-S  | -30.0486 | -2.23 | Sec61b        | NM_024171   | Mus musculus Sec61 beta subunit (Sec61b), mRNA.                                                                                               |
| scI21970.4.1   | 6-S   | -30.0288 | -1.27 | Mapbpip       | NM_031248.3 | Mus musculus mitogen activated protein binding protein interacting protein (Mapbpip), mRNA.                                                   |
| scI42999.15.1  | 85-S  | -29.9403 | -1.95 | Wdr21         | NM_030246.1 | Mus musculus WD repeat domain 21 (Wdr21), mRNA.                                                                                               |
| scI0054473.2   | 162-S | -29.9387 | -1.27 | Tollip        | NM_023764.2 | Mus musculus toll interacting protein (Tollip), mRNA.                                                                                         |
| scI38698.8     | 214-S | -29.9047 | -1.4  | Cnn2          | NM_007725.1 | Mus musculus calponin 2 (Cnn2), mRNA.                                                                                                         |
| scI018032.3    | 14-S  | -29.8982 | -1.24 | Nfix          | NM_010906.1 | Mus musculus nuclear factor I/X (Nfix), mRNA.                                                                                                 |
| scI0105083.1   | 137-S | -29.8804 | -1.66 | Pelo          | NM_134058.1 | Mus musculus pelota homolog (Drosophila) (Pelo), mRNA.                                                                                        |
| scI000538.1    | 65-S  | -29.8799 | -1.44 | Banf1         | NM_011793.2 | Mus musculus barrier to autointegration factor 1 (Banf1), mRNA.                                                                               |
| scI068240.2    | 29-S  | -29.8022 | -1.56 | Rpa3          | NM_026632.1 | Mus musculus replication protein A3 (Rpa3), mRNA.                                                                                             |
| scI0021417.2   | 96-S  | -29.7692 | -1.34 | Zfmx1a        | NM_011546.1 | Mus musculus zinc finger homeobox 1a (Zfmx1a), mRNA.                                                                                          |
| scI0110196.3   | 64-S  | -29.7293 | -1.35 | Fdps          | NM_134469.2 | Mus musculus farnesyl diphosphate synthetase (Fdps), mRNA.                                                                                    |
| scI19160.22    | 222-S | -29.6984 | -1.32 | Tlk1          | NM_172664.2 | Mus musculus tousled-like kinase 1 (Tlk1), mRNA.                                                                                              |
| scI0001446.1   | 126-S | -29.6373 | -1.82 | Gosr2         | NM_019650.2 | Mus musculus golgi SNAP receptor complex member 2 (Gosr2), mRNA.                                                                              |
| scI43941.6     | 46-S  | -29.6035 | -1.68 | Cltb          | NM_028870.1 | Mus musculus clathrin, light polypeptide (Lcb) (Cltb), mRNA.                                                                                  |
| scI021770.4    | 4-S   | -29.5972 | -1.57 | Ppp2r5d       | NM_009358.2 | Mus musculus protein phosphatase 2, regulatory subunit B (B56), delta isoform (Ppp2r5d), mRNA.                                                |
| scI27205.18    | 385-S | -29.5963 | -2.76 | Aacs          | NM_030210.1 | Mus musculus acetoacetyl-CoA synthetase (Aacs), mRNA.                                                                                         |
| scI0001479.1   | 77-S  | -29.5316 | -1.27 | Ccng1         | NM_009831.1 | Mus musculus cyclin G1 (Ccng1), mRNA.                                                                                                         |
| scI41258.12    | 129-S | -29.5294 | -1.49 | Pitpn         | NM_008850.1 | Mus musculus phosphatidylinositol transfer protein (Pitpn), mRNA.                                                                             |
| scI015526.3    | 30-S  | -29.5087 | -1.26 | Hspa9a        | NM_010481.1 | Mus musculus heat shock protein, A (Hspa9a), mRNA.                                                                                            |
| scI16516.6.1   | 29-S  | -29.4965 | -1.45 | Pde6d         | NM_008801.2 | Mus musculus phosphodiesterase 6D, cGMP-specific, rod, delta (Pde6d), mRNA.                                                                   |
| scI0002784.1   | 2-S   | -29.4611 | -5.57 | Dnajc11       | NM_172704.1 |                                                                                                                                               |
| scI0066226.1   | 62-S  | -29.431  | -1.72 | Trappc2       | NM_025432   | Mus musculus trafficking protein particle complex 2 (Trappc2), mRNA.                                                                          |
| scI48818.18.1  | 43-S  | -29.4168 | -1.29 | Trap1         | NM_026508.1 |                                                                                                                                               |
| scI0066878.2   | 2-S   | -29.3229 | -1.27 | RioK3         | NM_024182.2 | Mus musculus RIO kinase 3 (yeast) (RioK3), mRNA.                                                                                              |
| scI000898.1    | 12-S  | -29.3105 | -1.55 | Ivns1abp      | NM_054102.1 | Mus musculus influenza virus NS1A binding protein (Ivns1abp), mRNA.                                                                           |
| scI00223254.1  | 50-S  | -29.2756 | -5.11 | Farp1         | XM_127877.4 | Mus musculus FERM, RhoGEF (Arhgef) and pleckstrin domain protein 1 (chondrocyte-derived) (Farp1), mRNA.                                       |

|                        |          |       |               |             |                                                                                                                               |
|------------------------|----------|-------|---------------|-------------|-------------------------------------------------------------------------------------------------------------------------------|
| sci050916.6 54-S       | -29.2196 | -6.51 | Irx4          | NM_018885.1 | Mus musculus Iroquois related homeobox 4 (Drosophila) (Irx4), mRNA.                                                           |
| sci20894.20.1 21-S     | -29.1965 | -2.41 | Pkp4          | XM_130277.3 | Mus musculus plakophilin 4 (Pkp4), mRNA.                                                                                      |
| sci011773.12_12 241-S  | -29.1897 | -1.3  | Ap2m1         | NM_009679.1 | Mus musculus adaptor protein complex AP-2, mu1 (Ap2m1), mRNA.                                                                 |
| sci0001229.1 5-S       | -29.1792 | -1.47 | Camk1         | NM_133926.1 | Mus musculus calcium/calmodulin-dependent protein kinase I (Camk1), mRNA.                                                     |
| sci066231.1 52-S       | -29.1371 | -1.26 | 1500006O09Rik | XM_147163.1 | Mus musculus RIKEN cDNA 1500006O09 gene (1500006O09Rik), mRNA.                                                                |
| sci0001763.1 85-S      | -29.0305 | -2.79 | Slc35b1       | XM_128634.4 | Mus musculus solute carrier family 35, member B1 (Slc35b1), mRNA.                                                             |
| sci0003647.1 892-S     | -29.0043 | -1.39 | Sptlc1        | NM_009269.2 | Mus musculus serine palmitoyltransferase, long chain base subunit 1 (Sptlc1), mRNA.                                           |
| sci0002486.1 42-S      | -28.9377 | -5.53 | Myg1          | NM_021713.1 | Mus musculus melanocyte proliferating gene 1 (Myg1), mRNA.                                                                    |
| sci0067374.1 279-S     | -28.881  | -1.95 | Jam2          | NM_023844.2 | Mus musculus junction adhesion molecule 2 (Jam2), mRNA.                                                                       |
| sci0001563.1 89-S      | -28.8396 | -2.09 | Spnb2         | NM_175836.1 | Mus musculus spectrin beta 2 (Spnb2), transcript variant 1, mRNA.                                                             |
| sci46277.2.1 30-S      | -28.775  | -2.13 | 1110028A07Rik | NM_026808.1 | Mus musculus RIKEN cDNA 1110028A07 gene (1110028A07Rik), mRNA.                                                                |
| sci40175.7.1 79-S      | -28.7358 | -1.24 | Obscn         | XM_126461.3 |                                                                                                                               |
| sci0072098.1 29-S      | -28.7353 | -1.48 | 2010300G19Rik | NM_028097.2 | Mus musculus RIKEN cDNA 2010300G19 gene (2010300G19Rik), mRNA.                                                                |
| sci066366.11 67-S      | -28.7338 | -1.4  | Sdbcag84      | NM_025516.2 | Mus musculus serologically defined breast cancer antigen 84 (Sdbcag84), mRNA.                                                 |
| sci000125.1 16-S       | -28.6864 | -6.26 | Snrp70        | NM_009224.2 | Mus musculus U1 small nuclear ribonucleoprotein polypeptide A (Snrp70), mRNA.                                                 |
| sci18999.2.2 47-S      | -28.6137 | -2.45 | 1700030A21Rik | NM_026992.1 | Mus musculus RIKEN cDNA 1700030A21 gene (1700030A21Rik), mRNA.                                                                |
| sci021922.2 0-S        | -28.5928 | -2.87 | Tna           | XM_147338.1 | Mus musculus tetranectin (plasminogen binding protein) (Tna), mRNA.                                                           |
| sci38191.11.1 70-S     | -28.5737 | -2.14 | 2610020N02Rik | NM_181470.2 | Mus musculus RIKEN cDNA 2610020N02 gene (2610020N02Rik), mRNA.                                                                |
| sci34173.5 8-S         | -28.5588 | -1.54 | Egln1         | NM_053207.1 | Mus musculus EGL nine homolog 1 (C. elegans) (Egln1), mRNA.                                                                   |
| sci000928.1 86-S       | -28.5088 | -2.97 | Hspd1         | NM_010477.2 | Mus musculus heat shock protein 1 (chaperonin) (Hspd1), mRNA.                                                                 |
| sci15839.11.1 64-S     | -28.5078 | -1.28 | Ephx1         | NM_010145.2 | Mus musculus epoxide hydrolase 1, microsomal (Ephx1), mRNA.                                                                   |
| sci37735.5.1 7-S       | -28.4925 | -1.79 | Mbd3          | NM_013595.1 | Mus musculus methyl-CpG binding domain protein 3 (Mbd3), mRNA.                                                                |
| sci0017257.1 80-S      | -28.4213 | -2.22 | Mecp2         | NM_010788.1 | Mus musculus methyl CpG binding protein 2 (Mecp2), mRNA.                                                                      |
| sci068020.5 23-S       | -28.36   | -1.46 | 2810002N01Rik | NM_026511.1 | Mus musculus RIKEN cDNA 2810002N01 gene (2810002N01Rik), mRNA.                                                                |
| sci056550.9 27-S       | -28.2736 | -1.25 | Ube2d2        | NM_019912.1 | Mus musculus ubiquitin-conjugating enzyme E2D 2 (Ube2d2), mRNA.                                                               |
| sci32012.1.1 330-S     | -28.2276 | -5.92 | B230325K18Rik | NM_176936.2 | Mus musculus RIKEN cDNA B230325K18 gene (B230325K18Rik), mRNA.                                                                |
| sci39939.4 200-S       | -28.2074 | -2.07 | Hic1          | NM_010430.1 | Mus musculus hypermethylated in cancer 1 (Hic1), mRNA.                                                                        |
| sci0066827.2 11-S      | -28.1324 | -1.27 | Ttc1          | NM_133795.1 | Mus musculus tetrapeptide repeat domain 1 (Ttc1), mRNA.                                                                       |
| gi_32129296_ref NM_003 | -28.1251 | -1.39 | Rpl13a        | NM_009438.3 | Mus musculus ribosomal protein L13a (Rpl13a), mRNA.                                                                           |
| sci0012514.2 91-S      | -28.1143 | -4.46 | Cd68          | NM_009853.1 | Mus musculus CD68 antigen (Cd68), mRNA.                                                                                       |
| sci021859.7 4-S        | -28.0962 | -2.26 | Timp3         | NM_011595.1 | Mus musculus tissue inhibitor of metalloproteinase 3 (Timp3), mRNA.                                                           |
| sci20390.11.1 18-S     | -28.0251 | -1.75 | Ccnbbp1       | NM_010761.1 | Mus musculus cyclin D-type binding-protein 1 (Ccnbbp1), mRNA.                                                                 |
| sci21129.4 153-S       | -28.0067 | -2    | Mrps2         | NM_080452.2 | Mus musculus mitochondrial ribosomal protein S2 (Mrps2), mRNA.                                                                |
| sci0011564.2 163-S     | -27.9387 | -1.29 | Adsl          | NM_009634.3 | Mus musculus adenylosuccinate lyase (Adsl), mRNA.                                                                             |
| sci000238.1 112-S      | -27.9226 | -3.95 | Stard10       | NM_019990.1 | Mus musculus START domain containing 10 (Stard10), mRNA.                                                                      |
| sci52418.9.1 3-S       | -27.9146 | -1.93 | Kcnip2        | NM_145703.1 | Mus musculus Kv channel-interacting protein 2 (Kcnip2), mRNA.                                                                 |
| sci0003604.1 30-S      | -27.847  | -1.27 | Efta          | NM_145615.2 | Mus musculus electron transferring flavoprotein, alpha polypeptide (Efta), nuclear gene encoding mitochondrial protein, mRNA. |
| sci23689.13.5 3-S      | -27.8164 | -1.44 | Extl1         | NM_019578   | Mus musculus exostosin (multiple)-like 1 (Extl1), mRNA.                                                                       |
| sci48378.7.7 6-S       | -27.8138 | -1.64 | Nit2          | NM_023175.1 |                                                                                                                               |
| sci000719.1 1-S        | -27.7769 | -2    | 5033428A16Rik | XM_356102.1 |                                                                                                                               |
| sci35682.17.1 6-S      | -27.7188 | -1.33 | Snx1          | NM_019727.1 | Mus musculus sorting nexin 1 (Snx1), mRNA.                                                                                    |
| sci16334.7.1 2-S       | -27.5796 | -3.37 | Dars          | NM_145507.1 | Mus musculus aspartyl-tRNA synthetase (Dars), mRNA.                                                                           |
| sci0001304.1 8-S       | -27.5312 | -3.22 | 4930579A11Rik | NM_029478.2 | Mus musculus RIKEN cDNA 4930579A11 gene (4930579A11Rik), mRNA.                                                                |
| sci0016905.1 7-S       | -27.5118 | -1.32 | Lmna          | NM_019390.1 | Mus musculus lamin A (Lmna), mRNA.                                                                                            |
| sci45193.8 18-S        | -27.4653 | -1.34 | Ednrb         | NM_007904.2 | Mus musculus endothelin receptor type B (Ednrb), mRNA.                                                                        |
| sci000989.1 15-S       | -27.4585 | -4.13 | sty           | U21209      |                                                                                                                               |
| sci50794.7.1 43-S      | -27.397  | -1.34 | Clc1          | NM_033444.1 | Mus musculus chloride intracellular channel 1 (Clc1), mRNA.                                                                   |
| sci33440.8 211-S       | -27.3793 | -1.93 | Ckifsf3       | NM_024217.2 | Mus musculus chemokine-like factor super family 3 (Ckifsf3), mRNA.                                                            |
| sci47677.6.2 17-S      | -27.3465 | -1.31 | Bzrp          | NM_009775.2 | Mus musculus benzodiazepine receptor, peripheral (Bzrp), mRNA.                                                                |
| sci17433.3.1 30-S      | -27.3259 | -1.54 | Phlda3        | NM_013750.1 | Mus musculus pleckstrin homology-like domain, family A, member 3 (Phlda3), mRNA.                                              |
| sci15945.4.1 0-S       | -27.2995 | -1.25 | 1110021H02Rik | NM_025388.1 | Mus musculus RIKEN cDNA 1110021H02 gene (1110021H02Rik), mRNA.                                                                |
| sci0001825.1 141-S     | -27.2911 | -4    | A2bp1         | NM_183188   | Mus musculus ataxin 2 binding protein 1 (A2bp1), transcript variant 2, mRNA.                                                  |
| sci013629.6 24-S       | -27.2716 | -2.42 | Eef2          | NM_007907.1 | Mus musculus eukaryotic translation elongation factor 2 (Eef2), mRNA.                                                         |
| sci066495.2 23-S       | -27.2696 | -1.2  | Ndubf3        | NM_025597.1 | Mus musculus NADH dehydrogenase (ubiquinone) 1 beta subcomplex 3 (Ndubf3), mRNA.                                              |
| sci33620.26.1 275-S    | -27.2513 | -2.76 | Inpp4b        | XM_134427.3 |                                                                                                                               |
| sci22797.19 196-S      | -27.246  | -1.2  | D3Jfr1        | NM_144901.2 | Mus musculus DNA segment, Chr 3, MJeffers 1 (D3Jfr1), mRNA.                                                                   |



|               |          |          |       |               |             |                                                                                                                                         |
|---------------|----------|----------|-------|---------------|-------------|-----------------------------------------------------------------------------------------------------------------------------------------|
| scl44709.8    | 227-S    | -27.2416 | -1.31 | Smad5         | NM_008541.2 |                                                                                                                                         |
| scl00319263.2 | 23-S     | -27.2208 | -1.27 | A030012M09Rik | NM_183028.1 | Mus musculus RIKEN cDNA A030012M09 gene (A030012M09Rik), mRNA.                                                                          |
| scl0020677.2  | 120-S    | -27.2156 | -2.01 | Sox4          | NM_009238.1 | Mus musculus SRY-box containing gene 4 (Sox4), mRNA.                                                                                    |
| scl0003185.1  | 157-S    | -26.9813 | -5.04 | Crat          | NM_007760   | Mus musculus carnitine acetyltransferase (Crat), mRNA.                                                                                  |
| scl31469.3    | 28_7-S   | -26.9579 | -1.31 | D7Rp2e        | NM_033080.1 | Mus musculus DNA segment, Chr 7, Roswell Park 2 complex, expressed (D7Rp2e), mRNA.                                                      |
| scl23113.7    | 10-S     | -26.9257 | -1.54 | Mif1          | NM_010801.1 | Mus musculus myeloid leukemia factor 1 (Mif1), mRNA.                                                                                    |
| scl0326618.9  | 77-S     | -26.9087 | -1.5  | Tpm4          | XM_134274.3 |                                                                                                                                         |
| scl099683.1   | 9-S      | -26.8777 | -1.48 | Sec24b        | XM_131192.5 |                                                                                                                                         |
| scl51823.8    | 1_71-S   | -26.8414 | -1.4  | Tnfsf5ip1     | NM_134138.1 | Mus musculus tumor necrosis factor superfamily, member 5-induced protein 1 (Tnfsf5ip1), mRNA.                                           |
| scl0105245.1  | 201-S    | -26.8181 | -1.43 | Txndc5        | NM_145367.2 | Mus musculus thioredoxin domain containing 5 (Txndc5), mRNA.                                                                            |
| scl013063.3   | 11-S     | -26.7983 | -1.19 | Cycs          | NM_007808.2 | Mus musculus cytochrome c, somatic (Cycs), mRNA.                                                                                        |
| scl052469.1   | 143-S    | -26.7931 | -1.24 | D11Ert99e     | NM_026618.1 | Mus musculus DNA segment, Chr 11, ERATO Doi 99, expressed (D11Ert99e), mRNA.                                                            |
| scl0071448.2  | 44-S     | -26.7628 | -2.69 | 5530601119Rik | NM_027797.1 | Mus musculus RIKEN cDNA 5530601119 gene (5530601119Rik), mRNA.                                                                          |
| scl068035.2   | 9-S      | -26.7301 | -1.8  | 3100004P22Rik | NM_133693.1 | Mus musculus RIKEN cDNA 3100004P22 gene (3100004P22Rik), mRNA.                                                                          |
| scl000768.1   | 18-S     | -26.7131 | -1.61 | 5230400G24Rik | NM_029409.2 | Mus musculus RIKEN cDNA 5230400G24 gene (5230400G24Rik), mRNA.                                                                          |
| scl17725.6    | 585-S    | -26.6535 | -1.3  | Itm2c         | NM_022417.1 | Mus musculus integral membrane protein 2C (Itm2c), mRNA.                                                                                |
| scl0065970.2  | 260-S    | -26.653  | -1.43 | D15Ert366e    | NM_023063.1 | Mus musculus DNA segment, Chr 15, ERATO Doi 366, expressed (D15Ert366e), mRNA.                                                          |
| scl35076.15   | 19-S     | -26.6338 | -1.3  | Gas6          | NM_019521.1 | Mus musculus growth arrest specific 6 (Gas6), mRNA.                                                                                     |
| scl0016179.2  | 78-S     | -26.5191 | -1.59 | Irak1         | NM_008363.1 | Mus musculus interleukin-1 receptor-associated kinase 1 (Irak1), mRNA.                                                                  |
| scl31908.3    | 1_71-S   | -26.4554 | -1.61 | Ryd5          | XM_355976.1 |                                                                                                                                         |
| scl0072981.1  | 92-S     | -26.4449 | -1.42 | Prkrir        | NM_028410.1 | Mus musculus protein-kinase, interferon-inducible double stranded RNA dependent inhibitor, repressor of (P58 repressor) (Prkrir), mRNA. |
| scl0011307.2  | 72-S     | -26.4299 | -2.27 | Abcg1         | NM_009593.1 | Mus musculus ATP-binding cassette, sub-family G (WHITE), member 1 (Abcg1), mRNA.                                                        |
| scl0013822.2  | 330-S    | -26.4229 | -2.23 | Epb4.1l2      | NM_013511.1 | Mus musculus erythrocyte protein band 4.1-like 2 (Epb4.1l2), mRNA.                                                                      |
| scl020382.2   | 66-S     | -26.4088 | -1.26 | Sfrs2         | NM_011358.1 | Mus musculus splicing factor, arginine/serine-rich 2 (SC-35) (Sfrs2), mRNA.                                                             |
| scl000794.1   | 5-S      | -26.4079 | -1.32 | Tsn           | NM_011650.2 | Mus musculus translin (Tsn), mRNA.                                                                                                      |
| scl35096.10   | 154-S    | -26.4014 | -1.45 | Ankrd10       | NM_133971.1 | Mus musculus ankyrin repeat domain 10 (Ankrd10), mRNA.                                                                                  |
| scl0067433.1  | 155-S    | -26.392  | -1.36 | 0610011N22Rik | NM_024201.2 | Mus musculus RIKEN cDNA 0610011N22 gene (0610011N22Rik), mRNA.                                                                          |
| scl48775.5    | 265-S    | -26.264  | -1.31 | Emp2          | NM_007929.1 | Mus musculus epithelial membrane protein 2 (Emp2), mRNA.                                                                                |
| scl057321.4   | 17-S     | -26.2153 | -1.51 | Terf2ip       | NM_020584.1 | Mus musculus telomeric repeat binding factor 2, interacting protein (Terf2ip), mRNA.                                                    |
| scl53255.10   | 1_6-S    | -26.2121 | -1.29 | D330024H06Rik | NM_181404.3 | Mus musculus RIKEN cDNA D330024H06 gene (D330024H06Rik), mRNA.                                                                          |
| scl42057.12   | 19-S     | -26.1605 | -1.33 | Wars          | NM_011710.2 | Mus musculus tryptophanyl-tRNA synthetase (Wars), mRNA.                                                                                 |
| scl0077683.1  | 104-S    | -26.1211 | -3.21 | Ehmt1         | NM_172545.1 |                                                                                                                                         |
| scl0003607.1  | 28-S     | -26.1175 | -1.38 | Il1r1l        | NM_010744.1 | Mus musculus interleukin 1 receptor-like 1 ligand (Il1r1l), mRNA.                                                                       |
| scl012443.1   | 0-S      | -26.1066 | -2.96 | Ccnd1         | NM_007631.1 | Mus musculus cyclin D1 (Ccnd1), mRNA.                                                                                                   |
| scl49852.7    | 79-S     | -26.0186 | -2.39 | 1600025D17Rik | NM_028065   |                                                                                                                                         |
| scl49273.6    | 155-S    | -25.9767 | -2.38 | Hrasls        | NM_013751.3 | Mus musculus HRAS-like suppressor (Hrasls), mRNA.                                                                                       |
| scl49970.18   | 121_17-S | -25.9473 | -1.61 | Abcf1         | NM_013854.1 | Mus musculus ATP-binding cassette, sub-family F (GCN20), member 1 (Abcf1), mRNA.                                                        |
| scl39557.17   | 1_8-S    | -25.9014 | -1.28 | Dnajc7        | NM_019795.3 | Mus musculus DnaJ (Hsp40) homolog, subfamily C, member 7 (Dnajc7), mRNA.                                                                |
| scl0002267.1  | 458-S    | -25.8235 | -5.12 | Osbpl1a       | NM_020573.1 | Mus musculus oxysterol binding protein-like 1A (Osbpl1a), mRNA.                                                                         |
| scl0012226.2  | 9-S      | -25.8196 | -2.21 | Btg1          | NM_007569.1 | Mus musculus B-cell translocation gene 1, anti-proliferative (Btg1), mRNA.                                                              |
| scl068794.13  | 69-S     | -25.7897 | -1.21 | 1110055E19Rik | XM_284175.2 | Mus musculus RIKEN cDNA 1110055E19 gene (1110055E19Rik), mRNA.                                                                          |
| scl0001102.1  | 1-S      | -25.7771 | -1.31 | Suclg1        | NM_019879.1 | Mus musculus succinate-CoA ligase, GDP-forming, alpha subunit (Suclg1), mRNA.                                                           |
| scl0003102.1  | 1-S      | -25.7678 | -1.37 | Map1lc3a      | NM_025735.1 | Mus musculus microtubule-associated protein 1 light chain 3 alpha (Map1lc3a), mRNA.                                                     |
| scl21185.13   | 1_16-S   | -25.7362 | -1.29 | Anapc2        | NM_175300.2 | Mus musculus anaphase promoting complex subunit 2 (Anapc2), mRNA.                                                                       |
| scl000184.1   | 1-S      | -25.7137 | -6.01 | Sec23ip       | XM_133737.4 | Mus musculus Sec23 interacting protein (Sec23ip), mRNA.                                                                                 |
| scl0023828.2  | 1-S      | -25.7008 | -1.25 | Bves          | NM_024285.1 | Mus musculus blood vessel epicardial substance (Bves), mRNA.                                                                            |
| scl0013685.1  | 134-S    | -25.6871 | -3.49 | Eif4ebp1      | NM_007918.2 | Mus musculus eukaryotic translation initiation factor 4E binding protein 1 (Eif4ebp1), mRNA.                                            |
| scl24435.7    | 6_19-S   | -25.6625 | -1.68 | Smu1          | NM_021535.2 |                                                                                                                                         |
| scl23202.2    | 5-S      | -25.6601 | -4.29 | 2810489O06Rik | NM_175386.3 | Mus musculus RIKEN cDNA 2810489O06 gene (2810489O06Rik), mRNA.                                                                          |
| scl39392.13   | 1_3-S    | -25.6398 | -1.22 | D11Ert498e    | NM_145940.1 | Mus musculus DNA segment, Chr 11, ERATO Doi 498, expressed (D11Ert498e), mRNA.                                                          |
| scl0003895.1  | 38-S     | -25.5927 | -1.27 | Myf6          | NM_010860   | Mus musculus myosin, light polypeptide 6, alkali, smooth muscle and non-muscle (Myf6), mRNA.                                            |
| scl54430.4    | 1_35-S   | -25.5916 | -1.39 | Ebp           | NM_007898.2 | Mus musculus phenylalkylamine Ca2+ antagonist (emopamil) binding protein (Ebp), mRNA.                                                   |
| scl0001036.1  | 14-S     | -25.5835 | -4.92 | 0610006O14Rik | NM_133764.1 | Mus musculus RIKEN cDNA 0610006O14 gene (0610006O14Rik), mRNA.                                                                          |
| scl014773.13  | 0-S      | -25.5786 | -1.8  | Gprk5         | NM_018869.2 | Mus musculus G protein-coupled receptor kinase 5 (Gprk5), mRNA.                                                                         |
| scl0002729.1  | 104-S    | -25.5671 | -2.49 | Rgs3          | NM_134257.1 | Mus musculus regulator of G-protein signaling 3 (Rgs3), mRNA.                                                                           |
| scl42676.6    | 93-S     | -25.4971 | -1.41 | Rab10         | NM_016676.2 | Mus musculus RAB10, member RAS oncogene family (Rab10), mRNA.                                                                           |

|                      |          |       |               |             |                                                                                                                     |
|----------------------|----------|-------|---------------|-------------|---------------------------------------------------------------------------------------------------------------------|
| scl42274.8.1 35-S    | -25.4905 | -1.51 | Med6          | NM_027213.2 | Mus musculus mediator of RNA polymerase II transcription, subunit 6 homolog (yeast) (Med6), mRNA.                   |
| scl013831.1 46-S     | -25.4236 | -2.19 | Epc1          | NM_027497.1 | Mus musculus enhancer of polycomb homolog 1 (Drosophila) (Epc1), transcript variant 2, mRNA.                        |
| scl50105.6 4-S       | -25.4167 | -1.62 | Ppil1         | NM_026845.1 | Mus musculus peptidylprolyl isomerase (cyclophilin)-like 1 (Ppil1), mRNA.                                           |
| scl32052.6.1 83-S    | -25.3986 | -2.35 | Ypel3         | NM_025347.1 |                                                                                                                     |
| scl19472.10 43-S     | -25.3919 | -1.28 | Sh3glb2       | NM_139302.1 | Mus musculus SH3-domain GRB2-like endophilin B2 (Sh3glb2), mRNA.                                                    |
| scl22402.6.1 12-S    | -25.3298 | -1.26 | Mrps28        | NM_025434.2 | Mus musculus mitochondrial ribosomal protein S28 (Mrps28), mRNA.                                                    |
| scl0004044.1 9-S     | -25.3113 | -1.6  | Ppp1cb        | NM_172707.1 | Mus musculus protein phosphatase 1, catalytic subunit, beta isoform (Ppp1cb), mRNA.                                 |
| scl30562.12.1 13-S   | -25.2937 | -1.32 | Uros          | NM_009479.1 | Mus musculus uroporphyrinogen III synthase (Uros), mRNA.                                                            |
| scl00242291.2 165-S  | -25.2834 | -2.26 | 1110001C20Rik | NM_177730.2 | Mus musculus RIKEN cDNA 1110001C20 gene (1110001C20Rik), mRNA.                                                      |
| scl0097159.2 118-S   | -25.2594 | -1.45 | A430005L14Rik | NM_175287.2 | Mus musculus RIKEN cDNA A430005L14 gene (A430005L14Rik), mRNA.                                                      |
| scl45489.6.1 24-S    | -25.1733 | -1.75 | 2510005D08Rik | NM_026526.1 | Mus musculus RIKEN cDNA 2510005D08 gene (2510005D08Rik), mRNA.                                                      |
| scl40109.5.1 10-S    | -25.1699 | -1.56 | 2410012H22Rik | XM_126343.1 | Mus musculus RIKEN cDNA 2410012H22 gene (2410012H22Rik), mRNA.                                                      |
| scl35716.24.1 20-S   | -25.139  | -1.71 | Map2k5        | NM_011840.1 | Mus musculus mitogen activated protein kinase kinase 5 (Map2k5), mRNA.                                              |
| scl0403187.2 39-S    | -25.1217 | -1.3  | D630048P19Rik | NM_207525.1 | Mus musculus RIKEN cDNA D630048P19 gene (D630048P19Rik), mRNA.                                                      |
| scl00243382.2 254-S  | -25.1182 | -1.47 | A930026L03Rik | NM_175523.2 | Mus musculus RIKEN cDNA A930026L03 gene (A930026L03Rik), mRNA.                                                      |
| scl25783.3.1 76-S    | -25.0472 | -1.53 | Zfp99         | NM_023322.1 | Mus musculus zinc finger protein 99 (Zfp99), mRNA.                                                                  |
| scl0076373.1 321-S   | -25.0252 | -4.99 | 2810409K11Rik | XM_133164   | Mus musculus RIKEN cDNA 2810409K11 gene (2810409K11Rik), mRNA.                                                      |
| scl54833.10 21-S     | -24.9864 | -1.19 | Atp6ap1       | NM_018794.2 | Mus musculus ATPase, H <sup>+</sup> transporting, lysosomal accessory protein 1 (Atp6ap1), mRNA.                    |
| scl0381974.1 329-S   | -24.966  | -5.07 | Mrgprg        | NM_203492.1 | Mus musculus MAS-related GPR, member G (Mrgprg), mRNA.                                                              |
| scl000251.1 1-S      | -24.9576 | -1.46 | Mrpl48        | NM_026971.2 | Mus musculus mitochondrial ribosomal protein L48 (Mrpl48), transcript variant 2, mRNA.                              |
| scl068552.1 11-S     | -24.9285 | -1.2  | 1110003E01Rik | NM_133697.1 | Mus musculus RIKEN cDNA 1110003E01 gene (1110003E01Rik), mRNA.                                                      |
| scl016905.3 15-S     | -24.9253 | -1.26 | Lmna          | NM_019390.1 | Mus musculus lamin A (Lmna), mRNA.                                                                                  |
| scl0001498.1 3411-S  | -24.8972 | -1.61 | Ankyf1        | NM_009671   | Mus musculus ankyrin repeat and FYVE domain containing 1 (Ankyf1), mRNA.                                            |
| scl19139.14 223-S    | -24.8323 | -1.96 | Waspip        | NM_153138.2 | Mus musculus Wiskott-Aldrich syndrome protein interacting protein (Waspip), mRNA.                                   |
| scl022121.1 118-S    | -24.7791 | -1.33 | Rpl13a        | NM_009438   | Mus musculus ribosomal protein L13a (Rpl13a), mRNA.                                                                 |
| scl073737.1 220-S    | -24.7503 | -1.28 | 1110008P14Rik | NM_198001.1 | Mus musculus RIKEN cDNA 1110008P14 gene (1110008P14Rik), mRNA.                                                      |
| scl0003562.1 115-S   | -24.6859 | -1.37 | Mrpl3         | NM_053159.2 | Mus musculus mitochondrial ribosomal protein L3 (Mrpl3), mRNA.                                                      |
| scl30601.15 186-S    | -24.6753 | -1.26 | Ate1          | NM_013799.2 | Mus musculus arginine-tRNA-protein transferase 1 (Ate1), mRNA.                                                      |
| scl29767.12 42-S     | -24.6445 | -1.23 | Mgl1          | NM_011844.3 | Mus musculus monoglyceride lipase (Mgl1), mRNA.                                                                     |
| scl31481.11 594-S    | -24.6354 | -1.32 | 2700023B17Rik | NM_025948.1 | Mus musculus RIKEN cDNA 2700023B17 gene (2700023B17Rik), mRNA.                                                      |
| scl43949.6.1 8-S     | -24.5996 | -1.39 | Thoc3         | NM_028597.1 | Mus musculus THO complex 3 (Thoc3), mRNA.                                                                           |
| scl54811.82 56-S     | -24.5712 | -1.27 | Dmd           | NM_007868.1 | Mus musculus dystrophin, muscular dystrophy (Dmd), mRNA.                                                            |
| scl0018117.1 185-S   | -24.564  | -1.74 | Noc4          | NM_010926.1 | Mus musculus neighbor of Cox4 (Noc4), mRNA.                                                                         |
| scl00264064.2 74-S   | -24.5163 | -5.56 | Cdk8          | NM_181570.1 | Mus musculus cyclin-dependent kinase 8 (Cdk8), transcript variant 1, mRNA.                                          |
| scl066359.2 17-S     | -24.4785 | -1.21 | 2310005N03Rik | NM_025511.1 | Mus musculus RIKEN cDNA 2310005N03 gene (2310005N03Rik), mRNA.                                                      |
| scl0066190.1 159-S   | -24.4662 | -2.03 | Phca          | NM_025408.1 | Mus musculus phytoceramidase, alkaline (Phca), mRNA.                                                                |
| scl026429.1 36-S     | -24.4416 | -3.64 | Orc5l         | NM_011959.1 | Mus musculus origin recognition complex, subunit 5-like (S. cerevisiae) (Orc5l), mRNA.                              |
| scl0268490.8 24-S    | -24.404  | -1.64 | 2600001B17Rik | NM_172947.1 |                                                                                                                     |
| scl28384.6 282-S     | -24.3658 | -1.83 | Cnd2          | NM_009829.2 | Mus musculus cyclin D2 (Cnd2), mRNA.                                                                                |
| scl26325.14 6-S      | -24.3515 | -6    | A1461788      | NM_172714.1 | Mus musculus expressed sequence A1461788 (A1461788), mRNA.                                                          |
| scl011545.25 15-S    | -24.3408 | -1.46 | Adprt1        | NM_007415.2 | Mus musculus ADP-ribosyltransferase (NAD <sup>+</sup> ; poly (ADP-ribose) polymerase) 1 (Adprt1), mRNA.             |
| scl0108121.3 5-S     | -24.3394 | -1.54 | U2af1         | NM_024187   | Mus musculus U2 small nuclear ribonucleoprotein auxiliary factor (U2AF) 1 (U2af1), mRNA.                            |
| scl31901.9 22-S      | -24.3159 | -1.25 | Psm13         | NM_011875.2 | Mus musculus proteasome (prosome, macropain) 26S subunit, non-ATPase, 13 (Psm13), mRNA.                             |
| scl0003277.1 55-S    | -24.2798 | -2.22 | H13           | NM_010376.2 | Mus musculus histocompatibility 13 (H13), mRNA.                                                                     |
| scl0012050.1 82-S    | -24.2672 | -1.22 | Bcl2l2        | NM_007537.1 | Mus musculus Bcl2-like 2 (Bcl2l2), mRNA.                                                                            |
| scl45926.20.1 29-S   | -24.2088 | -1.37 | Pcca          | NM_144844.1 | Mus musculus propionyl-Coenzyme A carboxylase, alpha polypeptide (Pcca), mRNA.                                      |
| scl53699.1.245 256-S | -24.1738 | -4.3  | Kctd12b       | NM_175429.3 | Mus musculus potassium channel tetramerisation domain containing 12b (Kctd12b), mRNA.                               |
| scl0066377.1 24-S    | -24.1692 | -1.21 | Ndufc1        | NM_025523.1 | Mus musculus NADH dehydrogenase (ubiquinone) 1, subcomplex unknown, 1 (Ndufc1), mRNA.                               |
| scl056436.9 4-S      | -24.1685 | -1.33 | Adrm1         | NM_019822.2 | Mus musculus adhesion regulating molecule 1 (Adrm1), mRNA.                                                          |
| scl0067326.2 320-S   | -24.1634 | -1.51 | 1700037H04Rik | NM_026091.1 | Mus musculus RIKEN cDNA 1700037H04 gene (1700037H04Rik), mRNA.                                                      |
| scl18457.19.17 30-S  | -24.1495 | -1.7  | Trpc4ap       | NM_019828.1 | Mus musculus transient receptor potential cation channel, subfamily C, member 4 associated protein (Trpc4ap), mRNA. |
| scl0003913.1 65-S    | -24.0648 | -1.75 | Cdk4          | NM_009870.2 | Mus musculus cyclin-dependent kinase 4 (Cdk4), mRNA.                                                                |
| scl24262.3 152-S     | -24.0144 | -2.9  | Hdh3          | NM_024257.1 |                                                                                                                     |
| scl0019157.1 43-S    | -23.9856 | -1.48 | Pscd1         | NM_011180.2 | Mus musculus pleckstrin homology, Sec7 and coiled-coil domains 1 (Pscd1), mRNA.                                     |
| scl0003075.1 15-S    | -23.9723 | -2.33 | 2310042M24Rik | NM_025868.1 | Mus musculus RIKEN cDNA 2310042M24 gene (2310042M24Rik), mRNA.                                                      |
| scl25753.9 50-S      | -23.9577 | -1.19 | Ubl3          | NM_011908.1 | Mus musculus ubiquitin-like 3 (Ubl3), mRNA.                                                                         |

|               |       |          |       |               |             |                                                                                                                |
|---------------|-------|----------|-------|---------------|-------------|----------------------------------------------------------------------------------------------------------------|
| sc137899.10   | 160-S | -23.9569 | -1.24 | Vps26         | NM_133672   | Mus musculus vacuolar protein sorting 26 (yeast) (Vps26), mRNA.                                                |
| sc1066154.6   | 169-S | -23.9425 | -1.25 | Tmem14c       | NM_025387.1 |                                                                                                                |
| sc131799.8.1  | 22-S  | -23.9182 | -5.82 | Ube2s         | NM_133777.1 | Mus musculus ubiquitin-conjugating enzyme E2S (Ube2s), mRNA.                                                   |
| sc142728.4.1  | 1-S   | -23.9163 | -1.25 | Siva          | NM_013929   | Mus musculus Cd27 binding protein (Hindu God of destruction) (Siva), mRNA.                                     |
| sc1072330.2   | 29-S  | -23.9032 | -2.06 | Kbtbd5        | XM_147132.2 |                                                                                                                |
| sc132920.6.1  | 10-S  | -23.8823 | -6.65 | Tgfb1         | NM_011577.1 | Mus musculus transforming growth factor, beta 1 (Tgfb1), mRNA.                                                 |
| sc1098710.3   | 111-S | -23.8741 | -2.13 | Rabif         | NM_145510.1 |                                                                                                                |
| sc140402.14.1 | 6-S   | -23.8455 | -1.3  | 4933407N01Rik | NM_025745.2 | Mus musculus RIKEN cDNA 4933407N01 gene (4933407N01Rik), mRNA.                                                 |
| sc139222.8.1  | 55-S  | -23.8214 | -1.41 | Cbr2          | NM_007621.1 | Mus musculus carbonyl reductase 2 (Cbr2), mRNA.                                                                |
| sc1069029.1   | 30-S  | -23.8163 | -1.18 | 1500032L24Rik | XM_193800.2 | Mus musculus RIKEN cDNA 1500032L24 gene (1500032L24Rik), mRNA.                                                 |
| sc119835.1    | 73-S  | -23.7634 | -4.39 | Rnpc1         | NM_019547.1 | Mus musculus RNA-binding region (RNP1, RRM) containing 1 (Rnpc1), mRNA.                                        |
| sc10004155.1  | 21-S  | -23.731  | -1.75 | Hip2          | NM_016786.2 | Mus musculus huntingtin interacting protein 2 (Hip2), mRNA.                                                    |
| sc1019989.6   | 6-S   | -23.7178 | -1.19 | Rpl7          | NM_011291   | Mus musculus ribosomal protein L7 (Rpl7), mRNA.                                                                |
| sc10066801.1  | 114-S | -23.7175 | -2.91 | Prkrip1       | NM_025774.1 | Mus musculus Prkr interacting protein 1 (IL11 inducible) (Prkrip1), mRNA.                                      |
| sc133204.17   | 108-S | -23.6845 | -1.23 | D8Erttd325e   | NM_025804   | Mus musculus DNA segment, Chr 8, ERATO Doi 325, expressed (D8Erttd325e), mRNA.                                 |
| sc129544.11   | 278-S | -23.6703 | -1.89 | Mfap5         | NM_015776   | Mus musculus microfibrillar associated protein 5 (Mfap5), mRNA.                                                |
| sc121737.4    | 335-S | -23.662  | -1.37 | Olflm3        | NM_133859.1 |                                                                                                                |
| sc10056376.2  | 179-S | -23.656  | -2.8  | 1110001A05Rik | NM_019808.1 | Mus musculus RIKEN cDNA 1110001A05 gene (1110001A05Rik), mRNA.                                                 |
| sc10067236.2  | 173-S | -23.6461 | -1.34 | 2810452K22Rik | NM_026048.1 | Mus musculus RIKEN cDNA 2810452K22 gene (2810452K22Rik), mRNA.                                                 |
| sc10114863.5  | 23-S  | -23.5978 | -1.95 | Prosc         | NM_054057.1 | Mus musculus proline synthetase co-transcribed (Prosc), mRNA.                                                  |
| sc10001492.1  | 86-S  | -23.5567 | -5.46 | Myocd         | NM_146386.1 | Mus musculus myocardin (Myocd), mRNA.                                                                          |
| sc10018008.1  | 3-S   | -23.5468 | -4.8  | Nes           | NM_016701.2 | Mus musculus nestin (Nes), mRNA.                                                                               |
| sc139475.6    | 48-S  | -23.5224 | -1.84 | Gosr2         | NM_019650.2 | Mus musculus golgi SNAP receptor complex member 2 (Gosr2), mRNA.                                               |
| sc136834.4.1  | 4-S   | -23.514  | -3.16 | Snpc5         | NM_183316.1 | Mus musculus small nuclear RNA activating complex, polypeptide 5 (Snpc5), mRNA.                                |
| sc116965.6    | 134-S | -23.4874 | -1.39 | Tceb1         | NM_026456.2 | Mus musculus transcription elongation factor B (SIII), polypeptide 1 (Tceb1), mRNA.                            |
| sc148855.3.1  | 17-S  | -23.4735 | -1.33 | Cbr1          | NM_007620.1 | Mus musculus carbonyl reductase 1 (Cbr1), mRNA.                                                                |
| sc127602.3.1  | 69-S  | -23.4581 | -1.42 | Cxcl4         | NM_019932.1 | Mus musculus chemokine (C-X-C motif) ligand 4 (Cxcl4), mRNA.                                                   |
| sc125380.5    | 310-S | -23.4527 | -1.51 | Slc31a1       | NM_175090.2 | Mus musculus solute carrier family 31, member 1 (Slc31a1), mRNA.                                               |
| sc137876.12   | 7-S   | -23.4017 | -2.03 | Sirt1         | NM_019812.1 | Mus musculus sirtuin 1 (silent mating type information regulation 2, homolog) 1 (S. cerevisiae) (Sirt1), mRNA. |
| sc1000669.1   | 31-S  | -23.2945 | -1.3  | Gpsn2         | NM_134118.1 | Mus musculus glycoprotein, synaptic 2 (Gpsn2), mRNA.                                                           |
| sc10001548.1  | 1-S   | -23.2756 | -4.48 | Abca9         | NM_147220.1 | Mus musculus ATP-binding cassette transporter sub-family A member 9 (Abca9), mRNA.                             |
| sc1013808.8   | 24-S  | -23.2426 | -1.24 | Eno3          | NM_007933.2 | Mus musculus enolase 3, beta muscle (Eno3), mRNA.                                                              |
| sc121370.9    | 11-S  | -23.1916 | -1.19 | Acadm         | NM_007382   | Mus musculus acetyl-Coenzyme A dehydrogenase, medium chain (Acadm), mRNA.                                      |
| sc118631.16   | 116-S | -23.1717 | -1.62 | Slc23a2       | NM_018824.2 | Mus musculus solute carrier family 23 (nucleobase transporters), member 2 (Slc23a2), mRNA.                     |
| sc10002598.1  | 1-S   | -23.1148 | -4.77 | Prnpip1       | NM_080469.2 | Mus musculus prion protein interacting protein 1 (Prnpip1), mRNA.                                              |
| sc10002929.1  | 32-S  | -23.104  | -1.71 | 2610029G23Rik | NM_026312.2 | Mus musculus RIKEN cDNA 2610029G23 gene (2610029G23Rik), mRNA.                                                 |
| sc1068955.1   | 4-S   | -23.0997 | -3.1  | 1500001A10Rik | NM_026886   | Mus musculus RIKEN cDNA 1500001A10 gene (1500001A10Rik), mRNA.                                                 |
| sc121068.9    | 287-S | -23.0867 | -2.27 | 2810003C17Rik | NM_145144.1 | Mus musculus RIKEN cDNA 2810003C17 gene (2810003C17Rik), mRNA.                                                 |
| sc10076846.1  | 142-S | -23.0804 | -1.21 | 3010033P07Rik | NM_029767.1 |                                                                                                                |
| sc10020638.1  | 79-S  | -23.0711 | -1.88 | Snrbp         | NM_009225.1 | Mus musculus small nuclear ribonucleoprotein B (Snrbp), mRNA.                                                  |
| sc140464.11   | 0-S   | -23.0534 | -1.21 | Ugp2          | NM_139297.2 | Mus musculus UDP-glucose pyrophosphorylase 2 (Ugp2), mRNA.                                                     |
| sc10001990.1  | 3-S   | -23.0459 | -1.92 | 4933434E20Rik | NM_025762   | Mus musculus RIKEN cDNA 4933434E20 gene (4933434E20Rik), mRNA.                                                 |
| sc1020541.2   | 143-S | -23.0298 | -1.33 | Slc8a1        | NM_011406.1 | Mus musculus solute carrier family 8 (sodium/calcium exchanger), member 1 (Slc8a1), mRNA.                      |
| sc1068089.7   | 12-S  | -23.0276 | -1.43 | Arpc4         | NM_026552   | Mus musculus actin related protein 2/3 complex, subunit 4 (Arpc4), mRNA.                                       |
| sc13515.3     | 6-S   | -22.9388 | -1.95 | 1200002G13Rik | NM_025360.1 | Mus musculus RIKEN cDNA 1200002G13 gene (1200002G13Rik), mRNA.                                                 |
| sc1000968.1   | 12-S  | -22.9228 | -1.75 | Uchl5         | NM_019562.1 | Mus musculus ubiquitin carboxyl-terminal esterase L5 (Uchl5), mRNA.                                            |
| sc10001010.1  | 64-S  | -22.8802 | -3.53 | Ppil3         | NM_027351   | Mus musculus peptidylprolyl isomerase (cyclophilin)-like 3 (Ppil3), mRNA.                                      |
| sc141505.7.1  | 14-S  | -22.865  | -5.42 | 2310033P09Rik | NM_024210.1 | Mus musculus RIKEN cDNA 2310033P09 gene (2310033P09Rik), mRNA.                                                 |
| sc1066522.1   | 109-S | -22.8442 | -1.6  | Pgpep1        | NM_023217.2 |                                                                                                                |
| sc121820.14.1 | 60-S  | -22.7694 | -5.19 | Vps45         | NM_013841.1 | Mus musculus vacuolar protein sorting 45 (yeast) (Vps45), mRNA.                                                |
| sc144251.7.1  | 3-S   | -22.766  | -2.06 | Stard3nl      | NM_024270.1 | Mus musculus STARD3 N-terminal like (Stard3nl), mRNA.                                                          |
| sc1023825.3   | 146-S | -22.7348 | -1.22 | Banf1         | NM_011793.2 | Mus musculus barrier to autointegration factor 1 (Banf1), mRNA.                                                |
| sc121665.7.1  | 0-S   | -22.729  | -1.52 | 0610005A07Rik | XM_359308.1 | Mus musculus RIKEN cDNA 0610005A07 gene (0610005A07Rik), mRNA.                                                 |
| sc1019684.7   | 10-S  | -22.7245 | -2.31 | Rdx           | NM_009041   | Mus musculus radixin (Rdx), mRNA.                                                                              |
| sc139660.7    | 333-S | -22.7186 | -1.6  | Ai415282      | NM_134021.1 | Mus musculus expressed sequence AI415282 (AI415282), mRNA.                                                     |
| sc100109019.2 | 207-S | -22.7143 | -3.26 | 5830411E10Rik | NM_028696.1 | Mus musculus RIKEN cDNA 5830411E10 gene (5830411E10Rik), mRNA.                                                 |

|                         |          |       |               |             |                                                                                                                                   |
|-------------------------|----------|-------|---------------|-------------|-----------------------------------------------------------------------------------------------------------------------------------|
| scl48137.14.1 1-S       | -22.6957 | -1.24 | Oxct1         | NM 024188.3 |                                                                                                                                   |
| scl056043.1 7-S         | -22.6802 | -1.37 | Akr1e1        | NM 018859.1 | Mus musculus aldo-keto reductase family 1, member E1 (Akr1e1), mRNA.                                                              |
| scl52793.9.1 8-S        | -22.6702 | -4.03 | Unc93b        | NM 019449.1 | Mus musculus unc-93 homolog B (C. elegans) (Unc93b), mRNA.                                                                        |
| scl068713.2 9-S         | -22.6672 | -1.42 | Ifitm1        | NM 026820   | Mus musculus interferon induced transmembrane protein 1 (Ifitm1), mRNA.                                                           |
| scl00226251.1 194-S     | -22.6635 | -6.4  | Ablm1         | NM 178688.2 | Mus musculus actin-binding LIM protein 1 (Ablm1), mRNA.                                                                           |
| scl54681.4 59-S         | -22.6071 | -1.31 | Sh3bgrl       | NM 019989.2 | Mus musculus SH3-binding domain glutamic acid-rich protein like (Sh3bgrl), mRNA.                                                  |
| scl0070316.1 255-S      | -22.5864 | -3.18 | Ndufab1       | NM 028177.2 | Mus musculus NADH dehydrogenase (ubiquinone) 1, alpha/beta subcomplex, 1 (Ndufab1), mRNA.                                         |
| scl42524.16 317-S       | -22.5573 | -2.33 | Scin          | NM 009132.1 | Mus musculus scinderin (Scin), mRNA.                                                                                              |
| scl0001436.1 98-S       | -22.5072 | -1.2  | Commd1        | NM 144514.1 | Mus musculus COMM domain containing 1 (Commd1), mRNA.                                                                             |
| scl071780.11 24-S       | -22.4805 | -2.74 | Isyna1        | NM 023627.1 | Mus musculus myo-inositol 1-phosphate synthase A1 (Isyna1), mRNA.                                                                 |
| scl32044.6 195-S        | -22.4218 | -1.32 | Cdipt         | NM 138754.1 | Mus musculus CDP-diacylglycerol-inositol 3-phosphatidyltransferase (phosphatidylinositol synthase) (Cdipt), mRNA.                 |
| scl069890.1 204-S       | -22.4171 | -1.58 | Zfp219        | NM 027248   | Mus musculus zinc finger protein 219 (Zfp219), mRNA.                                                                              |
| scl47406.11 619-S       | -22.4022 | -3.28 | Slc1a3        | NM 148938.2 | Mus musculus solute carrier family 1 (glial high affinity glutamate transporter), member 3 (Slc1a3), mRNA.                        |
| scl0003429.1 37-S       | -22.3979 | -1.33 | Hmbs          | NM 013551   | Mus musculus hydroxymethylbilane synthase (Hmbs), mRNA.                                                                           |
| scl000935.1 50-S        | -22.3943 | -1.8  | Tfb2m         | XM 122407.1 | Mus musculus transcription factor B2, mitochondrial (Tfb2m), mRNA.                                                                |
| scl17197.4 15-S         | -22.3887 | -1.65 | Tagln2        | NM 178598.1 | Mus musculus transgelin 2 (Tagln2), mRNA.                                                                                         |
| scl074194.1 11-S        | -22.3689 | -3.76 | Rhoe          | NM 028810.1 | Mus musculus ras homolog gene family, member E (Rhoe), mRNA.                                                                      |
| scl00101206.2 281-S     | -22.3673 | -1.37 | Tada3l        | NM 133932.1 | Mus musculus transcriptional adaptor 3 (NGG1 homolog, yeast)-like (Tada3l), mRNA.                                                 |
| scl018247.9 19-S        | -22.3509 | -1.27 | Oaz2          | NM 010952.2 | Mus musculus ornithine decarboxylase antizyme 2 (Oaz2), mRNA.                                                                     |
| scl053606.2 17-S        | -22.3284 | -2.26 | G1p2          | NM 015783.1 | Mus musculus interferon, alpha-inducible protein (G1p2), mRNA.                                                                    |
| scl098496.1 28-S        | -22.2809 | -1.65 | AL024069      | XM 129912.3 | Mus musculus expressed sequence AL024069 (AL024069), mRNA.                                                                        |
| scl54611.2 16-S         | -22.2519 | -1.9  | Tceal1        | NM 146236.1 | Mus musculus transcription elongation factor A (SII)-like 1 (Tceal1), mRNA.                                                       |
| scl30749.5 442-S        | -22.2168 | -1.51 | Gprc5b        | NM 022420.1 | Mus musculus G protein-coupled receptor, family C, group 5, member B (Gprc5b), mRNA.                                              |
| scl000472.1 13-S        | -22.2086 | -1.62 | 1110011F09Rik | NM 029576.1 | Mus musculus RIKEN cDNA 1110011F09 gene (1110011F09Rik), mRNA.                                                                    |
| scl0003116.1 14-S       | -22.1744 | -1.64 | Gnas          | NM 010309.1 | Mus musculus GNAS (guanine nucleotide binding protein, alpha stimulating) complex locus (Gnas), mRNA.                             |
| scl30960.6.1 9-S        | -22.1586 | -2.12 | Folr2         | NM 008035   | Mus musculus folate receptor 2 (fetal) (Folr2), mRNA.                                                                             |
| scl0001167.1 16-S       | -22.1534 | -3.35 | Lmcd1         | NM 144799.1 | Mus musculus LIM and cysteine-rich domains 1 (Lmcd1), mRNA.                                                                       |
| scl41340.2.1 55-S       | -22.1422 | -3.65 | 1110030J09Rik | NM 025397.2 | Mus musculus RIKEN cDNA 1110030J09 gene (1110030J09Rik), mRNA.                                                                    |
| scl34186.14 327-S       | -22.1379 | -1.37 | Abcb10        | NM 019552.1 | Mus musculus ATP-binding cassette, sub-family B (MDR/TAP), member 10 (Abcb10), nuclear gene encoding mitochondrial protein, mRNA. |
| scl012988.1 164-S       | -22.1295 | -1.76 | Csk           | NM 007783.2 | Mus musculus c-src tyrosine kinase (Csk), mRNA.                                                                                   |
| scl23400.7 310-S        | -22.0975 | -3.53 | Stmn2         | NM 025285.1 | Mus musculus stathmin-like 2 (Stmn2), mRNA.                                                                                       |
| scl0001675.1 34-S       | -22.0584 | -5.13 | Tbp           | NM 013684.1 | Mus musculus TATA box binding protein (Tbp), mRNA.                                                                                |
| scl32923.6.1 33-S       | -22.0452 | -2.26 | Exosc5        | NM 138586.1 | Mus musculus exosome component 5 (Exosc5), mRNA.                                                                                  |
| scl54629.5 192-S        | -21.9922 | -1.68 | Armcx1        | NM 030066.2 |                                                                                                                                   |
| scl38265.24.1 4-S       | -21.975  | -1.64 | Itga7         | NM 008398.1 | Mus musculus integrin alpha 7 (Itga7), mRNA.                                                                                      |
| scl0210106.1 119-S      | -21.9653 | -1.54 | Polr          | NM 198600.1 | Mus musculus polymerase (DNA directed) sigma (Polr), mRNA.                                                                        |
| scl0002324.1 12-S       | -21.9604 | -1.73 | Synj2bp       | NM 025292.2 | Mus musculus synaptojanin 2 binding protein (Synj2bp), mRNA.                                                                      |
| scl067956.13 1-S        | -21.9537 | -1.32 | 2410195B05Rik | NM 030241.2 | Mus musculus RIKEN cDNA 2410195B05 gene (2410195B05Rik), mRNA.                                                                    |
| scl30477.6 12-S         | -21.9445 | -1.78 | 2700078K21Rik | NM 028308.1 |                                                                                                                                   |
| scl071966.3 0-S         | -21.88   | -1.28 | Nkiras2       | NM 028024.1 | Mus musculus NFkB inhibitor interacting Ras-like protein 2 (Nkiras2), mRNA.                                                       |
| scl067678.4 130-S       | -21.8752 | -1.31 | Lsm3          | NM 026309.1 | Mus musculus LSM3 homolog, U6 small nuclear RNA associated (S. cerevisiae) (Lsm3), mRNA.                                          |
| scl0004066.1 8-S        | -21.8581 | -2.93 | Asl           | NM 133768.1 | Mus musculus argininosuccinate lyase (Asl), mRNA.                                                                                 |
| scl0016998.2 125-S      | -21.8349 | -1.38 | Ltbp3         | NM 008520.1 | Mus musculus latent transforming growth factor beta binding protein 3 (Ltbp3), mRNA.                                              |
| scl022381.3 136-S       | -21.809  | -1.3  | Wbp5          | NM 011712.1 | Mus musculus WW domain binding protein 5 (Wbp5), mRNA.                                                                            |
| scl37205.3.1 21-S       | -21.7647 | -1.37 | 1810008A14Rik | NM 025457.1 | Mus musculus RIKEN cDNA 1810008A14 gene (1810008A14Rik), mRNA.                                                                    |
| scl53527.2.1 48-S       | -21.7573 | -2.94 | 2410004C24Rik | NM 133678.2 | Mus musculus RIKEN cDNA 2410004C24 gene (2410004C24Rik), mRNA.                                                                    |
| scl29898.5 140-S        | -21.7184 | -1.31 | Vps24         | NM 025783.2 | Mus musculus vacuolar protein sorting 24 (yeast) (Vps24), mRNA.                                                                   |
| scl067163.2 42-S        | -21.7    | -2.62 | 2610204L23Rik | NM 026009.1 | Mus musculus RIKEN cDNA 2610204L23 gene (2610204L23Rik), mRNA.                                                                    |
| scl33370.7 212-S        | -21.6862 | -1.31 | 1810044O22Rik | NM 025558.2 | Mus musculus RIKEN cDNA 1810044O22 gene (1810044O22Rik), mRNA.                                                                    |
| gi_7305154 ref. NM_0133 | -21.6612 | -1.25 | Hprt          | NM 013556.1 | Mus musculus hypoxanthine guanine phosphoribosyl transferase (Hprt), mRNA.                                                        |
| scl014745.1 6-S         | -21.6555 | -1.45 | Edg2          | NM 010336   | Mus musculus endothelial differentiation, lysophosphatidic acid G-protein-coupled receptor, 2 (Edg2), mRNA.                       |
| scl0105239.1 62-S       | -21.6218 | -1.2  | Rnf44         | NM 134064.1 | Mus musculus ring finger protein 44 (Rnf44), mRNA.                                                                                |
| scl0072133.2 35-S       | -21.608  | -5.02 | 2610009I02Rik | NM 028115.2 | Mus musculus RIKEN cDNA 2610009I02 gene (2610009I02Rik), mRNA.                                                                    |
| scl0059069.1 170-S      | -21.6062 | -1.24 | Tpm3          | NM 022314.2 | Mus musculus tropomyosin 3, gamma (Tpm3), mRNA.                                                                                   |
| scl017256.3 8-S         | -21.5952 | -2.08 | Mea1          | NM 010787.1 | Mus musculus male enhanced antigen 1 (Mea1), mRNA.                                                                                |
| scl0112405.12 70-S      | -21.5809 | -1.37 | Egln1         | NM 053207.1 | Mus musculus EGL nine homolog 1 (C. elegans) (Egln1), mRNA.                                                                       |

|                 |        |          |       |               |             |                                                                                        |
|-----------------|--------|----------|-------|---------------|-------------|----------------------------------------------------------------------------------------|
| scl15925.5      | 61-S   | -21.5648 | -1.37 | Pea15         | NM_008556.1 | Mus musculus phosphoprotein enriched in astrocytes 15 (Pea15), mRNA.                   |
| scl0059091.1    | 151-S  | -21.5553 | -2.44 | Jph2          | NM_021566.1 | Mus musculus junctophilin 2 (Jph2), mRNA.                                              |
| scl0001589.1    | 43-S   | -21.5324 | -4.49 | Al415282      | NM_134021.1 | Mus musculus expressed sequence Al415282 (Al415282), mRNA.                             |
| scl0001950.1    | 6-S    | -21.5286 | -1.65 | Tpm3          | NM_022314   | Mus musculus tropomyosin 3, gamma (Tpm3), mRNA.                                        |
| scl00244416.2   | 151-S  | -21.4923 | -2.94 | Ppp1r3b       | NM_177741.2 | Mus musculus protein phosphatase 1, regulatory (inhibitor) subunit 3B (Ppp1r3b), mRNA. |
| scl0026992.2    | 59-S   | -21.4771 | -1.33 | Brd7          | NM_012047.1 | Mus musculus bromodomain containing 7 (Brd7), mRNA.                                    |
| scl45163.12.1   | 28-S   | -21.4032 | -1.87 | 2610025M23Rik | NM_029578   | Mus musculus RIKEN cDNA 2610025M23 gene (2610025M23Rik), mRNA.                         |
| scl071810.6     | 21-S   | -21.395  | -4.74 | 2610024N24Rik | NM_128698.5 | Mus musculus RIKEN cDNA 2610024N24 gene (2610024N24Rik), mRNA.                         |
| scl0059043.2    | 22-S   | -21.39   | -1.19 | Wsb2          | NM_021539.3 | Mus musculus WD repeat and SOCS box-containing 2 (Wsb2), mRNA.                         |
| scl19453.6.2634 | 3-S    | -21.3497 | -1.79 | A130092J06Rik | NM_175511.2 | Mus musculus RIKEN cDNA A130092J06 gene (A130092J06Rik), mRNA.                         |
| scl000524.1     | 1771-S | -21.3419 | -2.22 | Gcnt1         | NM_173442.1 | Mus musculus glucosaminyl (N-acetyl) transferase 1, core 2 (Gcnt1), mRNA.              |
| scl000275.1     | 39-S   | -21.2939 | -1.24 | 3010033P07Rik | NM_029767.1 | Mus musculus RIKEN cDNA 3010033P07 gene (3010033P07Rik), mRNA.                         |
| scl022041.3     | 13-S   | -21.2018 | -1.51 | Trf           | NM_133977.1 | Mus musculus transferrin (Trf), mRNA.                                                  |
| scl40969.4.1    | 13-S   | -21.1637 | -1.98 | Mrpl10        | NM_026154.1 | Mus musculus mitochondrial ribosomal protein L10 (Mrpl10), mRNA.                       |
| scl0001081.1    | 37-S   | -21.1491 | -1.76 | Camk1         | NM_133926.1 | Mus musculus calcium/calmodulin-dependent protein kinase 1 (Camk1), mRNA.              |
| scl47631.9.1    | 4-S    | -21.0988 | -1.48 | 5730592L21Rik | NM_029720.1 | Mus musculus RIKEN cDNA 5730592L21 gene (5730592L21Rik), mRNA.                         |
| scl017470.1     | 35-S   | -21.0961 | -1.38 | Cd200         | NM_010818   |                                                                                        |
| scl0001816.1    | 0-S    | -21.0959 | -1.63 | Eif4a2        | XM_147230.1 | Mus musculus eukaryotic translation initiation factor 4A2 (Eif4a2), mRNA.              |
| scl31415.7      | 3-S    | -21.047  | -1.19 | 2310044H10Rik | NM_197991   | Mus musculus RIKEN cDNA 2310044H10 gene (2310044H10Rik), mRNA.                         |
| scl0055989.2    | 71-S   | -21.0296 | -1.58 | Nol5          | NM_018868.1 | Mus musculus nucleolar protein 5 (Nol5), mRNA.                                         |
| scl0003640.1    | 4-S    | -20.9941 | -1.38 | Ptcd2         | XM_127497.2 |                                                                                        |
| scl21140.12.1   | 50-S   | -20.9808 | -3.31 | Dbh           | NM_138942.2 | Mus musculus dopamine beta hydroxylase (Dbh), mRNA.                                    |
| scl0023950.1    | 557-S  | -20.9769 | -1.75 | Dnajb6        | NM_011847.1 | Mus musculus DnaJ (Hsp40) homolog, subfamily B, member 6 (Dnajb6), mRNA.               |
| scl38324.4.1    | 0-S    | -20.9673 | -1.56 | Ddit3         | NM_007837.2 | Mus musculus DNA-damage inducible transcript 3 (Ddit3), mRNA.                          |
| scl0003223.1    | 29-S   | -20.9646 | -1.45 | Mrrf          | NM_026422.1 | Mus musculus mitochondrial ribosome recycling factor (Mrrf), mRNA.                     |
| scl057265.1     | 17-S   | -20.9627 | -4.53 | Fzd2          | NM_020510.1 | Mus musculus frizzled homolog 2 (Drosophila) (Fzd2), mRNA.                             |
| scl000082.1     | 54-S   | -20.9327 | -3.14 | Nr1d1         | NM_145434.1 | Mus musculus nuclear receptor subfamily 1, group D, member 1 (Nr1d1), mRNA.            |
| scl49266.7.1    | 79-S   | -20.9174 | -1.37 | Hes1          | NM_008235.2 | Mus musculus hairy and enhancer of split 1 (Drosophila) (Hes1), mRNA.                  |
| scl0320067.2    | 10-S   | -20.9051 | -3.32 | Tnni3k        | NM_177066.2 |                                                                                        |
| scl00242297.2   | 152-S  | -20.9038 | -1.6  | 1700012H17Rik | NM_173426.1 | Mus musculus RIKEN cDNA 1700012H17 gene (1700012H17Rik), mRNA.                         |
| scl020055.2     | 9-S    | -20.8921 | -1.22 | Rps16         | NM_013647.1 | Mus musculus ribosomal protein S16 (Rps16), mRNA.                                      |
| scl0067495.2    | 241-S  | -20.8633 | -1.41 | 2010200O16Rik | NM_026198.1 | Mus musculus RIKEN cDNA 2010200O16 gene (2010200O16Rik), mRNA.                         |
| scl53053.7.1    | 7-S    | -20.8481 | -1.75 | As3mt         | NM_020577.1 |                                                                                        |
| scl026557.1     | 7-S    | -20.8187 | -1.28 | Homer2        | XM_133550.4 | Mus musculus homer homolog 2 (Drosophila) (Homer2), mRNA.                              |
| scl37690.5.564  | 26-S   | -20.8169 | -1.27 | Gna11         | NM_010301.1 | Mus musculus guanine nucleotide binding protein, alpha 11 (Gna11), mRNA.               |
| scl0015531.1    | 129-S  | -20.779  | -1.62 | Ndst1         | NM_008306.2 | Mus musculus N-deacetylase/N-sulfotransferase (heparan glucosaminyl) 1 (Ndst1), mRNA.  |
| scl017283.2     | 24-S   | -20.7643 | -2.45 | Men1          | NM_008583.1 | Mus musculus multiple endocrine neoplasia 1 (Men1), mRNA.                              |
| scl0066421.2    | 54-S   | -20.7517 | -1.36 | 2410004B18Rik | NM_025555.1 | Mus musculus RIKEN cDNA 2410004B18 gene (2410004B18Rik), mRNA.                         |
| scl23476.5      | 13-S   | -20.7299 | -1.25 | Vamp3         | NM_009498.3 | Mus musculus vesicle-associated membrane protein 3 (Vamp3), mRNA.                      |
| scl40865.6.1    | 13-S   | -20.71   | -1.55 | G6pc3         | NM_175935.2 | Mus musculus glucose 6 phosphatase, catalytic, 3 (G6pc3), mRNA.                        |
| scl066163.7     | 0-S    | -20.7027 | -1.3  | Mrpl4         | NM_023167.1 | Mus musculus mitochondrial ribosomal protein L4 (Mrpl4), mRNA.                         |
| scl0058194.2    | 124-S  | -20.652  | -1.23 | Sh3kbp1       | NM_021389.3 | Mus musculus SH3-domain kinase binding protein 1 (Sh3kbp1), mRNA.                      |
| scl0228608.7    | 126-S  | -20.6338 | -2.06 | Smox          | NM_145533.1 | Mus musculus spermine oxidase (Smox), mRNA.                                            |
| scl099003.2     | 10-S   | -20.6041 | -1.76 | 4732486I23Rik | XM_130565.3 | Mus musculus RIKEN cDNA 4732486I23 gene (4732486I23Rik), mRNA.                         |
| scl24746.3      | 22-S   | -20.5995 | -1.21 | Hspb7         | NM_013868.2 | Mus musculus heat shock protein family, member 7 (cardiovascular) (Hspb7), mRNA.       |
| scl41542.4      | 321-S  | -20.5942 | -1.3  | Gm2a          | NM_010299.2 | Mus musculus GM2 ganglioside activator protein (Gm2a), mRNA.                           |
| scl25892.5.96   | 2-S    | -20.5877 | -1.5  | Ap1s1         | NM_007457.1 | Mus musculus adaptor protein complex AP-1, sigma 1 (Ap1s1), mRNA.                      |
| scl066496.2     | 57-S   | -20.5863 | -3.12 | 2700038C09Rik | NM_025598.1 | Mus musculus RIKEN cDNA 2700038C09 gene (2700038C09Rik), mRNA.                         |
| scl40146.10.1   | 50-S   | -20.5637 | -1.4  | Atfaf2        | NM_145427.1 | Mus musculus ATP synthase mitochondrial F1 complex assembly factor 2 (Atfaf2), mRNA.   |
| scl0002139.1    | 4-S    | -20.5581 | -5.14 | 5730537D05Rik | NM_027495.2 | Mus musculus RIKEN cDNA 5730537D05 gene (5730537D05Rik), mRNA.                         |
| scl0003295.1    | 37-S   | -20.5493 | -4.73 | Crat          | NM_007760.1 | Mus musculus camitine acetyltransferase (Crat), mRNA.                                  |
| scl00208922.2   | 306-S  | -20.5355 | -4.33 | Cpeb3         | NM_198300.1 | Mus musculus cytoplasmic polyadenylation element binding protein 3 (Cpeb3), mRNA.      |
| scl0018829.1    | 65-S   | -20.5097 | -1.71 | Ccl21b        | NM_011124.3 | Mus musculus chemokine (C-C motif) ligand 21b (serine) (Ccl21b), mRNA.                 |
| scl0217779.3    | 307-S  | -20.4931 | -1.66 | 2610022K04Rik | NM_153121.1 | Mus musculus RIKEN cDNA 2610022K04 gene (2610022K04Rik), mRNA.                         |
| scl0071078.2    | 199-S  | -20.4669 | -2.71 | Adam30        | NM_027665.1 | Mus musculus a disintegrin and metalloproteinase domain 30 (Adam30), mRNA.             |
| scl39937.19     | 289-S  | -20.4662 | -1.18 | Rpa1          | NM_026653.1 | Mus musculus replication protein A1 (Rpa1), mRNA.                                      |

|                     |          |       |               |             |                                                                                            |
|---------------------|----------|-------|---------------|-------------|--------------------------------------------------------------------------------------------|
| sci0014312.2_62-S   | -20.4626 | -1.38 | Brd2          | NM_010238.1 | Mus musculus bromodomain containing 2 (Brd2), mRNA.                                        |
| sci42309.7.1_14-S   | -20.4562 | -1.17 | Vti1b         | NM_016800.2 | Mus musculus vesicle transport through interaction with t-SNAREs 1B homolog (Vti1b), mRNA. |
| sci0075423.2_59-S   | -20.4534 | -2.59 | 2810410P22Rik | NM_182994.1 |                                                                                            |
| sci00101739.1_35-S  | -20.4466 | -1.5  | Psip1         | NM_133948.2 | Mus musculus PC4 and SFRS1 interacting protein 1 (Psip1), mRNA.                            |
| sci020116.3_11-S    | -20.4459 | -1.26 | Rps8          | NM_009098.2 | Mus musculus ribosomal protein S8 (Rps8), mRNA.                                            |
| sci072265.1_70-S    | -20.422  | -1.27 | Tram1         | NM_028173.1 | Mus musculus translocating chain-associating membrane protein 1 (Tram1), mRNA.             |
| sci46998.15.1_4-S   | -20.3832 | -1.41 | Eif3s7        | NM_018749   | Mus musculus eukaryotic translation initiation factor 3, subunit 7 (zeta) (Eif3s7), mRNA.  |
| sci000941.1_0-S     | -20.3706 | -1.2  | Ndufs2        | NM_153064.3 | Mus musculus NADH dehydrogenase (ubiquinone) Fe-S protein 2 (Ndufs2), mRNA.                |
| sci0051812.2_78-S   | -20.3424 | -1.41 | Mcrs1         | NM_016766.2 | Mus musculus microspherule protein 1 (Mcrs1), mRNA.                                        |
| sci39384.39.1_1-S   | -20.3123 | -1.46 | Abca8a        | NM_153145.1 | Mus musculus ATP-binding cassette, sub-family A (ABC1), member 8a (Abca8a), mRNA.          |
| sci0064138.2_328-S  | -20.3026 | -1.33 | Ctsz          | NM_022325.3 | Mus musculus cathepsin Z (Ctsz), mRNA.                                                     |
| sci55019.13_214-S   | -20.2434 | -1.48 | Pctk1         | NM_011049.2 | Mus musculus PCTAIRE-motif protein kinase 1 (Pctk1), mRNA.                                 |
| sci00072.1_32-S     | -20.2209 | -2.1  | Rab6          | NM_024287.2 | Mus musculus RAB6, member RAS oncogene family (Rab6), mRNA.                                |
| sci24711.3.1_0-S    | -20.2068 | -1.74 | Nppb          | NM_008726.2 | Mus musculus natriuretic peptide precursor type B (Nppb), mRNA.                            |
| sci0003006.1_310-S  | -20.1897 | -1.36 | Fbxo3         | NM_212433.1 | Mus musculus F-box only protein 3 (Fbxo3), transcript variant 2, mRNA.                     |
| sci21150.5.1_23-S   | -20.1848 | -1.7  | B230317C12Rik | NM_019833.1 | Mus musculus RIKEN cDNA B230317C12 gene (B230317C12Rik), mRNA.                             |
| sci33662.13_427-S   | -20.1526 | -1.61 | Hmgb2l1       | NM_178017.1 | Mus musculus high mobility group box 2-like 1 (Hmgb2l1), mRNA.                             |
| sci0001977.1_31-S   | -20.124  | -1.53 | Dap3          | NM_022994.2 | Mus musculus death associated protein 3 (Dap3), mRNA.                                      |
| sci50952.14_117-S   | -20.1069 | -1.31 | 1200007D18Rik | NM_026170.2 | Mus musculus RIKEN cDNA 1200007D18 gene (1200007D18Rik), mRNA.                             |
| sci49447.9_394-S    | -20.1057 | -1.67 | Pmm2          | XM_147219.1 | Mus musculus phosphomannomutase 2 (Pmm2), mRNA.                                            |
| sci000496.1_7-S     | -20.1008 | -3.61 | Tpt1h         | NM_153597.1 | Mus musculus tRNA splicing 2 phosphotransferase 1 homolog (S. cerevisiae) (Tpt1h), mRNA.   |
| sci33059.9.1_102-S  | -20.0825 | -1.44 | Kptn          | NM_133727.1 | Mus musculus kaptin (Kptn), mRNA.                                                          |
| sci18523.10_225-S   | -20.0703 | -1.46 | 2310001A20Rik | NM_027977.1 | Mus musculus RIKEN cDNA 2310001A20 gene (2310001A20Rik), mRNA.                             |
| sci00192287.1_146-S | -20.0526 | -3.6  | C330005L02Rik | NM_138756.2 | Mus musculus RIKEN cDNA C330005L02 gene (C330005L02Rik), mRNA.                             |
| sci50681.9.1_22-S   | -20.0414 | -1.2  | D17Wsu94e     | NM_145353.1 | Mus musculus DNA segment, Chr 17, Wayne State University 94, expressed (D17Wsu94e), mRNA.  |
| sci069668.1_14-S    | -20.0397 | -1.27 | 2310061I09Rik | XM_129811.2 | Mus musculus RIKEN cDNA 2310061I09 gene (2310061I09Rik), mRNA.                             |
| sci27078.4.1_81-S   | -20.03   | -1.22 | 0910001L09Rik | XM_132434.2 | Mus musculus RIKEN cDNA 0910001L09 gene (0910001L09Rik), mRNA.                             |
| sci016202.8_23-S    | -20.0293 | -1.44 | Ilk           | NM_010562.1 | Mus musculus integrin linked kinase (Ilk), mRNA.                                           |
| sci00319263.1_175-S | -20.0292 | -1.67 | A030012M09Rik | NM_183028.1 | Mus musculus RIKEN cDNA A030012M09 gene (A030012M09Rik), mRNA.                             |

TABLE A6

## GENMAPPS AND GENE ONTOLOGIES SIGNIFICANTLY CHANGED BY THE ATHEROGENIC DIET IN HEARTS

## UP-REGULATED - GENMAPP

| No. | MAPP Name                                    | Number Changed | Number Measured | Number on MAPP | Percent Changed | Percent Present | Z Score | Permuted P Value |
|-----|----------------------------------------------|----------------|-----------------|----------------|-----------------|-----------------|---------|------------------|
| 1   | Mm_Fatty_Acid_Beta_Oxidation_1_BiGCaT        | 10             | 26              | 27             | 38.4615         | 96.2963         | 4.8100  | 0.0000           |
| 2   | Mm_Fatty_Acid_Beta_Oxidation_Meta_BiGCaT     | 11             | 31              | 32             | 35.4839         | 96.8750         | 4.7030  | 0.0000           |
| 3   | Mm_Delta-Notch_NetPath_3                     | 19             | 77              | 80             | 24.6753         | 96.2500         | 4.2780  | 0.0000           |
| 4   | Mm_Fatty_acid_metabolism                     | 14             | 50              | 66             | 28.0000         | 75.7576         | 4.2210  | 0.0000           |
| 5   | Mm_TNF-alpha-NF-kB_NetPath_9                 | 31             | 166             | 176            | 18.6747         | 94.3182         | 3.7330  | 0.0000           |
| 6   | Mm_Valine_leucine_and_isoleucine_degradation | 9              | 26              | 44             | 34.6154         | 59.0909         | 4.1570  | 0.0020           |
| 7   | Mm_Glutamate_metabolism                      | 5              | 13              | 40             | 38.4615         | 32.5000         | 3.3960  | 0.0020           |
| 8   | Mm_Mitochondrial_fatty_acid_betaoxidation    | 6              | 16              | 16             | 37.5000         | 100.0000        | 3.6410  | 0.0040           |
| 9   | Mm_Translation_Factors                       | 12             | 49              | 50             | 24.4898         | 98.0000         | 3.3580  | 0.0050           |
| 10  | Mm_Heme_Biosynthesis                         | 4              | 9               | 9              | 44.4444         | 100.0000        | 3.4200  | 0.0090           |
| 11  | Mm mRNA processing binding Reactome          | 59             | 426             | 551            | 13.8498         | 77.3140         | 2.6980  | 0.0090           |

## UP-REGULATED - GENE ONTOLOGY

| No. | GO Name                                                                      | GO Type | Number Changed | Number Measured | Number in GO | Percent Changed | Percent Present | Z Score | Permuted P Value |
|-----|------------------------------------------------------------------------------|---------|----------------|-----------------|--------------|-----------------|-----------------|---------|------------------|
| 1   | cellular physiological process                                               | P       | 871            | 8916            | 10403        | 9.7690          | 85.7061         | 7.5060  | 0.0000           |
| 2   | metabolism                                                                   | P       | 682            | 6705            | 7938         | 10.1715         | 84.4671         | 7.1510  | 0.0000           |
| 3   | ubiquitin cycle                                                              | P       | 69             | 437             | 511          | 15.7895         | 85.5186         | 5.6690  | 0.0000           |
| 4   | protein modification                                                         | P       | 177            | 1476            | 1665         | 11.9919         | 88.6487         | 5.2710  | 0.0000           |
| 5   | protein metabolism                                                           | P       | 308            | 2842            | 3423         | 10.8374         | 83.0266         | 5.2510  | 0.0000           |
| 6   | NLS-bearing substrate import into nucleus                                    | P       | 4              | 7               | 7            | 57.1429         | 100.0000        | 4.6550  | 0.0000           |
| 7   | fatty acid metabolism                                                        | P       | 28             | 156             | 164          | 17.9487         | 95.1220         | 4.3330  | 0.0000           |
| 8   | chromosome organization and biogenesis                                       | P       | 41             | 272             | 354          | 15.0735         | 76.8362         | 4.0170  | 0.0000           |
| 9   | chromatin modification                                                       | P       | 22             | 125             | 133          | 17.6000         | 93.9850         | 3.7330  | 0.0000           |
| 10  | chromosome organization and biogenesis (sensu Eukaryota)                     | P       | 37             | 251             | 332          | 14.7410         | 75.6024         | 3.6650  | 0.0000           |
| 11  | protein ubiquitination                                                       | P       | 24             | 147             | 173          | 16.3265         | 84.9711         | 3.4910  | 0.0000           |
| 12  | protein catabolism                                                           | P       | 29             | 190             | 215          | 15.2632         | 88.3721         | 3.4430  | 0.0000           |
| 13  | RNA processing                                                               | P       | 44             | 329             | 371          | 13.3739         | 88.6792         | 3.3020  | 0.0000           |
| 14  | RNA splicing                                                                 | P       | 23             | 144             | 167          | 15.9722         | 86.2276         | 3.3010  | 0.0000           |
| 15  | protein transport                                                            | P       | 70             | 589             | 654          | 11.8846         | 90.0612         | 3.1280  | 0.0000           |
| 16  | heme biosynthesis                                                            | P       | 5              | 11              | 11           | 45.4545         | 100.0000        | 4.4370  | 0.0010           |
| 17  | proteasomal ubiquitin-dependent protein catabolism                           | P       | 7              | 20              | 22           | 35.0000         | 90.9091         | 4.2970  | 0.0010           |
| 18  | regulation of fatty acid metabolism                                          | P       | 4              | 8               | 8            | 50.0000         | 100.0000        | 4.2480  | 0.0010           |
| 19  | ER-associated protein catabolism                                             | P       | 5              | 12              | 12           | 41.6667         | 100.0000        | 4.1610  | 0.0010           |
| 20  | translational elongation                                                     | P       | 7              | 23              | 28           | 30.4348         | 82.1429         | 3.8180  | 0.0010           |
| 21  | transport                                                                    | P       | 255            | 2540            | 2884         | 10.0394         | 88.0721         | 3.3070  | 0.0010           |
| 22  | protein localization                                                         | P       | 74             | 644             | 714          | 11.4907         | 90.1961         | 2.9080  | 0.0010           |
| 23  | glucocorticoid receptor signaling pathway                                    | P       | 3              | 4               | 4            | 75.0000         | 100.0000        | 4.8070  | 0.0020           |
| 24  | electron transport                                                           | P       | 51             | 386             | 461          | 13.2124         | 83.7310         | 3.4680  | 0.0020           |
| 25  | generation of precursor metabolites and energy                               | P       | 73             | 598             | 722          | 12.2074         | 82.8255         | 3.4430  | 0.0020           |
| 26  | mRNA metabolism                                                              | P       | 28             | 196             | 223          | 14.2857         | 87.8924         | 3.0010  | 0.0020           |
| 27  | lipid metabolism                                                             | P       | 68             | 581             | 616          | 11.7040         | 94.3182         | 2.9450  | 0.0020           |
| 28  | protein import into nucleus                                                  | P       | 13             | 65              | 72           | 20.0000         | 90.2778         | 3.3860  | 0.0030           |
| 29  | Notch signaling pathway                                                      | P       | 9              | 39              | 43           | 23.0769         | 90.6977         | 3.3150  | 0.0030           |
| 30  | establishment of protein localization                                        | P       | 70             | 617             | 684          | 11.3452         | 90.2047         | 2.7100  | 0.0030           |
| 31  | nuclear mRNA splicing\, via spliceosome                                      | P       | 18             | 118             | 135          | 15.2542         | 87.4074         | 2.7030  | 0.0030           |
| 32  | protein amino acid C-linked glycosylation via 2'-alpha-mannosyl-L-tryptophan | P       | 2              | 2               | 2            | 100.0000        | 100.0000        | 4.6750  | 0.0040           |
| 33  | protein amino acid O-linked mannosylation                                    | P       | 2              | 2               | 2            | 100.0000        | 100.0000        | 4.6750  | 0.0040           |
| 34  | Golgi organization and biogenesis                                            | P       | 4              | 9               | 9            | 44.4444         | 100.0000        | 3.9040  | 0.0040           |
| 35  | fatty acid beta-oxidation                                                    | P       | 6              | 20              | 20           | 30.0000         | 100.0000        | 3.4900  | 0.0040           |
| 36  | ubiquitin-dependent protein catabolism                                       | P       | 22             | 132             | 149          | 16.6667         | 88.5906         | 3.4480  | 0.0040           |
| 37  | fatty acid oxidation                                                         | P       | 8              | 32              | 32           | 25.0000         | 100.0000        | 3.3950  | 0.0040           |
| 38  | nucleobase\, nucleoside\, nucleotide and nucleic acid metabolism             | P       | 273            | 2803            | 3355         | 9.7396          | 83.5469         | 2.8760  | 0.0050           |
| 39  | RNA elongation                                                               | P       | 4              | 10              | 10           | 40.0000         | 100.0000        | 3.6080  | 0.0070           |
| 40  | malate metabolism                                                            | P       | 3              | 6               | 6            | 50.0000         | 100.0000        | 3.6780  | 0.0090           |
| 41  | translational initiation                                                     | P       | 11             | 58              | 72           | 18.9655         | 80.5556         | 2.9130  | 0.0090           |
| 42  | binding                                                                      | F       | 864            | 9101            | 10565        | 9.4935          | 86.1429         | 6.1730  | 0.0000           |
| 43  | nucleotide binding                                                           | F       | 212            | 1750            | 1959         | 12.1143         | 89.3313         | 5.9960  | 0.0000           |
| 44  | catalytic activity                                                           | F       | 485            | 4686            | 5420         | 10.3500         | 86.4576         | 5.8780  | 0.0000           |
| 45  | translation regulator activity                                               | F       | 28             | 127             | 151          | 22.0473         | 84.1060         | 5.5790  | 0.0000           |
| 46  | acyl-CoA dehydrogenase activity                                              | F       | 7              | 16              | 16           | 43.7500         | 100.0000        | 5.1070  | 0.0000           |
| 47  | ubiquitin-protein ligase activity                                            | F       | 39             | 219             | 259          | 17.8082         | 84.5560         | 5.0690  | 0.0000           |
| 48  | molybdenum ion binding                                                       | F       | 3              | 4               | 4            | 75.0000         | 100.0000        | 4.8070  | 0.0000           |
| 49  | ligase activity                                                              | F       | 56             | 382             | 449          | 14.6597         | 85.0780         | 4.4830  | 0.0000           |
| 50  | translation elongation factor activity                                       | F       | 10             | 34              | 37           | 29.4118         | 91.8919         | 4.4290  | 0.0000           |
| 51  | ATP binding                                                                  | F       | 137            | 1180            | 1331         | 11.6102         | 88.6551         | 4.1680  | 0.0000           |
| 52  | protein binding                                                              | F       | 457            | 4715            | 5185         | 9.6925          | 90.9354         | 3.9290  | 0.0000           |
| 53  | ATPase activity                                                              | F       | 45             | 312             | 360          | 14.4231         | 86.6667         | 3.8890  | 0.0000           |
| 54  | RNA binding                                                                  | F       | 61             | 466             | 548          | 13.0901         | 85.0365         | 3.7240  | 0.0000           |
| 55  | oxidoreductase activity                                                      | F       | 81             | 662             | 775          | 12.2357         | 85.4194         | 3.6580  | 0.0000           |
| 56  | enzyme binding                                                               | F       | 28             | 179             | 198          | 15.6425         | 90.4040         | 3.5250  | 0.0000           |
| 57  | transcription factor binding                                                 | F       | 42             | 325             | 350          | 12.9231         | 92.8571         | 2.9850  | 0.0000           |
| 58  | cytochrome-c oxidase activity                                                | F       | 7              | 21              | 27           | 33.3333         | 77.7778         | 4.1280  | 0.0010           |
| 59  | malic enzyme activity                                                        | F       | 3              | 4               | 4            | 75.0000         | 100.0000        | 4.8070  | 0.0020           |
| 60  | magnesium ion binding                                                        | F       | 37             | 253             | 273          | 14.6245         | 92.6740         | 3.6120  | 0.0020           |
| 61  | nucleic acid binding                                                         | F       | 268            | 2709            | 3327         | 9.8929          | 81.4247         | 3.1350  | 0.0020           |
| 62  | FAD binding                                                                  | F       | 7              | 26              | 28           | 26.9231         | 92.8571         | 3.4130  | 0.0030           |
| 63  | metal ion binding                                                            | F       | 285            | 2924            | 3379         | 9.7469          | 86.5345         | 2.9680  | 0.0030           |
| 64  | zinc ion binding                                                             | F       | 161            | 1556            | 1866         | 10.3470         | 83.3869         | 2.9530  | 0.0040           |
| 65  | voltage-gated ion-selective channel activity                                 | F       | 3              | 4               | 5            | 75.0000         | 80.0000         | 4.8070  | 0.0050           |
| 66  | electron transporter activity                                                | F       | 25             | 175             | 195          | 14.2857         | 89.7436         | 2.8330  | 0.0050           |
| 67  | long-chain-acyl-CoA dehydrogenase activity                                   | F       | 2              | 2               | 2            | 100.0000        | 100.0000        | 4.6750  | 0.0060           |
| 68  | ATPase activity\, coupled                                                    | F       | 35             | 266             | 301          | 13.1579         | 88.3721         | 2.8340  | 0.0060           |
| 69  | myosin light chain kinase activity                                           | F       | 2              | 2               | 3            | 100.0000        | 66.6667         | 4.6750  | 0.0070           |
| 70  | Rab GDP-dissociation inhibitor activity                                      | F       | 2              | 2               | 2            | 100.0000        | 100.0000        | 4.6750  | 0.0070           |

|     |                                                      |   |     |      |      |          |          |        |        |
|-----|------------------------------------------------------|---|-----|------|------|----------|----------|--------|--------|
| 71  | vascular endothelial growth factor receptor activity | F | 5   | 13   | 13   | 38.4615  | 100.0000 | 3.9140 | 0.0080 |
| 72  | 2 iron, 2 sulfur cluster binding                     | F | 4   | 10   | 11   | 40.0000  | 90.9091  | 3.6080 | 0.0080 |
| 73  | translation initiation factor activity               | F | 12  | 66   | 86   | 18.1818  | 76.7442  | 2.8780 | 0.0080 |
| 74  | helicase activity                                    | F | 18  | 121  | 136  | 14.8760  | 88.9706  | 2.5870 | 0.0080 |
| 75  | aldehyde oxidase activity                            | F | 2   | 2    | 2    | 100.0000 | 100.0000 | 4.6750 | 0.0090 |
| 76  | intracellular                                        | C | 740 | 6933 | 8118 | 10.6736  | 85.4028  | 9.4510 | 0.0000 |
| 77  | cytoplasm                                            | C | 427 | 3484 | 3969 | 12.2560  | 87.7803  | 9.4350 | 0.0000 |
| 78  | mitochondrion                                        | C | 118 | 730  | 822  | 16.1644  | 88.8078  | 7.7790 | 0.0000 |
| 79  | mitochondrial envelope                               | C | 52  | 280  | 329  | 18.5714  | 85.1064  | 6.2090 | 0.0000 |
| 80  | protein complex                                      | C | 212 | 1750 | 2202 | 12.1143  | 79.4732  | 5.9960 | 0.0000 |
| 81  | mitochondrial membrane                               | C | 46  | 262  | 308  | 17.5573  | 85.0649  | 5.4050 | 0.0000 |
| 82  | cytosol                                              | C | 53  | 344  | 383  | 15.4070  | 89.8172  | 4.7550 | 0.0000 |
| 83  | mitochondrial inner membrane                         | C | 38  | 232  | 275  | 16.3793  | 84.3636  | 4.4280 | 0.0000 |
| 84  | mitochondrial electron transport chain               | C | 9   | 30   | 40   | 30.0000  | 75.0000  | 4.2760 | 0.0000 |
| 85  | nucleus                                              | C | 333 | 3274 | 3798 | 10.1710  | 86.2033  | 4.1810 | 0.0000 |
| 86  | ATP-binding cassette (ABC) transporter complex       | C | 4   | 8    | 8    | 50.0000  | 100.0000 | 4.2480 | 0.0010 |
| 87  | Golgi apparatus                                      | C | 54  | 435  | 471  | 12.4138  | 92.3567  | 3.0780 | 0.0010 |
| 88  | eukaryotic translation initiation factor 3 complex   | C | 3   | 5    | 5    | 60.0000  | 100.0000 | 4.1650 | 0.0020 |
| 89  | endoplasmic reticulum                                | C | 62  | 528  | 561  | 11.7424  | 94.1177  | 2.8350 | 0.0020 |
| 90  | respiratory chain complex IV (sensu Eukaryota)       | C | 3   | 4    | 4    | 75.0000  | 100.0000 | 4.8070 | 0.0030 |
| 91  | mannosyltransferase complex                          | C | 2   | 2    | 2    | 100.0000 | 100.0000 | 4.6750 | 0.0040 |
| 92  | transcription elongation factor complex              | C | 3   | 5    | 5    | 60.0000  | 100.0000 | 4.1650 | 0.0040 |
| 93  | mitochondrial outer membrane                         | C | 8   | 30   | 33   | 26.6667  | 90.9091  | 3.6160 | 0.0040 |
| 94  | cellular component unknown                           | C | 46  | 368  | 404  | 12.5000  | 91.0891  | 2.8840 | 0.0040 |
| 95  | endoplasmic reticulum membrane                       | C | 18  | 104  | 109  | 17.3077  | 95.4128  | 3.2950 | 0.0060 |
| 96  | nuclear envelope                                     | C | 16  | 97   | 111  | 16.4948  | 87.3874  | 2.8910 | 0.0060 |
| 97  | exocyst                                              | C | 3   | 6    | 6    | 50.0000  | 100.0000 | 3.6780 | 0.0070 |
| 98  | flotillin complex                                    | C | 2   | 2    | 2    | 100.0000 | 100.0000 | 4.6750 | 0.0080 |
| 99  | eukaryotic translation elongation factor 1 complex   | C | 3   | 6    | 6    | 50.0000  | 100.0000 | 3.6780 | 0.0080 |
| 100 | DNA-directed RNA polymerase I complex                | C | 3   | 5    | 5    | 60.0000  | 100.0000 | 4.1650 | 0.0090 |
| 101 | mitochondrial ribosome                               | C | 8   | 35   | 37   | 22.8571  | 94.5946  | 3.0930 | 0.0090 |
| 102 | mitochondrial matrix                                 | C | 13  | 74   | 76   | 17.5676  | 97.3684  | 2.8570 | 0.0090 |
| 103 | microtubule                                          | C | 21  | 143  | 166  | 14.6853  | 86.1446  | 2.7320 | 0.0090 |

**DOWN-REGULATED - GENMAPP**

| No. | MAPP Name                                       | Number Changed | Number Measured | Number on MAPP | Percent Changed | Percent Present | Z Score | Permuted P Value |
|-----|-------------------------------------------------|----------------|-----------------|----------------|-----------------|-----------------|---------|------------------|
| 1   | Mm_Ribosomal_Proteins                           | 18             | 78              | 80             | 23.0769         | 97.5000         | 4.8800  | 0.0000           |
| 2   | Mm_Proteasome_Degradation                       | 16             | 73              | 81             | 21.9178         | 90.1235         | 4.3530  | 0.0000           |
| 3   | Mm_Glycolysis_and_Gluconeogenesis               | 11             | 42              | 42             | 26.1905         | 100.0000        | 4.3080  | 0.0000           |
| 4   | Mm_Circadian_Exercise                           | 10             | 48              | 49             | 20.8333         | 97.9592         | 3.2430  | 0.0020           |
| 5   | Mm_Translation_Factors                          | 11             | 49              | 50             | 22.4490         | 98.0000         | 3.6930  | 0.0030           |
| 6   | Mm_Glycolysis_Gluconeogenesis                   | 10             | 42              | 61             | 23.8095         | 68.8525         | 3.7410  | 0.0040           |
| 7   | Mm_Tetrachloroethene_degradation                | 3              | 5               | 12             | 60.0000         | 41.6667         | 4.2490  | 0.0050           |
| 8   | Mm_Unsaturated_Fatty_Acid_Beta_Oxidation_BiGCaT | 3              | 6               | 6              | 50.0000         | 100.0000        | 3.7580  | 0.0060           |
| 9   | Mm_Alanine_and_aspartate_metabolism             | 5              | 13              | 42             | 38.4615         | 30.9524         | 4.0110  | 0.0070           |
| 10  | Mm_mRNA_processing_binding_Reactome             | 49             | 426             | 551            | 11.5024         | 77.3140         | 2.6920  | 0.0090           |

**DOWN-REGULATED - GENE ONTOLOGY**

| No. | GO Name                                              | GO Type | Number Changed | Number Measured | Number in GO | Percent Changed | Percent Present | Z Score | Permuted P Value |
|-----|------------------------------------------------------|---------|----------------|-----------------|--------------|-----------------|-----------------|---------|------------------|
| 1   | metabolism                                           | P       | 486            | 6706            | 7938         | 7.2472          | 84.4797         | 7.3550  | 0.0000           |
| 2   | biosynthesis                                         | P       | 121            | 1154            | 1428         | 10.4853         | 80.8123         | 7.2840  | 0.0000           |
| 3   | cellular physiological process                       | P       | 598            | 8917            | 10403        | 6.7063          | 85.7157         | 6.4600  | 0.0000           |
| 4   | protein metabolism                                   | P       | 234            | 2843            | 3423         | 8.2307          | 83.0558         | 6.4510  | 0.0000           |
| 5   | protein biosynthesis                                 | P       | 69             | 588             | 801          | 11.7347         | 73.4082         | 6.4270  | 0.0000           |
| 6   | proteasomal ubiquitin-dependent protein catabolism   | P       | 7              | 20              | 22           | 35.0000         | 90.9091         | 5.6500  | 0.0000           |
| 7   | ubiquitin-dependent protein catabolism               | P       | 21             | 132             | 149          | 15.9091         | 88.5906         | 5.0740  | 0.0000           |
| 8   | intracellular transport                              | P       | 66             | 648             | 740          | 10.1852         | 87.5676         | 5.0230  | 0.0000           |
| 9   | protein polymerization                               | P       | 10             | 43              | 50           | 23.2558         | 86.0000         | 4.9660  | 0.0000           |
| 10  | purine nucleotide biosynthesis                       | P       | 13             | 75              | 96           | 17.3333         | 78.1250         | 4.3500  | 0.0000           |
| 11  | protein folding                                      | P       | 25             | 200             | 227          | 12.5000         | 88.1057         | 4.1680  | 0.0000           |
| 12  | generation of precursor metabolites and energy       | P       | 57             | 598             | 722          | 9.5318          | 82.8255         | 4.1130  | 0.0000           |
| 13  | ubiquitin cycle                                      | P       | 42             | 437             | 511          | 9.6110          | 85.5186         | 3.5690  | 0.0000           |
| 14  | actin filament severing                              | P       | 3              | 5               | 5            | 60.0000         | 100.0000        | 5.2330  | 0.0010           |
| 15  | glycolysis                                           | P       | 10             | 48              | 78           | 20.8333         | 61.5385         | 4.5230  | 0.0010           |
| 16  | regulation of translational initiation               | P       | 7              | 30              | 30           | 23.3333         | 100.0000        | 4.1650  | 0.0010           |
| 17  | ATP synthesis coupled proton transport               | P       | 9              | 45              | 60           | 20.0000         | 75.0000         | 4.1380  | 0.0010           |
| 18  | protein transport                                    | P       | 56             | 589             | 654          | 9.5076          | 90.0612         | 4.0550  | 0.0010           |
| 19  | translation                                          | P       | 21             | 168             | 201          | 12.5000         | 83.5821         | 3.8150  | 0.0010           |
| 20  | protein catabolism                                   | P       | 22             | 190             | 215          | 11.5790         | 88.3721         | 3.5100  | 0.0010           |
| 21  | actin cytoskeleton organization and biogenesis       | P       | 20             | 163             | 171          | 12.2699         | 95.3216         | 3.6300  | 0.0020           |
| 22  | ER to Golgi vesicle-mediated transport               | P       | 9              | 53              | 59           | 16.9811         | 89.8305         | 3.5430  | 0.0020           |
| 23  | RNA splicing                                         | P       | 18             | 144             | 167          | 12.5000         | 86.2276         | 3.5300  | 0.0020           |
| 24  | muscle development                                   | P       | 18             | 149             | 161          | 12.0805         | 92.5466         | 3.3690  | 0.0020           |
| 25  | succinyl-CoA metabolism                              | P       | 2              | 2               | 2            | 100.0000        | 100.0000        | 5.7480  | 0.0030           |
| 26  | intracellular protein transport                      | P       | 40             | 415             | 463          | 9.6386          | 89.6328         | 3.5000  | 0.0030           |
| 27  | glucose metabolism                                   | P       | 13             | 100             | 135          | 13.0000         | 74.0741         | 3.1530  | 0.0030           |
| 28  | protein modification                                 | P       | 109            | 1476            | 1665         | 7.3848          | 88.6487         | 2.9250  | 0.0030           |
| 29  | barbed-end actin filament capping                    | P       | 5              | 21              | 21           | 23.8095         | 100.0000        | 3.5770  | 0.0040           |
| 30  | mRNA processing                                      | P       | 19             | 173             | 198          | 10.9827         | 87.3737         | 3.0070  | 0.0040           |
| 31  | regulation of progression through cell cycle         | P       | 35             | 375             | 410          | 9.3333          | 91.4634         | 3.0640  | 0.0050           |
| 32  | purine ribonucleoside salvage                        | P       | 2              | 3               | 3            | 66.6667         | 100.0000        | 4.5510  | 0.0080           |
| 33  | actin filament polymerization                        | P       | 5              | 25              | 27           | 20.0000         | 92.5926         | 3.0820  | 0.0080           |
| 34  | proton transport                                     | P       | 10             | 74              | 92           | 13.5135         | 80.4348         | 2.9010  | 0.0080           |
| 35  | cell growth                                          | P       | 15             | 135             | 143          | 11.1111         | 94.4056         | 2.7180  | 0.0080           |
| 36  | mitotic spindle assembly                             | P       | 2              | 3               | 4            | 66.6667         | 75.0000         | 4.5510  | 0.0090           |
| 37  | SMAD protein nuclear translocation                   | P       | 2              | 3               | 3            | 66.6667         | 100.0000        | 4.5510  | 0.0090           |
| 38  | mitochondrial electron transport, NADH to ubiquinone | P       | 4              | 14              | 25           | 28.5714         | 56.0000         | 3.6890  | 0.0090           |
| 39  | unfolded protein response                            | P       | 3              | 9               | 9            | 33.3333         | 100.0000        | 3.5730  | 0.0090           |
| 40  | protein amino acid methylation                       | P       | 5              | 23              | 25           | 21.7391         | 92.0000         | 3.3160  | 0.0090           |
| 41  | structural constituent of ribosome                   | F       | 36             | 183             | 354          | 19.6721         | 51.6949         | 8.1920  | 0.0000           |



|    |                                                                                                  |   |     |      |      |          |          |         |        |
|----|--------------------------------------------------------------------------------------------------|---|-----|------|------|----------|----------|---------|--------|
| 42 | structural molecule activity                                                                     | F | 65  | 632  | 893  | 10.2848  | 70.7727  | 5.0680  | 0.0000 |
| 43 | RNA binding                                                                                      | F | 51  | 466  | 548  | 10.9442  | 85.0365  | 4.9500  | 0.0000 |
| 44 | NADH dehydrogenase activity                                                                      | F | 8   | 31   | 43   | 25.8065  | 72.0930  | 4.8280  | 0.0000 |
| 45 | protein binding                                                                                  | F | 326 | 4716 | 5185 | 6.9126   | 90.9547  | 4.3200  | 0.0000 |
| 46 | unfolded protein binding                                                                         | F | 20  | 146  | 159  | 13.6986  | 91.8239  | 4.1810  | 0.0000 |
| 47 | actin binding                                                                                    | F | 24  | 207  | 230  | 11.5942  | 90.0000  | 3.6750  | 0.0000 |
| 48 | nucleotide binding                                                                               | F | 133 | 1750 | 1959 | 7.6000   | 89.3313  | 3.6320  | 0.0000 |
| 49 | catalytic activity                                                                               | F | 313 | 4686 | 5420 | 6.6795   | 86.4576  | 3.4670  | 0.0000 |
| 50 | cytoskeletal protein binding                                                                     | F | 32  | 315  | 344  | 10.1587  | 91.5698  | 3.4410  | 0.0000 |
| 51 | threonine endopeptidase activity                                                                 | F | 6   | 18   | 21   | 33.3333  | 85.7143  | 5.0540  | 0.0010 |
| 52 | NADH dehydrogenase (ubiquinone) activity                                                         | F | 7   | 27   | 39   | 25.9259  | 69.2308  | 4.5320  | 0.0010 |
| 53 | hydrogen-transporting ATPase activity\, rotational mechanism                                     | F | 9   | 45   | 58   | 20.0000  | 77.5862  | 4.1380  | 0.0010 |
| 54 | translation regulator activity                                                                   | F | 16  | 127  | 151  | 12.5984  | 84.1060  | 3.3610  | 0.0010 |
| 55 | electron carrier activity                                                                        | F | 10  | 67   | 80   | 14.9254  | 83.7500  | 3.2590  | 0.0010 |
| 56 | thioredoxin peroxidase activity                                                                  | F | 2   | 2    | 2    | 100.0000 | 100.0000 | 5.7480  | 0.0020 |
| 57 | antioxidant activity                                                                             | F | 9   | 51   | 56   | 17.6471  | 91.0714  | 3.6810  | 0.0030 |
| 58 | hydrogen-transporting ATP synthase activity\, rotational mechanism                               | F | 8   | 43   | 56   | 18.6047  | 76.7857  | 3.6500  | 0.0030 |
| 59 | GTP binding                                                                                      | F | 31  | 301  | 335  | 10.2990  | 89.8508  | 3.4680  | 0.0040 |
| 60 | oxidoreductase activity                                                                          | F | 56  | 662  | 775  | 8.4592   | 85.4194  | 3.1210  | 0.0040 |
| 61 | ligase activity                                                                                  | F | 35  | 382  | 449  | 9.1623   | 85.0780  | 2.9470  | 0.0040 |
| 62 | glucuronosyl-N-acetylglucosaminyl-proteoglycan 4-alpha-N-acetylglucosaminyltransferase activity  | F | 2   | 2    | 2    | 100.0000 | 100.0000 | 5.7480  | 0.0050 |
| 63 | structural constituent of cytoskeleton                                                           | F | 11  | 84   | 98   | 13.0952  | 85.7143  | 2.9260  | 0.0050 |
| 64 | 6-phosphofructokinase activity                                                                   | F | 2   | 3    | 3    | 66.6667  | 100.0000 | 4.5510  | 0.0060 |
| 65 | protein serine/threonine phosphatase activity                                                    | F | 6   | 32   | 36   | 18.7500  | 88.8889  | 3.1830  | 0.0060 |
| 66 | ATPase activity\, coupled to transmembrane movement of substances                                | F | 16  | 134  | 158  | 11.9403  | 84.8101  | 3.1230  | 0.0060 |
| 67 | hydrolase activity\, acting on acid anhydrides\, catalyzing transmembrane movement of substances | F | 16  | 136  | 161  | 11.7647  | 84.4721  | 3.0580  | 0.0070 |
| 68 | molecular function unknown                                                                       | F | 37  | 404  | 455  | 9.1584   | 88.7912  | 3.0300  | 0.0070 |
| 69 | carbonyl reductase (NADPH) activity                                                              | F | 2   | 3    | 4    | 66.6667  | 75.0000  | 4.5510  | 0.0080 |
| 70 | protein-L-isoaspartate (D-aspartate) O-methyltransferase activity                                | F | 2   | 3    | 3    | 66.6667  | 100.0000 | 4.5510  | 0.0090 |
| 71 | nucleoside-triphosphatase activity                                                               | F | 42  | 498  | 565  | 8.4337   | 88.1416  | 2.6660  | 0.0090 |
| 72 | cytoplasm                                                                                        | C | 351 | 3484 | 3969 | 10.0746  | 87.7803  | 12.7100 | 0.0000 |
| 73 | intracellular                                                                                    | C | 554 | 6934 | 8118 | 7.9896   | 85.4151  | 11.2500 | 0.0000 |
| 74 | mitochondrion                                                                                    | C | 103 | 730  | 822  | 14.1096  | 88.8078  | 10.0340 | 0.0000 |
| 75 | protein complex                                                                                  | C | 182 | 1751 | 2202 | 10.3941  | 79.5186  | 9.0010  | 0.0000 |
| 76 | ribosome                                                                                         | C | 35  | 176  | 345  | 19.8864  | 51.0145  | 8.1550  | 0.0000 |
| 77 | ribonucleoprotein complex                                                                        | C | 54  | 355  | 550  | 15.2113  | 64.5455  | 7.8110  | 0.0000 |
| 78 | tubulin                                                                                          | C | 3   | 3    | 3    | 100.0000 | 100.0000 | 7.0400  | 0.0000 |
| 79 | proteasome complex (sensu Eukaryota)                                                             | C | 11  | 37   | 42   | 29.7297  | 88.0952  | 6.3050  | 0.0000 |
| 80 | mitochondrial ribosome                                                                           | C | 10  | 35   | 37   | 28.5714  | 94.5946  | 5.8360  | 0.0000 |
| 81 | small ribosomal subunit                                                                          | C | 9   | 32   | 45   | 28.1250  | 71.1111  | 5.4710  | 0.0000 |
| 82 | mitochondrial envelope                                                                           | C | 35  | 280  | 329  | 12.5000  | 85.1064  | 4.9450  | 0.0000 |
| 83 | actin cytoskeleton                                                                               | C | 28  | 206  | 229  | 13.5922  | 89.9563  | 4.9110  | 0.0000 |
| 84 | mitochondrial matrix                                                                             | C | 14  | 74   | 76   | 18.9189  | 97.3684  | 4.9100  | 0.0000 |
| 85 | cytosol                                                                                          | C | 40  | 344  | 383  | 11.6279  | 89.8172  | 4.7880  | 0.0000 |
| 86 | mitochondrial inner membrane                                                                     | C | 30  | 232  | 275  | 12.9310  | 84.3636  | 4.7790  | 0.0000 |
| 87 | Arp2/3 protein complex                                                                           | C | 4   | 8    | 8    | 50.0000  | 100.0000 | 5.4010  | 0.0010 |
| 88 | proteasome core complex (sensu Eukaryota)                                                        | C | 6   | 18   | 21   | 33.3333  | 85.7143  | 5.0540  | 0.0010 |
| 89 | proton-transporting two-sector ATPase complex                                                    | C | 9   | 47   | 61   | 19.1489  | 77.0492  | 3.9770  | 0.0010 |
| 90 | proteasome regulatory particle (sensu Eukaryota)                                                 | C | 3   | 6    | 7    | 50.0000  | 85.7143  | 4.6770  | 0.0020 |
| 91 | large ribosomal subunit                                                                          | C | 7   | 29   | 42   | 24.1379  | 69.0476  | 4.2810  | 0.0020 |
| 92 | cytoskeleton                                                                                     | C | 63  | 742  | 859  | 8.4906   | 86.3795  | 3.3510  | 0.0020 |
| 93 | endoplasmic reticulum lumen                                                                      | C | 4   | 14   | 14   | 28.5714  | 100.0000 | 3.6890  | 0.0040 |
| 94 | endoplasmic reticulum                                                                            | C | 45  | 528  | 561  | 8.5227   | 94.1177  | 2.8380  | 0.0040 |
| 95 | 6-phosphofructokinase complex                                                                    | C | 2   | 3    | 3    | 66.6667  | 100.0000 | 4.5510  | 0.0060 |
| 96 | interleukin-1 receptor complex                                                                   | C | 2   | 3    | 3    | 66.6667  | 100.0000 | 4.5510  | 0.0080 |
| 97 | microvillus                                                                                      | C | 3   | 9    | 10   | 33.3333  | 90.0000  | 3.5730  | 0.0090 |
