# Supplementary material for: Oil palm phenolics attenuate changes caused by an atherogenic diet in mice
Source: Springer Nature journal article supplement (doi:10.1007/s00394-012-0346-0), 2012-04-10
Supplement: MOESM1 [file 8391004]

**Article Title:** Oil palm phenolics attenuate changes caused by an atherogenic diet in mice.

**Journal Name:** European Journal of Nutrition.

**Author Names:** Soon-Sen Leow, Shamala Devi Sekaran, Kalyana Sundram, YewAi Tan, Ravigadevi Sambanthamurthi.

**Corresponding Author:** Ravigadevi Sambanthamurthi; Malaysian Palm Oil Board, No. 6, Persiaran Institusi, Bandar Baru Bangi, 43000 Kajang, Selangor, Malaysia; E-mail: [raviga@mpob.gov.my](mailto:raviga@mpob.gov.my).

### **Supplementary Material 1**

This file contains the online resources (figures and tables) described in the main manuscript.

**Online Resource 1** Genes selected for the real-time qRT-PCR validation experiments

| Organ  | Symbol         | Definition                                                              | Accession | Assay ID      |
|--------|----------------|-------------------------------------------------------------------------|-----------|---------------|
| Liver  | <i>Herpud1</i> | <i>Mus musculus</i> ubiquitin-like domain member 1                      | NM_022331 | Mm00445600_m1 |
| Liver  | <i>Fads2</i>   | <i>Mus musculus</i> fatty acid desaturase 2                             | NM_019699 | Mm00517221_m1 |
| Spleen | <i>Anxa2</i>   | <i>Mus musculus</i> annexin A2                                          | NM_007585 | Mm00500307_m1 |
| Spleen | <i>Cfb</i>     | <i>Mus musculus</i> histocompatibility 2, complement component factor B | NM_008198 | Mm00433909_m1 |
| Heart  | <i>Fstl1</i>   | <i>Mus musculus</i> follistatin-like 1                                  | NM_008047 | Mm00433371_m1 |
| Heart  | <i>Alas2</i>   | <i>Mus musculus</i> aminolevulinic acid synthase 2, erythroid           | NM_009653 | Mm00802083_m1 |
| All    | <i>Sfrs9</i>   | <i>Mus musculus</i> splicing factor, arginine/serine rich 9             | NM_025573 | Mm00470546_m1 |
| All    | <i>Guk1</i>    | <i>Mus musculus</i> guanylate kinase 1                                  | NM_008193 | Mm00433888_m1 |
| All    | <i>Hnrpab</i>  | <i>Mus musculus</i> heterogeneous nuclear ribonucleoprotein A/B         | NM_010448 | Mm00468938_m1 |

These six target genes were selected based on their functional significance, their statistical significance, their presence as single splice transcripts in microarrays and their availability as Taqman assays designed across splice junctions. *Sfrs9*, *Guk1* and *Hnrpab* were used as housekeeping genes as their expression levels were found to be quite stable across treatments in each of the organs tested.

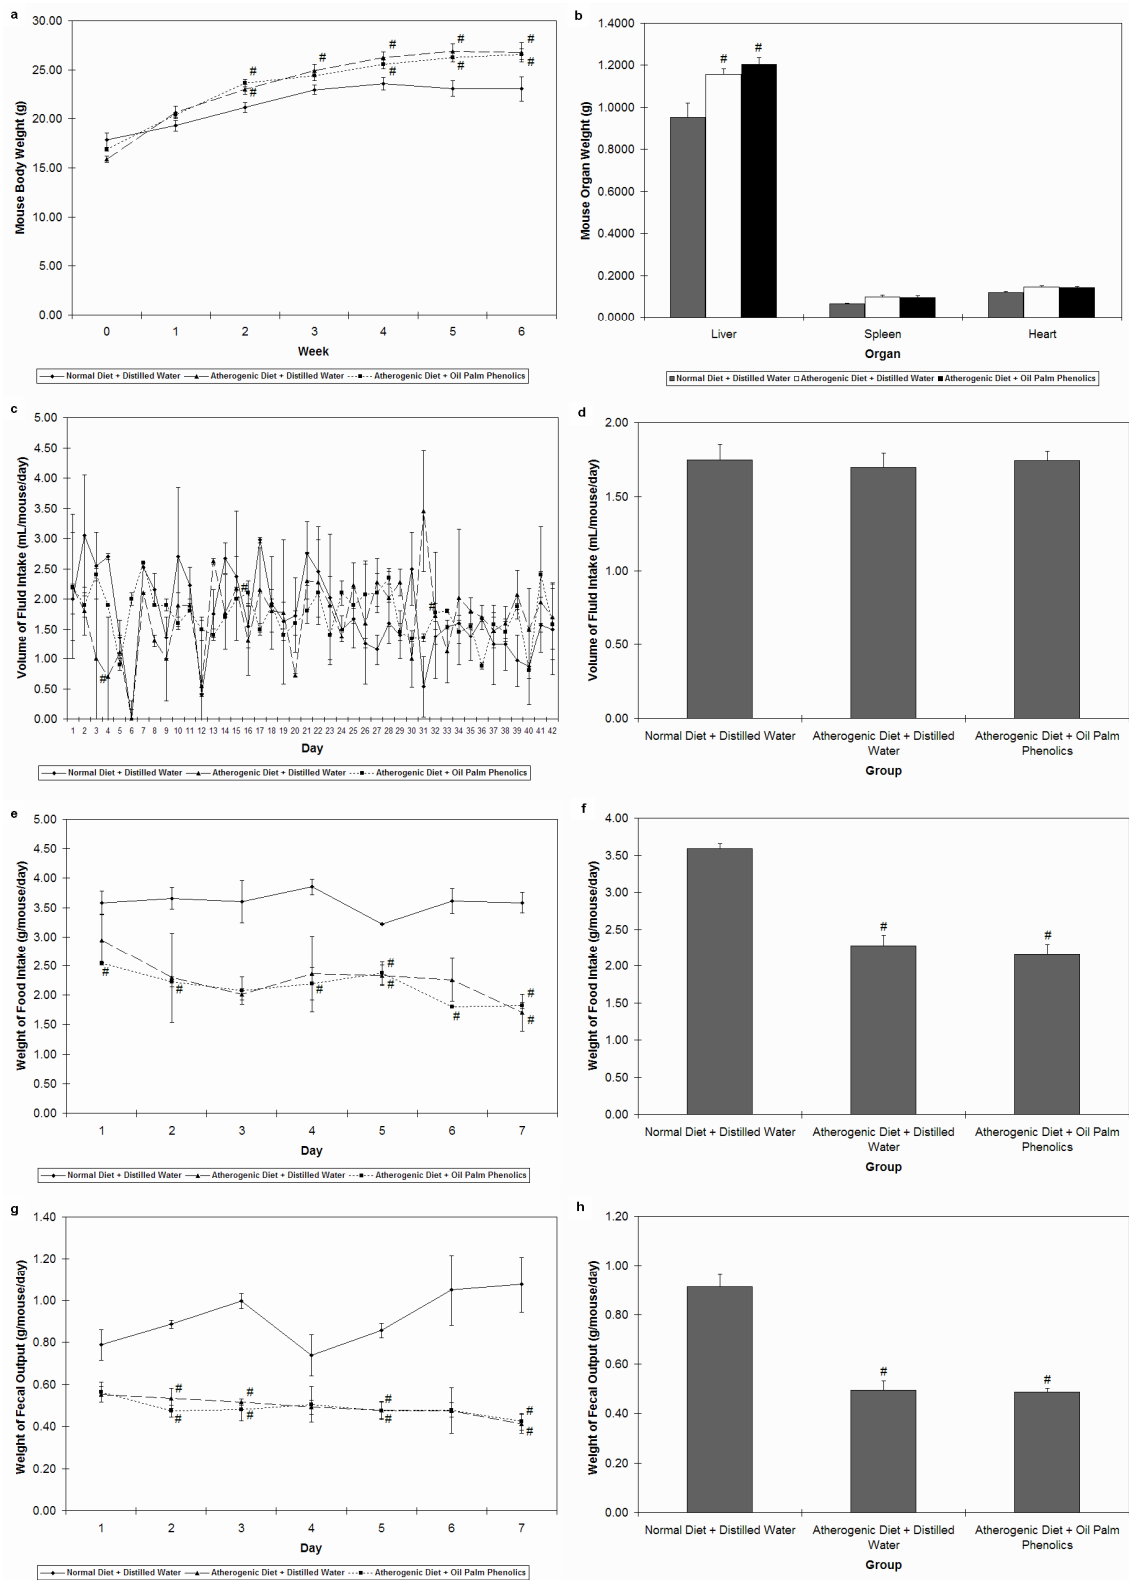

**Online Resource 2** Physiology parameters of mice. **a** Body weights;  $n = 10$ . **b** Organ weights;  $n = 10$ . **c** Timeline of fluid intake;  $n = 2$  cages (of 5 mice per cage). **d** Average daily fluid intake;  $n = 42$  days. **e** Timeline of food intake,  $n = 2$  cages (of 5 mice per cage). **f** Average daily food intake between week two to week three;  $n = 7$  days. **g** Timeline of fecal output,  $n = 2$  cages (of 5 mice per cage). **h** Average daily fecal output between week two to week three;  $n = 7$  days. #  $p < 0.05$  vs. Normal Diet + Distilled Water. Values are means  $\pm$  SEM

**Online Resource 3** Hematology and clinical biochemistry parameters of mouse blood samples

| Test                                            | Normal                       | Atherogenic                  | Atherogenic                     |
|-------------------------------------------------|------------------------------|------------------------------|---------------------------------|
|                                                 | Diet +<br>Distilled<br>Water | Diet +<br>Distilled<br>Water | Diet +<br>Oil Palm<br>Phenolics |
| Hematology                                      | (n = 4)                      | (n = 4)                      | (n = 4)                         |
| Red Blood Cells (X10 <sup>12</sup> /L)          | 9.93 ± 0.32 <sup>a</sup>     | 10.08 ± 0.21 <sup>a</sup>    | 10.02 ± 0.08 <sup>a</sup>       |
| Hemoglobin (g/L)                                | 148 ± 4 <sup>a</sup>         | 149 ± 3 <sup>a</sup>         | 149 ± 1 <sup>a</sup>            |
| Hematocrit / Packed Cell Volume (L/L)           | 0.40 ± 0.01 <sup>a</sup>     | 0.40 ± 0.02 <sup>a</sup>     | 0.40 ± 0.00 <sup>a</sup>        |
| Mean Corpuscular Volume (fL)                    | 41 ± 1 <sup>a</sup>          | 40 ± 1 <sup>a</sup>          | 40 ± 1 <sup>a</sup>             |
| Mean Corpuscular Hemoglobin Concentration (g/L) | 369 ± 6 <sup>a</sup>         | 373 ± 7 <sup>a</sup>         | 372 ± 5 <sup>a</sup>            |
| White Blood Cells (X10 <sup>9</sup> /L)         | 2.0 ± 0.6 <sup>a</sup>       | 3.3 ± 0.3 <sup>b</sup>       | 3.0 ± 0.1 <sup>b</sup>          |
| Band Neutrophils (X10 <sup>9</sup> /L)          | 0.05 ± 0.01 <sup>a</sup>     | 0.10 ± 0.02 <sup>b</sup>     | 0.10 ± 0.02 <sup>b</sup>        |
| Segmented Neutrophils (X10 <sup>9</sup> /L)     | 0.48 ± 0.17 <sup>a</sup>     | 0.83 ± 0.07 <sup>b</sup>     | 0.77 ± 0.06 <sup>b</sup>        |
| Lymphocytes (X10 <sup>9</sup> /L)               | 1.36 ± 0.38 <sup>a</sup>     | 2.06 ± 0.22 <sup>b</sup>     | 1.99 ± 0.17 <sup>b</sup>        |
| Monocytes (X10 <sup>9</sup> /L)                 | 0.09 ± 0.02 <sup>a</sup>     | 0.08 ± 0.04 <sup>a</sup>     | 0.09 ± 0.03 <sup>a</sup>        |
| Eosinophils (X10 <sup>9</sup> /L)               | 0.03 ± 0.01 <sup>a</sup>     | 0.06 ± 0.02 <sup>a</sup>     | 0.06 ± 0.03 <sup>a</sup>        |
| Basophils (X10 <sup>9</sup> /L)                 | 0.00 ± 0.00 <sup>a</sup>     | 0.00 ± 0.00 <sup>a</sup>     | 0.00 ± 0.00 <sup>a</sup>        |
| Thrombocytes (X10 <sup>9</sup> /L)              | 533 ± 111 <sup>a</sup>       | 644 ± 37 <sup>a</sup>        | 619 ± 21 <sup>a</sup>           |
| Prothrombin (g/L)                               | 79 ± 2 <sup>a</sup>          | 78 ± 2 <sup>a</sup>          | 79 ± 2 <sup>a</sup>             |
| Clinical Biochemistry                           | (n = 8)                      | (n = 8)                      | (n = 7)                         |
| Alanine Aminotransferase (U/L)                  | 34.4 ± 3.3 <sup>a</sup>      | 41.8 ± 10.7 <sup>a</sup>     | 32.2 ± 5.1 <sup>a</sup>         |
| Aspartate Aminotransferase (U/L)                | 175.2 ± 23.8 <sup>a</sup>    | 174.8 ± 29.3 <sup>a</sup>    | 157.2 ± 32.2 <sup>a</sup>       |
| Glucose (mmol/L)                                | 6.0 ± 1.1 <sup>a</sup>       | 5.3 ± 0.4 <sup>a,b</sup>     | 7.4 ± 0.4 <sup>a,c</sup>        |
| Serum Total Protein (g/L)                       | 53.8 ± 1.8 <sup>a</sup>      | 53.2 ± 0.9 <sup>a</sup>      | 54.8 ± 0.7 <sup>a</sup>         |
| Albumin (g/L)                                   | 34.0 ± 0.9 <sup>a</sup>      | 29.4 ± 0.7 <sup>b</sup>      | 31.0 ± 0.7 <sup>b</sup>         |
| Globulin (g/L)                                  | 19.8 ± 1.1 <sup>a</sup>      | 23.8 ± 0.7 <sup>b</sup>      | 23.7 ± 0.7 <sup>b</sup>         |
| Albumin:Globulin                                | 1.8 ± 0.1 <sup>a</sup>       | 1.2 ± 0.1 <sup>b</sup>       | 1.3 ± 0.1 <sup>b</sup>          |
| Total Cholesterol (mmol/L)                      | 3.46 ± 0.13 <sup>a</sup>     | 4.77 ± 0.15 <sup>b</sup>     | 4.76 ± 0.19 <sup>b</sup>        |
| Triglycerides (mmol/L)                          | 1.05 ± 0.08 <sup>a</sup>     | 1.13 ± 0.04 <sup>a</sup>     | 1.14 ± 0.15 <sup>a</sup>        |
| Low-Density Lipoproteins (LDL) (mmol/L)         | 0.15 ± 0.02 <sup>a</sup>     | 0.26 ± 0.03 <sup>b</sup>     | 0.30 ± 0.06 <sup>b</sup>        |
| High-Density Lipoproteins (HDL) (mmol/L)        | 2.79 ± 0.11 <sup>a</sup>     | 4.05 ± 0.11 <sup>b</sup>     | 3.93 ± 0.14 <sup>b</sup>        |

All data are expressed as means ± SEM. Means with different superscript letters are significantly different ( $p < 0.05$ ). Significant changes caused by the atherogenic diet compared to the normal diet include levels of white blood cells (↑), neutrophils (↑), lymphocytes (↑), glucose (↓), albumin (↓), globulin (↑), ratio of albumin to globulin (↓), total cholesterol (↑), LDL (↑) and HDL (↑). OPP did not cause significant changes in the blood parameters measured, except for normalizing glucose levels in mice fed the atherogenic diet.

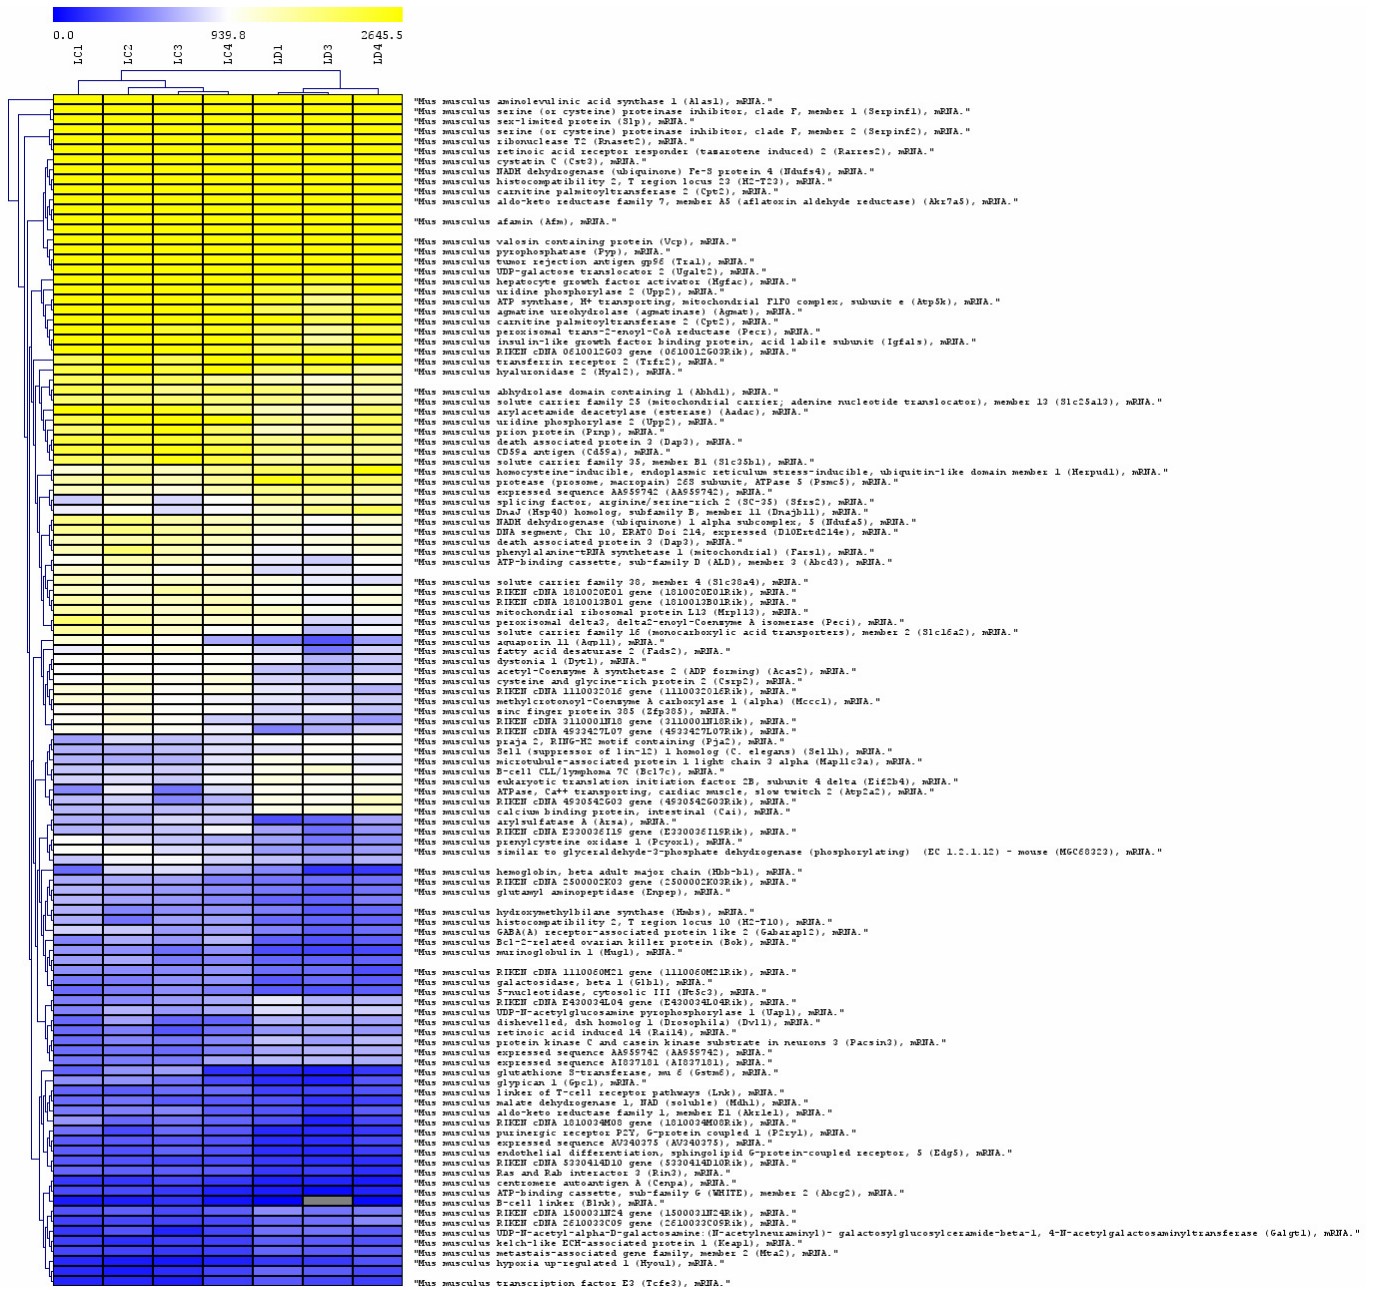

**Online Resource 4** An example of the two-way hierarchical clustering analysis carried out on microarray data. Using microarray data obtained from livers of mice in the AD + OPP group versus the AD + DW group as an example, this figure shows the two-way hierarchical clustering analysis carried out on significantly changed genes. Single colour gene expression values are represented using a blue-white-yellow (0 to positive) colour scheme. Grey boxes indicate negative values. Note that the replicates of each group (LC1, LC2, LC3, LC4 in the AD + DW group and LD1, LD3, LD4 in the AD + OPP group) were clustered together within each group but separated from the other group, indicating that the gene expression values selected as significantly changed differentiated the two groups

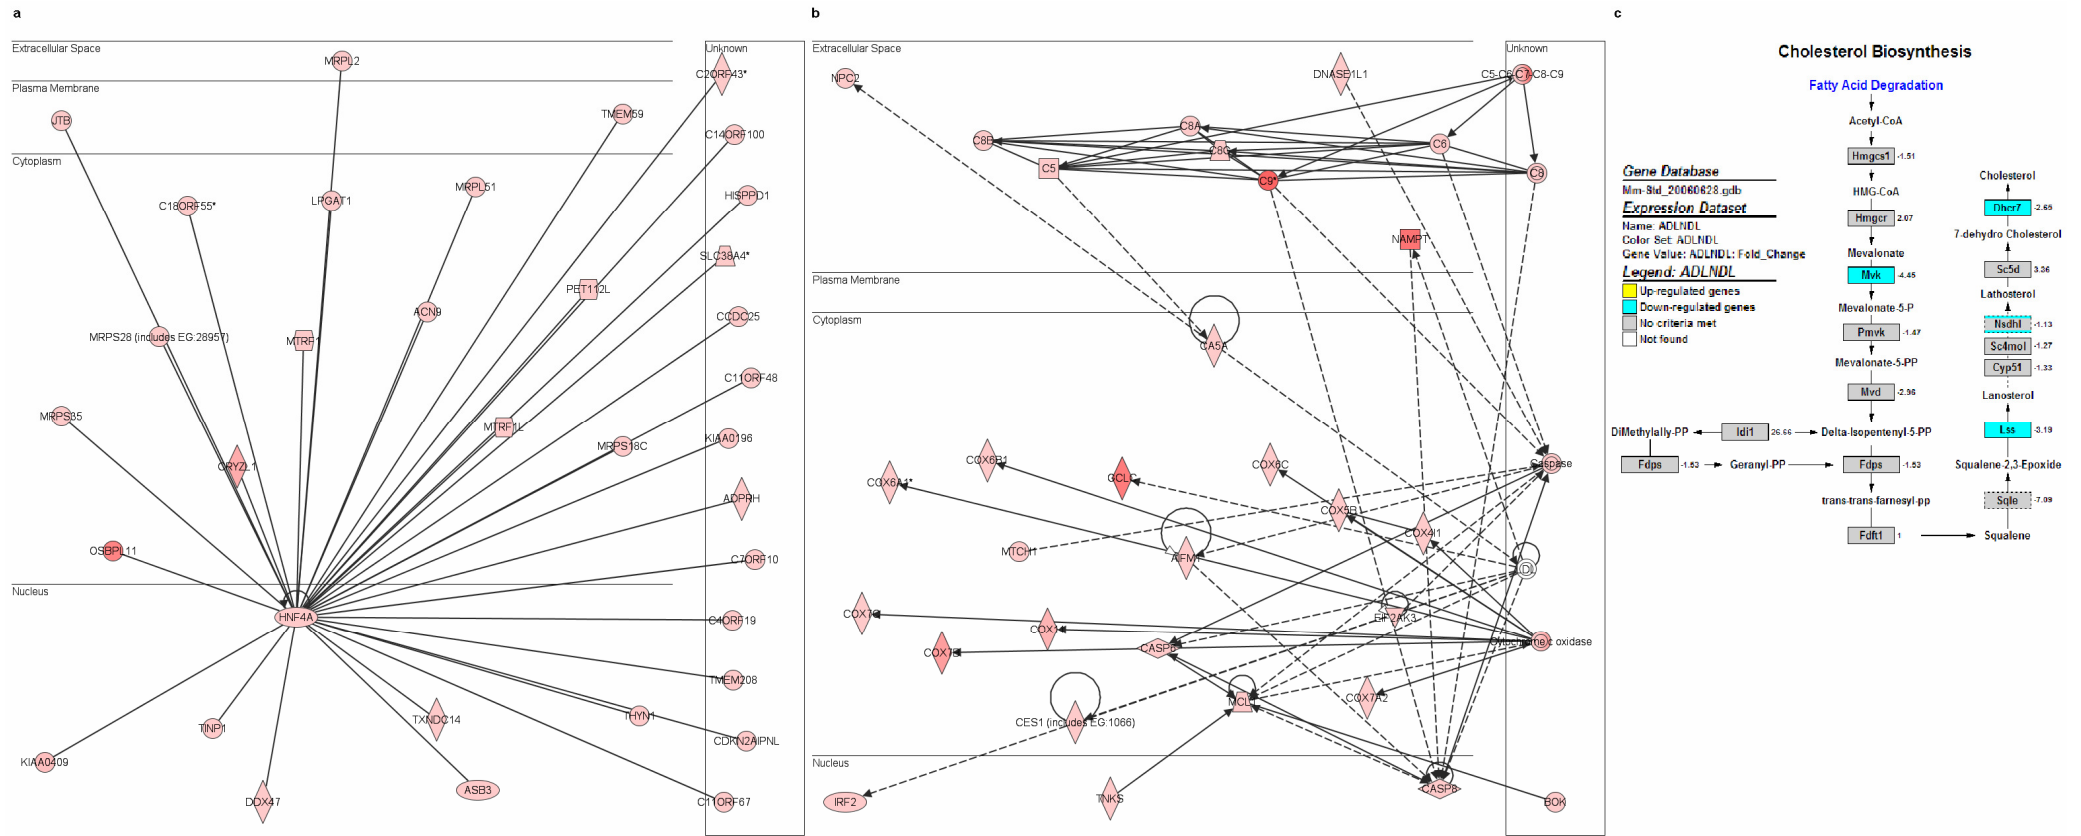

**Online Resource 5** Genes regulated by the atherogenic diet in the liver. **a** Genes up-regulated are linked to *Hnf4a*, which is a nuclear factor involved in hepatocyte differentiation. **b** Genes up-regulated include cytochrome c oxidases, caspases and complement genes, which are involved in cell death via apoptosis. **c** Genes down-regulated by the atherogenic diet in the liver cholesterol biosynthesis pathway

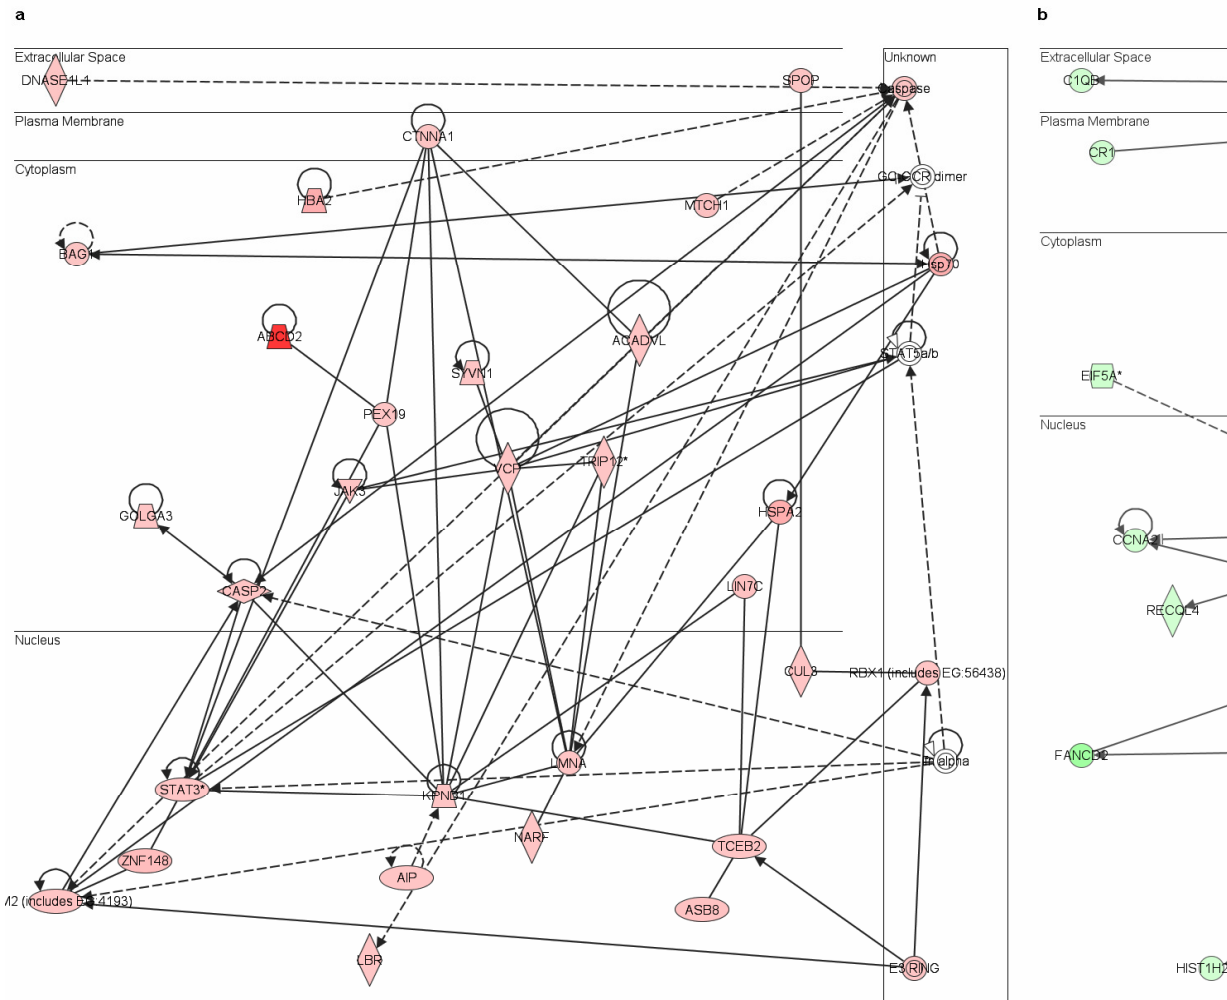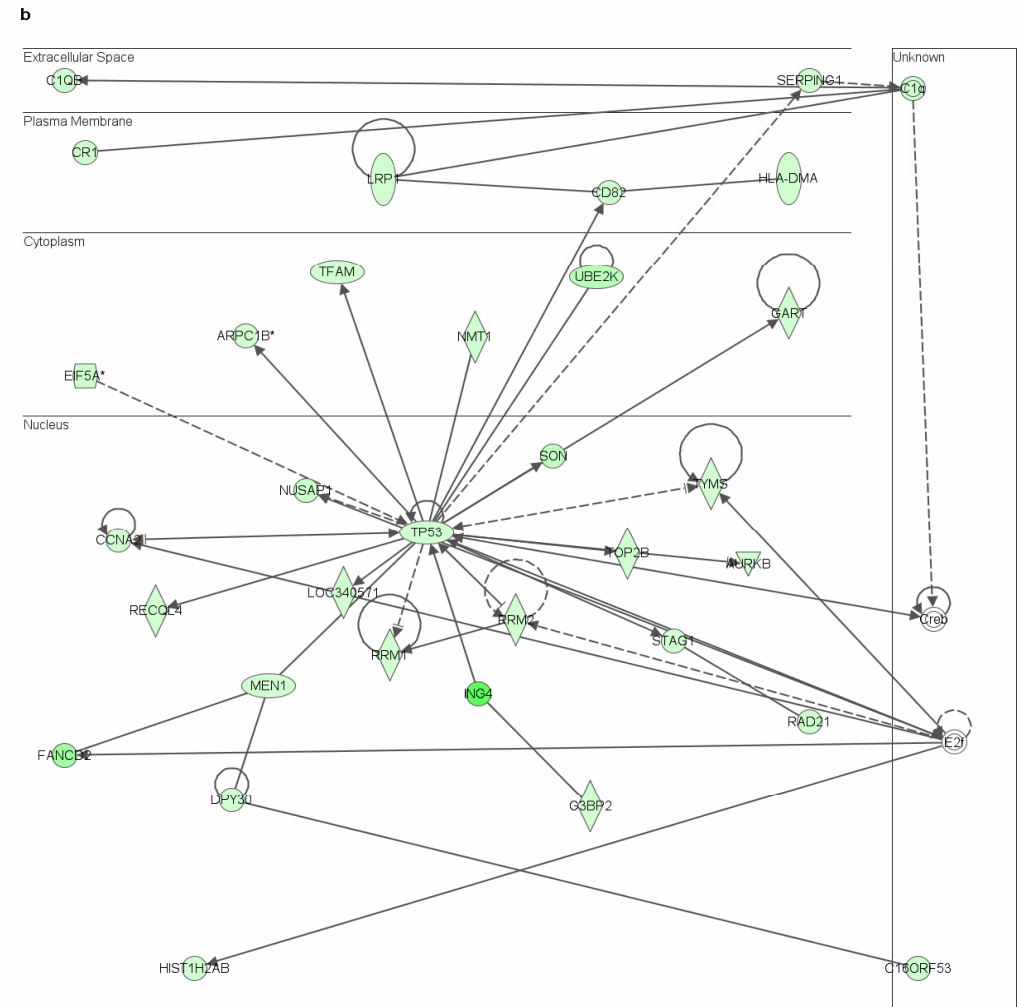

**Online Resource 6** Genes regulated by the atherogenic diet in the spleen. **a** Genes up-regulated in the *Stat3* network. The *Stat3* gene plays an important role as a transcription activator in immune system development. However, it has also been implicated to have an inflammatory role as an acute phase response factor. **b** Genes down-regulated in the *Tp53* network. *Tp53* is a tumor suppressor which promotes apoptosis. Down-regulation of this gene suggests increased proliferation of immune cells caused by the atherogenic diet

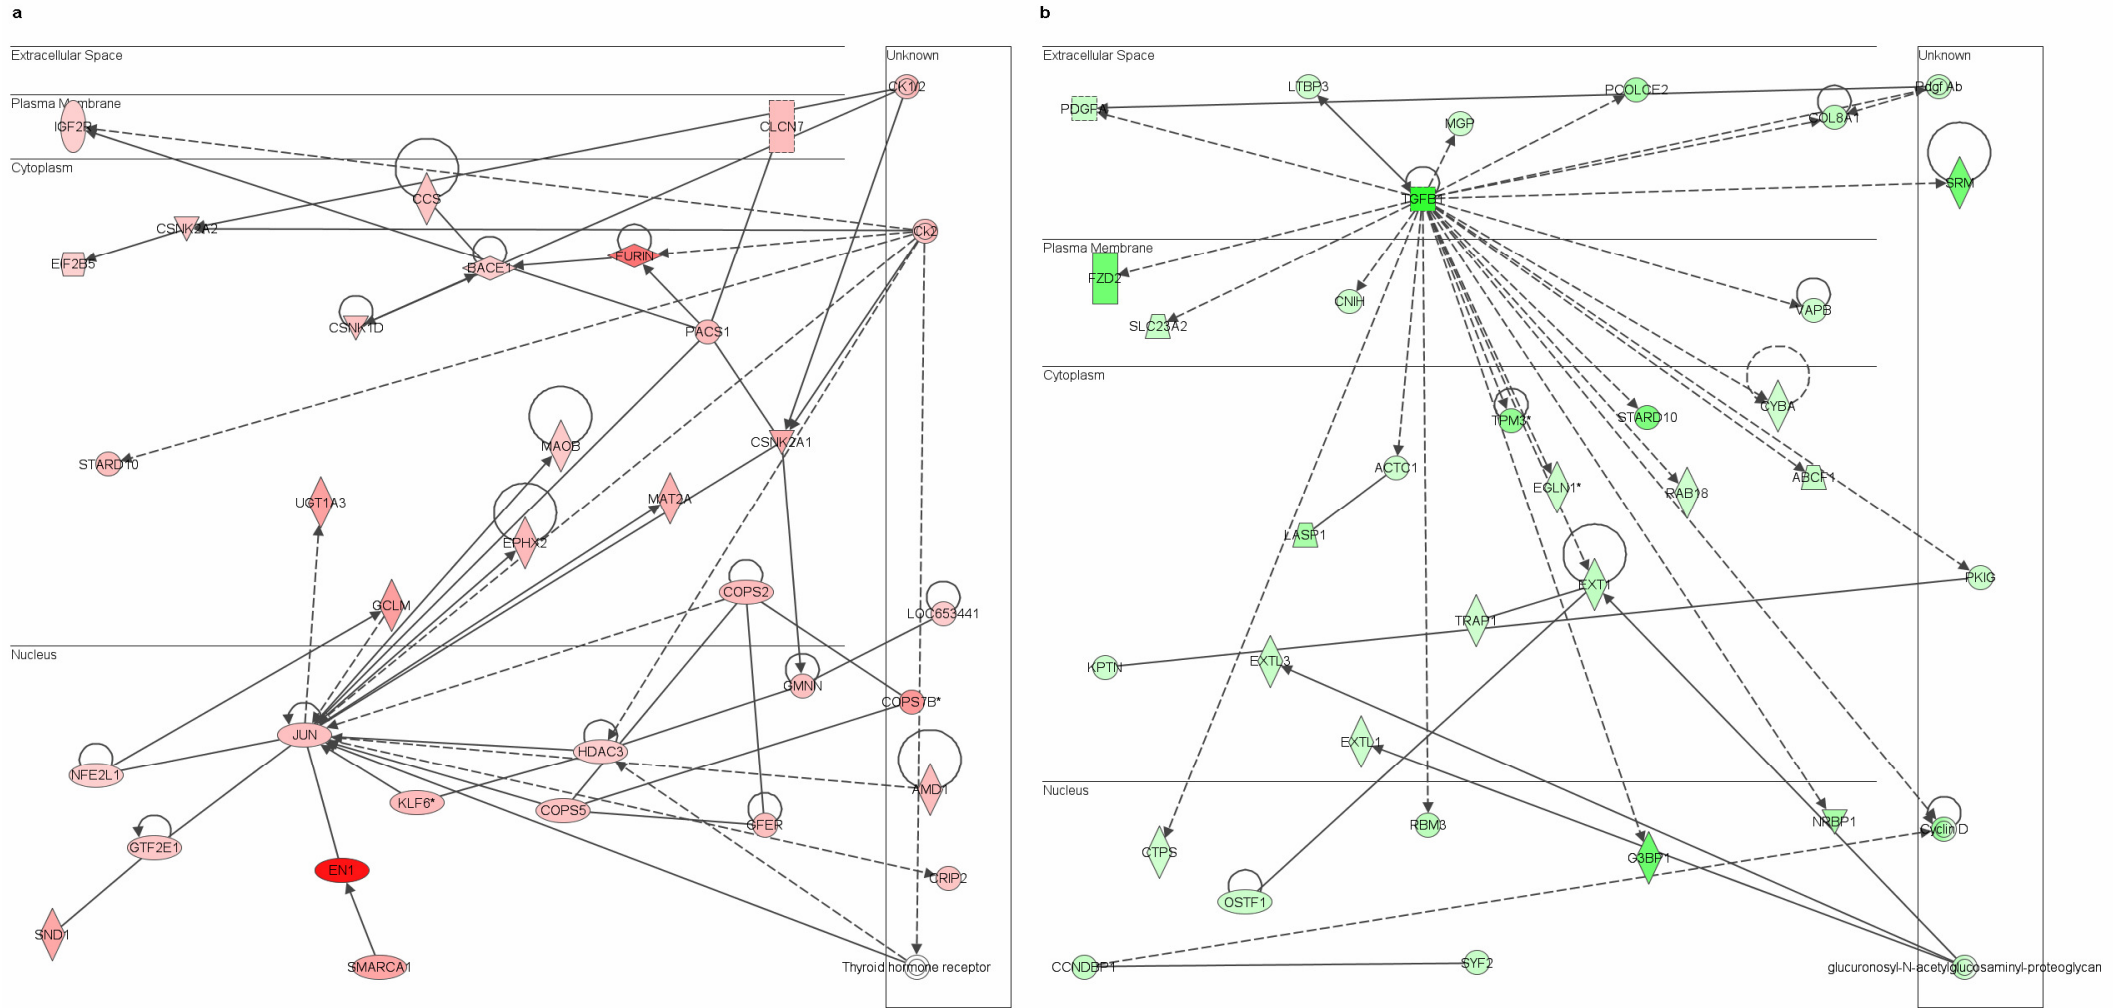

**Online Resource 7** Genes regulated by the atherogenic diet in the heart. **a** Genes up-regulated in the *Jun* network. Activation of the *Jun* gene has been implicated in oxidative stress, inflammation, arterial injury and heart disease. **b** Genes down-regulated in the *Tgfb1* network. The *Tgfb* gene has an anti-inflammatory role and has been suggested to be protective in atherosclerosis



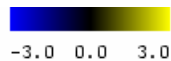

AD+DW:ND+DW  
AD+OPP:AD+DW

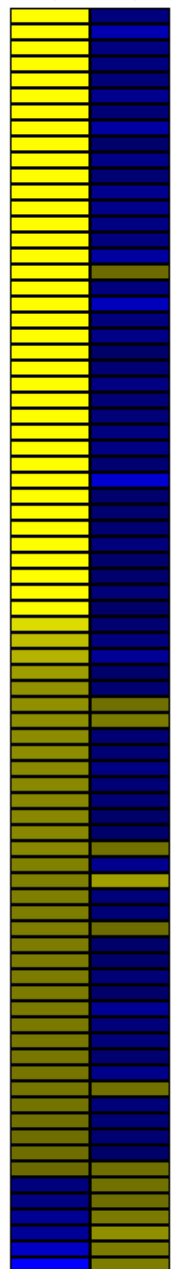

"Mus musculus RIKEN cDNA 3110001N18 gene (3110001N18Rik), mRNA."  
 "Mus musculus aquaporin 11 (Aqp11), mRNA."  
 "Mus musculus prenylcysteine oxidase 1 (Pcyox1), mRNA."  
 "Mus musculus glutamyl aminopeptidase (Erpep), mRNA."  
 "Mus musculus hydroxymethylbilane synthase (Hmbzs), mRNA."  
 "Mus musculus ATP synthase, H+ transporting, mitochondrial F1F0 complex, subunit e (Atp5k), mRNA."  
 "Mus musculus NADH dehydrogenase (ubiquinone) 1 alpha subcomplex, 5 (Ndufa5), mRNA."  
 "Mus musculus RIKEN cDNA 1810034M08 gene (1810034M08Rik), mRNA."  
 "Mus musculus mitochondrial ribosomal protein L13 (Mrpl13), mRNA."  
 "Mus musculus arylacetamide deacetylase (esterase) (Aadac), mRNA."  
 "Mus musculus methylcrotonoyl-Coenzyme A carboxylase 1 (alpha) (Mccc1), mRNA."  
 "Mus musculus GABA(A) receptor-associated protein like 2 (Gabarapl2), mRNA."  
 "Mus musculus peroxisomal delta3, delta2-enoyl-Coenzyme A isomerase (Peci), mRNA."  
 "Mus musculus solute carrier family 16 (monocarboxylic acid transporters), member 2 (Slc16a2), mRNA."  
 "Mus musculus malate dehydrogenase 1, NAD (soluble) (Mdh1), mRNA."  
 "Mus musculus murinoglobulin 1 (Mug1), mRNA."  
 "Mus musculus expressed sequence AA959742 (AA959742), mRNA."  
 "Mus musculus RIKEN cDNA 1110032O16 gene (1110032O16Rik), mRNA."  
 "Mus musculus hemoglobin, beta adult major chain (Hbb-b1), mRNA."  
 "Mus musculus similar to glyceraldehyde-3-phosphate dehydrogenase (phosphorylating) (EC 1.2.1.12) - mouse (MGC68323), mRNA."  
 "Mus musculus solute carrier family 25 (mitochondrial carrier; adenine nucleotide translocator), member 13 (Slc25a13), mRNA."  
 "Mus musculus peroxisomal trans-2-enoyl-CoA reductase (Pecr), mRNA."  
 "Mus musculus aldo-keto reductase family 1, member E1 (Akr1e1), mRNA."  
 "Mus musculus solute carrier family 38, member 4 (Slc38a4), mRNA."  
 "Mus musculus RIKEN cDNA 2500002K03 gene (2500002K03Rik), mRNA."  
 "Mus musculus histocompatibility 2, T region locus 10 (H2-T10), mRNA."  
 "Mus musculus RIKEN cDNA 5330414D10 gene (5330414D10Rik), mRNA."  
 "Mus musculus afamin (Afm), mRNA."  
 "Mus musculus ATP-binding cassette, sub-family G (WHITE), member 2 (Abcg2), mRNA."  
 "Mus musculus dystonia 1 (Dyt1), mRNA."  
 "Mus musculus RIKEN cDNA 1810020E01 gene (1810020E01Rik), mRNA."  
 "Mus musculus retinoic acid receptor responder (tasarotene induced) 2 (Rarres2), mRNA."  
 "Mus musculus RIKEN cDNA 1110060H21 gene (1110060H21Rik), mRNA."  
 "Mus musculus zinc finger protein 385 (Zfp385), mRNA."  
 "Mus musculus carnitine palmitoyltransferase 2 (Cpt2), mRNA."  
 "Mus musculus uridine phosphorylase 2 (Upp2), mRNA."  
 "Mus musculus NADH dehydrogenase (ubiquinone) Fe-S protein 4 (Ndufs4), mRNA."  
 "Mus musculus histocompatibility 2, T region locus 23 (H2-T23), mRNA."  
 "Mus musculus uridine phosphorylase 2 (Upp2), mRNA."  
 "Mus musculus Ras and Rab interactor 3 (Rin3), mRNA."  
 "Mus musculus carnitine palmitoyltransferase 2 (Cpt2), mRNA."  
 "Mus musculus RIKEN cDNA 0610012G03 gene (0610012G03Rik), mRNA."  
 "Mus musculus microtubule-associated protein 1 light chain 3 alpha (Hap1lc3a), mRNA."  
 "Mus musculus metastasis-associated gene family, member 2 (Mta2), mRNA."  
 "Mus musculus solute carrier family 35, member B1 (Slc35b1), mRNA."  
 "Mus musculus cysteine and glycine-rich protein 2 (Csrp2), mRNA."  
 "Mus musculus DNA segment, Chr 10, ERATO Doi 214, expressed (D10Ert4214e), mRNA."  
 "Mus musculus ribonuclease T2 (Rnaset2), mRNA."  
 "Mus musculus aminolevulinic acid synthase 1 (Alas1), mRNA."  
 "Mus musculus cystatin C (Cst3), mRNA."  
 "Mus musculus abhydrolase domain containing 1 (Abhd1), mRNA."  
 "Mus musculus tumor rejection antigen gp96 (Tra1), mRNA."  
 "Mus musculus expressed sequence AV340375 (AV340375), mRNA."  
 "Mus musculus DnaJ (Hsp40) homolog, subfamily B, member 11 (Dnajb11), mRNA."  
 "Mus musculus phenylalanine-tRNA synthetase 1 (mitochondrial) (Fars1), mRNA."  
 "Mus musculus Sell1 (suppressor of lin-12) 1 homolog (C. elegans) (Sell1h), mRNA."  
 "Mus musculus death associated protein 3 (Dap3), mRNA."  
 "Mus musculus galactosidase, beta 1 (Glb1), mRNA."  
 "Mus musculus Bcl-2-related ovarian killer protein (Bok), mRNA."  
 "Mus musculus ATP-binding cassette, sub-family D (ALD), member 3 (Abcd3), mRNA."  
 "Mus musculus prion protein (Prnp), mRNA."  
 "Mus musculus serine (or cysteine) proteinase inhibitor, clade F, member 1 (Serpinf1), mRNA."  
 "Mus musculus RIKEN cDNA 4933427L07 gene (4933427L07Rik), mRNA."  
 "Mus musculus B-cell CLL/lymphoma 7C (Bcl7c), mRNA."  
 "Mus musculus linker of T-cell receptor pathways (Lrk), mRNA."  
 "Mus musculus 5-nucleotidase, cytosolic III (Nt5c3), mRNA."  
 "Mus musculus aldo-keto reductase family 7, member A5 (aflatoxin aldehyde reductase) (Akr7a5), mRNA."  
 "Mus musculus death associated protein 3 (Dap3), mRNA."  
 "Mus musculus praja 2, RING-H2 motif containing (Pja2), mRNA."  
 "Mus musculus expressed sequence AI837181 (AI837181), mRNA."  
 "Mus musculus RIKEN cDNA E430034L04 gene (E430034L04Rik), mRNA."  
 "Mus musculus dishevelled, dsh homolog 1 (Drosophila) (Dvl1), mRNA."  
 "Mus musculus RIKEN cDNA 2610033C09 gene (2610033C09Rik), mRNA."  
 "Mus musculus kelch-like ECH-associated protein 1 (Keap1), mRNA."  
 "Mus musculus splicing factor, arginine/serine-rich 2 (SC-35) (Sfrs2), mRNA."

**Online Resource 8** Comparison of genes significantly changed by the atherogenic diet and OPP in terms of the direction of fold changes (using data from livers as an example). Values of fold changes are represented using a blue-black-yellow (negative to positive) colour scheme. The |Differential Score for all genes is more than 20, equivalent to a P Value of less than 0.01

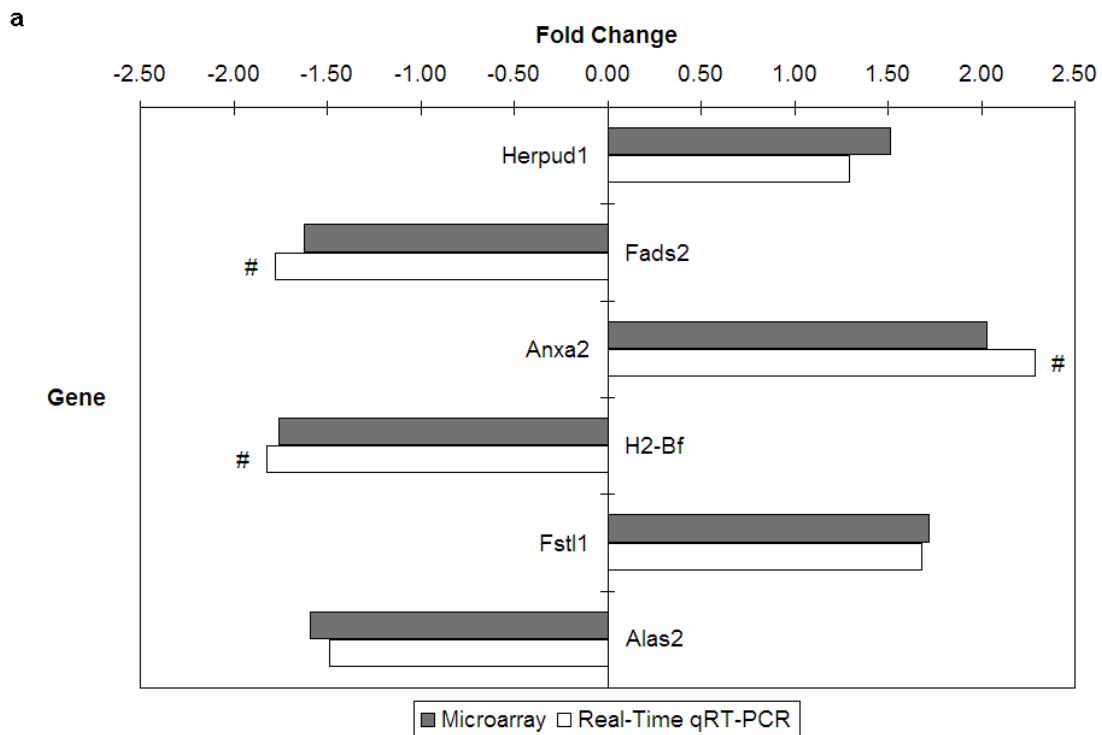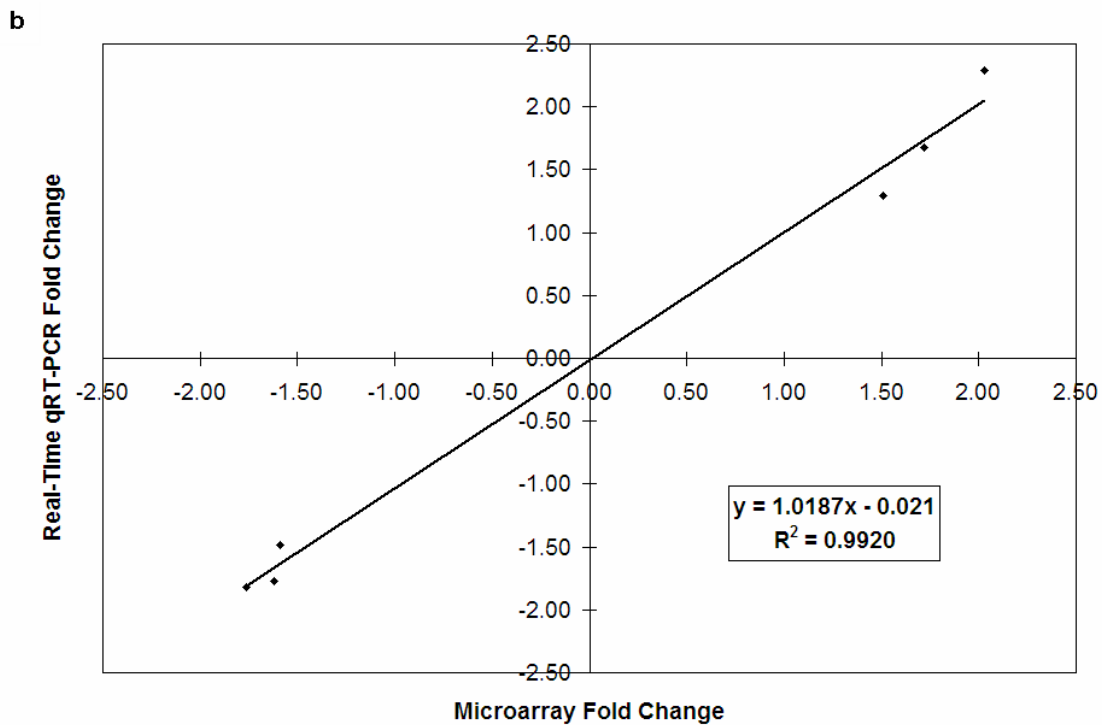

**Online Resource 9** Gene expression fold changes of six target genes as determined by microarray and real-time qRT-PCR experiments and their correlation. **a** The direction and magnitude of fold changes obtained from the real-time qRT-PCR technique were comparable to those obtained from the microarray technique. #  $p < 0.05$  for gene expression fold changes quantified by real-time PCR experiments as determined by two-tailed unpaired Student's *t*-test. **b** Validation of the microarray data via real-time qRT-PCR shows that correlation of fold changes obtained by these two gene expression profiling techniques was high with an  $R^2 = 0.9920$
