# Supplementary material for: Oil palm phenolics attenuate changes caused by an atherogenic diet in mice
Source: Springer Nature journal article supplement (doi:10.1007/s00394-012-0346-0), 2012-04-10
Supplement: MOESM3 [file 8391004]

**Article Title:** Oil palm phenolics attenuate changes caused by an atherogenic diet in mice.

**Journal Name:** European Journal of Nutrition.

**Author Names:** Soon-Sen Leow, Shamala Devi Sekaran, Kalyana Sundram, YewAi Tan, Ravigadevi Sambanthamurthi.

**Corresponding Author:** Ravigadevi Sambanthamurthi; Malaysian Palm Oil Board, No. 6, Persiaran Institusi, Bandar Baru Bangi, 43000 Kajang, Selangor, Malaysia; E-mail: [raviga@mpob.gov.my](mailto:raviga@mpob.gov.my).

### **Supplementary Material 3**

This file contains six tables which show lists of genes, as well as GenMAPPs and gene ontologies significantly changed by OPP in livers, spleens and hearts of mice. The IDifferential Score for all genes is more than 20, equivalent to a P Value of less than 0.01, with the exception of genes in the heart, which were selected using a IDifferential Score of more than 13, equivalent to a P Value of less than 0.05. All GenMAPPs and gene ontologies had Permuted P Values of less than 0.01, Numbers of Genes Changed of more than or equal to 2 and Z Scores of more than 2, except for those in the heart, which were selected using Permuted P Values of less than 0.05.

**Table A7** Genes significantly changed by OPP in livers.

**Table A8** GenMAPPs and gene ontologies significantly changed by OPP in livers.

**Table A9** Genes significantly changed by OPP in spleens.

**Table A10** GenMAPPs and gene ontologies significantly changed by OPP in spleens.

**Table A11** Genes significantly changed by OPP in hearts.

**Table A12** GenMAPPs and gene ontologies significantly changed by OPP in hearts.

TABLE A7

## GENES UP-REGULATED BY OPP IN LIVERS

| TargetID             | Diff Score | Fold Change | Symbol        | Accession   | Definition                                                                                                                                                  |
|----------------------|------------|-------------|---------------|-------------|-------------------------------------------------------------------------------------------------------------------------------------------------------------|
| scl29051.11.1 27-S   | 62.1574    | 1.62        | Cai           | NM_009787.1 | Mus musculus calcium binding protein, intestinal (Cai), mRNA.                                                                                               |
| scl0227613.1 83-S    | 45.7174    | 1.73        | 4930542G03Rik | NM_146116.1 | Mus musculus RIKEN cDNA 4930542G03 gene (4930542G03Rik), mRNA.                                                                                              |
| scl020567.3 14-S     | 38.7127    | 1.42        | Sip           | NM_011413   | Mus musculus sex-limited protein (Sip), mRNA.                                                                                                               |
| scl40797.10.1 7-S    | 34.6073    | 1.35        | Psmc5         | NM_008950.1 | Mus musculus protease (prosome, macropain) 26S subunit, ATPase 5 (Psmc5), mRNA.                                                                             |
| scl49146.12.1 4-S    | 34.3051    | 1.7         | 2610033C09Rik | NM_026407.2 | Mus musculus RIKEN cDNA 2610033C09 gene (2610033C09Rik), mRNA.                                                                                              |
| scl41025.7 232-S     | 33.1084    | 1.47        | AA959742      | NM_133807.1 | Mus musculus expressed sequence AA959742 (AA959742), mRNA.                                                                                                  |
| scl020382.2 66-S     | 32.0853    | 1.49        | Sfrs2         | NM_011358.1 | Mus musculus splicing factor, arginine/serine-rich 2 (SC-35) (Sfrs2), mRNA.                                                                                 |
| scl49316.10.1 29-S   | 29.0872    | 1.89        | Dnajb11       | XM_148071.1 | Mus musculus Dnaj (Hsp40) homolog, subfamily B, member 11 (Dnajb11), mRNA.                                                                                  |
| scl0080708.1 141-S   | 28.7693    | 1.42        | Pacsin3       | NM_028733.1 | Mus musculus protein kinase C and casein kinase substrate in neurons 3 (Pacsin3), mRNA.                                                                     |
| scl38328.12.1 41-S   | 28.2092    | 1.75        | Galgt1        | NM_008080.3 | Mus musculus UDP-N-acetyl-alpha-D-galactosamine:(N-acetylneuraminyl)-galactosylglucosylceramide-beta-1, 4-N-acetylgalactosaminyltransferase (Galgt1), mRNA. |
| scl37681.14 50-S     | 27.7446    | 1.97        | Sic41a2       | NM_177388.2 |                                                                                                                                                             |
| scl47392.22 290-S    | 26.8987    | 1.43        | Rai14         | NM_030690.2 | Mus musculus retinoic acid induced 14 (Rai14), mRNA.                                                                                                        |
| scl33485.7 10-S      | 26.7333    | 1.51        | Herpud1       | NM_022331.1 | Mus musculus homocysteine-inducible, endoplasmic reticulum stress-inducible, ubiquitin-like domain member 1 (Herpud1), mRNA.                                |
| scl38868.13.1 10-S   | 26.0727    | 1.4         | Pyp           | NM_026438.2 | Mus musculus pyrophosphatase (Pyp), mRNA.                                                                                                                   |
| scl37659.18.259 11-S | 25.9447    | 1.35        | Tra1          | NM_011631.1 | Mus musculus tumor rejection antigen gp96 (Tra1), mRNA.                                                                                                     |
| scl41012.9.1 84-S    | 25.56      | 1.28        | Ugalt2        | NM_016752.1 | Mus musculus UDP-galactose translocator 2 (Ugalt2), mRNA.                                                                                                   |
| scl00224938.2 37-S   | 25.3174    | 1.33        | Pja2          | NM_144859.1 | Mus musculus praja 2, RING-H2 motif containing (Pja2), mRNA.                                                                                                |
| scl47810.5 374-S     | 25.0248    | 1.45        | 1500031N24Rik | XM_128010.4 | Mus musculus RIKEN cDNA 1500031N24 gene (1500031N24Rik), mRNA.                                                                                              |
| scl0003984.1 492-S   | 24.6608    | 1.55        | Atp2a2        | NM_009722.1 | Mus musculus ATPase, Ca++ transporting, cardiac muscle, slow twitch 2 (Atp2a2), mRNA.                                                                       |
| scl26742.12.1 68-S   | 24.6243    | 1.31        | Eif2b4        | NM_010122.1 | Mus musculus eukaryotic translation initiation factor 2B, subunit 4 delta (Eif2b4), mRNA.                                                                   |
| scl000086.1 135-S    | 24.2991    | 1.28        | AA959742      | NM_133807.1 | Mus musculus expressed sequence AA959742 (AA959742), mRNA.                                                                                                  |
| scl27100.19.1 2-S    | 23.9718    | 1.31        | Trfr2         | NM_015799.2 | Mus musculus transferrin receptor 2 (Trfr2), mRNA.                                                                                                          |
| scl20056.4.1 63-S    | 23.8768    | 1.34        | Map1lc3a      | NM_025735.1 | Mus musculus microtubule-associated protein 1 light chain 3 alpha (Map1lc3a), mRNA.                                                                         |
| scl37037.27 257-S    | 22.4045    | 2.04        | Hyou1         | NM_021395.2 | Mus musculus hypoxia up-regulated 1 (Hyou1), mRNA.                                                                                                          |
| scl24607.15 131-S    | 22.2705    | 1.45        | Dvl1          | NM_010091.2 | Mus musculus dishevelled, dsh homolog 1 (Drosophila) (Dvl1), mRNA.                                                                                          |
| scl018816.1 117-S    | 21.5879    | 1.34        | Serpinf2      | NM_008878.1 | Mus musculus serine (or cysteine) proteinase inhibitor, clade F, member 2 (Serpinf2), mRNA.                                                                 |
| scl15961.15.1 3-S    | 21.4268    | 1.31        | Uap1          | NM_133806.2 | Mus musculus UDP-N-acetylglucosamine pyrophosphorylase 1 (Uap1), mRNA.                                                                                      |
| scl020338.1 17-S     | 20.9782    | 1.29        | Sel1h         | NM_011344.1 | Mus musculus Sel1 (suppressor of lin-12) 1 homolog (C. elegans) (Sel1h), mRNA.                                                                              |
| scl53392.18 161-S    | 20.8154    | 1.47        | Mta2          | NM_011842.2 | Mus musculus metastasis-associated gene family, member 2 (Mta2), mRNA.                                                                                      |
| scl0012055.2 161-S   | 20.6824    | 1.35        | Bcl7c         | NM_009746   | Mus musculus B-cell CLL/lymphoma 7C (Bcl7c), mRNA.                                                                                                          |
| scl0269523.2 3-S     | 20.5116    | 1.23        | Vcp           | NM_009503.2 | Mus musculus valosin containing protein (Vcp), mRNA.                                                                                                        |
| scl0023881.1 86-S    | 20.2451    | 1.31        | E430034L04Rik | NM_011816.2 | Mus musculus RIKEN cDNA E430034L04 gene (E430034L04Rik), mRNA.                                                                                              |
| scl55073.12 278-S    | 20.1097    | 1.74        | Tcfe3         | NM_172472.1 | Mus musculus transcription factor E3 (Tcfe3), mRNA.                                                                                                         |
| scl52839.2 29-S      | 20.087     | 1.35        | Al837181      | NM_134149.1 | Mus musculus expressed sequence Al837181 (Al837181), mRNA.                                                                                                  |
| scl0003591.1 99-S    | 20.0477    | 1.48        | Keap1         | NM_016679.2 | Mus musculus kelch-like ECH-associated protein 1 (Keap1), mRNA.                                                                                             |

## GENES DOWN-REGULATED BY OPP IN LIVERS

| TargetID             | Diff Score | Fold Change | Symbol        | Accession   | Definition                                                                                                                 |
|----------------------|------------|-------------|---------------|-------------|----------------------------------------------------------------------------------------------------------------------------|
| scl37827.3 399-S     | -68.574    | -1.54       | D10Ert214e    | NM_134007.2 | Mus musculus DNA segment, Chr 10, ERATO Doi 214, expressed (D10Ert214e), mRNA.                                             |
| scl051800.6 308-S    | -60.7516   | -1.74       | Bok           | NM_016778   | Mus musculus Bcl-2-related ovarian killer protein (Bok), mRNA.                                                             |
| scl017836.18 18-S    | -59.0568   | -1.87       | Mug1          | NM_008645.2 | Mus musculus murinoglobulin 1 (Mug1), mRNA.                                                                                |
| scl0277333.1 280-S   | -53.49     | -1.59       | MGC68323      | NM_199472.1 | Mus musculus similar to glyceraldehyde-3-phosphate dehydrogenase (phosphorylating) (EC 1.2.1.12) - mouse (MGC68323), mRNA. |
| scl30665.8.1 14-S    | -52.5647   | -1.49       | 1110032O16Rik | XM_133813.4 | Mus musculus RIKEN cDNA 1110032O16 gene (1110032O16Rik), mRNA.                                                             |
| scl20534.5 360-S     | -47.3892   | -1.4        | Cd59a         | NM_007652.2 | Mus musculus CD59a antigen (Cd59a), mRNA.                                                                                  |
| scl42840.6.80 202-S  | -41.3808   | -1.41       | Serpina4-ps1  | XM_127122.2 |                                                                                                                            |
| scl093739.4 24-S     | -41.1992   | -1.65       | Gabarapl2     | NM_026693.2 | Mus musculus GABA(A) receptor-associated protein like 2 (Gabarapl2), mRNA.                                                 |
| scl060525.18 152-S   | -38.7756   | -1.41       | Acas2         | NM_019811.2 | Mus musculus acetyl-Coenzyme A synthetase 2 (ADP forming) (Acas2), mRNA.                                                   |
| scl27606.14.1 65-S   | -38.692    | -1.33       | Afm           | NM_145146.1 | Mus musculus afamin (Afm), mRNA.                                                                                           |
| scl068195.1 129-S    | -38.5412   | -1.38       | Rnaset2       | NM_026611.1 | Mus musculus ribonuclease T2 (Rnaset2), mRNA.                                                                              |
| scl42858.13 56-S     | -38.4163   | -1.75       | Rin3          | NM_177620.2 | Mus musculus Ras and Rab interactor 3 (Rin3), mRNA.                                                                        |
| scl23142.2.172 159-S | -36.0157   | -2.08       | P2ry1         | NM_008772.2 | Mus musculus purinergic receptor P2Y, G-protein coupled 1 (P2ry1), mRNA.                                                   |
| scl36156.3 7-S       | -35.13     | -1.79       | Edg5          | NM_010333   | Mus musculus endothelial differentiation, sphingolipid G-protein-coupled receptor, 5 (Edg5), mRNA.                         |
| scl020317.1 68-S     | -34.928    | -1.3        | Serpinf1      | NM_011340.2 | Mus musculus serine (or cysteine) proteinase inhibitor, clade F, member 1 (Serpinf1), mRNA.                                |
| scl0015040.1 90-S    | -33.9706   | -1.33       | H2-T23        | NM_010398.1 | Mus musculus histocompatibility 2, T region locus 23 (H2-T23), mRNA.                                                       |

|                       |          |       |               |             |                                                                                                                             |
|-----------------------|----------|-------|---------------|-------------|-----------------------------------------------------------------------------------------------------------------------------|
| scl0076654.1 225-S    | -33.5381 | -1.46 | Upp2          | NM_029692.1 | Mus musculus uridine phosphorylase 2 (Upp2), mRNA.                                                                          |
| scl51764.24.1 222-S   | -33.2678 | -1.6  | 4933427L07Rik | NM_027727.1 | Mus musculus RIKEN cDNA 4933427L07 gene (4933427L07Rik), mRNA.                                                              |
| scl36510.4 431-S      | -33.1002 | -1.37 | 1810013B01Rik | NM_029631   | Mus musculus RIKEN cDNA 1810013B01 gene (1810013B01Rik), mRNA.                                                              |
| scl0013809.2 54-S     | -32.0077 | -1.46 | Enpep         | NM_007934.1 | Mus musculus glutamyl aminopeptidase (Enpep), mRNA.                                                                         |
| scl38453.7.1 27-S     | -31.8387 | -1.35 | Csrp2         | NM_007792.2 | Mus musculus cysteine and glycine-rich protein 2 (Csrp2), mRNA.                                                             |
| scl072043.2 38-S      | -29.581  | -1.48 | Sulf2         | XM_358343.1 |                                                                                                                             |
| scl0231871.16 33-S    | -28.0465 | -1.46 | E330036119Rik | NM_144915.2 | Mus musculus RIKEN cDNA E330036119 gene (E330036119Rik), mRNA.                                                              |
| scl0069354.1 68-S     | -28.015  | -1.37 | Slc38a4       | NM_027052.2 | Mus musculus solute carrier family 38, member 4 (Slc38a4), mRNA.                                                            |
| scl31028.4.1 18-S     | -27.8178 | -2.09 | Aqp11         | NM_175105.2 | Mus musculus aquaporin 11 (Aqp11), mRNA.                                                                                    |
| scl076654.7 194-S     | -27.4625 | -1.4  | Upp2          | NM_029692.1 | Mus musculus uridine phosphorylase 2 (Upp2), mRNA.                                                                          |
| scl15766.4.1 27-S     | -27.0369 | -1.44 | 1110060M21Rik | NM_025424.1 | Mus musculus RIKEN cDNA 1110060M21 gene (1110060M21Rik), mRNA.                                                              |
| scl068028.3 20-S      | -26.6605 | -1.46 | 3110001N18Rik | NM_026517.1 | Mus musculus RIKEN cDNA 3110001N18 gene (3110001N18Rik), mRNA.                                                              |
| scl00353208.1 64-S    | -26.6454 | -1.46 | 2810021G02Rik |             |                                                                                                                             |
| scl013885.9 29-S      | -26.3108 | -1.27 | Esd           | NM_016903   |                                                                                                                             |
| scl50689.6 424-S      | -26.0925 | -1.36 | Slc35b1       | XM_128634.4 | Mus musculus solute carrier family 35, member B1 (Slc35b1), mRNA.                                                           |
| scl24019.5 109-S      | -26.0389 | -1.25 | Cpt2          | NM_009949   | Mus musculus carnitine palmitoyltransferase 2 (Cpt2), mRNA.                                                                 |
| scl48561.1.13 8-S     | -25.5364 | -1.32 | 0610012G03Rik | NM_025320   | Mus musculus RIKEN cDNA 0610012G03 gene (0610012G03Rik), mRNA.                                                              |
| scl0056473.2 148-S    | -25.5211 | -1.62 | Fads2         | NM_019699.1 | Mus musculus fatty acid desaturase 2 (Fads2), mRNA.                                                                         |
| scl24738.7.1 167-S    | -25.3922 | -1.59 | Agmat         | XM_131722.2 | Mus musculus agmatine ureohydrolase (agmatinase) (Agmat), mRNA.                                                             |
| scl0012091.2 274-S    | -25.3493 | -1.41 | Glb1          | NM_009752.1 | Mus musculus galactosidase, beta 1 (Glb1), mRNA.                                                                            |
| scl0001121.1 1-S      | -25.2118 | -1.37 | Ndufa5        | NM_026614.1 | Mus musculus NADH dehydrogenase (ubiquinone) 1 alpha subcomplex, 5 (Ndufa5), mRNA.                                          |
| scl0019299.2 231-S    | -24.9867 | -1.42 | Abcd3         | NM_008991.1 | Mus musculus ATP-binding cassette, sub-family D (ALD), member 3 (Abcd3), mRNA.                                              |
| scl013010.2 9-S       | -24.7589 | -1.24 | Cst3          | NM_009976.2 | Mus musculus cystatin C (Cst3), mRNA.                                                                                       |
| scl27904.14.1 131-S   | -24.6539 | -1.41 | Hgfac         | NM_019447.1 | Mus musculus hepatocyte growth factor activator (Hgfac), mRNA.                                                              |
| scl0066881.2 144-S    | -24.5497 | -1.52 | Pcyox1        | NM_025823.3 | Mus musculus prenylcysteine oxidase 1 (Pcyox1), mRNA.                                                                       |
| scl00232449.2 167-S   | -24.4302 | -1.4  | 2500002K03Rik | NM_172733.1 | Mus musculus RIKEN cDNA 2500002K03 gene (2500002K03Rik), mRNA.                                                              |
| scl012615.5 26-S      | -24.4192 | -1.83 | Cenpa         | NM_007681.1 | Mus musculus centromere autoantigen A (Cenpa), mRNA.                                                                        |
| scl011958.2 29-S      | -24.2201 | -1.67 | Atp5k         | NM_007507   | Mus musculus ATP synthase, H+ transporting, mitochondrial F1F0 complex, subunit e (Atp5k), mRNA.                            |
| scl016005.2 201-S     | -24.1536 | -1.43 | Igfals        | NM_008340.2 | Mus musculus insulin-like growth factor binding protein, acid labile subunit (Igfals), mRNA.                                |
| scl0065111.1 63-S     | -24.0089 | -1.25 | Dap3          | NM_022994.2 | Mus musculus death associated protein 3 (Dap3), mRNA.                                                                       |
| scl0071755.2 316-S    | -23.6636 | -1.39 | 1300018L09Rik | NM_027903.1 |                                                                                                                             |
| scl0245867.4 1-S      | -23.1996 | -1.57 | 5330414D10Rik | NM_153594.2 | Mus musculus RIKEN cDNA 5330414D10 gene (5330414D10Rik), mRNA.                                                              |
| scl47189.8.1 128-S    | -23.0352 | -1.26 | Mrpl13        | NM_026759.2 | Mus musculus mitochondrial ribosomal protein L13 (Mrpl13), mRNA.                                                            |
| scl069786.2 30-S      | -23.0343 | -1.9  | 1810034M08Rik | NM_176842.2 | Mus musculus RIKEN cDNA 1810034M08 gene (1810034M08Rik), mRNA.                                                              |
| scl030931.1 245-S     | -22.9104 | -1.29 | Dyt1          | NM_144884.1 | Mus musculus dystonia 1 (Dyt1), mRNA.                                                                                       |
| scl0015587.1 282-S    | -22.7617 | -1.3  | Hyal2         | NM_010489.2 | Mus musculus hyaluronidase 2 (Hyal2), mRNA.                                                                                 |
| scl27967.7.1 149-S    | -22.7011 | -1.25 | Abhd1         | NM_021304.2 | Mus musculus abhydrolase domain containing 1 (Abhd1), mRNA.                                                                 |
| scl0017993.1 168-S    | -22.4263 | -1.23 | Ndufs4        | NM_010887.1 | Mus musculus NADH dehydrogenase (ubiquinone) Fe-S protein 4 (Ndufs4), mRNA.                                                 |
| scl015024.2 236-S     | -22.3217 | -1.5  | H2-T10        | NM_010395.2 | Mus musculus histocompatibility 2, T region locus 10 (H2-T10), mRNA.                                                        |
| scl071435.1 313-S     | -22.1672 | -1.29 | Arhgap21      | XM_130033.5 |                                                                                                                             |
| scl28963.13.1 27-S    | -22.1273 | -1.38 | Ni5c3         | NM_026004.1 | Mus musculus 5-nucleotidase, cytosolic III (Ni5c3), mRNA.                                                                   |
| scl46659.10 50-S      | -22.0509 | -1.27 | Zfp385        | NM_013866.1 | Mus musculus zinc finger protein 385 (Zfp385), mRNA.                                                                        |
| scl056043.1 7-S       | -22.0415 | -1.52 | Akr1e1        | NM_018859.1 | Mus musculus Aldo-keto reductase family 1, member E1 (Akr1e1), mRNA.                                                        |
| scl35702.23.1 49-S    | -21.9961 | -1.66 | AV340375      | NM_172519.1 | Mus musculus expressed sequence AV340375 (AV340375), mRNA.                                                                  |
| scl017449.1 1-S       | -21.9579 | -1.49 | Mdh1          | NM_008618.2 | Mus musculus malate dehydrogenase 1, NAD (soluble) (Mdh1), mRNA.                                                            |
| scl23150.4.1 11-S     | -21.9494 | -1.59 | Aadac         | NM_023383.1 | Mus musculus arylacetamide deacetylase (esterase) (Aadac), mRNA.                                                            |
| scl53954.7 10-S       | -21.8459 | -1.54 | Slc16a2       | NM_009197.1 | Mus musculus solute carrier family 16 (monocarboxylic acid transporters), member 2 (Slc16a2), mRNA.                         |
| scl52495.17.1 252-S   | -21.8017 | -9.16 | Blink         | NM_008528.3 | Mus musculus B-cell linker (Blink), mRNA.                                                                                   |
| scl023986.1 240-S     | -21.7845 | -1.6  | Peci          | NM_011868.1 | Mus musculus peroxisomal delta3, delta2-enoyl-Coenzyme A isomerase (Peci), mRNA.                                            |
| scl28480.7 231-S      | -21.7816 | -1.23 | Adipor2       | NM_197985.2 |                                                                                                                             |
| gi_30794511 ref NM_01 | -21.7606 | -1.41 | Hmbs          | NM_013551.1 | Mus musculus hydroxymethylbilane synthase (Hmbs), mRNA.                                                                     |
| scl29306.21.1 2-S     | -21.7278 | -1.24 | Slc25a13      | NM_015829.1 | Mus musculus solute carrier family 25 (mitochondrial carrier; adenine nucleotide translocator), member 13 (Slc25a13), mRNA. |
| scl0016923.1 194-S    | -21.5186 | -1.43 | Lnk           | NM_008507.2 | Mus musculus linker of T-cell receptor pathways (Lnk), mRNA.                                                                |
| scl31053.2.1 38-S     | -21.4446 | -1.3  | 1810020E01Rik | NM_025460.1 | Mus musculus RIKEN cDNA 1810020E01 gene (1810020E01Rik), mRNA.                                                              |
| scl0015129.1 300-S    | -21.4001 | -2.21 | Hbb-b1        | NM_008220.2 | Mus musculus hemoglobin, beta adult major chain (Hbb-b1), mRNA.                                                             |
| scl44903.11.3 96-S    | -21.2726 | -1.42 | Fars1         | NM_024274.1 | Mus musculus phenylalanine-tRNA synthetase 1 (mitochondrial) (Fars1), mRNA.                                                 |

|                     |          |       |         |             |                                                                                                     |
|---------------------|----------|-------|---------|-------------|-----------------------------------------------------------------------------------------------------|
| scl22246.19.1 4-S   | -21.26   | -1.33 | Mccc1   | NM_023644.2 | Mus musculus methylcrotonoyl-Coenzyme A carboxylase 1 (alpha) (Mccc1), mRNA.                        |
| scl21666.4.43 5-S   | -21.1897 | -2.7  | Gstm6   | NM_008184.1 | Mus musculus glutathione S-transferase, mu 6 (Gstm6), mRNA.                                         |
| scl0014733.2 286-S  | -21.12   | -2.19 | Gpc1    | NM_016696.1 | Mus musculus glypican 1 (Gpc1), mRNA.                                                               |
| scl16633.10.1 180-S | -20.9497 | -1.36 | Pecr    | NM_023523.3 | Mus musculus peroxisomal trans-2-enoyl-CoA reductase (Pecr), mRNA.                                  |
| scl29045.3.1 38-S   | -20.8041 | -1.34 | Rarres2 | NM_027852.1 | Mus musculus retinoic acid receptor responder (tazarotene induced) 2 (Rarres2), mRNA.               |
| scl29983.21.1 98-S  | -20.7876 | -2.43 | Abcg2   | NM_011920.1 | Mus musculus ATP-binding cassette, sub-family G (WHITE), member 2 (Abcg2), mRNA.                    |
| scl019122.2 199-S   | -20.6556 | -1.43 | Prnp    | NM_011170.1 | Mus musculus prion protein (Prnp), mRNA.                                                            |
| scl24777.7.1 203-S  | -20.5607 | -1.35 | Akr7a5  | NM_025337.2 | Mus musculus aldo-keto reductase family 7, member A5 (aflatoxin aldehyde reductase) (Akr7a5), mRNA. |
| scl35398.12.2 77-S  | -20.5418 | -1.36 | Alas1   | NM_020559.1 | Mus musculus aminolevulinic acid synthase 1 (Alas1), mRNA.                                          |
| scl0011883.2 180-S  | -20.4325 | -1.66 | Arsa    | NM_009713.1 | Mus musculus arylsulfatase A (Arsa), mRNA.                                                          |
| scl065111.1 137-S   | -20.3498 | -1.24 | Dap3    | NM_022994.2 | Mus musculus death associated protein 3 (Dap3), mRNA.                                               |
| scl000022.1 12-S    | -20.021  | -1.28 | Cpt2    | NM_009949   | Mus musculus carnitine palmitoyltransferase 2 (Cpt2), mRNA.                                         |

| TABLE A8                                                            |                                                         |                |                 |                 |                 |                 |                 |                  |                  |
|---------------------------------------------------------------------|---------------------------------------------------------|----------------|-----------------|-----------------|-----------------|-----------------|-----------------|------------------|------------------|
| GENMAPPS AND GENE ONTOLOGIES SIGNIFICANTLY CHANGED BY OPP IN LIVERS |                                                         |                |                 |                 |                 |                 |                 |                  |                  |
| UP-REGULATED - GENMAPP                                              |                                                         |                |                 |                 |                 |                 |                 |                  |                  |
| No.                                                                 | MAPP Name                                               | Number Changed | Number Measured | Number on MAPP  | Percent Changed | Percent Present | Z Score         | Permuted P Value |                  |
| 1                                                                   | Mm_IL-9_NetPath_20                                      | 2              | 23              | 24              | 8.6957          | 95.8333         | 6.8320          | 0.0000           |                  |
| UP-REGULATED - GENE ONTOLOGY                                        |                                                         |                |                 |                 |                 |                 |                 |                  |                  |
| No.                                                                 | GO Name                                                 | GO Type        | Number Changed  | Number Measured | Number in GO    | Percent Changed | Percent Present | Z Score          | Permuted P Value |
| 1                                                                   | response to unfolded protein                            | P              | 3               | 46              | 55              | 6.5217          | 83.6364         | 9.2090           | 0.0000           |
| 2                                                                   | endoplasmic reticulum                                   | C              | 8               | 529             | 561             | 1.5123          | 94.2959         | 6.5250           | 0.0000           |
| 3                                                                   | cytoplasm                                               | C              | 19              | 3488            | 3969            | 0.5447          | 87.8811         | 4.7660           | 0.0000           |
| 4                                                                   | microsome                                               | C              | 3               | 138             | 148             | 2.1739          | 93.2432         | 4.9670           | 0.0020           |
| 5                                                                   | intracellular                                           | C              | 23              | 6945            | 8118            | 0.3312          | 85.5506         | 2.8170           | 0.0050           |
| 6                                                                   | metabolism                                              | P              | 22              | 6721            | 7938            | 0.3273          | 84.6687         | 2.6410           | 0.0060           |
| DOWN-REGULATED - GENMAPP                                            |                                                         |                |                 |                 |                 |                 |                 |                  |                  |
| No.                                                                 | MAPP Name                                               | Number Changed | Number Measured | Number on MAPP  | Percent Changed | Percent Present | Z Score         | Permuted P Value |                  |
| 1                                                                   | Mm_Reductive_carboxylate_cycle_CO2_fixation_            | 2              | 5               | 15              | 40.0000         | 33.3333         | 9.7920          | 0.0000           |                  |
| 2                                                                   | Mm_Heme_Biosynthesis                                    | 2              | 9               | 9               | 22.2222         | 100.0000        | 7.1810          | 0.0010           |                  |
| 3                                                                   | Mm_Galactose_metabolism                                 | 2              | 19              | 46              | 10.5263         | 41.3044         | 4.7410          | 0.0030           |                  |
| 4                                                                   | Mm_Mitochondrial_fatty_acid_betaoxidation               | 2              | 16              | 16              | 12.5000         | 100.0000        | 5.2320          | 0.0040           |                  |
| DOWN-REGULATED - GENE ONTOLOGY                                      |                                                         |                |                 |                 |                 |                 |                 |                  |                  |
| No.                                                                 | GO Name                                                 | GO Type        | Number Changed  | Number Measured | Number in GO    | Percent Changed | Percent Present | Z Score          | Permuted P Value |
| 1                                                                   | mitochondrion                                           | C              | 15              | 730             | 822             | 2.0548          | 88.8078         | 5.8980           | 0.0000           |
| 2                                                                   | cytoplasm                                               | C              | 33              | 3488            | 3969            | 0.9461          | 87.8811         | 3.9820           | 0.0000           |
| 3                                                                   | oxidoreductase activity                                 | F              | 10              | 663             | 775             | 1.5083          | 85.5484         | 3.6090           | 0.0000           |
| 4                                                                   | catalytic activity                                      | F              | 39              | 4696            | 5420            | 0.8305          | 86.6421         | 3.5580           | 0.0000           |
| 5                                                                   | arylsulfatase activity                                  | F              | 2               | 6               | 7               | 33.3333         | 85.7143         | 11.1590          | 0.0010           |
| 6                                                                   | heme biosynthesis                                       | P              | 2               | 11              | 11              | 18.1818         | 100.0000        | 8.1340           | 0.0010           |
| 7                                                                   | antigen processing\, endogenous antigen via MHC class I | P              | 2               | 20              | 23              | 10.0000         | 86.9565         | 5.8880           | 0.0010           |
| 8                                                                   | mitochondrial inner membrane                            | C              | 6               | 232             | 275             | 2.5862          | 84.3636         | 4.4000           | 0.0010           |
| 9                                                                   | MHC class I protein complex                             | C              | 2               | 25              | 32              | 8.0000          | 78.1250         | 5.1950           | 0.0020           |
| 10                                                                  | MHC class I receptor activity                           | F              | 2               | 28              | 35              | 7.1429          | 80.0000         | 4.8680           | 0.0020           |
| 11                                                                  | sulfuric ester hydrolase activity                       | F              | 2               | 11              | 12              | 18.1818         | 91.6667         | 8.1340           | 0.0030           |
| 12                                                                  | oxygen transporter activity                             | F              | 2               | 17              | 21              | 11.7647         | 80.9524         | 6.4390           | 0.0030           |
| 13                                                                  | lysosome                                                | C              | 4               | 123             | 129             | 3.2520          | 95.3488         | 4.2210           | 0.0030           |
| 14                                                                  | oxygen transport                                        | P              | 2               | 19              | 25              | 10.5263         | 76.0000         | 6.0580           | 0.0040           |
| 15                                                                  | antigen presentation\, endogenous antigen               | P              | 2               | 22              | 25              | 9.0909          | 88.0000         | 5.5840           | 0.0040           |
| 16                                                                  | NADH dehydrogenase (ubiquinone) activity                | F              | 2               | 27              | 39              | 7.4074          | 69.2308         | 4.9710           | 0.0070           |
| 17                                                                  | carbohydrate metabolism                                 | P              | 7               | 442             | 506             | 1.5837          | 87.3518         | 3.1470           | 0.0070           |

TABLE A9

| GENES UP-REGULATED BY OPP IN SPLEENS |            |             |               |             |                                                                                                                                               |
|--------------------------------------|------------|-------------|---------------|-------------|-----------------------------------------------------------------------------------------------------------------------------------------------|
| TargetID                             | Diff_Score | Fold_Change | Symbol        | Accession   | Definition                                                                                                                                    |
| scl38701.12.1_200-S                  | 177.7388   | 2.66        | Arid3a        | NM_007880.1 | Mus musculus AT rich interactive domain 3A (Bright like) (Arid3a), mRNA.                                                                      |
| scl35398.12.2_77-S                   | 161.9746   | 2.75        | Alas1         | NM_020559.1 | Mus musculus aminolevulinic acid synthase 1 (Alas1), mRNA.                                                                                    |
| scl21972.20_222-S                    | 160.1009   | 3           | Sema4a        | NM_013658.2 | Mus musculus sema domain, immunoglobulin domain (Ig), transmembrane domain (TM) and short cytoplasmic domain, (semaphorin) 4A (Sema4a), mRNA. |
| scl0270198.14_257-S                  | 150.8033   | 2.82        | C230090D14    | NM_173019.2 | Mus musculus hypothetical protein C230090D14 (C230090D14), mRNA.                                                                              |
| scl49773.2_28-S                      | 148.7503   | 4.16        | Lrg1          | NM_029796.2 | Mus musculus leucine-rich alpha-2-glycoprotein 1 (Lrg1), mRNA.                                                                                |
| scl021881.14_30-S                    | 143.4326   | 1.85        | Tkt           | NM_009388.2 | Mus musculus transketolase (Tkt), mRNA.                                                                                                       |
| scl012655.1_87-S                     | 138.0005   | 5           | Chi3l3        | NM_009892   | Mus musculus chitinase 3-like 3 (Chi3l3), mRNA.                                                                                               |
| scl30503.2.1_167-S                   | 133.1051   | 4.44        | Ifitm6        | XM_133956.3 |                                                                                                                                               |
| scl0110208.1_282-S                   | 132.4158   | 2.82        | Pgd           | NM_025801.1 | Mus musculus phosphogluconate dehydrogenase (Pgd), mRNA.                                                                                      |
| scl36760.13.1_118-S                  | 132.1993   | 2.03        | Anxa2         | NM_007585.2 | Mus musculus annexin A2 (Anxa2), mRNA.                                                                                                        |
| scl022793.9_329-S                    | 130.0814   | 1.8         | Zyx           | NM_011777.1 | Mus musculus zyxin (Zyx), mRNA.                                                                                                               |
| scl0014751.2_296-S                   | 129.6172   | 2.38        | Gpi1          | NM_008155.1 | Mus musculus glucose phosphate isomerase 1 (Gpi1), mRNA.                                                                                      |
| scl33920.14_231-S                    | 129.181    | 2.49        | Gsr           | NM_010344.3 | Mus musculus glutathione reductase 1 (Gsr), mRNA.                                                                                             |
| scl45515.5.1_34-S                    | 123.3775   | 4.55        | Ctsg          | NM_007800.1 | Mus musculus cathepsin G (Ctsg), mRNA.                                                                                                        |
| scl50898.5.1_60-S                    | 123.2693   | 4.75        | Pt16          | NM_023734.2 |                                                                                                                                               |
| scl22942.3.1_64-S                    | 122.1666   | 2.74        | S100a6        | NM_011313.1 | Mus musculus S100 calcium binding protein A6 (calyculin) (S100a6), mRNA.                                                                      |
| scl0019126.2_253-S                   | 122.0294   | 5.3         | Prom1         | NM_008935.1 | Mus musculus prominin 1 (Prom1), mRNA.                                                                                                        |
| scl28438.14_163-S                    | 121.5518   | 2.39        | Slc2a3        | NM_011401.2 | Mus musculus solute carrier family 2 (facilitated glucose transporter), member 3 (Slc2a3), mRNA.                                              |
| scl018824.1_278-S                    | 120.214    | 2.12        | Pip2          | NM_019755.2 | Mus musculus proteolipid protein 2 (Pip2), mRNA.                                                                                              |
| scl012608.3_48-S                     | 119.9969   | 2.36        | Cebpb         | NM_009883.1 | Mus musculus CCAAT/enhancer binding protein (C/EBP), beta (Cebpb), mRNA.                                                                      |
| scl34345.7_19-S                      | 115.677    | 4.99        | Hp            | NM_017370.1 | Mus musculus haptoglobin (Hp), mRNA.                                                                                                          |
| scl36717.10_331-S                    | 115.5086   | 2.97        | Rab27a        | NM_023635.2 | Mus musculus RAB27A, member RAS oncogene family (Rab27a), mRNA.                                                                               |
| scl41074.16.1_14-S                   | 113.2969   | 3.54        | Mpo           | NM_010824   | Mus musculus myeloperoxidase (Mpo), mRNA.                                                                                                     |
| scl33924.6.9_11-S                    | 109.588    | 1.9         | Ppp2cb        | NM_017374.2 | Mus musculus protein phosphatase 2a, catalytic subunit, beta isoform (Ppp2cb), mRNA.                                                          |
| scl0245195.2_0-S                     | 105.9338   | 4.93        | Retnlg        | NM_181596.2 | Mus musculus resistin like gamma (Retnlg), mRNA.                                                                                              |
| scl00235534.1_198-S                  | 104.1644   | 2.81        | C130099A20Rik | NM_153420.1 |                                                                                                                                               |
| scl0016796.1_242-S                   | 103.3243   | 2.05        | Laspl         | NM_010688.2 | Mus musculus LIM and SH3 protein 1 (Laspl), mRNA.                                                                                             |
| scl20002.16.7_10-S                   | 102.794    | 4.56        | Lbp           | NM_008489   | Mus musculus lipopolysaccharide binding protein (Lbp), mRNA.                                                                                  |
| scl25450.6_639-S                     | 101.9543   | 3.78        | 5730528L13Rik | NM_028137.1 | Mus musculus RIKEN cDNA 5730528L13 gene (5730528L13Rik), mRNA.                                                                                |
| scl31130.14_110-S                    | 101.9276   | 2.49        | Fes           | NM_010194.1 | Mus musculus feline sarcoma oncogene (Fes), mRNA.                                                                                             |
| scl21429.6_290-S                     | 99.8299    | 1.71        | Lmo4          | NM_010723.2 | Mus musculus LIM domain only 4 (Lmo4), mRNA.                                                                                                  |
| scl36920.15.1_107-S                  | 96.1643    | 2           | Pstpip1       | NM_011193.1 | Mus musculus proline-serine-threonine phosphatase-interacting protein 1 (Pstpip1), mRNA.                                                      |
| scl47772.10.1_9-S                    | 94.7984    | 2.81        | Ncf4          | NM_008677.1 | Mus musculus neutrophil cytosolic factor 4 (Ncf4), mRNA.                                                                                      |
| scl016952.2_2-S                      | 94.4381    | 3.41        | Anxa1         | NM_010730.1 | Mus musculus annexin A1 (Anxa1), mRNA.                                                                                                        |
| scl49691.9_66-S                      | 92.3655    | 1.91        | 1700093E07Rik | NM_133685.1 | Mus musculus RIKEN cDNA 1700093E07 gene (1700093E07Rik), mRNA.                                                                                |
| scl32869.6.1_0-S                     | 89.7918    | 1.84        | Gmfg          | NM_022024.1 | Mus musculus glia maturation factor, gamma (Gmfg), mRNA.                                                                                      |
| scl27561.16.206_36-S                 | 89.5431    | 3.46        | Anxa3         | NM_013470.1 | Mus musculus annexin A3 (Anxa3), mRNA.                                                                                                        |
| scl050701.4_101-S                    | 88.8819    | 4.07        | NE            | NM_015779   | Mus musculus neutrophil elastase (NE), mRNA.                                                                                                  |
| scl0074349.2_256-S                   | 88.0091    | 2.48        | 4632419K20Rik | NM_199009.1 | Mus musculus RIKEN cDNA 4632419K20 gene (4632419K20Rik), mRNA.                                                                                |
| scl067689.9_195-S                    | 87.8247    | 2.45        | Aldh3b1       | NM_026316.2 | Mus musculus aldehyde dehydrogenase 3 family, member B1 (Aldh3b1), mRNA.                                                                      |
| scl0003853.1_11-S                    | 87.643     | 2.51        | Lta4h         | NM_008517.1 | Mus musculus leukotriene A4 hydrolase (Lta4h), mRNA.                                                                                          |
| scl50639.3.1_165-S                   | 86.9091    | 6.17        | Trem3         | NM_021407.1 | Mus musculus triggering receptor expressed on myeloid cells 3 (Trem3), mRNA.                                                                  |
| scl066375.2_40-S                     | 86.6477    | 2.17        | Dhrs7         | NM_025522.1 | Mus musculus dehydrogenase/reductase (SDR family) member 7 (Dhrs7), mRNA.                                                                     |
| scl51494.33_412-S                    | 84.2179    | 2.05        | E030006K04Rik | NM_139206.1 | Mus musculus RIKEN cDNA E030006K04 gene (E030006K04Rik), mRNA.                                                                                |
| scl41137.3_142-S                     | 84.0799    | 5.38        | 1700020L24Rik | NM_025492.1 | Mus musculus RIKEN cDNA 1700020L24 gene (1700020L24Rik), mRNA.                                                                                |
| scl34127.7.1_0-S                     | 83.1342    | 4.52        | 1810033B17Rik | XM_110690.2 | Mus musculus RIKEN cDNA 1810033B17 gene (1810033B17Rik), mRNA.                                                                                |
| scl017970.15_30-S                    | 82.707     | 1.98        | Ncf2          | NM_010877   | Mus musculus neutrophil cytosolic factor 2 (Ncf2), mRNA.                                                                                      |
| scl34224.8.1_50-S                    | 80.4056    | 1.56        | Cyba          | NM_007806.1 | Mus musculus cytochrome b-245, alpha polypeptide (Cyba), mRNA.                                                                                |
| scl068713.2_9-S                      | 79.4977    | 1.56        | Ifitm1        | NM_026820   | Mus musculus interferon induced transmembrane protein 1 (Ifitm1), mRNA.                                                                       |
| scl27078.4.1_81-S                    | 78.783     | 2.04        | 0910001L09Rik | XM_132434.2 | Mus musculus RIKEN cDNA 0910001L09 gene (0910001L09Rik), mRNA.                                                                                |
| scl0320078.9_68-S                    | 78.6236    | 3.58        | Olfml2b       | NM_177068.3 |                                                                                                                                               |
| scl0026367.1_126-S                   | 78.1041    | 2.33        | Ceacam2       | NM_007543.2 | Mus musculus CEA-related cell adhesion molecule 2 (Ceacam2), mRNA.                                                                            |
| scl42729.13.1_74-S                   | 77.728     | 2.32        | Adssl1        | NM_007421.1 |                                                                                                                                               |

|                |            |         |      |               |             |                                                                                                                        |
|----------------|------------|---------|------|---------------|-------------|------------------------------------------------------------------------------------------------------------------------|
| scl20865.8     | 33-S       | 76.7349 | 2.83 | Gca           | NM 145523.2 | Mus musculus grancalcin (Gca), mRNA.                                                                                   |
| scl014252.10   | 327-S      | 75.7065 | 2.25 | Flot2         | NM 008028.1 | Mus musculus flotillin 2 (Flot2), mRNA.                                                                                |
| scl37304.10    | 29-S       | 75.1493 | 5.39 | Mmp8          | NM 008611.2 | Mus musculus matrix metalloproteinase 8 (Mmp8), mRNA.                                                                  |
| scl33021.4.288 | 87-S       | 74.8791 | 4.41 | Pglyrp1       | NM 009402.1 | Mus musculus peptidoglycan recognition protein 1 (Pglyrp1), mRNA.                                                      |
| scl41339.16.1  | 19-S       | 73.9063 | 2.46 | Arb2          | NM 145429.1 | Mus musculus arrestin, beta 2 (Arb2), mRNA.                                                                            |
| gl 6679936     | ref NM 008 | 73.7644 | 1.56 |               |             |                                                                                                                        |
| scl014289.2    | 177-S      | 72.9112 | 3.22 | Fpr-rs2       | NM 008039.1 | Mus musculus formyl peptide receptor, related sequence 2 (Fpr-rs2), mRNA.                                              |
| scl46402.6.1   | 29-S       | 72.2488 | 1.68 | Lgals3        | NM 010705.1 | Mus musculus lectin, galactose binding, soluble 3 (Lgals3), mRNA.                                                      |
| Gl 6679936     | S          | 72.1757 | 1.8  | Gapd          | NM 008084.1 | Mus musculus glyceraldehyde-3-phosphate dehydrogenase (Gapd), mRNA.                                                    |
| scl52720.7.1   | 78-S       | 71.2929 | 3.96 | Ms4a3         | NM 133246.2 | Mus musculus membrane-spanning 4-domains, subfamily A, member 3 (Ms4a3), mRNA.                                         |
| scl014433.2    | 76-S       | 70.4827 | 1.86 | Gapd          | NM 008084   | Mus musculus glyceraldehyde-3-phosphate dehydrogenase (Gapd), mRNA.                                                    |
| scl074145.1    | 2-S        | 70.3988 | 3.29 | F13a1         | NM 028784   |                                                                                                                        |
| scl23525.7     | 662-S      | 70.0965 | 1.82 | Aqtrap        | NM 009642.3 | Mus musculus angiotensin II, type I receptor-associated protein (Aqtrap), mRNA.                                        |
| scl0018230.2   | 224-S      | 69.9751 | 1.86 | Nxn           | NM 008750.2 | Mus musculus nucleoredoxin (Nxn), mRNA.                                                                                |
| scl46215.1.1   | 293-S      | 68.6139 | 3.4  | Arl11         | NM 177337.3 |                                                                                                                        |
| scl0053857.2   | 245-S      | 67.3285 | 4.17 | Tuba8         | NM 017379.1 | Mus musculus tubulin, alpha 8 (Tuba8), mRNA.                                                                           |
| scl35378.12    | 17-S       | 67.1574 | 3.04 | Mapkapk3      | NM 178907   |                                                                                                                        |
| scl013806.12   | 49-S       | 66.5394 | 2.11 | Eno1          | NM 023119   | Mus musculus enolase 1, alpha non-neuron (Eno1), mRNA.                                                                 |
| scl43966.3     | 250-S      | 66.4341 | 2.65 | Nfil3         | NM 017373.2 | Mus musculus nuclear factor, interleukin 3, regulated (Nfil3), mRNA.                                                   |
| scl23305.6     | 263-S      | 66.2011 | 3.21 | Gpr160        | XM 130823.3 |                                                                                                                        |
| scl0002552.1   | 594-S      | 65.9619 | 1.52 | Triobp        | NM 138579.2 | Mus musculus TRIO and F-actin binding protein (Triobp), mRNA.                                                          |
| scl35271.8.1   | 43-S       | 65.8349 | 2.91 | Cklfsf7       | NM 133978.1 | Mus musculus chemokine-like factor super family 7 (Cklfsf7), mRNA.                                                     |
| scl19917.13    | 586-S      | 65.56   | 4.3  | Mmp9          | NM 013599.2 | Mus musculus matrix metalloproteinase 9 (Mmp9), mRNA.                                                                  |
| scl35154.1.15  | 20-S       | 65.5458 | 2.97 | 2400009B08Rik | XM 358687.1 | Mus musculus RIKEN cDNA 2400009B08 gene (2400009B08Rik), mRNA.                                                         |
| scl011821.1    | 236-S      | 64.4542 | 2.14 | Aprt          | NM 009698.1 | Mus musculus adenine phosphoribosyl transferase (Aprt), mRNA.                                                          |
| scl27109.17.1  | 35-S       | 64.0687 | 1.57 | Plod3         | NM 011962.2 | Mus musculus procollagen-lysine, 2-oxoglutarate 3-dioxygenase 3 (Plod3), mRNA.                                         |
| scl39250.15    | 28-S       | 63.3882 | 2.17 | Aatk          | NM 007377.1 | Mus musculus apoptosis-associated tyrosine kinase (Aatk), mRNA.                                                        |
| scl067905.1    | 18-S       | 63.2065 | 1.54 | 2810423O19Rik | NM 026447   | Mus musculus RIKEN cDNA 2810423O19 gene (2810423O19Rik), transcript variant 1, mRNA.                                   |
| scl42194.2     | 0-S        | 62.8876 | 4.54 | Dio2          | NM 010050   | Mus musculus deiodinase, iodothyronine, type II (Dio2), mRNA.                                                          |
| scl28812.19    | 190-S      | 62.355  | 2.11 | Hk2           | NM 013820.1 | Mus musculus hexokinase 2 (Hk2), mRNA.                                                                                 |
| scl34064.10    | 3-S        | 61.627  | 2.63 | F10           | NM 007972.2 | Mus musculus coagulation factor X (F10), mRNA.                                                                         |
| scl0020661.1   | 145-S      | 61.3907 | 1.89 | Sort1         | NM 019972   | Mus musculus sortilin 1 (Sort1), mRNA.                                                                                 |
| scl43488.6     | 364-S      | 60.9435 | 1.61 | Snag1         | NM 130796.1 | Mus musculus sorting nexin associated golgi protein 1 (Snag1), mRNA.                                                   |
| scl0017523.2   | 246-S      | 60.7962 | 3.47 | Mpo           | NM 010824.1 | Mus musculus myeloperoxidase (Mpo), mRNA.                                                                              |
| scl018655.12   | 25-S       | 60.5693 | 1.83 | Pgk1          | NM 008828   | Mus musculus phosphoglycerate kinase 1 (Pgk1), mRNA.                                                                   |
| scl50849.26.1  | 265-S      | 60.3933 | 2.04 | Myo1f         | NM 053214.1 | Mus musculus myosin IF (Myo1f), mRNA.                                                                                  |
| scl52308.5.1   | 95-S       | 59.4846 | 2.17 | Csf2ra        | NM 009970.1 | Mus musculus colony stimulating factor 2 receptor, alpha, low-affinity (granulocyte-macrophage) (Csf2ra), mRNA.        |
| scl23461.27    | 162-S      | 59.4831 | 1.64 | Kcnab2        | NM 010598.2 | Mus musculus potassium voltage-gated channel, shaker-related subfamily, beta member 2 (Kcnab2), mRNA.                  |
| scl32703.15.1  | 0-S        | 58.8422 | 2.25 | Pnkp          | NM 021549.1 | Mus musculus polynucleotide kinase 3-phosphatase (Pnkp), mRNA.                                                         |
| scl0023845.2   | 228-S      | 58.6269 | 2.29 | Clecsf5       | NM 021364.1 | Mus musculus C-type (calcium dependent, carbohydrate-recognition domain) lectin, superfamily member 5 (Clecsf5), mRNA. |
| scl0207777.9   | 233-S      | 58.5508 | 4.03 | Bzap1         | NM 172449.1 | Mus musculus benzodiazepine receptor associated protein 1 (Bzap1), mRNA.                                               |
| scl0022591.2   | 289-S      | 58.3405 | 2.85 | Xpc           | NM 009531.1 | Mus musculus xeroderma pigmentosum, complementation group C (Xpc), mRNA.                                               |
| scl46266.2     | 361-S      | 58.1673 | 4.18 | Ltb4r1        | NM 008519.1 | Mus musculus leukotriene B4 receptor 1 (Ltb4r1), mRNA.                                                                 |
| scl011777.6    | 49-S       | 58.0383 | 2.02 | Ap3s1         | NM 009681.2 | Mus musculus adaptor-related protein complex 3, sigma 1 subunit (Ap3s1), mRNA.                                         |
| scl011674.2    | 46-S       | 57.3537 | 2.06 | Aldoa         | NM 007438.2 |                                                                                                                        |
| scl21336.8     | 145-S      | 56.8663 | 1.52 | 3110001A13Rik | NM 025626.3 | Mus musculus RIKEN cDNA 3110001A13 gene (3110001A13Rik), mRNA.                                                         |
| scl018405.4    | 2-S        | 55.7594 | 4.37 | Orm1          | NM 008768.1 | Mus musculus orosomucoid 1 (Orm1), mRNA.                                                                               |
| scl34132.19.1  | 1-S        | 54.5609 | 1.5  | Stxbp2        | NM 011503.2 | Mus musculus syntaxin binding protein 2 (Stxbp2), mRNA.                                                                |
| scl22689.16.1  | 37-S       | 54.5119 | 1.68 | Sdfr2         | NM 009146   | Mus musculus stromal cell derived factor receptor 2 (Sdfr2), mRNA.                                                     |
| scl45684.12    | 151-S      | 54.4907 | 1.52 | D14Erd226e    | NM 145928   | Mus musculus DNA segment, Chr 14, ERATO Doi 226, expressed (D14Erd226e), mRNA.                                         |
| scl16317.12    | 198-S      | 53.8349 | 1.96 | Mapkapk2      | NM 008551.1 | Mus musculus MAP kinase-activated protein kinase 2 (Mapkapk2), mRNA.                                                   |
| scl0004022.1   | 70-S       | 53.7937 | 1.69 | Arpc1b        | NM 023142.1 | Mus musculus actin related protein 2/3 complex, subunit 1B (Arpc1b), mRNA.                                             |
| scl30727.6.1   | 169-S      | 53.2772 | 2.13 | Igsf6         | NM 030691.1 | Mus musculus immunoglobulin superfamily, member 6 (Igsf6), mRNA.                                                       |
| scl0378460.6   | 10-S       | 52.8484 | 8.23 | 4632424B03Rik | XM 128537.3 | Mus musculus RIKEN cDNA 4632424B03 gene (4632424B03Rik), mRNA.                                                         |
| scl012986.17   | 26-S       | 52.6157 | 2.73 | Csf3r         | NM 007782.1 | Mus musculus colony stimulating factor 3 receptor (granulocyte) (Csf3r), mRNA.                                         |
| scl30153.32    | 359-S      | 52.6145 | 19.4 | Mgam          | XM 133071.2 |                                                                                                                        |

|                     |         |       |               |              |                                                                                                                           |
|---------------------|---------|-------|---------------|--------------|---------------------------------------------------------------------------------------------------------------------------|
| scl18037.10.1 70-S  | 52.6026 | 18.68 | Il1r2         | NM 010555.2  | Mus musculus interleukin 1 receptor, type II (Il1r2), mRNA.                                                               |
| scl38707.5.30 13-S  | 52.1451 | 4.09  | Prt3          | NM 011178.2  | Mus musculus proteinase 3 (Prt3), mRNA.                                                                                   |
| scl25159.19.1 9-S   | 51.8008 | 1.85  | 2810475A17Rik | NM 028355.1  | Mus musculus RIKEN cDNA 2810475A17 gene (2810475A17Rik), mRNA.                                                            |
| scl50768.5 1-S      | 51.7844 | 1.44  | 2310014H01Rik | XM 355011.1  | Mus musculus RIKEN cDNA 2310014H01 gene (2310014H01Rik), mRNA.                                                            |
| scl16390.7 3-S      | 51.5634 | 1.7   | Ralb          | NM 022327.3  | Mus musculus v-ral simian leukemia viral oncogene homolog B (ras related) (Ralb), mRNA.                                   |
| scl32949.5.149 25-S | 51.4288 | 3.82  | Ceacam10      | NM 007675.2  | Mus musculus CEA-related cell adhesion molecule 10 (Ceacam10), mRNA.                                                      |
| scl33481.17.1 142-S | 51.1403 | 6.47  | Cpne2         | NM 153507.2  | Mus musculus copine II (Cpne2), mRNA.                                                                                     |
| scl0112407.1 41-S   | 50.8773 | 4.63  | Egln3         | NM 028133.1  | Mus musculus EGL nine homolog 3 (C. elegans) (Egln3), mRNA.                                                               |
| scl018746.1 82-S    | 50.7045 | 2.61  | Pkm2          | NM 011099.2  | Mus musculus pyruvate kinase, muscle (Pkm2), mRNA.                                                                        |
| scl50763.13.1 199-S | 50.4259 | 1.7   | Flot1         | NM 008027.1  | Mus musculus flotillin 1 (Flot1), mRNA.                                                                                   |
| scl34795.4.1 9-S    | 50.3475 | 1.67  | Sap30         | NM 021788.1  | Mus musculus sin3 associated polypeptide (Sap30), mRNA.                                                                   |
| scl49245.4 458-S    | 50.3267 | 5.2   | 1500031L02Rik | NM 025892.1  | Mus musculus RIKEN cDNA 1500031L02 gene (1500031L02Rik), mRNA.                                                            |
| scl054672.8 79-S    | 49.6359 | 2.87  | Gpr97         | NM 173036.2  | Mus musculus G protein-coupled receptor 97 (Gpr97), mRNA.                                                                 |
| scl30062.4.1 1-S    | 49.5887 | 1.96  | Npy           | NM 023456.2  | Mus musculus neuropeptide Y (Npy), mRNA.                                                                                  |
| scl33753.14 134-S   | 49.2227 | 1.44  | Atp6v1b2      | NM 007509.2  | Mus musculus ATPase, H+ transporting, V1 subunit B, isoform 2 (Atp6v1b2), mRNA.                                           |
| scl00230709.1 4-S   | 48.6561 | 1.8   | Zmpste24      | NM 172700.1  | Mus musculus zinc metalloproteinase, STE24 homolog (S. cerevisiae) (Zmpste24), mRNA.                                      |
| scl26700.8.1 2-S    | 48.4696 | 1.62  | 0610009O03Rik | NM 026660.2  | Mus musculus RIKEN cDNA 0610009O03 gene (0610009O03Rik), mRNA.                                                            |
| scl0012874.1 259-S  | 47.8375 | 2.1   | Cpd           | NM 007754.1  | Mus musculus carboxypeptidase D (Cpd), mRNA.                                                                              |
| scl42371.18.1 30-S  | 47.7175 | 4.15  | Pygl          | NM 133198.1  | Mus musculus liver glycogen phosphorylase (Pygl), mRNA.                                                                   |
| scl36309.11 147-S   | 47.536  | 1.8   | Abhd5         | NM 026179.1  | Mus musculus abhydrolase domain containing 5 (Abhd5), mRNA.                                                               |
| scl0014733.2 286-S  | 47.3074 | 2.17  | Gpc1          | NM 016696.1  | Mus musculus glypican 1 (Gpc1), mRNA.                                                                                     |
| scl0067742.1 215-S  | 47.2492 | 1.59  | Samsn1        | NM 023380.1  | Mus musculus SAM domain, SH3 domain and nuclear localisation signals, 1 (Samsn1), mRNA.                                   |
| scl011867.9 22-S    | 47.0802 | 1.65  | Arpc1b        | NM 023142.1  | Mus musculus actin related protein 2/3 complex, subunit 1B (Arpc1b), mRNA.                                                |
| scl44121.8 285-S    | 47.0159 | 3.07  | Serp1b1a      | NM 025429.1  | Mus musculus serine (or cysteine) proteinase inhibitor, clade B, member 1a (Serp1b1a), mRNA.                              |
| scl36385.5 13-S     | 46.4355 | 1.54  | Cklfsf6       | NM 026036.1  | Mus musculus chemokine-like factor super family 6 (Cklfsf6), mRNA.                                                        |
| scl45160.32 9-S     | 46.1822 | 2.09  | Abcc4         | XM 139262.2  | Mus musculus ATP-binding cassette, sub-family C (CFTR/MRP), member 4 (Abcc4), mRNA.                                       |
| scl0072141.1 1-S    | 46.0449 | 3.02  | Adpgk         | NM 028121.1  |                                                                                                                           |
| scl37440.14 650-S   | 45.8546 | 1.68  | Irak3         | NM 028679.2  | Mus musculus interleukin-1 receptor-associated kinase 3 (Irak3), mRNA.                                                    |
| scl0020861.2 171-S  | 45.7838 | 6.09  | Sifa1         | NM 001001332 | Mus musculus stefin A1 (Sifa1), mRNA.                                                                                     |
| scl46955.19 187-S   | 45.7413 | 2.18  | B230369L08Rik | NM 194342    |                                                                                                                           |
| scl48225.31 410-S   | 44.755  | 1.74  | Tiam1         | NM 009384.1  | Mus musculus T-cell lymphoma invasion and metastasis 1 (Tiam1), mRNA.                                                     |
| scl43914.11.4 21-S  | 44.668  | 1.57  | H2afy         | NM 012015.1  | Mus musculus H2A histone family, member Y (H2afy), mRNA.                                                                  |
| scl34521.8.1 20-S   | 44.5067 | 1.76  | BC004022      | XM 134557.1  | Mus musculus cDNA sequence BC004022 (BC004022), mRNA.                                                                     |
| scl25240.12 194-S   | 44.3524 | 1.55  | Pgm2          | NM 028132    | Mus musculus phosphoglucomutase 2 (Pgm2), mRNA.                                                                           |
| scl28328.8.1 45-S   | 43.9772 | 9.87  | Kira17        | NM 133203    | Mus musculus killer cell lectin-like receptor, subfamily A, member 17 (Kira17), mRNA.                                     |
| scl0014191.2 145-S  | 43.4806 | 1.64  | Fgr           | NM 010208.2  | Mus musculus Gardner-Rasheed feline sarcoma viral (Fgr) oncogene homolog (Fgr), mRNA.                                     |
| scl054722.1 159-S   | 43.2271 | 8.63  | Dfna5h        | XM 147318.1  | Mus musculus deafness, autosomal dominant 5 homolog (human) (Dfna5h), mRNA.                                               |
| scl44868.8 25-S     | 43.1492 | 1.95  | Gcnt2         | NM 008105.2  | Mus musculus glucosaminyl (N-acetyl) transferase 2, l-branching enzyme (Gcnt2), transcript variant 3, mRNA.               |
| scl069583.1 127-S   | 42.9846 | 1.67  | Tnfsf13       | NM 023517.1  | Mus musculus tumor necrosis factor (ligand) superfamily, member 13 (Tnfsf13), mRNA.                                       |
| scl53023.9 185-S    | 42.6139 | 6.68  | 4930538D17Rik | NM 029186.1  | Mus musculus RIKEN cDNA 4930538D17 gene (4930538D17Rik), mRNA.                                                            |
| scl50873.6.1 76-S   | 42.4855 | 1.64  | 1500032D16Rik | NM 030087.1  | Mus musculus RIKEN cDNA 1500032D16 gene (1500032D16Rik), mRNA.                                                            |
| scl013723.9 229-S   | 42.247  | 1.98  | Emb           | NM 010330.2  | Mus musculus embigin (Emb), mRNA.                                                                                         |
| scl53436.18.1 9-S   | 41.4501 | 1.57  | Tcirg1        | NM 016921.2  | Mus musculus T-cell, immune regulator 1 (Tcirg1), mRNA.                                                                   |
| scl17197.4 15-S     | 41.3415 | 1.74  | Tagln2        | NM 178598.1  | Mus musculus transgelin 2 (Tagln2), mRNA.                                                                                 |
| scl016828.6 330-S   | 41.3184 | 1.5   | Ldh1          | NM 010699.1  | Mus musculus lactate dehydrogenase 1, A chain (Ldh1), mRNA.                                                               |
| scl49589.13.8 8-S   | 41.1247 | 1.61  | 2810036L13Rik | NM 144802.2  | Mus musculus RIKEN cDNA 2810036L13 gene (2810036L13Rik), mRNA.                                                            |
| scl0083921.1 123-S  | 41.1206 | 2.15  | Tmem2         | NM 031997.2  | Mus musculus transmembrane protein 2 (Tmem2), mRNA.                                                                       |
| scl54435.12.1 121-S | 40.9588 | 1.43  | Was           | NM 009515.1  | Mus musculus Wiskott-Aldrich syndrome homolog (human) (Was), mRNA.                                                        |
| scl23214.8.1 66-S   | 40.6213 | 3.08  | Mgst2         | NM 174995.1  | Mus musculus microsomal glutathione S-transferase 2 (Mgst2), mRNA.                                                        |
| scl054610.1 1-S     | 40.6127 | 1.6   | Tbc1d8        | NM 018775.1  | Mus musculus TBC1 domain family, member 8 (Tbc1d8), mRNA.                                                                 |
| scl011964.1 274-S   | 40.6024 | 1.55  | Atp6v1a1      | NM 007508.2  | Mus musculus ATPase, H+ transporting, V1 subunit A, isoform 1 (Atp6v1a1), mRNA.                                           |
| scl012765.6 0-S     | 40.2226 | 2.05  | Il8rb         | NM 009909.2  | Mus musculus interleukin 8 receptor, beta (Il8rb), mRNA.                                                                  |
| scl00100017.2 199-S | 40.1967 | 1.55  | AA691260      | NM 145554.1  | Mus musculus expressed sequence AA691260 (AA691260), mRNA.                                                                |
| scl16186.5.1 30-S   | 39.971  | 1.62  | Rgs18         | NM 022881.2  | Mus musculus regulator of G-protein signaling 18 (Rgs18), mRNA.                                                           |
| scl40534.12.1 29-S  | 39.9435 | 1.54  | Tbrg4         | NM 134011.1  | Mus musculus transforming growth factor beta regulated gene 4 (Tbrg4), mRNA.                                              |
| scl0277333.1 280-S  | 39.8186 | 1.67  | MGC68323      | NM 199472.1  | Mus musculus similar to glyceraldhyde-3-phosphate dehydrogenase (phosphorylating) (EC 1.2.1.12) - mouse (MGC68323), mRNA. |



|                      |         |      |               |             |                                                                                                                        |
|----------------------|---------|------|---------------|-------------|------------------------------------------------------------------------------------------------------------------------|
| scl00234797.2_307-S  | 38.8116 | 1.73 | 6430548M08Rik | NM 172286.2 | Mus musculus RIKEN cDNA 6430548M08 gene (6430548M08Rik), mRNA.                                                         |
| scl30672.9.1_29-S    | 38.7339 | 1.5  | Ppp4c         | NM 019674.2 | Mus musculus protein phosphatase 4, catalytic subunit (Ppp4c), mRNA.                                                   |
| scl31356.7.1_27-S    | 38.4871 | 1.44 | Emp3          | NM 010129   | Mus musculus epithelial membrane protein 3 (Emp3), mRNA.                                                               |
| scl0002191.1_543-S   | 38.3957 | 2.06 | Svil          | NM 153153   | Mus musculus supervillin (Svil), mRNA.                                                                                 |
| scl51004.4_55-S      | 38.2238 | 1.71 | Sepr1         | NM 013759.1 |                                                                                                                        |
| scl20642.5.1_21-S    | 38.0252 | 3.01 | Sfp1          | NM 011355.1 | Mus musculus SFFV proviral integration 1 (Sfp1), mRNA.                                                                 |
| scl38135.15_73-S     | 38.0106 | 2.43 | Myb           | NM 010848.2 | Mus musculus myeloblastosis oncogene (Myb), mRNA.                                                                      |
| scl000172.1_1-S      | 37.8641 | 2.26 | Gmfg          | NM 022024.1 | Mus musculus gila maturation factor, gamma (Gmfg), mRNA.                                                               |
| scl000527.1_11-S     | 37.761  | 4.88 | Ms4a3         | NM 133246.2 | Mus musculus membrane-spanning 4-domains, subfamily A, member 3 (Ms4a3), mRNA.                                         |
| scl29264.8.1_214-S   | 37.7023 | 2.34 | Tcfec         | NM 031198.1 | Mus musculus transcription factor EC (Tfec), mRNA.                                                                     |
| scl012512.6_24-S     | 37.5595 | 1.87 | Cd63          | NM 007653.1 | Mus musculus Cd63 antigen (Cd63), mRNA.                                                                                |
| scl017474.5_5-S      | 36.9744 | 2.81 | Clecsf8       | NM 010819.1 | Mus musculus C-type (calcium dependent, carbohydrate recognition domain) lectin, superfamily member 8 (Clecsf8), mRNA. |
| scl41300.23_511-S    | 36.9048 | 1.42 | Atp2a3        | NM 016745.2 | Mus musculus ATPase, Ca++ transporting, ubiquitous (Atp2a3), mRNA.                                                     |
| scl44463.11.22_177-S | 36.7738 | 1.63 | Smn1          | NM 011420.1 |                                                                                                                        |
| scl0056722.2_11-S    | 36.6369 | 1.35 | Litaf         | NM 019980.1 | Mus musculus LPS-induced TN factor (Litaf), mRNA.                                                                      |
| scl26663.16_246-S    | 36.2871 | 1.37 | Wdr1          | NM 011715.1 | Mus musculus WD repeat domain 1 (Wdr1), mRNA.                                                                          |
| scl50917.9.3_9-S     | 36.2421 | 4.42 | Mapk13        | NM 011950.1 | Mus musculus mitogen activated protein kinase 13 (Mapk13), mRNA.                                                       |
| scl0012659.1_5-S     | 36.1239 | 3.61 | Ovgp1         | NM 007696.2 | Mus musculus oviductal glycoprotein 1 (Ovgp1), mRNA.                                                                   |
| scl000135.1_51-S     | 35.5586 | 2.37 | Nkg7          | NM 024253.3 | Mus musculus natural killer cell group 7 sequence (Nkg7), mRNA.                                                        |
| scl26949.8.1_14-S    | 35.4348 | 4.07 | Alox5ap       | NM 009663   | Mus musculus arachidonate 5-lipoxygenase activating protein (Alox5ap), mRNA.                                           |
| scl0001732.1_22-S    | 35.0146 | 2.45 | Sepr1         | NM 013759.1 |                                                                                                                        |
| scl30807.22.1_70-S   | 34.7359 | 1.47 | Mrv1          | NM 194464.1 | Mus musculus MRV integration site 1 (Mrv1), transcript variant 1, mRNA.                                                |
| scl0242700.9_212-S   | 34.6494 | 3.85 | Il28ra        | NM 174851.2 | Mus musculus interleukin 28 receptor alpha (Il28ra), mRNA.                                                             |
| scl0003321.1_53-S    | 34.5316 | 4.09 | Fcnb          | XM 130120.1 | Mus musculus ficolin B (Fcnb), mRNA.                                                                                   |
| scl41147.2_666-S     | 34.4353 | 1.88 | Sifn1         | NM 011407.1 | Mus musculus schlafen 1 (Sifn1), mRNA.                                                                                 |
| scl36902.11_284-S    | 34.332  | 1.43 | Scamp2        | NM 022813.2 | Mus musculus secretory carrier membrane protein 2 (Scamp2), mRNA.                                                      |
| scl0014571.1_161-S   | 34.3199 | 1.61 | Gpd2          | NM 010274.2 | Mus musculus glycerol phosphate dehydrogenase 2, mitochondrial (Gpd2), mRNA.                                           |
| scl068089.7_12-S     | 34.2431 | 1.57 | Arpc4         | NM 026552   | Mus musculus actin related protein 2/3 complex, subunit 4 (Arpc4), mRNA.                                               |
| scl0019336.1_63-S    | 33.9742 | 1.68 | Rab24         | NM 009000.2 | Mus musculus RAB24, member RAS oncogene family (Rab24), mRNA.                                                          |
| scl28522.14.1_1-S    | 33.7133 | 5.12 | 9030407H20Rik | NM 144805.1 | Mus musculus RIKEN cDNA 9030407H20 gene (9030407H20Rik), mRNA.                                                         |
| scl16258.13.1_64-S   | 33.6867 | 1.65 | Rnpep         | NM 145417   | Mus musculus arginyl aminopeptidase (aminopeptidase B) (Rnpep), mRNA.                                                  |
| scl19446.4_4-S       | 33.6048 | 3.7  | Lcn2          | NM 008491.1 | Mus musculus lipocalin 2 (Lcn2), mRNA.                                                                                 |
| scl50794.7.1_43-S    | 33.3363 | 1.5  | Clic1         | NM 033444.1 | Mus musculus chloride intracellular channel 1 (Clic1), mRNA.                                                           |
| scl018950.7_181-S    | 33.2694 | 1.46 | Pnp           | NM 013632.2 | Mus musculus purine-nucleoside phosphorylase (Pnp), mRNA.                                                              |
| scl0110253.14_323-S  | 33.2441 | 1.4  | Triobb        | NM 138579.2 | Mus musculus TRIO and F-actin binding protein (Triobb), mRNA.                                                          |
| scl48582.2_713-S     | 33.1814 | 1.55 | Gp5           | NM 008148.2 | Mus musculus glycoprotein 5 (platelet) (Gp5), mRNA.                                                                    |
| scl33039.2.1_179-S   | 33.0056 | 2.94 | Ptgir         | NM 008967.1 | Mus musculus prostaglandin I receptor (IP) (Ptgir), mRNA.                                                              |
| scl021991.1_200-S    | 32.8239 | 1.65 | Tp1           | NM 009415.1 |                                                                                                                        |
| scl24620.16_177-S    | 32.6204 | 1.32 | BC004012      | NM 138671   | Mus musculus cDNA sequence BC004012 (BC004012), mRNA.                                                                  |
| scl0059069.1_170-S   | 32.6013 | 1.32 | Tpm3          | NM 022314.2 | Mus musculus tropomyosin 3, gamma (Tpm3), mRNA.                                                                        |
| scl066151.5_253-S    | 32.5835 | 1.31 | 1110020C13Rik | NM 025385.2 | Mus musculus RIKEN cDNA 1110020C13 gene (1110020C13Rik), mRNA.                                                         |
| scl0110196.3_64-S    | 32.3891 | 1.88 | Fdps          | NM 134469.2 | Mus musculus farnesyl diphosphate synthetase (Fdps), mRNA.                                                             |
| scl017002.17_74-S    | 32.21   | 3.06 | Ltf           | NM 008522.2 | Mus musculus lactotransferrin (Ltf), mRNA.                                                                             |
| scl17239.5.1_240-S   | 32.1646 | 1.69 | Fcrl3         | NM 144559.1 | Mus musculus Fc receptor-like 3 (Fcrl3), mRNA.                                                                         |
| scl36089.6_17-S      | 31.9133 | 1.49 | 2310075A12Rik | NM 178027.3 |                                                                                                                        |
| scl41130.3.1_26-S    | 31.8848 | 2.17 | 1100001G20Rik | NM 183249.1 | Mus musculus RIKEN cDNA 1100001G20 gene (1100001G20Rik), mRNA.                                                         |
| scl27250.2_266-S     | 31.5112 | 1.95 | D730049H07Rik | NM 175423   | Mus musculus RIKEN cDNA D730049H07 gene (D730049H07Rik), mRNA.                                                         |
| scl0002340.1_98-S    | 31.2171 | 1.67 | Nin           | NM 008697   | Mus musculus ninein (Nin), mRNA.                                                                                       |
| scl017063.13_302-S   | 31.2045 | 2.2  | Ly64          | NM 010739.1 | Mus musculus lymphocyte antigen 64 (Ly64), mRNA.                                                                       |
| scl41521.1.2_20-S    | 31.0848 | 2.22 | 4930438A08Rik | XM 126175.2 | Mus musculus RIKEN cDNA 4930438A08 gene (4930438A08Rik), mRNA.                                                         |
| scl0022608.1_233-S   | 31.0426 | 1.28 | Nsep1         | NM 011732.1 | Mus musculus nuclease sensitive element binding protein 1 (Nsep1), mRNA.                                               |
| scl30675.13.1_1-S    | 30.986  | 1.3  | Coro1a        | NM 009898.2 | Mus musculus coronin, actin binding protein 1A (Coro1a), mRNA.                                                         |
| scl016784.1_5-S      | 30.9448 | 1.34 | Lamp2         | NM 010685.2 | Mus musculus lysosomal membrane glycoprotein 2 (Lamp2), mRNA.                                                          |
| scl51416.9_257-S     | 30.8775 | 5.55 | Lox           | NM 010728.1 | Mus musculus lysyl oxidase (Lox), mRNA.                                                                                |
| scl000502.1_59-S     | 30.8698 | 2.44 | Prdx5         | NM 012021.1 | Mus musculus peroxiredoxin 5 (Prdx5), mRNA.                                                                            |
| scl26323.5.1_40-S    | 30.5963 | 1.72 | Plac8         | NM 139198.1 | Mus musculus placenta-specific 8 (Plac8), mRNA.                                                                        |

|               |            |         |       |               |              |                                                                                        |
|---------------|------------|---------|-------|---------------|--------------|----------------------------------------------------------------------------------------|
| scl35598.8    | 175-S      | 30.5218 | 1.7   | Mapk6         | NM_015806.2  | Mus musculus mitogen-activated protein kinase 6 (Mapk6), mRNA.                         |
| scl0003450.1  | 9-S        | 30.1398 | 2.12  | Cklfsf7       | NM_133978.1  | Mus musculus chemokine-like factor super family 7 (Cklfsf7), mRNA.                     |
| scl020861.1   | 5-S        | 29.9964 | 10.38 | Sf1a1         | NM_001001332 | Mus musculus stefin A1 (Sf1a1), mRNA.                                                  |
| scl52691.13   | 82-S       | 29.9437 | 1.71  | Psat1         | XM_129211.2  | Mus musculus phosphoserine aminotransferase 1 (Psat1), mRNA.                           |
| scl35222.4    | 425-S      | 29.9389 | 2.1   | Myd88         | NM_010851    | Mus musculus myeloid differentiation primary response gene 88 (Myd88), mRNA.           |
| scl30947.3    | 219-S      | 29.8038 | 1.6   | Rhog          | NM_019566.2  | Mus musculus ras homolog gene family, member G (Rhog), mRNA.                           |
| scl18197.5    | 22-S       | 29.7097 | 1.4   | Rgs19         | NM_026446.2  | Mus musculus regulator of G-protein signaling 19 (Rgs19), mRNA.                        |
| scl00234825.2 | 277-S      | 29.1477 | 1.4   | Klhdc4        | NM_145605.1  |                                                                                        |
| scl52908.26   | 6_30-S     | 28.8941 | 1.44  | 2610041P08Rik | NM_198008.1  | Mus musculus RIKEN cDNA 2610041P08 gene (2610041P08Rik), mRNA.                         |
| scl33694.4    | 117-S      | 28.8729 | 1.33  | Pgls          | NM_025396.1  | Mus musculus 6-phosphogluconolactonase (Pgls), mRNA.                                   |
| scl0213673.3  | 37-S       | 28.7827 | 1.45  | 9530068E07Rik | XM_203329.2  | Mus musculus RIKEN cDNA 9530068E07 gene (9530068E07Rik), mRNA.                         |
| scl0276770.1  | 104-S      | 28.7242 | 1.41  | Eif5a         | NM_181582.2  | Mus musculus eukaryotic translation initiation factor 5A (Eif5a), mRNA.                |
| scl0020862.1  | 160-S      | 28.3977 | 10.46 | Sf1a2         | XM_148531.3  | Mus musculus stefin A2 (Sf1a2), mRNA.                                                  |
| scl0078334.1  | 222-S      | 28.2837 | 1.47  | 2700084L06Rik | NM_198164.1  | Mus musculus RIKEN cDNA 2700084L06 gene (2700084L06Rik), mRNA.                         |
| scl012530.13  | 135-S      | 28.2018 | 1.89  | Cdc25a        | NM_007658    | Mus musculus cell division cycle 25 homolog A (S. cerevisiae) (Cdc25a), mRNA.          |
| scl32756.4    | 1_7-S      | 28.0063 | 2.49  | Nkg7          | NM_024253    | Mus musculus natural killer cell group 7 sequence (Nkg7), mRNA.                        |
| scl47133      | 29_179-S   | 27.8524 | 1.63  | Ddef1         | NM_010026.1  | Mus musculus development and differentiation enhancing (Ddef1), mRNA.                  |
| scl19517.6    | 242-S      | 27.8296 | 1.31  | Surf4         | NM_011512.2  | Mus musculus surflet gene 4 (Surf4), mRNA.                                             |
| scl45774.17   | 1_29-S     | 27.8216 | 1.44  | Prkcd         | NM_011103.1  | Mus musculus protein kinase C, delta (Prkcd), mRNA.                                    |
| scl072042.2   | 8-S        | 27.8143 | 1.86  | Cotl1         | XM_150115.1  | Mus musculus coactosin-like 1 (Dictyostelium) (Cotl1), mRNA.                           |
| scl012331.2   | 166-S      | 27.7137 | 1.32  | Cap1          | NM_007598.2  | Mus musculus CAP, adenylate cyclase-associated protein 1 (yeast) (Cap1), mRNA.         |
| scl29744.12   | 13-S       | 27.6622 | 1.72  | 1200015A22Rik | NM_028766.1  | Mus musculus RIKEN cDNA 1200015A22 gene (1200015A22Rik), mRNA.                         |
| scl54134.13   | 56-S       | 27.5631 | 3.59  | G6pdx         | NM_008062.1  | Mus musculus glucose-6-phosphate dehydrogenase X-linked (G6pdx), mRNA.                 |
| scl20145.4    | 1_7-S      | 27.318  | 4.16  | Cst7          | NM_009977.1  | Mus musculus cystatin F (leukocystatin) (Cst7), mRNA.                                  |
| scl48556.8    | 18-S       | 27.188  | 1.33  | 2010319C14Rik | NM_024464.2  | Mus musculus RIKEN cDNA 2010319C14 gene (2010319C14Rik), mRNA.                         |
| scl37715.13   | 93-S       | 27.1217 | 3.51  | Lmbn2         | NM_010722.2  | Mus musculus lamin B2 (Lmbn2), mRNA.                                                   |
| scl38698.8    | 214-S      | 26.8665 | 1.41  | Cnn2          | NM_007725.1  | Mus musculus calponin 2 (Cnn2), mRNA.                                                  |
| scl28709.9    | 141-S      | 26.49   | 1.29  | Abtb1         | NM_030251.1  | Mus musculus ankyrin repeat and BTB (POZ) domain containing 1 (Abtb1), mRNA.           |
| scl0023821.2  | 49-S       | 26.4696 | 1.45  | Bace1         | NM_011792.3  | Mus musculus beta-site APP cleaving enzyme 1 (Bace1), mRNA.                            |
| scl00394432.2 | 137-S      | 26.2339 | 2.48  | Ugt1a10       | NM_201642    |                                                                                        |
| scl42858.13   | 56-S       | 26.1544 | 1.48  | Rin3          | NM_177620.2  | Mus musculus Ras and Rab interactor 3 (Rin3), mRNA.                                    |
| scl36146.3    | 205-S      | 26.0953 | 1.35  | Cdkn2d        | NM_009878.2  | Mus musculus cyclin-dependent kinase inhibitor 2D (p19, inhibits CDK4) (Cdkn2d), mRNA. |
| scl020195.2   | 6-S        | 26.0905 | 1.81  | S100a11       | NM_016740    | Mus musculus S100 calcium binding protein A11 (calizzarin) (S100a11), mRNA.            |
| scl071784.1   | 62-S       | 26.0782 | 2.93  | 1110007C02Rik | NM_027923.1  | Mus musculus RIKEN cDNA 1110007C02 gene (1110007C02Rik), mRNA.                         |
| scl0030955.2  | 290-S      | 26.0576 | 1.41  | Pik3cg        | NM_020272.1  | Mus musculus phosphoinositide-3-kinase, catalytic, gamma polypeptide (Pik3cg), mRNA.   |
| scl0072685.1  | 143-S      | 25.8438 | 1.55  | Dnajc6        | NM_198412.1  | Mus musculus DnaJ (Hsp40) homolog, subfamily C, member 6 (Dnajc6), mRNA.               |
| scl16996.9    | 1_203-S    | 25.8007 | 13    | 4930418G15Rik | NM_145692.1  |                                                                                        |
| scl31009.10   | 67-S       | 25.6067 | 2.33  | Dgat2         | NM_026384.2  | Mus musculus diacylglycerol O-acyltransferase 2 (Dgat2), mRNA.                         |
| scl54141.46   | 3_34-S     | 25.5567 | 1.37  | Fina          | XM_289920.2  | Mus musculus filamin, alpha (Fina), mRNA.                                              |
| scl000111.1   | 99-S       | 25.2804 | 1.31  | Coro1a        | NM_009898.2  | Mus musculus coronin, actin binding protein 1A (Coro1a), mRNA.                         |
| scl50576.26   | 1_29-S     | 25.1698 | 1.46  | Vav1          | NM_011691.2  | Mus musculus vav 1 oncogene (Vav1), mRNA.                                              |
| scl33196.2    | 1635_134-S | 25.141  | 2.13  | Rhou          | NM_133955.1  | Mus musculus ras homolog gene family, member U (Rhou), mRNA.                           |
| scl0054683.2  | 242-S      | 25.1015 | 1.98  | Prdx5         | NM_012021.1  | Mus musculus peroxiredoxin 5 (Prdx5), mRNA.                                            |
| scl41842.10   | 1_70-S     | 24.8912 | 4.16  | Upp1          | NM_009477.1  | Mus musculus uridine phosphorylase 1 (Upp1), mRNA.                                     |
| scl056378.6   | 20-S       | 24.5889 | 1.38  | Arpc3         | NM_019824.2  | Mus musculus actin related protein 2/3 complex, subunit 3 (Arpc3), mRNA.               |
| scl39908.21   | 1_34-S     | 24.5384 | 1.77  | Cpd           | NM_007754.1  | Mus musculus carboxypeptidase D (Cpd), mRNA.                                           |
| scl064382.1   | 42-S       | 24.3121 | 1.56  | Ms4a6d        | NM_026835.1  | Mus musculus membrane-spanning 4-domains, subfamily A, member 11 (Ms4a11), mRNA.       |
| scl50935.5    | 66-S       | 24.2356 | 1.83  | Hmga1         | NM_016660.1  | Mus musculus high mobility group AT-hook 1 (Hmga1), mRNA.                              |
| scl18985.4    | 291-S      | 23.9705 | 1.43  | Slc35c1       | NM_145832.2  |                                                                                        |
| scl0231807.1  | 240-S      | 23.8969 | 1.61  | BC037034      | NM_153161.1  | Mus musculus cDNA sequence BC037034 (BC037034), mRNA.                                  |
| scl00102103.1 | 84-S       | 23.8366 | 3.79  | Mtus1         | NM_178902.3  | Mus musculus mitochondrial tumor suppressor 1 (Mtus1), mRNA.                           |
| scl080876.2   | 10-S       | 23.8155 | 1.77  | Iitm2         | NM_030694    | Mus musculus interferon induced transmembrane protein 2 (Iitm2), mRNA.                 |
| scl54485.6    | 175-S      | 23.4874 | 1.53  | Piga          | NM_011081.1  | Mus musculus phosphatidylinositol glycan, class A (Piga), mRNA.                        |
| scl29411.4    | 6_15-S     | 23.3167 | 1.79  | Mgst1         | NM_019946.3  | Mus musculus microsomal glutathione S-transferase 1 (Mgst1), mRNA.                     |
| scl016541.8   | 1-S        | 23.2856 | 1.43  | Napsa         | NM_008437.1  |                                                                                        |
| scl021937.10  | 167-S      | 23.1485 | 1.38  | Tnfrsf1a      | NM_011609.2  | Mus musculus tumor necrosis factor receptor superfamily, member 1a (Tnfrsf1a), mRNA.   |

|                |           |         |       |               |             |                                                                                                                 |
|----------------|-----------|---------|-------|---------------|-------------|-----------------------------------------------------------------------------------------------------------------|
| scl50208.9     | 12-S      | 23.1179 | 1.67  | Gbl           | NM_019988.2 | Mus musculus G protein beta subunit-like (Gbl), mRNA.                                                           |
| scl37649.7     | 307-S     | 23.0994 | 1.56  | 1200002N14Rik | NM_027878.1 | Mus musculus RIKEN cDNA 1200002N14 gene (1200002N14Rik), mRNA.                                                  |
| scl27205.18    | 385-S     | 22.9503 | 1.79  | Aacs          | NM_030210.1 | Mus musculus acetoacetyl-CoA synthetase (Aacs), mRNA.                                                           |
| scl41405.25    | 9-S       | 22.8023 | 2.36  | Gas7          | NM_008088   | Mus musculus growth arrest specific 7 (Gas7), mRNA.                                                             |
| scl0107934.22  | 249-S     | 22.7214 | 6.19  | Celsr3        | NM_080437.1 | Mus musculus cadherin EGF LAG seven-pass G-type receptor 3 (Celsr3), mRNA.                                      |
| scl47670.15    | 189-S     | 22.6491 | 1.69  | Parvg         | NM_022321.2 | Mus musculus parvin, gamma (Parvg), mRNA.                                                                       |
| scl013244.1    | 23-S      | 22.59   | 1.29  | Degs          | NM_007853.2 | Mus musculus degenerative spermatocyte homolog (Drosophila) (Degs), mRNA.                                       |
| scl37316.9.1   | 41-S      | 22.5853 | 1.85  | Casp4         | NM_007609.1 | Mus musculus caspase 4, apoptosis-related cysteine protease (Casp4), mRNA.                                      |
| scl46585.22    | 265-S     | 22.557  | 1.34  | Vcl           | NM_009502   | Mus musculus vinculin (Vcl), mRNA.                                                                              |
| scl52675.8.401 | 6-S       | 22.4657 | 1.44  | Ostf1         | NM_017375.1 | Mus musculus osteoclast stimulating factor 1 (Ostf1), mRNA.                                                     |
| scl0230709.2   | 6-S       | 22.423  | 2.1   | Zmpste24      | NM_172700.1 | Mus musculus zinc metalloproteinase, STE24 homolog (S. cerevisiae) (Zmpste24), mRNA.                            |
| scl18632.11    | 218-S     | 22.3331 | 1.42  | Rassf2        | NM_175445.3 | Mus musculus Ras association (RalGDS/AF-6) domain family 2 (Rassf2), mRNA.                                      |
| scl39819.5     | 328-S     | 22.1603 | 3.06  | Ccl9          | NM_011338   | Mus musculus chemokine (C-C motif) ligand 9 (Ccl9), mRNA.                                                       |
| scl37751.5.62  | 171-S     | 22.1444 | 10.55 | Prssl1        | XM_196763.2 |                                                                                                                 |
| scl52790.5     | 512-S     | 21.9702 | 1.8   | 1810055G02Rik | NM_028077.1 | Mus musculus RIKEN cDNA 1810055G02 gene (1810055G02Rik), mRNA.                                                  |
| scl19499.9.1   | 0-S       | 21.9338 | 3.44  | Fcnb          | XM_130120.1 | Mus musculus ficolin B (Fcnb), mRNA.                                                                            |
| scl35462.25    | 609-S     | 21.8188 | 1.32  | Pik3cb        | NM_029094.1 | Mus musculus phosphatidylinositol 3-kinase, catalytic, beta polypeptide (Pik3cb), mRNA.                         |
| scl0009.1      | 32-S      | 21.7075 | 2.86  | Pnkp          | NM_021549.1 | Mus musculus polynucleotide kinase 3-phosphatase (Pnkp), mRNA.                                                  |
| scl53163.10.1  | 0-S       | 21.6956 | 6.12  | 1200008O12Rik | NM_028760.1 | Mus musculus RIKEN cDNA 1200008O12 gene (1200008O12Rik), mRNA.                                                  |
| scl069101.5    | 23-S      | 21.6653 | 1.87  | 1810015A11Rik | XM_148046.3 | Mus musculus RIKEN cDNA 1810015A11 gene (1810015A11Rik), mRNA.                                                  |
| scl34254.8     | 613-S     | 21.6284 | 1.34  | Zdhc7         | NM_133967.2 | Mus musculus zinc finger, DHHC domain containing 7 (Zdhc7), mRNA.                                               |
| scl28929.1     | 28-S      | 21.6036 | 2.38  | Tacstd2       | NM_020047.2 | Mus musculus tumor-associated calcium signal transducer 2 (Tacstd2), mRNA.                                      |
| scl26088.14.1  | 16-S      | 21.5141 | 1.34  | Aldh2         | NM_009656.1 | Mus musculus aldehyde dehydrogenase 2, mitochondrial (Aldh2), mRNA.                                             |
| scl022038.3    | 2-S       | 21.446  | 3.08  | Plscr1        | NM_011636.1 | Mus musculus phospholipid scramblase 1 (Plscr1), mRNA.                                                          |
| scl0020660.2   | 10-S      | 21.4444 | 1.45  | Sorl1         | NM_011436   | Mus musculus sortilin-related receptor, LDLR class A repeats-containing (Sorl1), mRNA.                          |
| scl00230316.2  | 241-S     | 21.4425 | 2.4   | Egfl5         | NM_172694.1 | Mus musculus EGF-like domain, multiple 5 (Egfl5), mRNA.                                                         |
| scl36516.9.290 | 30-S      | 21.4408 | 1.7   | Ptk9l         | NM_011876.2 | Mus musculus protein tyrosine kinase 9-like (A6-related protein) (Ptk9l), mRNA.                                 |
| scl00216971.1  | 119-S     | 21.3847 | 1.49  | BC017647      | NM_145430.1 | Mus musculus cDNA sequence BC017647 (BC017647), mRNA.                                                           |
| scl40050.12    | 410-S     | 21.3841 | 1.39  | Ndel1         | NM_023668.1 | Mus musculus nuclear distribution gene E-like homolog 1 (A. nidulans) (Ndel1), mRNA.                            |
| scl50927.13.1  | 12-S      | 21.2682 | 1.95  | Def6          | NM_027185.1 | Mus musculus differentially expressed in FDCEP 6 (Def6), mRNA.                                                  |
| scl030931.1    | 245-S     | 21.207  | 1.37  | Dyt1          | NM_144884.1 | Mus musculus dystonia 1 (Dyt1), mRNA.                                                                           |
| scl00230257.2  | 191-S     | 21.115  | 1.35  | Rod1          | NM_144904.1 | Mus musculus ROD1 regulator of differentiation 1 (S. pombe) (Rod1), mRNA.                                       |
| scl23697.3.1   | 58-S      | 21.0586 | 1.53  | Sh3bgrl3      | NM_080559.1 | Mus musculus SH3 domain binding glutamic acid-rich protein-like 3 (Sh3bgrl3), mRNA.                             |
| scl00233046.2  | 82-S      | 21.0346 | 7.85  | Rasgrp4       | NM_145149.1 | Mus musculus RAS guanyl releasing protein 4 (Rasgrp4), mRNA.                                                    |
| scl00218581.2  | 84-S      | 21.028  | 1.36  | Depdc1b       | NM_178683.2 |                                                                                                                 |
| scl014862.2    | 242-S     | 20.9678 | 1.89  | Gstm1         | NM_010358.2 | Mus musculus glutathione S-transferase, mu 1 (Gstm1), mRNA.                                                     |
| scl33129.9     | 499-S     | 20.9638 | 1.33  | Suv420h2      | NM_146177.1 |                                                                                                                 |
| scl000075.1    | 18 REVCOM | 20.9358 | 1.38  | AA959742      | NM_133807.1 | Mus musculus expressed sequence AA959742 (AA959742), mRNA.                                                      |
| scl20444.23.1  | 130-S     | 20.8933 | 1.48  | Bub1b         | NM_009773   | Mus musculus budding uninhibited by benzimidazoles 1 homolog, beta (S. cerevisiae) (Bub1b), mRNA.               |
| scl015331.1    | 246-S     | 20.6317 | 1.46  | Hmgn2         | NM_016957.2 | Mus musculus high mobility group nucleosomal binding domain 2 (Hmgn2), mRNA.                                    |
| scl22994.6     | 49-S      | 20.6004 | 1.37  | Ssr2          | NM_025448.2 | Mus musculus signal sequence receptor, beta (Ssr2), mRNA.                                                       |
| scl53421.25    | 339-S     | 20.5607 | 1.39  | D19Erd703e    | NM_029456.1 | Mus musculus DNA segment, Chr 19, ERATO Doi 703, expressed (D19Erd703e), mRNA.                                  |
| scl030963.1    | 56-S      | 20.5155 | 1.44  | Ptpla         | NM_013935.1 | Mus musculus protein tyrosine phosphatase-like (proline instead of catalytic arginine), member a (Ptpla), mRNA. |
| scl39392.13.1  | 3-S       | 20.4994 | 1.62  | D11Erd498e    | NM_145940.1 | Mus musculus DNA segment, Chr 11, ERATO Doi 498, expressed (D11Erd498e), mRNA.                                  |
| scl013728.1    | 329-S     | 20.4404 | 1.24  | Mark2         | NM_007928.1 | Mus musculus MAP/microtubule affinity-regulating kinase 2 (Mark2), mRNA.                                        |
| scl39705.9     | 188 7-S   | 20.3489 | 1.54  | 6820428D13    | NM_177752.2 | Mus musculus hypothetical protein 6820428D13 (6820428D13), mRNA.                                                |
| scl48826.10.1  | 4-S       | 20.2782 | 2.38  | Mefv          | NM_019453.1 | Mus musculus Mediterranean fever (Mefv), mRNA.                                                                  |
| scl066989.6    | 1-S       | 20.2522 | 1.31  | 2410004N11Rik | NM_025888.2 | Mus musculus RIKEN cDNA 2410004N11 gene (2410004N11Rik), mRNA.                                                  |
| scl18719.12.1  | 11-S      | 20.1896 | 11.96 | Hdc           | NM_008230   | Mus musculus histidine decarboxylase (Hdc), mRNA.                                                               |
| scl0018728.1   | 38-S      | 20.0412 | 1.54  | Pira5         |             |                                                                                                                 |

**GENES DOWN-REGULATED BY OPP IN SPLEENS**

| TargetID      | Diff Score | Fold Change | Symbol | Accession | Definition  |                                                                   |
|---------------|------------|-------------|--------|-----------|-------------|-------------------------------------------------------------------|
| scl31155.10   | 11-S       | -150.3732   | -2.36  | Mfge8     | NM_008594   | Mus musculus milk fat globule-EGF factor 8 protein (Mfge8), mRNA. |
| scl017110.1   | 293-S      | -110.2585   | -5.82  | Lzp-s     | NM_013590.2 | Mus musculus P lysozyme structural (Lzp-s), mRNA.                 |
| scl24842.10.1 | 114-S      | -92.4965    | -1.71  | Rhced     | NM_011270.2 | Mus musculus Rhesus blood group CE and D (Rhced), mRNA.           |
| scl39449.6.1  | 88-S       | -86.3639    | -2.28  | Cd79b     | NM_008339.1 | Mus musculus CD79B antigen (Cd79b), mRNA.                         |

|               |           |          |       |               |             |                                                                                                                          |
|---------------|-----------|----------|-------|---------------|-------------|--------------------------------------------------------------------------------------------------------------------------|
| scl0012045.1  | 114-S     | -85.6766 | -2.31 | Bcl2a1b       | NM_007534   | Mus musculus B-cell leukemia/lymphoma 2 related protein A1b (Bcl2a1b), mRNA.                                             |
| scl49992.7.1  | 104-S     | -77.7966 | -2.21 | Aif1          | NM_019467.2 | Mus musculus allograft inflammatory factor 1 (Aif1), mRNA.                                                               |
| scl0012047.1  | 125-S     | -74.0994 | -2.44 | Bcl2a1d       | NM_007536   | Mus musculus B-cell leukemia/lymphoma 2 related protein A1d (Bcl2a1d), mRNA.                                             |
| scl000673.1   | 3-S       | -72.1369 | -1.53 | Prdx2         | NM_011563   | Mus musculus peroxiredoxin 2 (Prdx2), mRNA.                                                                              |
| scl32668.4.1  | 181-S     | -70.6727 | -3.7  | Dbp           | NM_016974.1 | Mus musculus D site albumin promoter binding protein (Dbp), mRNA.                                                        |
| scl32898.7.1  | 80-S      | -66.458  | -1.54 | Blvrb         | NM_144923   | Mus musculus biliverdin reductase B (flavin reductase (NADPH)) (Blvrb), mRNA.                                            |
| scl50010.18.1 | 105-S     | -65.9185 | -1.76 | H2-Bf         | NM_008198.1 | Mus musculus histocompatibility 2, complement component factor B (H2-Bf), mRNA.                                          |
| scl26445.6.1  | 1-S       | -65.7973 | -1.76 | Igfbp7        | NM_008048.1 | Mus musculus insulin-like growth factor binding protein 7 (Igfbp7), mRNA.                                                |
| scl0012044.1  | 118-S     | -63.9154 | -2.41 | Bcl2a1a       | NM_009742.2 | Mus musculus B-cell leukemia/lymphoma 2 related protein A1a (Bcl2a1a), mRNA.                                             |
| scl015024.2   | 236-S     | -63.1097 | -2.06 | H2-T10        | NM_010395.2 | Mus musculus histocompatibility 2, T region locus 10 (H2-T10), mRNA.                                                     |
| scl44840.4    | 185-S     | -61.3393 | -3.14 | Cd83          | NM_009856.1 | Mus musculus CD83 antigen (Cd83), mRNA.                                                                                  |
| scl24887.7    | 12-S      | -60.4783 | -1.81 | Sdc3          | NM_011520.2 | Mus musculus syndecan 3 (Sdc3), mRNA.                                                                                    |
| scl50824.6.23 | 33-S      | -60.1189 | -2.36 | H2-Eb1        | NM_010382.1 | Mus musculus histocompatibility 2, class II antigen E beta (H2-Eb1), mRNA.                                               |
| scl40203.12   | 25-S      | -59.9973 | -1.74 | Sparc         | NM_009242   | Mus musculus secreted acidic cysteine rich glycoprotein (Sparc), mRNA.                                                   |
| scl42795.16.1 | 26-S      | -56.4908 | -2.4  | Evl           | NM_007965.2 | Mus musculus Ena-vasodilator stimulated phosphoprotein (Evl), mRNA.                                                      |
| scl33241.10   | 186-S     | -52.9856 | -2.06 | Icbsp1        | NM_008320.2 | Mus musculus interferon consensus sequence binding protein 1 (Icbsp1), mRNA.                                             |
| scl0002344.1  | 54-S      | -52.5567 | -1.62 | Serpina1b     | NM_009244.2 | Mus musculus serine (or cysteine) proteinase inhibitor, clade A, member 1b (Serpina1b), mRNA.                            |
| scl50575.22.1 | 51-S      | -52.1957 | -1.96 | Emr1          | NM_010130.1 | Mus musculus EGF-like module containing, mucin-like, hormone receptor-like sequence 1 (Emr1), mRNA.                      |
| scl0054725.2  | 225-S     | -51.3813 | -2.45 | Igsf4a        | NM_018770.2 | Mus musculus immunoglobulin superfamily, member 4A (Igsf4a), transcript variant 3, mRNA.                                 |
| scl44935.7    | 355-S     | -51.004  | -1.91 | Serpina6b     | NM_011454.1 | Mus musculus serine (or cysteine) proteinase inhibitor, clade B, member 6b (Serpina6b), mRNA.                            |
| scl15950.5.1  | 27-S      | -50.2892 | -2.91 | BB219290      | NM_145141.1 | Mus musculus expressed sequence BB219290 (BB219290), mRNA.                                                               |
| scl0020452.1  | 241-S     | -49.5814 | -1.67 | Siat8d        | NM_009183.1 | Mus musculus sialyltransferase 8 (alpha-2, 8-sialyltransferase) D (Siat8d), mRNA.                                        |
| scl41638.9.1  | 29-S      | -48.4644 | -2.01 | Timd4         | NM_178759.3 |                                                                                                                          |
| scl45915.9    | 517-S     | -47.8759 | -2.41 | Dnase1l3      | NM_007870.2 | Mus musculus deoxyribonuclease 1-like 3 (Dnase1l3), mRNA.                                                                |
| scl024047.3   | 30-S      | -47.6093 | -2.89 | Ccl19         | NM_011888   | Mus musculus chemokine (C-C motif) ligand 19 (Ccl19), mRNA.                                                              |
| gi_30794511   | ref NM 01 | -47.5664 | -1.42 | Hmbs          | NM_013551.1 | Mus musculus hydroxymethylbilane synthase (Hmbs), mRNA.                                                                  |
| scl00333883.1 | 4-S       | -47.0033 | -3.02 | Cd59b         | NM_181858.1 | Mus musculus CD59b antigen (Cd59b), mRNA.                                                                                |
| scl40209.28.1 | 48-S      | -46.9617 | -2    | Anxa6         | NM_013472.2 | Mus musculus annexin A6 (Anxa6), mRNA.                                                                                   |
| scl015032.1   | 236-S     | -46.8994 | -1.66 | H2-T17        | NM_010396   | Mus musculus histocompatibility 2, T region locus 17 (H2-T17), mRNA.                                                     |
| scl071994.3   | 187-S     | -45.7307 | -1.87 | Cnn3          | NM_028044.1 | Mus musculus calponin 3, acidic (Cnn3), mRNA.                                                                            |
| scl45393.10   | 71-S      | -45.5954 | -1.4  | Bnip3l        | NM_009761.2 | Mus musculus BCL2/adenovirus E1B 19kDa-interacting protein 3-like (Bnip3l), mRNA.                                        |
| scl50024.4.1  | 14-S      | -44.9565 | -2.22 | H2-Ea         | NM_010381.2 | Mus musculus histocompatibility 2, class II antigen E alpha (H2-Ea), mRNA.                                               |
| scl068066.1   | 115-S     | -44.9504 | -1.46 | D11Erd333e    | NM_026542.1 |                                                                                                                          |
| scl0001934.1  | 38-S      | -44.719  | -1.43 | Lmna          | NM_019390.1 | Mus musculus lamin A (Lmna), mRNA.                                                                                       |
| scl32943.6.1  | 71-S      | -43.9534 | -1.97 | Cd79a         | NM_007655.1 | Mus musculus CD79A antigen (immunoglobulin-associated alpha) (Cd79a), mRNA.                                              |
| scl24261.12.1 | 29-S      | -43.488  | -1.36 | Alad          | NM_008525.3 | Mus musculus aminolevulinatase, delta-, dehydratase (Alad), mRNA.                                                        |
| scl012406.1   | 153-S     | -43.2846 | -2.36 | Serpinh1      | NM_009825   | Mus musculus serine (or cysteine) proteinase inhibitor, clade H, member 1 (Serpinh1), mRNA.                              |
| scl056620.6   | 30-S      | -43.2818 | -1.93 | Clecsf10      | NM_020001.1 | Mus musculus C-type (calcium dependent, carbohydrate recognition domain) lectin, superfamily member 10 (Clecsf10), mRNA. |
| scl0012192.2  | 207-S     | -43.255  | -1.93 | Zip36l1       | NM_007564.2 | Mus musculus zinc finger protein 36, C3H type-like 1 (Zip36l1), mRNA.                                                    |
| scl42115.9.1  | 121-S     | -42.5817 | -3.01 | Asb2          | NM_023049.1 | Mus musculus ankyrin repeat and SOCS box-containing protein 2 (Asb2), mRNA.                                              |
| scl35771.8.1  | 41-S      | -42.224  | -1.73 | 2410076l21Rik | XM_134948.2 | Mus musculus RIKEN cDNA 2410076l21 gene (2410076l21Rik), mRNA.                                                           |
| scl35076.15.1 | 19-S      | -42.0972 | -1.97 | Gas6          | NM_019521.1 | Mus musculus growth arrest specific 6 (Gas6), mRNA.                                                                      |
| scl22880.8.1  | 176-S     | -41.7557 | -1.58 | Ctss          | NM_021281.1 | Mus musculus cathepsin S (Ctss), mRNA.                                                                                   |
| scl0015312.2  | 169-S     | -41.6335 | -1.38 | Hmgn1         | NM_008251.3 | Mus musculus high mobility group nucleosomal binding domain 1 (Hmgn1), mRNA.                                             |
| scl39660.7    | 333-S     | -41.342  | -1.59 | Al415282      | NM_134021.1 | Mus musculus expressed sequence Al415282 (Al415282), mRNA.                                                               |
| scl0012443.2  | 180-S     | -40.6239 | -3.34 | Ccnd1         | NM_007631.1 | Mus musculus cyclin D1 (Ccnd1), mRNA.                                                                                    |
| scl015953.2   | 220-S     | -40.1407 | -1.58 | Ifi47         | NM_008330.1 | Mus musculus interferon gamma inducible protein (Ifi47), mRNA.                                                           |
| scl014204.4   | 298-S     | -39.6029 | -2.8  | Il4i1         | NM_010215.1 | Mus musculus interleukin 4 induced 1 (Il4i1), mRNA.                                                                      |
| scl056812.9   | 277-S     | -39.5462 | -1.65 | Dnajb10       | NM_178055.2 | Mus musculus Dnaj (Hsp40) homolog, subfamily B, member 10 (Dnajb10), mRNA.                                               |
| scl000591.1   | 21-S      | -39.5074 | -1.89 | Ifi30         | NM_023065.2 | Mus musculus interferon gamma inducible protein 30 (Ifi30), mRNA.                                                        |
| scl50736.3.1  | 4-S       | -39.431  | -2.86 | Ubd           | NM_023137.2 | Mus musculus ubiquitin D (Ubd), mRNA.                                                                                    |
| scl29767.12   | 42-S      | -38.7882 | -1.46 | Mgll          | NM_011844.3 | Mus musculus monoglyceride lipase (Mgll), mRNA.                                                                          |
| scl42725.12.1 | 79-S      | -38.3939 | -1.81 | Al132321      | NM_178911.2 | Mus musculus expressed sequence Al132321 (Al132321), mRNA.                                                               |
| scl16803.9    | 203-S     | -38.3231 | -1.68 | Slc40a1       | NM_016917.1 | Mus musculus solute carrier family 40 (iron-regulated transporter), member 1 (Slc40a1), mRNA.                            |
| scl26112.11   | 493-S     | -38.1338 | -3.17 | Dtx1          | NM_008052.1 | Mus musculus deltex 1 homolog (Drosophila) (Dtx1), mRNA.                                                                 |
| scl098766.1   | 292-S     | -38.047  | -1.41 | Ubacd1        | NM_133835.1 | Mus musculus ubiquitin associated domain containing 1 (Ubacd1), mRNA.                                                    |

|                  |       |          |       |               |             |                                                                                                 |
|------------------|-------|----------|-------|---------------|-------------|-------------------------------------------------------------------------------------------------|
| scl00192657.1    | 320-S | -37.8008 | -1.75 | Elf2          | NM 138953.1 | Mus musculus elongation factor RNA polymerase II 2 (Elf2), mRNA.                                |
| scl0017329.2     | 123-S | -37.7309 | -3.19 | Cxcl9         | NM 008599.1 | Mus musculus chemokine (C-X-C motif) ligand 9 (Cxcl9), mRNA.                                    |
| scl55061.19.1    | 283-S | -37.3568 | -1.39 | Slc38a5       | NM 172479.1 |                                                                                                 |
| scl0002580.1     | 4-S   | -37.0297 | -1.8  | Ptp4a3        | NM 008975.2 | Mus musculus protein tyrosine phosphatase 4a3 (Ptp4a3), mRNA.                                   |
| scl50025.7.1     | 85-S  | -36.8415 | -2.58 | H2-Aa         | NM 010378.2 | Mus musculus histocompatibility 2, class II antigen A, alpha (H2-Aa), mRNA.                     |
| scl52495.17.1    | 252-S | -36.7346 | -1.94 | Blnk          | NM 008528.3 | Mus musculus B-cell linker (Blnk), mRNA.                                                        |
| scl38917.7       | 7-S   | -36.6364 | -1.47 | Gja1          | NM 010288.2 | Mus musculus gap junction membrane channel protein alpha 1 (Gja1), mRNA.                        |
| scl000781.1      | 68-S  | -36.5623 | -1.79 | Kif21b        | NM 019962.2 | Mus musculus kinesin family member 21B (Kif21b), mRNA.                                          |
| scl012521.1      | 26-S  | -36.56   | -1.39 | Kai1          | NM 007856.1 | Mus musculus kangai 1 (suppression of tumorigenicity 6, prostate) (Kai1), mRNA.                 |
| scl0000100.1     | 15-S  | -36.498  | -2.33 | Tnxb          | NM 031176.1 | Mus musculus tenascin XB (Tnxb), mRNA.                                                          |
| scl0108927.4     | 201-S | -36.4952 | -1.98 | 2810489O06Rik | NM 175386.3 | Mus musculus RIKEN cDNA 2810489O06 gene (2810489O06Rik), mRNA.                                  |
| scl016149.9      | 25-S  | -36.2526 | -2.31 | li            | NM 010545.2 | Mus musculus la-associated invariant chain (li), mRNA.                                          |
| scl15766.4.1     | 27-S  | -36.0119 | -1.58 | 1110060M21Rik | NM 025424.1 | Mus musculus RIKEN cDNA 1110060M21 gene (1110060M21Rik), mRNA.                                  |
| scl52537.9       | 557-S | -35.9963 | -1.58 | Lip1          | NM 021460.1 | Mus musculus lysosomal acid lipase 1 (Lip1), mRNA.                                              |
| scl43224.11.1    | 2-S   | -35.7321 | -3.29 | Coch          | NM 007728.2 | Mus musculus coagulation factor C homolog (Limulus polyphemus) (Coch), mRNA.                    |
| scl45133.3       | 447-S | -35.6225 | -2.22 | Ebi2          | NM 183031.1 | Mus musculus Epstein-Barr virus induced gene 2 (Ebi2), mRNA.                                    |
| scl012988.1      | 164-S | -35.4879 | -1.5  | Csk           | NM 007783.2 | Mus musculus c-src tyrosine kinase (Csk), mRNA.                                                 |
| scl39273.6       | 263-S | -35.41   | -1.61 | Lgals3bp      | NM 011150.1 | Mus musculus lectin, galactoside-binding, soluble, 3 binding protein (Lgals3bp), mRNA.          |
| scl0012934.1     | 152-S | -35.0037 | -1.47 | Dpysl2        | NM 009955.2 | Mus musculus dihydropyrimidinase-like 2 (Dpysl2), mRNA.                                         |
| scl067869.4      | 264-S | -34.7112 | -1.38 | Paip2         | NM 026420.1 | Mus musculus polyadenylate-binding protein-interacting protein 2 (Paip2), mRNA.                 |
| scl078416.2      | 288-S | -34.6518 | -2.25 | Rnase6        | NM 030098.1 | Mus musculus ribonuclease A family, member 6 (Rnase6), mRNA.                                    |
| scl15755.10.583  | 56-S  | -34.2306 | -2.15 | Traf5         | NM 011633.1 | Mus musculus Tnf receptor-associated factor 5 (Traf5), mRNA.                                    |
| scl48501.9       | 645-S | -34.1575 | -2    | Cd86          | NM 019388.2 | Mus musculus CD86 antigen (Cd86), mRNA.                                                         |
| scl30833.27      | 114-S | -33.7314 | -1.49 | St5           | NM 029811.1 | Mus musculus suppression of tumorigenicity 5 (St5), mRNA.                                       |
| scl39506.28.1461 | 10-S  | -33.7135 | -1.44 | Slc4a1        | NM 011403.1 | Mus musculus solute carrier family 4 (anion exchanger), member 1 (Slc4a1), mRNA.                |
| scl019122.2      | 199-S | -33.7062 | -1.34 | Prnp          | NM 011170.1 | Mus musculus prion protein (Prnp), mRNA.                                                        |
| scl31867.15.2675 | 48-S  | -33.6962 | -1.47 | Lsp1          | NM 019391.1 | Mus musculus lymphocyte specific 1 (Lsp1), mRNA.                                                |
| scl49300.12      | 501-S | -33.6366 | -1.67 | St6gal1       | NM 145933.2 | Mus musculus beta galactoside alpha 2,6 sialyltransferase 1 (St6gal1), mRNA.                    |
| scl015903.3      | 124-S | -33.491  | -1.93 | Irb3          | NM 008321.1 | Mus musculus inhibitor of DNA binding 3 (Irb3), mRNA.                                           |
| scl31518.8.1     | 186-S | -33.4102 | -3.16 | Rog           | NM 021397   | Mus musculus repressor of GATA (Rog), mRNA.                                                     |
| scl0001712.1     | 14-S  | -33.2107 | -2.35 | Aif1          | NM 019467.2 | Mus musculus allograft inflammatory factor 1 (Aif1), mRNA.                                      |
| scl51913.28      | 530-S | -32.8277 | -2.09 | Slc12a2       | NM 009194.1 | Mus musculus solute carrier family 12, member 2 (Slc12a2), mRNA.                                |
| scl0069104.1     | 104-S | -32.7629 | -1.36 | 2700055A20Rik | NM 027314.2 |                                                                                                 |
| scl41212.9.1     | 219-S | -32.5685 | -4.15 | Rab34         | NM 033475.2 | Mus musculus RAB34, member of RAS oncogene family (Rab34), mRNA.                                |
| scl47072.5       | 281-S | -32.4885 | -2.29 | Ly6a          | NM 010738.2 | Mus musculus lymphocyte antigen 6 complex, locus A (Ly6a), mRNA.                                |
| scl40613.6.1     | 112-S | -32.3026 | -1.88 | Fn3k          | NM 022014.1 | Mus musculus fructosamine 3 kinase (Fn3k), mRNA.                                                |
| scl29467.5.1     | 148-S | -31.5862 | -1.55 | Ocil          | NM 053109.1 | Mus musculus osteoclast inhibitory lectin (Ocil), mRNA.                                         |
| scl067804.15     | 75-S  | -31.486  | -1.4  | Snx2          | NM 026386.1 | Mus musculus sorting nexin 2 (Snx2), mRNA.                                                      |
| scl018477.6      | 2-S   | -31.4275 | -1.3  | Prdx1         | NM 011034.2 | Mus musculus peroxiredoxin 1 (Prdx1), mRNA.                                                     |
| scl0066748.2     | 33-S  | -31.3084 | -1.56 | 4933404M02Rik | NM 025744.1 | Mus musculus RIKEN cDNA 4933404M02 gene (4933404M02Rik), mRNA.                                  |
| scl012517.2      | 30-S  | -31.2889 | -2.17 | Cd72          | NM 007654.1 | Mus musculus CD72 antigen (Cd72), mRNA.                                                         |
| scl0072691.1     | 193-S | -31.0601 | -1.58 | 2810048G17Rik | NM 133746.2 | Mus musculus RIKEN cDNA 2810048G17 gene (2810048G17Rik), mRNA.                                  |
| scl021858.1      | 100-S | -30.8885 | -1.58 | Timp2         | NM 011594.2 | Mus musculus tissue inhibitor of metalloproteinase 2 (Timp2), mRNA.                             |
| scl018458.3      | 17-S  | -30.8526 | -1.29 | Pabpc1        | NM 008774.2 | Mus musculus poly A binding protein, cytoplasmic 1 (Pabpc1), mRNA.                              |
| scl014998.4      | 34-S  | -30.8218 | -2.1  | H2-Dma        | NM 010386   | Mus musculus histocompatibility 2, class II, locus Dma (H2-Dma), mRNA.                          |
| scl0117109.5     | 26-S  | -30.7588 | -1.53 | Pop5          | NM 026398.2 | Mus musculus processing of precursor 5, ribonuclease P/MRP family (S. cerevisiae) (Pop5), mRNA. |
| scl020926.1      | 330-S | -30.6275 | -1.41 | Supt6h        | NM 009297.1 | Mus musculus suppressor of Ty 6 homolog (S. cerevisiae) (Supt6h), mRNA.                         |
| scl38222.21      | 67-S  | -30.4085 | -2.04 | Sash1         | NM 175155.3 |                                                                                                 |
| scl016173.8      | 28-S  | -30.2566 | -1.88 | Il18          | NM 008360.1 | Mus musculus interleukin 18 (Il18), mRNA.                                                       |
| scl37236.8       | 286-S | -30.1638 | -2.14 | Icam1         | NM 010493.2 | Mus musculus intercellular adhesion molecule (Icam1), mRNA.                                     |
| scl0012709.2     | 191-S | -30.0998 | -1.86 | Ckb           | NM 021273.2 | Mus musculus creatine kinase, brain (Ckb), mRNA.                                                |
| scl26218.7.1     | 61-S  | -30.0063 | -1.66 | AW049829      | NM 153571.1 | Mus musculus expressed sequence AW049829 (AW049829), mRNA.                                      |
| scl014790.2      | 94-S  | -30.0029 | -1.53 | Grc10         | NM 013535.1 | Mus musculus gene rich cluster, C10 gene (Grc10), mRNA.                                         |
| scl0019191.1     | 143-S | -29.9119 | -1.41 | Psme2b        | NM 011191.1 | Mus musculus protease (prosome, macropain) 28 subunit, beta, b (Psme2b), mRNA.                  |
| scl0014961.2     | 33-S  | -29.5785 | -2.32 | H2-Ab1        | NM 010379.2 | Mus musculus histocompatibility 2, class II antigen A, beta 1 (H2-Ab1), mRNA.                   |
| scl017118.3      | 6-S   | -29.4431 | -1.91 | Marcks        | NM 008538   | Mus musculus myristoylated alanine rich protein kinase C substrate (Marcks), mRNA.              |

|                     |          |       |               |             |                                                                                                                                                                  |
|---------------------|----------|-------|---------------|-------------|------------------------------------------------------------------------------------------------------------------------------------------------------------------|
| scl32713.7.1 59-S   | -29.4263 | -1.51 | 1110007C05Rik | NM 025368.1 | Mus musculus RIKEN cDNA 1110007C05 gene (1110007C05Rik), mRNA.                                                                                                   |
| scl0076933.2 252-S  | -29.1924 | -2.51 | 2310061N23Rik | NM 029803.1 | Mus musculus RIKEN cDNA 2310061N23 gene (2310061N23Rik), mRNA.                                                                                                   |
| scl0012846.1 253-S  | -29.1493 | -1.38 | Comt          | XM 147265.1 | Mus musculus catechol-O-methyltransferase (Comt), mRNA.                                                                                                          |
| scl41542.4 321-S    | -29.1109 | -1.86 | Gm2a          | NM 010299.2 | Mus musculus GM2 ganglioside activator protein (Gm2a), mRNA.                                                                                                     |
| scl0020054.1 111-S  | -29.09   | -1.33 | Rps15         | NM 009091.1 | Mus musculus ribosomal protein S15 (Rps15), mRNA.                                                                                                                |
| scl0003429.1 37-S   | -29.0184 | -1.43 | Hmbs          | NM 013551   | Mus musculus hydroxymethylbilane synthase (Hmbs), mRNA.                                                                                                          |
| scl0114887.6 24-S   | -28.917  | -2.87 | Rmcs1         | NM 207105.1 | Mus musculus response to metastatic cancers 1 (Rmcs1), mRNA.                                                                                                     |
| scl17503.7.1 197-S  | -28.7865 | -2.69 | 1810037B05Rik | XM 129390.2 | Mus musculus RIKEN cDNA 1810037B05 gene (1810037B05Rik), mRNA.                                                                                                   |
| scl39610.3 265-S    | -28.7347 | -2.28 | Ccr7          | NM 007719.1 | Mus musculus chemokine (C-C motif) receptor 7 (Ccr7), mRNA.                                                                                                      |
| scl20330.11.1 76-S  | -28.6342 | -1.37 | Bivra         | NM 026678.3 | Mus musculus biliverdin reductase A (Bivra), mRNA.                                                                                                               |
| scl37022.6.1 3-S    | -28.5439 | -1.55 | Cd3d          | NM 013487.1 | Mus musculus CD3 antigen, delta polypeptide (Cd3d), mRNA.                                                                                                        |
| scl0020846.2 62-S   | -28.4378 | -1.75 | Stat1         | NM 009283.2 | Mus musculus signal transducer and activator of transcription 1 (Stat1), mRNA.                                                                                   |
| scl056367.1 256-S   | -28.4043 | -1.35 | Scoc          | XM 134455.1 | Mus musculus short coiled-coil protein (Scoc), mRNA.                                                                                                             |
| scl15933.11.1 5-S   | -28.3623 | -1.97 | Ly9           | NM 008534.1 | Mus musculus lymphocyte antigen 9 (Ly9), mRNA.                                                                                                                   |
| scl54851.7 89-S     | -28.3337 | -1.76 | Bgn           | NM 007542.3 | Mus musculus biglycan (Bgn), mRNA.                                                                                                                               |
| scl0015446.2 268-S  | -28.1751 | -2.01 | Hpgd          | NM 008278.1 | Mus musculus hydroxyprostaglandin dehydrogenase 15 (NAD) (Hpgd), mRNA.                                                                                           |
| scl066158.1 320-S   | -28.1222 | -1.73 | 1110012O05Rik | NM 024170   | Mus musculus RIKEN cDNA 1110012O05 gene (1110012O05Rik), mRNA.                                                                                                   |
| scl065972.3 20-S    | -28.0439 | -1.75 | Iifi30        | NM 023065.2 | Mus musculus interferon gamma inducible protein 30 (Iifi30), mRNA.                                                                                               |
| scl0056628.1 326-S  | -28.0205 | -2.24 | LOC56628      | NM 019909.1 | Mus musculus MHC (A.CA/J(H-2K-f) class I antigen (LOC56628), mRNA.                                                                                               |
| scl0018854.2 223-S  | -27.9955 | -1.44 | Pml           | NM 008884.2 | Mus musculus promyelocytic leukemia (Pml), mRNA.                                                                                                                 |
| scl45437.13.1 73-S  | -27.9769 | -2.25 | Blk           | NM 007549.2 | Mus musculus B lymphoid kinase (Blk), mRNA.                                                                                                                      |
| scl0022214.2 142-S  | -27.6497 | -1.36 | Ube2h         | XM 133034.1 | Mus musculus ubiquitin-conjugating enzyme E2H (Ube2h), mRNA.                                                                                                     |
| scl45706.11 2-S     | -27.6197 | -1.46 | Ghitm         | NM 078478.1 | Mus musculus growth hormone inducible transmembrane protein (Ghitm), mRNA.                                                                                       |
| scl23946.8.1 41-S   | -27.4451 | -1.27 | Urod          | NM 009478.1 | Mus musculus uroporphyrinogen decarboxylase (Urod), mRNA.                                                                                                        |
| scl022259.1 112-S   | -27.392  | -1.75 | Nr1h3         | NM 013839.1 | Mus musculus nuclear receptor subfamily 1, group H, member 3 (Nr1h3), mRNA.                                                                                      |
| scl0231932.2 146-S  | -27.3811 | -2.64 | Ian3          | NM 146167.2 | Mus musculus immune associated nucleotide 3 (Ian3), mRNA.                                                                                                        |
| scl00231440.1 287-S | -27.38   | -2.21 | 9130213B05Rik | NM 145562.1 | Mus musculus RIKEN cDNA 9130213B05 gene (9130213B05Rik), mRNA.                                                                                                   |
| scl00211586.2 45-S  | -27.1989 | -1.53 | A330080J22Rik | NM 178667.2 | Mus musculus RIKEN cDNA A330080J22 gene (A330080J22Rik), mRNA.                                                                                                   |
| scl00170812.1 267-S | -27.1613 | -1.42 | Eraf          | NM 133245.1 | Mus musculus erythroid associated factor (Eraf), mRNA.                                                                                                           |
| scl0107321.9 13-S   | -27.141  | -1.75 | Lpxn          | NM 134152.1 | Mus musculus leupaxin (Lpxn), mRNA.                                                                                                                              |
| scl32758.9.1 2-S    | -27.138  | -2.66 | Siglec10      | NM 172900.1 | Mus musculus sialic acid binding Ig-like lectin 10 (Siglec10), mRNA.                                                                                             |
| scl53360.9.1 13-S   | -27.0389 | -1.67 | Ms4a6b        | NM 027209.2 | Mus musculus membrane-spanning 4-domains, subfamily A, member 6B (Ms4a6b), mRNA.                                                                                 |
| scl40288.3 192-S    | -27.0012 | -1.73 | Iifi1         | NM 008326.1 | Mus musculus interferon inducible protein 1 (Iifi1), mRNA.                                                                                                       |
| scl51713.6.3 46-S   | -26.8767 | -1.33 | Cyb5          | NM 025797   | Mus musculus cytochrome b-5 (Cyb5), mRNA.                                                                                                                        |
| scl0054613.2 126-S  | -26.8305 | -1.35 | Siat10        | NM 018784.1 | Mus musculus sialyltransferase 10 (alpha-2,3-sialyltransferase VI) (Siat10), mRNA.                                                                               |
| scl019942.4 1-S     | -26.7577 | -1.71 | Rpl27         | NM 011289   | Mus musculus ribosomal protein L27 (Rpl27), mRNA.                                                                                                                |
| scl0067238.2 233-S  | -26.7074 | -1.71 | 2810453I06Rik | NM 026050.1 | Mus musculus RIKEN cDNA 2810453I06 gene (2810453I06Rik), mRNA.                                                                                                   |
| scl19885.7 41-S     | -26.3751 | -1.42 | Zfp313        | NM 030743.3 | Mus musculus zinc finger protein 313 (Zfp313), mRNA.                                                                                                             |
| scl0015040.1 90-S   | -26.3333 | -1.5  | H2-T23        | NM 010398.1 | Mus musculus histocompatibility 2, T region locus 23 (H2-T23), mRNA.                                                                                             |
| scl0078255.2 178-S  | -26.2823 | -1.92 | 4921528G01Rik | NM 023884.2 |                                                                                                                                                                  |
| scl012484.2 55-S    | -26.2312 | -1.37 | Cd24a         | NM 009846.1 | Mus musculus CD24a antigen (Cd24a), mRNA.                                                                                                                        |
| scl32303.22 382-S   | -26.1408 | -1.74 | Fchsd2        | NM 199012.1 | Mus musculus FCH and double SH3 domains 2 (Fchsd2), mRNA.                                                                                                        |
| scl013136.4 3-S     | -26.103  | -1.87 | Daf1          | NM 010016.1 | Mus musculus decay accelerating factor 1 (Daf1), mRNA.                                                                                                           |
| scl25758.6.1 14-S   | -25.9765 | -2.21 | 1200006F02Rik | NM 027872.1 | Mus musculus RIKEN cDNA 1200006F02 gene (1200006F02Rik), mRNA.                                                                                                   |
| scl069046.1 193-S   | -25.9232 | -1.31 | Hblid2        | NM 026921.2 | Mus musculus HESB like domain containing 2 (Hblid2), mRNA.                                                                                                       |
| scl0012192.2 103-S  | -25.9148 | -1.89 | Zfp361i       | NM 007564.2 | Mus musculus zinc finger protein 36, C3H type-like 1 (Zfp361i), mRNA.                                                                                            |
| scl23773.12.1 52-S  | -25.9137 | -2.2  | Lck           | NM 010693.1 | Mus musculus lymphocyte protein tyrosine kinase (Lck), mRNA.                                                                                                     |
| scl0231086.16 205-S | -25.903  | -1.28 | Hadhb         | NM 145558.1 | Mus musculus hydroxyacyl-Coenzyme A dehydrogenase/3-ketoacyl-Coenzyme A thiolase/enoyl-Coenzyme A hydratase (trifunctional protein), beta subunit (Hadhb), mRNA. |
| scl0020947.1 79-S   | -25.7666 | -1.5  | Swap70        | NM 009302.2 | Mus musculus SWAP complex protein (Swap70), mRNA.                                                                                                                |
| scl32504.5.336 28-S | -25.725  | -1.51 | Isq20         | NM 020583.4 | Mus musculus interferon-stimulated protein (Isq20), mRNA.                                                                                                        |
| scl076071.13 258-S  | -25.6565 | -2.38 | Gababrbp      | NM 178394.2 |                                                                                                                                                                  |
| scl0110052.3 51-S   | -25.2779 | -1.28 | Dek           | NM 025900.1 | Mus musculus DEK oncogene (DNA binding) (Dek), mRNA.                                                                                                             |
| scl35429.19.1 59-S  | -25.2566 | -1.4  | 1300017J02Rik | NM 027918.1 | Mus musculus RIKEN cDNA 1300017J02 gene (1300017J02Rik), mRNA.                                                                                                   |
| scl32299.7.1 25-S   | -25.2329 | -1.45 | Stard10       | NM 019990.1 | Mus musculus START domain containing 10 (Stard10), mRNA.                                                                                                         |
| scl068193.4 35-S    | -25.1806 | -1.31 | Rpl24         | NM 024218.2 | Mus musculus ribosomal protein L24 (Rpl24), mRNA.                                                                                                                |
| scl067596.7 211-S   | -25.1446 | -2.44 | 5830405N20Rik | NM 183264.1 | Mus musculus RIKEN cDNA 5830405N20 gene (5830405N20Rik), mRNA.                                                                                                   |

|                        |          |       |               |             |                                                                                                                   |
|------------------------|----------|-------|---------------|-------------|-------------------------------------------------------------------------------------------------------------------|
| scl0011307.2 72-S      | -25.1033 | -1.54 | Abcg1         | NM 009593.1 | Mus musculus ATP-binding cassette, sub-family G (WHITE), member 1 (Abcg1), mRNA.                                  |
| scl43315.9.1 17-S      | -24.9377 | -1.59 | Sh3y1         | NM 013709.2 | Mus musculus Sh3 domain YSC-like 1 (Sh3y1), mRNA.                                                                 |
| scl027556.1 96-S       | -24.8068 | -1.26 | Clic4         | XM 124389.1 | Mus musculus chloride intracellular channel 4 (mitochondrial) (Clic4), mRNA.                                      |
| scl50197.1.198 198-S   | -24.6704 | -1.3  | Fahd1         | NM 023480.1 |                                                                                                                   |
| scl018606.1 11-S       | -24.6452 | -1.83 | Enpp2         | NM 015744   | Mus musculus ectonucleotide pyrophosphatase/phosphodiesterase 2 (Enpp2), mRNA.                                    |
| scl020335.2 33-S       | -24.4364 | -1.41 | Sec61g        | XM 122171.1 | Mus musculus SEC61, gamma subunit (Sec61g), mRNA.                                                                 |
| scl40219.8.1 51-S      | -24.2646 | -1.85 | Pdlim4        | NM 019417.1 | Mus musculus PDZ and LIM domain 4 (Pdlim4), mRNA.                                                                 |
| scl0014128.2 101-S     | -24.24   | -8.5  | Fcer2a        | NM 013517.1 | Mus musculus Fc receptor, IgE, low affinity II, alpha polypeptide (Fcer2a), mRNA.                                 |
| scl21235.24 380-S      | -24.1835 | -2.63 | BC026657      | NM 029895.3 |                                                                                                                   |
| scl052840.5 2-S        | -24.1384 | -1.62 | D2Bwg0891e    | NM 026797.1 | Mus musculus DNA segment, Chr 2, Brigham & Womens Genetics 0891 expressed (D2Bwg0891e), mRNA.                     |
| scl015000.6 157-S      | -24.0775 | -2.18 | H2-DMb2       | NM 010388   | Mus musculus histocompatibility 2, class II, locus Mb2 (H2-DMb2), mRNA.                                           |
| scl45535.5 307-S       | -23.9962 | -1.6  | 1810034K20Rik | NM 023397.3 | Mus musculus RIKEN cDNA 1810034K20 gene (1810034K20Rik), mRNA.                                                    |
| scl46922.6 432-S       | -23.9761 | -2.14 | Tnfrsf13c     | NM 028075.1 | Mus musculus tumor necrosis factor receptor superfamily, member 13c (Tnfrsf13c), mRNA.                            |
| scl023792.26 1-S       | -23.9476 | -2.85 | Adam23        | NM 011780.1 | Mus musculus a disintegrin and metalloprotease domain 23 (Adam23), mRNA.                                          |
| scl0019419.1 154-S     | -23.9203 | -2.5  | Rasgrp1       | NM 011246.2 | Mus musculus RAS guanyl releasing protein 1 (Rasgrp1), mRNA.                                                      |
| scl52114.2 187-S       | -23.8213 | -2.23 | Egr1          | NM 007913.2 | Mus musculus early growth response 1 (Egr1), mRNA.                                                                |
| scl0217151.1 189-S     | -23.6141 | -2.01 | Arl12         | NM 207231.1 |                                                                                                                   |
| scl39161.6.1 317-S     | -23.5671 | -1.67 | D730019B10Rik | NM 172785.1 |                                                                                                                   |
| scl44899.5.1 87-S      | -23.4784 | -1.74 | Ly86          | NM 010745.1 | Mus musculus lymphocyte antigen 86 (Ly86), mRNA.                                                                  |
| scl0002648.1 0-S       | -23.4385 | -1.44 | Mllt3         | NM 027326.2 | Mus musculus myeloid/lymphoid or mixed lineage-leukemia translocation to 3 homolog (Drosophila) (Mllt3), mRNA.    |
| scl41727.3.1 77-S      | -23.3725 | -2.27 | Hbg1          | NM 175000.1 |                                                                                                                   |
| scl013823.22 328-S     | -23.3284 | -1.77 | Epb4.1l3      | NM 013813.1 | Mus musculus erythrocyte protein band 4.1-like 3 (Epb4.1l3), mRNA.                                                |
| scl0093760.1 64-S      | -23.2111 | -1.85 | Arid1a        | NM 033566.1 | Mus musculus AT rich interactive domain 1A (Swi1 like) (Arid1a), mRNA.                                            |
| scl46686.16.1 15-S     | -22.9872 | -1.88 | Itgb7         | NM 013566.1 | Mus musculus integrin beta 7 (Itgb7), mRNA.                                                                       |
| scl45134.2 536-S       | -22.9113 | -2.13 | Gpr18         | NM 182806.1 | Mus musculus G protein-coupled receptor 18 (Gpr18), mRNA.                                                         |
| scl018858.5 31-S       | -22.8706 | -1.86 | Pmp22         | NM 008885.1 | Mus musculus peripheral myelin protein (Pmp22), mRNA.                                                             |
| scl0224703.1 41-S      | -22.7836 | -1.48 | 9530046H09Rik | NM 145486.2 | Mus musculus RIKEN cDNA 9530046H09 gene (9530046H09Rik), mRNA.                                                    |
| IGKV14-126_AJ231238    | -22.7286 | -3.79 | LOC243428     | XM 144778.1 | Mus musculus similar to Ig kappa chain (LOC243428), mRNA.                                                         |
| scl0015051.1 246-S     | -22.5484 | -1.68 | H2-T9         | NM 010399   | Mus musculus histocompatibility 2, T region locus 9 (H2-T9), mRNA.                                                |
| scl0066610.1 317-S     | -22.3412 | -1.83 | Abi3          | NM 025659.1 | Mus musculus ABI gene family, member 3 (Abi3), mRNA.                                                              |
| scl48020.10.1 127-S    | -22.3191 | -2.37 | 2310016A09Rik | NM 181588.2 | Mus musculus RIKEN cDNA 2310016A09 gene (2310016A09Rik), mRNA.                                                    |
| scl0029809.2 171-S     | -22.3088 | -1.47 | Rabgap1l      | NM 013862.3 |                                                                                                                   |
| scl0240168.18 64-S     | -22.2549 | -2.15 | Rasgrp3       | NM 207246.2 | Mus musculus RAS guanyl releasing protein 3 (Rasgrp3), mRNA.                                                      |
| IGLC2_J00595_Ig_lambda | -22.239  | -2.05 |               |             |                                                                                                                   |
| scl25458.10.1 3-S      | -22.1334 | -2.36 | Galnt12       | NM 172693.2 | Mus musculus UDP-N-acetyl-alpha-D-galactosamine:polypeptide N-acetylgalactosaminyltransferase 12 (Galnt12), mRNA. |
| scl014468.10 101-S     | -21.9766 | -2.25 | Gbp1          | NM 010259.1 | Mus musculus guanylate nucleotide binding protein 1 (Gbp1), mRNA.                                                 |
| scl0229499.10 22-S     | -21.7004 | -1.87 | A230020G22Rik | NM 178165.2 | Mus musculus RIKEN cDNA A230020G22 gene (A230020G22Rik), mRNA.                                                    |
| scl37046.4 393-S       | -21.6435 | -2    | Thy1          | NM 009382.2 | Mus musculus thymus cell antigen 1, theta (Thy1), mRNA.                                                           |
| scl36445.9 185-S       | -21.6291 | -1.9  | Scotin        | NM 025858.1 | Mus musculus scotin gene (Scotin), mRNA.                                                                          |
| scl40428.15.1 30-S     | -21.6272 | -1.32 | Vrk2          | NM 027260.1 | Mus musculus vaccinia related kinase 2 (Vrk2), mRNA.                                                              |
| scl45283.8.141 93-S    | -21.576  | -1.94 | 9030625A04Rik | NM 172488.1 | Mus musculus RIKEN cDNA 9030625A04 gene (9030625A04Rik), mRNA.                                                    |
| scl019731.1 197-S      | -21.5759 | -1.8  | Rgl1          | NM 016846.2 | Mus musculus ral guanine nucleotide dissociation stimulator, like 1 (Rgl1), mRNA.                                 |
| scl32592.2.658 11-S    | -21.5571 | -2    | Ndn           | NM 010882.2 | Mus musculus necdin (Ndn), mRNA.                                                                                  |
| scl15925.5 61-S        | -21.5192 | -1.84 | Pea15         | NM 008556.1 | Mus musculus phosphoprotein enriched in astrocytes 15 (Pea15), mRNA.                                              |
| scl022142.1 236-S      | -21.4566 | -1.36 | Tuba1         | NM 011653   | Mus musculus tubulin, alpha 1 (Tuba1), mRNA.                                                                      |
| scl40832.13.1 18-S     | -21.3502 | -1.87 | Myl4          | NM 010858.3 | Mus musculus myosin, light polypeptide 4, alkali; atrial, embryonic (Myl4), mRNA.                                 |
| scl00228769.2 248-S    | -21.3031 | -1.25 | Psmf1         | NM 144889.1 | Mus musculus proteasome (prosome, macropain) inhibitor subunit 1 (Psmf1), mRNA.                                   |
| scl0013829.2 259-S     | -21.298  | -1.28 | Epb4.9        | NM 013514.2 | Mus musculus erythrocyte protein band 4.9 (Epb4.9), mRNA.                                                         |
| scl16013.3.1 175-S     | -21.1917 | -3.3  | Xcl1          | NM 008510.1 | Mus musculus chemokine (C motif) ligand 1 (Xcl1), mRNA.                                                           |
| scl29460.6.1 6-S       | -21.1879 | -2.81 | Klrd1         | NM 010654.1 | Mus musculus killer cell lectin-like receptor, subfamily D, member 1 (Klrd1), mRNA.                               |
| scl31487.7.1 48-S      | -21.1155 | -1.35 | 6030457N17Rik | XM 133378.3 | Mus musculus RIKEN cDNA 6030457N17 gene (6030457N17Rik), mRNA.                                                    |
| scl22076.2 386-S       | -21.089  | -1.33 | Trim59        | NM 025863.2 |                                                                                                                   |
| scl36223.4.1187 49-S   | -21.0659 | -1.29 | 2310067E08Rik | NM 028013.1 | Mus musculus RIKEN cDNA 2310067E08 gene (2310067E08Rik), mRNA.                                                    |
| scl34673.5.1 43-S      | -21.0048 | -1.34 | Bst2          | NM 198095.1 |                                                                                                                   |
| scl015018.6 2-S        | -20.9045 | -2.49 | H2-Q7         | XM 359282.1 | Mus musculus histocompatibility 2, Q region locus 7 (H2-Q7), mRNA.                                                |
| scl016145.5 11-S       | -20.8779 | -1.47 | Igtp          | NM 018738.2 | Mus musculus interferon gamma induced GTPase (Igtp), mRNA.                                                        |

|                     |          |       |               |             |                                                                            |
|---------------------|----------|-------|---------------|-------------|----------------------------------------------------------------------------|
| scl23434.8.1 51-S   | -20.8197 | -1.82 | Mmp23         | NM 011985.1 | Mus musculus matrix metalloproteinase 23 (Mmp23), mRNA.                    |
| scl49439.24 604-S   | -20.8184 | -2.58 | C2ta          | NM 007575.1 | Mus musculus class II transactivator (C2ta), mRNA.                         |
| scl070574.7 30-S    | -20.725  | -4.94 | Cpm           | XM 125830.3 |                                                                            |
| scl19453.6.2634 3-S | -20.6493 | -1.52 | A130092J06Rik | NM 175511.2 | Mus musculus RIKEN cDNA A130092J06 gene (A130092J06Rik), mRNA.             |
| scl012978.19 21-S   | -20.6481 | -1.69 | Csf1r         | NM 007779.1 | Mus musculus colony stimulating factor 1 receptor (Csf1r), mRNA.           |
| scl15839.11.1 64-S  | -20.5368 | -2.29 | Ephx1         | NM 010145.2 | Mus musculus epoxide hydrolase 1, microsomal (Ephx1), mRNA.                |
| scl16373.17.1 56-S  | -20.472  | -1.9  | Marco         | NM 010766.1 | Mus musculus macrophage receptor with collagenous structure (Marco), mRNA. |
| scl38058.2.1 88-S   | -20.454  | -2.4  | A630077B13Rik | NM 175449.3 | Mus musculus RIKEN cDNA A630077B13 gene (A630077B13Rik), mRNA.             |
| scl22910.4.1 66-S   | -20.4438 | -1.36 | S100a10       | NM 009112.1 | Mus musculus S100 calcium binding protein A10 (calpactin) (S100a10), mRNA. |
| scl0110557.2 204-S  | -20.4362 | -2.22 | H2-Q6         | NM 207648   | Mus musculus histocompatibility 2, Q region locus 6 (H2-Q6), mRNA.         |
| scl0015950.1 6-S    | -20.4302 | -2.03 | Ifi203        | NM 008328.1 | Mus musculus interferon activated gene 203 (Ifi203), mRNA.                 |
| scl28312.12.1 12-S  | -20.4035 | -1.32 | Csda          | NM 139117.1 | Mus musculus cold shock domain protein A (Csda), mRNA.                     |
| scl39820.3.1 53-S   | -20.3651 | -3.25 | Ccl5          | NM 013653.1 | Mus musculus chemokine (C-C motif) ligand 5 (Ccl5), mRNA.                  |
| scl00229622.1 168-S | -20.3117 | -1.81 | 9430063L05Rik | NM 178080.3 | Mus musculus RIKEN cDNA 9430063L05 gene (9430063L05Rik), mRNA.             |
| scl0216792.1 314-S  | -20.2032 | -1.33 | A230051G13Rik | NM 173785.2 |                                                                            |
| scl35577.16.1 50-S  | -20.1813 | -1.38 | Fbxo9         | NM 023605.1 | Mus musculus f-box only protein 9 (Fbxo9), mRNA.                           |
| scl000996.1 9-S     | -20.1553 | -4.03 | 4921528G01Rik | NM 023884.2 | Mus musculus RIKEN cDNA 4921528G01 gene (4921528G01Rik), mRNA.             |
| scl53380.11 494-S   | -20.1172 | -1.24 | Fads1         | NM 146094.1 | Mus musculus fatty acid desaturase 1 (Fads1), mRNA.                        |
| scl32195.13 319-S   | -20.1025 | -2.02 | Swap70        | NM 009302.2 | Mus musculus SWAP complex protein (Swap70), mRNA.                          |
| scl19404.11 191-S   | -20.0892 | -2.85 | Traf1         | NM 009421.2 | Mus musculus Tnf receptor-associated factor 1 (Traf1), mRNA.               |
| scl0027371.2 277-S  | -20.0407 | -2.13 | Sh2d2a        | NM 021309.1 | Mus musculus SH2 domain protein 2A (Sh2d2a), mRNA.                         |



| TABLE A10                                                            |                                                                     |                |                 |                 |                 |                 |                 |                  |                  |
|----------------------------------------------------------------------|---------------------------------------------------------------------|----------------|-----------------|-----------------|-----------------|-----------------|-----------------|------------------|------------------|
| GENMAPPS AND GENE ONTOLOGIES SIGNIFICANTLY CHANGED BY OPP IN SPLEENS |                                                                     |                |                 |                 |                 |                 |                 |                  |                  |
| UP-REGULATED - GENMAPP                                               |                                                                     |                |                 |                 |                 |                 |                 |                  |                  |
| No.                                                                  | MAPP Name                                                           | Number Changed | Number Measured | Number on MAPP  | Percent Changed | Percent Present | Z Score         | Permuted P Value |                  |
| 1                                                                    | Mm_Glycolysis_Gluconeogenesis                                       | 9              | 42              | 61              | 21.4286         | 68.8525         | 6.7300          | 0.0000           |                  |
| 2                                                                    | Mm_Glycolysis_and_Gluconeogenesis                                   | 9              | 42              | 42              | 21.4286         | 100.0000        | 6.7300          | 0.0000           |                  |
| 3                                                                    | Mm_Carbon_fixation                                                  | 5              | 16              | 29              | 31.2500         | 55.1724         | 6.3740          | 0.0000           |                  |
| 4                                                                    | Mm_Pentose_phosphate_pathway                                        | 6              | 24              | 47              | 25.0000         | 51.0638         | 6.0720          | 0.0000           |                  |
| 5                                                                    | Mm_Prostaglandin_synthesis_regulation                               | 5              | 31              | 31              | 16.1290         | 100.0000        | 4.0950          | 0.0030           |                  |
| UP-REGULATED - GENE ONTOLOGY                                         |                                                                     |                |                 |                 |                 |                 |                 |                  |                  |
| No.                                                                  | GO Name                                                             | GO Type        | Number Changed  | Number Measured | Number in GO    | Percent Changed | Percent Present | Z Score          | Permuted P Value |
| 1                                                                    | glycolysis                                                          | P              | 13              | 48              | 78              | 27.0833         | 61.5385         | 12.8650          | 0.0000           |
| 2                                                                    | glucose metabolism                                                  | P              | 17              | 100             | 135             | 17.0000         | 74.0741         | 11.1590          | 0.0000           |
| 3                                                                    | flotillin complex                                                   | C              | 2               | 2               | 2               | 100.0000        | 100.0000        | 10.2090          | 0.0000           |
| 4                                                                    | phosphatidylinositol-4',5-bisphosphate 3-kinase activity            | F              | 2               | 3               | 3               | 66.6667         | 100.0000        | 8.2560           | 0.0000           |
| 5                                                                    | phospholipase inhibitor activity                                    | F              | 3               | 8               | 9               | 37.5000         | 88.8889         | 7.4130           | 0.0000           |
| 6                                                                    | Arp2/3 protein complex                                              | C              | 3               | 8               | 8               | 37.5000         | 100.0000        | 7.4130           | 0.0000           |
| 7                                                                    | pentose-phosphate shunt                                             | P              | 3               | 8               | 10              | 37.5000         | 80.0000         | 7.4130           | 0.0000           |
| 8                                                                    | aldehyde dehydrogenase [NAD(P)+] activity                           | F              | 2               | 4               | 5               | 50.0000         | 80.0000         | 7.0810           | 0.0000           |
| 9                                                                    | actin binding                                                       | F              | 17              | 207             | 230             | 8.2126          | 90.0000         | 6.7470           | 0.0000           |
| 10                                                                   | carbohydrate metabolism                                             | P              | 26              | 442             | 506             | 5.8824          | 87.3518         | 6.2800           | 0.0000           |
| 11                                                                   | response to biotic stimulus                                         | P              | 41              | 879             | 969             | 4.6644          | 90.7121         | 6.2550           | 0.0000           |
| 12                                                                   | gluconeogenesis                                                     | P              | 4               | 20              | 20              | 20.0000         | 100.0000        | 5.9640           | 0.0000           |
| 13                                                                   | response to pest\, pathogen or parasite                             | P              | 27              | 502             | 553             | 5.3785          | 90.7776         | 5.8620           | 0.0000           |
| 14                                                                   | glutathione metabolism                                              | P              | 3               | 15              | 17              | 20.0000         | 88.2353         | 5.1650           | 0.0000           |
| 15                                                                   | immune response                                                     | P              | 32              | 731             | 793             | 4.3776          | 92.1816         | 5.0890           | 0.0000           |
| 16                                                                   | response to stress                                                  | P              | 39              | 1014            | 1107            | 3.8462          | 91.5989         | 4.7650           | 0.0000           |
| 17                                                                   | actin cytoskeleton                                                  | C              | 13              | 206             | 229             | 6.3107          | 89.9563         | 4.7080           | 0.0000           |
| 18                                                                   | defense response                                                    | P              | 33              | 828             | 915             | 3.9855          | 90.4918         | 4.5810           | 0.0000           |
| 19                                                                   | response to stimulus                                                | P              | 65              | 2074            | 2329            | 3.1340          | 89.0511         | 4.5210           | 0.0000           |
| 20                                                                   | cytoskeleton                                                        | C              | 28              | 743             | 859             | 3.7685          | 86.4959         | 3.8800           | 0.0000           |
| 21                                                                   | catalytic activity                                                  | F              | 117             | 4696            | 5420            | 2.4915          | 86.6421         | 3.7140           | 0.0000           |
| 22                                                                   | oxidoreductase activity                                             | F              | 25              | 663             | 775             | 3.7707          | 85.5484         | 3.6590           | 0.0000           |
| 23                                                                   | glyceraldehyde-3-phosphate dehydrogenase (phosphorylating) act.     | F              | 3               | 6               | 26              | 50.0000         | 23.0769         | 8.6720           | 0.0010           |
| 24                                                                   | blood coagulation                                                   | P              | 6               | 73              | 74              | 8.2192          | 98.6487         | 3.9920           | 0.0010           |
| 25                                                                   | inflammatory response                                               | P              | 12              | 217             | 230             | 5.5300          | 94.3478         | 3.9810           | 0.0010           |
| 26                                                                   | chemotaxis                                                          | P              | 8               | 117             | 124             | 6.8376          | 94.3548         | 3.9580           | 0.0010           |
| 27                                                                   | cytoplasm                                                           | C              | 87              | 3488            | 3969            | 2.4943          | 87.8811         | 3.0390           | 0.0010           |
| 28                                                                   | actin filament polymerization                                       | P              | 4               | 25              | 27              | 16.0000         | 92.5926         | 5.1970           | 0.0020           |
| 29                                                                   | phospholipase A2 inhibitor activity                                 | F              | 2               | 3               | 3               | 66.6667         | 100.0000        | 8.2560           | 0.0030           |
| 30                                                                   | epoxide hydrolase activity                                          | F              | 2               | 6               | 6               | 33.3333         | 100.0000        | 5.6680           | 0.0030           |
| 31                                                                   | acute-phase response                                                | P              | 4               | 23              | 26              | 17.3913         | 88.4615         | 5.4760           | 0.0030           |
| 32                                                                   | hematopoietin/interferon-class (D200-domain) cytokine receptor act. | F              | 5               | 58              | 60              | 8.6207          | 96.6667         | 3.7820           | 0.0040           |
| 33                                                                   | cytoskeleton organization and biogenesis                            | P              | 17              | 386             | 431             | 4.4041          | 89.5592         | 3.6920           | 0.0040           |
| 34                                                                   | collagen catabolism                                                 | P              | 3               | 16              | 17              | 18.7500         | 94.1177         | 4.9660           | 0.0050           |
| 35                                                                   | cell proliferation                                                  | P              | 22              | 611             | 648             | 3.6007          | 94.2901         | 3.1900           | 0.0050           |
| 36                                                                   | actin cytoskeleton organization and biogenesis                      | P              | 9               | 163             | 171             | 5.5215          | 95.3216         | 3.4360           | 0.0060           |
| 37                                                                   | kinase activity                                                     | F              | 25              | 788             | 887             | 3.1726          | 88.8388         | 2.7370           | 0.0060           |
| 38                                                                   | pepsin A activity                                                   | F              | 2               | 7               | 9               | 28.5714         | 77.7778         | 5.1960           | 0.0070           |
| 39                                                                   | lysosomal membrane                                                  | C              | 2               | 9               | 10              | 22.2222         | 90.0000         | 4.4900           | 0.0070           |
| 40                                                                   | glutathione transferase activity                                    | F              | 3               | 21              | 26              | 14.2857         | 80.7692         | 4.1840           | 0.0090           |
| 41                                                                   | peptidoglycan metabolism                                            | P              | 3               | 25              | 26              | 12.0000         | 96.1539         | 3.7240           | 0.0090           |
| 42                                                                   | transferase activity                                                | F              | 43              | 1561            | 1757            | 2.7546          | 88.8446         | 2.6790           | 0.0090           |
| DOWN-REGULATED - GENMAPP                                             |                                                                     |                |                 |                 |                 |                 |                 |                  |                  |
| No.                                                                  | MAPP Name                                                           | Number Changed | Number Measured | Number on MAPP  | Percent Changed | Percent Present | Z Score         | Permuted P Value |                  |
| 1                                                                    | Mm_Heme_Biosynthesis                                                | 3              | 9               | 9               | 33.3333         | 100.0000        | 7.1190          | 0.0000           |                  |
| 2                                                                    | Mm_2-Tissues-Blood_and_Lymph                                        | 5              | 34              | 40              | 14.7059         | 85.0000         | 5.6790          | 0.0000           |                  |
| 3                                                                    | Mm_B_Cell_Receptor_NetPath_12                                       | 10             | 147             | 150             | 6.8027          | 98.0000         | 4.6380          | 0.0000           |                  |
| 4                                                                    | Mm_Porphyrin_and_chlorophyll_metabolism                             | 3              | 15              | 58              | 20.0000         | 25.8621         | 5.3080          | 0.0010           |                  |
| 5                                                                    | Mm_T-Cell-Receptor_NetPath_11                                       | 7              | 124             | 126             | 5.6452          | 98.4127         | 3.2650          | 0.0080           |                  |
| DOWN-REGULATED - GENE ONTOLOGY                                       |                                                                     |                |                 |                 |                 |                 |                 |                  |                  |
| No.                                                                  | GO Name                                                             | GO Type        | Number Changed  | Number Measured | Number in GO    | Percent Changed | Percent Present | Z Score          | Permuted P Value |
| 1                                                                    | antigen presentation\, exogenous peptide antigen                    | P              | 5               | 5               | 6               | 100.0000        | 83.3333         | 18.4830          | 0.0000           |
| 2                                                                    | antigen processing\, exogenous antigen via MHC class II             | P              | 6               | 9               | 13              | 66.6667         | 69.2308         | 16.4130          | 0.0000           |
| 3                                                                    | antigen presentation\, exogenous antigen via MHC class II           | P              | 6               | 10              | 12              | 60.0000         | 83.3333         | 15.5330          | 0.0000           |
| 4                                                                    | MHC class II receptor activity                                      | F              | 5               | 7               | 11              | 71.4286         | 63.6364         | 15.5300          | 0.0000           |
| 5                                                                    | external side of plasma membrane                                    | C              | 15              | 76              | 80              | 19.7368         | 95.0000         | 13.4080          | 0.0000           |
| 6                                                                    | defense response                                                    | P              | 56              | 828             | 915             | 6.7633          | 90.4918         | 13.2130          | 0.0000           |
| 7                                                                    | immune response                                                     | P              | 51              | 731             | 793             | 6.9767          | 92.1816         | 12.8690          | 0.0000           |
| 8                                                                    | multivesicular body                                                 | C              | 4               | 7               | 10              | 57.1429         | 70.0000         | 12.3600          | 0.0000           |
| 9                                                                    | antigen presentation                                                | P              | 11              | 52              | 63              | 21.1539         | 82.5397         | 11.9400          | 0.0000           |
| 10                                                                   | antigen presentation\, exogenous antigen                            | P              | 6               | 17              | 21              | 35.2941         | 80.9524         | 11.7100          | 0.0000           |
| 11                                                                   | biliverdin reductase activity                                       | F              | 2               | 2               | 2               | 100.0000        | 100.0000        | 11.6880          | 0.0000           |
| 12                                                                   | MHC class II protein complex                                        | C              | 2               | 2               | 2               | 100.0000        | 100.0000        | 11.6880          | 0.0000           |
| 13                                                                   | antigen presentation\, endogenous antigen                           | P              | 6               | 22              | 25              | 27.2727         | 88.0000         | 10.1670          | 0.0000           |
| 14                                                                   | cell surface                                                        | C              | 17              | 157             | 164             | 10.8280         | 95.7317         | 9.9140           | 0.0000           |

|    |                                                         |   |    |      |      |         |          |        |        |
|----|---------------------------------------------------------|---|----|------|------|---------|----------|--------|--------|
| 15 | humoral immune response                                 | P | 15 | 134  | 142  | 11.1940 | 94.3662  | 9.5080 | 0.0000 |
| 16 | positive regulation of T cell activation                | P | 8  | 45   | 45   | 17.7778 | 100.0000 | 9.2030 | 0.0000 |
| 17 | T cell activation                                       | P | 12 | 95   | 101  | 12.6316 | 94.0594  | 9.1740 | 0.0000 |
| 18 | antigen processing\, endogenous antigen via MHC class I | P | 5  | 20   | 23   | 25.0000 | 86.9565  | 8.8400 | 0.0000 |
| 19 | response to stimulus                                    | P | 74 | 2074 | 2329 | 3.5680  | 89.0511  | 8.7540 | 0.0000 |
| 20 | MHC class I protein complex                             | C | 5  | 25   | 32   | 20.0000 | 78.1250  | 7.7870 | 0.0000 |
| 21 | T cell differentiation                                  | P | 6  | 38   | 41   | 15.7895 | 92.6829  | 7.4250 | 0.0000 |
| 22 | MHC class I receptor activity                           | F | 5  | 28   | 35   | 17.8571 | 80.0000  | 7.2900 | 0.0000 |
| 23 | detection of pest\, pathogen or parasite                | P | 2  | 5    | 5    | 40.0000 | 100.0000 | 7.2310 | 0.0000 |
| 24 | cellular defense response                               | P | 9  | 101  | 103  | 8.9109  | 98.0583  | 6.3150 | 0.0000 |
| 25 | positive regulation of immune response                  | P | 8  | 91   | 95   | 8.7912  | 95.7895  | 5.8960 | 0.0000 |
| 26 | plasma membrane                                         | C | 48 | 1634 | 1760 | 2.9376  | 92.8409  | 5.3720 | 0.0000 |
| 27 | hemopoiesis                                             | P | 10 | 182  | 201  | 5.4945  | 90.5473  | 4.6120 | 0.0000 |
| 28 | protein binding                                         | F | 94 | 4725 | 5185 | 1.9894  | 91.1283  | 3.8200 | 0.0000 |
| 29 | cytoplasm                                               | C | 70 | 3488 | 3969 | 2.0069  | 87.8811  | 3.1960 | 0.0000 |
| 30 | positive regulation of T cell differentiation           | P | 4  | 17   | 17   | 23.5294 | 100.0000 | 7.6410 | 0.0010 |
| 31 | heme biosynthesis                                       | P | 3  | 11   | 11   | 27.2727 | 100.0000 | 7.1860 | 0.0010 |
| 32 | integrin binding                                        | F | 5  | 32   | 34   | 15.6250 | 94.1177  | 6.7350 | 0.0010 |
| 33 | sialyltransferase activity                              | F | 3  | 18   | 19   | 16.6667 | 94.7368  | 5.4190 | 0.0010 |
| 34 | antigen binding                                         | F | 4  | 34   | 63   | 11.7647 | 53.9683  | 5.0530 | 0.0010 |
| 35 | humoral defense mechanism (sensu Vertebrata)            | P | 7  | 93   | 101  | 7.5269  | 92.0792  | 4.9350 | 0.0010 |
| 36 | chemokine activity                                      | F | 4  | 37   | 43   | 10.8108 | 86.0465  | 4.7840 | 0.0010 |
| 37 | copper ion binding                                      | F | 5  | 57   | 64   | 8.7719  | 89.0625  | 4.6490 | 0.0010 |
| 38 | positive thymic T cell selection                        | P | 3  | 7    | 7    | 42.8571 | 100.0000 | 9.1900 | 0.0020 |
| 39 | B cell receptor complex                                 | C | 2  | 4    | 4    | 50.0000 | 100.0000 | 8.1450 | 0.0020 |
| 40 | chaperone cofactor dependent protein folding            | P | 2  | 9    | 10   | 22.2222 | 90.0000  | 5.2290 | 0.0020 |
| 41 | lysosome                                                | C | 7  | 123  | 129  | 5.6911  | 95.3488  | 3.9670 | 0.0020 |
| 42 | apoptosis                                               | P | 18 | 573  | 617  | 3.1414  | 92.8687  | 3.4770 | 0.0030 |
| 43 | calcium ion homeostasis                                 | P | 5  | 82   | 84   | 6.0976  | 97.6191  | 3.5440 | 0.0050 |
| 44 | B cell receptor signaling pathway                       | P | 2  | 7    | 7    | 28.5714 | 100.0000 | 6.0200 | 0.0060 |
| 45 | regulation of apoptosis                                 | P | 14 | 403  | 431  | 3.4739  | 93.5035  | 3.4670 | 0.0060 |
| 46 | sugar binding                                           | F | 7  | 173  | 187  | 4.0462  | 92.5134  | 2.8880 | 0.0060 |
| 47 | cell proliferation                                      | P | 17 | 611  | 648  | 2.7823  | 94.2901  | 2.8360 | 0.0060 |
| 48 | Ras guanyl-nucleotide exchange factor activity          | F | 2  | 9    | 9    | 22.2222 | 100.0000 | 5.2290 | 0.0070 |
| 49 | protein-lysine 6-oxidase activity                       | F | 2  | 10   | 11   | 20.0000 | 90.9091  | 4.9220 | 0.0070 |
| 50 | integral to Golgi membrane                              | C | 3  | 30   | 32   | 10.0000 | 93.7500  | 3.9340 | 0.0080 |
| 51 | endonuclease activity                                   | F | 5  | 80   | 121  | 6.2500  | 66.1157  | 3.6150 | 0.0080 |
| 52 | lipid raft                                              | C | 3  | 27   | 29   | 11.1111 | 93.1035  | 4.2160 | 0.0090 |

TABLE A11

| GENES UP-REGULATED BY OPP IN HEARTS |            |             |               |             |                                                                                                             |
|-------------------------------------|------------|-------------|---------------|-------------|-------------------------------------------------------------------------------------------------------------|
| TargetID                            | Diff_Score | Fold_Change | Symbol        | Accession   | Definition                                                                                                  |
| scl48649.5.1 0-S                    | 34.9301    | 1.4         | 5730578N08Rik | XM 148395.1 | Mus musculus RIKEN cDNA 5730578N08 gene (5730578N08Rik), mRNA.                                              |
| scl0380791.1 239-S                  | 32.7668    | 2.55        | Igh-VJ558     | XM 354700   |                                                                                                             |
| scl0003638.1 65-S                   | 32.7229    | 1.45        | 2310016C16Rik | NM 027127.1 | Mus musculus RIKEN cDNA 2310016C16 gene (2310016C16Rik), mRNA.                                              |
| scl019989.6 6-S                     | 32.2873    | 1.23        | Rpl7          | NM 011291   | Mus musculus ribosomal protein L7 (Rpl7), mRNA.                                                             |
| scl34621.8 577-S                    | 31.8495    | 1.29        | Ednra         | NM 010332.1 | Mus musculus endothelin receptor type A (Ednra), mRNA.                                                      |
| scl41548.2.100 36-S                 | 29.3828    | 1.21        | Hint1         | NM 008248.1 | Mus musculus histidine triad nucleotide binding protein 1 (Hint1), mRNA.                                    |
| scl24151.12.434 2-S                 | 29.1369    | 1.36        | Adfp          | NM 007408.2 | Mus musculus adipose differentiation related protein (Adfp), mRNA.                                          |
| scl066576.4 1-S                     | 28.9736    | 1.2         | Uqcrh         | NM 025641.2 |                                                                                                             |
| scl41049.3 319-S                    | 27.8967    | 1.66        | 1810057C19Rik | NM 026433.1 | Mus musculus RIKEN cDNA 1810057C19 gene (1810057C19Rik), mRNA.                                              |
| scl50814.22.1 1-S                   | 27.1031    | 1.33        | Creb1         | NM 017406.2 | Mus musculus cAMP responsive element binding protein-like 1 (Creb1), mRNA.                                  |
| scl28291.1 56-S                     | 26.9646    | 1.24        | Tctex1        | NM 009342   | Mus musculus t-complex testis expressed 1 (Tctex1), mRNA.                                                   |
| scl47818.1 22-S                     | 23.1615    | 1.4         | Gpihbp1       | XM 128001.2 |                                                                                                             |
| scl0229543.1 170-S                  | 23.1057    | 1.49        | C77668        | NM 145540.2 | Mus musculus expressed sequence C77668 (C77668), transcript variant 1, mRNA.                                |
| scl0330941.1 271-S                  | 23.0508    | 1.67        | Ai593442      | NM 177907.2 | Mus musculus expressed sequence Ai593442 (Ai593442), mRNA.                                                  |
| scl018139.26 3-S                    | 22.9847    | 1.27        | Zfml          | NM 008717.1 |                                                                                                             |
| scl51416.9 257-S                    | 21.7381    | 1.85        | Lox           | NM 010728.1 | Mus musculus lysyl oxidase (Lox), mRNA.                                                                     |
| scl096875.3 23-S                    | 21.7114    | 2.63        | Prg4          | XM 355243.1 |                                                                                                             |
| scl23237.22 584-S                   | 21.1741    | 1.35        | 3110057O12Rik | NM 026622.1 | Mus musculus RIKEN cDNA 3110057O12 gene (3110057O12Rik), mRNA.                                              |
| scl0002332.1 7-S                    | 20.5382    | 1.17        | Dld           | NM 007861   | Mus musculus dihydrolipoamide dehydrogenase (Dld), mRNA.                                                    |
| scl47073.5.231 36-S                 | 19.9005    | 1.41        | Ly6c          | NM 010741   | Mus musculus lymphocyte antigen 6 complex, locus C (Ly6c), mRNA.                                            |
| scl54930.9.1 1-S                    | 19.6182    | 1.2         | Hprt          | NM 013556   |                                                                                                             |
| scl33493.3.1 90-S                   | 19.424     | 2.26        | Mt2           | NM 008630.1 | Mus musculus metallothionein 2 (Mt2), mRNA.                                                                 |
| scl067267.4 0-S                     | 19.2236    | 1.16        | 2900010M23Rik | NM 026063.1 | Mus musculus RIKEN cDNA 2900010M23 gene (2900010M23Rik), mRNA.                                              |
| scl020393.12 71-S                   | 18.9391    | 1.35        | Sgk           | NM 011361.1 | Mus musculus serum/glucocorticoid regulated kinase (Sgk), mRNA.                                             |
| scl0319186.1 75-S                   | 18.1757    | 1.23        | Hist1h2bm     | NM 178200   | Mus musculus histone 1, H2bm (Hist1h2bm), mRNA.                                                             |
| scl44868.8 25-S                     | 18.1666    | 1.38        | Gcnt2         | NM 008105.2 | Mus musculus glucosaminyl (N-acetyl) transferase 2, l-branching enzyme (Gcnt2), transcript variant 3, mRNA. |
| scl20807.21.1 18-S                  | 18.0519    | 1.26        | Dncic2        | NM 010064   | Mus musculus dynein, cytoplasmic, intermediate chain 2 (Dncic2), mRNA.                                      |
| scl50283.7.5 2-S                    | 18.0507    | 1.24        | Psmb1         | NM 011185   | Mus musculus proteasome (prosome, macropain) subunit, beta type 1 (Psmb1), mRNA.                            |
| scl0016061.1 157-S                  | 17.9757    | 2.58        | Igh-VJ558     | XM 354700   |                                                                                                             |
| scl0234734.18 28-S                  | 17.7371    | 1.29        | Aars          | NM 146217.3 | Mus musculus alanyl-tRNA synthetase (Aars), mRNA.                                                           |
| scl0004083.1 182-S                  | 17.7268    | 1.31        | Cdv1          | NM 009879.2 | Mus musculus carnitine deficiency-associated gene expressed in ventricle 1 (Cdv1), mRNA.                    |
| scl36472.2.242 20-S                 | 17.5393    | 1.24        | Gpx1          | NM 008160.1 | Mus musculus glutathione peroxidase 1 (Gpx1), mRNA.                                                         |
| scl53358.2.1 26-S                   | 17.5118    | 1.6         | Ms4a6c        | NM 028595   | Mus musculus membrane-spanning 4-domains, subfamily A, member 6C (Ms4a6c), mRNA.                            |
| scl0319160.1 25-S                   | 17.4277    | 1.31        | Hist1h4k      | NM 178211.1 | Mus musculus histone 1, H4k (Hist1h4k), mRNA.                                                               |
| scl15961.15.1 3-S                   | 17.3311    | 1.5         | Uap1          | NM 133806.2 | Mus musculus UDP-N-acetylglucosamine pyrophosphorylase 1 (Uap1), mRNA.                                      |
| scl49164.12 81-S                    | 17.2831    | 1.72        | Fstl1         | NM 008047.2 | Mus musculus follistatin-like 1 (Fstl1), mRNA.                                                              |
| scl36315.5 684-S                    | 17.2196    | 2.34        | Ccbp2         | NM 021609.2 | Mus musculus chemokine binding protein 2 (Ccbp2), mRNA.                                                     |
| scl0230514.5 86-S                   | 16.9687    | 1.25        | Obrgrp        | NM 175036   | Mus musculus leptin receptor gene-related protein (Obrgrp), mRNA.                                           |
| scl29411.4.6 15-S                   | 16.9569    | 1.71        | Mgst1         | NM 019946.3 | Mus musculus microsomal glutathione S-transferase 1 (Mgst1), mRNA.                                          |
| scl0319185.1 5-S                    | 16.8637    | 1.26        | Hist1h2bl     | NM 178199   | Mus musculus histone 1, H2bl (Hist1h2bl), mRNA.                                                             |
| scl0319187.1 0-S                    | 16.6955    | 1.24        | Hist1h2bn     | NM 178201.1 | Mus musculus histone 1, H2bn (Hist1h2bn), mRNA.                                                             |
| scl55015.6.1 13-S                   | 16.6654    | 2.01        | Timp1         | NM 011593   | Mus musculus tissue inhibitor of metalloproteinase 1 (Timp1), mRNA.                                         |
| scl0004022.1 70-S                   | 16.4234    | 1.44        | Arpc1b        | NM 023142.1 | Mus musculus actin related protein 2/3 complex, subunit 1B (Arpc1b), mRNA.                                  |
| scl000253.1 401-S                   | 16.3195    | 1.22        | Ctsc          | NM 009982.2 | Mus musculus cathepsin C (Ctsc), mRNA.                                                                      |
| scl0003537.1 10-S                   | 16.3161    | 2.01        | Pcolce2       | NM 029620.1 | Mus musculus procollagen C-endopeptidase enhancer 2 (Pcolce2), mRNA.                                        |
| scl0002126.1 21-S                   | 16.2872    | 1.41        | 1110001A05Rik | NM 022554.1 | Mus musculus RIKEN cDNA 1110001A05 gene (1110001A05Rik), mRNA.                                              |
| scl024051.1 222-S                   | 16.232     | 1.6         | Sgcb          | NM 011890.2 | Mus musculus sarcoglycan, beta (dystrophin-associated glycoprotein) (Sgcb), mRNA.                           |
| scl066272.3 26-S                    | 15.9703    | 1.24        | 1810020G14Rik | NM 025461.2 | Mus musculus RIKEN cDNA 1810020G14 gene (1810020G14Rik), mRNA.                                              |
| scl0012540.1 20-S                   | 15.9437    | 1.2         | Cdc42         | NM 009861.1 | Mus musculus cell division cycle 42 homolog (S. cerevisiae) (Cdc42), mRNA.                                  |
| scl19390.3.3 3-S                    | 15.7125    | 1.21        | Ndufa8        | NM 026703.1 | Mus musculus NADH dehydrogenase (ubiquinone) 1 alpha subcomplex, 8 (Ndufa8), mRNA.                          |
| scl34564.9 192-S                    | 15.6097    | 1.28        | 4930527D15Rik | NM 026350.1 | Mus musculus RIKEN cDNA 4930527D15 gene (4930527D15Rik), mRNA.                                              |
| scl000941.1 0-S                     | 15.2469    | 1.17        | Ndufs2        | NM 153064.3 | Mus musculus NADH dehydrogenase (ubiquinone) Fe-S protein 2 (Ndufs2), mRNA.                                 |
| scl33301.5.15 0-S                   | 15.0657    | 1.21        | Nudt7         | NM 024437   | Mus musculus nudix (nucleoside diphosphate linked moiety X)-type motif 7 (Nudt7), mRNA.                     |

|                     |         |      |               |             |                                                                                                     |
|---------------------|---------|------|---------------|-------------|-----------------------------------------------------------------------------------------------------|
| scl017110.1 293-S   | 14.9216 | 1.68 | Lzp-s         | NM 013590.2 | Mus musculus P lysozyme structural (Lzp-s), mRNA.                                                   |
| scl43495.3.1 6-S    | 14.9107 | 1.2  | Z310016C16Rik | NM 027127.1 | Mus musculus RIKEN cDNA Z310016C16 gene (Z310016C16Rik), mRNA.                                      |
| scl31620.20 1-S     | 14.8757 | 1.37 | Axl           | NM 009465.2 | Mus musculus AXL receptor tyrosine kinase (Axl), mRNA.                                              |
| scl20107.1 2-S      | 14.638  | 1.22 | ldb1          | NM 010495.1 | Mus musculus inhibitor of DNA binding 1 (ldb1), mRNA.                                               |
| scl43090.8 531-S    | 14.5466 | 1.18 | Rhoj          | NM 023275.1 | Mus musculus ras homolog gene family, member J (Rhoj), mRNA.                                        |
| scl020716.5 261-S   | 14.3786 | 2.35 | Serpina3n     | NM 009252.1 | Mus musculus serine (or cysteine) proteinase inhibitor, clade A, member 3N (Serpina3n), mRNA.       |
| scl021937.10 167-S  | 14.3631 | 1.38 | Tnfrsf1a      | NM 011609.2 | Mus musculus tumor necrosis factor receptor superfamily, member 1a (Tnfrsf1a), mRNA.                |
| scl0019186.1 187-S  | 14.2782 | 1.16 | Psme1         | NM 011189.1 | Mus musculus proteasome (prosome, macropain) 28 subunit, alpha (Psme1), mRNA.                       |
| scl0319180.1 4-S    | 14.21   | 1.32 | Hist1h2bf     | NM 178195.1 | Mus musculus histone 1, H2bf (Hist1h2bf), mRNA.                                                     |
| scl28399.6.24 1-S   | 14.2029 | 1.31 | Cd9           | NM 007657.2 | Mus musculus CD9 antigen (Cd9), mRNA.                                                               |
| scl29544.11 278-S   | 14.0948 | 2.05 | Mfap5         | NM 015776   | Mus musculus microfibrillar associated protein 5 (Mfap5), mRNA.                                     |
| scl49357.1.362 28-S | 13.9738 | 1.39 | Cldn5         | NM 147222.1 | Mus musculus claudin 5 (Cldn5), mRNA.                                                               |
| scl0002748.1 8-S    | 13.9724 | 1.17 | 1110060F11Rik | NM 026395.1 | Mus musculus RIKEN cDNA 1110060F11 gene (1110060F11Rik), mRNA.                                      |
| scl48644.15 23-S    | 13.963  | 1.42 | C330012H03Rik | NM 183029.1 | Mus musculus RIKEN cDNA C330012H03 gene (C330012H03Rik), mRNA.                                      |
| scl00216551.2 0-S   | 13.9194 | 1.3  | 1110067D22Rik | NM 173752.1 | Mus musculus RIKEN cDNA 1110067D22 gene (1110067D22Rik), mRNA.                                      |
| scl54154.5.1 20-S   | 13.6671 | 1.32 | ldh3g         | NM 008323.1 | Mus musculus isocitrate dehydrogenase 3 (NAD+), gamma (ldh3g), mRNA.                                |
| scl28068.2 468-S    | 13.5111 | 1.15 | Fgl2          | NM 008013.2 | Mus musculus fibrinogen-like protein 2 (Fgl2), mRNA.                                                |
| scl24620.16 177-S   | 13.4364 | 1.16 | BC004012      | NM 138671   | Mus musculus cDNA sequence BC004012 (BC004012), mRNA.                                               |
| scl27109.17.1 35-S  | 13.4106 | 1.18 | Plod3         | NM 011962.2 | Mus musculus procollagen-lysine, 2-oxoglutarate 5-dioxygenase 3 (Plod3), mRNA.                      |
| scl34999.9.1 89-S   | 13.3591 | 2.5  | B430206E18Rik | XM 284398.1 |                                                                                                     |
| scl014130.1 14-S    | 13.23   | 1.85 | Fcgr2b        | NM 010187.1 | Mus musculus Fc receptor, IgG, low affinity IIb (Fcgr2b), mRNA.                                     |
| scl43661.2 29-S     | 13.1758 | 1.14 | F2r           | NM 010169.2 | Mus musculus coagulation factor II (thrombin) receptor (F2r), mRNA.                                 |
| scl020719.1 146-S   | 13.1742 | 1.17 | Serpnb6a      | NM 009254.2 | Mus musculus serine (or cysteine) proteinase inhibitor, clade B, member 6a (Serpnb6a), mRNA.        |
| scl00104681.2 288-S | 13.1543 | 1.55 | Slc16a6       | NM 134038.1 | Mus musculus solute carrier family 16 (monocarboxylic acid transporters), member 6 (Slc16a6), mRNA. |
| scl36984.16.1 60-S  | 13.1507 | 1.6  | Zw10          | NM 012039.1 | Mus musculus ZW10 homolog (Drosophila), centromere/kinetochore protein (Zw10), mRNA.                |
| scl23105.14.1 23-S  | 13.0247 | 1.27 | Schip1        | NM 013928.2 | Mus musculus schwannomin interacting protein 1 (Schip1), mRNA.                                      |

**GENES DOWN-REGULATED BY OPP IN HEARTS**

| TargetID            | Diff Score | Fold Change | Symbol        | Accession   | Definition                                                                                 |
|---------------------|------------|-------------|---------------|-------------|--------------------------------------------------------------------------------------------|
| scl0003447.1 0-S    | -36.1303   | -1.83       | Rbm5          | NM 148930.2 | Mus musculus RNA binding motif protein 5 (Rbm5), mRNA.                                     |
| scl19105.6 353-S    | -29.8797   | -1.22       | Ttn           | XM 130312.3 | Mus musculus titin (Ttn), mRNA.                                                            |
| scl34581.9.1 48-S   | -26.6875   | -1.25       | Gpsn2         | NM 134118.1 | Mus musculus glycoprotein, synaptic 2 (Gpsn2), mRNA.                                       |
| scl30345.6 391-S    | -23.3518   | -1.47       | Kcnd2         | XM 132981.1 | Mus musculus potassium voltage-gated channel, Shal-related family, member 2 (Kcnd2), mRNA. |
| scl0076895.2 316-S  | -22.6678   | -1.54       | Bicd2         | NM 029791.2 | Mus musculus bicaudal D homolog 2 (Drosophila) (Bicd2), mRNA.                              |
| scl0020973.1 244-S  | -22.6397   | -1.23       | Syng2         | NM 009304.1 | Mus musculus synaptogyrin 2 (Syng2), mRNA.                                                 |
| scl36105.10.25 13-S | -21.7663   | -1.51       | Tbx20         | NM 194263.1 | Mus musculus T-box 20 (Tbx20), transcript variant 2, mRNA.                                 |
| scl0020455.1 36-S   | -21.581    | -1.21       | Sif1          |             |                                                                                            |
| scl27246.12.1 228-S | -21.5003   | -1.34       | BC035291      | NM 177581.2 | Mus musculus cDNA sequence BC035291 (BC035291), mRNA.                                      |
| scl40597.27.1 84-S  | -21.3587   | -1.33       | Smtn          | NM 013870.1 | Mus musculus smoothelin (Smtn), mRNA.                                                      |
| scl37421.7 120-S    | -20.9459   | -1.27       | Rassf3        | NM 138956   | Mus musculus Ras association (RalGDS/AF-6) domain family 3 (Rassf3), mRNA.                 |
| scl0022070.1 31-S   | -20.3442   | -1.27       | Tpt1          | NM 009429   | Mus musculus tumor protein, translationally-controlled 1 (Tpt1), mRNA.                     |
| scl42532.6 0-S      | -20.1914   | -1.58       | Tm4sf13       | NM 025359.2 | Mus musculus transmembrane 4 superfamily member 13 (Tm4sf13), mRNA.                        |
| scl0017765.2 254-S  | -18.8391   | -1.38       | Mif2          | NM 013827.1 | Mus musculus metal response element binding transcription factor 2 (Mif2), mRNA.           |
| scl54562.12.1 64-S  | -18.6104   | -1.59       | Alas2         | NM 009653.1 | Mus musculus aminolevulinic acid synthase 2, erythroid (Alas2), mRNA.                      |
| scl27262.6 658-S    | -18.5102   | -1.18       | 9130017A15Rik | NM 177242.3 | Mus musculus RIKEN cDNA 9130017A15 gene (9130017A15Rik), mRNA.                             |
| scl0003527.1 242-S  | -17.9742   | -1.3        | Ddx6          | NM 000841.2 | Mus musculus DEAD (Asp-Glu-Ala-Asp) box polypeptide 6 (Ddx6), mRNA.                        |
| scl17563.43 11-S    | -17.6422   | -1.17       | Clasp1        |             | Mus musculus CLIP associating protein 1 (Clasp1), mRNA.                                    |
| scl0319476.2 26-S   | -17.1425   | -1.25       | A930016D02Rik | NM 176920.2 | Mus musculus RIKEN cDNA A930016D02 gene (A930016D02Rik), mRNA.                             |
| scl21522.25 9-S     | -16.9949   | -1.71       | Egf           | NM 010113.1 | Mus musculus epidermal growth factor (Egf), mRNA.                                          |
| scl067371.1 2-S     | -16.6093   | -1.47       | 2410016F19Rik | NM 026113.2 | Mus musculus RIKEN cDNA 2410016F19 gene (2410016F19Rik), mRNA.                             |
| scl0224807.4 25-S   | -16.4982   | -1.56       | BC026370      | NM 198167.1 | Mus musculus cDNA sequence BC026370 (BC026370), mRNA.                                      |
| scl32857.8.1 60-S   | -16.3244   | -1.3        | Lgals4        | NM 010706.1 | Mus musculus lectin, galactose binding, soluble 4 (Lgals4), mRNA.                          |
| scl17047.9.4 6-S    | -16.0154   | -1.33       | BC013667      | NM 172266.1 | Mus musculus cDNA sequence BC013667 (BC013667), mRNA.                                      |
| scl20141.21 29-S    | -15.7759   | -1.16       | Pygb          | NM 153781.1 | Mus musculus brain glycogen phosphorylase (Pygb), mRNA.                                    |
| scl0012725.1 238-S  | -15.6553   | -1.22       | Cicn3         |             |                                                                                            |
| scl26992.46 0-S     | -15.4646   | -1.31       | AI481500      | NM 133901.1 | Mus musculus expressed sequence AI481500 (AI481500), mRNA.                                 |
| scl32353.2.4 40-S   | -15.406    | -1.28       | Ndufc2        | NM 024220.1 |                                                                                            |

|                     |          |       |               |             |                                                                                         |
|---------------------|----------|-------|---------------|-------------|-----------------------------------------------------------------------------------------|
| scl24818.5.937 3-S  | -15.0896 | -1.2  | Zfp46         | NM_009557.1 | Mus musculus zinc finger protein 46 (Zfp46), mRNA.                                      |
| scl48020.10.1 127-S | -15.0502 | -1.2  | Z310016A09Rik | NM_181588.2 | Mus musculus RIKEN cDNA 2310016A09 gene (2310016A09Rik), mRNA.                          |
| scl067956.13 1-S    | -14.9232 | -1.28 | Z410195B05Rik | NM_030241.2 | Mus musculus RIKEN cDNA 2410195B05 gene (2410195B05Rik), mRNA.                          |
| scl0012192.2 103-S  | -14.8896 | -1.72 | Zfp361i       | NM_007564.2 | Mus musculus zinc finger protein 36, C3H type-like 1 (Zfp361i), mRNA.                   |
| scl0001100.1 114-S  | -14.8831 | -1.2  | Aqp1          | NM_007472.1 | Mus musculus aquaporin 1 (Aqp1), mRNA.                                                  |
| scl020382.2 66-S    | -14.8741 | -1.19 | Sfrs2         | NM_011358.1 | Mus musculus splicing factor, arginine/serine-rich 2 (SC-35) (Sfrs2), mRNA.             |
| scl39616.9.169 52-S | -14.8047 | -1.58 | Nr1d1         | NM_145434.1 | Mus musculus nuclear receptor subfamily 1, group D, member 1 (Nr1d1), mRNA.             |
| scl28635.3.1 18-S   | -14.5374 | -1.31 | Lmod3         | XM_149772.3 |                                                                                         |
| scl41201.7.1 21-S   | -14.4234 | -1.67 | Vtn           | NM_011707.1 | Mus musculus vitronectin (Vtn), mRNA.                                                   |
| scl52798.4.1 101-S  | -14.2845 | -1.23 | Nudt8         | NM_025529.2 | Mus musculus nudix (nucleoside diphosphate linked moiety X)-type motif 8 (Nudt8), mRNA. |
| scl50134.9 8-S      | -14.1258 | -1.2  | Nudt3         | NM_019837.1 | Mus musculus nudix (nucleotide diphosphate linked moiety X)-type motif 3 (Nudt3), mRNA. |
| scl22977.3.91 193-S | -14.019  | -1.27 | Dpm3          | XM_130951.1 | Mus musculus dolichyl-phosphate mannosyltransferase polypeptide 3 (Dpm3), mRNA.         |
| scl31603.36.1 19-S  | -13.9861 | -1.3  | Ltbp4         | NM_175641.1 | Mus musculus latent transforming growth factor beta binding protein 4 (Ltbp4), mRNA.    |
| scl34280.9.1 28-S   | -13.979  | -1.24 | Z310061C15Rik | NM_026844.2 |                                                                                         |
| scl24691.6 256-S    | -13.9773 | -1.29 | Catnbip1      | NM_023465.2 | Mus musculus catenin beta interacting protein 1 (Catnbip1), mRNA.                       |
| scl0015516.2 121-S  | -13.908  | -1.29 | Hspcb         | NM_008302.2 | Mus musculus heat shock protein 1, beta (Hspcb), mRNA.                                  |
| scl0104923.5 14-S   | -13.8104 | -1.23 | AL024210      | NM_134052.1 | Mus musculus expressed sequence AL024210 (AL024210), mRNA.                              |
| scl40333.9 365-S    | -13.8014 | -1.34 | Mat2b         | NM_134017.1 | Mus musculus methionine adenosyltransferase II, beta (Mat2b), mRNA.                     |
| scl0121022.3 149-S  | -13.7043 | -1.26 | Mrps6         | NM_080456.1 | Mus musculus mitochondrial ribosomal protein S6 (Mrps6), mRNA.                          |
| scl54266.5 48-S     | -13.5523 | -1.18 | Rap2c         | NM_172413.1 | Mus musculus RAP2C, member of RAS oncogene family (Rap2c), mRNA.                        |
| scl21064.31 2-S     | -13.412  | -1.18 | 5830434P21Rik | NM_172661.2 | Mus musculus RIKEN cDNA 5830434P21 gene (5830434P21Rik), mRNA.                          |
| scl0057259.2 60-S   | -13.2331 | -1.52 | Tob2          | NM_020507.2 | Mus musculus transducer of ERBB2, 2 (Tob2), mRNA.                                       |
| scl0066881.2 144-S  | -13.1102 | -1.24 | Pcyox1        | NM_025823.3 | Mus musculus prenylcysteine oxidase 1 (Pcyox1), mRNA.                                   |
| scl068728.7 0-S     | -13.0323 | -1.14 | Trp53inp2     | NM_178111.2 |                                                                                         |
| scl30455.5 27-S     | -13.0113 | -1.37 | Cdkn1c        | NM_009876.2 | Mus musculus cyclin-dependent kinase inhibitor 1C (P57) (Cdkn1c), mRNA.                 |

| TABLE A12                                                           |                                                          |                |                 |                 |                 |                 |                 |                  |                  |
|---------------------------------------------------------------------|----------------------------------------------------------|----------------|-----------------|-----------------|-----------------|-----------------|-----------------|------------------|------------------|
| GENMAPPS AND GENE ONTOLOGIES SIGNIFICANTLY CHANGED BY OPP IN HEARTS |                                                          |                |                 |                 |                 |                 |                 |                  |                  |
| UP-REGULATED - GENMAPP                                              |                                                          |                |                 |                 |                 |                 |                 |                  |                  |
| No.                                                                 | MAPP Name                                                | Number Changed | Number Measured | Number on MAPP  | Percent Changed | Percent Present | Z Score         | Permuted P Value |                  |
| 1                                                                   | Mm_Citrate_cycle_TCA_cycle_                              | 2              | 14              | 27              | 14.2857         | 51.8519         | 5.5520          | 0.0060           |                  |
| 2                                                                   | Mm_Oxidative_Stress                                      | 2              | 25              | 28              | 8.0000          | 89.2857         | 3.9580          | 0.0140           |                  |
| 3                                                                   | Mm_Krebs-TCA_Cycle                                       | 2              | 29              | 29              | 6.8966          | 100.0000        | 3.6090          | 0.0240           |                  |
| 4                                                                   | Mm_Prostaglandin_synthesis_regulation                    | 2              | 31              | 31              | 6.4516          | 100.0000        | 3.4580          | 0.0370           |                  |
| 5                                                                   | Mm_IL-3_NetPath_15                                       | 3              | 95              | 96              | 3.1579          | 98.9583         | 2.5250          | 0.0430           |                  |
| UP-REGULATED - GENE ONTOLOGY                                        |                                                          |                |                 |                 |                 |                 |                 |                  |                  |
| No.                                                                 | GO Name                                                  | GO Type        | Number Changed  | Number Measured | Number in GO    | Percent Changed | Percent Present | Z Score          | Permuted P Value |
| 1                                                                   | cytolysis                                                | P              | 3               | 19              | 20              | 15.7895         | 95.0000         | 9.5800           | 0.0000           |
| 2                                                                   | glutathione peroxidase activity                          | F              | 2               | 9               | 11              | 22.2222         | 81.8182         | 9.3620           | 0.0000           |
| 3                                                                   | cytoplasm                                                | C              | 29              | 3488            | 3969            | 0.8314          | 87.8811         | 3.3340           | 0.0010           |
| 4                                                                   | NADH dehydrogenase (ubiquinone) activity                 | F              | 2               | 27              | 39              | 7.4074          | 69.2308         | 5.1660           | 0.0020           |
| 5                                                                   | nucleosome assembly                                      | P              | 3               | 66              | 128             | 4.5455          | 51.5625         | 4.7420           | 0.0020           |
| 6                                                                   | nucleosome                                               | C              | 3               | 56              | 115             | 5.3571          | 48.6957         | 5.2400           | 0.0030           |
| 7                                                                   | NADH dehydrogenase activity                              | F              | 2               | 31              | 43              | 6.4516          | 72.0930         | 4.7710           | 0.0040           |
| 8                                                                   | external side of plasma membrane                         | C              | 3               | 76              | 80              | 3.9474          | 95.0000         | 4.3400           | 0.0040           |
| 9                                                                   | oxidoreductase activity                                  | F              | 9               | 663             | 775             | 1.3575          | 85.5484         | 3.2890           | 0.0040           |
| 10                                                                  | extracellular region                                     | C              | 19              | 2219            | 2362            | 0.8562          | 93.9458         | 2.7030           | 0.0050           |
| 11                                                                  | Rho protein signal transduction                          | P              | 3               | 83              | 90              | 3.6145          | 92.2222         | 4.1000           | 0.0060           |
| 12                                                                  | chromosome                                               | C              | 5               | 280             | 364             | 1.7857          | 76.9231         | 3.1480           | 0.0150           |
| 13                                                                  | mitochondrion                                            | C              | 8               | 730             | 822             | 1.0959          | 88.8078         | 2.4190           | 0.0240           |
| 14                                                                  | positive regulation of I-kappaB kinase/NF-kappaB cascade | P              | 2               | 56              | 61              | 3.5714          | 91.8033         | 3.3190           | 0.0290           |
| 15                                                                  | plasma membrane                                          | C              | 14              | 1634            | 1760            | 0.8568          | 92.8409         | 2.2710           | 0.0290           |
| 16                                                                  | extracellular space                                      | C              | 16              | 1967            | 2052            | 0.8134          | 95.8577         | 2.2270           | 0.0310           |
| 17                                                                  | extracellular matrix (sensu Metazoa)                     | C              | 4               | 256             | 273             | 1.5625          | 93.7729         | 2.4900           | 0.0330           |
| 18                                                                  | heparin binding                                          | F              | 2               | 55              | 56              | 3.6364          | 98.2143         | 3.3580           | 0.0350           |
| 19                                                                  | microtubule                                              | C              | 3               | 144             | 166             | 2.0833          | 86.7470         | 2.7620           | 0.0400           |
| DOWN-REGULATED - GENMAPP                                            |                                                          |                |                 |                 |                 |                 |                 |                  |                  |
| No.                                                                 | MAPP Name                                                | Number Changed | Number Measured | Number on MAPP  | Percent Changed | Percent Present | Z Score         | Permuted P Value |                  |
| 1                                                                   | Mm_Id_NetPath_5                                          | 2              | 49              | 50              | 4.0816          | 98.0000         | 5.0940          | 0.0040           |                  |
| 2                                                                   | Mm_Delta-Notch_NetPath_3                                 | 2              | 78              | 80              | 2.5641          | 97.5000         | 3.8770          | 0.0130           |                  |
| 3                                                                   | Mm_Wnt_NetPath_8                                         | 2              | 106             | 109             | 1.8868          | 97.2477         | 3.1910          | 0.0310           |                  |
| DOWN-REGULATED - GENE ONTOLOGY                                      |                                                          |                |                 |                 |                 |                 |                 |                  |                  |
| No.                                                                 | GO Name                                                  | GO Type        | Number Changed  | Number Measured | Number in GO    | Percent Changed | Percent Present | Z Score          | Permuted P Value |
| 1                                                                   | intracellular                                            | C              | 32              | 6943            | 8118            | 0.4609          | 85.5260         | 3.0670           | 0.0040           |
| 2                                                                   | protein binding                                          | F              | 23              | 4725            | 5185            | 0.4868          | 91.1283         | 2.6200           | 0.0050           |
| 3                                                                   | electron transport                                       | P              | 4               | 386             | 461             | 1.0363          | 83.7310         | 2.5880           | 0.0340           |
| 4                                                                   | extracellular matrix (sensu Metazoa)                     | C              | 3               | 256             | 273             | 1.1719          | 93.7729         | 2.4910           | 0.0370           |
| 5                                                                   | cytoplasm                                                | C              | 17              | 3488            | 3969            | 0.4874          | 87.8811         | 2.1310           | 0.0410           |
