# Supplementary material for: Oil palm phenolics attenuate changes caused by an atherogenic diet in mice
Source: Springer Nature journal article supplement (doi:10.1007/s00394-012-0346-0), 2012-04-10
Supplement: MOESM4 [file 8391004]

**Article Title:** Oil palm phenolics attenuate changes caused by an atherogenic diet in mice.

**Journal Name:** European Journal of Nutrition.

**Author Names:** Soon-Sen Leow, Shamala Devi Sekaran, Kalyana Sundram, YewAi Tan, Ravigadevi Sambanthamurthi.

**Corresponding Author:** Ravigadevi Sambanthamurthi; Malaysian Palm Oil Board, No. 6, Persiaran Institusi, Bandar Baru Bangi, 43000 Kajang, Selangor, Malaysia; E-mail: [raviga@mpob.gov.my](mailto:raviga@mpob.gov.my).

#### **Supplementary Material 4**

This file contains three tables which show lists of genes significantly changed by the atherogenic diet and OPP in livers, spleens and hearts of mice. Genes significantly changed by OPP were compared to those significantly changed by the atherogenic diet in terms of the direction of fold changes, with the significance of genes determined via independent comparisons. The first comparison was Atherogenic Diet + Distilled Water versus Normal Diet + Distilled Water, while the second comparison was Atherogenic Diet + OPP : Atherogenic Diet + Distilled Water. A gene was identified as significantly changed in each comparison if its |Differential Score| was more than 20, which was equivalent to a P Value of less than 0.01, with the exception of changes in the heart, in which the stringency criterion was lowered to a |Differential Score| of more than 13, which was equivalent to a P Value of less than 0.05. Positive fold changes indicate up-regulation while negative fold changes indicate down-regulation. Genes coloured red were up-regulated by the atherogenic diet but down-regulated by OPP while genes coloured blue were *vice versa*. Genes coloured black were regulated in the same direction by both factors.

**Table A13** Genes significantly changed by the atherogenic diet and OPP in livers.

**Table A14** Genes significantly changed by the atherogenic diet and OPP in spleens.

**Table A15** Genes significantly changed by the atherogenic diet and OPP in hearts.

TABLE A13

## GENES SIGNIFICANTLY CHANGED BY THE ATHEROGENIC DIET AND OPP IN LIVERS

| TargetID            | Symbol        | Accession   | Definition                                                                                                                  | AD+DW<br>ND+DW | AD+OPP<br>AD+DW | Change |
|---------------------|---------------|-------------|-----------------------------------------------------------------------------------------------------------------------------|----------------|-----------------|--------|
| scl068028.3_20-S    | 3110001N18Rik | NM_026517.1 | Mus musculus RIKEN cDNA 3110001N18 gene (3110001N18Rik), mRNA.                                                              | 104.83         | -1.46           | Y      |
| scl31028.4.1_18-S   | Aqp11         | NM_175105.2 | Mus musculus aquaporin 11 (Aqp11), mRNA.                                                                                    | 101.84         | -2.09           | Y      |
| scl0066881.2_144-S  | Pcyox1        | NM_025823.3 | Mus musculus prenylcysteine oxidase 1 (Pcyox1), mRNA.                                                                       | 82.76          | -1.52           | Y      |
| scl0013809.2_54-S   | Enpep         | NM_007934.1 | Mus musculus glutamyl aminopeptidase (Enpep), mRNA.                                                                         | 62.76          | -1.46           | Y      |
| gi_30794511_ref_NM  | Hmbs          | NM_013551.1 | Mus musculus hydroxymethylbilane synthase (Hmbs), mRNA.                                                                     | 59.11          | -1.41           | Y      |
| scl011958.2_29-S    | Atp5k         | NM_007507   | Mus musculus ATP synthase, H+ transporting, mitochondrial F1F0 complex, subunit e (Atp5k), mRNA.                            | 57.02          | -1.67           | Y      |
| scl0001121.1_1-S    | Ndufa5        | NM_026614.1 | Mus musculus NADH dehydrogenase (ubiquinone) 1 alpha subcomplex, 5 (Ndufa5), mRNA.                                          | 49.87          | -1.37           | Y      |
| scl069786.2_30-S    | 1810034M08Rik | NM_176842.2 | Mus musculus RIKEN cDNA 1810034M08 gene (1810034M08Rik), mRNA.                                                              | 46.35          | -1.90           | Y      |
| scl47189.8.1_128-S  | Mrpl13        | NM_026759.2 | Mus musculus mitochondrial ribosomal protein L13 (Mrpl13), mRNA.                                                            | 38.56          | -1.26           | Y      |
| scl23150.4.1_11-S   | Aadac         | NM_023383.1 | Mus musculus arylacetamide deacetylase (esterase) (Aadac), mRNA.                                                            | 36.53          | -1.59           | Y      |
| scl22246.19.1_4-S   | Mccc1         | NM_023644.2 | Mus musculus methylcrotonoyl-Coenzyme A carboxylase 1 (alpha) (Mccc1), mRNA.                                                | 36.38          | -1.33           | Y      |
| scl093739.4_24-S    | Gabarapl2     | NM_026693.1 | Mus musculus GABA(A) receptor-associated protein like 2 (Gabarapl2), mRNA.                                                  | 32.83          | -1.65           | Y      |
| scl023986.1_240-S   | Peci          | NM_011868.1 | Mus musculus peroxisomal delta3, delta2-enoyl-Coenzyme A isomerase (Peci), mRNA.                                            | 28.54          | -1.60           | Y      |
| scl53954.7_10-S     | Slc16a2       | NM_009197.1 | Mus musculus solute carrier family 16 (monocarboxylic acid transporters), member 2 (Slc16a2), mRNA.                         | 24.11          | -1.54           | Y      |
| scl017449.1_1-S     | Mdh1          | NM_008618.2 | Mus musculus malate dehydrogenase 1, NAD (soluble) (Mdh1), mRNA.                                                            | 23.31          | -1.49           | Y      |
| scl017836.18_18-S   | Mug1          | NM_008645.2 | Mus musculus murinoglobulin 1 (Mug1), mRNA.                                                                                 | 22.36          | -1.87           | Y      |
| scl30665.8.1_14-S   | 1110032O16Rik | XM_133813.4 | Mus musculus RIKEN cDNA 1110032O16 gene (1110032O16Rik), mRNA.                                                              | 15.98          | -1.49           | Y      |
| scl0015129.1_300-S  | Hbb-b1        | NM_008220.2 | Mus musculus hemoglobin, beta adult major chain (Hbb-b1), mRNA.                                                             | 13.43          | -2.21           | Y      |
| scl00353208.1_64-S  | 2810021G02Rik |             |                                                                                                                             | 12.54          | -1.46           | Y      |
| scl0277333.1_280-S  | MGC68323      | NM_199472.1 | Mus musculus similar to glyceraldehyde-3-phosphate dehydrogenase (phosphorylating) (EC 1.2.1.12) - mouse (MGC68323), mRNA.  | 11.27          | -1.59           | Y      |
| scl29306.21.1_2-S   | Slc25a13      | NM_015829.1 | Mus musculus solute carrier family 25 (mitochondrial carrier; adenine nucleotide translocator), member 13 (Slc25a13), mRNA. | 10.32          | -1.24           | Y      |
| scl16633.10.1_180-S | Pecr          | NM_023523.3 | Mus musculus peroxisomal trans-2-enoyl-CoA reductase (Pecr), mRNA.                                                          | 9.87           | -1.36           | Y      |
| scl056043.1_7-S     | Akr1e1        | NM_018859.1 | Mus musculus aldo-keto reductase family 1, member E1 (Akr1e1), mRNA.                                                        | 9.60           | -1.52           | Y      |
| scl0069354.1_68-S   | Slc38a4       | NM_027052.2 | Mus musculus solute carrier family 38, member 4 (Slc38a4), mRNA.                                                            | 9.50           | -1.37           | Y      |
| scl00232449.2_167-S | 2500002K03Rik | NM_172733.1 | Mus musculus RIKEN cDNA 2500002K03 gene (2500002K03Rik), mRNA.                                                              | 8.64           | -1.40           | Y      |
| scl015024.2_236-S   | H2-T10        | NM_010395.2 | Mus musculus histocompatibility 2, T region locus 10 (H2-T10), mRNA.                                                        | 8.47           | -1.50           | Y      |
| scl0245867.4_1-S    | 5330414D10Rik | NM_153594.2 | Mus musculus RIKEN cDNA 5330414D10 gene (5330414D10Rik), mRNA.                                                              | 8.16           | -1.57           | Y      |
| scl27606.14.1_65-S  | Afm           | NM_145146.1 | Mus musculus afamin (Afm), mRNA.                                                                                            | 7.44           | -1.33           | Y      |
| scl29983.21.1_98-S  | Abcg2         | NM_011920.1 | Mus musculus ATP-binding cassette, sub-family G (WHITE), member 2 (Abcg2), mRNA.                                            | 5.51           | -2.43           | Y      |
| scl030931.1_245-S   | Dyt1          | NM_144884.1 | Mus musculus dystonia 1 (Dyt1), mRNA.                                                                                       | 5.46           | -1.29           | Y      |
| scl31053.2.1_38-S   | 1810020E01Rik | NM_025460.1 | Mus musculus RIKEN cDNA 1810020E01 gene (1810020E01Rik), mRNA.                                                              | 5.39           | -1.30           | Y      |
| scl29045.3.1_38-S   | Rarres2       | NM_027852.1 | Mus musculus retinoic acid receptor responder (tazarotene induced) 2 (Rarres2), mRNA.                                       | 4.34           | -1.34           | Y      |
| scl15766.4.1_27-S   | 1110060M21Rik | NM_025424.1 | Mus musculus RIKEN cDNA 1110060M21 gene (1110060M21Rik), mRNA.                                                              | 4.27           | -1.44           | Y      |
| scl46659.10_50-S    | Zfp385        | NM_013866.1 | Mus musculus zinc finger protein 385 (Zfp385), mRNA.                                                                        | 3.69           | -1.27           | Y      |
| scl000022.1_12-S    | Cpt2          | NM_009949   | Mus musculus carnitine palmitoyltransferase 2 (Cpt2), mRNA.                                                                 | 3.50           | -1.28           | Y      |
| scl076654.7_194-S   | Upp2          | NM_029692.1 | Mus musculus uridine phosphorylase 2 (Upp2), mRNA.                                                                          | 3.24           | -1.40           | Y      |
| scl0017993.1_168-S  | Ndufs4        | NM_010887.1 | Mus musculus NADH dehydrogenase (ubiquinone) Fe-S protein 4 (Ndufs4), mRNA.                                                 | 2.98           | -1.23           | Y      |
| scl0015040.1_90-S   | H2-T23        | NM_010398.1 | Mus musculus histocompatibility 2, T region locus 23 (H2-T23), mRNA.                                                        | 2.61           | -1.33           | Y      |
| scl0076654.1_225-S  | Upp2          | NM_029692.1 | Mus musculus uridine phosphorylase 2 (Upp2), mRNA.                                                                          | 2.26           | -1.46           | Y      |
| scl42858.13_56-S    | Rin3          | NM_177620.2 | Mus musculus Ras and Rab interactor 3 (Rin3), mRNA.                                                                         | 2.14           | -1.75           | Y      |
| scl24019.5_109-S    | Cpt2          | NM_009949   | Mus musculus carnitine palmitoyltransferase 2 (Cpt2), mRNA.                                                                 | 1.86           | -1.25           | Y      |
| scl48561.1.13_8-S   | 0610012G03Rik | NM_025320   | Mus musculus RIKEN cDNA 0610012G03 gene (0610012G03Rik), mRNA.                                                              | 1.73           | -1.32           | Y      |
| scl50689.6_424-S    | Slc35b1       | XM_128634.4 | Mus musculus solute carrier family 35, member B1 (Slc35b1), mRNA.                                                           | 1.66           | -1.36           | Y      |
| scl38453.7.1_27-S   | Csrp2         | NM_007792.2 | Mus musculus cysteine and glycine-rich protein 2 (Csrp2), mRNA.                                                             | 1.66           | -1.35           | Y      |

|                      |               |             |                                                                                                     |       |       |   |
|----------------------|---------------|-------------|-----------------------------------------------------------------------------------------------------|-------|-------|---|
| scl37827.3_399-S     | D10ErtD214e   | NM_134007.2 | Mus musculus DNA segment, Chr 10, ERATO Doi 214, expressed (D10ErtD214e), mRNA.                     | 1.64  | -1.54 | Y |
| scl068195.1_129-S    | Rnaset2       | NM_026611.1 | Mus musculus ribonuclease T2 (Rnaset2), mRNA.                                                       | 1.63  | -1.38 | Y |
| scl35398.12.2_77-S   | Alas1         | NM_020559.1 | Mus musculus aminolevulinic acid synthase 1 (Alas1), mRNA.                                          | 1.62  | -1.36 | Y |
| scl013010.2_9-S      | Cst3          | NM_009976.2 | Mus musculus cystatin C (Cst3), mRNA.                                                               | 1.62  | -1.24 | Y |
| scl27967.7.1_149-S   | Abhd1         | NM_021304.2 | Mus musculus abhydrolase domain containing 1 (Abhd1), mRNA.                                         | 1.60  | -1.25 | Y |
| scl35702.23.1_49-S   | AV340375      | NM_172519.1 | Mus musculus expressed sequence AV340375 (AV340375), mRNA.                                          | 1.54  | -1.66 | Y |
| scl44903.11.3_96-S   | Fars1         | NM_024274.1 | Mus musculus phenylalanine-tRNA synthetase 1 (mitochondrial) (Fars1), mRNA.                         | 1.50  | -1.42 | Y |
| scl0071755.2_316-S   | 1300018L09Rik | NM_027903.1 |                                                                                                     | 1.49  | -1.39 | Y |
| scl013885.9_29-S     | Esd           | NM_016903   |                                                                                                     | 1.48  | -1.27 | Y |
| scl0065111.1_63-S    | Dap3          | NM_022994.2 | Mus musculus death associated protein 3 (Dap3), mRNA.                                               | 1.47  | -1.25 | Y |
| scl0012091.2_274-S   | Glb1          | NM_009752.1 | Mus musculus galactosidase, beta 1 (Glb1), mRNA.                                                    | 1.46  | -1.41 | Y |
| scl28480.7_231-S     | Adipor2       | NM_197985.2 |                                                                                                     | 1.46  | -1.23 | Y |
| scl051800.6_308-S    | Bok           | NM_016778   | Mus musculus Bcl-2-related ovarian killer protein (Bok), mRNA.                                      | 1.45  | -1.74 | Y |
| scl0019299.2_231-S   | Abcd3         | NM_008991.1 | Mus musculus ATP-binding cassette, sub-family D (ALD), member 3 (Abcd3), mRNA.                      | 1.44  | -1.42 | Y |
| scl019122.2_199-S    | Prnp          | NM_011170.1 | Mus musculus prion protein (Prnp), mRNA.                                                            | 1.43  | -1.43 | Y |
| scl020317.1_68-S     | Serpinf1      | NM_011340.2 | Mus musculus serine (or cysteine) proteinase inhibitor, clade F, member 1 (Serpinf1), mRNA.         | 1.41  | -1.30 | Y |
| scl51764.24.1_222-S  | 4933427L07Rik | NM_027727.1 | Mus musculus RIKEN cDNA 4933427L07 gene (4933427L07Rik), mRNA.                                      | 1.39  | -1.60 | Y |
| scl0016923.1_194-S   | Lnk           | NM_008507.2 | Mus musculus linker of T-cell receptor pathways (Lnk), mRNA.                                        | 1.37  | -1.43 | Y |
| scl28963.13.1_27-S   | Nt5c3         | NM_026004.1 | Mus musculus 5-nucleotidase, cytosolic III (Nt5c3), mRNA.                                           | 1.33  | -1.38 | Y |
| scl24777.7.1_203-S   | Akr7a5        | NM_025337.2 | Mus musculus aldo-keto reductase family 7, member A5 (aflatoxin aldehyde reductase) (Akr7a5), mRNA. | 1.31  | -1.35 | Y |
| scl065111.1_137-S    | Dap3          | NM_022994.2 | Mus musculus death associated protein 3 (Dap3), mRNA.                                               | 1.30  | -1.24 | Y |
| scl020382.2_66-S     | Sfrs2         | NM_011358.1 | Mus musculus splicing factor, arginine/serine-rich 2 (SC-35) (Sfrs2), mRNA.                         | -3.04 | 1.49  | Y |
| scl0003591.1_99-S    | Keap1         | NM_016679.2 | Mus musculus kelch-like ECH-associated protein 1 (Keap1), mRNA.                                     | -2.32 | 1.48  | Y |
| scl49146.12.1_4-S    | 2610033C09Rik | NM_026407.2 | Mus musculus RIKEN cDNA 2610033C09 gene (2610033C09Rik), mRNA.                                      | -1.78 | 1.70  | Y |
| scl24607.15_131-S    | Dvl1          | NM_010091.2 | Mus musculus dishevelled, dsh homolog 1 (Drosophila) (Dvl1), mRNA.                                  | -1.74 | 1.45  | Y |
| scl0023881.1_86-S    | E430034L04Rik | NM_011816.2 | Mus musculus RIKEN cDNA E430034L04 gene (E430034L04Rik), mRNA.                                      | -1.51 | 1.31  | Y |
| scl52839.2_29-S      | AI837181      | NM_134149.1 | Mus musculus expressed sequence AI837181 (AI837181), mRNA.                                          | -1.46 | 1.35  | Y |
| scl000086.1_135-S    | AA959742      | NM_133807.1 | Mus musculus expressed sequence AA959742 (AA959742), mRNA.                                          | 16.96 | 1.28  | N |
| scl20056.4.1_63-S    | Map1lc3a      | NM_025735.1 | Mus musculus microtubule-associated protein 1 light chain 3 alpha (Map1lc3a), mRNA.                 | 1.70  | 1.34  | N |
| scl53392.18_161-S    | Mta2          | NM_011842.2 | Mus musculus metastasis-associated gene family, member 2 (Mta2), mRNA.                              | 1.68  | 1.47  | N |
| scl37659.18.259_11-S | Tra1          | NM_011631.1 | Mus musculus tumor rejection antigen gp96 (Tra1), mRNA.                                             | 1.60  | 1.35  | N |
| scl49316.10.1_12-S   | Dnajb11       | XM_148071.1 | Mus musculus Dnaj (Hsp40) homolog, subfamily B, member 11 (Dnajb11), mRNA.                          | 1.52  | 1.89  | N |
| scl020338.1_17-S     | Sel1h         | NM_011344.1 | Mus musculus Sel1 (suppressor of lin-12) 1 homolog (C. elegans) (Sel1h), mRNA.                      | 1.49  | 1.29  | N |
| scl0012055.2_161-S   | Bcl7c         | NM_009746   | Mus musculus B-cell CLL/lymphoma 7C (Bcl7c), mRNA.                                                  | 1.39  | 1.35  | N |
| scl00224938.2_37-S   | Pja2          | NM_144859.1 | Mus musculus praja 2, RING-H2 motif containing (Pja2), mRNA.                                        | 1.27  | 1.33  | N |

| Gene Set  | Number of Genes |
|-----------|-----------------|
| Unchanged | 8               |
| Changed   | 71              |
| Total     | 79              |
| % Changed | 89.87           |

TABLE A14

## GENES SIGNIFICANTLY CHANGED BY THE ATHEROGENIC DIET AND OPP IN SPLEENS

| TargetID              | Symbol        | Accession   | Definition                                                                                                                                                     | AD+DW<br>ND+DW | AD+OPP<br>AD+DW | Change |
|-----------------------|---------------|-------------|----------------------------------------------------------------------------------------------------------------------------------------------------------------|----------------|-----------------|--------|
| scl067596.7_211-S     | 5830405N20Rik | NM_183264.1 | Mus musculus RIKEN cDNA 5830405N20 gene (5830405N20Rik), mRNA.                                                                                                 | 2.56           | -2.44           | Y      |
| scl076071.13_258-S    | Gababrbp      | NM_178394.2 |                                                                                                                                                                | 2.14           | -2.38           | Y      |
| scl017110.1_293-S     | Lzp-s         | NM_013590.2 | Mus musculus P lysozyme structural (Lzp-s), mRNA.                                                                                                              | 2.08           | -5.82           | Y      |
| scl43315.9.1_17-S     | Sh3yl1        | NM_013709.2 | Mus musculus Sh3 domain YSC-like 1 (Sh3yl1), mRNA.                                                                                                             | 2.05           | -1.59           | Y      |
| scl24261.12.1_29-S    | Alad          | NM_008525.3 | Mus musculus aminolevulinate, delta-, dehydratase (Alad), mRNA.                                                                                                | 1.88           | -1.36           | Y      |
| scl0012846.1_253-S    | Comt          | XM_147265.1 | Mus musculus catechol-O-methyltransferase (Comt), mRNA.                                                                                                        | 1.87           | -1.38           | Y      |
| scl25758.6.1_14-S     | 1200006F02Rik | NM_027872.1 | Mus musculus RIKEN cDNA 1200006F02 gene (1200006F02Rik), mRNA.                                                                                                 | 1.85           | -2.21           | Y      |
| scl0216792.1_314-S    | A230051G13Rik | NM_173785.2 |                                                                                                                                                                | 1.85           | -1.33           | Y      |
| scl0093760.1_64-S     | Arid1a        | NM_033566.1 | Mus musculus AT rich interactive domain 1A (Swi1 like) (Arid1a), mRNA.                                                                                         | 1.83           | -1.85           | Y      |
| scl0072691.1_193-S    | 2810048G17Rik | NM_133746.2 | Mus musculus RIKEN cDNA 2810048G17 gene (2810048G17Rik), mRNA.                                                                                                 | 1.78           | -1.58           | Y      |
| scl35771.8.1_41-S     | 2410076I21Rik | XM_134948.2 | Mus musculus RIKEN cDNA 2410076I21 gene (2410076I21Rik), mRNA.                                                                                                 | 1.71           | -1.73           | Y      |
| scl37022.6.1_3-S      | Cd3d          | NM_013487.1 | Mus musculus CD3 antigen, delta polypeptide (Cd3d), mRNA.                                                                                                      | 1.71           | -1.55           | Y      |
| scl0066610.1_317-S    | Abi3          | NM_025659.1 | Mus musculus ABI gene family, member 3 (Abi3), mRNA.                                                                                                           | 1.69           | -1.83           | Y      |
| scl0029809.2_171-S    | Rabgap1l      | NM_013862.3 |                                                                                                                                                                | 1.68           | -1.47           | Y      |
| scl39506.28.1461_10-S | Slc4a1        | NM_011403.1 | Mus musculus solute carrier family 4 (anion exchanger), member 1 (Slc4a1), mRNA.                                                                               | 1.68           | -1.44           | Y      |
| scl50197.1.198_198-S  | Fahd1         | NM_023480.1 |                                                                                                                                                                | 1.66           | -1.30           | Y      |
| scl38917.7_7-S        | Gja1          | NM_010288.2 | Mus musculus gap junction membrane channel protein alpha 1 (Gja1), mRNA.                                                                                       | 1.64           | -1.47           | Y      |
| scl45283.8.141_93-S   | 9030625A04Rik | NM_172488.1 | Mus musculus RIKEN cDNA 9030625A04 gene (9030625A04Rik), mRNA.                                                                                                 | 1.62           | -1.94           | Y      |
| scl0002648.1_0-S      | Mlit3         | NM_027326.2 | Mus musculus myeloid/lymphoid or mixed lineage-leukemia translocation to 3 homolog (Drosophila) (Mlit3), mRNA.                                                 | 1.59           | -1.44           | Y      |
| scl020926.1_330-S     | Supt6h        | NM_009297.1 | Mus musculus suppressor of Ty 6 homolog (S. cerevisiae) (Supt6h), mRNA.                                                                                        | 1.57           | -1.41           | Y      |
| scl35429.19.1_59-S    | 1300017J02Rik | NM_027918.1 | Mus musculus RIKEN cDNA 1300017J02 gene (1300017J02Rik), mRNA.                                                                                                 | 1.56           | -1.40           | Y      |
| scl41638.9.1_29-S     | Timd4         | NM_178759.3 |                                                                                                                                                                | 1.55           | -2.01           | Y      |
| scl19453.6.2634_3-S   | A130092J06Rik | NM_175511.2 | Mus musculus RIKEN cDNA A130092J06 gene (A130092J06Rik), mRNA.                                                                                                 | 1.51           | -1.52           | Y      |
| scl0020452.1_241-S    | Siat8d        | NM_009183.1 | Mus musculus sialyltransferase 8 (alpha-2, 8-sialyltransferase) D (Siat8d), mRNA.                                                                              | 1.48           | -1.67           | Y      |
| scl49300.12_501-S     | St6gal1       | NM_145933.2 | Mus musculus beta galactoside alpha 2,6 sialyltransferase 1 (St6gal1), mRNA.                                                                                   | 1.47           | -1.67           | Y      |
| scl068066.1_115-S     | D11Erd333e    | NM_026542.1 |                                                                                                                                                                | 1.46           | -1.46           | Y      |
| scl021858.1_100-S     | Timp2         | NM_011594.2 | Mus musculus tissue inhibitor of metalloproteinase 2 (Timp2), mRNA.                                                                                            | 1.45           | -1.58           | Y      |
| scl0020947.1_79-S     | Swap70        | NM_009302.2 | Mus musculus SWAP complex protein (Swap70), mRNA.                                                                                                              | 1.45           | -1.50           | Y      |
| scl066158.1_320-S     | 1110012O05Rik | NM_024170   | Mus musculus RIKEN cDNA 1110012O05 gene (1110012O05Rik), mRNA.                                                                                                 | 1.44           | -1.73           | Y      |
| scl0012192.2_207-S    | Zfp36l1       | NM_007564.2 | Mus musculus zinc finger protein 36, C3H type-like 1 (Zfp36l1), mRNA.                                                                                          | 1.43           | -1.93           | Y      |
| scl32299.7.1_25-S     | Stard10       | NM_019990.1 | Mus musculus START domain containing 10 (Stard10), mRNA.                                                                                                       | 1.43           | -1.45           | Y      |
| scl23946.8.1_41-S     | Urod          | NM_009478.1 | Mus musculus uroporphyrinogen decarboxylase (Urod), mRNA.                                                                                                      | 1.43           | -1.27           | Y      |
| scl55061.19.1_283-S   | Slc38a5       | NM_172479.1 |                                                                                                                                                                | 1.42           | -1.39           | Y      |
| scl0012045.1_114-S    | Bcl2a1b       | NM_007534   | Mus musculus B-cell leukemia/lymphoma 2 related protein A1b (Bcl2a1b), mRNA.                                                                                   | 1.41           | -2.31           | Y      |
| scl0054613.2_126-S    | Siat10        | NM_018784.1 | Mus musculus sialyltransferase 10 (alpha-2,3-sialyltransferase VI) (Siat10), mRNA.                                                                             | 1.40           | -1.35           | Y      |
| scl53380.11_494-S     | Fads1         | NM_146094.1 | Mus musculus fatty acid desaturase 1 (Fads1), mRNA.                                                                                                            | 1.39           | -1.24           | Y      |
| scl027556.1_96-S      | Clic4         | XM_124389.1 | Mus musculus chloride intracellular channel 4 (mitochondrial) (Clic4), mRNA.                                                                                   | 1.37           | -1.26           | Y      |
| scl32898.7.1_80-S     | Blvrb         | NM_144923   | Mus musculus biliverdin reductase B (flavin reductase (NADPH)) (Blvrb), mRNA.                                                                                  | 1.35           | -1.54           | Y      |
| scl0067238.2_233-S    | 2810453I06Rik | NM_026050.1 | Mus musculus RIKEN cDNA 2810453I06 gene (2810453I06Rik), mRNA.                                                                                                 | 1.34           | -1.71           | Y      |
| scl33241.10_186-S     | Icbsp1        | NM_008320.2 | Mus musculus interferon consensus sequence binding protein 1 (Icbsp1), mRNA.                                                                                   | 1.33           | -2.06           | Y      |
| scl0231086.16_205-S   | Hadhb         | NM_145558.1 | Mus musculus hydroxacyl-Coenzyme A dehydrogenase/3-ketoacyl-Coenzyme A thiolase/enoyl-Coenzyme A hydratase (Infunctional protein), beta subunit (Hadhb), mRNA. | 1.32           | -1.28           | Y      |
| scl45706.11_2-S       | Ghitm         | NM_078478.1 | Mus musculus growth hormone inducible transmembrane protein (Ghitm), mRNA.                                                                                     | 1.31           | -1.46           | Y      |
| scl30833.27_114-S     | St5           | NM_029811.1 | Mus musculus suppression of tumorigenicity 5 (St5), mRNA.                                                                                                      | 1.30           | -1.49           | Y      |
| scl0001934.1_38-S     | Lmna          | NM_019390.1 | Mus musculus lamin A (Lmna), mRNA.                                                                                                                             | 1.30           | -1.43           | Y      |

|                     |               |             |                                                                                                                        |       |       |   |
|---------------------|---------------|-------------|------------------------------------------------------------------------------------------------------------------------|-------|-------|---|
| scl056812.9_277-S   | Dnajb10       | NM_178055.2 | Mus musculus DnaJ (Hsp40) homolog, subfamily B, member 10 (Dnajb10), mRNA.                                             | 1.29  | -1.65 | Y |
| scl45393.10_71-S    | Bnip3l        | NM_009761.2 | Mus musculus BCL2/adenovirus E1B 19kDa-interacting protein 3-like (Bnip3l), mRNA.                                      | 1.24  | -1.40 | Y |
| scl0016796.1_242-S  | Lasp1         | NM_010688.2 | Mus musculus LIM and SH3 protein 1 (Lasp1), mRNA.                                                                      | -2.29 | 2.05  | Y |
| scl00394432.2_137-S | Ugt1a10       | NM_201642   |                                                                                                                        | -2.13 | 2.48  | Y |
| scl35222.4_425-S    | Myd88         | NM_010851   | Mus musculus myeloid differentiation primary response gene 88 (Myd88), mRNA.                                           | -2.02 | 2.10  | Y |
| scl072042.2_8-S     | Cotl1         | XM_150115.1 | Mus musculus coactosin-like 1 (Dictyostelium) (Cotl1), mRNA.                                                           | -1.96 | 1.86  | Y |
| scl53421.25_339-S   | D19ErtD703e   | NM_029456.1 | Mus musculus DNA segment, Chr 19, ERATO Doi 703, expressed (D19ErtD703e), mRNA.                                        | -1.86 | 1.39  | Y |
| scl011867.9_22-S    | Arpc1b        | NM_023142.1 | Mus musculus actin related protein 2/3 complex, subunit 1B (Arpc1b), mRNA.                                             | -1.83 | 1.65  | Y |
| scl080876.2_10-S    | Ifitm2        | NM_030694   | Mus musculus interferon induced transmembrane protein 2 (Ifitm2), mRNA.                                                | -1.81 | 1.77  | Y |
| scl30947.3_219-S    | Rhog          | NM_019566.2 | Mus musculus ras homolog gene family, member G (Rhog), mRNA.                                                           | -1.80 | 1.60  | Y |
| scl0276770.1_104-S  | Eif5a         | NM_181582.2 | Mus musculus eukaryotic translation initiation factor 5A (Eif5a), mRNA.                                                | -1.76 | 1.41  | Y |
| scl36516.9.290_30-S | Ptk9l         | NM_011876.2 | Mus musculus protein tyrosine kinase 9-like (A6-related protein) (Ptk9l), mRNA.                                        | -1.69 | 1.70  | Y |
| scl50849.26.1_265-S | Myo1f         | NM_053214.1 | Mus musculus myosin IF (Myo1f), mRNA.                                                                                  | -1.63 | 2.04  | Y |
| scl52691.13_82-S    | Psat1         | XM_129211.2 | Mus musculus phosphoserine aminotransferase 1 (Psat1), mRNA.                                                           | -1.54 | 1.71  | Y |
| scl068713.2_9-S     | Ifitm1        | NM_026820   | Mus musculus interferon induced transmembrane protein 1 (Ifitm1), mRNA.                                                | -1.52 | 1.56  | Y |
| scl52675.8.401_6-S  | Ostf1         | NM_017375.1 | Mus musculus osteoclast stimulating factor 1 (Ostf1), mRNA.                                                            | -1.52 | 1.44  | Y |
| scl016541.8_1-S     | Napsa         | NM_008437.1 |                                                                                                                        | -1.47 | 1.43  | Y |
| scl0004022.1_70-S   | Arpc1b        | NM_023142.1 | Mus musculus actin related protein 2/3 complex, subunit 1B (Arpc1b), mRNA.                                             | -1.40 | 1.69  | Y |
| scl54435.12.1_121-S | Was           | NM_009515.1 | Mus musculus Wiskott-Aldrich syndrome homolog (human) (Was), mRNA.                                                     | -1.38 | 1.43  | Y |
| scl056378.6_20-S    | Arpc3         | NM_019824.2 | Mus musculus actin related protein 2/3 complex, subunit 3 (Arpc3), mRNA.                                               | -1.37 | 1.38  | Y |
| scl0059069.1_170-S  | Tpm3          | NM_022314.2 | Mus musculus tropomyosin 3, gamma (Tpm3), mRNA.                                                                        | -1.36 | 1.32  | Y |
| scl50794.7.1_43-S   | Clic1         | NM_033444.1 | Mus musculus chloride intracellular channel 1 (Clic1), mRNA.                                                           | -1.35 | 1.50  | Y |
| scl068089.7_12-S    | Arpc4         | NM_026552   | Mus musculus actin related protein 2/3 complex, subunit 4 (Arpc4), mRNA.                                               | -1.32 | 1.57  | Y |
| scl00230316.2_241-S | Egfl5         | NM_172694.1 | Mus musculus EGF-like-domain, multiple 5 (Egfl5), mRNA.                                                                | 5.33  | 2.40  | N |
| scl48582.2_713-S    | Gp5           | NM_008148.2 | Mus musculus glycoprotein 5 (platelet) (Gp5), mRNA.                                                                    | 3.10  | 1.55  | N |
| scl0023845.2_228-S  | Clecsf5       | NM_021364.1 | Mus musculus C-type (calcium dependent, carbohydrate-recognition domain) lectin, superfamily member 5 (Clecsf5), mRNA. | 3.08  | 2.29  | N |
| scl39908.21.1_34-S  | Cpd           | NM_007754.1 | Mus musculus carboxypeptidase D (Cpd), mRNA.                                                                           | 2.76  | 1.77  | N |
| scl16186.5.1_30-S   | Rgs18         | NM_022881.2 | Mus musculus regulator of G-protein signaling 18 (Rgs18), mRNA.                                                        | 2.67  | 1.62  | N |
| scl30062.4.1_1-S    | Npy           | NM_023456.2 | Mus musculus neuropeptide Y (Npy), mRNA.                                                                               | 2.49  | 1.96  | N |
| scl21429.6_290-S    | Lmo4          | NM_010723.2 | Mus musculus LIM domain only 4 (Lmo4), mRNA.                                                                           | 2.48  | 1.71  | N |
| scl52908.26.6_30-S  | 2610041P08Rik | NM_198008.1 | Mus musculus RIKEN cDNA 2610041P08 gene (2610041P08Rik), mRNA.                                                         | 2.33  | 1.44  | N |
| scl35398.12.2_77-S  | Alas1         | NM_020559.1 | Mus musculus aminolevulinic acid synthase 1 (Alas1), mRNA.                                                             | 2.25  | 2.75  | N |
| scl0012874.1_259-S  | Cpd           | NM_007754.1 | Mus musculus carboxypeptidase D (Cpd), mRNA.                                                                           | 2.16  | 2.10  | N |
| scl41300.23_511-S   | Atp2a3        | NM_016745.2 | Mus musculus ATPase, Ca <sup>++</sup> transporting, ubiquitous (Atp2a3), mRNA.                                         | 2.13  | 1.42  | N |
| scl28709.9_141-S    | Abtb1         | NM_030251.1 | Mus musculus ankyrin repeat and BTB (POZ) domain containing 1 (Abtb1), mRNA.                                           | 2.11  | 1.29  | N |
| scl00234797.2_307-S | 6430548M08Rik | NM_172286.2 | Mus musculus RIKEN cDNA 6430548M08 gene (6430548M08Rik), mRNA.                                                         | 2.07  | 1.73  | N |
| scl28438.14_163-S   | Slc2a3        | NM_011401.2 | Mus musculus solute carrier family 2 (facilitated glucose transporter), member 3 (Slc2a3), mRNA.                       | 2.03  | 2.39  | N |
| scl0002552.1_594-S  | Triobp        | NM_138579.2 | Mus musculus TRIO and F-actin binding protein (Triobp), mRNA.                                                          | 1.96  | 1.52  | N |
| scl0018728.1_38-S   | Pira5         |             |                                                                                                                        | 1.96  | 1.54  | N |
| scl30807.22.1_70-S  | Mrv1          | NM_194464.1 | Mus musculus MRV integration site 1 (Mrv1), transcript variant 1, mRNA.                                                | 1.90  | 1.47  | N |
| scl50763.13.1_199-S | Flot1         | NM_008027.1 | Mus musculus flotillin 1 (Flot1), mRNA.                                                                                | 1.89  | 1.70  | N |
| scl38701.12.1_200-S | Arid3a        | NM_007880.1 | Mus musculus AT rich interactive domain 3A (Bright like) (Arid3a), mRNA.                                               | 1.84  | 2.66  | N |
| scl0002340.1_98-S   | Nin           | NM_008697   | Mus musculus ninenin (Nin), mRNA.                                                                                      | 1.83  | 1.67  | N |
| scl0018230.2_224-S  | Nxn           | NM_008750.2 | Mus musculus nucleoredoxin (Nxn), mRNA.                                                                                | 1.82  | 1.86  | N |
| scl022793.9_329-S   | Zyx           | NM_011777.1 | Mus musculus zyxin (Zyx), mRNA.                                                                                        | 1.79  | 1.80  | N |
| scl34795.4.1_9-S    | Sap30         | NM_021788.1 | Mus musculus sin3 associated polypeptide 5 (Sap30), mRNA.                                                              | 1.75  | 1.67  | N |
| scl37440.14_650-S   | Irak3         | NM_028679.2 | Mus musculus interleukin-1 receptor-associated kinase 3 (Irak3), mRNA.                                                 | 1.74  | 1.68  | N |
| scl51004.4_55-S     | Sepp1         | NM_013759.1 |                                                                                                                        | 1.74  | 1.71  | N |

|                     |               |             |                                                                                                                          |       |       |   |
|---------------------|---------------|-------------|--------------------------------------------------------------------------------------------------------------------------|-------|-------|---|
| scl012765.6_0-S     | Il8rb         | NM_009909.2 | Mus musculus interleukin 8 receptor, beta (Il8rb), mRNA.                                                                 | 1.74  | 2.05  | N |
| scl0023821.2_49-S   | Bace1         | NM_011792.3 | Mus musculus beta-site APP cleaving enzyme 1 (Bace1), mRNA.                                                              | 1.72  | 1.45  | N |
| scl34132.19.1_1-S   | Stxbp2        | NM_011503.2 | Mus musculus syntaxin binding protein 2 (Stxbp2), mRNA.                                                                  | 1.72  | 1.50  | N |
| scl011964.1_274-S   | Atp6v1a1      | NM_007508.2 | Mus musculus ATPase, H+ transporting, V1 subunit A, isoform 1 (Atp6v1a1), mRNA.                                          | 1.72  | 1.55  | N |
| scl48225.31_410-S   | Tiam1         | NM_009384.1 | Mus musculus T-cell lymphoma invasion and metastasis 1 (Tiam1), mRNA.                                                    | 1.70  | 1.74  | N |
| scl069583.1_127-S   | Tnfsf13       | NM_023517.1 | Mus musculus tumor necrosis factor (ligand) superfamily, member 13 (Tnfsf13), mRNA.                                      | 1.67  | 1.67  | N |
| scl0020661.1_145-S  | Sort1         | NM_019972   | Mus musculus sortilin 1 (Sort1), mRNA.                                                                                   | 1.65  | 1.89  | N |
| scl0110253.14_323-S | Triobb        | NM_138579.2 | Mus musculus TRIO and F-actin binding protein (Triobb), mRNA.                                                            | 1.62  | 1.40  | N |
| scl067905.1_18-S    | 2810423O19Rik | NM_026447   | Mus musculus RIKEN cDNA 2810423O19 gene (2810423O19Rik), transcript variant 1, mRNA.                                     | 1.62  | 1.54  | N |
| scl23525.7_662-S    | Agtrap        | NM_009642.3 | Mus musculus angiotensin II, type I receptor-associated protein (Agtrap), mRNA.                                          | 1.60  | 1.82  | N |
| scl013728.1_329-S   | Mark2         | NM_007928.1 | Mus musculus MAP/microtubule affinity-regulating kinase 2 (Mark2), mRNA.                                                 | 1.58  | 1.24  | N |
| scl27109.17.1_35-S  | Plod3         | NM_011962.2 | Mus musculus procollagen-lysine, 2-oxoglutarate 5-dioxygenase 3 (Plod3), mRNA.                                           | 1.58  | 1.57  | N |
| scl19517.6_242-S    | Surf4         | NM_011512.2 | Mus musculus surfait gene 4 (Surf4), mRNA.                                                                               | 1.56  | 1.31  | N |
| scl35462.25_609-S   | Pik3cb        | NM_029094.1 | Mus musculus phosphatidylinositol 3-kinase, catalytic, beta polypeptide (Pik3cb), mRNA.                                  | 1.55  | 1.32  | N |
| scl40534.12.1_29-S  | Tbrg4         | NM_134011.1 | Mus musculus transforming growth factor beta regulated gene 4 (Tbrg4), mRNA.                                             | 1.55  | 1.54  | N |
| scl16390.7_3-S      | Ralb          | NM_022327.3 | Mus musculus v-ral simian leukemia viral oncogene homolog B (ras related) (Ralb), mRNA.                                  | 1.55  | 1.70  | N |
| scl0078334.1_222-S  | 2700084L06Rik | NM_198164.1 | Mus musculus RIKEN cDNA 2700084L06 gene (2700084L06Rik), mRNA.                                                           | 1.53  | 1.47  | N |
| scl0030955.2_290-S  | Pik3cg        | NM_020272.1 | Mus musculus phosphoinositide-3-kinase, catalytic, gamma polypeptide (Pik3cg), mRNA.                                     | 1.52  | 1.41  | N |
| scl23461.27_162-S   | Kcnab2        | NM_010598.2 | Mus musculus potassium voltage-gated channel, shaker-related subfamily, beta member 2 (Kcnab2), mRNA.                    | 1.50  | 1.64  | N |
| scl26088.14.1_16-S  | Aldh2         | NM_009656.1 | Mus musculus aldehyde dehydrogenase 2, mitochondrial (Aldh2), mRNA.                                                      | 1.47  | 1.34  | N |
| scl066989.6_1-S     | 2410004N11Rik | NM_025888.2 | Mus musculus RIKEN cDNA 2410004N11 gene (2410004N11Rik), mRNA.                                                           | 1.46  | 1.31  | N |
| scl24620.16_177-S   | BC004012      | NM_138671   | Mus musculus cDNA sequence BC004012 (BC004012), mRNA.                                                                    | 1.46  | 1.32  | N |
| scl36920.15.1_107-S | Pstpip1       | NM_011193.1 | Mus musculus proline-serine-threonine phosphatase-interacting protein 1 (Pstpip1), mRNA.                                 | 1.46  | 2.00  | N |
| scl54141.46.3_34-S  | Flna          | XM_289920.2 | Mus musculus filamin, alpha (Flna), mRNA.                                                                                | 1.45  | 1.37  | N |
| scl21336.8_145-S    | 3110001A13Rik | NM_025626.3 | Mus musculus RIKEN cDNA 3110001A13 gene (3110001A13Rik), mRNA.                                                           | 1.44  | 1.52  | N |
| scl48556.8.1_18-S   | 2010319C14Rik | NM_024464.2 | Mus musculus RIKEN cDNA 2010319C14 gene (2010319C14Rik), mRNA.                                                           | 1.39  | 1.33  | N |
| scl013244.1_23-S    | Degs          | NM_007853.2 | Mus musculus degenerative spermatocyte homolog (Drosophila) (Degs), mRNA.                                                | 1.36  | 1.29  | N |
| scl36385.5_13-S     | Cklfsf6       | NM_026036.1 | Mus musculus chemokine-like factor super family 6 (Cklfsf6), mRNA.                                                       | 1.36  | 1.54  | N |
| scl16258.13.1_64-S  | Rnpep         | NM_145417   | Mus musculus arginyl aminopeptidase (aminopeptidase B) (Rnpep), mRNA.                                                    | 1.35  | 1.65  | N |
| scl016784.1_5-S     | Lamp2         | NM_010685.2 | Mus musculus lysosomal membrane glycoprotein 2 (Lamp2), mRNA.                                                            | 1.33  | 1.34  | N |
| scl18197.5_22-S     | Rgs19         | NM_026446.2 | Mus musculus regulator of G-protein signaling 19 (Rgs19), mRNA.                                                          | 1.32  | 1.40  | N |
| scl45684.12_151-S   | D14Ert226e    | NM_145928   | Mus musculus DNA segment, Chr 14, ERATO Doi 226, expressed (D14Ert226e), mRNA.                                           | 1.29  | 1.52  | N |
| scl066151.5_253-S   | 1110020C13Rik | NM_025385.2 | Mus musculus RIKEN cDNA 1110020C13 gene (1110020C13Rik), mRNA.                                                           | 1.27  | 1.31  | N |
| scl0114887.6_24-S   | Rmcs1         | NM_207105.1 | Mus musculus response to metastatic cancers 1 (Rmcs1), mRNA.                                                             | -3.00 | -2.87 | N |
| scl43224.11.1_2-S   | Coch          | NM_007728.2 | Mus musculus coagulation factor C homolog (Limulus polyphemus) (Coch), mRNA.                                             | -2.40 | -3.29 | N |
| scl014998.4_34-S    | H2-DMa        | NM_010386   | Mus musculus histocompatibility 2, class II, locus DMa (H2-DMa), mRNA.                                                   | -2.29 | -2.10 | N |
| scl45915.9_517-S    | Dnase1l3      | NM_007870.2 | Mus musculus deoxyribonuclease 1-like 3 (Dnase1l3), mRNA.                                                                | -2.16 | -2.41 | N |
| scl0066748.2_33-S   | 4933404M02Rik | NM_025744.1 | Mus musculus RIKEN cDNA 4933404M02 gene (4933404M02Rik), mRNA.                                                           | -2.02 | -1.56 | N |
| scl0110557.2_204-S  | H2-Q6         | NM_207648   | Mus musculus histocompatibility 2, Q region locus 6 (H2-Q6), mRNA.                                                       | -1.82 | -2.22 | N |
| scl0002580.1_4-S    | Ptp4a3        | NM_008975.2 | Mus musculus protein tyrosine phosphatase 4a3 (Ptp4a3), mRNA.                                                            | -1.80 | -1.80 | N |
| scl000781.1_68-S    | Kif21b        | NM_019962.2 | Mus musculus kinesin family member 21B (Kif21b), mRNA.                                                                   | -1.75 | -1.79 | N |
| scl40203.12_25-S    | Sparc         | NM_009242   | Mus musculus secreted acidic cysteine rich glycoprotein (Sparc), mRNA.                                                   | -1.67 | -1.74 | N |
| scl0013829.2_259-S  | Epb4.9        | NM_013514.2 | Mus musculus erythrocyte protein band 4.9 (Epb4.9), mRNA.                                                                | -1.65 | -1.28 | N |
| scl056620.6_30-S    | Clecsf10      | NM_020001.1 | Mus musculus C-type (calcium dependent, carbohydrate recognition domain) lectin, superfamily member 10 (Clecsf10), mRNA. | -1.60 | -1.93 | N |
| scl022142.1_236-S   | Tuba1         | NM_011653   | Mus musculus tubulin, alpha 1 (Tuba1), mRNA.                                                                             | -1.50 | -1.36 | N |
| scl0003429.1_37-S   | Hmbs          | NM_013551   | Mus musculus hydroxymethylbilane synthase (Hmbs), mRNA.                                                                  | -1.49 | -1.43 | N |
| scl000673.1_3-S     | Prdx2         | NM_011563   | Mus musculus peroxiredoxin 2 (Prdx2), mRNA.                                                                              | -1.48 | -1.53 | N |
| scl42795.16.1_26-S  | Evl           | NM_007965.2 | Mus musculus Ena-vasodilator stimulated phosphoprotein (Evl), mRNA.                                                      | -1.46 | -2.40 | N |

|                    |               |             |                                                                                 |       |       |   |
|--------------------|---------------|-------------|---------------------------------------------------------------------------------|-------|-------|---|
| scl41542.4_321-S   | Gm2a          | NM_010299.2 | Mus musculus GM2 ganglioside activator protein (Gm2a), mRNA.                    | -1.43 | -1.86 | N |
| scl0224703.1_41-S  | 9530046H09Rik | NM_145486.2 | Mus musculus RIKEN cDNA 9530046H09 gene (9530046H09Rik), mRNA.                  | -1.33 | -1.48 | N |
| scl012988.1_164-S  | Csk           | NM_007783.2 | Mus musculus c-src tyrosine kinase (Csk), mRNA.                                 | -1.33 | -1.50 | N |
| scl012521.1_26-S   | Kai1          | NM_007656.1 | Mus musculus kangai 1 (suppression of tumorigenicity 6, prostate) (Kai1), mRNA. | -1.28 | -1.39 | N |
| scl0022214.2_142-S | Ube2h         | XM_133034.1 | Mus musculus ubiquitin-conjugating enzyme E2H (Ube2h), mRNA.                    | -1.27 | -1.36 | N |

| Gene Set  | Number of Genes |
|-----------|-----------------|
| Unchanged | 78              |
| Changed   | 67              |
| Total     | 145             |
| % Changed | 46.21           |

TABLE A15

## GENES SIGNIFICANTLY CHANGED BY THE ATHEROGENIC DIET AND OPP IN HEARTS

| TargetID            | Symbol        | Accession   | Definition                                                                                                  | AD+DW<br>ND+DW | AD+OPP<br>AD+DW | Change |
|---------------------|---------------|-------------|-------------------------------------------------------------------------------------------------------------|----------------|-----------------|--------|
| sci40333.9_365-S    | Mat2b         | NM_134017.1 | Mus musculus methionine adenosyltransferase II, beta (Mat2b), mRNA.                                         | 4.67           | -1.34           | Y      |
| sci54562.12.1_64-S  | Alas2         | NM_009653.1 | Mus musculus aminolevulinic acid synthase 2, erythroid (Alas2), mRNA.                                       | 2.43           | -1.59           | Y      |
| sci0017765.2_254-S  | Mtf2          | NM_013827.1 | Mus musculus metal response element binding transcription factor 2 (Mtf2), mRNA.                            | 2.15           | -1.38           | Y      |
| sci19105.6_353-S    | Ttn           | XM_130312.3 | Mus musculus titin (Ttn), mRNA.                                                                             | 2.10           | -1.22           | Y      |
| sci0076895.2_316-S  | Bicd2         | NM_029791.2 | Mus musculus bicaudal D homolog 2 (Drosophila) (Bicd2), mRNA.                                               | 2.03           | -1.54           | Y      |
| sci0022070.1_31-S   | Tpt1          | NM_009429   | Mus musculus tumor protein, translationally-controlled 1 (Tpt1), mRNA.                                      | 2.02           | -1.27           | Y      |
| sci42532.6_0-S      | Tm4sf13       | NM_025359.2 | Mus musculus transmembrane 4 superfamily member 13 (Tm4sf13), mRNA.                                         | 1.99           | -1.58           | Y      |
| sci32857.8.1_60-S   | Lgals4        | NM_010706.1 | Mus musculus lectin, galactose binding, soluble 4 (Lgals4), mRNA.                                           | 1.96           | -1.30           | Y      |
| sci36105.10.25_13-S | Tbx20         | NM_194263.1 | Mus musculus T-box 20 (Tbx20), transcript variant 2, mRNA.                                                  | 1.83           | -1.51           | Y      |
| sci26992.46_0-S     | A1481500      | NM_133901.1 | Mus musculus expressed sequence A1481500 (A1481500), mRNA.                                                  | 1.80           | -1.31           | Y      |
| sci0003447.1_0-S    | Rbm5          | NM_148930.2 | Mus musculus RNA binding motif protein 5 (Rbm5), mRNA.                                                      | 1.77           | -1.83           | Y      |
| sci17047.9.4_6-S    | BC013667      | NM_172266.1 | Mus musculus cDNA sequence BC013667 (BC013667), mRNA.                                                       | 1.72           | -1.33           | Y      |
| sci0001100.1_114-S  | Aqp1          | NM_007472.1 | Mus musculus aquaporin 1 (Aqp1), mRNA.                                                                      | 1.59           | -1.20           | Y      |
| sci50134.9_8-S      | Nudt3         | NM_019837.1 | Mus musculus nudix (nucleotide diphosphate linked moiety X)-type motif 3 (Nudt3), mRNA.                     | 1.57           | -1.20           | Y      |
| sci21522.25_9-S     | Egf           | NM_010113.1 | Mus musculus epidermal growth factor (Egf), mRNA.                                                           | 1.50           | -1.71           | Y      |
| sci0224807.4_25-S   | BC026370      | NM_198167.1 | Mus musculus cDNA sequence BC026370 (BC026370), mRNA.                                                       | 1.42           | -1.56           | Y      |
| sci27246.12.1_228-S | BC035291      | NM_177581.2 | Mus musculus cDNA sequence BC035291 (BC035291), mRNA.                                                       | 1.42           | -1.34           | Y      |
| sci0003527.1_242-S  | Ddx6          | NM_007841.2 | Mus musculus DEAD (Asp-Glu-Ala-Asp) box polypeptide 6 (Ddx6), mRNA.                                         | 1.40           | -1.30           | Y      |
| sci22977.3.91_193-S | Dpm3          | XM_130951.1 | Mus musculus dolichyl-phosphate mannosyltransferase polypeptide 3 (Dpm3), mRNA.                             | 1.38           | -1.27           | Y      |
| sci27262.6_658-S    | 9130017A15Rik | NM_177242.3 | Mus musculus RIKEN cDNA 9130017A15 gene (9130017A15Rik), mRNA.                                              | 1.35           | -1.18           | Y      |
| sci067371.1_2-S     | 2410016F19Rik | NM_026113.2 | Mus musculus RIKEN cDNA 2410016F19 gene (2410016F19Rik), mRNA.                                              | 1.34           | -1.47           | Y      |
| sci21064.31_2-S     | 5830434P21Rik | NM_172661.2 | Mus musculus RIKEN cDNA 5830434P21 gene (5830434P21Rik), mRNA.                                              | 1.30           | -1.18           | Y      |
| sci0015516.2_121-S  | Hspcb         | NM_008302.2 | Mus musculus heat shock protein 1, beta (Hspcb), mRNA.                                                      | 1.26           | -1.29           | Y      |
| sci17563.43_11-S    | Clasp1        |             | Mus musculus CLIP associating protein 1 (Clasp1), mRNA.                                                     | 1.20           | -1.17           | Y      |
| sci0003537.1_10-S   | Pcolce2       | NM_029620.1 | Mus musculus procollagen C-endopeptidase enhancer 2 (Pcolce2), mRNA.                                        | -2.50          | 2.01            | Y      |
| sci29544.11_278-S   | Mfap5         | NM_015776   | Mus musculus microfibrillar associated protein 5 (Mfap5), mRNA.                                             | -1.89          | 2.05            | Y      |
| sci0230514.5_86-S   | Obrgrp        | NM_175036   | Mus musculus leptin receptor gene-related protein (Obrgrp), mRNA.                                           | -1.57          | 1.25            | Y      |
| sci33301.5.15_0-S   | Nudt7         | NM_024437   | Mus musculus nudix (nucleoside diphosphate linked moiety X)-type motif 7 (Nudt7), mRNA.                     | -1.54          | 1.21            | Y      |
| sci28399.6.24_1-S   | Cd9           | NM_007657.2 | Mus musculus CD9 antigen (Cd9), mRNA.                                                                       | -1.53          | 1.31            | Y      |
| sci0003638.1_65-S   | 2310016C16Rik | NM_027127.1 | Mus musculus RIKEN cDNA 2310016C16 gene (2310016C16Rik), mRNA.                                              | -1.48          | 1.45            | Y      |
| sci020719.1_146-S   | Serpib6a      | NM_009254.2 | Mus musculus serine (or cysteine) proteinase inhibitor, clade B, member 6a (Serpib6a), mRNA.                | -1.44          | 1.17            | Y      |
| sci36472.2.242_20-S | Gpx1          | NM_008160.1 | Mus musculus glutathione peroxidase 1 (Gpx1), mRNA.                                                         | -1.36          | 1.24            | Y      |
| sci0012540.1_20-S   | Cdc42         | NM_009861.1 | Mus musculus cell division cycle 42 homolog (S. cerevisiae) (Cdc42), mRNA.                                  | -1.30          | 1.20            | Y      |
| sci0004022.1_70-S   | Arpc1b        | NM_023142.1 | Mus musculus actin related protein 2/3 complex, subunit 1B (Arpc1b), mRNA.                                  | -1.26          | 1.44            | Y      |
| sci0319186.1_75-S   | Hist1h2bm     | NM_178200   | Mus musculus histone 1, H2bm (Hist1h2bm), mRNA.                                                             | -1.22          | 1.23            | Y      |
| sci000941.1_0-S     | Ndufs2        | NM_153064.3 | Mus musculus NADH dehydrogenase (ubiquinone) Fe-S protein 2 (Ndufs2), mRNA.                                 | -1.20          | 1.17            | Y      |
| sci019989.6_6-S     | Rpl7          | NM_011291   | Mus musculus ribosomal protein L7 (Rpl7), mRNA.                                                             | -1.19          | 1.23            | Y      |
| sci54154.5.1_20-S   | Idh3g         | NM_008323.1 | Mus musculus isocitrate dehydrogenase 3 (NAD+), gamma (Idh3g), mRNA.                                        | -1.15          | 1.32            | Y      |
| sci53358.2.1_26-S   | Ms4a6c        | NM_028595   | Mus musculus membrane-spanning 4-domains, subfamily A, member 6C (Ms4a6c), mRNA.                            | 2.17           | 1.60            | N      |
| sci27109.17.1_35-S  | Plod3         | NM_011962.2 | Mus musculus procollagen-lysine, 2-oxoglutarate 5-dioxygenase 3 (Plod3), mRNA.                              | 1.76           | 1.18            | N      |
| sci020393.12_71-S   | Sgk           | NM_011361.1 | Mus musculus serum/glucocorticoid regulated kinase (Sgk), mRNA.                                             | 1.61           | 1.35            | N      |
| sci44868.8_25-S     | Gcnt2         | NM_008105.2 | Mus musculus glucosaminyl (N-acetyl) transferase 2, I-branching enzyme (Gcnt2), transcript variant 3, mRNA. | 1.59           | 1.38            | N      |
| sci48644.15_23-S    | C330012H03Rik | NM_183029.1 | Mus musculus RIKEN cDNA C330012H03 gene (C330012H03Rik), mRNA.                                              | 1.56           | 1.42            | N      |
| sci55015.6.1_13-S   | Timp1         | NM_011593   | Mus musculus tissue inhibitor of metalloproteinase 1 (Timp1), mRNA.                                         | 1.54           | 2.01            | N      |



|                     |               |             |                                                                                            |       |       |   |
|---------------------|---------------|-------------|--------------------------------------------------------------------------------------------|-------|-------|---|
| scl066576.4_1-S     | Uqcrh         | NM_025641.2 |                                                                                            | 1.53  | 1.20  | N |
| scl20807.21.1_18-S  | Dncic2        | NM_010064   | Mus musculus dynein, cytoplasmic, intermediate chain 2 (Dncic2), mRNA.                     | 1.53  | 1.26  | N |
| scl018139.26_3-S    | Zfml          | NM_008717.1 |                                                                                            | 1.52  | 1.27  | N |
| scl23237.22_584-S   | 3110057O12Rik | NM_026622.1 | Mus musculus RIKEN cDNA 3110057O12 gene (3110057O12Rik), mRNA.                             | 1.52  | 1.35  | N |
| scl47073.5.231_36-S | Ly6c          | NM_010741   | Mus musculus lymphocyte antigen 6 complex, locus C (Ly6c), mRNA.                           | 1.45  | 1.41  | N |
| scl0229543.1_170-S  | C77668        | NM_145540.2 | Mus musculus expressed sequence C77668 (C77668), transcript variant 1, mRNA.               | 1.42  | 1.49  | N |
| scl28291.1_56-S     | Tctex1        | NM_009342   | Mus musculus t-complex testis expressed 1 (Tctex1), mRNA.                                  | 1.38  | 1.24  | N |
| scl34564.9_192-S    | 4930527D15Rik | NM_026350.1 | Mus musculus RIKEN cDNA 4930527D15 gene (4930527D15Rik), mRNA.                             | 1.38  | 1.28  | N |
| scl0319160.1_25-S   | Hist1h4k      | NM_178211.1 | Mus musculus histone 1, H4k (Hist1h4k), mRNA.                                              | 1.37  | 1.31  | N |
| scl34621.8_577-S    | Ednra         | NM_010332.1 | Mus musculus endothelin receptor type A (Ednra), mRNA.                                     | 1.34  | 1.29  | N |
| scl067267.4_0-S     | 2900010M23Rik | NM_026063.1 | Mus musculus RIKEN cDNA 2900010M23 gene (2900010M23Rik), mRNA.                             | 1.29  | 1.16  | N |
| scl43495.3.1_6-S    | 2310016C16Rik | NM_027127.1 | Mus musculus RIKEN cDNA 2310016C16 gene (2310016C16Rik), mRNA.                             | 1.26  | 1.20  | N |
| scl54930.9.1_1-S    | Hprt          | NM_013556   |                                                                                            | 1.23  | 1.20  | N |
| scl021937.10_167-S  | Tnfrsf1a      | NM_011609.2 | Mus musculus tumor necrosis factor receptor superfamily, member 1a (Tnfrsf1a), mRNA.       | 1.18  | 1.38  | N |
| scl30345.6_391-S    | Kcnd2         | XM_132981.1 | Mus musculus potassium voltage-gated channel, Shal-related family, member 2 (Kcnd2), mRNA. | -1.70 | -1.47 | N |
| scl34280.9.1_28-S   | 2310061C15Rik | NM_026844.2 |                                                                                            | -1.48 | -1.24 | N |
| scl39616.9.169_52-S | Nr1d1         | NM_145434.1 | Mus musculus nuclear receptor subfamily 1, group D, member 1 (Nr1d1), mRNA.                | -1.34 | -1.58 | N |
| scl34581.9.1_48-S   | Gpsn2         | NM_134118.1 | Mus musculus glycoprotein, synaptic 2 (Gpsn2), mRNA.                                       | -1.32 | -1.25 | N |
| scl067956.13_1-S    | 2410195B05Rik | NM_030241.2 | Mus musculus RIKEN cDNA 2410195B05 gene (2410195B05Rik), mRNA.                             | -1.32 | -1.28 | N |
| scl020382.2_66-S    | Sfrs2         | NM_011358.1 | Mus musculus splicing factor, arginine/serine-rich 2 (SC-35) (Sfrs2), mRNA.                | -1.26 | -1.19 | N |
| scl37421.7_120-S    | Rassf3        | NM_138956   | Mus musculus Ras association (RalGDS/AF-6) domain family 3 (Rassf3), mRNA.                 | -1.20 | -1.27 | N |

| Gene Set  | Number of Genes |
|-----------|-----------------|
| Unchanged | 27              |
| Changed   | 38              |
| Total     | 65              |
| % Changed | 58.46           |
